# Supplementary material for: Association between Arsenic Level, Gene Expression in Asian Population, and In Vitro Carcinogenic Bladder Tumor
Source: Hindawi journal article supplement (doi:10.1155/2022/3459855), 2022-01-01
Supplement: f2 [file 3459855.f2.pdf]

**Table S1. Disease as well as Molecular and Cellular Functions associated with different genes selected in different conditions.**

Data1

**a. Disease as well as Molecular and Cellular Functions associated with the differentially expressed genes between Low, High arsenic exposure and sex.**

Disease

| Name                                | p-value range       | # Molecules |
|-------------------------------------|---------------------|-------------|
| Cancer                              | 3.75E-04 - 6.75E-18 | 419         |
| Organismal Injury and Abnormalities | 3.75E-04 - 6.75E-18 | 423         |
| Endocrine System Disorders          | 2.29E-04 - 4.68E-10 | 334         |
| Hematological Disease               | 3.44E-04 - 1.18E-09 | 130         |
| Immunological Disease               | 3.50E-04 - 1.18E-09 | 172         |

Molecular and Cellular Functions

| Name                                   | p-value range       | # Molecules |
|----------------------------------------|---------------------|-------------|
| Cell Death and Survival                | 3.55E-04 - 9.52E-11 | 170         |
| Cellular Function and Maintenance      | 2.88E-04 - 6.50E-10 | 145         |
| Cell Morphology                        | 3.75E-04 - 6.96E-08 | 45          |
| Cell Cycle                             | 3.61E-04 - 8.45E-08 | 59          |
| Cell-To-Cell Signaling and Interaction | 3.75E-04 - 1.95E-07 | 91          |

**b. Disease as well as Molecular and Cellular Functions associated with the differentially expressed genes between Low vs High arsenic exposure**

Disease

| Name                                | p-value range       | # Molecules |
|-------------------------------------|---------------------|-------------|
| Cancer                              | 1.10E-02 - 1.76E-14 | 211         |
| Organismal Injury and Abnormalities | 1.10E-02 - 1.76E-14 | 212         |
| Gastrointestinal Disease            | 9.50E-03 - 5.81E-10 | 187         |
| Endocrine System Disorders          | 9.95E-03 - 4.22E-07 | 168         |
| Reproductive System Disease         | 1.10E-02 - 2.39E-06 | 132         |

Molecular and Cellular Functions

| Name                                   | p-value range       | # Molecules |
|----------------------------------------|---------------------|-------------|
| Protein Synthesis                      | 1.01E-02 - 5.07E-05 | 43          |
| Cell-To-Cell Signaling and Interaction | 1.11E-02 - 6.81E-05 | 41          |
| Cellular Assembly and Organization     | 9.50E-03 - 6.81E-05 | 25          |
| Lipid Metabolism                       | 9.88E-03 - 1.75E-04 | 11          |
| Molecular Transport                    | 9.88E-03 - 1.75E-04 | 48          |

**c. Disease as well as Molecular and Cellular Functions associated with the differentially expressed genes between males and females**

Disease

| Name                        | p-value range       | # Molecules |
|-----------------------------|---------------------|-------------|
| Connective Tissue Disorders | 1.25E-05 - 1.66E-14 | 91          |
| Immunological Disease       | 1.38E-05 - 1.66E-14 | 192         |
| Inflammatory Disease        | 5.56E-06 - 1.66E-14 | 114         |

|                                     |                     |     |
|-------------------------------------|---------------------|-----|
| Organismal Injury and Abnormalities | 1.43E-05 - 1.66E-14 | 453 |
| Skeletal and Muscular Disorders     | 1.25E-05 - 1.66E-14 | 108 |

#### Molecular and Cellular Functions

| Name                                   | p-value range       | # Molecules |
|----------------------------------------|---------------------|-------------|
| Cell Death and Survival                | 1.28E-05 - 1.52E-12 | 185         |
| Cellular Function and Maintenance      | 1.50E-05 - 6.78E-12 | 117         |
| Cell-To-Cell Signaling and Interaction | 1.48E-05 - 1.14E-11 | 108         |
| Cellular Movement                      | 1.48E-05 - 1.50E-10 | 145         |
| Cellular Development                   | 1.39E-05 - 2.07E-10 | 160         |

#### Data2

**d. Disease as well as Molecular and Cellular Functions associated with the differentially expressed genes between Low, Medium, High arsenic exposure and sex**

#### Disease

| Name                                | p-value range       | # Molecules |
|-------------------------------------|---------------------|-------------|
| Inflammatory Response               | 1.21E-03 - 4.26E-12 | 110         |
| Organismal Injury and Abnormalities | 1.12E-03 - 4.26E-12 | 264         |
| Gastrointestinal Disease            | 1.05E-03 - 1.22E-11 | 231         |
| Connective Tissue Disorders         | 1.06E-03 - 4.29E-11 | 67          |
| Inflammatory Disease                | 9.88E-04 - 4.29E-11 | 89          |

#### Molecular and Cellular Functions

| Name                                   | p-value range       | # Molecules |
|----------------------------------------|---------------------|-------------|
| Cellular Movement                      | 1.21E-03 - 9.89E-14 | 103         |
| Cellular Compromise                    | 8.98E-04 - 2.50E-09 | 36          |
| Cell Death and Survival                | 1.14E-03 - 5.97E-09 | 105         |
| Cell-To-Cell Signaling and Interaction | 9.90E-04 - 1.02E-08 | 62          |
| Cell Morphology                        | 1.21E-03 - 1.21E-07 | 31          |

**e. Disease as well as Molecular and Cellular Functions associated with the differentially expressed genes between Low Medium High arsenic exposure**

#### Disease

| Name                                | p-value range       | # Molecules |
|-------------------------------------|---------------------|-------------|
| Organismal Injury and Abnormalities | 4.32E-03 - 2.64E-10 | 269         |
| Respiratory Disease                 | 3.74E-03 - 2.64E-10 | 88          |
| Infectious Diseases                 | 3.09E-03 - 2.81E-10 | 37          |
| Gastrointestinal Disease            | 4.09E-03 - 3.05E-10 | 153         |
| Inflammatory Disease                | 3.09E-03 - 6.54E-10 | 70          |

#### Molecular and Cellular Functions

| Name                              | p-value range       | # Molecules |
|-----------------------------------|---------------------|-------------|
| Cellular Movement                 | 4.20E-03 - 2.37E-07 | 87          |
| Cellular Compromise               | 3.09E-03 - 5.69E-07 | 31          |
| Cellular Development              | 4.32E-03 - 4.72E-06 | 64          |
| Cellular Growth and Proliferation | 4.21E-03 - 4.72E-06 | 73          |

|            |                     |    |
|------------|---------------------|----|
| Cell Cycle | 4.09E-03 - 7.14E-06 | 55 |
|------------|---------------------|----|

**f. Disease as well as Molecular and Cellular Functions associated with the differentially expressed genes between males and females**

**Disease**

| Name                                   | p-value range       | # Molecules |
|----------------------------------------|---------------------|-------------|
| Inflammatory Response                  | 1.80E-04 - 7.99E-19 | 132         |
| Organismal Injury and Abnormalities    | 1.85E-04 - 7.99E-19 | 259         |
| Dermatological Diseases and Conditions | 1.16E-04 - 3.82E-15 | 184         |
| Immunological Disease                  | 1.16E-04 - 3.82E-15 | 122         |
| Inflammatory Disease                   | 1.43E-04 - 3.42E-14 | 107         |

**Molecular and Cellular Functions**

| Name                                   | p-value range       | # Molecules |
|----------------------------------------|---------------------|-------------|
| Cell-To-Cell Signaling and Interaction | 1.89E-04 - 1.60E-17 | 92          |
| Cellular Movement                      | 1.85E-04 - 2.92E-17 | 109         |
| Cellular Compromise                    | 1.42E-04 - 5.07E-12 | 39          |
| Cellular Development                   | 1.77E-04 - 3.11E-10 | 104         |
| Cellular Growth and Proliferation      | 1.77E-04 - 3.11E-10 | 107         |

**g. Disease as well as Molecular and Cellular Functions associated with the differentially expressed genes between Low High arsenic exposure**

**Disease**

| Name                                | p-value range       | # Molecules |
|-------------------------------------|---------------------|-------------|
| Cancer                              | 4.35E-03 - 8.38E-11 | 340         |
| Organismal Injury and Abnormalities | 4.35E-03 - 8.38E-11 | 350         |
| Inflammatory Response               | 4.35E-03 - 3.53E-10 | 113         |
| Gastrointestinal Disease            | 4.35E-03 - 8.47E-09 | 296         |
| Connective Tissue Disorders         | 3.48E-03 - 4.07E-08 | 79          |

**Molecular and Cellular Functions**

| Name                                   | p-value range       | # Molecules |
|----------------------------------------|---------------------|-------------|
| Cellular Compromise                    | 2.49E-03 - 3.53E-10 | 37          |
| Cellular Movement                      | 4.14E-03 - 6.37E-09 | 110         |
| Lipid Metabolism                       | 4.14E-03 - 3.96E-06 | 36          |
| Small Molecule Biochemistry            | 4.14E-03 - 3.96E-06 | 38          |
| Cell-To-Cell Signaling and Interaction | 3.90E-03 - 4.48E-06 | 61          |

**h. Disease as well as Molecular and Cellular Functions associated with the differentially expressed genes between Low Medium arsenic exposure**

**Disease**

| Name                                | p-value range       | # Molecules |
|-------------------------------------|---------------------|-------------|
| Cancer                              | 1.25E-03 - 3.50E-13 | 367         |
| Organismal Injury and Abnormalities | 1.25E-03 - 3.50E-13 | 374         |
| Gastrointestinal Disease            | 1.25E-03 - 2.83E-10 | 323         |
| Respiratory Disease                 | 8.84E-04 - 3.16E-09 | 116         |

|                     |                     |    |
|---------------------|---------------------|----|
| Infectious Diseases | 7.56E-04 - 5.66E-09 | 45 |
|---------------------|---------------------|----|

#### Molecular and Cellular Functions

| Name                                   | p-value range       | # Molecules |
|----------------------------------------|---------------------|-------------|
| Cell-To-Cell Signaling and Interaction | 8.98E-04 - 1.26E-08 | 72          |
| Cellular Movement                      | 1.23E-03 - 1.90E-08 | 113         |
| Cellular Compromise                    | 2.97E-04 - 1.12E-07 | 38          |
| Cellular Development                   | 1.13E-03 - 2.45E-07 | 110         |
| Cellular Growth and Proliferation      | 1.13E-03 - 2.45E-07 | 117         |

#### i. Disease as well as Molecular and Cellular Functions associated with the differentially expressed genes between Medium High arsenic exposure

##### Disease

| Name                                | p-value range       | # Molecules |
|-------------------------------------|---------------------|-------------|
| Connective Tissue Disorders         | 2.40E-02 - 8.01E-06 | 27          |
| Inflammatory Disease                | 2.40E-02 - 8.01E-06 | 32          |
| Organismal Injury and Abnormalities | 2.64E-02 - 8.01E-06 | 83          |
| Skeletal and Muscular Disorders     | 2.40E-02 - 8.01E-06 | 27          |
| Infectious Diseases                 | 2.56E-02 - 1.87E-05 | 20          |

#### Molecular and Cellular Functions

| Name                    | p-value range       | # Molecules |
|-------------------------|---------------------|-------------|
| Cell Morphology         | 2.56E-02 - 5.50E-05 | 20          |
| Cellular Compromise     | 2.56E-02 - 5.50E-05 | 13          |
| Gene Expression         | 2.56E-02 - 5.50E-05 | 13          |
| Cellular Movement       | 2.56E-02 - 1.82E-04 | 21          |
| Carbohydrate Metabolism | 2.56E-02 - 9.86E-04 | 4           |
