# Supplementary material for: Association between Arsenic Level, Gene Expression in Asian Population, and In Vitro Carcinogenic Bladder Tumor
Source: Hindawi journal article supplement (doi:10.1155/2022/3459855), 2022-01-01
Supplement: f3 [file 3459855.f3.pdf]

Table S2. Significant pathways in Data-1 and Data-2, and the overlap between two (highlighted in green).

| Data1 |        |                                                      |         |          |            |          |                                                                                                                                                |            |         |            |
|-------|--------|------------------------------------------------------|---------|----------|------------|----------|------------------------------------------------------------------------------------------------------------------------------------------------|------------|---------|------------|
| S.No. | Symbol | Name                                                 | f.value | p.value  | X.log10.p. | FDR      | Fisher.s.LSD                                                                                                                                   | entrezgene | AffyID  | HGNC       |
| 1     | KDM6A  | lysine demethylase 6A                                | 204.8   | 1.02E-17 | 16.992     | 5.09E-14 | high-female - high-male; low-female - high-female; high-female - low-male; low-female - high-male; low-male - high-male; low-female - low-male | 7403       | 7403_at | HGNC:12637 |
| 2     | KDM5C  | lysine demethylase 5C                                | 71.271  | 2.19E-12 | 11.66      | 5.47E-09 | high-female - high-male; low-female - high-female; high-female - low-male; low-female - high-male; high-male - low-male; low-female - low-male | 8242       | 8242_at | HGNC:11114 |
| 3     | TMSB4Y | thymosin beta 4 Y-linked                             | 56.911  | 2.60E-11 | 10.585     | 4.33E-08 | high-male - high-female; low-female - high-female; low-male - high-female; high-male - low-female; high-male - low-male; low-male - low-female | 9087       | 9087_at | HGNC:11882 |
| 4     | PRKY   | protein kinase Y-linked (pseudogene)                 | 54.34   | 4.28E-11 | 10.368     | 5.35E-08 | high-male - high-female; low-female - high-female; low-male - high-female; high-male - low-female; low-male - high-male; low-male - low-female | 5616       | 5616_at | HGNC:9444  |
| 5     | ZFX    | zinc finger protein X-linked                         | 39.957  | 1.09E-09 | 8.9622     | 1.02E-06 | high-female - high-male; low-female - high-female; high-female - low-male; low-female - high-male; high-male - low-male; low-female - low-male | 7543       | 7543_at | HGNC:12869 |
| 6     | EIF1AX | eukaryotic translation initiation factor 1A X-linked | 39.494  | 1.23E-09 | 8.9103     | 1.02E-06 | high-female - high-male; low-female - high-female; high-female - low-male; low-female - high-male; low-male - high-male; low-female - low-male | 1964       | 1964_at | HGNC:3250  |
| 7     | SMC1A  | structural maintenance of chromosomes 1A             | 24.427  | 1.33E-07 | 6.8764     | 9.49E-05 | high-female - high-male; low-female - high-female; high-female - low-male; low-female - high-male; high-male - low-male; low-female - low-male | 8243       | 8243_at | HGNC:11111 |

|    |          |                                                |        |            |        |           |                                                                                                                                                |           |              |            |
|----|----------|------------------------------------------------|--------|------------|--------|-----------|------------------------------------------------------------------------------------------------------------------------------------------------|-----------|--------------|------------|
| 8  | PRKX     | protein kinase X-linked                        | 17.646 | 2.31E-06   | 5.6356 | 0.0014462 | high-female - high-male; low-female - high-female; high-female - low-male; low-female - high-male; high-male - low-male; low-female - low-male | 5613      | 5613_at      | HGNC:9441  |
| 9  | DDX3X    | DEAD-box helicase 3 X-linked                   | 16.315 | 4.41E-06   | 5.3552 | 0.0024516 | high-female - high-male; high-female - low-female; high-female - low-male; low-female - high-male; low-male - high-male; low-female - low-male | 1654      | 1654_at      | HGNC:2745  |
| 10 | TXLNG    | taxilin gamma                                  | 15.9   | 5.44E-06   | 5.2647 | 0.0027174 | high-female - high-male; low-female - high-female; high-female - low-male; low-female - high-male; high-male - low-male; low-female - low-male | 55787     | 55787_at     | HGNC:18578 |
| 11 | PNPLA4   | patatin like phospholipase domain containing 4 | 13.133 | 2.40E-05   | 4.6199 | 0.010903  | high-female - high-male; low-female - high-female; high-female - low-male; low-female - high-male; high-male - low-male; low-female - low-male | 8228      | 8228_at      | HGNC:24887 |
| 12 | SCARNA9L | small Cajal body-specific RNA 9 like           | 11.662 | 5.70E-05   | 4.2438 | 0.023766  | high-female - high-male; high-female - low-female; high-female - low-male; low-female - high-male; high-male - low-male; low-female - low-male | 100158262 | 100158262_at | HGNC:33559 |
| 13 | RPS4X    | ribosomal protein S4 X-linked                  | 11.486 | 6.35E-05   | 4.197  | 0.024433  | high-female - high-male; high-female - low-female; high-female - low-male; low-female - high-male; low-male - high-male; low-female - low-male | 6191      | 6191_at      | HGNC:10424 |
| 14 | IGSF6    | immunoglobulin superfamily member 6            | 11.143 | 7.86E-05   | 4.1046 | 0.028064  | high-male - high-female; high-female - low-female; low-male - high-female; high-male - low-female; low-male - high-male; low-male - low-female | 10261     | 10261_at     | HGNC:5953  |
| 15 | PUDP     | pseudouridine 5'-phosphatase                   | 10.257 | 0.00013839 | 3.8589 | 0.046119  | high-female - high-male; low-female - high-female; high-female - low-male; low-female - high-male; high-male - low-male; low-female - low-male | 8226      | 8226_at      | HGNC:16818 |

|    |          |                                                                     |        |            |        |          |                                                                                                                                                |       |          |            |
|----|----------|---------------------------------------------------------------------|--------|------------|--------|----------|------------------------------------------------------------------------------------------------------------------------------------------------|-------|----------|------------|
| 16 | PIM1     | Pim-1 proto-oncogene, serine/threonine kinase                       | 10.066 | 0.00015694 | 3.8043 | 0.049035 | high-female - high-male; low-female - high-female; high-female - low-male; low-female - high-male; high-male - low-male; low-female - low-male | 5292  | 5292_at  | HGNC:8986  |
| 17 | MLLT3    | MLLT3 super elongation complex subunit                              | 9.5336 | 0.00022402 | 3.6497 | 0.065874 | high-female - high-male; low-female - high-female; high-female - low-male; low-female - high-male; low-male - high-male; low-female - low-male | 4300  | 4300_at  | HGNC:7136  |
| 18 | SERPINB8 | serpin family B member 8                                            | 9.3304 | 0.0002573  | 3.5896 | 0.071459 | high-male - high-female; low-female - high-female; low-male - high-female; high-male - low-female; high-male - low-male; low-male - low-female | 5271  | 5271_at  | HGNC:8952  |
| 19 | CYP2S1   | cytochrome P450 family 2 subfamily S member 1                       | 9.2226 | 0.00027711 | 3.5573 | 0.072909 | high-male - high-female; high-female - low-female; low-male - high-female; high-male - low-female; high-male - low-male; low-male - low-female | 29785 | 29785_at | HGNC:15654 |
| 20 | SEPTIN6  | septin 6                                                            | 8.9577 | 0.00033309 | 3.4774 | 0.083255 | high-female - high-male; high-female - low-female; high-female - low-male; low-female - high-male; low-male - high-male; low-female - low-male | 23157 | 23157_at | HGNC:15848 |
| 21 | CA5B     | carbonic anhydrase 5B                                               | 8.3437 | 0.00051555 | 3.2877 | 0.11509  | high-female - high-male; low-female - high-female; high-female - low-male; low-female - high-male; low-male - high-male; low-female - low-male | 11238 | 11238_at | HGNC:1378  |
| 22 | ZRSR2    | zinc finger CCCH-type, RNA binding motif and serine/arginine rich 2 | 8.3057 | 0.00052994 | 3.2758 | 0.11509  | high-female - high-male; low-female - high-female; high-female - low-male; low-female - high-male; low-male - high-male; low-female - low-male | 8233  | 8233_at  | HGNC:23019 |
| 23 | PID1     | phosphotyrosine interaction domain containing 1                     | 8.2732 | 0.00054256 | 3.2656 | 0.11509  | high-male - high-female; high-female - low-female; low-male - high-female; high-male - low-female; high-male - low-male; low-male - low-female | 55022 | 55022_at | HGNC:26084 |

|    |        |                                                 |        |            |        |         |                                                                                                                                                |        |           |            |
|----|--------|-------------------------------------------------|--------|------------|--------|---------|------------------------------------------------------------------------------------------------------------------------------------------------|--------|-----------|------------|
| 24 | GASK1B | golgi associated kinase 1B                      | 8.2482 | 0.00055253 | 3.2576 | 0.11509 | high-male - high-female; low-female - high-female; low-male - high-female; high-male - low-female; high-male - low-male; low-male - low-female | 51313  | 51313_at  | HGNC:25312 |
| 25 | CLMN   | calmin                                          | 8.0551 | 0.00063635 | 3.1963 | 0.12261 | high-male - high-female; low-female - high-female; low-male - high-female; high-male - low-female; high-male - low-male; low-male - low-female | 79789  | 79789_at  | HGNC:19972 |
| 26 | SASH1  | SAM and SH3 domain containing 1                 | 8.0415 | 0.00064275 | 3.192  | 0.12261 | high-male - high-female; high-female - low-female; low-male - high-female; high-male - low-female; high-male - low-male; low-male - low-female | 23328  | 23328_at  | HGNC:19182 |
| 27 | HGSNAT | heparan-alpha-glucosaminide N-acetyltransferase | 7.9556 | 0.00068478 | 3.1645 | 0.12261 | high-male - high-female; high-female - low-female; low-male - high-female; high-male - low-female; high-male - low-male; low-male - low-female | 138050 | 138050_at | HGNC:26527 |
| 28 | USP18  | ubiquitin specific peptidase 18                 | 7.9518 | 0.00068675 | 3.1632 | 0.12261 | high-male - high-female; low-female - high-female; high-female - low-male; low-female - high-male; high-male - low-male; low-female - low-male | 11274  | 11274_at  | HGNC:12616 |
| 29 | RTN1   | reticulon 1                                     | 7.7284 | 0.00081099 | 3.091  | 0.13445 | high-male - high-female; high-female - low-female; low-male - high-female; high-male - low-female; high-male - low-male; low-male - low-female | 6252   | 6252_at   | HGNC:10467 |
| 30 | PCTP   | phosphatidylcholine transfer protein            | 7.7047 | 0.00082556 | 3.0833 | 0.13445 | high-male - high-female; high-female - low-female; low-male - high-female; high-male - low-female; high-male - low-male; low-male - low-female | 58488  | 58488_at  | HGNC:8752  |
| 31 | ICOS   | inducible T cell costimulator                   | 7.6395 | 0.00086698 | 3.062  | 0.13445 | high-female - high-male; low-female - high-female; high-female - low-male; low-female - high-male; high-male - low-male; low-female - low-male | 29851  | 29851_at  | HGNC:5351  |

|    |          |                                         |        |            |        |         |                                                                                                                                                |        |           |            |
|----|----------|-----------------------------------------|--------|------------|--------|---------|------------------------------------------------------------------------------------------------------------------------------------------------|--------|-----------|------------|
| 32 | SHTN1    | shootin 1                               | 7.6381 | 0.00086793 | 3.0615 | 0.13445 | high-male - high-female; high-female - low-female; low-male - high-female; high-male - low-female; low-male - high-male; low-male - low-female | 57698  | 57698_at  | HGNC:29319 |
| 33 | GLCCI1   | glucocorticoid induced 1                | 7.6084 | 0.00088756 | 3.0518 | 0.13445 | high-female - high-male; low-female - high-female; high-female - low-male; low-female - high-male; low-male - high-male; low-female - low-male | 113263 | 113263_at | HGNC:18713 |
| 34 | SLC36A4  | solute carrier family 36 member 4       | 7.4697 | 0.00098592 | 3.0062 | 0.14496 | high-male - high-female; low-female - high-female; low-male - high-female; high-male - low-female; high-male - low-male; low-male - low-female | 120103 | 120103_at | HGNC:19660 |
| 35 | TGFBI    | transforming growth factor beta induced | 7.398  | 0.0010413  | 2.9824 | 0.14503 | high-male - high-female; high-female - low-female; low-male - high-female; high-male - low-female; low-male - high-male; low-male - low-female | 7045   | 7045_at   | HGNC:11771 |
| 36 | DLEU1    | deleted in lymphocytic leukemia 1       | 7.3941 | 0.0010444  | 2.9811 | 0.14503 | high-female - high-male; low-female - high-female; high-female - low-male; low-female - high-male; high-male - low-male; low-female - low-male | 10301  | 10301_at  | HGNC:13747 |
| 37 | HNMT     | histamine N-methyltransferase           | 7.3311 | 0.001096   | 2.9602 | 0.14808 | high-male - high-female; high-female - low-female; low-male - high-female; high-male - low-female; high-male - low-male; low-male - low-female | 3176   | 3176_at   | HGNC:5028  |
| 38 | KIAA0930 | KIAA0930                                | 7.264  | 0.001154   | 2.9378 | 0.15181 | high-male - high-female; high-female - low-female; low-male - high-female; high-male - low-female; high-male - low-male; low-male - low-female | 23313  | 23313_at  | HGNC:1314  |
| 39 | HPSE     | heparanase                              | 7.0281 | 0.0013856  | 2.8584 | 0.17309 | high-male - high-female; low-female - high-female; low-male - high-female; high-male - low-female; high-male - low-male; low-male - low-female | 10855  | 10855_at  | HGNC:5164  |

|    |        |                                              |        |           |        |         |                                                                                                                                                |        |           |            |
|----|--------|----------------------------------------------|--------|-----------|--------|---------|------------------------------------------------------------------------------------------------------------------------------------------------|--------|-----------|------------|
| 40 | OASL   | 2'-5'-oligoadenylate synthetase like         | 7.0083 | 0.0014071 | 2.8517 | 0.17309 | high-female - high-male; low-female - high-female; high-female - low-male; low-female - high-male; high-male - low-male; low-female - low-male | 8638   | 8638_at   | HGNC:8090  |
| 41 | CREG1  | cellular repressor of E1A stimulated genes 1 | 6.9527 | 0.0014698 | 2.8328 | 0.17309 | high-male - high-female; low-female - high-female; low-male - high-female; high-male - low-female; high-male - low-male; low-male - low-female | 8804   | 8804_at   | HGNC:2351  |
| 42 | PRCP   | prolylcarboxypeptidase                       | 6.9266 | 0.0015002 | 2.8238 | 0.17309 | high-male - high-female; high-female - low-female; low-male - high-female; high-male - low-female; high-male - low-male; low-male - low-female | 5547   | 5547_at   | HGNC:9344  |
| 43 | FBXO5  | F-box protein 5                              | 6.8966 | 0.001536  | 2.8136 | 0.17309 | high-male - high-female; low-female - high-female; high-female - low-male; low-female - high-male; high-male - low-male; low-female - low-male | 26271  | 26271_at  | HGNC:13584 |
| 44 | PSMG1  | proteasome assembly chaperone 1              | 6.8841 | 0.0015512 | 2.8093 | 0.17309 | high-male - high-female; low-female - high-female; high-female - low-male; low-female - high-male; high-male - low-male; low-female - low-male | 8624   | 8624_at   | HGNC:3043  |
| 45 | ZNF799 | zinc finger protein 799                      | 6.8364 | 0.0016107 | 2.793  | 0.17309 | high-male - high-female; low-female - high-female; low-male - high-female; low-female - high-male; low-male - high-male; low-female - low-male | 90576  | 90576_at  | HGNC:28071 |
| 46 | DIPK1A | divergent protein kinase domain 1A           | 6.7809 | 0.001683  | 2.7739 | 0.17309 | high-female - high-male; low-female - high-female; high-female - low-male; low-female - high-male; high-male - low-male; low-female - low-male | 388650 | 388650_at | HGNC:32213 |
| 47 | ZNF138 | zinc finger protein 138                      | 6.779  | 0.0016855 | 2.7733 | 0.17309 | high-female - high-male; low-female - high-female; low-male - high-female; low-female - high-male; low-male - high-male; low-female - low-male | 7697   | 7697_at   | HGNC:12922 |

|    |          |                                                       |        |           |        |         |                                                                                                                                                |       |          |            |
|----|----------|-------------------------------------------------------|--------|-----------|--------|---------|------------------------------------------------------------------------------------------------------------------------------------------------|-------|----------|------------|
| 48 | PLXDC2   | plexin domain containing 2                            | 6.7789 | 0.0016856 | 2.7732 | 0.17309 | high-male - high-female; high-female - low-female; low-male - high-female; high-male - low-female; high-male - low-male; low-male - low-female | 84898 | 84898_at | HGNC:21013 |
| 49 | IGLV7-46 | immunoglobulin lambda variable 7-46 (gene/pseudogene) | 6.7707 | 0.0016966 | 2.7704 | 0.17309 | high-female - high-male; low-female - high-female; high-female - low-male; low-female - high-male; high-male - low-male; low-female - low-male | 28775 | 28775_at | HGNC:5930  |
| 50 | CISH     | cytokine inducible SH2 containing protein             | 6.6704 | 0.0018375 | 2.7358 | 0.18371 | high-female - high-male; high-female - low-female; high-female - low-male; low-female - high-male; high-male - low-male; low-female - low-male | 1154  | 1154_at  | HGNC:1984  |
| 51 | SCPEP1   | serine carboxypeptidase 1                             | 6.612  | 0.0019252 | 2.7155 | 0.18871 | high-male - high-female; low-female - high-female; low-male - high-female; high-male - low-female; high-male - low-male; low-male - low-female | 59342 | 59342_at | HGNC:29507 |
| 52 | LPIN2    | lipin 2                                               | 6.5798 | 0.0019755 | 2.7043 | 0.18892 | high-female - high-male; low-female - high-female; high-female - low-male; low-female - high-male; low-male - high-male; low-female - low-male | 9663  | 9663_at  | HGNC:14450 |
| 53 | CTSO     | cathepsin O                                           | 6.5059 | 0.0020966 | 2.6785 | 0.18892 | high-male - high-female; high-female - low-female; low-male - high-female; high-male - low-female; high-male - low-male; low-male - low-female | 1519  | 1519_at  | HGNC:2542  |
| 54 | EPB41L3  | erythrocyte membrane protein band 4.1 like 3          | 6.4998 | 0.0021069 | 2.6764 | 0.18892 | high-male - high-female; high-female - low-female; low-male - high-female; high-male - low-female; high-male - low-male; low-male - low-female | 23136 | 23136_at | HGNC:3380  |
| 55 | FCER1A   | Fc fragment of IgE receptor 1a                        | 6.4993 | 0.0021076 | 2.6762 | 0.18892 | high-male - high-female; low-female - high-female; low-male - high-female; high-male - low-female; low-male - high-male; low-male - low-female | 2205  | 2205_at  | HGNC:3609  |

|    |           |                                    |        |           |        |         |                                                                                                                                                |       |          |            |
|----|-----------|------------------------------------|--------|-----------|--------|---------|------------------------------------------------------------------------------------------------------------------------------------------------|-------|----------|------------|
| 56 | ZNF510    | zinc finger protein 510            | 6.4942 | 0.0021164 | 2.6744 | 0.18892 | high-female - high-male; low-female - high-female; low-male - high-female; low-female - high-male; low-male - high-male; low-female - low-male | 22869 | 22869_at | HGNC:29161 |
| 57 | CTTNBP2NL | CTTNBP2 N-terminal like            | 6.3215 | 0.0024343 | 2.6136 | 0.2131  | high-male - high-female; high-female - low-female; low-male - high-female; high-male - low-female; high-male - low-male; low-male - low-female | 55917 | 55917_at | HGNC:25330 |
| 58 | BCL2      | BCL2 apoptosis regulator           | 6.2957 | 0.002486  | 2.6045 | 0.2131  | high-female - high-male; low-female - high-female; high-female - low-male; low-female - high-male; high-male - low-male; low-female - low-male | 596   | 596_at   | HGNC:990   |
| 59 | LIPA      | lipase A, lysosomal acid type      | 6.2713 | 0.0025362 | 2.5958 | 0.2131  | high-male - high-female; high-female - low-female; high-female - low-male; high-male - low-female; high-male - low-male; low-male - low-female | 3988  | 3988_at  | HGNC:6617  |
| 60 | UBE2E2    | ubiquitin conjugating enzyme E2 E2 | 6.2381 | 0.0026059 | 2.584  | 0.2131  | high-male - high-female; high-female - low-female; low-male - high-female; high-male - low-female; high-male - low-male; low-male - low-female | 7325  | 7325_at  | HGNC:12478 |
| 61 | PLA2G4A   | phospholipase A2 group IVA         | 6.2281 | 0.0026273 | 2.5805 | 0.2131  | high-male - high-female; low-female - high-female; low-male - high-female; high-male - low-female; high-male - low-male; low-male - low-female | 5321  | 5321_at  | HGNC:9035  |
| 62 | THAP2     | THAP domain containing 2           | 6.2209 | 0.002643  | 2.5779 | 0.2131  | high-male - high-female; low-female - high-female; high-female - low-male; low-female - high-male; high-male - low-male; low-female - low-male | 83591 | 83591_at | HGNC:20854 |
| 63 | SLC2A9    | solute carrier family 2 member 9   | 6.0969 | 0.0029268 | 2.5336 | 0.23133 | high-male - high-female; low-female - high-female; low-male - high-female; high-male - low-female; high-male - low-male; low-male - low-female | 56606 | 56606_at | HGNC:13446 |



|    |         |                                     |        |           |        |         |                                                                                                                                                |        |           |            |
|----|---------|-------------------------------------|--------|-----------|--------|---------|------------------------------------------------------------------------------------------------------------------------------------------------|--------|-----------|------------|
| 64 | ZNF43   | zinc finger protein 43              | 6.0583 | 0.0030218 | 2.5197 | 0.23133 | high-male - high-female; low-female - high-female; low-male - high-female; low-female - high-male; low-male - high-male; low-female - low-male | 7594   | 7594_at   | HGNC:13109 |
| 65 | CD300LB | CD300 molecule like family member b | 6.0424 | 0.0030619 | 2.514  | 0.23133 | high-male - high-female; low-female - high-female; low-male - high-female; high-male - low-female; high-male - low-male; low-male - low-female | 124599 | 124599_at | HGNC:30811 |
| 66 | CPM     | carboxypeptidase M                  | 6.0253 | 0.0031056 | 2.5079 | 0.23133 | high-male - high-female; low-female - high-female; low-male - high-female; high-male - low-female; high-male - low-male; low-male - low-female | 1368   | 1368_at   | HGNC:2311  |
| 67 | SLC16A1 | solute carrier family 16 member 1   | 5.9995 | 0.0031728 | 2.4986 | 0.23133 | high-female - high-male; low-female - high-female; high-female - low-male; low-female - high-male; high-male - low-male; low-female - low-male | 6566   | 6566_at   | HGNC:10922 |
| 68 | GPR15   | G protein-coupled receptor 15       | 5.994  | 0.0031874 | 2.4966 | 0.23133 | high-male - high-female; high-female - low-female; low-male - high-female; high-male - low-female; high-male - low-male; low-male - low-female | 2838   | 2838_at   | HGNC:4469  |
| 69 | TMEM68  | transmembrane protein 68            | 5.9919 | 0.003193  | 2.4958 | 0.23133 | high-male - high-female; low-female - high-female; low-male - high-female; low-female - high-male; high-male - low-male; low-female - low-male | 137695 | 137695_at | HGNC:26510 |
| 70 | ZNF749  | zinc finger protein 749             | 5.9472 | 0.0033141 | 2.4796 | 0.23439 | high-male - high-female; low-female - high-female; high-female - low-male; low-female - high-male; high-male - low-male; low-female - low-male | 388567 | 388567_at | HGNC:32783 |
| 71 | SMAD5   | SMAD family member 5                | 5.9418 | 0.0033289 | 2.4777 | 0.23439 | high-male - high-female; low-female - high-female; low-male - high-female; high-male - low-female; low-male - high-male; low-male - low-female | 4090   | 4090_at   | HGNC:6771  |

|    |          |                                                              |        |           |        |         |                                                                                                                                                |        |           |            |
|----|----------|--------------------------------------------------------------|--------|-----------|--------|---------|------------------------------------------------------------------------------------------------------------------------------------------------|--------|-----------|------------|
| 72 | DPP4     | dipeptidyl peptidase 4                                       | 5.9153 | 0.0034037 | 2.4681 | 0.23632 | high-female - high-male; high-female - low-female; high-female - low-male; low-female - high-male; low-male - high-male; low-female - low-male | 1803   | 1803_at   | HGNC:3009  |
| 73 | CDC14A   | cell division cycle 14A                                      | 5.8916 | 0.0034718 | 2.4594 | 0.23775 | high-female - high-male; high-female - low-female; high-female - low-male; low-female - high-male; low-male - high-male; low-male - low-female | 8556   | 8556_at   | HGNC:1718  |
| 74 | IGLV9-49 | immunoglobulin lambda variable 9-49                          | 5.8099 | 0.0037181 | 2.4297 | 0.25117 | high-male - high-female; low-female - high-female; high-female - low-male; low-female - high-male; high-male - low-male; low-female - low-male | 28773  | 28773_at  | HGNC:5933  |
| 75 | PLEKHF2  | pleckstrin homology and FYVE domain containing 2             | 5.7447 | 0.0039281 | 2.4058 | 0.26182 | high-male - high-female; low-female - high-female; low-male - high-female; low-female - high-male; high-male - low-male; low-female - low-male | 79666  | 79666_at  | HGNC:20757 |
| 76 | LAX1     | lymphocyte transmembrane adaptor 1                           | 5.6937 | 0.004101  | 2.3871 | 0.26229 | high-female - high-male; low-female - high-female; high-female - low-male; low-female - high-male; low-male - high-male; low-female - low-male | 54900  | 54900_at  | HGNC:26005 |
| 77 | LDLRAD3  | low density lipoprotein receptor class A domain containing 3 | 5.6915 | 0.0041087 | 2.3863 | 0.26229 | high-male - high-female; high-female - low-female; low-male - high-female; high-male - low-female; high-male - low-male; low-male - low-female | 143458 | 143458_at | HGNC:27046 |
| 78 | CPVL     | carboxypeptidase vitellogenic like                           | 5.6907 | 0.0041116 | 2.386  | 0.26229 | high-male - high-female; high-female - low-female; low-male - high-female; high-male - low-female; high-male - low-male; low-male - low-female | 54504  | 54504_at  | HGNC:14399 |
| 79 | ZNF230   | zinc finger protein 230                                      | 5.6812 | 0.004145  | 2.3825 | 0.26229 | high-male - high-female; low-female - high-female; low-male - high-female; low-female - high-male; high-male - low-male; low-female - low-male | 7773   | 7773_at   | HGNC:13024 |

|    |           |                                               |        |           |        |         |                                                                                                                                                |        |           |            |
|----|-----------|-----------------------------------------------|--------|-----------|--------|---------|------------------------------------------------------------------------------------------------------------------------------------------------|--------|-----------|------------|
| 80 | IRF8      | interferon regulatory factor 8                | 5.6625 | 0.004211  | 2.3756 | 0.26314 | high-male - high-female; low-female - high-female; low-male - high-female; high-male - low-female; low-male - high-male; low-male - low-female | 3394   | 3394_at   | HGNC:5358  |
| 81 | STS       | steroid sulfatase                             | 5.6381 | 0.0042992 | 2.3666 | 0.26533 | high-female - high-male; low-female - high-female; high-female - low-male; low-female - high-male; high-male - low-male; low-female - low-male | 412    | 412_at    | HGNC:11425 |
| 82 | NIPSNAP3B | nipsnap homolog 3B                            | 5.6102 | 0.0044027 | 2.3563 | 0.26537 | high-male - high-female; low-female - high-female; low-male - high-female; low-female - high-male; low-male - high-male; low-male - low-female | 55335  | 55335_at  | HGNC:23641 |
| 83 | LY6E      | lymphocyte antigen 6 family member E          | 5.5775 | 0.004527  | 2.3442 | 0.26537 | high-male - high-female; low-female - high-female; high-female - low-male; high-male - low-female; high-male - low-male; low-female - low-male | 4061   | 4061_at   | HGNC:6727  |
| 84 | SLC37A2   | solute carrier family 37 member 2             | 5.5731 | 0.004544  | 2.3426 | 0.26537 | high-male - high-female; low-female - high-female; low-male - high-female; high-male - low-female; high-male - low-male; low-female - low-male | 219855 | 219855_at | HGNC:20644 |
| 85 | DTX1      | deltex E3 ubiquitin ligase 1                  | 5.5519 | 0.0046272 | 2.3347 | 0.26537 | high-male - high-female; low-female - high-female; low-male - high-female; low-female - high-male; low-male - high-male; low-female - low-male | 1840   | 1840_at   | HGNC:3060  |
| 86 | PKIG      | cAMP-dependent protein kinase inhibitor gamma | 5.5474 | 0.0046451 | 2.333  | 0.26537 | high-male - high-female; low-female - high-female; high-female - low-male; low-female - high-male; high-male - low-male; low-female - low-male | 11142  | 11142_at  | HGNC:9019  |
| 87 | RAB31     | RAB31, member RAS oncogene family             | 5.5301 | 0.0047144 | 2.3266 | 0.26537 | high-male - high-female; high-female - low-female; low-male - high-female; high-male - low-female; high-male - low-male; low-male - low-female | 11031  | 11031_at  | HGNC:9771  |

|    |         |                                                      |        |           |        |         |                                                                                                                                                |       |          |            |
|----|---------|------------------------------------------------------|--------|-----------|--------|---------|------------------------------------------------------------------------------------------------------------------------------------------------|-------|----------|------------|
| 88 | TNFSF13 | TNF superfamily member 13                            | 5.5232 | 0.0047423 | 2.324  | 0.26537 | high-male - high-female; low-female - high-female; low-male - high-female; high-male - low-female; high-male - low-male; low-male - low-female | 8741  | 8741_at  | HGNC:11928 |
| 89 | HLA-DMA | major histocompatibility complex, class II, DM alpha | 5.5192 | 0.0047586 | 2.3225 | 0.26537 | high-male - high-female; high-female - low-female; low-male - high-female; high-male - low-female; high-male - low-male; low-male - low-female | 3108  | 3108_at  | HGNC:4934  |
| 90 | CEBPG   | CCAAT enhancer binding protein gamma                 | 5.5145 | 0.0047776 | 2.3208 | 0.26537 | high-male - high-female; low-female - high-female; low-male - high-female; high-male - low-female; high-male - low-male; low-male - low-female | 1054  | 1054_at  | HGNC:1837  |
| 91 | OPN3    | opsin 3                                              | 5.4903 | 0.0048778 | 2.3118 | 0.26765 | high-male - high-female; low-female - high-female; low-male - high-female; high-male - low-female; high-male - low-male; low-female - low-male | 23596 | 23596_at | HGNC:14007 |
| 92 | FCER1G  | Fc fragment of IgE receptor Ig                       | 5.4693 | 0.0049666 | 2.3039 | 0.26765 | high-female - high-male; high-female - low-female; high-female - low-male; high-male - low-female; high-male - low-male; low-male - low-female | 2207  | 2207_at  | HGNC:3611  |
| 93 | MSH2    | mutS homolog 2                                       | 5.4539 | 0.0050327 | 2.2982 | 0.26765 | high-male - high-female; low-female - high-female; low-male - high-female; low-female - high-male; high-male - low-male; low-female - low-male | 4436  | 4436_at  | HGNC:7325  |
| 94 | ANKRD50 | ankyrin repeat domain 50                             | 5.4539 | 0.0050328 | 2.2982 | 0.26765 | high-male - high-female; low-female - high-female; low-male - high-female; high-male - low-female; high-male - low-male; low-male - low-female | 57182 | 57182_at | HGNC:29223 |
| 95 | TSHZ3   | teashirt zinc finger homeobox 3                      | 5.4043 | 0.0052525 | 2.2796 | 0.27111 | high-male - high-female; high-female - low-female; low-male - high-female; high-male - low-female; high-male - low-male; low-male - low-female | 57616 | 57616_at | HGNC:30700 |

|     |         |                                               |        |           |        |         |                                                                                                                                                |       |          |            |
|-----|---------|-----------------------------------------------|--------|-----------|--------|---------|------------------------------------------------------------------------------------------------------------------------------------------------|-------|----------|------------|
| 96  | FAR1    | fatty acyl-CoA reductase 1                    | 5.399  | 0.0052768 | 2.2776 | 0.27111 | high-male - high-female; low-female - high-female; low-male - high-female; high-male - low-female; high-male - low-male; low-male - low-female | 84188 | 84188_at | HGNC:26222 |
| 97  | ZNF649  | zinc finger protein 649                       | 5.3921 | 0.0053084 | 2.275  | 0.27111 | high-female - high-male; low-female - high-female; low-male - high-female; low-male - high-male; low-female - low-male                         | 65251 | 65251_at | HGNC:25741 |
| 98  | TMEM156 | transmembrane protein 156                     | 5.3803 | 0.0053625 | 2.2706 | 0.27111 | high-female - high-male; low-female - high-female; low-male - high-female; low-male - high-male; low-female - low-male                         | 80008 | 80008_at | HGNC:26260 |
| 99  | METTL18 | methyltransferase like 18                     | 5.3789 | 0.005369  | 2.2701 | 0.27111 | high-male - high-female; low-female - high-female; low-male - high-female; low-female - high-male; low-male - high-male; low-female - low-male | 92342 | 92342_at | HGNC:28793 |
| 100 | MT1H    | metallothionein 1H                            | 5.3582 | 0.0054662 | 2.2623 | 0.27219 | high-male - high-female; high-female - low-female; high-female - low-male; high-male - low-female; high-male - low-male; low-female - low-male | 4496  | 4496_at  | HGNC:7400  |
| 101 | MS4A6A  | membrane spanning 4-domains A6A               | 5.3456 | 0.0055261 | 2.2576 | 0.27219 | high-male - high-female; high-female - low-female; low-male - high-female; high-male - low-female; high-male - low-male; low-male - low-female | 64231 | 64231_at | HGNC:13375 |
| 102 | IDH1    | isocitrate dehydrogenase (NADP(+)) 1          | 5.3398 | 0.0055538 | 2.2554 | 0.27219 | high-male - high-female; low-female - high-female; low-male - high-female; high-male - low-female; high-male - low-male; low-male - low-female | 3417  | 3417_at  | HGNC:5382  |
| 103 | PIM2    | Pim-2 proto-oncogene, serine/threonine kinase | 5.3236 | 0.0056325 | 2.2493 | 0.27319 | high-female - high-male; high-female - low-female; high-female - low-male; low-female - high-male; high-male - low-male; low-female - low-male | 11040 | 11040_at | HGNC:8987  |

|     |          |                                                                    |        |           |        |         |                                                                                                                                                |       |          |            |
|-----|----------|--------------------------------------------------------------------|--------|-----------|--------|---------|------------------------------------------------------------------------------------------------------------------------------------------------|-------|----------|------------|
| 104 | HLA-DPB2 | major histocompatibility complex, class II, DP beta 2 (pseudogene) | 5.3079 | 0.0057098 | 2.2434 | 0.27319 | high-male - high-female; high-female - low-female; low-male - high-female; high-male - low-female; high-male - low-male; low-male - low-female | 3116  | 3116_at  | HGNC:4941  |
| 105 | GIN52    | GIN5 complex subunit 2                                             | 5.2944 | 0.0057773 | 2.2383 | 0.27319 | high-male - high-female; low-female - high-female; high-female - low-male; low-female - high-male; high-male - low-male; low-female - low-male | 51659 | 51659_at | HGNC:24575 |
| 106 | MPZL2    | myelin protein zero like 2                                         | 5.269  | 0.0059063 | 2.2287 | 0.27319 | high-male - high-female; low-female - high-female; low-male - high-female; high-male - low-female; high-male - low-male; low-male - low-female | 10205 | 10205_at | HGNC:3496  |
| 107 | C3orf14  | chromosome 3 open reading frame 14                                 | 5.2649 | 0.0059272 | 2.2271 | 0.27319 | high-male - high-female; high-female - low-female; low-male - high-female; high-male - low-female; high-male - low-male; low-male - low-female | 57415 | 57415_at | HGNC:25024 |
| 108 | NAPRT    | nicotinate phosphoribosyltransferase                               | 5.2437 | 0.0060377 | 2.2191 | 0.27319 | high-male - high-female; low-female - high-female; low-male - high-female; high-male - low-female; high-male - low-male; low-male - low-female | 93100 | 93100_at | HGNC:30450 |
| 109 | EEF2K    | eukaryotic elongation factor 2 kinase                              | 5.2435 | 0.0060388 | 2.219  | 0.27319 | high-male - high-female; low-female - high-female; low-male - high-female; low-female - high-male; low-male - high-male; low-male - low-female | 29904 | 29904_at | HGNC:24615 |
| 110 | LMBR1    | limb development membrane protein 1                                | 5.2415 | 0.0060494 | 2.2183 | 0.27319 | high-male - high-female; low-female - high-female; low-male - high-female; low-female - high-male; low-male - high-male; low-male - low-female | 64327 | 64327_at | HGNC:13243 |
| 111 | RIOK2    | RIO kinase 2                                                       | 5.2383 | 0.0060659 | 2.2171 | 0.27319 | high-male - high-female; low-female - high-female; low-male - high-female; low-female - high-male; high-male - low-male; low-female - low-male | 55781 | 55781_at | HGNC:18999 |

|     |         |                                                           |        |           |        |         |                                                                                                                                                |        |           |            |
|-----|---------|-----------------------------------------------------------|--------|-----------|--------|---------|------------------------------------------------------------------------------------------------------------------------------------------------|--------|-----------|------------|
| 112 | OXSM    | 3-oxoacyl-ACP synthase, mitochondrial                     | 5.2031 | 0.0062555 | 2.2037 | 0.2786  | high-male - high-female; low-female - high-female; high-female - low-male; low-female - high-male; high-male - low-male; low-female - low-male | 54995  | 54995_at  | HGNC:26063 |
| 113 | SERTAD3 | SERTA domain containing 3                                 | 5.1927 | 0.0063124 | 2.1998 | 0.2786  | high-male - high-female; low-female - high-female; low-male - high-female; high-male - low-female; high-male - low-male; low-male - low-female | 29946  | 29946_at  | HGNC:17931 |
| 114 | SMIM3   | small integral membrane protein 3                         | 5.1828 | 0.0063677 | 2.196  | 0.2786  | high-male - high-female; high-female - low-female; high-female - low-male; high-male - low-female; high-male - low-male; low-male - low-female | 85027  | 85027_at  | HGNC:30248 |
| 115 | SLC44A1 | solute carrier family 44 member 1                         | 5.1754 | 0.0064091 | 2.1932 | 0.2786  | high-male - high-female; low-female - high-female; low-male - high-female; high-male - low-female; high-male - low-male; low-male - low-female | 23446  | 23446_at  | HGNC:18798 |
| 116 | SETD7   | SET domain containing 7, histone lysine methyltransferase | 5.1554 | 0.0065225 | 2.1856 | 0.27903 | high-male - high-female; low-female - high-female; low-male - high-female; high-male - low-female; low-male - high-male; low-male - low-female | 80854  | 80854_at  | HGNC:30412 |
| 117 | ZNF440  | zinc finger protein 440                                   | 5.1473 | 0.0065689 | 2.1825 | 0.27903 | high-male - high-female; low-female - high-female; low-male - high-female; low-female - high-male; low-male - high-male; low-female - low-male | 126070 | 126070_at | HGNC:20874 |
| 118 | BACE2   | beta-secretase 2                                          | 5.1443 | 0.0065864 | 2.1814 | 0.27903 | high-male - high-female; low-female - high-female; low-male - high-female; low-female - high-male; low-male - high-male; low-female - low-male | 25825  | 25825_at  | HGNC:934   |
| 119 | MT1X    | metallothionein 1X                                        | 5.1107 | 0.0067836 | 2.1685 | 0.28497 | high-female - high-male; high-female - low-female; high-female - low-male; high-male - low-female; high-male - low-male; low-female - low-male | 4501   | 4501_at   | HGNC:7405  |

|     |           |                                                   |        |           |        |         |                                                                                                                                                |        |           |            |
|-----|-----------|---------------------------------------------------|--------|-----------|--------|---------|------------------------------------------------------------------------------------------------------------------------------------------------|--------|-----------|------------|
| 120 | CCDC144NL | CCDC144A N-terminal pseudogene                    | 5.0926 | 0.0068925 | 2.1616 | 0.28711 | high-female - high-male; low-female - high-female; low-male - high-female; low-female - high-male; low-male - high-male; low-male - low-female | 339184 | 339184_at | HGNC:33735 |
| 121 | RDX       | radixin                                           | 5.0832 | 0.0069494 | 2.1581 | 0.28711 | high-male - high-female; low-female - high-female; low-male - high-female; high-male - low-female; high-male - low-male; low-female - low-male | 5962   | 5962_at   | HGNC:9944  |
| 122 | RAB34     | RAB34, member RAS oncogene family                 | 5.0261 | 0.0073085 | 2.1362 | 0.29646 | high-male - high-female; low-female - high-female; low-male - high-female; high-male - low-female; high-male - low-male; low-male - low-female | 83871  | 83871_at  | HGNC:16519 |
| 123 | LARP4     | La ribonucleoprotein 4                            | 5.0038 | 0.0074544 | 2.1276 | 0.29646 | high-male - high-female; low-female - high-female; low-male - high-female; low-female - high-male; high-male - low-male; low-female - low-male | 113251 | 113251_at | HGNC:24320 |
| 124 | SYAP1     | synapse associated protein 1                      | 4.997  | 0.0074991 | 2.125  | 0.29646 | high-female - high-male; low-female - high-female; high-female - low-male; low-female - high-male; high-male - low-male; low-female - low-male | 94056  | 94056_at  | HGNC:16273 |
| 125 | SLC31A1   | solute carrier family 31 member 1                 | 4.9761 | 0.0076394 | 2.1169 | 0.29646 | high-male - high-female; high-female - low-female; low-male - high-female; high-male - low-female; high-male - low-male; low-male - low-female | 1317   | 1317_at   | HGNC:11016 |
| 126 | SUDS3     | SDS3 homolog, SIN3A corepressor complex component | 4.9706 | 0.0076771 | 2.1148 | 0.29646 | high-male - high-female; low-female - high-female; low-male - high-female; low-female - high-male; low-male - high-male; low-female - low-male | 64426  | 64426_at  | HGNC:29545 |
| 127 | CKS2      | CDC28 protein kinase regulatory subunit 2         | 4.9632 | 0.0077272 | 2.112  | 0.29646 | high-male - high-female; low-female - high-female; high-female - low-male; low-female - high-male; high-male - low-male; low-female - low-male | 1164   | 1164_at   | HGNC:2000  |



|     |         |                                                        |        |           |        |         |                                                                                                                                                |        |           |            |
|-----|---------|--------------------------------------------------------|--------|-----------|--------|---------|------------------------------------------------------------------------------------------------------------------------------------------------|--------|-----------|------------|
| 128 | GLCE    | glucuronic acid epimerase                              | 4.9561 | 0.0077763 | 2.1092 | 0.29646 | high-male - high-female; low-female - high-female; low-male - high-female; high-male - low-female; high-male - low-male; low-male - low-female | 26035  | 26035_at  | HGNC:17855 |
| 129 | RBM3    | RNA binding motif protein 3                            | 4.9558 | 0.0077781 | 2.1091 | 0.29646 | high-male - high-female; high-female - low-female; low-male - high-female; high-male - low-female; high-male - low-male; low-male - low-female | 5935   | 5935_at   | HGNC:9900  |
| 130 | CCDC88A | coiled-coil domain containing 88A                      | 4.9531 | 0.0077971 | 2.1081 | 0.29646 | high-male - high-female; high-female - low-female; low-male - high-female; high-male - low-female; low-male - high-male; low-male - low-female | 55704  | 55704_at  | HGNC:25523 |
| 131 | LRIG1   | leucine rich repeats and immunoglobulin like domains 1 | 4.9523 | 0.0078025 | 2.1078 | 0.29646 | high-female - high-male; low-female - high-female; low-male - high-female; low-female - high-male; low-male - high-male; low-female - low-male | 26018  | 26018_at  | HGNC:17360 |
| 132 | TAS2R20 | taste 2 receptor member 20                             | 4.9486 | 0.0078282 | 2.1063 | 0.29646 | high-female - high-male; low-female - high-female; low-male - high-female; low-female - high-male; low-male - high-male; low-male - low-female | 259295 | 259295_at | HGNC:19109 |
| 133 | BANF1   | BAF nuclear assembly factor 1                          | 4.931  | 0.0079521 | 2.0995 | 0.29889 | high-male - high-female; low-female - high-female; low-male - high-female; high-male - low-female; high-male - low-male; low-female - low-male | 8815   | 8815_at   | HGNC:17397 |
| 134 | CDK6    | cyclin dependent kinase 6                              | 4.921  | 0.0080227 | 2.0957 | 0.2993  | high-female - high-male; high-female - low-female; high-female - low-male; low-female - high-male; high-male - low-male; low-female - low-male | 1021   | 1021_at   | HGNC:1777  |
| 135 | FOLR3   | folate receptor gamma                                  | 4.9035 | 0.0081488 | 2.0889 | 0.30073 | high-male - high-female; high-female - low-female; low-male - high-female; high-male - low-female; high-male - low-male; low-male - low-female | 2352   | 2352_at   | HGNC:3795  |

|     |          |                                        |        |           |        |         |                                                                                                                                                |        |           |            |
|-----|----------|----------------------------------------|--------|-----------|--------|---------|------------------------------------------------------------------------------------------------------------------------------------------------|--------|-----------|------------|
| 136 | FEM1B    | fem-1 homolog B                        | 4.899  | 0.0081816 | 2.0872 | 0.30073 | high-male - high-female; low-female - high-female; low-male - high-female; high-male - low-female; high-male - low-male; low-female - low-male | 10116  | 10116_at  | HGNC:3649  |
| 137 | SNORD38B | small nucleolar RNA, C/D box 38B       | 4.8817 | 0.0083085 | 2.0805 | 0.30317 | high-male - high-female; low-female - high-female; low-male - high-female; low-female - high-male; high-male - low-male; low-female - low-male | 94163  | 94163_at  | HGNC:30356 |
| 138 | ZNF844   | zinc finger protein 844                | 4.8388 | 0.0086336 | 2.0638 | 0.31175 | high-female - high-male; low-female - high-female; low-male - high-female; low-female - high-male; low-male - high-male; low-female - low-male | 284391 | 284391_at | HGNC:25932 |
| 139 | ZNF141   | zinc finger protein 141                | 4.8323 | 0.0086839 | 2.0613 | 0.31175 | high-female - high-male; low-female - high-female; low-male - high-female; low-female - high-male; low-male - high-male; low-female - low-male | 7700   | 7700_at   | HGNC:12926 |
| 140 | SNORD47  | small nucleolar RNA, C/D box 47        | 4.8263 | 0.0087308 | 2.0589 | 0.31175 | high-male - high-female; low-female - high-female; high-female - low-male; low-female - high-male; high-male - low-male; low-female - low-male | 26802  | 26802_at  | HGNC:10187 |
| 141 | MGST1    | microsomal glutathione S-transferase 1 | 4.8014 | 0.0089274 | 2.0493 | 0.3136  | high-male - high-female; high-female - low-female; low-male - high-female; high-male - low-female; high-male - low-male; low-male - low-female | 4257   | 4257_at   | HGNC:7061  |
| 142 | ZBED1    | zinc finger BED-type containing 1      | 4.7987 | 0.0089496 | 2.0482 | 0.3136  | high-male - high-female; low-female - high-female; low-male - high-female; high-male - low-female; high-male - low-male; low-female - low-male | 9189   | 9189_at   | HGNC:447   |
| 143 | CCDC149  | coiled-coil domain containing 149      | 4.796  | 0.0089708 | 2.0472 | 0.3136  | high-male - high-female; low-female - high-female; low-male - high-female; high-male - low-female; high-male - low-male; low-female - low-male | 91050  | 91050_at  | HGNC:25405 |

|     |          |                                                       |        |           |        |         |                                                                                                                                                |        |           |            |
|-----|----------|-------------------------------------------------------|--------|-----------|--------|---------|------------------------------------------------------------------------------------------------------------------------------------------------|--------|-----------|------------|
| 144 | PLA2G15  | phospholipase A2 group XV                             | 4.7875 | 0.0090401 | 2.0438 | 0.31383 | high-male - high-female; low-female - high-female; low-male - high-female; high-male - low-female; high-male - low-male; low-male - low-female | 23659  | 23659_at  | HGNC:17163 |
| 145 | ZBTB25   | zinc finger and BTB domain containing 25              | 4.723  | 0.0095799 | 2.0186 | 0.32916 | high-female - high-male; low-female - high-female; low-male - high-female; low-female - high-male; low-male - high-male; low-male - low-female | 7597   | 7597_at   | HGNC:13112 |
| 146 | RHOH     | ras homolog family member H                           | 4.7191 | 0.0096134 | 2.0171 | 0.32916 | high-female - high-male; low-female - high-female; high-female - low-male; low-female - high-male; high-male - low-male; low-female - low-male | 399    | 399_at    | HGNC:686   |
| 147 | LACC1    | laccase domain containing 1                           | 4.6737 | 0.010016  | 1.9993 | 0.34062 | high-male - high-female; high-female - low-female; low-male - high-female; high-male - low-female; low-male - high-male; low-male - low-female | 144811 | 144811_at | HGNC:26789 |
| 148 | ABHD10   | abhydrolase domain containing 10                      | 4.6241 | 0.010476  | 1.9798 | 0.35107 | high-male - high-female; low-female - high-female; low-male - high-female; low-female - high-male; high-male - low-male; low-female - low-male | 55347  | 55347_at  | HGNC:25656 |
| 149 | SNAI3    | snail family transcriptional repressor 3              | 4.62   | 0.010515  | 1.9782 | 0.35107 | high-male - high-female; low-female - high-female; low-male - high-female; high-male - low-female; high-male - low-male; low-male - low-female | 333929 | 333929_at | HGNC:18411 |
| 150 | MYPOP    | Myb related transcription factor, partner of profilin | 4.6144 | 0.010569  | 1.976  | 0.35107 | high-male - high-female; high-female - low-female; low-male - high-female; high-male - low-female; high-male - low-male; low-male - low-female | 339344 | 339344_at | HGNC:20178 |
| 151 | TRAPPC2L | trafficking protein particle complex 2 like           | 4.5863 | 0.010842  | 1.9649 | 0.35107 | high-male - high-female; low-female - high-female; high-female - low-male; low-female - high-male; high-male - low-male; low-female - low-male | 51693  | 51693_at  | HGNC:30887 |

|     |         |                                             |        |          |        |         |                                                                                                                                                |        |           |            |
|-----|---------|---------------------------------------------|--------|----------|--------|---------|------------------------------------------------------------------------------------------------------------------------------------------------|--------|-----------|------------|
| 152 | ITSN1   | intersectin 1                               | 4.5774 | 0.01093  | 1.9614 | 0.35107 | high-male - high-female; low-female - high-female; low-male - high-female; high-male - low-female; high-male - low-male; low-male - low-female | 6453   | 6453_at   | HGNC:6183  |
| 153 | MAN2B1  | mannosidase alpha class 2B member 1         | 4.5772 | 0.010932 | 1.9613 | 0.35107 | high-male - high-female; high-female - low-female; low-male - high-female; high-male - low-female; high-male - low-male; low-male - low-female | 4125   | 4125_at   | HGNC:6826  |
| 154 | MORN2   | MORN repeat containing 2                    | 4.562  | 0.011085 | 1.9553 | 0.35107 | high-male - high-female; high-female - low-female; low-male - high-female; high-male - low-female; high-male - low-male; low-male - low-female | 729967 | 729967_at | HGNC:30166 |
| 155 | SLC43A3 | solute carrier family 43 member 3           | 4.5618 | 0.011087 | 1.9552 | 0.35107 | high-male - high-female; high-female - low-female; low-male - high-female; high-male - low-female; high-male - low-male; low-male - low-female | 29015  | 29015_at  | HGNC:17466 |
| 156 | CXCL16  | C-X-C motif chemokine ligand 16             | 4.5572 | 0.011133 | 1.9534 | 0.35107 | high-male - high-female; high-female - low-female; low-male - high-female; high-male - low-female; high-male - low-male; low-male - low-female | 58191  | 58191_at  | HGNC:16642 |
| 157 | CFD     | complement factor D                         | 4.5536 | 0.01117  | 1.952  | 0.35107 | high-male - high-female; high-female - low-female; low-male - high-female; high-male - low-female; high-male - low-male; low-male - low-female | 1675   | 1675_at   | HGNC:2771  |
| 158 | CRIM1   | cysteine rich transmembrane BMP regulator 1 | 4.5465 | 0.011243 | 1.9491 | 0.35107 | high-female - high-male; low-female - high-female; high-female - low-male; low-female - high-male; low-male - high-male; low-female - low-male | 51232  | 51232_at  | HGNC:2359  |
| 159 | SNX25   | sorting nexin 25                            | 4.5425 | 0.011283 | 1.9476 | 0.35107 | high-female - high-male; low-female - high-female; low-male - high-female; low-female - high-male; low-male - high-male; low-female - low-male | 83891  | 83891_at  | HGNC:21883 |

|     |         |                                                      |        |          |        |         |                                                                                                                                                |        |           |            |
|-----|---------|------------------------------------------------------|--------|----------|--------|---------|------------------------------------------------------------------------------------------------------------------------------------------------|--------|-----------|------------|
| 160 | GNG5    | G protein subunit gamma 5                            | 4.5422 | 0.011287 | 1.9474 | 0.35107 | high-male - high-female; high-female - low-female; low-male - high-female; high-male - low-female; high-male - low-male; low-male - low-female | 2787   | 2787_at   | HGNC:4408  |
| 161 | GVINP1  | GTPase, very large interferon inducible pseudogene 1 | 4.5357 | 0.011354 | 1.9448 | 0.35107 | high-female - high-male; low-female - high-female; high-female - low-male; low-female - high-male; low-male - high-male; low-female - low-male | 387751 | 387751_at | HGNC:25813 |
| 162 | H4C9    | H4 clustered histone 9                               | 4.5283 | 0.011431 | 1.9419 | 0.35107 | high-female - high-male; low-female - high-female; high-female - low-male; low-female - high-male; high-male - low-male; low-female - low-male | 8294   | 8294_at   | HGNC:4793  |
| 163 | TBXAS1  | thromboxane A synthase 1                             | 4.5267 | 0.011447 | 1.9413 | 0.35107 | high-male - high-female; high-female - low-female; low-male - high-female; high-male - low-female; high-male - low-male; low-male - low-female | 6916   | 6916_at   | HGNC:11609 |
| 164 | SLC30A1 | solute carrier family 30 member 1                    | 4.4948 | 0.011787 | 1.9286 | 0.35927 | high-male - high-female; low-female - high-female; low-male - high-female; high-male - low-female; high-male - low-male; low-female - low-male | 7779   | 7779_at   | HGNC:11012 |
| 165 | TRAV19  | T cell receptor alpha variable 19                    | 4.4879 | 0.011861 | 1.9259 | 0.35936 | high-female - high-male; high-female - low-female; high-female - low-male; low-female - high-male; low-male - high-male; low-female - low-male | 28664  | 28664_at  | HGNC:12115 |
| 166 | GPX7    | glutathione peroxidase 7                             | 4.4757 | 0.011994 | 1.921  | 0.3612  | high-female - high-male; low-female - high-female; high-female - low-male; low-female - high-male; high-male - low-male; low-female - low-male | 2882   | 2882_at   | HGNC:4559  |
| 167 | CIAPIN1 | cytokine induced apoptosis inhibitor 1               | 4.4415 | 0.012377 | 1.9074 | 0.36622 | high-male - high-female; low-female - high-female; high-female - low-male; low-female - high-male; high-male - low-male; low-female - low-male | 57019  | 57019_at  | HGNC:28050 |

|     |         |                                                  |        |          |        |         |                                                                                                                                                |        |           |            |
|-----|---------|--------------------------------------------------|--------|----------|--------|---------|------------------------------------------------------------------------------------------------------------------------------------------------|--------|-----------|------------|
| 168 | CD99L2  | CD99 molecule like 2                             | 4.4347 | 0.012454 | 1.9047 | 0.36622 | high-male - high-female; high-female - low-female; low-male - high-female; high-male - low-female; high-male - low-male; low-male - low-female | 83692  | 83692_at  | HGNC:18237 |
| 169 | IRAK3   | interleukin 1 receptor associated kinase 3       | 4.4316 | 0.01249  | 1.9034 | 0.36622 | high-male - high-female; high-female - low-female; low-male - high-female; high-male - low-female; high-male - low-male; low-male - low-female | 11213  | 11213_at  | HGNC:17020 |
| 170 | HNRNPA0 | heterogeneous nuclear ribonucleoprotein A0       | 4.4275 | 0.012537 | 1.9018 | 0.36622 | high-male - high-female; low-female - high-female; low-male - high-female; high-male - low-female; high-male - low-male; low-female - low-male | 10949  | 10949_at  | HGNC:5030  |
| 171 | FAH     | fumarylacetoacetate hydrolase                    | 4.4249 | 0.012566 | 1.9008 | 0.36622 | high-male - high-female; low-female - high-female; low-male - high-female; high-male - low-female; high-male - low-male; low-male - low-female | 2184   | 2184_at   | HGNC:3579  |
| 172 | ENTPD1  | ectonucleoside triphosphate diphosphohydrolase 1 | 4.422  | 0.0126   | 1.8996 | 0.36622 | high-male - high-female; high-female - low-female; low-male - high-female; high-male - low-female; high-male - low-male; low-male - low-female | 953    | 953_at    | HGNC:3363  |
| 173 | OFD1    | OFD1 centriole and centriolar satellite protein  | 4.4135 | 0.0127   | 1.8962 | 0.36696 | high-female - high-male; low-female - high-female; high-female - low-male; low-female - high-male; low-male - high-male; low-female - low-male | 8481   | 8481_at   | HGNC:2567  |
| 174 | PSIP1   | PC4 and SFRS1 interacting protein 1              | 4.4012 | 0.012843 | 1.8913 | 0.36899 | high-female - high-male; low-female - high-female; low-male - high-female; low-female - high-male; low-male - high-male; low-female - low-male | 11168  | 11168_at  | HGNC:9527  |
| 175 | FRG1BP  | FSHD region gene 1 family member B, pseudogene   | 4.3931 | 0.01294  | 1.8881 | 0.36963 | high-male - high-female; high-female - low-female; low-male - high-female; high-male - low-female; high-male - low-male; low-male - low-female | 284802 | 284802_at | HGNC:15792 |

|     |         |                                                    |        |          |        |         |                                                                                                                                                |        |           |            |
|-----|---------|----------------------------------------------------|--------|----------|--------|---------|------------------------------------------------------------------------------------------------------------------------------------------------|--------|-----------|------------|
| 176 | CXXC5   | CXXC finger protein 5                              | 4.3795 | 0.013103 | 1.8826 | 0.37216 | high-male - high-female; low-female - high-female; low-male - high-female; low-female - high-male; high-male - low-male; low-female - low-male | 51523  | 51523_at  | HGNC:26943 |
| 177 | SEMA4A  | semaphorin 4A                                      | 4.3616 | 0.013321 | 1.8755 | 0.37621 | high-male - high-female; high-female - low-female; high-female - low-male; high-male - low-female; high-male - low-male; low-male - low-female | 64218  | 64218_at  | HGNC:10729 |
| 178 | MFSD2A  | major facilitator superfamily domain containing 2A | 4.3551 | 0.013402 | 1.8728 | 0.37637 | high-male - high-female; low-female - high-female; low-male - high-female; high-male - low-female; high-male - low-male; low-female - low-male | 84879  | 84879_at  | HGNC:25897 |
| 179 | ZNF429  | zinc finger protein 429                            | 4.3482 | 0.013486 | 1.8701 | 0.37664 | high-male - high-female; low-female - high-female; low-male - high-female; low-female - high-male; high-male - low-male; low-female - low-male | 353088 | 353088_at | HGNC:20817 |
| 180 | HMG1    | high mobility group nucleosome binding domain 1    | 4.331  | 0.013703 | 1.8632 | 0.37931 | high-male - high-female; low-female - high-female; high-female - low-male; low-female - high-male; high-male - low-male; low-female - low-male | 3150   | 3150_at   | HGNC:4984  |
| 181 | ZBTB16  | zinc finger and BTB domain containing 16           | 4.3269 | 0.013756 | 1.8615 | 0.37931 | high-male - high-female; low-female - high-female; low-male - high-female; low-female - high-male; low-male - high-male; low-female - low-male | 7704   | 7704_at   | HGNC:12930 |
| 182 | OGFRL1  | opioid growth factor receptor like 1               | 4.3226 | 0.01381  | 1.8598 | 0.37931 | high-male - high-female; high-female - low-female; low-male - high-female; high-male - low-female; high-male - low-male; low-male - low-female | 79627  | 79627_at  | HGNC:21378 |
| 183 | ERCC6L2 | ERCC excision repair 6 like 2                      | 4.3158 | 0.013896 | 1.8571 | 0.37961 | high-female - high-male; low-female - high-female; low-male - high-female; low-female - high-male; low-male - high-male; low-female - low-male | 375748 | 375748_at | HGNC:26922 |

|     |         |                                             |        |          |        |         |                                                                                                                                                |        |           |            |
|-----|---------|---------------------------------------------|--------|----------|--------|---------|------------------------------------------------------------------------------------------------------------------------------------------------|--------|-----------|------------|
| 184 | ZNF570  | zinc finger protein 570                     | 4.3099 | 0.013974 | 1.8547 | 0.37964 | high-male - high-female; low-female - high-female; low-male - high-female; low-female - high-male; low-male - high-male; low-female - low-male | 148268 | 148268_at | HGNC:26416 |
| 185 | CARD11  | caspase recruitment domain family member 11 | 4.298  | 0.014128 | 1.8499 | 0.38175 | high-male - high-female; low-female - high-female; low-male - high-female; low-female - high-male; low-male - high-male; low-female - low-male | 84433  | 84433_at  | HGNC:16393 |
| 186 | ARSD    | arylsulfatase D                             | 4.2886 | 0.014252 | 1.8461 | 0.38304 | high-female - high-male; low-female - high-female; high-female - low-male; low-female - high-male; high-male - low-male; low-female - low-male | 414    | 414_at    | HGNC:717   |
| 187 | RHOQ    | ras homolog family member Q                 | 4.2777 | 0.014396 | 1.8417 | 0.38485 | high-male - high-female; low-female - high-female; low-male - high-female; low-female - high-male; high-male - low-male; low-female - low-male | 23433  | 23433_at  | HGNC:17736 |
| 188 | SPIC    | Spi-C transcription factor                  | 4.2391 | 0.014922 | 1.8262 | 0.39678 | high-female - high-male; high-female - low-female; high-female - low-male; high-male - low-female; high-male - low-male; low-female - low-male | 121599 | 121599_at | HGNC:29549 |
| 189 | CST2    | cystatin SA                                 | 4.2324 | 0.015016 | 1.8234 | 0.39718 | high-male - high-female; low-female - high-female; low-male - high-female; high-male - low-female; high-male - low-male; low-male - low-female | 1470   | 1470_at   | HGNC:2474  |
| 190 | JMJD8   | jumonji domain containing 8                 | 4.2172 | 0.015229 | 1.8173 | 0.40065 | high-male - high-female; low-female - high-female; low-male - high-female; high-male - low-female; high-male - low-male; low-male - low-female | 339123 | 339123_at | HGNC:14148 |
| 191 | MRPS18A | mitochondrial ribosomal protein S18A        | 4.2117 | 0.015308 | 1.8151 | 0.40065 | high-male - high-female; low-female - high-female; low-male - high-female; high-male - low-female; high-male - low-male; low-female - low-male | 55168  | 55168_at  | HGNC:14515 |



|     |        |                                                                            |        |          |        |         |                                                                                                                                                |       |          |            |
|-----|--------|----------------------------------------------------------------------------|--------|----------|--------|---------|------------------------------------------------------------------------------------------------------------------------------------------------|-------|----------|------------|
| 192 | ARID5B | AT-rich interaction domain 5B                                              | 4.1948 | 0.015552 | 1.8082 | 0.40068 | high-female - high-male; low-female - high-female; high-female - low-male; low-female - high-male; high-male - low-male; low-female - low-male | 84159 | 84159_at | HGNC:17362 |
| 193 | GRAMD4 | GRAM domain containing 4                                                   | 4.1935 | 0.015569 | 1.8077 | 0.40068 | high-male - high-female; low-female - high-female; low-male - high-female; high-male - low-female; high-male - low-male; low-male - low-female | 23151 | 23151_at | HGNC:29113 |
| 194 | GPR160 | G protein-coupled receptor 160                                             | 4.1929 | 0.015578 | 1.8075 | 0.40068 | high-male - high-female; low-female - high-female; low-male - high-female; high-male - low-female; high-male - low-male; low-male - low-female | 26996 | 26996_at | HGNC:23693 |
| 195 | NUP210 | nucleoporin 210                                                            | 4.1869 | 0.015666 | 1.805  | 0.40068 | high-female - high-male; low-female - high-female; high-female - low-male; low-female - high-male; low-male - high-male; low-female - low-male | 23225 | 23225_at | HGNC:30052 |
| 196 | CD93   | CD93 molecule                                                              | 4.1839 | 0.01571  | 1.8038 | 0.40068 | high-male - high-female; low-female - high-female; low-male - high-female; high-male - low-female; high-male - low-male; low-male - low-female | 22918 | 22918_at | HGNC:15855 |
| 197 | GBGT1  | globoside alpha-1,3-N-acetylgalactosaminyltransferase 1 (FORS blood group) | 4.1712 | 0.015898 | 1.7987 | 0.40278 | high-male - high-female; low-female - high-female; low-male - high-female; high-male - low-female; high-male - low-male; low-male - low-female | 26301 | 26301_at | HGNC:20460 |
| 198 | PLIN2  | perilipin 2                                                                | 4.1675 | 0.015953 | 1.7972 | 0.40278 | high-male - high-female; low-female - high-female; low-male - high-female; low-female - high-male; high-male - low-male; low-female - low-male | 123   | 123_at   | HGNC:248   |
| 199 | G6PC3  | glucose-6-phosphatase catalytic subunit 3                                  | 4.1606 | 0.016056 | 1.7944 | 0.4033  | high-male - high-female; high-female - low-female; low-male - high-female; high-male - low-female; high-male - low-male; low-male - low-female | 92579 | 92579_at | HGNC:24861 |

|     |             |                                              |        |          |        |         |                                                                                                                                                |           |              |            |
|-----|-------------|----------------------------------------------|--------|----------|--------|---------|------------------------------------------------------------------------------------------------------------------------------------------------|-----------|--------------|------------|
| 200 | H2BC7       | H2B clustered histone 7                      | 4.1553 | 0.016135 | 1.7922 | 0.4033  | high-male - high-female; low-female - high-female; high-female - low-male; high-male - low-female; high-male - low-male; low-female - low-male | 8343      | 8343_at      | HGNC:4752  |
| 201 | ACP5        | acid phosphatase 5, tartrate resistant       | 4.1436 | 0.016314 | 1.7874 | 0.40573 | high-male - high-female; low-female - high-female; low-male - high-female; high-male - low-female; high-male - low-male; low-female - low-male | 54        | 54_at        | HGNC:124   |
| 202 | SNORD116-29 | small nucleolar RNA, C/D box 116-29          | 4.1345 | 0.016453 | 1.7837 | 0.4068  | high-female - high-male; low-female - high-female; high-female - low-male; low-female - high-male; high-male - low-male; low-female - low-male | 100033821 | 100033821_at | HGNC:33348 |
| 203 | PTGDR2      | prostaglandin D2 receptor 2                  | 4.127  | 0.016569 | 1.7807 | 0.4068  | high-male - high-female; low-female - high-female; low-male - high-female; high-male - low-female; low-male - high-male; low-male - low-female | 11251     | 11251_at     | HGNC:4502  |
| 204 | ZNF107      | zinc finger protein 107                      | 4.125  | 0.016601 | 1.7799 | 0.4068  | high-female - high-male; low-female - high-female; low-male - high-female; low-female - high-male; low-male - high-male; low-female - low-male | 51427     | 51427_at     | HGNC:12887 |
| 205 | ZNF678      | zinc finger protein 678                      | 4.0894 | 0.017165 | 1.7654 | 0.41764 | high-female - high-male; low-female - high-female; low-male - high-female; low-female - high-male; low-male - high-male; low-female - low-male | 339500    | 339500_at    | HGNC:28652 |
| 206 | FAM118A     | family with sequence similarity 118 member A | 4.0795 | 0.017324 | 1.7614 | 0.41764 | high-male - high-female; high-female - low-female; low-male - high-female; high-male - low-female; high-male - low-male; low-male - low-female | 55007     | 55007_at     | HGNC:1313  |
| 207 | ABITRAM     | actin binding transcription modulator        | 4.077  | 0.017365 | 1.7603 | 0.41764 | high-male - high-female; low-female - high-female; low-male - high-female; high-male - low-female; high-male - low-male; low-male - low-female | 54942     | 54942_at     | HGNC:1364  |

|     |         |                                                     |        |          |        |         |                                                                                                                                                |       |          |            |
|-----|---------|-----------------------------------------------------|--------|----------|--------|---------|------------------------------------------------------------------------------------------------------------------------------------------------|-------|----------|------------|
| 208 | ALDH2   | aldehyde dehydrogenase 2 family member              | 4.0763 | 0.017377 | 1.76   | 0.41764 | high-male - high-female; high-female - low-female; low-male - high-female; high-male - low-female; high-male - low-male; low-male - low-female | 217   | 217_at   | HGNC:404   |
| 209 | RRAS2   | RAS related 2                                       | 4.0678 | 0.017516 | 1.7566 | 0.41895 | high-male - high-female; low-female - high-female; high-female - low-male; low-female - high-male; high-male - low-male; low-female - low-male | 22800 | 22800_at | HGNC:17271 |
| 210 | ATP6V0B | ATPase H+ transporting V0 subunit b                 | 4.0467 | 0.017867 | 1.7479 | 0.42422 | high-male - high-female; high-female - low-female; high-female - low-male; high-male - low-female; high-male - low-male; low-male - low-female | 533   | 533_at   | HGNC:861   |
| 211 | CNTLN   | centlein                                            | 4.0431 | 0.017929 | 1.7464 | 0.42422 | high-male - high-female; high-female - low-female; low-male - high-female; high-male - low-female; high-male - low-male; low-male - low-female | 54875 | 54875_at | HGNC:23432 |
| 212 | UGDH    | UDP-glucose 6-dehydrogenase                         | 4.0367 | 0.018037 | 1.7438 | 0.42422 | high-male - high-female; low-female - high-female; low-male - high-female; high-male - low-female; high-male - low-male; low-female - low-male | 7358  | 7358_at  | HGNC:12525 |
| 213 | PAK1    | p21 (RAC1) activated kinase 1                       | 4.0344 | 0.018075 | 1.7429 | 0.42422 | high-male - high-female; high-female - low-female; low-male - high-female; high-male - low-female; high-male - low-male; low-male - low-female | 5058  | 5058_at  | HGNC:8590  |
| 214 | SHQ1    | SHQ1, H/ACA ribonucleoprotein assembly factor       | 4.0269 | 0.018204 | 1.7398 | 0.42525 | high-male - high-female; low-female - high-female; high-female - low-male; low-female - high-male; high-male - low-male; low-female - low-male | 55164 | 55164_at | HGNC:25543 |
| 215 | HLA-DMB | major histocompatibility complex, class II, DM beta | 4.0112 | 0.018476 | 1.7334 | 0.42867 | high-male - high-female; low-female - high-female; low-male - high-female; high-male - low-female; high-male - low-male; low-male - low-female | 3109  | 3109_at  | HGNC:4935  |

|     |          |                                             |        |          |        |         |                                                                                                                                                |       |          |            |
|-----|----------|---------------------------------------------|--------|----------|--------|---------|------------------------------------------------------------------------------------------------------------------------------------------------|-------|----------|------------|
| 216 | ZNF468   | zinc finger protein 468                     | 4.0086 | 0.018522 | 1.7323 | 0.42867 | high-male - high-female; low-female - high-female; high-female - low-male; low-female - high-male; high-male - low-male; low-female - low-male | 90333 | 90333_at | HGNC:33105 |
| 217 | RNASE6   | ribonuclease A family member k6             | 3.9921 | 0.018812 | 1.7256 | 0.43338 | high-male - high-female; low-female - high-female; low-male - high-female; high-male - low-female; high-male - low-male; low-male - low-female | 6039  | 6039_at  | HGNC:10048 |
| 218 | MIS18BP1 | MIS18 binding protein 1                     | 3.98   | 0.019028 | 1.7206 | 0.43368 | high-male - high-female; low-female - high-female; low-male - high-female; high-male - low-female; high-male - low-male; low-male - low-female | 55320 | 55320_at | HGNC:20190 |
| 219 | GRAP     | GRB2 related adaptor protein                | 3.9793 | 0.019041 | 1.7203 | 0.43368 | high-male - high-female; low-female - high-female; low-male - high-female; low-female - high-male; high-male - low-male; low-female - low-male | 10750 | 10750_at | HGNC:4562  |
| 220 | MAP10    | microtubule associated protein 10           | 3.9769 | 0.019086 | 1.7193 | 0.43368 | high-male - high-female; low-female - high-female; low-male - high-female; low-female - high-male; high-male - low-male; low-female - low-male | 54627 | 54627_at | HGNC:29265 |
| 221 | CD86     | CD86 molecule                               | 3.9658 | 0.019286 | 1.7147 | 0.43497 | high-male - high-female; high-female - low-female; low-male - high-female; high-male - low-female; high-male - low-male; low-male - low-female | 942   | 942_at   | HGNC:1705  |
| 222 | BLVRB    | biliverdin reductase B                      | 3.9545 | 0.019494 | 1.7101 | 0.43497 | high-male - high-female; low-female - high-female; low-male - high-female; high-male - low-female; high-male - low-male; low-male - low-female | 645   | 645_at   | HGNC:1063  |
| 223 | NPC2     | NPC intracellular cholesterol transporter 2 | 3.953  | 0.019522 | 1.7095 | 0.43497 | high-male - high-female; high-female - low-female; low-male - high-female; high-male - low-female; high-male - low-male; low-male - low-female | 10577 | 10577_at | HGNC:14537 |

|     |         |                                          |        |          |        |         |                                                                                                                                                |       |          |            |
|-----|---------|------------------------------------------|--------|----------|--------|---------|------------------------------------------------------------------------------------------------------------------------------------------------|-------|----------|------------|
| 224 | DDX55   | DEAD-box helicase 55                     | 3.953  | 0.019523 | 1.7095 | 0.43497 | high-female - high-male; low-female - high-female; low-male - high-female; low-female - high-male; low-male - high-male; low-female - low-male | 57696 | 57696_at | HGNC:20085 |
| 225 | BCAT1   | branched chain amino acid transaminase 1 | 3.9281 | 0.01999  | 1.6992 | 0.43497 | high-male - high-female; low-female - high-female; low-male - high-female; low-female - high-male; high-male - low-male; low-female - low-male | 586   | 586_at   | HGNC:976   |
| 226 | SIGLEC6 | sialic acid binding Ig like lectin 6     | 3.9268 | 0.020013 | 1.6987 | 0.43497 | high-male - high-female; low-female - high-female; high-female - low-male; low-female - high-male; high-male - low-male; low-female - low-male | 946   | 946_at   | HGNC:10875 |
| 227 | TBC1D31 | TBC1 domain family member 31             | 3.9254 | 0.020039 | 1.6981 | 0.43497 | high-male - high-female; low-female - high-female; low-male - high-female; low-female - high-male; high-male - low-male; low-female - low-male | 93594 | 93594_at | HGNC:30888 |
| 228 | SKP1    | S-phase kinase associated protein 1      | 3.9249 | 0.02005  | 1.6979 | 0.43497 | high-male - high-female; high-female - low-female; high-female - low-male; high-male - low-female; high-male - low-male; low-male - low-female | 6500  | 6500_at  | HGNC:10899 |
| 229 | ZNF426  | zinc finger protein 426                  | 3.9192 | 0.020159 | 1.6955 | 0.43497 | high-male - high-female; low-female - high-female; low-male - high-female; low-female - high-male; low-male - high-male; low-female - low-male | 79088 | 79088_at | HGNC:20725 |
| 230 | ZNF486  | zinc finger protein 486                  | 3.9137 | 0.020265 | 1.6933 | 0.43497 | high-male - high-female; low-female - high-female; high-female - low-male; low-female - high-male; high-male - low-male; low-female - low-male | 90649 | 90649_at | HGNC:20807 |
| 231 | CD1C    | CD1c molecule                            | 3.9096 | 0.020343 | 1.6916 | 0.43497 | high-male - high-female; low-female - high-female; low-male - high-female; high-male - low-female; low-male - high-male; low-male - low-female | 911   | 911_at   | HGNC:1636  |

|     |        |                                                      |        |          |        |         |                                                                                                                                                |       |          |            |
|-----|--------|------------------------------------------------------|--------|----------|--------|---------|------------------------------------------------------------------------------------------------------------------------------------------------|-------|----------|------------|
| 232 | KCNQ5  | potassium voltage-gated channel subfamily Q member 5 | 3.9078 | 0.020379 | 1.6908 | 0.43497 | high-female - high-male; low-female - high-female; low-male - high-female; low-female - high-male; low-male - high-male; low-female - low-male | 56479 | 56479_at | HGNC:6299  |
| 233 | RPL31  | ribosomal protein L31                                | 3.9065 | 0.020403 | 1.6903 | 0.43497 | high-male - high-female; low-female - high-female; low-male - high-female; low-female - high-male; low-male - high-male; low-female - low-male | 6160  | 6160_at  | HGNC:10334 |
| 234 | SMC6   | structural maintenance of chromosomes 6              | 3.9046 | 0.02044  | 1.6895 | 0.43497 | high-male - high-female; low-female - high-female; low-male - high-female; low-female - high-male; low-male - high-male; low-female - low-male | 79677 | 79677_at | HGNC:20466 |
| 235 | PLXND1 | plexin D1                                            | 3.9034 | 0.020465 | 1.689  | 0.43497 | high-male - high-female; low-female - high-female; low-male - high-female; high-male - low-female; high-male - low-male; low-female - low-male | 23129 | 23129_at | HGNC:9107  |
| 236 | ABHD12 | abhydrolase domain containing 12                     | 3.8924 | 0.020679 | 1.6845 | 0.43497 | high-male - high-female; low-female - high-female; low-male - high-female; high-male - low-female; high-male - low-male; low-female - low-male | 26090 | 26090_at | HGNC:15868 |
| 237 | FGL2   | fibrinogen like 2                                    | 3.8908 | 0.02071  | 1.6838 | 0.43497 | high-male - high-female; high-female - low-female; low-male - high-female; high-male - low-female; high-male - low-male; low-male - low-female | 10875 | 10875_at | HGNC:3696  |
| 238 | CRTAP  | cartilage associated protein                         | 3.8873 | 0.02078  | 1.6824 | 0.43497 | high-male - high-female; low-female - high-female; low-male - high-female; high-male - low-female; high-male - low-male; low-male - low-female | 10491 | 10491_at | HGNC:2379  |
| 239 | CD1D   | CD1d molecule                                        | 3.8859 | 0.020806 | 1.6818 | 0.43497 | high-male - high-female; low-female - high-female; low-male - high-female; high-male - low-female; high-male - low-male; low-male - low-female | 912   | 912_at   | HGNC:1637  |

|     |        |                                                   |        |          |        |         |                                                                                                                                                |        |           |            |
|-----|--------|---------------------------------------------------|--------|----------|--------|---------|------------------------------------------------------------------------------------------------------------------------------------------------|--------|-----------|------------|
| 240 | TPRA1  | transmembrane protein adipocyte associated 1      | 3.8783 | 0.020959 | 1.6786 | 0.43497 | high-male - high-female; low-female - high-female; low-male - high-female; high-male - low-female; high-male - low-male; low-male - low-female | 131601 | 131601_at | HGNC:30413 |
| 241 | BNIP3  | BCL2 interacting protein 3                        | 3.8777 | 0.02097  | 1.6784 | 0.43497 | high-male - high-female; low-female - high-female; high-female - low-male; low-female - high-male; high-male - low-male; low-female - low-male | 664    | 664_at    | HGNC:1084  |
| 242 | NUP205 | nucleoporin 205                                   | 3.8618 | 0.02129  | 1.6718 | 0.43722 | high-male - high-female; low-female - high-female; low-male - high-female; low-female - high-male; low-male - high-male; low-female - low-male | 23165  | 23165_at  | HGNC:18658 |
| 243 | AKTIP  | AKT interacting protein                           | 3.8583 | 0.021361 | 1.6704 | 0.43722 | high-male - high-female; low-female - high-female; low-male - high-female; low-female - high-male; low-male - high-male; low-female - low-male | 64400  | 64400_at  | HGNC:16710 |
| 244 | MCTP1  | multiple C2 and transmembrane domain containing 1 | 3.8563 | 0.021403 | 1.6695 | 0.43722 | high-male - high-female; high-female - low-female; low-male - high-female; high-male - low-female; high-male - low-male; low-male - low-female | 79772  | 79772_at  | HGNC:26183 |
| 245 | ITK    | IL2 inducible T cell kinase                       | 3.8486 | 0.02156  | 1.6663 | 0.43722 | high-female - high-male; high-female - low-female; high-female - low-male; low-female - high-male; low-male - high-male; low-female - low-male | 3702   | 3702_at   | HGNC:6171  |
| 246 | COBLL1 | cordon-bleu WH2 repeat protein like 1             | 3.8394 | 0.021751 | 1.6625 | 0.43722 | high-male - high-female; low-female - high-female; low-male - high-female; low-female - high-male; low-male - high-male; low-female - low-male | 22837  | 22837_at  | HGNC:23571 |
| 247 | NT5E   | 5'-nucleotidase ecto                              | 3.8386 | 0.021766 | 1.6622 | 0.43722 | high-female - high-male; low-female - high-female; low-male - high-female; low-female - high-male; low-male - high-male; low-female - low-male | 4907   | 4907_at   | HGNC:8021  |

|     |        |                                                               |        |          |        |         |                                                                                                                                                |        |           |            |
|-----|--------|---------------------------------------------------------------|--------|----------|--------|---------|------------------------------------------------------------------------------------------------------------------------------------------------|--------|-----------|------------|
| 248 | ZHX2   | zinc fingers and homeoboxes 2                                 | 3.8376 | 0.021787 | 1.6618 | 0.43722 | high-female - high-male; low-female - high-female; low-male - high-female; low-female - high-male; low-male - high-male; low-female - low-male | 22882  | 22882_at  | HGNC:18513 |
| 249 | ZNF626 | zinc finger protein 626                                       | 3.8363 | 0.021816 | 1.6612 | 0.43722 | high-male - high-female; low-female - high-female; high-female - low-male; low-female - high-male; high-male - low-male; low-female - low-male | 199777 | 199777_at | HGNC:30461 |
| 250 | FHL3   | four and a half LIM domains 3                                 | 3.8339 | 0.021865 | 1.6602 | 0.43722 | high-male - high-female; high-female - low-female; low-male - high-female; high-male - low-female; high-male - low-male; low-male - low-female | 2275   | 2275_at   | HGNC:3704  |
| 251 | TRAF5  | TNF receptor associated factor 5                              | 3.8282 | 0.021984 | 1.6579 | 0.43748 | high-female - high-male; low-female - high-female; low-male - high-female; low-female - high-male; low-male - high-male; low-female - low-male | 7188   | 7188_at   | HGNC:12035 |
| 252 | UBE2A  | ubiquitin conjugating enzyme E2 A                             | 3.8205 | 0.022146 | 1.6547 | 0.43748 | high-male - high-female; low-female - high-female; low-male - high-female; high-male - low-female; high-male - low-male; low-male - low-female | 7319   | 7319_at   | HGNC:12472 |
| 253 | NAAA   | N-acyl ethanolamine acid amidase                              | 3.8152 | 0.02226  | 1.6525 | 0.43748 | high-male - high-female; low-female - high-female; low-male - high-female; high-male - low-female; high-male - low-male; low-male - low-female | 27163  | 27163_at  | HGNC:736   |
| 254 | SAT2   | spermidine/spermine N1-acetyltransferase family member 2      | 3.8089 | 0.022393 | 1.6499 | 0.43748 | high-male - high-female; low-female - high-female; low-male - high-female; high-male - low-female; high-male - low-male; low-female - low-male | 112483 | 112483_at | HGNC:23160 |
| 255 | PMS2P5 | PMS1 homolog 2, mismatch repair system component pseudogene 5 | 3.8077 | 0.022419 | 1.6494 | 0.43748 | high-male - high-female; low-female - high-female; low-male - high-female; low-female - high-male; low-male - high-male; low-female - low-male | 5383   | 5383_at   | HGNC:9130  |



|     |        |                                                        |        |          |        |         |                                                                                                                                                |       |          |            |
|-----|--------|--------------------------------------------------------|--------|----------|--------|---------|------------------------------------------------------------------------------------------------------------------------------------------------|-------|----------|------------|
| 256 | PLCB1  | phospholipase C beta 1                                 | 3.8046 | 0.022487 | 1.6481 | 0.43748 | high-male - high-female; low-female - high-female; low-male - high-female; high-male - low-female; high-male - low-male; low-male - low-female | 23236 | 23236_at | HGNC:15917 |
| 257 | QARS1  | glutaminyl-tRNA synthetase 1                           | 3.8044 | 0.022491 | 1.648  | 0.43748 | high-male - high-female; high-female - low-female; low-male - high-female; high-male - low-female; high-male - low-male; low-male - low-female | 5859  | 5859_at  | HGNC:9751  |
| 258 | HIGD1A | HIG1 hypoxia inducible domain family member 1A         | 3.7944 | 0.022708 | 1.6438 | 0.43999 | high-male - high-female; high-female - low-female; high-female - low-male; high-male - low-female; high-male - low-male; low-female - low-male | 25994 | 25994_at | HGNC:29527 |
| 259 | H2AC13 | H2A clustered histone 13                               | 3.7697 | 0.023252 | 1.6335 | 0.44698 | high-male - high-female; low-female - high-female; high-female - low-male; low-female - high-male; high-male - low-male; low-female - low-male | 8329  | 8329_at  | HGNC:4725  |
| 260 | MBD4   | methyl-CpG binding domain 4, DNA glycosylase           | 3.7674 | 0.023302 | 1.6326 | 0.44698 | high-male - high-female; low-female - high-female; low-male - high-female; low-female - high-male; low-male - high-male; low-female - low-male | 8930  | 8930_at  | HGNC:6919  |
| 261 | GRK3   | G protein-coupled receptor kinase 3                    | 3.7658 | 0.023337 | 1.632  | 0.44698 | high-male - high-female; low-female - high-female; low-male - high-female; high-male - low-female; high-male - low-male; low-male - low-female | 157   | 157_at   | HGNC:290   |
| 262 | GGTA1P | glycoprotein alpha-galactosyltransferase 1, pseudogene | 3.7536 | 0.023612 | 1.6269 | 0.44873 | high-male - high-female; high-female - low-female; high-female - low-male; high-male - low-female; high-male - low-male; low-male - low-female | 2681  | 2681_at  | HGNC:4253  |
| 263 | NCF2   | neutrophil cytosolic factor 2                          | 3.7494 | 0.023708 | 1.6251 | 0.44873 | high-male - high-female; high-female - low-female; low-male - high-female; high-male - low-female; high-male - low-male; low-male - low-female | 4688  | 4688_at  | HGNC:7661  |

|     |          |                                                  |        |          |        |         |                                                                                                                                                |        |           |            |
|-----|----------|--------------------------------------------------|--------|----------|--------|---------|------------------------------------------------------------------------------------------------------------------------------------------------|--------|-----------|------------|
| 264 | NDFIP2   | Nedd4 family interacting protein 2               | 3.7462 | 0.023783 | 1.6237 | 0.44873 | high-male - high-female; low-female - high-female; low-male - high-female; low-female - high-male; high-male - low-male; low-female - low-male | 54602  | 54602_at  | HGNC:18537 |
| 265 | CD27     | CD27 molecule                                    | 3.7423 | 0.02387  | 1.6221 | 0.44873 | high-female - high-male; low-female - high-female; high-female - low-male; low-female - high-male; low-male - high-male; low-female - low-male | 939    | 939_at    | HGNC:11922 |
| 266 | GTF2H1   | general transcription factor IIH subunit 1       | 3.742  | 0.023877 | 1.622  | 0.44873 | high-male - high-female; low-female - high-female; low-male - high-female; high-male - low-female; high-male - low-male; low-female - low-male | 2965   | 2965_at   | HGNC:4655  |
| 267 | C1D      | C1D nuclear receptor corepressor                 | 3.7307 | 0.024138 | 1.6173 | 0.45163 | high-male - high-female; low-female - high-female; low-male - high-female; high-male - low-female; high-male - low-male; low-female - low-male | 10438  | 10438_at  | HGNC:29911 |
| 268 | TBC1D10C | TBC1 domain family member 10C                    | 3.7256 | 0.024257 | 1.6152 | 0.45163 | high-female - high-male; low-female - high-female; low-male - high-female; low-female - high-male; low-male - high-male; low-female - low-male | 374403 | 374403_at | HGNC:24702 |
| 269 | DPH5     | diphthamide biosynthesis 5                       | 3.7199 | 0.024389 | 1.6128 | 0.45163 | high-female - high-male; low-female - high-female; high-female - low-male; low-female - high-male; low-male - high-male; low-female - low-male | 51611  | 51611_at  | HGNC:24270 |
| 270 | PLPP1    | phospholipid phosphatase 1                       | 3.7108 | 0.024604 | 1.609  | 0.45163 | high-female - high-male; low-female - high-female; high-female - low-male; low-female - high-male; low-male - high-male; low-female - low-male | 8611   | 8611_at   | HGNC:9228  |
| 271 | DNAJC8   | DnaJ heat shock protein family (Hsp40) member C8 | 3.7088 | 0.024652 | 1.6081 | 0.45163 | high-male - high-female; low-female - high-female; low-male - high-female; high-male - low-female; high-male - low-male; low-female - low-male | 22826  | 22826_at  | HGNC:15470 |

|     |          |                                                      |        |          |        |         |                                                                                                                                                |        |           |            |
|-----|----------|------------------------------------------------------|--------|----------|--------|---------|------------------------------------------------------------------------------------------------------------------------------------------------|--------|-----------|------------|
| 272 | SLC25A19 | solute carrier family 25 member 19                   | 3.7051 | 0.024739 | 1.6066 | 0.45163 | high-male - high-female; low-female - high-female; low-male - high-female; high-male - low-female; high-male - low-male; low-male - low-female | 60386  | 60386_at  | HGNC:14409 |
| 273 | PCNA     | proliferating cell nuclear antigen                   | 3.703  | 0.024792 | 1.6057 | 0.45163 | high-female - high-male; low-female - high-female; high-female - low-male; low-female - high-male; high-male - low-male; low-female - low-male | 5111   | 5111_at   | HGNC:8729  |
| 274 | ECRP     | ribonuclease A family member 2 pseudogene            | 3.7012 | 0.024833 | 1.605  | 0.45163 | high-male - high-female; low-female - high-female; low-male - high-female; high-male - low-female; high-male - low-male; low-male - low-female | 643332 | 643332_at |            |
| 275 | ZNF124   | zinc finger protein 124                              | 3.6942 | 0.025003 | 1.602  | 0.45163 | high-male - high-female; low-female - high-female; low-male - high-female; high-male - low-female; high-male - low-male; low-female - low-male | 7678   | 7678_at   | HGNC:12907 |
| 276 | CPPED1   | calcineurin like phosphoesterase domain containing 1 | 3.6859 | 0.025204 | 1.5985 | 0.45163 | high-male - high-female; high-female - low-female; low-male - high-female; high-male - low-female; high-male - low-male; low-male - low-female | 55313  | 55313_at  | HGNC:25632 |
| 277 | TUBA1B   | tubulin alpha 1b                                     | 3.6811 | 0.02532  | 1.5965 | 0.45163 | high-male - high-female; high-female - low-female; high-female - low-male; high-male - low-female; high-male - low-male; low-female - low-male | 10376  | 10376_at  | HGNC:18809 |
| 278 | PKP2     | plakophilin 2                                        | 3.6777 | 0.025402 | 1.5951 | 0.45163 | high-male - high-female; high-female - low-female; high-female - low-male; high-male - low-female; high-male - low-male; low-male - low-female | 5318   | 5318_at   | HGNC:9024  |
| 279 | GOLPH3L  | golgi phosphoprotein 3 like                          | 3.6734 | 0.025509 | 1.5933 | 0.45163 | high-female - high-male; low-female - high-female; high-female - low-male; low-female - high-male; low-male - high-male; low-female - low-male | 55204  | 55204_at  | HGNC:24882 |

|     |          |                                             |        |          |        |         |                                                                                                                                                |        |           |            |
|-----|----------|---------------------------------------------|--------|----------|--------|---------|------------------------------------------------------------------------------------------------------------------------------------------------|--------|-----------|------------|
| 280 | SNORD49B | small nucleolar RNA, C/D box 49B            | 3.6722 | 0.025538 | 1.5928 | 0.45163 | high-male - high-female; low-female - high-female; high-female - low-male; low-female - high-male; high-male - low-male; low-female - low-male | 692087 | 692087_at | HGNC:32721 |
| 281 | GAPT     | GRB2 binding adaptor protein, transmembrane | 3.6651 | 0.025713 | 1.5898 | 0.45163 | high-male - high-female; low-female - high-female; low-male - high-female; high-male - low-female; high-male - low-male; low-male - low-female | 202309 | 202309_at | HGNC:26588 |
| 282 | FES      | FES proto-oncogene, tyrosine kinase         | 3.6632 | 0.025761 | 1.589  | 0.45163 | high-male - high-female; low-female - high-female; low-male - high-female; high-male - low-female; high-male - low-male; low-male - low-female | 2242   | 2242_at   | HGNC:3657  |
| 283 | LARP1B   | La ribonucleoprotein 1B                     | 3.6549 | 0.025968 | 1.5856 | 0.45163 | high-male - high-female; low-female - high-female; low-male - high-female; low-female - high-male; high-male - low-male; low-female - low-male | 55132  | 55132_at  | HGNC:24704 |
| 284 | KLF13    | Kruppel like factor 13                      | 3.654  | 0.02599  | 1.5852 | 0.45163 | high-male - high-female; low-female - high-female; low-male - high-female; low-female - high-male; low-male - high-male; low-female - low-male | 51621  | 51621_at  | HGNC:13672 |
| 285 | PRLR     | prolactin receptor                          | 3.6508 | 0.026072 | 1.5838 | 0.45163 | high-male - high-female; low-female - high-female; low-male - high-female; high-male - low-female; high-male - low-male; low-male - low-female | 5618   | 5618_at   | HGNC:9446  |
| 286 | RRP15    | ribosomal RNA processing 15 homolog         | 3.6484 | 0.026133 | 1.5828 | 0.45163 | high-male - high-female; low-female - high-female; low-male - high-female; low-female - high-male; low-male - high-male; low-female - low-male | 51018  | 51018_at  | HGNC:24255 |
| 287 | MT2A     | metallothionein 2A                          | 3.6473 | 0.026161 | 1.5823 | 0.45163 | high-female - high-male; high-female - low-female; high-female - low-male; high-male - low-female; high-male - low-male; low-female - low-male | 4502   | 4502_at   | HGNC:7406  |

|     |          |                                                   |        |          |        |         |                                                                                                                                                |        |           |            |
|-----|----------|---------------------------------------------------|--------|----------|--------|---------|------------------------------------------------------------------------------------------------------------------------------------------------|--------|-----------|------------|
| 288 | ZNF385A  | zinc finger protein 385A                          | 3.6436 | 0.026255 | 1.5808 | 0.45163 | high-male - high-female; high-female - low-female; low-male - high-female; high-male - low-female; high-male - low-male; low-male - low-female | 25946  | 25946_at  | HGNC:17521 |
| 289 | NUDT16P1 | nudix hydrolase 16 pseudogene 1                   | 3.6391 | 0.026368 | 1.5789 | 0.45163 | high-male - high-female; high-female - low-female; low-male - high-female; high-male - low-female; high-male - low-male; low-male - low-female | 152195 | 152195_at | HGNC:27189 |
| 290 | FRY      | FRY microtubule binding protein                   | 3.6351 | 0.026471 | 1.5772 | 0.45163 | high-male - high-female; high-female - low-female; low-male - high-female; high-male - low-female; low-male - high-male; low-male - low-female | 10129  | 10129_at  | HGNC:20367 |
| 291 | ANK3     | ankyrin 3                                         | 3.6329 | 0.026528 | 1.5763 | 0.45163 | high-female - high-male; high-female - low-female; low-male - high-female; high-male - low-female; low-male - high-male; low-male - low-female | 288    | 288_at    | HGNC:494   |
| 292 | NUP88    | nucleoporin 88                                    | 3.6305 | 0.02659  | 1.5753 | 0.45163 | high-male - high-female; low-female - high-female; low-male - high-female; low-female - high-male; low-male - high-male; low-female - low-male | 4927   | 4927_at   | HGNC:8067  |
| 293 | RBIS     | ribosomal biogenesis factor                       | 3.6293 | 0.02662  | 1.5748 | 0.45163 | high-male - high-female; low-female - high-female; low-male - high-female; high-male - low-female; high-male - low-male; low-male - low-female | 401466 | 401466_at | HGNC:32235 |
| 294 | CD33     | CD33 molecule                                     | 3.6284 | 0.026642 | 1.5744 | 0.45163 | high-male - high-female; high-female - low-female; low-male - high-female; high-male - low-female; high-male - low-male; low-male - low-female | 945    | 945_at    | HGNC:1659  |
| 295 | DNAJC10  | DnaJ heat shock protein family (Hsp40) member C10 | 3.6212 | 0.026828 | 1.5714 | 0.45163 | high-male - high-female; low-female - high-female; low-male - high-female; low-female - high-male; low-male - high-male; low-female - low-male | 54431  | 54431_at  | HGNC:24637 |

|     |          |                                     |        |          |        |         |                                                                                                                                                |        |           |            |
|-----|----------|-------------------------------------|--------|----------|--------|---------|------------------------------------------------------------------------------------------------------------------------------------------------|--------|-----------|------------|
| 296 | PTGDS    | prostaglandin D2 synthase           | 3.6207 | 0.026842 | 1.5712 | 0.45163 | high-male - high-female; low-female - high-female; low-male - high-female; high-male - low-female; low-male - high-male; low-male - low-female | 5730   | 5730_at   | HGNC:9592  |
| 297 | MAD2L1BP | MAD2L1 binding protein              | 3.6147 | 0.026998 | 1.5687 | 0.45163 | high-male - high-female; low-female - high-female; low-male - high-female; high-male - low-female; high-male - low-male; low-female - low-male | 9587   | 9587_at   | HGNC:21059 |
| 298 | SLC31A2  | solute carrier family 31 member 2   | 3.6124 | 0.027058 | 1.5677 | 0.45163 | high-male - high-female; high-female - low-female; high-female - low-male; high-male - low-female; high-male - low-male; low-male - low-female | 1318   | 1318_at   | HGNC:11017 |
| 299 | CLIC2    | chloride intracellular channel 2    | 3.6065 | 0.027214 | 1.5652 | 0.45163 | high-male - high-female; high-female - low-female; low-male - high-female; high-male - low-female; high-male - low-male; low-male - low-female | 1193   | 1193_at   | HGNC:2063  |
| 300 | FCGR2B   | Fc fragment of IgG receptor IIb     | 3.6056 | 0.027238 | 1.5648 | 0.45163 | high-male - high-female; low-female - high-female; low-male - high-female; low-female - high-male; high-male - low-male; low-female - low-male | 2213   | 2213_at   | HGNC:3618  |
| 301 | C11orf65 | chromosome 11 open reading frame 65 | 3.6016 | 0.027345 | 1.5631 | 0.45163 | high-male - high-female; low-female - high-female; low-male - high-female; low-female - high-male; low-male - high-male; low-female - low-male | 160140 | 160140_at | HGNC:28519 |
| 302 | SUSD1    | sushi domain containing 1           | 3.6    | 0.027386 | 1.5625 | 0.45163 | high-male - high-female; high-female - low-female; high-female - low-male; high-male - low-female; high-male - low-male; low-male - low-female | 64420  | 64420_at  | HGNC:25413 |
| 303 | PCID2    | PCI domain containing 2             | 3.5964 | 0.027481 | 1.561  | 0.45163 | high-female - high-male; low-female - high-female; high-female - low-male; low-female - high-male; low-male - high-male; low-female - low-male | 55795  | 55795_at  | HGNC:25653 |

|     |         |                                                 |        |          |        |         |                                                                                                                                                |        |           |            |
|-----|---------|-------------------------------------------------|--------|----------|--------|---------|------------------------------------------------------------------------------------------------------------------------------------------------|--------|-----------|------------|
| 304 | CYP1B1  | cytochrome P450 family 1 subfamily B member 1   | 3.5951 | 0.027515 | 1.5604 | 0.45163 | high-male - high-female; low-female - high-female; low-male - high-female; high-male - low-female; high-male - low-male; low-female - low-male | 1545   | 1545_at   | HGNC:2597  |
| 305 | TFEC    | transcription factor EC                         | 3.5937 | 0.027555 | 1.5598 | 0.45163 | high-male - high-female; low-female - high-female; low-male - high-female; high-male - low-female; high-male - low-male; low-male - low-female | 22797  | 22797_at  | HGNC:11754 |
| 306 | ACSS2   | acyl-CoA synthetase short chain family member 2 | 3.5844 | 0.027804 | 1.5559 | 0.45273 | high-male - high-female; low-female - high-female; low-male - high-female; high-male - low-female; high-male - low-male; low-male - low-female | 55902  | 55902_at  | HGNC:15814 |
| 307 | TOMM34  | translocase of outer mitochondrial membrane 34  | 3.5823 | 0.027861 | 1.555  | 0.45273 | high-male - high-female; low-female - high-female; low-male - high-female; high-male - low-female; low-male - high-male; low-male - low-female | 10953  | 10953_at  | HGNC:15746 |
| 308 | C4orf46 | chromosome 4 open reading frame 46              | 3.5795 | 0.027937 | 1.5538 | 0.45273 | high-male - high-female; low-female - high-female; high-female - low-male; high-male - low-female; high-male - low-male; low-female - low-male | 201725 | 201725_at | HGNC:27320 |
| 309 | LAMP3   | lysosomal associated membrane protein 3         | 3.5777 | 0.027984 | 1.5531 | 0.45273 | high-female - high-male; low-female - high-female; high-female - low-male; low-female - high-male; high-male - low-male; low-female - low-male | 27074  | 27074_at  | HGNC:14582 |
| 310 | ABI3    | ABI family member 3                             | 3.5729 | 0.028116 | 1.551  | 0.45273 | high-male - high-female; high-female - low-female; high-female - low-male; high-male - low-female; high-male - low-male; low-female - low-male | 51225  | 51225_at  | HGNC:29859 |
| 311 | GOLIM4  | golgi integral membrane protein 4               | 3.5711 | 0.028166 | 1.5503 | 0.45273 | high-male - high-female; low-female - high-female; low-male - high-female; high-male - low-female; high-male - low-male; low-male - low-female | 27333  | 27333_at  | HGNC:15448 |

|     |          |                                                                |        |          |        |         |                                                                                                                                                |        |           |            |
|-----|----------|----------------------------------------------------------------|--------|----------|--------|---------|------------------------------------------------------------------------------------------------------------------------------------------------|--------|-----------|------------|
| 312 | HEATR5B  | HEAT repeat containing 5B                                      | 3.5569 | 0.028557 | 1.5443 | 0.45705 | high-female - high-male; low-female - high-female; low-male - high-female; low-female - high-male; low-male - high-male; low-female - low-male | 54497  | 54497_at  | HGNC:29273 |
| 313 | TRBV25-1 | T cell receptor beta variable 25-1                             | 3.5492 | 0.028772 | 1.541  | 0.45705 | high-male - high-female; low-female - high-female; high-female - low-male; low-female - high-male; high-male - low-male; low-female - low-male | 28562  | 28562_at  | HGNC:12205 |
| 314 | SLC49A4  | solute carrier family 49 member 4                              | 3.5439 | 0.028921 | 1.5388 | 0.45705 | high-male - high-female; low-female - high-female; low-male - high-female; high-male - low-female; high-male - low-male; low-male - low-female | 84925  | 84925_at  | HGNC:16628 |
| 315 | SNORA52  | small nucleolar RNA, H/ACA box 52                              | 3.5429 | 0.028949 | 1.5384 | 0.45705 | high-male - high-female; low-female - high-female; high-female - low-male; low-female - high-male; high-male - low-male; low-female - low-male | 619565 | 619565_at | HGNC:32645 |
| 316 | ZNF724   | zinc finger protein 724                                        | 3.5417 | 0.028983 | 1.5379 | 0.45705 | high-male - high-female; low-female - high-female; high-female - low-male; low-female - high-male; high-male - low-male; low-female - low-male | 440519 | 440519_at | HGNC:32460 |
| 317 | TAS2R50  | taste 2 receptor member 50                                     | 3.5367 | 0.029124 | 1.5357 | 0.45705 | high-female - high-male; high-female - low-female; low-male - high-female; low-female - high-male; low-male - high-male; low-male - low-female | 259296 | 259296_at | HGNC:18882 |
| 318 | JDP2     | Jun dimerization protein 2                                     | 3.5356 | 0.029155 | 1.5353 | 0.45705 | high-male - high-female; low-female - high-female; low-male - high-female; high-male - low-female; low-male - high-male; low-male - low-female | 122953 | 122953_at | HGNC:17546 |
| 319 | SPECC1   | sperm antigen with calponin homology and coiled-coil domains 1 | 3.5352 | 0.029166 | 1.5351 | 0.45705 | high-male - high-female; low-female - high-female; low-male - high-female; high-male - low-female; high-male - low-male; low-male - low-female | 92521  | 92521_at  | HGNC:30615 |



|     |          |                                         |        |          |        |         |                                                                                                                                                |        |           |            |
|-----|----------|-----------------------------------------|--------|----------|--------|---------|------------------------------------------------------------------------------------------------------------------------------------------------|--------|-----------|------------|
| 320 | DGKD     | diacylglycerol kinase delta             | 3.5261 | 0.029427 | 1.5313 | 0.4597  | high-male - high-female; low-female - high-female; low-male - high-female; low-female - high-male; low-male - high-male; low-female - low-male | 8527   | 8527_at   | HGNC:2851  |
| 321 | CST3     | cystatin C                              | 3.5152 | 0.02974  | 1.5267 | 0.46315 | high-male - high-female; high-female - low-female; low-male - high-female; high-male - low-female; high-male - low-male; low-male - low-female | 1471   | 1471_at   | HGNC:2475  |
| 322 | FLNB     | filamin B                               | 3.5077 | 0.029959 | 1.5235 | 0.46511 | high-female - high-male; low-female - high-female; low-male - high-female; low-female - high-male; low-male - high-male; low-female - low-male | 2317   | 2317_at   | HGNC:3755  |
| 323 | TRGV9    | T cell receptor gamma variable 9        | 3.4913 | 0.030441 | 1.5165 | 0.47088 | high-female - high-male; high-female - low-female; high-female - low-male; low-female - high-male; low-male - high-male; low-female - low-male | 6983   | 6983_at   | HGNC:12295 |
| 324 | PSEN1    | presenilin 1                            | 3.4887 | 0.030519 | 1.5154 | 0.47088 | high-male - high-female; high-female - low-female; low-male - high-female; high-male - low-female; high-male - low-male; low-male - low-female | 5663   | 5663_at   | HGNC:9508  |
| 325 | HSD17B12 | hydroxysteroid 17-beta dehydrogenase 12 | 3.4832 | 0.030684 | 1.5131 | 0.47124 | high-male - high-female; low-female - high-female; low-male - high-female; high-male - low-female; high-male - low-male; low-male - low-female | 51144  | 51144_at  | HGNC:18646 |
| 326 | C1orf131 | chromosome 1 open reading frame 131     | 3.4751 | 0.030926 | 1.5097 | 0.47124 | high-male - high-female; low-female - high-female; low-male - high-female; high-male - low-female; high-male - low-male; low-female - low-male | 128061 | 128061_at | HGNC:25332 |
| 327 | MRPL19   | mitochondrial ribosomal protein L19     | 3.4732 | 0.030986 | 1.5088 | 0.47124 | high-male - high-female; low-female - high-female; low-male - high-female; low-female - high-male; high-male - low-male; low-female - low-male | 9801   | 9801_at   | HGNC:14052 |

|     |          |                                                |        |          |        |         |                                                                                                                                                |        |           |            |
|-----|----------|------------------------------------------------|--------|----------|--------|---------|------------------------------------------------------------------------------------------------------------------------------------------------|--------|-----------|------------|
| 328 | REXO2    | RNA exonuclease 2                              | 3.4727 | 0.030999 | 1.5086 | 0.47124 | high-female - high-male; low-female - high-female; high-female - low-male; low-female - high-male; low-male - high-male; low-female - low-male | 25996  | 25996_at  | HGNC:17851 |
| 329 | SERPINB2 | serpin family B member 2                       | 3.4706 | 0.031064 | 1.5077 | 0.47124 | high-male - high-female; low-female - high-female; low-male - high-female; high-male - low-female; high-male - low-male; low-male - low-female | 5055   | 5055_at   | HGNC:8584  |
| 330 | GPR34    | G protein-coupled receptor 34                  | 3.4677 | 0.031151 | 1.5065 | 0.47124 | high-male - high-female; low-female - high-female; low-male - high-female; high-male - low-female; high-male - low-male; low-female - low-male | 2857   | 2857_at   | HGNC:4490  |
| 331 | ZNF597   | zinc finger protein 597                        | 3.4661 | 0.031203 | 1.5058 | 0.47124 | high-male - high-female; low-female - high-female; low-male - high-female; high-male - low-female; high-male - low-male; low-female - low-male | 146434 | 146434_at | HGNC:26573 |
| 332 | TIMM29   | translocase of inner mitochondrial membrane 29 | 3.4622 | 0.031321 | 1.5042 | 0.47161 | high-male - high-female; low-female - high-female; low-male - high-female; low-female - high-male; low-male - high-male; low-female - low-male | 90580  | 90580_at  | HGNC:25152 |
| 333 | KIF11    | kinesin family member 11                       | 3.4526 | 0.031617 | 1.5001 | 0.47277 | high-female - high-male; low-female - high-female; high-female - low-male; low-female - high-male; high-male - low-male; low-female - low-male | 3832   | 3832_at   | HGNC:6388  |
| 334 | SLC24A4  | solute carrier family 24 member 4              | 3.4494 | 0.031716 | 1.4987 | 0.47277 | high-male - high-female; low-female - high-female; low-male - high-female; high-male - low-female; high-male - low-male; low-male - low-female | 123041 | 123041_at | HGNC:10978 |
| 335 | SAP30L   | SAP30 like                                     | 3.4489 | 0.031732 | 1.4985 | 0.47277 | high-male - high-female; low-female - high-female; low-male - high-female; low-female - high-male; high-male - low-male; low-female - low-male | 79685  | 79685_at  | HGNC:25663 |

|     |          |                                         |        |          |        |         |                                                                                                                                                |        |           |            |
|-----|----------|-----------------------------------------|--------|----------|--------|---------|------------------------------------------------------------------------------------------------------------------------------------------------|--------|-----------|------------|
| 336 | ADI1     | acireductone dioxygenase 1              | 3.4464 | 0.031809 | 1.4974 | 0.47277 | high-male - high-female; low-female - high-female; low-male - high-female; high-male - low-female; high-male - low-male; low-female - low-male | 55256  | 55256_at  | HGNC:30576 |
| 337 | TAS2R19  | taste 2 receptor member 19              | 3.4444 | 0.031871 | 1.4966 | 0.47277 | high-female - high-male; low-female - high-female; low-male - high-female; low-female - high-male; low-male - high-male; low-male - low-female | 259294 | 259294_at | HGNC:19108 |
| 338 | CMPK2    | cytidine/uridine monophosphate kinase 2 | 3.4405 | 0.031992 | 1.495  | 0.47316 | high-male - high-female; low-female - high-female; high-female - low-male; low-female - high-male; high-male - low-male; low-female - low-male | 129607 | 129607_at | HGNC:27015 |
| 339 | COG8     | component of oligomeric golgi complex 8 | 3.4202 | 0.032636 | 1.4863 | 0.47833 | high-male - high-female; low-female - high-female; low-male - high-female; low-female - high-male; high-male - low-male; low-female - low-male | 84342  | 84342_at  | HGNC:18623 |
| 340 | DOCK7    | dedicator of cytokinesis 7              | 3.4164 | 0.032758 | 1.4847 | 0.47833 | high-male - high-female; low-female - high-female; low-male - high-female; high-male - low-female; low-male - high-male; low-male - low-female | 85440  | 85440_at  | HGNC:19190 |
| 341 | VEGFA    | vascular endothelial growth factor A    | 3.4162 | 0.032765 | 1.4846 | 0.47833 | high-male - high-female; low-female - high-female; low-male - high-female; high-male - low-female; high-male - low-male; low-male - low-female | 7422   | 7422_at   | HGNC:12680 |
| 342 | C5orf15  | chromosome 5 open reading frame 15      | 3.414  | 0.032836 | 1.4837 | 0.47833 | high-male - high-female; low-female - high-female; low-male - high-female; high-male - low-female; high-male - low-male; low-female - low-male | 56951  | 56951_at  | HGNC:20656 |
| 343 | SERPING1 | serpin family G member 1                | 3.4133 | 0.032857 | 1.4834 | 0.47833 | high-male - high-female; high-female - low-female; high-female - low-male; high-male - low-female; high-male - low-male; low-female - low-male | 710    | 710_at    | HGNC:1228  |

|     |          |                                        |        |          |        |         |                                                                                                                                                |        |           |            |
|-----|----------|----------------------------------------|--------|----------|--------|---------|------------------------------------------------------------------------------------------------------------------------------------------------|--------|-----------|------------|
| 344 | CBL      | Cbl proto-oncogene                     | 3.4115 | 0.032916 | 1.4826 | 0.47833 | high-male - high-female; low-female - high-female; low-male - high-female; high-male - low-female; high-male - low-male; low-male - low-female | 867    | 867_at    | HGNC:1541  |
| 345 | ACTA2    | actin alpha 2, smooth muscle           | 3.401  | 0.033259 | 1.4781 | 0.47977 | high-female - high-male; low-female - high-female; high-female - low-male; low-female - high-male; high-male - low-male; low-female - low-male | 59     | 59_at     | HGNC:130   |
| 346 | RPL22L1  | ribosomal protein L22 like 1           | 3.4003 | 0.033281 | 1.4778 | 0.47977 | high-female - high-male; high-female - low-female; high-female - low-male; low-female - high-male; high-male - low-male; low-female - low-male | 200916 | 200916_at | HGNC:27610 |
| 347 | SLC38A11 | solute carrier family 38 member 11     | 3.3992 | 0.033315 | 1.4774 | 0.47977 | high-female - high-male; low-female - high-female; low-male - high-female; low-female - high-male; low-male - high-male; low-female - low-male | 151258 | 151258_at | HGNC:26836 |
| 348 | PLA2G7   | phospholipase A2 group VII             | 3.3967 | 0.033399 | 1.4763 | 0.47977 | high-male - high-female; low-female - high-female; low-male - high-female; high-male - low-female; high-male - low-male; low-male - low-female | 7941   | 7941_at   | HGNC:9040  |
| 349 | FEN1     | flap structure-specific endonuclease 1 | 3.3874 | 0.033704 | 1.4723 | 0.48199 | high-female - high-male; low-female - high-female; high-female - low-male; low-female - high-male; high-male - low-male; low-female - low-male | 2237   | 2237_at   | HGNC:3650  |
| 350 | CTNNBIP1 | catenin beta interacting protein 1     | 3.3862 | 0.033746 | 1.4718 | 0.48199 | high-male - high-female; low-female - high-female; low-male - high-female; high-male - low-female; high-male - low-male; low-female - low-male | 56998  | 56998_at  | HGNC:16913 |
| 351 | PLCG1    | phospholipase C gamma 1                | 3.3817 | 0.033893 | 1.4699 | 0.4827  | high-female - high-male; low-female - high-female; low-male - high-female; low-female - high-male; low-male - high-male; low-female - low-male | 5335   | 5335_at   | HGNC:9065  |

|     |         |                                         |        |          |        |         |                                                                                                                                                |        |           |            |
|-----|---------|-----------------------------------------|--------|----------|--------|---------|------------------------------------------------------------------------------------------------------------------------------------------------|--------|-----------|------------|
| 352 | ZNF17   | zinc finger protein 17                  | 3.3739 | 0.034156 | 1.4665 | 0.48507 | high-male - high-female; low-female - high-female; low-male - high-female; low-female - high-male; high-male - low-male; low-female - low-male | 7565   | 7565_at   | HGNC:12958 |
| 353 | GBA     | glucosylceramidase beta                 | 3.3688 | 0.034325 | 1.4644 | 0.4861  | high-male - high-female; low-female - high-female; low-male - high-female; high-male - low-female; high-male - low-male; low-male - low-female | 2629   | 2629_at   | HGNC:4177  |
| 354 | CCNA2   | cyclin A2                               | 3.3656 | 0.034435 | 1.463  | 0.48627 | high-female - high-male; low-female - high-female; high-female - low-male; low-female - high-male; high-male - low-male; low-female - low-male | 890    | 890_at    | HGNC:1578  |
| 355 | MIR29A  | microRNA 29a                            | 3.3598 | 0.034633 | 1.4605 | 0.48645 | high-male - high-female; low-female - high-female; low-male - high-female; high-male - low-female; high-male - low-male; low-male - low-female | 407021 | 407021_at | HGNC:31616 |
| 356 | EGLN3   | egl-9 family hypoxia inducible factor 3 | 3.3567 | 0.034737 | 1.4592 | 0.48645 | high-male - high-female; low-female - high-female; low-male - high-female; high-male - low-female; high-male - low-male; low-female - low-male | 112399 | 112399_at | HGNC:14661 |
| 357 | QSOX1   | quiescin sulfhydryl oxidase 1           | 3.3534 | 0.034852 | 1.4578 | 0.48645 | high-male - high-female; low-female - high-female; low-male - high-female; high-male - low-female; high-male - low-male; low-female - low-male | 5768   | 5768_at   | HGNC:9756  |
| 358 | ADARB1  | adenosine deaminase RNA specific B1     | 3.3516 | 0.034912 | 1.457  | 0.48645 | high-female - high-male; low-female - high-female; low-male - high-female; low-female - high-male; low-male - high-male; low-female - low-male | 104    | 104_at    | HGNC:226   |
| 359 | IL13RA1 | interleukin 13 receptor subunit alpha 1 | 3.351  | 0.034934 | 1.4568 | 0.48645 | high-male - high-female; high-female - low-female; low-male - high-female; high-male - low-female; high-male - low-male; low-male - low-female | 3597   | 3597_at   | HGNC:5974  |

|     |            |                                                   |        |          |        |         |                                                                                                                                                |           |              |            |
|-----|------------|---------------------------------------------------|--------|----------|--------|---------|------------------------------------------------------------------------------------------------------------------------------------------------|-----------|--------------|------------|
| 360 | AP3S1      | adaptor related protein complex 3 subunit sigma 1 | 3.3438 | 0.035183 | 1.4537 | 0.48679 | high-male - high-female; high-female - low-female; high-female - low-male; high-male - low-female; high-male - low-male; low-male - low-female | 1176      | 1176_at      | HGNC:2013  |
| 361 | SNORD116-4 | small nucleolar RNA, C/D box 116-4                | 3.3425 | 0.035227 | 1.4531 | 0.48679 | high-male - high-female; low-female - high-female; high-female - low-male; low-female - high-male; high-male - low-male; low-female - low-male | 100033416 | 100033416_at | HGNC:33070 |
| 362 | LY96       | lymphocyte antigen 96                             | 3.3401 | 0.035311 | 1.4521 | 0.48679 | high-male - high-female; high-female - low-female; high-female - low-male; high-male - low-female; high-male - low-male; low-male - low-female | 23643     | 23643_at     | HGNC:17156 |
| 363 | FCRL5      | Fc receptor like 5                                | 3.3391 | 0.035348 | 1.4516 | 0.48679 | high-male - high-female; low-female - high-female; high-female - low-male; low-female - high-male; high-male - low-male; low-female - low-male | 83416     | 83416_at     | HGNC:18508 |
| 364 | TMEM106B   | transmembrane protein 106B                        | 3.3294 | 0.035685 | 1.4475 | 0.48714 | high-male - high-female; low-female - high-female; high-female - low-male; low-female - high-male; high-male - low-male; low-female - low-male | 54664     | 54664_at     | HGNC:22407 |
| 365 | ACSS1      | acyl-CoA synthetase short chain family member 1   | 3.3274 | 0.035756 | 1.4467 | 0.48714 | high-female - high-male; low-female - high-female; low-male - high-female; low-female - high-male; low-male - high-male; low-female - low-male | 84532     | 84532_at     | HGNC:16091 |
| 366 | SF3B4      | splicing factor 3b subunit 4                      | 3.3255 | 0.035823 | 1.4458 | 0.48714 | high-male - high-female; low-female - high-female; low-male - high-female; high-male - low-female; high-male - low-male; low-female - low-male | 10262     | 10262_at     | HGNC:10771 |
| 367 | PDIA4      | protein disulfide isomerase family A member 4     | 3.3253 | 0.035832 | 1.4457 | 0.48714 | high-female - high-male; low-female - high-female; high-female - low-male; low-female - high-male; high-male - low-male; low-female - low-male | 9601      | 9601_at      | HGNC:30167 |

|     |          |                                                 |        |          |        |         |                                                                                                                                                |        |           |            |
|-----|----------|-------------------------------------------------|--------|----------|--------|---------|------------------------------------------------------------------------------------------------------------------------------------------------|--------|-----------|------------|
| 368 | PLD3     | phospholipase D family member 3                 | 3.3245 | 0.035861 | 1.4454 | 0.48714 | high-male - high-female; low-female - high-female; low-male - high-female; high-male - low-female; high-male - low-male; low-male - low-female | 23646  | 23646_at  | HGNC:17158 |
| 369 | SLC25A24 | solute carrier family 25 member 24              | 3.3206 | 0.035996 | 1.4437 | 0.48729 | high-male - high-female; low-female - high-female; low-male - high-female; high-male - low-female; high-male - low-male; low-male - low-female | 29957  | 29957_at  | HGNC:20662 |
| 370 | DHFR2    | dihydrofolate reductase 2                       | 3.3166 | 0.036139 | 1.442  | 0.48729 | high-male - high-female; low-female - high-female; high-female - low-male; low-female - high-male; high-male - low-male; low-female - low-male | 200895 | 200895_at | HGNC:27309 |
| 371 | ZNF28    | zinc finger protein 28                          | 3.3159 | 0.036164 | 1.4417 | 0.48729 | high-male - high-female; low-female - high-female; low-male - high-female; low-female - high-male; high-male - low-male; low-female - low-male | 7576   | 7576_at   | HGNC:13073 |
| 372 | ZNF770   | zinc finger protein 770                         | 3.31   | 0.036375 | 1.4392 | 0.48856 | high-male - high-female; low-female - high-female; low-male - high-female; low-female - high-male; high-male - low-male; low-female - low-male | 54989  | 54989_at  | HGNC:26061 |
| 373 | FAM13A   | family with sequence similarity 13 member A     | 3.3078 | 0.036454 | 1.4383 | 0.48856 | high-female - high-male; low-female - high-female; high-female - low-male; low-female - high-male; low-male - high-male; low-female - low-male | 10144  | 10144_at  | HGNC:19367 |
| 374 | BCL11A   | BAF chromatin remodeling complex subunit BCL11A | 3.3034 | 0.036614 | 1.4363 | 0.4894  | high-male - high-female; low-female - high-female; low-male - high-female; low-female - high-male; high-male - low-male; low-female - low-male | 53335  | 53335_at  | HGNC:13221 |
| 375 | FAM118B  | family with sequence similarity 118 member B    | 3.289  | 0.03714  | 1.4302 | 0.494   | high-male - high-female; low-female - high-female; low-male - high-female; high-male - low-female; high-male - low-male; low-male - low-female | 79607  | 79607_at  | HGNC:26110 |

|     |        |                                        |        |          |        |         |                                                                                                                                                |        |           |            |
|-----|--------|----------------------------------------|--------|----------|--------|---------|------------------------------------------------------------------------------------------------------------------------------------------------|--------|-----------|------------|
| 376 | GUSBP5 | GUSB pseudogene 5                      | 3.2867 | 0.037223 | 1.4292 | 0.494   | high-male - high-female; low-female - high-female; low-male - high-female; low-female - high-male; low-male - high-male; low-female - low-male | 441046 | 441046_at | HGNC:42319 |
| 377 | CD160  | CD160 molecule                         | 3.2859 | 0.037255 | 1.4288 | 0.494   | high-female - high-male; low-female - high-female; high-female - low-male; low-female - high-male; high-male - low-male; low-female - low-male | 11126  | 11126_at  | HGNC:17013 |
| 378 | RBM4B  | RNA binding motif protein 4B           | 3.2825 | 0.037379 | 1.4274 | 0.49434 | high-male - high-female; low-female - high-female; low-male - high-female; low-female - high-male; low-male - high-male; low-female - low-male | 83759  | 83759_at  | HGNC:28842 |
| 379 | H1-5   | H1.5 linker histone, cluster member    | 3.2788 | 0.037518 | 1.4258 | 0.49486 | high-female - high-male; low-female - high-female; high-female - low-male; low-female - high-male; high-male - low-male; low-female - low-male | 3009   | 3009_at   | HGNC:4719  |
| 380 | SPEF2  | sperm flagellar 2                      | 3.2705 | 0.037825 | 1.4222 | 0.49572 | high-female - high-male; low-female - high-female; low-male - high-female; low-female - high-male; low-male - high-male; low-male - low-female | 79925  | 79925_at  | HGNC:26293 |
| 381 | PEX1   | peroxisomal biogenesis factor 1        | 3.2688 | 0.037888 | 1.4215 | 0.49572 | high-female - high-male; low-female - high-female; low-male - high-female; low-female - high-male; low-male - high-male; low-female - low-male | 5189   | 5189_at   | HGNC:8850  |
| 382 | SPOCD1 | SPOC domain containing 1               | 3.267  | 0.037956 | 1.4207 | 0.49572 | high-male - high-female; high-female - low-female; high-female - low-male; high-male - low-female; high-male - low-male; low-female - low-male | 90853  | 90853_at  | HGNC:26338 |
| 383 | DLST   | dihydrolipoamide S-succinyltransferase | 3.2664 | 0.03798  | 1.4204 | 0.49572 | high-male - high-female; low-female - high-female; low-male - high-female; low-female - high-male; low-male - high-male; low-male - low-female | 1743   | 1743_at   | HGNC:2911  |



|     |         |                                             |        |          |        |         |                                                                                                                                                |        |           |            |
|-----|---------|---------------------------------------------|--------|----------|--------|---------|------------------------------------------------------------------------------------------------------------------------------------------------|--------|-----------|------------|
| 384 | ZNF780B | zinc finger protein 780B                    | 3.2593 | 0.038247 | 1.4174 | 0.49735 | high-female - high-male; low-female - high-female; low-male - high-female; low-female - high-male; low-male - high-male; low-female - low-male | 163131 | 163131_at | HGNC:33109 |
| 385 | HLTF    | helicase like transcription factor          | 3.2565 | 0.038355 | 1.4162 | 0.49735 | high-male - high-female; low-female - high-female; low-male - high-female; low-female - high-male; low-male - high-male; low-female - low-male | 6596   | 6596_at   | HGNC:11099 |
| 386 | NHEJ1   | non-homologous end joining factor 1         | 3.2552 | 0.038403 | 1.4156 | 0.49735 | high-male - high-female; low-female - high-female; low-male - high-female; low-female - high-male; low-male - high-male; low-female - low-male | 79840  | 79840_at  | HGNC:25737 |
| 387 | SMIM12  | small integral membrane protein 12          | 3.2492 | 0.038632 | 1.4131 | 0.49902 | high-male - high-female; low-female - high-female; high-female - low-male; high-male - low-female; high-male - low-male; low-female - low-male | 113444 | 113444_at | HGNC:25154 |
| 388 | CNR2    | cannabinoid receptor 2                      | 3.236  | 0.039144 | 1.4073 | 0.50386 | high-male - high-female; low-female - high-female; low-male - high-female; low-female - high-male; low-male - high-male; low-female - low-male | 1269   | 1269_at   | HGNC:2160  |
| 389 | RBMX    | RNA binding motif protein X-linked          | 3.2336 | 0.039236 | 1.4063 | 0.50386 | high-male - high-female; low-female - high-female; low-male - high-female; low-female - high-male; high-male - low-male; low-female - low-male | 27316  | 27316_at  | HGNC:9910  |
| 390 | FEZ2    | fasciculation and elongation protein zeta 2 | 3.2285 | 0.039434 | 1.4041 | 0.50386 | high-male - high-female; low-female - high-female; low-male - high-female; high-male - low-female; high-male - low-male; low-male - low-female | 9637   | 9637_at   | HGNC:3660  |
| 391 | ADTRP   | androgen dependent TFPI regulating protein  | 3.2283 | 0.039443 | 1.404  | 0.50386 | high-female - high-male; low-female - high-female; high-female - low-male; low-female - high-male; high-male - low-male; low-female - low-male | 84830  | 84830_at  | HGNC:21214 |

|     |          |                                                              |        |          |        |         |                                                                                                                                                               |        |           |            |
|-----|----------|--------------------------------------------------------------|--------|----------|--------|---------|---------------------------------------------------------------------------------------------------------------------------------------------------------------|--------|-----------|------------|
| 392 | EIF2AK4  | eukaryotic translation initiation factor 2<br>alpha kinase 4 | 3.2258 | 0.03954  | 1.403  | 0.50386 | high-male - high-female; low-<br>female - high-female; low-male -<br>high-female; low-female - high-<br>male; high-male - low-male; low-<br>female - low-male | 440275 | 440275_at | HGNC:19687 |
| 393 | ZNF506   | zinc finger protein 506                                      | 3.2223 | 0.039678 | 1.4015 | 0.50386 | high-female - high-male; low-<br>female - high-female; low-male -<br>high-female; low-female - high-<br>male; low-male - high-male; low-<br>female - low-male | 440515 | 440515_at | HGNC:23780 |
| 394 | TMC6     | transmembrane channel like 6                                 | 3.2214 | 0.039712 | 1.4011 | 0.50386 | high-female - high-male; low-<br>female - high-female; low-male -<br>high-female; low-female - high-<br>male; low-male - high-male; low-<br>female - low-male | 11322  | 11322_at  | HGNC:18021 |
| 395 | ARHGEF18 | Rho/Rac guanine nucleotide exchange<br>factor 18             | 3.2121 | 0.040082 | 1.397  | 0.50727 | high-female - high-male; low-<br>female - high-female; low-male -<br>high-female; low-female - high-<br>male; low-male - high-male; low-<br>female - low-male | 23370  | 23370_at  | HGNC:17090 |
| 396 | H4C13    | H4 clustered histone 13                                      | 3.2093 | 0.040193 | 1.3959 | 0.50738 | high-male - high-female; low-<br>female - high-female; high-female -<br>low-male; low-female - high-male;<br>high-male - low-male; low-female -<br>low-male   | 8368   | 8368_at   | HGNC:4791  |
| 397 | TSR3     | TSR3 ribosome maturation factor                              | 3.2046 | 0.040383 | 1.3938 | 0.50849 | high-male - high-female; low-<br>female - high-female; high-female -<br>low-male; low-female - high-male;<br>high-male - low-male; low-female -<br>low-male   | 115939 | 115939_at | HGNC:14175 |
| 398 | CLCN4    | chloride voltage-gated channel 4                             | 3.1998 | 0.040575 | 1.3917 | 0.50964 | high-male - high-female; low-<br>female - high-female; low-male -<br>high-female; low-female - high-<br>male; high-male - low-male; low-<br>female - low-male | 1183   | 1183_at   | HGNC:2022  |
| 399 | MPV17L2  | MPV17 mitochondrial inner membrane<br>protein like 2         | 3.1969 | 0.040693 | 1.3905 | 0.50964 | high-male - high-female; low-<br>female - high-female; low-male -<br>high-female; high-male - low-<br>female; high-male - low-male; low-<br>female - low-male | 84769  | 84769_at  | HGNC:28177 |

|     |         |                                          |        |          |        |         |                                                                                                                                                |        |           |            |
|-----|---------|------------------------------------------|--------|----------|--------|---------|------------------------------------------------------------------------------------------------------------------------------------------------|--------|-----------|------------|
| 400 | HK2     | hexokinase 2                             | 3.1948 | 0.040779 | 1.3896 | 0.50964 | high-male - high-female; low-female - high-female; low-male - high-female; high-male - low-female; high-male - low-male; low-male - low-female | 3099   | 3099_at   | HGNC:4923  |
| 401 | CEP170  | centrosomal protein 170                  | 3.1825 | 0.041281 | 1.3843 | 0.51154 | high-male - high-female; low-female - high-female; low-male - high-female; high-male - low-female; high-male - low-male; low-female - low-male | 9859   | 9859_at   | HGNC:28920 |
| 402 | H2BC14  | H2B clustered histone 14                 | 3.1812 | 0.041335 | 1.3837 | 0.51154 | high-female - high-male; high-female - low-female; high-female - low-male; low-female - high-male; high-male - low-male; low-female - low-male | 8342   | 8342_at   | HGNC:4750  |
| 403 | KLHL5   | kelch like family member 5               | 3.178  | 0.041465 | 1.3823 | 0.51154 | high-female - high-male; high-female - low-female; high-female - low-male; high-male - low-female; low-male - high-male; low-male - low-female | 51088  | 51088_at  | HGNC:6356  |
| 404 | BHLHE41 | basic helix-loop-helix family member e41 | 3.1767 | 0.041519 | 1.3818 | 0.51154 | high-female - high-male; low-female - high-female; high-female - low-male; low-female - high-male; low-male - high-male; low-female - low-male | 79365  | 79365_at  | HGNC:16617 |
| 405 | POLR2E  | RNA polymerase II subunit E              | 3.1767 | 0.041519 | 1.3817 | 0.51154 | high-male - high-female; low-female - high-female; high-female - low-male; high-male - low-female; high-male - low-male; low-female - low-male | 5434   | 5434_at   | HGNC:9192  |
| 406 | SNX30   | sorting nexin family member 30           | 3.1761 | 0.041545 | 1.3815 | 0.51154 | high-male - high-female; low-female - high-female; low-male - high-female; high-male - low-female; low-male - high-male; low-male - low-female | 401548 | 401548_at | HGNC:23685 |
| 407 | GBP5    | guanylate binding protein 5              | 3.1699 | 0.041801 | 1.3788 | 0.51184 | high-female - high-male; low-female - high-female; high-female - low-male; low-female - high-male; low-male - high-male; low-female - low-male | 115362 | 115362_at | HGNC:19895 |

|     |             |                                                       |        |          |        |         |                                                                                                                                                |           |              |            |
|-----|-------------|-------------------------------------------------------|--------|----------|--------|---------|------------------------------------------------------------------------------------------------------------------------------------------------|-----------|--------------|------------|
| 408 | SKAP2       | src kinase associated phosphoprotein 2                | 3.1697 | 0.04181  | 1.3787 | 0.51184 | high-male - high-female; low-female - high-female; low-male - high-female; high-male - low-female; high-male - low-male; low-male - low-female | 8935      | 8935_at      | HGNC:15687 |
| 409 | TPMT        | thiopurine S-methyltransferase                        | 3.1681 | 0.041877 | 1.378  | 0.51184 | high-male - high-female; high-female - low-female; low-male - high-female; high-male - low-female; high-male - low-male; low-male - low-female | 7172      | 7172_at      | HGNC:12014 |
| 410 | PRMT7       | protein arginine methyltransferase 7                  | 3.1595 | 0.04224  | 1.3743 | 0.51404 | high-female - high-male; low-female - high-female; low-male - high-female; low-female - high-male; low-male - high-male; low-female - low-male | 54496     | 54496_at     | HGNC:25557 |
| 411 | SNORD116-24 | small nucleolar RNA, C/D box 116-24                   | 3.1589 | 0.042263 | 1.374  | 0.51404 | high-female - high-male; low-female - high-female; high-female - low-male; low-female - high-male; high-male - low-male; low-female - low-male | 100033435 | 100033435_at | HGNC:33090 |
| 412 | USP6NL      | USP6 N-terminal like                                  | 3.142  | 0.042982 | 1.3667 | 0.52062 | high-male - high-female; low-female - high-female; low-male - high-female; low-female - high-male; high-male - low-male; low-female - low-male | 9712      | 9712_at      | HGNC:16858 |
| 413 | GFI1        | growth factor independent 1 transcriptional repressor | 3.1394 | 0.043095 | 1.3656 | 0.52062 | high-female - high-male; low-female - high-female; high-female - low-male; low-female - high-male; high-male - low-male; low-female - low-male | 2672      | 2672_at      | HGNC:4237  |
| 414 | PPIA        | peptidylprolyl isomerase A                            | 3.1365 | 0.043219 | 1.3643 | 0.52062 | high-male - high-female; low-female - high-female; low-male - high-female; low-female - high-male; high-male - low-male; low-female - low-male | 5478      | 5478_at      | HGNC:9253  |
| 415 | DDHD2       | DDHD domain containing 2                              | 3.1353 | 0.043269 | 1.3638 | 0.52062 | high-male - high-female; low-female - high-female; low-male - high-female; low-female - high-male; low-male - high-male; low-female - low-male | 23259     | 23259_at     | HGNC:29106 |

|     |         |                                                   |        |          |        |         |                                                                                                                                                |        |           |            |
|-----|---------|---------------------------------------------------|--------|----------|--------|---------|------------------------------------------------------------------------------------------------------------------------------------------------|--------|-----------|------------|
| 416 | TCN2    | transcobalamin 2                                  | 3.1341 | 0.043324 | 1.3633 | 0.52062 | high-male - high-female; low-female - high-female; low-male - high-female; high-male - low-female; high-male - low-male; low-male - low-female | 6948   | 6948_at   | HGNC:11653 |
| 417 | CD40LG  | CD40 ligand                                       | 3.1311 | 0.043451 | 1.362  | 0.52089 | high-female - high-male; low-female - high-female; high-female - low-male; low-female - high-male; high-male - low-male; low-female - low-male | 959    | 959_at    | HGNC:11935 |
| 418 | ZNF615  | zinc finger protein 615                           | 3.127  | 0.043633 | 1.3602 | 0.52182 | high-male - high-female; low-female - high-female; low-male - high-female; high-male - low-female; high-male - low-male; low-female - low-male | 284370 | 284370_at | HGNC:24740 |
| 419 | OSGEPL1 | O-sialoglycoprotein endopeptidase like 1          | 3.1203 | 0.043924 | 1.3573 | 0.52285 | high-female - high-male; low-female - high-female; low-male - high-female; low-female - high-male; low-male - high-male; low-female - low-male | 64172  | 64172_at  | HGNC:23075 |
| 420 | MFSD1   | major facilitator superfamily domain containing 1 | 3.1168 | 0.044079 | 1.3558 | 0.52285 | high-male - high-female; high-female - low-female; high-female - low-male; high-male - low-female; high-male - low-male; low-male - low-female | 64747  | 64747_at  | HGNC:25874 |
| 421 | NCEH1   | neutral cholesterol ester hydrolase 1             | 3.1126 | 0.044263 | 1.354  | 0.52285 | high-male - high-female; low-female - high-female; low-male - high-female; high-male - low-female; high-male - low-male; low-male - low-female | 57552  | 57552_at  | HGNC:29260 |
| 422 | TIMP1   | TIMP metalloproteinase inhibitor 1                | 3.1069 | 0.044517 | 1.3515 | 0.52285 | high-male - high-female; high-female - low-female; high-female - low-male; high-male - low-female; high-male - low-male; low-male - low-female | 7076   | 7076_at   | HGNC:11820 |
| 423 | FAM214A | family with sequence similarity 214 member A      | 3.1042 | 0.044638 | 1.3503 | 0.52285 | high-female - high-male; low-female - high-female; low-male - high-female; low-female - high-male; low-male - high-male; low-female - low-male | 56204  | 56204_at  | HGNC:25609 |

|     |          |                                                  |        |          |        |         |                                                                                                                                                |        |           |            |
|-----|----------|--------------------------------------------------|--------|----------|--------|---------|------------------------------------------------------------------------------------------------------------------------------------------------|--------|-----------|------------|
| 424 | PAPSS2   | 3'-phosphoadenosine 5'-phosphosulfate synthase 2 | 3.1032 | 0.044682 | 1.3499 | 0.52285 | high-male - high-female; high-female - low-female; high-female - low-male; high-male - low-female; high-male - low-male; low-male - low-female | 9060   | 9060_at   | HGNC:8604  |
| 425 | C9orf64  | chromosome 9 open reading frame 64               | 3.1021 | 0.044733 | 1.3494 | 0.52285 | high-male - high-female; low-female - high-female; low-male - high-female; high-male - low-female; high-male - low-male; low-male - low-female | 84267  | 84267_at  | HGNC:28144 |
| 426 | CLUAP1   | clusterin associated protein 1                   | 3.102  | 0.044737 | 1.3493 | 0.52285 | high-male - high-female; low-female - high-female; low-male - high-female; low-female - high-male; low-male - high-male; low-female - low-male | 23059  | 23059_at  | HGNC:19009 |
| 427 | PRNP     | prion protein                                    | 3.1011 | 0.044778 | 1.3489 | 0.52285 | high-male - high-female; low-female - high-female; low-male - high-female; high-male - low-female; high-male - low-male; low-female - low-male | 5621   | 5621_at   | HGNC:9449  |
| 428 | CD28     | CD28 molecule                                    | 3.1001 | 0.04482  | 1.3485 | 0.52285 | high-female - high-male; low-female - high-female; low-male - high-female; low-female - high-male; low-male - high-male; low-female - low-male | 940    | 940_at    | HGNC:1653  |
| 429 | TYMS     | thymidylate synthetase                           | 3.0975 | 0.044937 | 1.3474 | 0.52285 | high-female - high-male; low-female - high-female; high-female - low-male; low-female - high-male; high-male - low-male; low-female - low-male | 7298   | 7298_at   | HGNC:12441 |
| 430 | PBX3     | PBX homeobox 3                                   | 3.0967 | 0.044974 | 1.347  | 0.52285 | high-male - high-female; low-female - high-female; low-male - high-female; high-male - low-female; high-male - low-male; low-male - low-female | 5090   | 5090_at   | HGNC:8634  |
| 431 | MIR181B1 | microRNA 181b-1                                  | 3.0904 | 0.045258 | 1.3443 | 0.52316 | high-male - high-female; low-female - high-female; low-male - high-female; high-male - low-female; high-male - low-male; low-female - low-male | 406955 | 406955_at | HGNC:31550 |

|     |         |                                                           |        |          |        |         |                                                                                                                                                |        |           |            |
|-----|---------|-----------------------------------------------------------|--------|----------|--------|---------|------------------------------------------------------------------------------------------------------------------------------------------------|--------|-----------|------------|
| 432 | CWF19L1 | CWF19 like cell cycle control factor 1                    | 3.0865 | 0.045434 | 1.3426 | 0.52316 | high-male - high-female; low-female - high-female; low-male - high-female; high-male - low-female; high-male - low-male; low-female - low-male | 55280  | 55280_at  | HGNC:25613 |
| 433 | TAS2R10 | taste 2 receptor member 10                                | 3.0832 | 0.045588 | 1.3412 | 0.52316 | high-female - high-male; low-female - high-female; low-male - high-female; low-female - high-male; low-male - high-male; low-male - low-female | 50839  | 50839_at  | HGNC:14918 |
| 434 | TRGV3   | T cell receptor gamma variable 3                          | 3.081  | 0.045688 | 1.3402 | 0.52316 | high-male - high-female; low-female - high-female; low-male - high-female; high-male - low-female; high-male - low-male; low-male - low-female | 6976   | 6976_at   | HGNC:12288 |
| 435 | EIF2AK3 | eukaryotic translation initiation factor 2 alpha kinase 3 | 3.0796 | 0.045753 | 1.3396 | 0.52316 | high-male - high-female; low-female - high-female; low-male - high-female; low-female - high-male; high-male - low-male; low-female - low-male | 9451   | 9451_at   | HGNC:3255  |
| 436 | PGAP1   | post-GPI attachment to proteins inositol deacylase 1      | 3.0708 | 0.046155 | 1.3358 | 0.52316 | high-female - high-male; low-female - high-female; high-female - low-male; low-female - high-male; low-male - high-male; low-female - low-male | 80055  | 80055_at  | HGNC:25712 |
| 437 | MT1DP   | metallothionein 1D, pseudogene                            | 3.0704 | 0.046175 | 1.3356 | 0.52316 | high-male - high-female; low-female - high-female; high-female - low-male; low-female - high-male; high-male - low-male; low-female - low-male | 326343 | 326343_at | HGNC:7396  |
| 438 | PSENEN  | presenilin enhancer, gamma-secretase subunit              | 3.0668 | 0.046343 | 1.334  | 0.52316 | high-male - high-female; high-female - low-female; high-female - low-male; high-male - low-female; high-male - low-male; low-male - low-female | 55851  | 55851_at  | HGNC:30100 |
| 439 | H2AC17  | H2A clustered histone 17                                  | 3.0634 | 0.0465   | 1.3325 | 0.52316 | high-male - high-female; low-female - high-female; high-female - low-male; high-male - low-female; high-male - low-male; low-female - low-male | 8336   | 8336_at   | HGNC:4735  |

|     |              |                                 |        |          |        |         |                                                                                                                                                |           |              |            |
|-----|--------------|---------------------------------|--------|----------|--------|---------|------------------------------------------------------------------------------------------------------------------------------------------------|-----------|--------------|------------|
| 440 | IFT57        | intraflagellar transport 57     | 3.0601 | 0.046655 | 1.3311 | 0.52316 | high-male - high-female; low-female - high-female; low-male - high-female; low-female - high-male; high-male - low-male; low-female - low-male | 55081     | 55081_at     | HGNC:17367 |
| 441 | SLFN12       | schlafen family member 12       | 3.0587 | 0.046721 | 1.3305 | 0.52316 | high-male - high-female; low-female - high-female; low-male - high-female; high-male - low-female; high-male - low-male; low-male - low-female | 55106     | 55106_at     | HGNC:25500 |
| 442 | TMEM150B     | transmembrane protein 150B      | 3.0579 | 0.046756 | 1.3302 | 0.52316 | high-male - high-female; low-female - high-female; low-male - high-female; high-male - low-female; high-male - low-male; low-female - low-male | 284417    | 284417_at    | HGNC:34415 |
| 443 | YAE1         | YAE1 maturation factor of ABCE1 | 3.0579 | 0.04676  | 1.3301 | 0.52316 | high-male - high-female; low-female - high-female; low-male - high-female; high-male - low-female; high-male - low-male; low-female - low-male | 57002     | 57002_at     | HGNC:24857 |
| 444 | LOC100128398 | uncharacterized LOC100128398    | 3.0546 | 0.046911 | 1.3287 | 0.52316 | high-male - high-female; low-female - high-female; low-male - high-female; low-female - high-male; low-male - high-male; low-female - low-male | 100128398 | 100128398_at |            |
| 445 | TSGA10       | testis specific 10              | 3.0543 | 0.046928 | 1.3286 | 0.52316 | high-male - high-female; low-female - high-female; low-male - high-female; low-female - high-male; high-male - low-male; low-female - low-male | 80705     | 80705_at     | HGNC:14927 |
| 446 | GUSBP1       | GUSB pseudogene 1               | 3.053  | 0.046989 | 1.328  | 0.52316 | high-female - high-male; high-female - low-female; high-female - low-male; high-male - low-female; low-male - high-male; low-male - low-female | 728411    | 728411_at    | HGNC:13670 |
| 447 | WDR89        | WD repeat domain 89             | 3.0485 | 0.047199 | 1.3261 | 0.52316 | high-female - high-male; low-female - high-female; high-female - low-male; low-female - high-male; low-male - high-male; low-female - low-male | 112840    | 112840_at    | HGNC:20489 |



|     |        |                                                 |        |          |        |         |                                                                                                                                                |       |          |            |
|-----|--------|-------------------------------------------------|--------|----------|--------|---------|------------------------------------------------------------------------------------------------------------------------------------------------|-------|----------|------------|
| 448 | ERMP1  | endoplasmic reticulum metalloproteinase 1       | 3.0461 | 0.047313 | 1.325  | 0.52316 | high-female - high-male; low-female - high-female; low-male - high-female; low-female - high-male; low-male - high-male; low-female - low-male | 79956 | 79956_at | HGNC:23703 |
| 449 | MRPL35 | mitochondrial ribosomal protein L35             | 3.0456 | 0.04734  | 1.3248 | 0.52316 | high-female - high-male; low-female - high-female; high-female - low-male; low-female - high-male; high-male - low-male; low-female - low-male | 51318 | 51318_at | HGNC:14489 |
| 450 | SAMM50 | SAMM50 sorting and assembly machinery component | 3.0453 | 0.047354 | 1.3246 | 0.52316 | high-male - high-female; low-female - high-female; low-male - high-female; high-male - low-female; high-male - low-male; low-male - low-female | 25813 | 25813_at | HGNC:24276 |
| 451 | SNAPIN | SNAP associated protein                         | 3.0452 | 0.04736  | 1.3246 | 0.52316 | high-male - high-female; low-female - high-female; low-male - high-female; high-male - low-female; high-male - low-male; low-female - low-male | 23557 | 23557_at | HGNC:17145 |
| 452 | H3C12  | H3 clustered histone 12                         | 3.0429 | 0.047468 | 1.3236 | 0.52316 | high-female - high-male; low-female - high-female; high-female - low-male; low-female - high-male; high-male - low-male; low-female - low-male | 8356  | 8356_at  | HGNC:4774  |
| 453 | MYC    | MYC proto-oncogene, bHLH transcription factor   | 3.0415 | 0.047533 | 1.323  | 0.52316 | high-female - high-male; low-female - high-female; high-female - low-male; low-female - high-male; low-male - high-male; low-female - low-male | 4609  | 4609_at  | HGNC:7553  |
| 454 | KYNU   | kynureninase                                    | 3.0349 | 0.047853 | 1.3201 | 0.52316 | high-male - high-female; low-female - high-female; low-male - high-female; high-male - low-female; high-male - low-male; low-male - low-female | 8942  | 8942_at  | HGNC:6469  |
| 455 | PPIG   | peptidylprolyl isomerase G                      | 3.0334 | 0.047923 | 1.3195 | 0.52316 | high-male - high-female; low-female - high-female; high-female - low-male; low-female - high-male; high-male - low-male; low-female - low-male | 9360  | 9360_at  | HGNC:14650 |

|     |          |                                                           |        |          |        |         |                                                                                                                                                |        |           |            |
|-----|----------|-----------------------------------------------------------|--------|----------|--------|---------|------------------------------------------------------------------------------------------------------------------------------------------------|--------|-----------|------------|
| 456 | SNORD48  | small nucleolar RNA, C/D box 48                           | 3.0325 | 0.047966 | 1.3191 | 0.52316 | high-female - high-male; low-female - high-female; high-female - low-male; low-female - high-male; low-male - high-male; low-female - low-male | 26801  | 26801_at  | HGNC:10188 |
| 457 | METTL21A | methyltransferase like 21A                                | 3.0298 | 0.048096 | 1.3179 | 0.52316 | high-male - high-female; low-female - high-female; low-male - high-female; high-male - low-female; high-male - low-male; low-female - low-male | 151194 | 151194_at | HGNC:30476 |
| 458 | NEU1     | neuraminidase 1                                           | 3.0298 | 0.048097 | 1.3179 | 0.52316 | high-male - high-female; low-female - high-female; low-male - high-female; high-male - low-female; high-male - low-male; low-female - low-male | 4758   | 4758_at   | HGNC:7758  |
| 459 | NOC3L    | NOC3 like DNA replication regulator                       | 3.0292 | 0.048123 | 1.3176 | 0.52316 | high-male - high-female; low-female - high-female; low-male - high-female; low-female - high-male; low-male - high-male; low-female - low-male | 64318  | 64318_at  | HGNC:24034 |
| 460 | JUP      | junction plakoglobin                                      | 3.0289 | 0.04814  | 1.3175 | 0.52316 | high-male - high-female; high-female - low-female; high-female - low-male; high-male - low-female; high-male - low-male; low-female - low-male | 3728   | 3728_at   | HGNC:6207  |
| 461 | OSGIN2   | oxidative stress induced growth inhibitor family member 2 | 3.0242 | 0.048369 | 1.3154 | 0.52361 | high-male - high-female; low-female - high-female; low-male - high-female; low-female - high-male; high-male - low-male; low-female - low-male | 734    | 734_at    | HGNC:1355  |
| 462 | GAS7     | growth arrest specific 7                                  | 3.0144 | 0.048845 | 1.3112 | 0.52361 | high-male - high-female; low-female - high-female; low-male - high-female; high-male - low-female; high-male - low-male; low-male - low-female | 8522   | 8522_at   | HGNC:4169  |
| 463 | ZFP30    | ZFP30 zinc finger protein                                 | 3.0139 | 0.048873 | 1.3109 | 0.52361 | high-female - high-male; low-female - high-female; low-male - high-female; low-female - high-male; low-male - high-male; low-female - low-male | 22835  | 22835_at  | HGNC:29555 |

|     |          |                                                             |        |          |        |         |                                                                                                                                                |           |              |            |
|-----|----------|-------------------------------------------------------------|--------|----------|--------|---------|------------------------------------------------------------------------------------------------------------------------------------------------|-----------|--------------|------------|
| 464 | SIPA1L3  | signal induced proliferation associated 1 like 3            | 3.0128 | 0.048927 | 1.3104 | 0.52361 | high-male - high-female; low-female - high-female; low-male - high-female; low-female - high-male; low-male - high-male; low-female - low-male | 23094     | 23094_at     | HGNC:23801 |
| 465 | SNORA80E | small nucleolar RNA, H/ACA box 80E                          | 3.0113 | 0.049    | 1.3098 | 0.52361 | high-female - high-male; low-female - high-female; high-female - low-male; low-female - high-male; high-male - low-male; low-female - low-male | 677823    | 677823_at    | HGNC:32635 |
| 466 | RNF135   | ring finger protein 135                                     | 3.0111 | 0.049011 | 1.3097 | 0.52361 | high-male - high-female; low-female - high-female; low-male - high-female; high-male - low-female; high-male - low-male; low-male - low-female | 84282     | 84282_at     | HGNC:21158 |
| 467 | PATJ     | PATJ crumbs cell polarity complex component                 | 3.0099 | 0.04907  | 1.3092 | 0.52361 | high-female - high-male; low-female - high-female; low-male - high-female; low-female - high-male; low-male - high-male; low-female - low-male | 10207     | 10207_at     | HGNC:28881 |
| 468 | DCLRE1C  | DNA cross-link repair 1C                                    | 3.0041 | 0.049358 | 1.3066 | 0.52361 | high-male - high-female; low-female - high-female; low-male - high-female; low-female - high-male; low-male - high-male; low-female - low-male | 64421     | 64421_at     | HGNC:17642 |
| 469 | NEMP2    | nuclear envelope integral membrane protein 2                | 3.0037 | 0.049376 | 1.3065 | 0.52361 | high-male - high-female; low-female - high-female; low-male - high-female; low-female - high-male; low-male - high-male; low-female - low-male | 100131211 | 100131211_at | HGNC:33700 |
| 470 | IFIT5    | interferon induced protein with tetratricopeptide repeats 5 | 3.0032 | 0.049404 | 1.3062 | 0.52361 | high-male - high-female; low-female - high-female; high-female - low-male; low-female - high-male; high-male - low-male; low-female - low-male | 24138     | 24138_at     | HGNC:13328 |
| 471 | CHPT1    | choline phosphotransferase 1                                | 3.0011 | 0.049507 | 1.3053 | 0.52361 | high-male - high-female; low-female - high-female; low-male - high-female; high-male - low-female; low-male - high-male; low-male - low-female | 56994     | 56994_at     | HGNC:17852 |

|              |               |                                           |                |                |                   |            |                                                                                                                                                |                |               |               |
|--------------|---------------|-------------------------------------------|----------------|----------------|-------------------|------------|------------------------------------------------------------------------------------------------------------------------------------------------|----------------|---------------|---------------|
| 472          | BTLA          | B and T lymphocyte associated             | 2.9987         | 0.049626       | 1.3043            | 0.52361    | high-female - high-male; low-female - high-female; low-male - high-female; low-female - high-male; low-male - high-male; low-female - low-male | 151888         | 151888_at     | HGNC:21087    |
| 473          | PLK1          | polo like kinase 1                        | 2.9982         | 0.049648       | 1.3041            | 0.52361    | high-female - high-male; low-female - high-female; high-female - low-male; low-female - high-male; high-male - low-male; low-female - low-male | 5347           | 5347_at       | HGNC:9077     |
| 474          | GPX1          | glutathione peroxidase 1                  | 2.9971         | 0.049708       | 1.3036            | 0.52361    | high-male - high-female; low-female - high-female; low-male - high-female; high-male - low-female; high-male - low-male; low-male - low-female | 2876           | 2876_at       | HGNC:4553     |
| 475          | RIC1          | RIC1 homolog, RAB6A GEF complex partner 1 | 2.9927         | 0.049925       | 1.3017            | 0.52361    | high-male - high-female; low-female - high-female; low-male - high-female; high-male - low-female; low-male - high-male; low-male - low-female | 57589          | 57589_at      | HGNC:17686    |
| 476          | SCARNA5       | small Cajal body-specific RNA 5           | 2.9916         | 0.04998        | 1.3012            | 0.52361    | high-female - high-male; low-female - high-female; high-female - low-male; low-female - high-male; high-male - low-male; low-female - low-male | 677775         | 677775_at     | HGNC:32561    |
|              | <b>Data2</b>  |                                           |                |                |                   |            |                                                                                                                                                |                |               |               |
| <b>S.No.</b> | <b>Symbol</b> | <b>Name</b>                               | <b>f.value</b> | <b>p.value</b> | <b>X.log10.p.</b> | <b>FDR</b> | <b>Fisher.s.LSD</b>                                                                                                                            | <b>SPOT_ID</b> | <b>REFSEQ</b> | <b>GB_ACC</b> |

|   |         |                                          |        |          |        |            |                                                                                                                                                                                                                                                                                                                                                                                                                                           |               |           |           |
|---|---------|------------------------------------------|--------|----------|--------|------------|-------------------------------------------------------------------------------------------------------------------------------------------------------------------------------------------------------------------------------------------------------------------------------------------------------------------------------------------------------------------------------------------------------------------------------------------|---------------|-----------|-----------|
| 1 | USP9Y   | ubiquitin specific peptidase 9, Y-linked | 13.335 | 2.55E-08 | 7.5936 | 0.00012743 | High_Male - High_Female;<br>Low_Female - High_Female;<br>Low_Male - High_Female;<br>Medium_Female - High_Female;<br>Medium_Male - High_Female;<br>High_Male - Low_Female;<br>Low_Male - High_Male;<br>High_Male - Medium_Female;<br>Medium_Male - High_Male;<br>Low_Male - Low_Female;<br>Low_Female - Medium_Female;<br>Medium_Male - Low_Female;<br>Low_Male - Medium_Female;<br>Low_Male - Medium_Male;<br>Medium_Male - Medium_Female | A_33_P3217700 | NM_004654 | NM_004654 |
| 2 | TXLNG2P | taxilin gamma 2, pseudogene              | 11.762 | 1.38E-07 | 6.8616 | 0.00019628 | High_Male - High_Female;<br>Low_Female - High_Female;<br>Low_Male - High_Female;<br>Medium_Female - High_Female;<br>Medium_Male - High_Female;<br>High_Male - Low_Female;<br>Low_Male - High_Male;<br>High_Male - Medium_Female;<br>Medium_Male - High_Male;<br>Low_Male - Low_Female;<br>Low_Female - Medium_Female;<br>Medium_Male - Low_Female;<br>Low_Male - Medium_Female;<br>Low_Male - Medium_Male;<br>Medium_Male - Medium_Female | A_33_P3260223 | NR_045128 | NR_045128 |

|   |         |                                                       |        |          |        |            |                                                                                                                                                                                                                                                                                                                                                                                                                                           |                |           |           |
|---|---------|-------------------------------------------------------|--------|----------|--------|------------|-------------------------------------------------------------------------------------------------------------------------------------------------------------------------------------------------------------------------------------------------------------------------------------------------------------------------------------------------------------------------------------------------------------------------------------------|----------------|-----------|-----------|
| 3 | TXLNG2P | taxilin gamma 2, pseudogene                           | 11.649 | 1.56E-07 | 6.8072 | 0.00019628 | High_Male - High_Female;<br>Low_Female - High_Female;<br>Low_Male - High_Female;<br>Medium_Female - High_Female;<br>Medium_Male - High_Female;<br>High_Male - Low_Female;<br>Low_Male - High_Male;<br>High_Male - Medium_Female;<br>Medium_Male - High_Male;<br>Low_Male - Low_Female;<br>Low_Female - Medium_Female;<br>Medium_Male - Low_Female;<br>Low_Male - Medium_Female;<br>Medium_Male - Low_Male;<br>Medium_Male - Medium_Female | A_23_P364792   | NR_045129 | NR_045129 |
| 4 | XIST    | X (inactive)-specific transcript (non-protein coding) | 11.642 | 1.57E-07 | 6.8039 | 0.00019628 | High_Female - High_Male;<br>High_Female - Low_Female;<br>High_Female - Low_Male;<br>High_Female - Medium_Female;<br>High_Female - Medium_Male;<br>Low_Female - High_Male;<br>High_Male - Low_Male;<br>Medium_Female - High_Male;<br>High_Male - Medium_Male;<br>Low_Female - Low_Male;<br>Medium_Female - Low_Female;<br>Low_Female - Medium_Male;<br>Medium_Female - Low_Male;<br>Medium_Male - Low_Male;<br>Medium_Female - Medium_Male | A_19_P00323692 | NR_001564 | NR_001564 |

|   |             |                                                       |        |          |        |            |                                                                                                                                                                                                                                                                                                                                                                                                                                           |                     |           |           |
|---|-------------|-------------------------------------------------------|--------|----------|--------|------------|-------------------------------------------------------------------------------------------------------------------------------------------------------------------------------------------------------------------------------------------------------------------------------------------------------------------------------------------------------------------------------------------------------------------------------------------|---------------------|-----------|-----------|
| 5 | EIF1AY      | eukaryotic translation initiation factor 1A, Y-linked | 11.196 | 2.59E-07 | 6.5865 | 0.00025823 | High_Male - High_Female;<br>Low_Female - High_Female;<br>Low_Male - High_Female;<br>Medium_Female - High_Female;<br>Medium_Male - High_Female;<br>High_Male - Low_Female;<br>Low_Male - High_Male;<br>High_Male - Medium_Female;<br>Medium_Male - High_Male;<br>Low_Male - Low_Female;<br>Low_Female - Medium_Female;<br>Medium_Male - Low_Female;<br>Low_Male - Medium_Female;<br>Low_Male - Medium_Male;<br>Medium_Male - Medium_Female | A_24_P237511        | NM_004681 | NM_004681 |
| 6 | XLOC_008323 |                                                       | 10.852 | 3.84E-07 | 6.416  | 0.00025823 | High_Male - High_Female;<br>Low_Female - High_Female;<br>Low_Male - High_Female;<br>Medium_Female - High_Female;<br>Medium_Male - High_Female;<br>High_Male - Low_Female;<br>Low_Male - High_Male;<br>High_Male - Medium_Female;<br>Medium_Male - High_Male;<br>Low_Male - Low_Female;<br>Low_Female - Medium_Female;<br>Medium_Male - Low_Female;<br>Low_Male - Medium_Female;<br>Low_Male - Medium_Male;<br>Medium_Male - Medium_Female | linc TCONS_00017647 |           |           |

|   |      |                                                       |        |          |        |            |                                                                                                                                                                                                                                                                                                                                                                                                                                           |                |           |           |
|---|------|-------------------------------------------------------|--------|----------|--------|------------|-------------------------------------------------------------------------------------------------------------------------------------------------------------------------------------------------------------------------------------------------------------------------------------------------------------------------------------------------------------------------------------------------------------------------------------------|----------------|-----------|-----------|
| 7 | XIST | X (inactive)-specific transcript (non-protein coding) | 10.814 | 4.01E-07 | 6.3973 | 0.00025823 | High_Female - High_Male;<br>High_Female - Low_Female;<br>High_Female - Low_Male;<br>High_Female - Medium_Female;<br>High_Female - Medium_Male;<br>Low_Female - High_Male;<br>High_Male - Low_Male;<br>Medium_Female - High_Male;<br>High_Male - Medium_Male;<br>Low_Female - Low_Male;<br>Medium_Female - Low_Female;<br>Low_Female - Medium_Male;<br>Medium_Female - Low_Male;<br>Medium_Male - Low_Male;<br>Medium_Female - Medium_Male | A_19_P00319151 | NR_001564 | NR_001564 |
| 8 | XIST | X (inactive)-specific transcript (non-protein coding) | 10.787 | 4.13E-07 | 6.3838 | 0.00025823 | High_Female - High_Male;<br>High_Female - Low_Female;<br>High_Female - Low_Male;<br>High_Female - Medium_Female;<br>High_Female - Medium_Male;<br>Low_Female - High_Male;<br>High_Male - Low_Male;<br>Medium_Female - High_Male;<br>High_Male - Medium_Male;<br>Low_Female - Low_Male;<br>Medium_Female - Low_Female;<br>Low_Female - Medium_Male;<br>Medium_Female - Low_Male;<br>Medium_Male - Low_Male;<br>Medium_Female - Medium_Male | A_19_P00331623 | NR_001564 | NR_001564 |



|    |       |                                                       |        |          |        |            |                                                                                                                                                                                                                                                                                                                                                                                                                                           |               |           |           |
|----|-------|-------------------------------------------------------|--------|----------|--------|------------|-------------------------------------------------------------------------------------------------------------------------------------------------------------------------------------------------------------------------------------------------------------------------------------------------------------------------------------------------------------------------------------------------------------------------------------------|---------------|-----------|-----------|
| 9  | XIST  | X (inactive)-specific transcript (non-protein coding) | 10.653 | 4.83E-07 | 6.3164 | 0.00026808 | High_Female - High_Male;<br>High_Female - Low_Female;<br>High_Female - Low_Male;<br>High_Female - Medium_Female;<br>High_Female - Medium_Male;<br>Low_Female - High_Male;<br>High_Male - Low_Male;<br>Medium_Female - High_Male;<br>High_Male - Medium_Male;<br>Low_Female - Low_Male;<br>Medium_Female - Low_Female;<br>Low_Female - Medium_Male;<br>Medium_Female - Low_Male;<br>Medium_Male - Low_Male;<br>Medium_Female - Medium_Male | A_21_P0006538 | NR_001564 | NR_001564 |
| 10 | KDM5D | lysine (K)-specific demethylase 5D                    | 10.518 | 5.65E-07 | 6.2483 | 0.0002822  | High_Male - High_Female;<br>Low_Female - High_Female;<br>Low_Male - High_Female;<br>Medium_Female - High_Female;<br>Medium_Male - High_Female;<br>High_Male - Low_Female;<br>Low_Male - High_Male;<br>High_Male - Medium_Female;<br>Medium_Male - High_Male;<br>Low_Male - Low_Female;<br>Low_Female - Medium_Female;<br>Medium_Male - Low_Female;<br>Low_Male - Medium_Female;<br>Medium_Male - Low_Male;<br>Medium_Male - Medium_Female | A_23_P137238  | NM_004653 | NM_004653 |

|    |      |                                                       |        |          |        |            |                                                                                                                                                                                                                                                                                                                                                                                                                                           |                |           |           |
|----|------|-------------------------------------------------------|--------|----------|--------|------------|-------------------------------------------------------------------------------------------------------------------------------------------------------------------------------------------------------------------------------------------------------------------------------------------------------------------------------------------------------------------------------------------------------------------------------------------|----------------|-----------|-----------|
| 11 | XIST | X (inactive)-specific transcript (non-protein coding) | 10.364 | 6.76E-07 | 6.1698 | 0.00030737 | High_Female - High_Male;<br>High_Female - Low_Female;<br>High_Female - Low_Male;<br>High_Female - Medium_Female;<br>High_Female - Medium_Male;<br>Low_Female - High_Male;<br>High_Male - Low_Male;<br>Medium_Female - High_Male;<br>High_Male - Medium_Male;<br>Low_Female - Low_Male;<br>Medium_Female - Low_Female;<br>Low_Female - Medium_Male;<br>Medium_Female - Low_Male;<br>Low_Male - Medium_Male;<br>Medium_Female - Medium_Male | A_19_P00329511 | NR_001564 | NR_001564 |
| 12 | XIST | X (inactive)-specific transcript (non-protein coding) | 10.191 | 8.29E-07 | 6.0813 | 0.00031531 | High_Female - High_Male;<br>High_Female - Low_Female;<br>High_Female - Low_Male;<br>High_Female - Medium_Female;<br>High_Female - Medium_Male;<br>Low_Female - High_Male;<br>High_Male - Low_Male;<br>Medium_Female - High_Male;<br>High_Male - Medium_Male;<br>Low_Female - Low_Male;<br>Medium_Female - Low_Female;<br>Low_Female - Medium_Male;<br>Medium_Female - Low_Male;<br>Low_Male - Medium_Male;<br>Medium_Female - Medium_Male | A_19_P00802872 | NR_001564 | NR_001564 |

|    |        |                                  |        |          |        |            |                                                                                                                                                                                                                                                                                                                                                                                                                                           |               |              |              |
|----|--------|----------------------------------|--------|----------|--------|------------|-------------------------------------------------------------------------------------------------------------------------------------------------------------------------------------------------------------------------------------------------------------------------------------------------------------------------------------------------------------------------------------------------------------------------------------------|---------------|--------------|--------------|
| 13 | RPS4Y1 | ribosomal protein S4, Y-linked 1 | 10.165 | 8.55E-07 | 6.0682 | 0.00031531 | High_Male - High_Female;<br>Low_Female - High_Female;<br>Low_Male - High_Female;<br>Medium_Female - High_Female;<br>Medium_Male - High_Female;<br>High_Male - Low_Female;<br>Low_Male - High_Male;<br>High_Male - Medium_Female;<br>Medium_Male - High_Male;<br>Low_Male - Low_Female;<br>Low_Female - Medium_Female;<br>Medium_Male - Low_Female;<br>Low_Male - Medium_Female;<br>Low_Male - Medium_Male;<br>Medium_Male - Medium_Female | A_23_P259314  | NM_001008    | NM_001008    |
| 14 | 1      | LOC10050912                      | 10.026 | 1.01E-06 | 5.9964 | 0.00031531 | High_Male - High_Female;<br>Low_Female - High_Female;<br>Low_Male - High_Female;<br>Medium_Female - High_Female;<br>Medium_Male - High_Female;<br>High_Male - Low_Female;<br>Low_Male - High_Male;<br>High_Male - Medium_Female;<br>Medium_Male - High_Male;<br>Low_Male - Low_Female;<br>Low_Female - Medium_Female;<br>Medium_Male - Low_Female;<br>Low_Male - Medium_Female;<br>Medium_Male - Low_Male;<br>Medium_Male - Medium_Female | A_21_P0013996 | XM_003120334 | XM_003120334 |

|    |         |                                                                  |        |          |        |            |                                                                                                                                                                                                                                                                                                                                                                                                                                           |               |              |              |
|----|---------|------------------------------------------------------------------|--------|----------|--------|------------|-------------------------------------------------------------------------------------------------------------------------------------------------------------------------------------------------------------------------------------------------------------------------------------------------------------------------------------------------------------------------------------------------------------------------------------------|---------------|--------------|--------------|
| 15 | UTY     | ubiquitously transcribed tetratricopeptide repeat gene, Y-linked | 10.026 | 1.01E-06 | 5.9963 | 0.00031531 | High_Male - High_Female;<br>Low_Female - High_Female;<br>Low_Male - High_Female;<br>Medium_Female - High_Female;<br>Medium_Male - High_Female;<br>Low_Female - High_Male;<br>Low_Male - High_Male;<br>Medium_Female - High_Male;<br>Medium_Male - High_Male;<br>Low_Male - Low_Female;<br>Low_Female - Medium_Female;<br>Medium_Male - Low_Female;<br>Low_Male - Medium_Female;<br>Medium_Male - Low_Male;<br>Medium_Male - Medium_Female | A_33_P3228977 |              | BC012581     |
| 16 | PP12719 | uncharacterized LOC100653022                                     | 10.009 | 1.03E-06 | 5.9879 | 0.00031531 | High_Female - High_Male;<br>High_Female - Low_Female;<br>High_Female - Low_Male;<br>High_Female - Medium_Female;<br>High_Female - Medium_Male;<br>High_Male - Low_Female;<br>High_Male - Low_Male;<br>High_Male - Medium_Female;<br>Medium_Male - High_Male;<br>Low_Female - Low_Male;<br>Medium_Female - Low_Female;<br>Medium_Male - Low_Female;<br>Medium_Female - Low_Male;<br>Medium_Male - Low_Male;<br>Medium_Male - Medium_Female | A_21_P0014028 | XM_003403527 | XM_003403527 |

|    |        |                                                       |        |          |        |            |                                                                                                                                                                                                                                                                                                                                                                                                                                           |               |              |              |
|----|--------|-------------------------------------------------------|--------|----------|--------|------------|-------------------------------------------------------------------------------------------------------------------------------------------------------------------------------------------------------------------------------------------------------------------------------------------------------------------------------------------------------------------------------------------------------------------------------------------|---------------|--------------|--------------|
| 17 | RPS4Y2 | ribosomal protein S4, Y-linked 2                      | 9.9114 | 1.16E-06 | 5.9371 | 0.00031531 | High_Male - High_Female;<br>Low_Female - High_Female;<br>Low_Male - High_Female;<br>Medium_Female - High_Female;<br>Medium_Male - High_Female;<br>High_Male - Low_Female;<br>Low_Male - High_Male;<br>High_Male - Medium_Female;<br>Medium_Male - High_Male;<br>Low_Male - Low_Female;<br>Low_Female - Medium_Female;<br>Medium_Male - Low_Female;<br>Low_Male - Medium_Female;<br>Low_Male - Medium_Male;<br>Medium_Male - Medium_Female | A_23_P324384  | NM_001039567 | NM_001039567 |
| 18 | XIST   | X (inactive)-specific transcript (non-protein coding) | 9.8979 | 1.17E-06 | 5.9301 | 0.00031531 | High_Female - High_Male;<br>High_Female - Low_Female;<br>High_Female - Low_Male;<br>High_Female - Medium_Female;<br>High_Female - Medium_Male;<br>Low_Female - High_Male;<br>High_Male - Low_Male;<br>Medium_Female - High_Male;<br>High_Male - Medium_Male;<br>Low_Female - Low_Male;<br>Medium_Female - Low_Female;<br>Low_Female - Medium_Male;<br>Medium_Female - Low_Male;<br>Medium_Male - Low_Male;<br>Medium_Female - Medium_Male | A_33_P3341686 | NR_001564    | NR_001564    |

|    |             |                            |        |          |        |            |                                                                                                                                                                                                                                                                                                                                                                                                                                           |                     |           |           |
|----|-------------|----------------------------|--------|----------|--------|------------|-------------------------------------------------------------------------------------------------------------------------------------------------------------------------------------------------------------------------------------------------------------------------------------------------------------------------------------------------------------------------------------------------------------------------------------------|---------------------|-----------|-----------|
| 19 | XLOC_008015 |                            | 9.8812 | 1.20E-06 | 5.9214 | 0.00031531 | High_Female - High_Male;<br>High_Female - Low_Female;<br>High_Female - Low_Male;<br>High_Female - Medium_Female;<br>High_Female - Medium_Male;<br>Low_Female - High_Male;<br>High_Male - Low_Male;<br>Medium_Female - High_Male;<br>High_Male - Medium_Male;<br>Low_Female - Low_Male;<br>Medium_Female - Low_Female;<br>Low_Female - Medium_Male;<br>Medium_Female - Low_Male;<br>Medium_Male - Low_Male;<br>Medium_Female - Medium_Male | linc TCONS_00017433 |           |           |
| 20 | NCRNA00185  | non-protein coding RNA 185 | 9.8036 | 1.32E-06 | 5.8809 | 0.00031889 | High_Male - High_Female;<br>Low_Female - High_Female;<br>Low_Male - High_Female;<br>Medium_Female - High_Female;<br>Medium_Male - High_Female;<br>High_Male - Low_Female;<br>Low_Male - High_Male;<br>High_Male - Medium_Female;<br>Medium_Male - High_Male;<br>Low_Male - Low_Female;<br>Medium_Female - Low_Female;<br>Medium_Male - Low_Female;<br>Low_Male - Medium_Female;<br>Medium_Male - Low_Male;<br>Medium_Male - Medium_Female | A_23_P73848         | NR_001544 | NR_001544 |

|    |       |                                                                  |        |          |        |            |                                                                                                                                                                                                                                                                                                                                                                                                                                           |               |              |              |
|----|-------|------------------------------------------------------------------|--------|----------|--------|------------|-------------------------------------------------------------------------------------------------------------------------------------------------------------------------------------------------------------------------------------------------------------------------------------------------------------------------------------------------------------------------------------------------------------------------------------------|---------------|--------------|--------------|
| 21 | UTY   | ubiquitously transcribed tetratricopeptide repeat gene, Y-linked | 9.7826 | 1.35E-06 | 5.87   | 0.00031889 | High_Male - High_Female;<br>Low_Female - High_Female;<br>Low_Male - High_Female;<br>Medium_Female - High_Female;<br>Medium_Male - High_Female;<br>High_Male - Low_Female;<br>Low_Male - High_Male;<br>High_Male - Medium_Female;<br>Medium_Male - High_Male;<br>Low_Male - Low_Female;<br>Medium_Female - Low_Female;<br>Medium_Male - Low_Female;<br>Low_Male - Medium_Female;<br>Medium_Male - Low_Male;<br>Medium_Male - Medium_Female | A_23_P329835  | NM_007125    | NM_007125    |
| 22 | DDX3Y | DEAD (Asp-Glu-Ala-Asp) box polypeptide 3, Y-linked               | 9.7498 | 1.40E-06 | 5.8528 | 0.00031889 | High_Male - High_Female;<br>Low_Female - High_Female;<br>Low_Male - High_Female;<br>Medium_Female - High_Female;<br>Medium_Male - High_Female;<br>High_Male - Low_Female;<br>Low_Male - High_Male;<br>High_Male - Medium_Female;<br>Medium_Male - High_Male;<br>Low_Male - Low_Female;<br>Low_Female - Medium_Female;<br>Medium_Male - Low_Female;<br>Low_Male - Medium_Female;<br>Low_Male - Medium_Male;<br>Medium_Male - Medium_Female | A_33_P3224331 | NM_001122665 | NM_001122665 |

|    |        |                                                       |        |          |        |            |                                                                                                                                                                                                                                                                                                                                                                                                                                           |                |           |           |
|----|--------|-------------------------------------------------------|--------|----------|--------|------------|-------------------------------------------------------------------------------------------------------------------------------------------------------------------------------------------------------------------------------------------------------------------------------------------------------------------------------------------------------------------------------------------------------------------------------------------|----------------|-----------|-----------|
| 23 | MALAT1 |                                                       | 9.4769 | 1.95E-06 | 5.7091 | 0.00042469 | High_Male - High_Female;<br>Low_Female - High_Female;<br>Low_Male - High_Female;<br>Medium_Female - High_Female;<br>Medium_Male - High_Female;<br>Low_Female - High_Male;<br>Low_Male - High_Male;<br>Medium_Female - High_Male;<br>Medium_Male - High_Male;<br>Low_Male - Low_Female;<br>Low_Female - Medium_Female;<br>Low_Female - Medium_Male;<br>Low_Male - Medium_Female;<br>Low_Male - Medium_Male;<br>Medium_Male - Medium_Female | A_19_P00805006 | NR_002819 | NR_002819 |
| 24 | EIF1AY | eukaryotic translation initiation factor 1A, Y-linked | 9.3622 | 2.25E-06 | 5.6481 | 0.00046834 | High_Male - High_Female;<br>Low_Female - High_Female;<br>Low_Male - High_Female;<br>Medium_Female - High_Female;<br>Medium_Male - High_Female;<br>High_Male - Low_Female;<br>Low_Male - High_Male;<br>High_Male - Medium_Female;<br>Medium_Male - High_Male;<br>Low_Male - Low_Female;<br>Low_Female - Medium_Female;<br>Medium_Male - Low_Female;<br>Low_Male - Medium_Female;<br>Medium_Male - Low_Male;<br>Medium_Male - Medium_Female | A_23_P148629   | NM_004681 | NM_004681 |



|    |             |  |        |          |        |            |                                                                                                                                                                                                                                                                                                                                                                                                                                           |                                                                                   |           |           |
|----|-------------|--|--------|----------|--------|------------|-------------------------------------------------------------------------------------------------------------------------------------------------------------------------------------------------------------------------------------------------------------------------------------------------------------------------------------------------------------------------------------------------------------------------------------------|-----------------------------------------------------------------------------------|-----------|-----------|
| 25 | MALAT1      |  | 9.2065 | 2.72E-06 | 5.5649 | 0.00054456 | High_Male - High_Female;<br>Low_Female - High_Female;<br>Low_Male - High_Female;<br>Medium_Female - High_Female;<br>Medium_Male - High_Female;<br>Low_Female - High_Male;<br>Low_Male - High_Male;<br>Medium_Female - High_Male;<br>Medium_Male - High_Male;<br>Low_Male - Low_Female;<br>Low_Female - Medium_Female;<br>Low_Female - Medium_Male;<br>Low_Male - Medium_Female;<br>Low_Male - Medium_Male;<br>Medium_Male - Medium_Female | A_19_P00809614                                                                    | NR_002819 | NR_002819 |
| 26 | XLOC_008276 |  | 8.9388 | 3.80E-06 | 5.4204 | 0.00073025 | High_Male - High_Female;<br>Low_Female - High_Female;<br>Low_Male - High_Female;<br>Medium_Female - High_Female;<br>Medium_Male - High_Female;<br>Low_Female - High_Male;<br>Low_Male - High_Male;<br>High_Male - Medium_Female;<br>Medium_Male - High_Male;<br>Low_Male - Low_Female;<br>Low_Female - Medium_Female;<br>Medium_Male - Low_Female;<br>Low_Male - Medium_Female;<br>Low_Male - Medium_Male;<br>Medium_Male - Medium_Female | ens ENST00000425031 ens E<br>NST00000435867 tc THC2649<br>420 linc TCONS_00017607 |           |           |

|    |                  |                                      |        |          |        |            |                                                                                                                                                                                                                                                                                                                                                                                                                                           |               |           |           |
|----|------------------|--------------------------------------|--------|----------|--------|------------|-------------------------------------------------------------------------------------------------------------------------------------------------------------------------------------------------------------------------------------------------------------------------------------------------------------------------------------------------------------------------------------------------------------------------------------------|---------------|-----------|-----------|
| 27 | LOC10050693<br>0 | uncharacterized LOC100506930         | 8.7521 | 4.80E-06 | 5.3187 | 0.00088887 | High_Male - High_Female;<br>Low_Female - High_Female;<br>Low_Male - High_Female;<br>High_Female - Medium_Female;<br>Medium_Male - High_Female;<br>Low_Female - High_Male;<br>Low_Male - High_Male;<br>High_Male - Medium_Female;<br>Medium_Male - High_Male;<br>Low_Male - Low_Female;<br>Low_Female - Medium_Female;<br>Low_Female - Medium_Male;<br>Low_Male - Medium_Female;<br>Low_Male - Medium_Male;<br>Medium_Male - Medium_Female | A_21_P0011696 | NR_038279 | NR_038279 |
| 28 | PRKY             | protein kinase, Y-linked, pseudogene | 8.4677 | 6.89E-06 | 5.1619 | 0.0012296  | High_Male - High_Female;<br>Low_Female - High_Female;<br>Low_Male - High_Female;<br>Medium_Female - High_Female;<br>Medium_Male - High_Female;<br>High_Male - Low_Female;<br>Low_Male - High_Male;<br>High_Male - Medium_Female;<br>Medium_Male - High_Male;<br>Low_Male - Low_Female;<br>Medium_Female - Low_Female;<br>Medium_Male - Low_Female;<br>Low_Male - Medium_Female;<br>Medium_Male - Low_Male;<br>Medium_Male - Medium_Female | A_23_P137248  | NR_028062 | NR_028062 |

|    |             |                             |        |          |        |           |                                                                                                                                                                                                                                                                                                                                                                                                                                           |                                                                                 |           |           |
|----|-------------|-----------------------------|--------|----------|--------|-----------|-------------------------------------------------------------------------------------------------------------------------------------------------------------------------------------------------------------------------------------------------------------------------------------------------------------------------------------------------------------------------------------------------------------------------------------------|---------------------------------------------------------------------------------|-----------|-----------|
| 29 | TXLNG2P     | taxilin gamma 2, pseudogene | 8.1242 | 1.07E-05 | 4.9699 | 0.0018473 | High_Male - High_Female;<br>Low_Female - High_Female;<br>Low_Male - High_Female;<br>Medium_Female - High_Female;<br>Medium_Male - High_Female;<br>Low_Female - High_Male;<br>Low_Male - High_Male;<br>High_Male - Medium_Female;<br>Medium_Male - High_Male;<br>Low_Male - Low_Female;<br>Low_Female - Medium_Female;<br>Medium_Male - Low_Female;<br>Low_Male - Medium_Female;<br>Medium_Male - Low_Male;<br>Medium_Male - Medium_Female | A_23_P96658                                                                     | NR_045128 | NR_045128 |
| 30 | XLOC_008276 |                             | 8.0445 | 1.19E-05 | 4.9249 | 0.0019807 | High_Male - High_Female;<br>Low_Female - High_Female;<br>Low_Male - High_Female;<br>Medium_Female - High_Female;<br>Medium_Male - High_Female;<br>Low_Female - High_Male;<br>Low_Male - High_Male;<br>High_Male - Medium_Female;<br>Medium_Male - High_Male;<br>Low_Male - Low_Female;<br>Low_Female - Medium_Female;<br>Medium_Male - Low_Female;<br>Low_Male - Medium_Female;<br>Low_Male - Medium_Male;<br>Medium_Male - Medium_Female | ens ENST00000444263 ens ENST00000420327 linc TCONS_00017606 linc TCONS_00016999 |           |           |

|    |             |             |        |          |        |           |                                                                                                                                                                                                                                                                                                                                                                                                                                           |                                                               |           |           |
|----|-------------|-------------|--------|----------|--------|-----------|-------------------------------------------------------------------------------------------------------------------------------------------------------------------------------------------------------------------------------------------------------------------------------------------------------------------------------------------------------------------------------------------------------------------------------------------|---------------------------------------------------------------|-----------|-----------|
| 31 | 3           | LOC10050600 | 8.0045 | 1.25E-05 | 4.9023 | 0.0020194 | High_Male - High_Female;<br>Low_Female - High_Female;<br>Low_Male - High_Female;<br>Medium_Female - High_Female;<br>Medium_Male - High_Female;<br>High_Male - Low_Female;<br>Low_Male - High_Male;<br>High_Male - Medium_Female;<br>Medium_Male - High_Male;<br>Low_Male - Low_Female;<br>Low_Female - Medium_Female;<br>Medium_Male - Low_Female;<br>Low_Male - Medium_Female;<br>Low_Male - Medium_Male;<br>Medium_Male - Medium_Female | A_21_P0014436                                                 | XR_109785 | XR_109785 |
| 32 | XLOC_008276 |             | 7.9503 | 1.34E-05 | 4.8716 | 0.0020998 | High_Male - High_Female;<br>Low_Female - High_Female;<br>Low_Male - High_Female;<br>Medium_Female - High_Female;<br>Medium_Male - High_Female;<br>High_Male - Low_Female;<br>Low_Male - High_Male;<br>High_Male - Medium_Female;<br>Medium_Male - High_Male;<br>Low_Male - Low_Female;<br>Low_Female - Medium_Female;<br>Medium_Male - Low_Female;<br>Low_Male - Medium_Female;<br>Medium_Male - Low_Male;<br>Medium_Male - Medium_Female | ens ENST00000425031 tc TH<br>C2649420 linc TCONS_00017<br>607 |           |           |

|    |             |           |        |          |        |           |                                                                                                                                                                                                                                                                                                                                                                                                                                           |                     |           |           |
|----|-------------|-----------|--------|----------|--------|-----------|-------------------------------------------------------------------------------------------------------------------------------------------------------------------------------------------------------------------------------------------------------------------------------------------------------------------------------------------------------------------------------------------------------------------------------------------|---------------------|-----------|-----------|
| 33 | XLOC_008185 |           | 7.8133 | 1.61E-05 | 4.7935 | 0.002437  | High_Female - High_Male;<br>High_Female - Low_Female;<br>High_Female - Low_Male;<br>High_Female - Medium_Female;<br>High_Female - Medium_Male;<br>Low_Female - High_Male;<br>High_Male - Low_Male;<br>Medium_Female - High_Male;<br>High_Male - Medium_Male;<br>Low_Female - Low_Male;<br>Medium_Female - Low_Female;<br>Low_Female - Medium_Male;<br>Medium_Female - Low_Male;<br>Medium_Male - Low_Male;<br>Medium_Female - Medium_Male | linc TCONS_00017074 |           |           |
| 34 | SFN         | stratifin | 7.6947 | 1.88E-05 | 4.7255 | 0.0027663 | High_Male - High_Female;<br>Low_Female - High_Female;<br>Low_Male - High_Female;<br>High_Female - Medium_Female;<br>High_Female - Medium_Male;<br>Low_Female - High_Male;<br>Low_Male - High_Male;<br>High_Male - Medium_Female;<br>High_Male - Medium_Male;<br>Low_Male - Low_Female;<br>Low_Female - Medium_Female;<br>Low_Female - Medium_Male;<br>Low_Male - Medium_Female;<br>Low_Male - Medium_Male;<br>Medium_Female - Medium_Male | A_33_P3389286       | NM_006142 | NM_006142 |

|    |       |                                                              |        |          |        |           |                                                                                                                                                                                                                                                                                                                                                                                                                                           |               |           |           |
|----|-------|--------------------------------------------------------------|--------|----------|--------|-----------|-------------------------------------------------------------------------------------------------------------------------------------------------------------------------------------------------------------------------------------------------------------------------------------------------------------------------------------------------------------------------------------------------------------------------------------------|---------------|-----------|-----------|
| 35 | RGS1  | regulator of G-protein signaling 1                           | 7.6575 | 1.98E-05 | 4.7041 | 0.0028229 | High_Male - High_Female;<br>Low_Female - High_Female;<br>Low_Male - High_Female;<br>Medium_Female - High_Female;<br>Medium_Male - High_Female;<br>High_Male - Low_Female;<br>Low_Male - High_Male;<br>High_Male - Medium_Female;<br>High_Male - Medium_Male;<br>Low_Male - Low_Female;<br>Low_Female - Medium_Female;<br>Medium_Male - Low_Female;<br>Low_Male - Medium_Female;<br>Low_Male - Medium_Male;<br>Medium_Male - Medium_Female | A_23_P97141   | NM_002922 | NM_002922 |
| 36 | TTY15 | testis-specific transcript, Y-linked 15 (non-protein coding) | 7.3469 | 2.99E-05 | 4.524  | 0.0041262 | High_Male - High_Female;<br>Low_Female - High_Female;<br>Low_Male - High_Female;<br>Medium_Female - High_Female;<br>Medium_Male - High_Female;<br>High_Male - Low_Female;<br>Low_Male - High_Male;<br>High_Male - Medium_Female;<br>Medium_Male - High_Male;<br>Low_Male - Low_Female;<br>Low_Female - Medium_Female;<br>Medium_Male - Low_Female;<br>Low_Male - Medium_Female;<br>Low_Male - Medium_Male;<br>Medium_Male - Medium_Female | A_21_P0006594 | NR_001545 | NR_001545 |

|    |      |                         |        |          |        |           |                                                                                                                                                                                                                                                                                                                                                                                                                                           |              |           |           |
|----|------|-------------------------|--------|----------|--------|-----------|-------------------------------------------------------------------------------------------------------------------------------------------------------------------------------------------------------------------------------------------------------------------------------------------------------------------------------------------------------------------------------------------------------------------------------------------|--------------|-----------|-----------|
| 37 | IL8  | interleukin 8           | 7.3317 | 3.05E-05 | 4.5151 | 0.0041262 | High_Male - High_Female;<br>Low_Female - High_Female;<br>Low_Male - High_Female;<br>High_Female - Medium_Female;<br>Medium_Male - High_Female;<br>Low_Female - High_Male;<br>Low_Male - High_Male;<br>High_Male - Medium_Female;<br>Medium_Male - High_Male;<br>Low_Male - Low_Female;<br>Low_Female - Medium_Female;<br>Low_Female - Medium_Male;<br>Low_Male - Medium_Female;<br>Low_Male - Medium_Male;<br>Medium_Male - Medium_Female | A_32_P87013  | NM_000584 | NM_000584 |
| 38 | EGR3 | early growth response 3 | 7.2622 | 3.35E-05 | 4.4744 | 0.0044122 | High_Male - High_Female;<br>Low_Female - High_Female;<br>Low_Male - High_Female;<br>Medium_Female - High_Female;<br>Medium_Male - High_Female;<br>High_Male - Low_Female;<br>Low_Male - High_Male;<br>High_Male - Medium_Female;<br>High_Male - Medium_Male;<br>Low_Male - Low_Female;<br>Low_Female - Medium_Female;<br>Low_Female - Medium_Male;<br>Low_Male - Medium_Female;<br>Low_Male - Medium_Male;<br>Medium_Male - Medium_Female | A_23_P216225 | NM_004430 | NM_004430 |

|    |       |                                                                                             |        |          |        |           |                                                                                                                                                                                                                                                                                                                                                                                                                                           |              |              |              |
|----|-------|---------------------------------------------------------------------------------------------|--------|----------|--------|-----------|-------------------------------------------------------------------------------------------------------------------------------------------------------------------------------------------------------------------------------------------------------------------------------------------------------------------------------------------------------------------------------------------------------------------------------------------|--------------|--------------|--------------|
| 39 | PTGS2 | prostaglandin-endoperoxide synthase 2<br>(prostaglandin G/H synthase and<br>cyclooxygenase) | 7.1725 | 3.79E-05 | 4.4217 | 0.0047569 | High_Male - High_Female;<br>Low_Female - High_Female;<br>Low_Male - High_Female;<br>Medium_Female - High_Female;<br>Medium_Male - High_Female;<br>Low_Female - High_Male;<br>Low_Male - High_Male;<br>High_Male - Medium_Female;<br>High_Male - Medium_Male;<br>Low_Male - Low_Female;<br>Low_Female - Medium_Female;<br>Low_Female - Medium_Male;<br>Low_Male - Medium_Female;<br>Low_Male - Medium_Male;<br>Medium_Male - Medium_Female | A_24_P250922 | NM_000963    | NM_000963    |
| 40 | CXCR4 | chemokine (C-X-C motif) receptor 4                                                          | 7.1687 | 3.81E-05 | 4.4195 | 0.0047569 | High_Male - High_Female;<br>Low_Female - High_Female;<br>Low_Male - High_Female;<br>Medium_Female - High_Female;<br>Medium_Male - High_Female;<br>High_Male - Low_Female;<br>Low_Male - High_Male;<br>High_Male - Medium_Female;<br>High_Male - Medium_Male;<br>Low_Male - Low_Female;<br>Low_Female - Medium_Female;<br>Medium_Male - Low_Female;<br>Low_Male - Medium_Female;<br>Low_Male - Medium_Male;<br>Medium_Male - Medium_Female | A_23_P102000 | NM_001008540 | NM_001008540 |



|    |             |               |        |          |        |           |                                                                                                                                                                                                                                                                                                                                                                                                                                           |                                                                                   |  |  |
|----|-------------|---------------|--------|----------|--------|-----------|-------------------------------------------------------------------------------------------------------------------------------------------------------------------------------------------------------------------------------------------------------------------------------------------------------------------------------------------------------------------------------------------------------------------------------------------|-----------------------------------------------------------------------------------|--|--|
| 41 | XLOC_012515 |               | 6.9761 | 4.95E-05 | 4.3056 | 0.0060331 | High_Female - High_Male;<br>High_Female - Low_Female;<br>High_Female - Low_Male;<br>High_Female - Medium_Female;<br>High_Female - Medium_Male;<br>High_Male - Low_Female;<br>High_Male - Low_Male;<br>High_Male - Medium_Female;<br>High_Male - Medium_Male;<br>Low_Female - Low_Male;<br>Medium_Female - Low_Female;<br>Medium_Male - Low_Female;<br>Medium_Female - Low_Male;<br>Medium_Male - Low_Male;<br>Medium_Female - Medium_Male | ens ENST00000508851 tc TH<br>C2707471 linc TCONS_00025<br>694 linc TCONS_00025237 |  |  |
| 42 | IL8         | interleukin 8 | 6.9492 | 5.13E-05 | 4.2895 | 0.0061107 | High_Male - High_Female;<br>Low_Female - High_Female;<br>Low_Male - High_Female;<br>Medium_Female - High_Female;<br>Medium_Male - High_Female;<br>Low_Female - High_Male;<br>Low_Male - High_Male;<br>Medium_Female - High_Male;<br>Medium_Male - High_Male;<br>Low_Male - Low_Female;<br>Low_Female - Medium_Female;<br>Low_Female - Medium_Male;<br>Low_Male - Medium_Female;<br>Low_Male - Medium_Male;<br>Medium_Female - Medium_Male | ens ENST00000401931 tc TH<br>C2544321 tc THC2508924                               |  |  |

|    |      |                               |        |          |        |           |                                                                                                                                                                                                                                                                                                                                                                                                                                           |              |           |           |
|----|------|-------------------------------|--------|----------|--------|-----------|-------------------------------------------------------------------------------------------------------------------------------------------------------------------------------------------------------------------------------------------------------------------------------------------------------------------------------------------------------------------------------------------------------------------------------------------|--------------|-----------|-----------|
| 43 | EGR2 | early growth response 2       | 6.9194 | 5.35E-05 | 4.2718 | 0.0062172 | High_Male - High_Female;<br>Low_Female - High_Female;<br>Low_Male - High_Female;<br>Medium_Female - High_Female;<br>Medium_Male - High_Female;<br>Low_Female - High_Male;<br>Low_Male - High_Male;<br>High_Male - Medium_Female;<br>High_Male - Medium_Male;<br>Low_Male - Low_Female;<br>Low_Female - Medium_Female;<br>Low_Female - Medium_Male;<br>Low_Male - Medium_Female;<br>Low_Male - Medium_Male;<br>Medium_Male - Medium_Female | A_23_P46936  | NM_000399 | NM_000399 |
| 44 | ZFY  | zinc finger protein, Y-linked | 6.5715 | 8.65E-05 | 4.0628 | 0.009831  | High_Male - High_Female;<br>Low_Female - High_Female;<br>Low_Male - High_Female;<br>Medium_Female - High_Female;<br>Medium_Male - High_Female;<br>High_Male - Low_Female;<br>Low_Male - High_Male;<br>High_Male - Medium_Female;<br>Medium_Male - High_Male;<br>Low_Male - Low_Female;<br>Low_Female - Medium_Female;<br>Medium_Male - Low_Female;<br>Low_Male - Medium_Female;<br>Medium_Male - Low_Male;<br>Medium_Male - Medium_Female | A_24_P942743 | NM_003411 | NM_003411 |

|    |           |                                                              |        |          |        |           |                                                                                                                                                                                                                                                                                                                                                                                                                                           |               |           |           |
|----|-----------|--------------------------------------------------------------|--------|----------|--------|-----------|-------------------------------------------------------------------------------------------------------------------------------------------------------------------------------------------------------------------------------------------------------------------------------------------------------------------------------------------------------------------------------------------------------------------------------------------|---------------|-----------|-----------|
| 45 | TTY15     | testis-specific transcript, Y-linked 15 (non-protein coding) | 6.5332 | 9.13E-05 | 4.0396 | 0.0099916 | High_Male - High_Female;<br>Low_Female - High_Female;<br>Low_Male - High_Female;<br>Medium_Female - High_Female;<br>Medium_Male - High_Female;<br>High_Male - Low_Female;<br>Low_Male - High_Male;<br>High_Male - Medium_Female;<br>Medium_Male - High_Male;<br>Low_Male - Low_Female;<br>Low_Female - Medium_Female;<br>Medium_Male - Low_Female;<br>Low_Male - Medium_Female;<br>Low_Male - Medium_Male;<br>Medium_Male - Medium_Female | A_24_P348861  | NR_001545 | NR_001545 |
| 46 | LOC643072 | uncharacterized LOC643072                                    | 6.5281 | 9.19E-05 | 4.0365 | 0.0099916 | High_Female - High_Male;<br>High_Female - Low_Female;<br>High_Female - Low_Male;<br>High_Female - Medium_Female;<br>High_Female - Medium_Male;<br>High_Male - Low_Female;<br>High_Male - Low_Male;<br>High_Male - Medium_Female;<br>High_Male - Medium_Male;<br>Low_Female - Low_Male;<br>Low_Female - Medium_Female;<br>Low_Female - Medium_Male;<br>Medium_Female - Low_Male;<br>Medium_Male - Low_Male;<br>Medium_Female - Medium_Male | A_21_P0014102 | XR_108434 | XR_108434 |

|    |       |                                                    |        |          |        |          |                                                                                                                                                                                                                                                                                                                                                                                                                                           |              |           |           |
|----|-------|----------------------------------------------------|--------|----------|--------|----------|-------------------------------------------------------------------------------------------------------------------------------------------------------------------------------------------------------------------------------------------------------------------------------------------------------------------------------------------------------------------------------------------------------------------------------------------|--------------|-----------|-----------|
| 47 | DDX3Y | DEAD (Asp-Glu-Ala-Asp) box polypeptide 3, Y-linked | 6.4925 | 9.66E-05 | 4.0148 | 0.010049 | High_Male - High_Female;<br>Low_Female - High_Female;<br>Low_Male - High_Female;<br>Medium_Female - High_Female;<br>Medium_Male - High_Female;<br>High_Male - Low_Female;<br>Low_Male - High_Male;<br>High_Male - Medium_Female;<br>Medium_Male - High_Male;<br>Low_Male - Low_Female;<br>Low_Female - Medium_Female;<br>Medium_Male - Low_Female;<br>Low_Male - Medium_Female;<br>Medium_Male - Low_Male;<br>Medium_Male - Medium_Female | A_24_P130936 | NM_004660 | NM_004660 |
| 48 | FOSB  | FBJ murine osteosarcoma viral oncogene homolog B   | 6.4808 | 9.82E-05 | 4.0078 | 0.010049 | High_Male - High_Female;<br>Low_Female - High_Female;<br>Low_Male - High_Female;<br>Medium_Female - High_Female;<br>Medium_Male - High_Female;<br>High_Male - Low_Female;<br>Low_Male - High_Male;<br>High_Male - Medium_Female;<br>High_Male - Medium_Male;<br>Low_Male - Low_Female;<br>Low_Female - Medium_Female;<br>Low_Female - Medium_Male;<br>Low_Male - Medium_Female;<br>Low_Male - Medium_Male;<br>Medium_Male - Medium_Female | A_23_P429998 | NM_006732 | NM_006732 |

|    |         |                                   |        |            |        |          |                                                                                                                                                                                                                                                                                                                                                                                                                                           |               |           |           |
|----|---------|-----------------------------------|--------|------------|--------|----------|-------------------------------------------------------------------------------------------------------------------------------------------------------------------------------------------------------------------------------------------------------------------------------------------------------------------------------------------------------------------------------------------------------------------------------------------|---------------|-----------|-----------|
| 49 | AREG    | amphiregulin                      | 6.4789 | 9.85E-05   | 4.0066 | 0.010049 | High_Male - High_Female;<br>Low_Female - High_Female;<br>Low_Male - High_Female;<br>High_Female - Medium_Female;<br>Medium_Male - High_Female;<br>High_Male - Low_Female;<br>Low_Male - High_Male;<br>High_Male - Medium_Female;<br>High_Male - Medium_Male;<br>Low_Male - Low_Female;<br>Low_Female - Medium_Female;<br>Medium_Male - Low_Female;<br>Low_Male - Medium_Female;<br>Low_Male - Medium_Male;<br>Medium_Male - Medium_Female | A_23_P259071  | NM_001657 | NM_001657 |
| 50 | SNAR-B2 | small ILF3/NF90-associated RNA B2 | 6.4542 | 0.00010197 | 3.9915 | 0.010195 | High_Female - High_Male;<br>High_Female - Low_Female;<br>High_Female - Low_Male;<br>High_Female - Medium_Female;<br>High_Female - Medium_Male;<br>Low_Female - High_Male;<br>High_Male - Low_Male;<br>Medium_Female - High_Male;<br>Medium_Male - High_Male;<br>Low_Female - Low_Male;<br>Medium_Female - Low_Female;<br>Medium_Male - Low_Female;<br>Medium_Female - Low_Male;<br>Medium_Male - Low_Male;<br>Medium_Female - Medium_Male | A_21_P0000507 | NR_024230 | NR_024230 |

|    |      |                                                                  |        |            |        |          |                                                                                                                                                                                                                                                                                                                                                                                                                                           |              |           |           |
|----|------|------------------------------------------------------------------|--------|------------|--------|----------|-------------------------------------------------------------------------------------------------------------------------------------------------------------------------------------------------------------------------------------------------------------------------------------------------------------------------------------------------------------------------------------------------------------------------------------------|--------------|-----------|-----------|
| 51 | EGR1 | early growth response 1                                          | 6.3979 | 0.00011035 | 3.9572 | 0.010817 | High_Male - High_Female;<br>Low_Female - High_Female;<br>Low_Male - High_Female;<br>Medium_Female - High_Female;<br>Medium_Male - High_Female;<br>High_Male - Low_Female;<br>Low_Male - High_Male;<br>High_Male - Medium_Female;<br>High_Male - Medium_Male;<br>Low_Male - Low_Female;<br>Medium_Female - Low_Female;<br>Low_Female - Medium_Male;<br>Low_Male - Medium_Female;<br>Low_Male - Medium_Male;<br>Medium_Female - Medium_Male | A_23_P214080 | NM_001964 | NM_001964 |
| 52 | UTY  | ubiquitously transcribed tetratricopeptide repeat gene, Y-linked | 6.2118 | 0.00014351 | 3.8431 | 0.013796 | High_Male - High_Female;<br>Low_Female - High_Female;<br>Low_Male - High_Female;<br>Medium_Female - High_Female;<br>Medium_Male - High_Female;<br>Low_Female - High_Male;<br>Low_Male - High_Male;<br>Medium_Female - High_Male;<br>Medium_Male - High_Male;<br>Low_Male - Low_Female;<br>Low_Female - Medium_Female;<br>Medium_Male - Low_Female;<br>Low_Male - Medium_Female;<br>Low_Male - Medium_Male;<br>Medium_Male - Medium_Female | A_23_P160004 | NM_182660 | NM_182660 |

|    |        |                                       |        |            |        |          |                                                                                                                                                                                                                                                                                                                                                                                                                                           |               |              |              |
|----|--------|---------------------------------------|--------|------------|--------|----------|-------------------------------------------------------------------------------------------------------------------------------------------------------------------------------------------------------------------------------------------------------------------------------------------------------------------------------------------------------------------------------------------------------------------------------------------|---------------|--------------|--------------|
| 53 | ADORA3 | adenosine A3 receptor                 | 6.1923 | 0.00014755 | 3.8311 | 0.013917 | High_Male - High_Female;<br>High_Female - Low_Female;<br>Low_Male - High_Female;<br>Medium_Female - High_Female;<br>Medium_Male - High_Female;<br>High_Male - Low_Female;<br>High_Male - Low_Male;<br>High_Male - Medium_Female;<br>High_Male - Medium_Male;<br>Low_Male - Low_Female;<br>Medium_Female - Low_Female;<br>Medium_Male - Low_Female;<br>Medium_Female - Low_Male;<br>Medium_Male - Low_Male;<br>Medium_Male - Medium_Female | A_23_P137931  | NM_000677    | NM_000677    |
| 54 | CCL3L3 | chemokine (C-C motif) ligand 3-like 3 | 6.157  | 0.00015513 | 3.8093 | 0.014327 | High_Male - High_Female;<br>Low_Female - High_Female;<br>Low_Male - High_Female;<br>Medium_Female - High_Female;<br>Medium_Male - High_Female;<br>Low_Female - High_Male;<br>Low_Male - High_Male;<br>High_Male - Medium_Female;<br>High_Male - Medium_Male;<br>Low_Female - Low_Male;<br>Low_Female - Medium_Female;<br>Low_Female - Medium_Male;<br>Low_Male - Medium_Female;<br>Low_Male - Medium_Male;<br>Medium_Female - Medium_Male | A_33_P3296181 | NM_001001437 | NM_001001437 |

|    |                    |               |        |            |        |          |                                                                                                                                                                                                                                                                                                                                                                                                                                           |                                                                              |           |           |
|----|--------------------|---------------|--------|------------|--------|----------|-------------------------------------------------------------------------------------------------------------------------------------------------------------------------------------------------------------------------------------------------------------------------------------------------------------------------------------------------------------------------------------------------------------------------------------------|------------------------------------------------------------------------------|-----------|-----------|
| 55 | XLOC_I2_0158<br>92 |               | 6.1458 | 0.00015762 | 3.8024 | 0.014327 | High_Male - High_Female;<br>Low_Female - High_Female;<br>Low_Male - High_Female;<br>Medium_Female - High_Female;<br>Medium_Male - High_Female;<br>High_Male - Low_Female;<br>Low_Male - High_Male;<br>High_Male - Medium_Female;<br>Medium_Male - High_Male;<br>Low_Male - Low_Female;<br>Low_Female - Medium_Female;<br>Medium_Male - Low_Female;<br>Low_Male - Medium_Female;<br>Low_Male - Medium_Male;<br>Medium_Male - Medium_Female | ens ENST00000430079 ens ENST00000460561 tc THC2783530 linc TCONS_I2_00030900 |           |           |
| 56 | GOS2               | G0/G1switch 2 | 5.7336 | 0.0002849  | 3.5453 | 0.025432 | High_Male - High_Female;<br>Low_Female - High_Female;<br>Low_Male - High_Female;<br>Medium_Female - High_Female;<br>Medium_Male - High_Female;<br>Low_Female - High_Male;<br>Low_Male - High_Male;<br>High_Male - Medium_Female;<br>Medium_Male - High_Male;<br>Low_Male - Low_Female;<br>Low_Female - Medium_Female;<br>Low_Female - Medium_Male;<br>Low_Male - Medium_Female;<br>Low_Male - Medium_Male;<br>Medium_Male - Medium_Female | A_23_P74609                                                                  | NM_015714 | NM_015714 |



|    |        |                                                   |        |            |        |          |                                                                                                                                                                                                                                                                                                                                                                                                                                           |               |           |           |
|----|--------|---------------------------------------------------|--------|------------|--------|----------|-------------------------------------------------------------------------------------------------------------------------------------------------------------------------------------------------------------------------------------------------------------------------------------------------------------------------------------------------------------------------------------------------------------------------------------------|---------------|-----------|-----------|
| 57 | PMAIP1 | phorbol-12-myristate-13-acetate-induced protein 1 | 5.5138 | 0.00039242 | 3.4063 | 0.034416 | High_Male - High_Female;<br>Low_Female - High_Female;<br>Low_Male - High_Female;<br>Medium_Female - High_Female;<br>Medium_Male - High_Female;<br>High_Male - Low_Female;<br>High_Male - Low_Male;<br>High_Male - Medium_Female;<br>High_Male - Medium_Male;<br>Low_Male - Low_Female;<br>Low_Female - Medium_Female;<br>Low_Female - Medium_Male;<br>Low_Male - Medium_Female;<br>Low_Male - Medium_Male;<br>Medium_Male - Medium_Female | A_33_P3619171 | NM_021127 | NM_021127 |
| 58 | FGFR2  | fibroblast growth factor receptor 2               | 5.487  | 0.00040819 | 3.3891 | 0.035182 | High_Male - High_Female;<br>Low_Female - High_Female;<br>Low_Male - High_Female;<br>Medium_Female - High_Female;<br>Medium_Male - High_Female;<br>High_Male - Low_Female;<br>High_Male - Low_Male;<br>High_Male - Medium_Female;<br>High_Male - Medium_Male;<br>Low_Male - Low_Female;<br>Medium_Female - Low_Female;<br>Medium_Male - Low_Female;<br>Low_Male - Medium_Female;<br>Medium_Male - Low_Male;<br>Medium_Male - Medium_Female | A_23_P202334  | NM_022970 | NM_022970 |

|    |         |                                                |        |            |        |          |                                                                                                                                                                                                                                                                                                                                                                                                                                           |              |           |           |
|----|---------|------------------------------------------------|--------|------------|--------|----------|-------------------------------------------------------------------------------------------------------------------------------------------------------------------------------------------------------------------------------------------------------------------------------------------------------------------------------------------------------------------------------------------------------------------------------------------|--------------|-----------|-----------|
| 59 | FOS     | FBJ murine osteosarcoma viral oncogene homolog | 5.4662 | 0.00042083 | 3.3759 | 0.035656 | High_Male - High_Female;<br>Low_Female - High_Female;<br>Low_Male - High_Female;<br>Medium_Female - High_Female;<br>Medium_Male - High_Female;<br>Low_Female - High_Male;<br>Low_Male - High_Male;<br>Medium_Female - High_Male;<br>Medium_Male - High_Male;<br>Low_Male - Low_Female;<br>Low_Female - Medium_Female;<br>Low_Female - Medium_Male;<br>Low_Male - Medium_Female;<br>Low_Male - Medium_Male;<br>Medium_Female - Medium_Male | A_23_P106194 | NM_005252 | NM_005252 |
| 60 | PHACTR1 | phosphatase and actin regulator 1              | 5.4522 | 0.00042955 | 3.367  | 0.035789 | High_Male - High_Female;<br>Low_Female - High_Female;<br>Low_Male - High_Female;<br>Medium_Female - High_Female;<br>Medium_Male - High_Female;<br>Low_Female - High_Male;<br>Low_Male - High_Male;<br>High_Male - Medium_Female;<br>Medium_Male - High_Male;<br>Low_Male - Low_Female;<br>Low_Female - Medium_Female;<br>Low_Female - Medium_Male;<br>Low_Male - Medium_Female;<br>Low_Male - Medium_Male;<br>Medium_Male - Medium_Female | A_24_P943566 |           | AB051520  |

|    |       |                                                  |        |            |        |          |                                                                                                                                                                                                                                                                                                                                                                                                                                           |             |           |           |
|----|-------|--------------------------------------------------|--------|------------|--------|----------|-------------------------------------------------------------------------------------------------------------------------------------------------------------------------------------------------------------------------------------------------------------------------------------------------------------------------------------------------------------------------------------------------------------------------------------------|-------------|-----------|-----------|
| 61 | DUSP2 | dual specificity phosphatase 2                   | 5.328  | 0.00051573 | 3.2876 | 0.041844 | High_Male - High_Female;<br>Low_Female - High_Female;<br>Low_Male - High_Female;<br>Medium_Female - High_Female;<br>Medium_Male - High_Female;<br>High_Male - Low_Female;<br>Low_Male - High_Male;<br>High_Male - Medium_Female;<br>High_Male - Medium_Male;<br>Low_Male - Low_Female;<br>Low_Female - Medium_Female;<br>Medium_Male - Low_Female;<br>Low_Male - Medium_Female;<br>Low_Male - Medium_Male;<br>Medium_Male - Medium_Female | A_24_P37409 | NM_004418 | NM_004418 |
| 62 | P2RY2 | purinergic receptor P2Y, G-protein coupled,<br>2 | 5.3174 | 0.00052391 | 3.2807 | 0.041844 | High_Male - High_Female;<br>Low_Female - High_Female;<br>Low_Male - High_Female;<br>Medium_Female - High_Female;<br>Medium_Male - High_Female;<br>High_Male - Low_Female;<br>High_Male - Low_Male;<br>High_Male - Medium_Female;<br>Medium_Male - High_Male;<br>Low_Male - Low_Female;<br>Medium_Female - Low_Female;<br>Medium_Male - Low_Female;<br>Low_Male - Medium_Female;<br>Medium_Male - Low_Male;<br>Medium_Male - Medium_Female | A_23_P24903 | NM_176072 | NM_176072 |

|    |        |                             |        |            |        |          |                                                                                                                                                                                                                                                                                                                                                                                                                                           |               |           |           |
|----|--------|-----------------------------|--------|------------|--------|----------|-------------------------------------------------------------------------------------------------------------------------------------------------------------------------------------------------------------------------------------------------------------------------------------------------------------------------------------------------------------------------------------------------------------------------------------------|---------------|-----------|-----------|
| 63 | STK17B | serine/threonine kinase 17b | 5.313  | 0.00052733 | 3.2779 | 0.041844 | High_Female - High_Male;<br>Low_Female - High_Female;<br>Low_Male - High_Female;<br>High_Female - Medium_Female;<br>Medium_Male - High_Female;<br>Low_Female - High_Male;<br>Low_Male - High_Male;<br>Medium_Female - High_Male;<br>Medium_Male - High_Male;<br>Low_Male - Low_Female;<br>Low_Female - Medium_Female;<br>Medium_Male - Low_Female;<br>Low_Male - Medium_Female;<br>Low_Male - Medium_Male;<br>Medium_Male - Medium_Female | A_33_P3371650 |           | BC052561  |
| 64 | PRSS33 | protease, serine, 33        | 5.2609 | 0.00056954 | 3.2445 | 0.044487 | High_Male - High_Female;<br>Low_Female - High_Female;<br>Low_Male - High_Female;<br>Medium_Female - High_Female;<br>Medium_Male - High_Female;<br>High_Male - Low_Female;<br>High_Male - Low_Male;<br>High_Male - Medium_Female;<br>High_Male - Medium_Male;<br>Low_Male - Low_Female;<br>Medium_Female - Low_Female;<br>Medium_Male - Low_Female;<br>Medium_Female - Low_Male;<br>Medium_Male - Low_Male;<br>Medium_Male - Medium_Female | A_24_P327084  | NM_152891 | NM_152891 |

|    |             |  |        |            |        |          |                                                                                                                                                                                                                                                                                                                                                                                                                                           |                                  |  |          |
|----|-------------|--|--------|------------|--------|----------|-------------------------------------------------------------------------------------------------------------------------------------------------------------------------------------------------------------------------------------------------------------------------------------------------------------------------------------------------------------------------------------------------------------------------------------------|----------------------------------|--|----------|
| 65 | XLOC_000683 |  | 5.2309 | 0.0005955  | 3.2251 | 0.045317 | High_Female - High_Male;<br>High_Female - Low_Female;<br>High_Female - Low_Male;<br>High_Female - Medium_Female;<br>High_Female - Medium_Male;<br>High_Male - Low_Female;<br>High_Male - Low_Male;<br>High_Male - Medium_Female;<br>Medium_Male - High_Male;<br>Low_Female - Low_Male;<br>Medium_Female - Low_Female;<br>Medium_Male - Low_Female;<br>Medium_Female - Low_Male;<br>Medium_Male - Low_Male;<br>Medium_Male - Medium_Female | tc THC2749835 linc TCONS_0002281 |  |          |
| 66 |             |  | 5.2277 | 0.00059831 | 3.2231 | 0.045317 | High_Male - High_Female;<br>Low_Female - High_Female;<br>Low_Male - High_Female;<br>Medium_Female - High_Female;<br>High_Female - Medium_Male;<br>Low_Female - High_Male;<br>High_Male - Low_Male;<br>Medium_Female - High_Male;<br>High_Male - Medium_Male;<br>Low_Female - Low_Male;<br>Low_Female - Medium_Female;<br>Low_Female - Medium_Male;<br>Medium_Female - Low_Male;<br>Low_Male - Medium_Male;<br>Medium_Female - Medium_Male | A_33_P3415962                    |  | AK130540 |

|    |        |                                  |        |            |        |          |                                                                                                                                                                                                                                                                                                                                                                                                                                           |               |           |           |
|----|--------|----------------------------------|--------|------------|--------|----------|-------------------------------------------------------------------------------------------------------------------------------------------------------------------------------------------------------------------------------------------------------------------------------------------------------------------------------------------------------------------------------------------------------------------------------------------|---------------|-----------|-----------|
| 67 | PER1   | period homolog 1 (Drosophila)    | 5.1996 | 0.00062376 | 3.205  | 0.04654  | High_Male - High_Female;<br>Low_Female - High_Female;<br>Low_Male - High_Female;<br>High_Female - Medium_Female;<br>Medium_Male - High_Female;<br>High_Male - Low_Female;<br>Low_Male - High_Male;<br>High_Male - Medium_Female;<br>High_Male - Medium_Male;<br>Low_Male - Low_Female;<br>Low_Female - Medium_Female;<br>Medium_Male - Low_Female;<br>Low_Male - Medium_Female;<br>Low_Male - Medium_Male;<br>Medium_Male - Medium_Female | A_23_P89589   | NM_002616 | NM_002616 |
| 68 | SNAR-D | small ILF3/NF90-associated RNA D | 5.1542 | 0.00066734 | 3.1757 | 0.049059 | High_Female - High_Male;<br>High_Female - Low_Female;<br>High_Female - Low_Male;<br>High_Female - Medium_Female;<br>High_Female - Medium_Male;<br>Low_Female - High_Male;<br>High_Male - Low_Male;<br>Medium_Female - High_Male;<br>Medium_Male - High_Male;<br>Low_Female - Low_Male;<br>Medium_Female - Low_Female;<br>Medium_Male - Low_Female;<br>Medium_Female - Low_Male;<br>Medium_Male - Low_Male;<br>Medium_Female - Medium_Male | A_21_P0000508 | NR_024243 | NR_024243 |

|    |             |                                             |        |            |        |          |                                                                                                                                                                                                                                                                                                                                                                                                                                           |                                                               |           |           |
|----|-------------|---------------------------------------------|--------|------------|--------|----------|-------------------------------------------------------------------------------------------------------------------------------------------------------------------------------------------------------------------------------------------------------------------------------------------------------------------------------------------------------------------------------------------------------------------------------------------|---------------------------------------------------------------|-----------|-----------|
| 69 | 4           | LOC10050725<br>uncharacterized LOC100507254 | 5.1184 | 0.0007039  | 3.1525 | 0.050997 | High_Male - High_Female;<br>Low_Female - High_Female;<br>Low_Male - High_Female;<br>Medium_Female - High_Female;<br>Medium_Male - High_Female;<br>High_Male - Low_Female;<br>Low_Male - High_Male;<br>Medium_Female - High_Male;<br>Medium_Male - High_Male;<br>Low_Male - Low_Female;<br>Medium_Female - Low_Female;<br>Medium_Male - Low_Female;<br>Medium_Female - Low_Male;<br>Medium_Male - Low_Male;<br>Medium_Male - Medium_Female | A_21_P0004942                                                 | NR_038981 | NR_038981 |
| 70 | XLOC_012515 |                                             | 5.0702 | 0.00075638 | 3.1213 | 0.054016 | High_Female - High_Male;<br>High_Female - Low_Female;<br>High_Female - Low_Male;<br>High_Female - Medium_Female;<br>High_Female - Medium_Male;<br>High_Male - Low_Female;<br>High_Male - Low_Male;<br>High_Male - Medium_Female;<br>High_Male - Medium_Male;<br>Low_Female - Low_Male;<br>Medium_Female - Low_Female;<br>Medium_Male - Low_Female;<br>Medium_Female - Low_Male;<br>Medium_Male - Low_Male;<br>Medium_Male - Medium_Female | ens ENST00000508851 tc TH<br>C2707471 linc TCONS_00025<br>237 |           |           |

|    |           |                                                              |        |            |        |          |                                                                                                                                                                                                                                                                                                                                                                                                                                           |              |              |              |
|----|-----------|--------------------------------------------------------------|--------|------------|--------|----------|-------------------------------------------------------------------------------------------------------------------------------------------------------------------------------------------------------------------------------------------------------------------------------------------------------------------------------------------------------------------------------------------------------------------------------------------|--------------|--------------|--------------|
| 71 | SLC29A1   | solute carrier family 29 (nucleoside transporters), member 1 | 5.0422 | 0.00078869 | 3.1031 | 0.055531 | High_Male - High_Female;<br>Low_Female - High_Female;<br>Low_Male - High_Female;<br>Medium_Female - High_Female;<br>Medium_Male - High_Female;<br>High_Male - Low_Female;<br>High_Male - Low_Male;<br>High_Male - Medium_Female;<br>Medium_Male - High_Male;<br>Low_Male - Low_Female;<br>Medium_Female - Low_Female;<br>Medium_Male - Low_Female;<br>Low_Male - Medium_Female;<br>Medium_Male - Low_Male;<br>Medium_Male - Medium_Female | A_23_P133694 | NM_001078177 | NM_001078177 |
| 72 | TNFRSF12A | tumor necrosis factor receptor superfamily, member 12A       | 5.0115 | 0.00082585 | 3.0831 | 0.057339 | High_Male - High_Female;<br>High_Female - Low_Female;<br>High_Female - Low_Male;<br>High_Female - Medium_Female;<br>Medium_Male - High_Female;<br>High_Male - Low_Female;<br>High_Male - Low_Male;<br>High_Male - Medium_Female;<br>High_Male - Medium_Male;<br>Low_Male - Low_Female;<br>Medium_Female - Low_Female;<br>Medium_Male - Low_Female;<br>Medium_Female - Low_Male;<br>Medium_Male - Low_Male;<br>Medium_Male - Medium_Female | A_23_P49338  | NM_016639    | NM_016639    |



|    |                  |                              |        |            |        |          |                                                                                                                                                                                                                                                                                                                                                                                                                                           |                                             |           |           |
|----|------------------|------------------------------|--------|------------|--------|----------|-------------------------------------------------------------------------------------------------------------------------------------------------------------------------------------------------------------------------------------------------------------------------------------------------------------------------------------------------------------------------------------------------------------------------------------------|---------------------------------------------|-----------|-----------|
| 73 | XLOC_003772      |                              | 4.9875 | 0.00085606 | 3.0675 | 0.058386 | High_Male - High_Female;<br>Low_Female - High_Female;<br>Low_Male - High_Female;<br>Medium_Female - High_Female;<br>Medium_Male - High_Female;<br>Low_Female - High_Male;<br>High_Male - Low_Male;<br>Medium_Female - High_Male;<br>High_Male - Medium_Male;<br>Low_Female - Low_Male;<br>Low_Female - Medium_Female;<br>Low_Female - Medium_Male;<br>Medium_Female - Low_Male;<br>Low_Male - Medium_Male;<br>Medium_Female - Medium_Male | linc TCONS_00008317 linc TC<br>ONS_00008929 |           |           |
| 74 | 2<br>LOC10050634 | uncharacterized LOC100506342 | 4.9811 | 0.00086429 | 3.0633 | 0.058386 | High_Male - High_Female;<br>Low_Female - High_Female;<br>Low_Male - High_Female;<br>Medium_Female - High_Female;<br>Medium_Male - High_Female;<br>Low_Female - High_Male;<br>Low_Male - High_Male;<br>High_Male - Medium_Female;<br>High_Male - Medium_Male;<br>Low_Female - Low_Male;<br>Low_Female - Medium_Female;<br>Low_Female - Medium_Male;<br>Low_Male - Medium_Female;<br>Low_Male - Medium_Male;<br>Medium_Male - Medium_Female | A_33_P3514859                               | XR_108862 | XR_108862 |

|    |      |                                                                    |        |            |        |          |                                                                                                                                                                                                                                                                                                                                                                                                                                           |               |           |           |
|----|------|--------------------------------------------------------------------|--------|------------|--------|----------|-------------------------------------------------------------------------------------------------------------------------------------------------------------------------------------------------------------------------------------------------------------------------------------------------------------------------------------------------------------------------------------------------------------------------------------------|---------------|-----------|-----------|
| 75 | 1    | LOC10065295<br>uncharacterized LOC100652951                        | 4.9439 | 0.00091386 | 3.0391 | 0.060549 | High_Male - High_Female;<br>Low_Female - High_Female;<br>Low_Male - High_Female;<br>High_Female - Medium_Female;<br>Medium_Male - High_Female;<br>Low_Female - High_Male;<br>Low_Male - High_Male;<br>High_Male - Medium_Female;<br>Medium_Male - High_Male;<br>Low_Male - Low_Female;<br>Low_Female - Medium_Female;<br>Low_Female - Medium_Male;<br>Low_Male - Medium_Female;<br>Low_Male - Medium_Male;<br>Medium_Male - Medium_Female | A_21_P0014898 | XR_132888 | XR_132888 |
| 76 | ABP1 | amiloride binding protein 1 (amine oxidase<br>(copper-containing)) | 4.9391 | 0.00092053 | 3.036  | 0.060549 | High_Male - High_Female;<br>High_Female - Low_Female;<br>High_Female - Low_Male;<br>Medium_Female - High_Female;<br>Medium_Male - High_Female;<br>High_Male - Low_Female;<br>High_Male - Low_Male;<br>High_Male - Medium_Female;<br>Medium_Male - High_Male;<br>Low_Female - Low_Male;<br>Medium_Female - Low_Female;<br>Medium_Male - Low_Female;<br>Medium_Female - Low_Male;<br>Medium_Male - Low_Male;<br>Medium_Male - Medium_Female | A_23_P59452   | NM_001091 | NM_001091 |

|    |             |                      |        |            |        |          |                                                                                                                                                                                                                                                                                                                                                                                                                                           |                                                                           |           |           |
|----|-------------|----------------------|--------|------------|--------|----------|-------------------------------------------------------------------------------------------------------------------------------------------------------------------------------------------------------------------------------------------------------------------------------------------------------------------------------------------------------------------------------------------------------------------------------------------|---------------------------------------------------------------------------|-----------|-----------|
| 77 | XLOC_011047 |                      | 4.9145 | 0.00095515 | 3.0199 | 0.062011 | High_Male - High_Female;<br>Low_Female - High_Female;<br>Low_Male - High_Female;<br>High_Female - Medium_Female;<br>Medium_Male - High_Female;<br>High_Male - Low_Female;<br>High_Male - Low_Male;<br>High_Male - Medium_Female;<br>Medium_Male - High_Male;<br>Low_Male - Low_Female;<br>Low_Female - Medium_Female;<br>Medium_Male - Low_Female;<br>Low_Male - Medium_Female;<br>Medium_Male - Low_Male;<br>Medium_Male - Medium_Female | tc THC2533854 linc TCONS_00023118 linc TCONS_00023117 linc TCONS_00022763 |           |           |
| 78 | BTG2        | BTG family, member 2 | 4.8941 | 0.00098504 | 3.0065 | 0.06252  | High_Male - High_Female;<br>Low_Female - High_Female;<br>Low_Male - High_Female;<br>Medium_Female - High_Female;<br>Medium_Male - High_Female;<br>Low_Female - High_Male;<br>Low_Male - High_Male;<br>High_Male - Medium_Female;<br>High_Male - Medium_Male;<br>Low_Male - Low_Female;<br>Low_Female - Medium_Female;<br>Low_Female - Medium_Male;<br>Low_Male - Medium_Female;<br>Low_Male - Medium_Male;<br>Medium_Male - Medium_Female | A_23_P62901                                                               | NM_006763 | NM_006763 |

|    |                  |                               |        |            |        |          |                                                                                                                                                                                                                                                                                                                                                                                                                                           |                |           |           |
|----|------------------|-------------------------------|--------|------------|--------|----------|-------------------------------------------------------------------------------------------------------------------------------------------------------------------------------------------------------------------------------------------------------------------------------------------------------------------------------------------------------------------------------------------------------------------------------------------|----------------|-----------|-----------|
| 79 | LOC10050725<br>4 | uncharacterized LOC100507254  | 4.8921 | 0.00098801 | 3.0052 | 0.06252  | High_Male - High_Female;<br>Low_Female - High_Female;<br>Low_Male - High_Female;<br>Medium_Female - High_Female;<br>Medium_Male - High_Female;<br>Low_Female - High_Male;<br>Low_Male - High_Male;<br>Medium_Female - High_Male;<br>Medium_Male - High_Male;<br>Low_Male - Low_Female;<br>Medium_Female - Low_Female;<br>Medium_Male - Low_Female;<br>Medium_Female - Low_Male;<br>Medium_Male - Low_Male;<br>Medium_Male - Medium_Female | A_19_P00322058 | NR_038981 | NR_038981 |
| 80 | ATOH8            | atonal homolog 8 (Drosophila) | 4.8725 | 0.0010176  | 2.9924 | 0.063587 | High_Male - High_Female;<br>Low_Female - High_Female;<br>Low_Male - High_Female;<br>Medium_Female - High_Female;<br>Medium_Male - High_Female;<br>Low_Female - High_Male;<br>High_Male - Low_Male;<br>High_Male - Medium_Female;<br>High_Male - Medium_Male;<br>Low_Female - Low_Male;<br>Low_Female - Medium_Female;<br>Low_Female - Medium_Male;<br>Low_Male - Medium_Female;<br>Low_Male - Medium_Male;<br>Medium_Female - Medium_Male | A_33_P3392740  |           | AL831857  |

|    |           |                                       |        |           |        |          |                                                                                                                                                                                                                                                                                                                                                                                                                                           |               |              |              |
|----|-----------|---------------------------------------|--------|-----------|--------|----------|-------------------------------------------------------------------------------------------------------------------------------------------------------------------------------------------------------------------------------------------------------------------------------------------------------------------------------------------------------------------------------------------------------------------------------------------|---------------|--------------|--------------|
| 81 | SEC14L3   | SEC14-like 3 ( <i>S. cerevisiae</i> ) | 4.8144 | 0.0011107 | 2.9544 | 0.067958 | High_Male - High_Female;<br>Low_Female - High_Female;<br>Low_Male - High_Female;<br>Medium_Female - High_Female;<br>High_Female - Medium_Male;<br>Low_Female - High_Male;<br>Low_Male - High_Male;<br>Medium_Female - High_Male;<br>High_Male - Medium_Male;<br>Low_Male - Low_Female;<br>Low_Female - Medium_Female;<br>Low_Female - Medium_Male;<br>Low_Male - Medium_Female;<br>Low_Male - Medium_Male;<br>Medium_Female - Medium_Male | A_33_P3383551 |              | AK131358     |
| 82 | LOC391322 | D-dopachrome tautomerase-like         | 4.812  | 0.0011147 | 2.9528 | 0.067958 | High_Female - High_Male;<br>Low_Female - High_Female;<br>Low_Male - High_Female;<br>High_Female - Medium_Female;<br>High_Female - Medium_Male;<br>Low_Female - High_Male;<br>Low_Male - High_Male;<br>High_Male - Medium_Female;<br>Medium_Male - High_Male;<br>Low_Male - Low_Female;<br>Low_Female - Medium_Female;<br>Low_Female - Medium_Male;<br>Low_Male - Medium_Female;<br>Low_Male - Medium_Male;<br>Medium_Male - Medium_Female | A_33_P3379341 | NM_001144931 | NM_001144931 |

|    |             |                                   |        |           |        |          |                                                                                                                                                                                                                                                                                                                                                                                                                                           |                                                                     |           |           |
|----|-------------|-----------------------------------|--------|-----------|--------|----------|-------------------------------------------------------------------------------------------------------------------------------------------------------------------------------------------------------------------------------------------------------------------------------------------------------------------------------------------------------------------------------------------------------------------------------------------|---------------------------------------------------------------------|-----------|-----------|
| 83 | DDIT4       | DNA-damage-inducible transcript 4 | 4.8038 | 0.0011287 | 2.9474 | 0.06798  | High_Male - High_Female;<br>High_Female - Low_Female;<br>Low_Male - High_Female;<br>High_Female - Medium_Female;<br>Medium_Male - High_Female;<br>High_Male - Low_Female;<br>Low_Male - High_Male;<br>High_Male - Medium_Female;<br>High_Male - Medium_Male;<br>Low_Male - Low_Female;<br>Low_Female - Medium_Female;<br>Medium_Male - Low_Female;<br>Low_Male - Medium_Female;<br>Low_Male - Medium_Male;<br>Medium_Male - Medium_Female | A_23_P104318                                                        | NM_019058 | NM_019058 |
| 84 | XLOC_012043 |                                   | 4.7882 | 0.0011555 | 2.9372 | 0.068769 | High_Male - High_Female;<br>Low_Female - High_Female;<br>Low_Male - High_Female;<br>Medium_Female - High_Female;<br>High_Female - Medium_Male;<br>Low_Female - High_Male;<br>High_Male - Low_Male;<br>Medium_Female - High_Male;<br>High_Male - Medium_Male;<br>Low_Female - Low_Male;<br>Low_Female - Medium_Female;<br>Low_Female - Medium_Male;<br>Medium_Female - Low_Male;<br>Low_Male - Medium_Male;<br>Medium_Female - Medium_Male | linc TCONS_00025079 linc TC<br>ONS_00025080 linc TCONS_0<br>0024759 |           |           |

|    |                  |                              |        |           |        |          |                                                                                                                                                                                                                                                                                                                                                                                                                                           |                |           |           |
|----|------------------|------------------------------|--------|-----------|--------|----------|-------------------------------------------------------------------------------------------------------------------------------------------------------------------------------------------------------------------------------------------------------------------------------------------------------------------------------------------------------------------------------------------------------------------------------------------|----------------|-----------|-----------|
| 85 | LOC10050754<br>0 | uncharacterized LOC100507540 | 4.7452 | 0.0012333 | 2.9089 | 0.072534 | High_Male - High_Female;<br>Low_Female - High_Female;<br>High_Female - Low_Male;<br>Medium_Female - High_Female;<br>Medium_Male - High_Female;<br>High_Male - Low_Female;<br>High_Male - Low_Male;<br>High_Male - Medium_Female;<br>High_Male - Medium_Male;<br>Low_Female - Low_Male;<br>Medium_Female - Low_Female;<br>Medium_Male - Low_Female;<br>Medium_Female - Low_Male;<br>Medium_Male - Low_Male;<br>Medium_Male - Medium_Female | A_21_P0013589  | XR_108989 | XR_108989 |
| 86 | CYP1B1-AS1       |                              | 4.6971 | 0.0013267 | 2.8772 | 0.077117 | High_Female - High_Male;<br>High_Female - Low_Female;<br>High_Female - Low_Male;<br>High_Female - Medium_Female;<br>High_Female - Medium_Male;<br>High_Male - Low_Female;<br>High_Male - Low_Male;<br>High_Male - Medium_Female;<br>Medium_Male - High_Male;<br>Low_Female - Low_Male;<br>Medium_Female - Low_Female;<br>Medium_Male - Low_Female;<br>Medium_Female - Low_Male;<br>Medium_Male - Low_Male;<br>Medium_Male - Medium_Female | A_19_P00807643 | NR_027252 | NR_027252 |

|    |             |                              |        |           |        |          |                                                                                                                                                                                                                                                                                                                                                                                                                                           |               |              |              |
|----|-------------|------------------------------|--------|-----------|--------|----------|-------------------------------------------------------------------------------------------------------------------------------------------------------------------------------------------------------------------------------------------------------------------------------------------------------------------------------------------------------------------------------------------------------------------------------------------|---------------|--------------|--------------|
| 87 | XLOC_008151 |                              | 4.6765 | 0.0013689 | 2.8636 | 0.078658 | High_Male - High_Female;<br>Low_Female - High_Female;<br>Low_Male - High_Female;<br>Medium_Female - High_Female;<br>Medium_Male - High_Female;<br>Low_Female - High_Male;<br>Low_Male - High_Male;<br>High_Male - Medium_Female;<br>High_Male - Medium_Male;<br>Low_Female - Low_Male;<br>Low_Female - Medium_Female;<br>Low_Female - Medium_Male;<br>Low_Male - Medium_Female;<br>Low_Male - Medium_Male;<br>Medium_Female - Medium_Male | A_21_P0006579 |              | BC015977     |
| 88 | TBC1D7      | TBC1 domain family, member 7 | 4.6346 | 0.0014589 | 2.836  | 0.082878 | High_Male - High_Female;<br>Low_Female - High_Female;<br>Low_Male - High_Female;<br>Medium_Female - High_Female;<br>Medium_Male - High_Female;<br>Low_Female - High_Male;<br>Low_Male - High_Male;<br>High_Male - Medium_Female;<br>High_Male - Medium_Male;<br>Low_Female - Low_Male;<br>Low_Female - Medium_Female;<br>Low_Female - Medium_Male;<br>Low_Male - Medium_Female;<br>Low_Male - Medium_Male;<br>Medium_Female - Medium_Male | A_33_P3311907 | NM_001143965 | NM_001143965 |



|    |       |                                                                                         |        |           |        |          |                                                                                                                                                                                                                                                                                                                                                                                                                                           |              |           |           |
|----|-------|-----------------------------------------------------------------------------------------|--------|-----------|--------|----------|-------------------------------------------------------------------------------------------------------------------------------------------------------------------------------------------------------------------------------------------------------------------------------------------------------------------------------------------------------------------------------------------------------------------------------------------|--------------|-----------|-----------|
| 89 | VAT1  | vesicle amine transport protein 1 homolog<br>(T. californica)                           | 4.6119 | 0.0015102 | 2.821  | 0.084826 | High_Male - High_Female;<br>Low_Female - High_Female;<br>Low_Male - High_Female;<br>Medium_Female - High_Female;<br>Medium_Male - High_Female;<br>Low_Female - High_Male;<br>High_Male - Low_Male;<br>Medium_Female - High_Male;<br>High_Male - Medium_Male;<br>Low_Female - Low_Male;<br>Low_Female - Medium_Female;<br>Low_Female - Medium_Male;<br>Medium_Female - Low_Male;<br>Low_Male - Medium_Male;<br>Medium_Female - Medium_Male | A_24_P152527 | NM_006373 | NM_006373 |
| 90 | SMPD3 | sphingomyelin phosphodiesterase 3,<br>neutral membrane (neutral<br>sphingomyelinase II) | 4.6038 | 0.001529  | 2.8156 | 0.084925 | High_Male - High_Female;<br>Low_Female - High_Female;<br>Low_Male - High_Female;<br>Medium_Female - High_Female;<br>Medium_Male - High_Female;<br>High_Male - Low_Female;<br>High_Male - Low_Male;<br>High_Male - Medium_Female;<br>Medium_Male - High_Male;<br>Low_Male - Low_Female;<br>Medium_Female - Low_Female;<br>Medium_Male - Low_Female;<br>Medium_Female - Low_Male;<br>Medium_Male - Low_Male;<br>Medium_Male - Medium_Female | A_23_P163567 | NM_018667 | NM_018667 |

|    |         |                                                        |        |           |        |          |                                                                                                                                                                                                                                                                                                                                                                                                                                           |              |           |           |
|----|---------|--------------------------------------------------------|--------|-----------|--------|----------|-------------------------------------------------------------------------------------------------------------------------------------------------------------------------------------------------------------------------------------------------------------------------------------------------------------------------------------------------------------------------------------------------------------------------------------------|--------------|-----------|-----------|
| 91 | CYP4F12 | cytochrome P450, family 4, subfamily F, polypeptide 12 | 4.5762 | 0.0015948 | 2.7973 | 0.087493 | High_Male - High_Female;<br>High_Female - Low_Female;<br>High_Female - Low_Male;<br>High_Female - Medium_Female;<br>Medium_Male - High_Female;<br>High_Male - Low_Female;<br>High_Male - Low_Male;<br>High_Male - Medium_Female;<br>High_Male - Medium_Male;<br>Low_Male - Low_Female;<br>Medium_Female - Low_Female;<br>Medium_Male - Low_Female;<br>Medium_Female - Low_Male;<br>Medium_Male - Low_Male;<br>Medium_Male - Medium_Female | A_23_P108280 | NM_023944 | NM_023944 |
| 92 | CLC     | Charcot-Leyden crystal protein                         | 4.5698 | 0.0016102 | 2.7931 | 0.087493 | High_Male - High_Female;<br>Low_Female - High_Female;<br>Low_Male - High_Female;<br>Medium_Female - High_Female;<br>Medium_Male - High_Female;<br>High_Male - Low_Female;<br>High_Male - Low_Male;<br>High_Male - Medium_Female;<br>High_Male - Medium_Male;<br>Low_Male - Low_Female;<br>Medium_Female - Low_Female;<br>Medium_Male - Low_Female;<br>Medium_Female - Low_Male;<br>Medium_Male - Low_Male;<br>Medium_Male - Medium_Female | A_23_P101683 | NM_001828 | NM_001828 |

|    |                    |                                |        |           |        |          |                                                                                                                                                                                                                                                                                                                                                                                                                                           |               |           |           |
|----|--------------------|--------------------------------|--------|-----------|--------|----------|-------------------------------------------------------------------------------------------------------------------------------------------------------------------------------------------------------------------------------------------------------------------------------------------------------------------------------------------------------------------------------------------------------------------------------------------|---------------|-----------|-----------|
| 93 | RHOXF1             | Rhox homeobox family, member 1 | 4.5192 | 0.0017398 | 2.7595 | 0.093521 | High_Female - High_Male;<br>Low_Female - High_Female;<br>Low_Male - High_Female;<br>High_Female - Medium_Female;<br>High_Female - Medium_Male;<br>Low_Female - High_Male;<br>Low_Male - High_Male;<br>Medium_Female - High_Male;<br>Medium_Male - High_Male;<br>Low_Female - Low_Male;<br>Low_Female - Medium_Female;<br>Low_Female - Medium_Male;<br>Low_Male - Medium_Female;<br>Low_Male - Medium_Male;<br>Medium_Female - Medium_Male | A_23_P85082   | NM_139282 | NM_139282 |
| 94 | XLOC_I2_0151<br>78 |                                | 4.4652 | 0.0018898 | 2.7236 | 0.1005   | High_Male - High_Female;<br>Low_Female - High_Female;<br>Low_Male - High_Female;<br>Medium_Female - High_Female;<br>Medium_Male - High_Female;<br>Low_Female - High_Male;<br>Low_Male - High_Male;<br>Medium_Female - High_Male;<br>Medium_Male - High_Male;<br>Low_Male - Low_Female;<br>Medium_Female - Low_Female;<br>Medium_Male - Low_Female;<br>Medium_Female - Low_Male;<br>Medium_Male - Low_Male;<br>Medium_Male - Medium_Female | A_21_P0013637 |           | CB121594  |

|    |         |                                                                 |       |           |        |         |                                                                                                                                                                                                                                                                                                                                                                                                                                           |               |           |           |
|----|---------|-----------------------------------------------------------------|-------|-----------|--------|---------|-------------------------------------------------------------------------------------------------------------------------------------------------------------------------------------------------------------------------------------------------------------------------------------------------------------------------------------------------------------------------------------------------------------------------------------------|---------------|-----------|-----------|
| 95 | EMR1    | egf-like module containing, mucin-like, hormone receptor-like 1 | 4.447 | 0.0019432 | 2.7115 | 0.10225 | High_Male - High_Female;<br>Low_Female - High_Female;<br>Low_Male - High_Female;<br>Medium_Female - High_Female;<br>Medium_Male - High_Female;<br>High_Male - Low_Female;<br>High_Male - Low_Male;<br>High_Male - Medium_Female;<br>High_Male - Medium_Male;<br>Low_Male - Low_Female;<br>Medium_Female - Low_Female;<br>Medium_Male - Low_Female;<br>Medium_Female - Low_Male;<br>Medium_Male - Low_Male;<br>Medium_Male - Medium_Female | A_33_P3215803 | NM_001974 | NM_001974 |
| 96 | SIGLEC8 | sialic acid binding Ig-like lectin 8                            | 4.428 | 0.0020006 | 2.6988 | 0.10315 | High_Male - High_Female;<br>Low_Female - High_Female;<br>Low_Male - High_Female;<br>Medium_Female - High_Female;<br>Medium_Male - High_Female;<br>High_Male - Low_Female;<br>High_Male - Low_Male;<br>High_Male - Medium_Female;<br>Medium_Male - High_Male;<br>Low_Male - Low_Female;<br>Medium_Female - Low_Female;<br>Medium_Male - Low_Female;<br>Medium_Female - Low_Male;<br>Medium_Male - Low_Male;<br>Medium_Male - Medium_Female | A_24_P40001   | NM_014442 | NM_014442 |

|    |         |                                                                                                  |        |           |        |         |                                                                                                                                                                                                                                                                                                                                                                                                                                           |               |              |              |
|----|---------|--------------------------------------------------------------------------------------------------|--------|-----------|--------|---------|-------------------------------------------------------------------------------------------------------------------------------------------------------------------------------------------------------------------------------------------------------------------------------------------------------------------------------------------------------------------------------------------------------------------------------------------|---------------|--------------|--------------|
| 97 | GALNT14 | UDP-N-acetyl-alpha-D-galactosamine:polypeptide N-acetylgalactosaminyltransferase 14 (GalNAc-T14) | 4.4164 | 0.0020365 | 2.6911 | 0.10315 | High_Female - High_Male;<br>High_Female - Low_Female;<br>High_Female - Low_Male;<br>Medium_Female - High_Female;<br>High_Female - Medium_Male;<br>High_Male - Low_Female;<br>High_Male - Low_Male;<br>Medium_Female - High_Male;<br>Medium_Male - High_Male;<br>Low_Female - Low_Male;<br>Medium_Female - Low_Female;<br>Medium_Male - Low_Female;<br>Medium_Female - Low_Male;<br>Medium_Male - Low_Male;<br>Medium_Female - Medium_Male | A_23_P67847   | NM_024572    | NM_024572    |
| 98 | OR2M7   | olfactory receptor, family 2, subfamily M, member 7                                              | 4.4146 | 0.0020423 | 2.6899 | 0.10315 | High_Male - High_Female;<br>Low_Female - High_Female;<br>Low_Male - High_Female;<br>Medium_Female - High_Female;<br>Medium_Male - High_Female;<br>Low_Female - High_Male;<br>High_Male - Low_Male;<br>Medium_Female - High_Male;<br>High_Male - Medium_Male;<br>Low_Female - Low_Male;<br>Low_Female - Medium_Female;<br>Low_Female - Medium_Male;<br>Medium_Female - Low_Male;<br>Medium_Male - Low_Male;<br>Medium_Female - Medium_Male | A_33_P3311046 | NM_001004691 | NM_001004691 |

|     |        |                                           |        |           |        |         |                                                                                                                                                                                                                                                                                                                                                                                                                                           |              |           |           |
|-----|--------|-------------------------------------------|--------|-----------|--------|---------|-------------------------------------------------------------------------------------------------------------------------------------------------------------------------------------------------------------------------------------------------------------------------------------------------------------------------------------------------------------------------------------------------------------------------------------------|--------------|-----------|-----------|
| 99  | SHISA4 | shisa homolog 4 ( <i>Xenopus laevis</i> ) | 4.4144 | 0.0020428 | 2.6898 | 0.10315 | High_Male - High_Female;<br>Low_Female - High_Female;<br>Low_Male - High_Female;<br>Medium_Female - High_Female;<br>Medium_Male - High_Female;<br>Low_Female - High_Male;<br>Low_Male - High_Male;<br>High_Male - Medium_Female;<br>High_Male - Medium_Male;<br>Low_Male - Low_Female;<br>Low_Female - Medium_Female;<br>Low_Female - Medium_Male;<br>Low_Male - Medium_Female;<br>Low_Male - Medium_Male;<br>Medium_Male - Medium_Female | A_23_P115573 | NM_198149 | NM_198149 |
| 100 | CST7   | cystatin F (leukocystatin)                | 4.4055 | 0.002071  | 2.6838 | 0.10353 | High_Female - High_Male;<br>High_Female - Low_Female;<br>High_Female - Low_Male;<br>High_Female - Medium_Female;<br>High_Female - Medium_Male;<br>Low_Female - High_Male;<br>High_Male - Low_Male;<br>Medium_Female - High_Male;<br>Medium_Male - High_Male;<br>Low_Female - Low_Male;<br>Medium_Female - Low_Female;<br>Medium_Male - Low_Female;<br>Medium_Female - Low_Male;<br>Medium_Male - Low_Male;<br>Medium_Male - Medium_Female | A_23_P68601  | NM_003650 | NM_003650 |

|     |       |                                 |        |           |        |         |                                                                                                                                                                                                                                                                                                                                                                                                                                           |               |           |           |
|-----|-------|---------------------------------|--------|-----------|--------|---------|-------------------------------------------------------------------------------------------------------------------------------------------------------------------------------------------------------------------------------------------------------------------------------------------------------------------------------------------------------------------------------------------------------------------------------------------|---------------|-----------|-----------|
| 101 | CCL23 | chemokine (C-C motif) ligand 23 | 4.3906 | 0.002119  | 2.6739 | 0.10488 | High_Male - High_Female;<br>Low_Female - High_Female;<br>Low_Male - High_Female;<br>Medium_Female - High_Female;<br>Medium_Male - High_Female;<br>High_Male - Low_Female;<br>High_Male - Low_Male;<br>High_Male - Medium_Female;<br>Medium_Male - High_Male;<br>Low_Male - Low_Female;<br>Medium_Female - Low_Female;<br>Medium_Male - Low_Female;<br>Low_Male - Medium_Female;<br>Medium_Male - Low_Male;<br>Medium_Male - Medium_Female | A_24_P133905  | NM_005064 | NM_005064 |
| 102 |       |                                 | 4.3741 | 0.0021735 | 2.6628 | 0.10652 | High_Male - High_Female;<br>Low_Female - High_Female;<br>Low_Male - High_Female;<br>Medium_Female - High_Female;<br>Medium_Male - High_Female;<br>High_Male - Low_Female;<br>High_Male - Low_Male;<br>High_Male - Medium_Female;<br>Medium_Male - High_Male;<br>Low_Male - Low_Female;<br>Medium_Female - Low_Female;<br>Medium_Male - Low_Female;<br>Low_Male - Medium_Female;<br>Medium_Male - Low_Male;<br>Medium_Male - Medium_Female | tc THC2567789 |           |           |

|     |         |                                    |        |           |        |         |                                                                                                                                                                                                                                                                                                                                                                                                                                           |              |           |           |
|-----|---------|------------------------------------|--------|-----------|--------|---------|-------------------------------------------------------------------------------------------------------------------------------------------------------------------------------------------------------------------------------------------------------------------------------------------------------------------------------------------------------------------------------------------------------------------------------------------|--------------|-----------|-----------|
| 103 | C9orf40 | chromosome 9 open reading frame 40 | 4.3663 | 0.0021997 | 2.6576 | 0.10676 | High_Male - High_Female;<br>High_Female - Low_Female;<br>High_Female - Low_Male;<br>Medium_Female - High_Female;<br>Medium_Male - High_Female;<br>High_Male - Low_Female;<br>High_Male - Low_Male;<br>High_Male - Medium_Female;<br>High_Male - Medium_Male;<br>Low_Female - Low_Male;<br>Medium_Female - Low_Female;<br>Medium_Male - Low_Female;<br>Medium_Female - Low_Male;<br>Medium_Male - Low_Male;<br>Medium_Male - Medium_Female | A_23_P43425  | NM_017998 | NM_017998 |
| 104 | SPNS3   | spinster homolog 3 (Drosophila)    | 4.3086 | 0.0024042 | 2.619  | 0.11556 | High_Male - High_Female;<br>Low_Female - High_Female;<br>Low_Male - High_Female;<br>Medium_Female - High_Female;<br>Medium_Male - High_Female;<br>High_Male - Low_Female;<br>High_Male - Low_Male;<br>High_Male - Medium_Female;<br>High_Male - Medium_Male;<br>Low_Male - Low_Female;<br>Medium_Female - Low_Female;<br>Medium_Male - Low_Female;<br>Low_Male - Medium_Female;<br>Medium_Male - Low_Male;<br>Medium_Male - Medium_Female | A_23_P100963 | NM_182538 | NM_182538 |



|     |        |                                                        |        |           |        |         |                                                                                                                                                                                                                                                                                                                                                                                                                                           |               |           |           |
|-----|--------|--------------------------------------------------------|--------|-----------|--------|---------|-------------------------------------------------------------------------------------------------------------------------------------------------------------------------------------------------------------------------------------------------------------------------------------------------------------------------------------------------------------------------------------------------------------------------------------------|---------------|-----------|-----------|
| 105 | AREG   | amphiregulin                                           | 4.2829 | 0.0025014 | 2.6018 | 0.11909 | High_Male - High_Female;<br>Low_Female - High_Female;<br>Low_Male - High_Female;<br>Medium_Female - High_Female;<br>Medium_Male - High_Female;<br>High_Male - Low_Female;<br>Low_Male - High_Male;<br>High_Male - Medium_Female;<br>High_Male - Medium_Male;<br>Low_Male - Low_Female;<br>Low_Female - Medium_Female;<br>Medium_Male - Low_Female;<br>Low_Male - Medium_Female;<br>Low_Male - Medium_Male;<br>Medium_Male - Medium_Female | A_33_P3419190 | NM_001657 | NM_001657 |
| 106 | CACNG6 | calcium channel, voltage-dependent,<br>gamma subunit 6 | 4.2677 | 0.0025609 | 2.5916 | 0.12077 | High_Male - High_Female;<br>Low_Female - High_Female;<br>Low_Male - High_Female;<br>Medium_Female - High_Female;<br>Medium_Male - High_Female;<br>High_Male - Low_Female;<br>High_Male - Low_Male;<br>High_Male - Medium_Female;<br>High_Male - Medium_Male;<br>Low_Male - Low_Female;<br>Medium_Female - Low_Female;<br>Medium_Male - Low_Female;<br>Low_Male - Medium_Female;<br>Medium_Male - Low_Male;<br>Medium_Male - Medium_Female | A_23_P501933  | NM_145814 | NM_145814 |

|     |      |                               |        |           |        |         |                                                                                                                                                                                                                                                                                                                                                                                                                                           |               |           |           |
|-----|------|-------------------------------|--------|-----------|--------|---------|-------------------------------------------------------------------------------------------------------------------------------------------------------------------------------------------------------------------------------------------------------------------------------------------------------------------------------------------------------------------------------------------------------------------------------------------|---------------|-----------|-----------|
| 107 | TFF3 | trefoil factor 3 (intestinal) | 4.2173 | 0.0027685 | 2.5578 | 0.12909 | High_Male - High_Female;<br>High_Female - Low_Female;<br>Low_Male - High_Female;<br>Medium_Female - High_Female;<br>Medium_Male - High_Female;<br>High_Male - Low_Female;<br>High_Male - Low_Male;<br>High_Male - Medium_Female;<br>High_Male - Medium_Male;<br>Low_Male - Low_Female;<br>Medium_Female - Low_Female;<br>Medium_Male - Low_Female;<br>Medium_Female - Low_Male;<br>Medium_Male - Low_Male;<br>Medium_Male - Medium_Female | A_33_P3334305 | NM_003226 | NM_003226 |
| 108 | CA14 | carbonic anhydrase XIV        | 4.2125 | 0.002789  | 2.5546 | 0.12909 | High_Male - High_Female;<br>Low_Female - High_Female;<br>Low_Male - High_Female;<br>Medium_Female - High_Female;<br>High_Female - Medium_Male;<br>Low_Female - High_Male;<br>Low_Male - High_Male;<br>High_Male - Medium_Female;<br>High_Male - Medium_Male;<br>Low_Female - Low_Male;<br>Low_Female - Medium_Female;<br>Low_Female - Medium_Male;<br>Low_Male - Medium_Female;<br>Low_Male - Medium_Male;<br>Medium_Female - Medium_Male | A_23_P63379   | NM_012113 | NM_012113 |

|     |        |                                                 |        |           |        |         |                                                                                                                                                                                                                                                                                                                                                                                                                                           |                |              |              |
|-----|--------|-------------------------------------------------|--------|-----------|--------|---------|-------------------------------------------------------------------------------------------------------------------------------------------------------------------------------------------------------------------------------------------------------------------------------------------------------------------------------------------------------------------------------------------------------------------------------------------|----------------|--------------|--------------|
| 109 | PIK3R6 | phosphoinositide-3-kinase, regulatory subunit 6 | 4.1926 | 0.0028763 | 2.5412 | 0.13192 | High_Male - High_Female;<br>High_Female - Low_Female;<br>High_Female - Low_Male;<br>Medium_Female - High_Female;<br>Medium_Male - High_Female;<br>High_Male - Low_Female;<br>High_Male - Low_Male;<br>Medium_Female - High_Male;<br>Medium_Male - High_Male;<br>Low_Male - Low_Female;<br>Medium_Female - Low_Female;<br>Medium_Male - Low_Female;<br>Medium_Female - Low_Male;<br>Medium_Male - Low_Male;<br>Medium_Male - Medium_Female | A_24_P366509   | NM_001010855 | NM_001010855 |
| 110 | TSIX   |                                                 | 4.1833 | 0.0029182 | 2.5349 | 0.13262 | High_Female - High_Male;<br>High_Female - Low_Female;<br>High_Female - Low_Male;<br>High_Female - Medium_Female;<br>High_Female - Medium_Male;<br>Low_Female - High_Male;<br>High_Male - Low_Male;<br>High_Male - Medium_Female;<br>High_Male - Medium_Male;<br>Low_Female - Low_Male;<br>Low_Female - Medium_Female;<br>Low_Female - Medium_Male;<br>Medium_Female - Low_Male;<br>Medium_Male - Low_Male;<br>Medium_Female - Medium_Male | A_19_P00316565 | NR_003255    | NR_003255    |

|     |       |                                                |        |           |        |         |                                                                                                                                                                                                                                                                                                                                                                                                                                           |               |           |           |
|-----|-------|------------------------------------------------|--------|-----------|--------|---------|-------------------------------------------------------------------------------------------------------------------------------------------------------------------------------------------------------------------------------------------------------------------------------------------------------------------------------------------------------------------------------------------------------------------------------------------|---------------|-----------|-----------|
| 111 | USP9Y | ubiquitin specific peptidase 9, Y-linked       | 4.1761 | 0.002951  | 2.53   | 0.1329  | High_Male - High_Female;<br>Low_Female - High_Female;<br>Low_Male - High_Female;<br>Medium_Female - High_Female;<br>Medium_Male - High_Female;<br>Low_Female - High_Male;<br>Low_Male - High_Male;<br>Medium_Female - High_Male;<br>Medium_Male - High_Male;<br>Low_Male - Low_Female;<br>Low_Female - Medium_Female;<br>Medium_Male - Low_Female;<br>Low_Male - Medium_Female;<br>Low_Male - Medium_Male;<br>Medium_Male - Medium_Female | A_33_P3725324 | NM_004654 | NM_004654 |
| 112 | TAGAP | T-cell activation RhoGTPase activating protein | 4.1487 | 0.0030791 | 2.5116 | 0.13743 | High_Female - High_Male;<br>Low_Female - High_Female;<br>Low_Male - High_Female;<br>Medium_Female - High_Female;<br>Medium_Male - High_Female;<br>Low_Female - High_Male;<br>Low_Male - High_Male;<br>Medium_Female - High_Male;<br>Medium_Male - High_Male;<br>Low_Female - Low_Male;<br>Low_Female - Medium_Female;<br>Low_Female - Medium_Male;<br>Low_Male - Medium_Female;<br>Low_Male - Medium_Male;<br>Medium_Female - Medium_Male | A_23_P339588  | NM_138810 | NM_138810 |

|     |        |                                              |        |           |        |         |                                                                                                                                                                                                                                                                                                                                                                                                                                           |              |           |           |
|-----|--------|----------------------------------------------|--------|-----------|--------|---------|-------------------------------------------------------------------------------------------------------------------------------------------------------------------------------------------------------------------------------------------------------------------------------------------------------------------------------------------------------------------------------------------------------------------------------------------|--------------|-----------|-----------|
| 113 | CELA2B | chymotrypsin-like elastase family, member 2B | 4.1285 | 0.0031769 | 2.498  | 0.14054 | High_Male - High_Female;<br>Low_Female - High_Female;<br>Low_Male - High_Female;<br>Medium_Female - High_Female;<br>Medium_Male - High_Female;<br>Low_Female - High_Male;<br>High_Male - Low_Male;<br>High_Male - Medium_Female;<br>High_Male - Medium_Male;<br>Low_Female - Low_Male;<br>Low_Female - Medium_Female;<br>Low_Female - Medium_Male;<br>Medium_Female - Low_Male;<br>Low_Male - Medium_Male;<br>Medium_Female - Medium_Male | A_23_P51711  | NM_015849 | NM_015849 |
| 114 | MMP19  | matrix metalloproteinase 19                  | 4.113  | 0.0032544 | 2.4875 | 0.14271 | High_Male - High_Female;<br>Low_Female - High_Female;<br>Low_Male - High_Female;<br>Medium_Female - High_Female;<br>Medium_Male - High_Female;<br>Low_Female - High_Male;<br>Low_Male - High_Male;<br>High_Male - Medium_Female;<br>High_Male - Medium_Male;<br>Low_Female - Low_Male;<br>Low_Female - Medium_Female;<br>Low_Female - Medium_Male;<br>Low_Male - Medium_Female;<br>Low_Male - Medium_Male;<br>Medium_Female - Medium_Male | A_24_P184445 | NM_002429 | NM_002429 |

|     |             |                   |        |           |        |         |                                                                                                                                                                                                                                                                                                                                                                                                                                           |               |          |
|-----|-------------|-------------------|--------|-----------|--------|---------|-------------------------------------------------------------------------------------------------------------------------------------------------------------------------------------------------------------------------------------------------------------------------------------------------------------------------------------------------------------------------------------------------------------------------------------------|---------------|----------|
| 115 | BMS1P5      | BMS1 pseudogene 5 | 4.1046 | 0.0032972 | 2.4819 | 0.14312 | High_Male - High_Female;<br>Low_Female - High_Female;<br>Low_Male - High_Female;<br>Medium_Female - High_Female;<br>Medium_Male - High_Female;<br>Low_Female - High_Male;<br>Low_Male - High_Male;<br>Medium_Female - High_Male;<br>Medium_Male - High_Male;<br>Low_Male - Low_Female;<br>Low_Female - Medium_Female;<br>Medium_Male - Low_Female;<br>Low_Male - Medium_Female;<br>Low_Male - Medium_Male;<br>Medium_Male - Medium_Female | A_21_P0010878 | BC065722 |
| 116 | XLOC_005505 |                   | 4.0999 | 0.0033212 | 2.4787 | 0.14312 | High_Male - High_Female;<br>High_Female - Low_Female;<br>Low_Male - High_Female;<br>Medium_Female - High_Female;<br>Medium_Male - High_Female;<br>High_Male - Low_Female;<br>High_Male - Low_Male;<br>High_Male - Medium_Female;<br>Medium_Male - High_Male;<br>Low_Male - Low_Female;<br>Medium_Female - Low_Female;<br>Medium_Male - Low_Female;<br>Low_Male - Medium_Female;<br>Medium_Male - Low_Male;<br>Medium_Male - Medium_Female | A_21_P0004605 | CR607309 |

|     |             |                                                 |        |           |        |         |                                                                                                                                                                                                                                                                                                                                                                                                                                           |                     |           |           |
|-----|-------------|-------------------------------------------------|--------|-----------|--------|---------|-------------------------------------------------------------------------------------------------------------------------------------------------------------------------------------------------------------------------------------------------------------------------------------------------------------------------------------------------------------------------------------------------------------------------------------------|---------------------|-----------|-----------|
| 117 | NR4A2       | nuclear receptor subfamily 4, group A, member 2 | 4.0884 | 0.0033811 | 2.4709 | 0.14446 | High_Male - High_Female;<br>Low_Female - High_Female;<br>Low_Male - High_Female;<br>Medium_Female - High_Female;<br>Medium_Male - High_Female;<br>High_Male - Low_Female;<br>Low_Male - High_Male;<br>High_Male - Medium_Female;<br>High_Male - Medium_Male;<br>Low_Male - Low_Female;<br>Low_Female - Medium_Female;<br>Medium_Male - Low_Female;<br>Low_Male - Medium_Female;<br>Low_Male - Medium_Male;<br>Medium_Male - Medium_Female | A_33_P3299066       | NM_006186 | NM_006186 |
| 118 | XLOC_009548 |                                                 | 4.0826 | 0.0034122 | 2.467  | 0.14455 | High_Female - High_Male;<br>Low_Female - High_Female;<br>Low_Male - High_Female;<br>Medium_Female - High_Female;<br>High_Female - Medium_Male;<br>Low_Female - High_Male;<br>Low_Male - High_Male;<br>Medium_Female - High_Male;<br>High_Male - Medium_Male;<br>Low_Male - Low_Female;<br>Medium_Female - Low_Female;<br>Low_Female - Medium_Male;<br>Medium_Female - Low_Male;<br>Low_Male - Medium_Male;<br>Medium_Female - Medium_Male | linc TCONS_00019754 |           |           |

|     |             |               |        |           |        |         |                                                                                                                                                                                                                                                                                                                                                                                                                                           |                                             |           |           |
|-----|-------------|---------------|--------|-----------|--------|---------|-------------------------------------------------------------------------------------------------------------------------------------------------------------------------------------------------------------------------------------------------------------------------------------------------------------------------------------------------------------------------------------------------------------------------------------------|---------------------------------------------|-----------|-----------|
| 119 | XLOC_002172 |               | 4.0714 | 0.0034717 | 2.4595 | 0.14493 | High_Male - High_Female;<br>Low_Female - High_Female;<br>Low_Male - High_Female;<br>Medium_Female - High_Female;<br>Medium_Male - High_Female;<br>Low_Female - High_Male;<br>Low_Male - High_Male;<br>High_Male - Medium_Female;<br>High_Male - Medium_Male;<br>Low_Female - Low_Male;<br>Low_Female - Medium_Female;<br>Low_Female - Medium_Male;<br>Low_Male - Medium_Female;<br>Low_Male - Medium_Male;<br>Medium_Female - Medium_Male | ens ENST00000437233 linc T<br>CONS_00003324 |           |           |
| 120 | CD69        | CD69 molecule | 4.0651 | 0.0035063 | 2.4551 | 0.14493 | High_Male - High_Female;<br>Low_Female - High_Female;<br>Low_Male - High_Female;<br>High_Female - Medium_Female;<br>Medium_Male - High_Female;<br>High_Male - Low_Female;<br>Low_Male - High_Male;<br>High_Male - Medium_Female;<br>High_Male - Medium_Male;<br>Low_Male - Low_Female;<br>Low_Female - Medium_Female;<br>Medium_Male - Low_Female;<br>Low_Male - Medium_Female;<br>Low_Male - Medium_Male;<br>Medium_Male - Medium_Female | A_23_P87879                                 | NM_001781 | NM_001781 |



|     |        |                             |        |           |        |         |                                                                                                                                                                                                                                                                                                                                                                                                                                           |               |           |           |
|-----|--------|-----------------------------|--------|-----------|--------|---------|-------------------------------------------------------------------------------------------------------------------------------------------------------------------------------------------------------------------------------------------------------------------------------------------------------------------------------------------------------------------------------------------------------------------------------------------|---------------|-----------|-----------|
| 121 | DOCK9  | dedicator of cytokinesis 9  | 4.0647 | 0.0035081 | 2.4549 | 0.14493 | High_Male - High_Female;<br>Low_Female - High_Female;<br>Low_Male - High_Female;<br>High_Female - Medium_Female;<br>High_Female - Medium_Male;<br>Low_Female - High_Male;<br>Low_Male - High_Male;<br>High_Male - Medium_Female;<br>High_Male - Medium_Male;<br>Low_Female - Low_Male;<br>Low_Female - Medium_Female;<br>Low_Female - Medium_Male;<br>Low_Male - Medium_Female;<br>Low_Male - Medium_Male;<br>Medium_Female - Medium_Male | A_33_P3410279 |           | AK090793  |
| 122 | PTGDR2 | prostaglandin D2 receptor 2 | 4.0533 | 0.0035713 | 2.4472 | 0.14559 | High_Male - High_Female;<br>Low_Female - High_Female;<br>Low_Male - High_Female;<br>Medium_Female - High_Female;<br>Medium_Male - High_Female;<br>High_Male - Low_Female;<br>High_Male - Low_Male;<br>High_Male - Medium_Female;<br>High_Male - Medium_Male;<br>Low_Male - Low_Female;<br>Medium_Female - Low_Female;<br>Medium_Male - Low_Female;<br>Medium_Female - Low_Male;<br>Medium_Male - Low_Male;<br>Medium_Male - Medium_Female | A_24_P115932  | NM_004778 | NM_004778 |

|     |        |                              |        |           |        |         |                                                                                                                                                                                                                                                                                                                                                                                                                                           |               |              |              |
|-----|--------|------------------------------|--------|-----------|--------|---------|-------------------------------------------------------------------------------------------------------------------------------------------------------------------------------------------------------------------------------------------------------------------------------------------------------------------------------------------------------------------------------------------------------------------------------------------|---------------|--------------|--------------|
| 123 | PRSS33 | protease, serine, 33         | 4.0509 | 0.0035843 | 2.4456 | 0.14559 | High_Male - High_Female;<br>High_Female - Low_Female;<br>Low_Male - High_Female;<br>Medium_Female - High_Female;<br>Medium_Male - High_Female;<br>High_Male - Low_Female;<br>High_Male - Low_Male;<br>High_Male - Medium_Female;<br>High_Male - Medium_Male;<br>Low_Male - Low_Female;<br>Medium_Female - Low_Female;<br>Medium_Male - Low_Female;<br>Medium_Female - Low_Male;<br>Medium_Male - Low_Male;<br>Medium_Male - Medium_Female | A_33_P3312779 | NM_152891    | NM_152891    |
| 124 | DISC1  | disrupted in schizophrenia 1 | 4.0461 | 0.0036113 | 2.4423 | 0.14559 | High_Female - High_Male;<br>High_Female - Low_Female;<br>High_Female - Low_Male;<br>High_Female - Medium_Female;<br>High_Female - Medium_Male;<br>Low_Female - High_Male;<br>High_Male - Low_Male;<br>Medium_Female - High_Male;<br>High_Male - Medium_Male;<br>Low_Female - Low_Male;<br>Low_Female - Medium_Female;<br>Low_Female - Medium_Male;<br>Medium_Female - Low_Male;<br>Medium_Male - Low_Male;<br>Medium_Female - Medium_Male | A_21_P0000052 | NM_001164554 | NM_001164554 |

|     |       |                                                                            |        |           |        |         |                                                                                                                                                                                                                                                                                                                                                                                                                                           |              |           |           |
|-----|-------|----------------------------------------------------------------------------|--------|-----------|--------|---------|-------------------------------------------------------------------------------------------------------------------------------------------------------------------------------------------------------------------------------------------------------------------------------------------------------------------------------------------------------------------------------------------------------------------------------------------|--------------|-----------|-----------|
| 125 | BAMBI | BMP and activin membrane-bound inhibitor homolog ( <i>Xenopus laevis</i> ) | 4.0261 | 0.0037256 | 2.4288 | 0.14899 | High_Female - High_Male;<br>High_Female - Low_Female;<br>High_Female - Low_Male;<br>High_Female - Medium_Female;<br>Medium_Male - High_Female;<br>High_Male - Low_Female;<br>High_Male - Low_Male;<br>High_Male - Medium_Female;<br>Medium_Male - High_Male;<br>Low_Female - Low_Male;<br>Medium_Female - Low_Female;<br>Medium_Male - Low_Female;<br>Medium_Female - Low_Male;<br>Medium_Male - Low_Male;<br>Medium_Male - Medium_Female | A_23_P52207  | NM_012342 | NM_012342 |
| 126 | AKNA  | AT-hook transcription factor                                               | 4.0191 | 0.0037665 | 2.4241 | 0.14943 | High_Male - High_Female;<br>Low_Female - High_Female;<br>Low_Male - High_Female;<br>Medium_Female - High_Female;<br>Medium_Male - High_Female;<br>Low_Female - High_Male;<br>Low_Male - High_Male;<br>High_Male - Medium_Female;<br>Medium_Male - High_Male;<br>Low_Male - Low_Female;<br>Low_Female - Medium_Female;<br>Low_Female - Medium_Male;<br>Low_Male - Medium_Female;<br>Low_Male - Medium_Male;<br>Medium_Male - Medium_Female | A_24_P912439 |           | AB075848  |

|     |       |                                |        |           |        |         |                                                                                                                                                                                                                                                                                                                                                                                                                                           |              |           |           |
|-----|-------|--------------------------------|--------|-----------|--------|---------|-------------------------------------------------------------------------------------------------------------------------------------------------------------------------------------------------------------------------------------------------------------------------------------------------------------------------------------------------------------------------------------------------------------------------------------------|--------------|-----------|-----------|
| 127 | CCL4  | chemokine (C-C motif) ligand 4 | 3.9996 | 0.0038833 | 2.4108 | 0.15285 | High_Male - High_Female;<br>Low_Female - High_Female;<br>Low_Male - High_Female;<br>Medium_Female - High_Female;<br>Medium_Male - High_Female;<br>High_Male - Low_Female;<br>Low_Male - High_Male;<br>High_Male - Medium_Female;<br>High_Male - Medium_Male;<br>Low_Male - Low_Female;<br>Low_Female - Medium_Female;<br>Medium_Male - Low_Female;<br>Low_Male - Medium_Female;<br>Low_Male - Medium_Male;<br>Medium_Male - Medium_Female | A_23_P207564 | NM_002984 | NM_002984 |
| 128 | LRRN3 | leucine rich repeat neuronal 3 | 3.9862 | 0.0039649 | 2.4018 | 0.15448 | High_Male - High_Female;<br>Low_Female - High_Female;<br>Low_Male - High_Female;<br>Medium_Female - High_Female;<br>Medium_Male - High_Female;<br>High_Male - Low_Female;<br>Low_Male - High_Male;<br>High_Male - Medium_Female;<br>High_Male - Medium_Male;<br>Low_Male - Low_Female;<br>Low_Female - Medium_Female;<br>Low_Female - Medium_Male;<br>Low_Male - Medium_Female;<br>Low_Male - Medium_Male;<br>Medium_Male - Medium_Female | A_23_P31376  | NM_018334 | NM_018334 |

|     |             |                                    |        |           |        |         |                                                                                                                                                                                                                                                                                                                                                                                                                                           |                     |           |           |
|-----|-------------|------------------------------------|--------|-----------|--------|---------|-------------------------------------------------------------------------------------------------------------------------------------------------------------------------------------------------------------------------------------------------------------------------------------------------------------------------------------------------------------------------------------------------------------------------------------------|---------------------|-----------|-----------|
| 129 | C3AR1       | complement component 3a receptor 1 | 3.9828 | 0.0039863 | 2.3994 | 0.15448 | High_Male - High_Female;<br>Low_Female - High_Female;<br>Low_Male - High_Female;<br>Medium_Female - High_Female;<br>Medium_Male - High_Female;<br>High_Male - Low_Female;<br>High_Male - Low_Male;<br>High_Male - Medium_Female;<br>High_Male - Medium_Male;<br>Low_Female - Low_Male;<br>Low_Female - Medium_Female;<br>Medium_Male - Low_Female;<br>Medium_Female - Low_Male;<br>Medium_Male - Low_Male;<br>Medium_Male - Medium_Female | A_23_P2431          | NM_004054 | NM_004054 |
| 130 | XLOC_001595 |                                    | 3.9372 | 0.0042805 | 2.3685 | 0.16456 | High_Female - High_Male;<br>High_Female - Low_Female;<br>High_Female - Low_Male;<br>High_Female - Medium_Female;<br>High_Female - Medium_Male;<br>High_Male - Low_Female;<br>Low_Male - High_Male;<br>High_Male - Medium_Female;<br>Medium_Male - High_Male;<br>Low_Male - Low_Female;<br>Medium_Female - Low_Female;<br>Medium_Male - Low_Female;<br>Low_Male - Medium_Female;<br>Medium_Male - Low_Male;<br>Medium_Male - Medium_Female | linc TCONS_00003799 |           |           |

|     |       |                                   |        |           |        |         |                                                                                                                                                                                                                                                                                                                                                                                                                                           |               |              |              |
|-----|-------|-----------------------------------|--------|-----------|--------|---------|-------------------------------------------------------------------------------------------------------------------------------------------------------------------------------------------------------------------------------------------------------------------------------------------------------------------------------------------------------------------------------------------------------------------------------------------|---------------|--------------|--------------|
| 131 | CCL4  | chemokine (C-C motif) ligand 4    | 3.9325 | 0.0043123 | 2.3653 | 0.16456 | High_Male - High_Female;<br>Low_Female - High_Female;<br>Low_Male - High_Female;<br>Medium_Female - High_Female;<br>Medium_Male - High_Female;<br>High_Male - Low_Female;<br>Low_Male - High_Male;<br>High_Male - Medium_Female;<br>High_Male - Medium_Male;<br>Low_Male - Low_Female;<br>Low_Female - Medium_Female;<br>Medium_Male - Low_Female;<br>Low_Male - Medium_Female;<br>Low_Male - Medium_Male;<br>Medium_Male - Medium_Female | A_33_P3354607 | NM_002984    | NM_002984    |
| 132 | RAB44 | RAB44, member RAS oncogene family | 3.916  | 0.004425  | 2.3541 | 0.16758 | High_Male - High_Female;<br>High_Female - Low_Female;<br>Low_Male - High_Female;<br>Medium_Female - High_Female;<br>Medium_Male - High_Female;<br>High_Male - Low_Female;<br>High_Male - Low_Male;<br>High_Male - Medium_Female;<br>Medium_Male - High_Male;<br>Low_Male - Low_Female;<br>Medium_Female - Low_Female;<br>Medium_Male - Low_Female;<br>Low_Male - Medium_Female;<br>Medium_Male - Low_Male;<br>Medium_Male - Medium_Female | A_33_P3424328 | XM_003403441 | XM_003403441 |

|     |           |                                                            |        |           |        |         |                                                                                                                                                                                                                                                                                                                                                                                                                                           |               |           |           |
|-----|-----------|------------------------------------------------------------|--------|-----------|--------|---------|-------------------------------------------------------------------------------------------------------------------------------------------------------------------------------------------------------------------------------------------------------------------------------------------------------------------------------------------------------------------------------------------------------------------------------------------|---------------|-----------|-----------|
| 133 | CEBPE     | CCAAT/enhancer binding protein (C/EBP),<br>epsilon         | 3.9103 | 0.0044644 | 2.3502 | 0.16771 | High_Male - High_Female;<br>High_Female - Low_Female;<br>Low_Male - High_Female;<br>Medium_Female - High_Female;<br>Medium_Male - High_Female;<br>High_Male - Low_Female;<br>High_Male - Low_Male;<br>High_Male - Medium_Female;<br>High_Male - Medium_Male;<br>Low_Male - Low_Female;<br>Medium_Female - Low_Female;<br>Medium_Male - Low_Female;<br>Medium_Female - Low_Male;<br>Medium_Male - Low_Male;<br>Medium_Male - Medium_Female | A_33_P3387991 | NM_001805 | NM_001805 |
| 134 | LOC643802 | u3 small nucleolar ribonucleoprotein<br>protein MPP10-like | 3.9059 | 0.0044956 | 2.3472 | 0.16771 | High_Female - High_Male;<br>High_Female - Low_Female;<br>High_Female - Low_Male;<br>High_Female - Medium_Female;<br>High_Female - Medium_Male;<br>High_Male - Low_Female;<br>High_Male - Low_Male;<br>High_Male - Medium_Female;<br>High_Male - Medium_Male;<br>Low_Female - Low_Male;<br>Medium_Female - Low_Female;<br>Medium_Male - Low_Female;<br>Medium_Female - Low_Male;<br>Medium_Male - Low_Male;<br>Medium_Male - Medium_Female | A_21_P0011505 |           | BX537874  |

|     |              |                                                          |        |           |        |         |                                                                                                                                                                                                                                                                                                                                                                                                                                           |               |           |           |
|-----|--------------|----------------------------------------------------------|--------|-----------|--------|---------|-------------------------------------------------------------------------------------------------------------------------------------------------------------------------------------------------------------------------------------------------------------------------------------------------------------------------------------------------------------------------------------------------------------------------------------------|---------------|-----------|-----------|
| 135 | RAP1GAP2     | RAP1 GTPase activating protein 2                         | 3.8695 | 0.0047595 | 2.3224 | 0.17615 | High_Female - High_Male;<br>High_Female - Low_Female;<br>High_Female - Low_Male;<br>High_Female - Medium_Female;<br>High_Female - Medium_Male;<br>High_Male - Low_Female;<br>High_Male - Low_Male;<br>High_Male - Medium_Female;<br>High_Male - Medium_Male;<br>Low_Male - Low_Female;<br>Medium_Female - Low_Female;<br>Medium_Male - Low_Female;<br>Medium_Female - Low_Male;<br>Medium_Male - Low_Male;<br>Medium_Male - Medium_Female | A_23_P412214  | NM_015085 | NM_015085 |
| 136 | LOC100129534 | small nuclear ribonucleoprotein polypeptide N pseudogene | 3.8651 | 0.0047922 | 2.3195 | 0.17615 | High_Male - High_Female;<br>Low_Female - High_Female;<br>Low_Male - High_Female;<br>Medium_Female - High_Female;<br>Medium_Male - High_Female;<br>Low_Female - High_Male;<br>Low_Male - High_Male;<br>Medium_Female - High_Male;<br>High_Male - Medium_Male;<br>Low_Male - Low_Female;<br>Low_Female - Medium_Female;<br>Low_Female - Medium_Male;<br>Low_Male - Medium_Female;<br>Low_Male - Medium_Male;<br>Medium_Female - Medium_Male | A_33_P3271395 | NR_024489 | NR_024489 |



|     |       |                                             |        |           |        |         |                                                                                                                                                                                                                                                                                                                                                                                                                                           |               |           |           |
|-----|-------|---------------------------------------------|--------|-----------|--------|---------|-------------------------------------------------------------------------------------------------------------------------------------------------------------------------------------------------------------------------------------------------------------------------------------------------------------------------------------------------------------------------------------------------------------------------------------------|---------------|-----------|-----------|
| 137 | VSTM1 | V-set and transmembrane domain containing 1 | 3.8472 | 0.0049288 | 2.3073 | 0.17966 | High_Male - High_Female;<br>Low_Female - High_Female;<br>Low_Male - High_Female;<br>Medium_Female - High_Female;<br>Medium_Male - High_Female;<br>High_Male - Low_Female;<br>High_Male - Low_Male;<br>High_Male - Medium_Female;<br>Medium_Male - High_Male;<br>Low_Male - Low_Female;<br>Medium_Female - Low_Female;<br>Medium_Male - Low_Female;<br>Medium_Female - Low_Male;<br>Medium_Male - Low_Male;<br>Medium_Male - Medium_Female | A_33_P3514487 | NM_198481 | NM_198481 |
| 138 |       |                                             | 3.8416 | 0.0049723 | 2.3034 | 0.17966 | High_Female - High_Male;<br>High_Female - Low_Female;<br>High_Female - Low_Male;<br>High_Female - Medium_Female;<br>High_Female - Medium_Male;<br>Low_Female - High_Male;<br>High_Male - Low_Male;<br>Medium_Female - High_Male;<br>High_Male - Medium_Male;<br>Low_Female - Low_Male;<br>Medium_Female - Low_Female;<br>Low_Female - Medium_Male;<br>Medium_Female - Low_Male;<br>Medium_Male - Low_Male;<br>Medium_Female - Medium_Male | A_33_P3343394 |           |           |

|     |       |                                  |        |           |        |         |                                                                                                                                                                                                                                                                                                                                                                                                                                           |              |           |           |
|-----|-------|----------------------------------|--------|-----------|--------|---------|-------------------------------------------------------------------------------------------------------------------------------------------------------------------------------------------------------------------------------------------------------------------------------------------------------------------------------------------------------------------------------------------------------------------------------------------|--------------|-----------|-----------|
| 139 | CCR3  | chemokine (C-C motif) receptor 3 | 3.8386 | 0.0049957 | 2.3014 | 0.17966 | High_Male - High_Female;<br>Low_Female - High_Female;<br>Low_Male - High_Female;<br>Medium_Female - High_Female;<br>Medium_Male - High_Female;<br>High_Male - Low_Female;<br>High_Male - Low_Male;<br>High_Male - Medium_Female;<br>High_Male - Medium_Male;<br>Low_Male - Low_Female;<br>Medium_Female - Low_Female;<br>Medium_Male - Low_Female;<br>Low_Male - Medium_Female;<br>Medium_Male - Low_Male;<br>Medium_Male - Medium_Female | A_23_P250302 | NM_001837 | NM_001837 |
| 140 | LTC4S | leukotriene C4 synthase          | 3.8276 | 0.0050824 | 2.2939 | 0.18083 | High_Male - High_Female;<br>High_Female - Low_Female;<br>Low_Male - High_Female;<br>Medium_Female - High_Female;<br>Medium_Male - High_Female;<br>High_Male - Low_Female;<br>High_Male - Low_Male;<br>High_Male - Medium_Female;<br>Medium_Male - High_Male;<br>Low_Male - Low_Female;<br>Medium_Female - Low_Female;<br>Medium_Male - Low_Female;<br>Low_Male - Medium_Female;<br>Medium_Male - Low_Male;<br>Medium_Male - Medium_Female | A_24_P397294 | NM_145867 | NM_145867 |

|     |        |                                                                  |        |           |        |         |                                                                                                                                                                                                                                                                                                                                                                                                                                           |               |           |           |
|-----|--------|------------------------------------------------------------------|--------|-----------|--------|---------|-------------------------------------------------------------------------------------------------------------------------------------------------------------------------------------------------------------------------------------------------------------------------------------------------------------------------------------------------------------------------------------------------------------------------------------------|---------------|-----------|-----------|
| 141 | PMP22  | peripheral myelin protein 22                                     | 3.8254 | 0.0051006 | 2.2924 | 0.18083 | High_Male - High_Female;<br>Low_Female - High_Female;<br>Low_Male - High_Female;<br>Medium_Female - High_Female;<br>Medium_Male - High_Female;<br>High_Male - Low_Female;<br>High_Male - Low_Male;<br>High_Male - Medium_Female;<br>High_Male - Medium_Male;<br>Low_Male - Low_Female;<br>Medium_Female - Low_Female;<br>Medium_Male - Low_Female;<br>Medium_Female - Low_Male;<br>Medium_Male - Low_Male;<br>Medium_Male - Medium_Female | A_23_P100711  | NM_000304 | NM_000304 |
| 142 | KCNJ15 | potassium inwardly-rectifying channel,<br>subfamily J, member 15 | 3.8091 | 0.0052328 | 2.2813 | 0.18302 | High_Female - High_Male;<br>High_Female - Low_Female;<br>High_Female - Low_Male;<br>High_Female - Medium_Female;<br>High_Female - Medium_Male;<br>Low_Female - High_Male;<br>High_Male - Low_Male;<br>Medium_Female - High_Male;<br>High_Male - Medium_Male;<br>Low_Female - Low_Male;<br>Medium_Female - Low_Female;<br>Low_Female - Medium_Male;<br>Medium_Female - Low_Male;<br>Medium_Male - Low_Male;<br>Medium_Female - Medium_Male | A_33_P3376140 | NM_170736 | NM_170736 |

|     |             |  |        |           |        |         |                                                                                                                                                                                                                                                                                                                                                                                                                                           |                                             |           |           |
|-----|-------------|--|--------|-----------|--------|---------|-------------------------------------------------------------------------------------------------------------------------------------------------------------------------------------------------------------------------------------------------------------------------------------------------------------------------------------------------------------------------------------------------------------------------------------------|---------------------------------------------|-----------|-----------|
| 143 | XLOC_006338 |  | 3.8084 | 0.005238  | 2.2808 | 0.18302 | High_Female - High_Male;<br>High_Female - Low_Female;<br>High_Female - Low_Male;<br>High_Female - Medium_Female;<br>High_Female - Medium_Male;<br>High_Male - Low_Female;<br>High_Male - Low_Male;<br>High_Male - Medium_Female;<br>Medium_Male - High_Male;<br>Low_Female - Low_Male;<br>Low_Female - Medium_Female;<br>Medium_Male - Low_Female;<br>Medium_Female - Low_Male;<br>Medium_Male - Low_Male;<br>Medium_Male - Medium_Female | linc TCONS_00014249 linc TC<br>ONS_00013675 |           |           |
| 144 | CYP1B1-AS1  |  | 3.8043 | 0.0052721 | 2.278  | 0.18302 | High_Female - High_Male;<br>High_Female - Low_Female;<br>High_Female - Low_Male;<br>High_Female - Medium_Female;<br>High_Female - Medium_Male;<br>High_Male - Low_Female;<br>High_Male - Low_Male;<br>High_Male - Medium_Female;<br>Medium_Male - High_Male;<br>Low_Male - Low_Female;<br>Medium_Female - Low_Female;<br>Medium_Male - Low_Female;<br>Medium_Female - Low_Male;<br>Medium_Male - Low_Male;<br>Medium_Male - Medium_Female | A_19_P00316135                              | NR_027252 | NR_027252 |

|     |                    |  |        |           |        |         |                                                                                                                                                                                                                                                                                                                                                                                                                                           |                        |          |
|-----|--------------------|--|--------|-----------|--------|---------|-------------------------------------------------------------------------------------------------------------------------------------------------------------------------------------------------------------------------------------------------------------------------------------------------------------------------------------------------------------------------------------------------------------------------------------------|------------------------|----------|
| 145 | XLOC_I2_0157<br>52 |  | 3.7944 | 0.005355  | 2.2712 | 0.18462 | High_Male - High_Female;<br>Low_Female - High_Female;<br>Low_Male - High_Female;<br>Medium_Female - High_Female;<br>Medium_Male - High_Female;<br>Low_Female - High_Male;<br>Low_Male - High_Male;<br>High_Male - Medium_Female;<br>High_Male - Medium_Male;<br>Low_Female - Low_Male;<br>Low_Female - Medium_Female;<br>Low_Female - Medium_Male;<br>Low_Male - Medium_Female;<br>Low_Male - Medium_Male;<br>Medium_Female - Medium_Male | linc TCONS_I2_00030522 |          |
| 146 | XLOC_000683        |  | 3.7876 | 0.0054124 | 2.2666 | 0.18532 | High_Female - High_Male;<br>High_Female - Low_Female;<br>High_Female - Low_Male;<br>High_Female - Medium_Female;<br>High_Female - Medium_Male;<br>High_Male - Low_Female;<br>High_Male - Low_Male;<br>High_Male - Medium_Female;<br>Medium_Male - High_Male;<br>Low_Female - Low_Male;<br>Low_Female - Medium_Female;<br>Medium_Male - Low_Female;<br>Medium_Female - Low_Male;<br>Medium_Male - Low_Male;<br>Medium_Male - Medium_Female | A_21_P0001093          | BQ637851 |

|     |       |                                     |        |           |        |         |                                                                                                                                                                                                                                                                                                                                                                                                                                           |              |           |           |
|-----|-------|-------------------------------------|--------|-----------|--------|---------|-------------------------------------------------------------------------------------------------------------------------------------------------------------------------------------------------------------------------------------------------------------------------------------------------------------------------------------------------------------------------------------------------------------------------------------------|--------------|-----------|-----------|
| 147 | OPLAH | 5-oxoprolinase (ATP-hydrolysing)    | 3.7676 | 0.0055854 | 2.2529 | 0.18814 | High_Female - High_Male;<br>High_Female - Low_Female;<br>High_Female - Low_Male;<br>High_Female - Medium_Female;<br>High_Female - Medium_Male;<br>High_Male - Low_Female;<br>High_Male - Low_Male;<br>High_Male - Medium_Female;<br>High_Male - Medium_Male;<br>Low_Female - Low_Male;<br>Medium_Female - Low_Female;<br>Low_Female - Medium_Male;<br>Medium_Female - Low_Male;<br>Medium_Male - Low_Male;<br>Medium_Female - Medium_Male | A_23_P170186 | NM_017570 | NM_017570 |
| 148 | ALAS2 | aminolevulinate, delta-, synthase 2 | 3.7653 | 0.0056058 | 2.2514 | 0.18814 | High_Female - High_Male;<br>High_Female - Low_Female;<br>High_Female - Low_Male;<br>High_Female - Medium_Female;<br>High_Female - Medium_Male;<br>Low_Female - High_Male;<br>High_Male - Low_Male;<br>Medium_Female - High_Male;<br>Medium_Male - High_Male;<br>Low_Female - Low_Male;<br>Medium_Female - Low_Female;<br>Medium_Male - Low_Female;<br>Medium_Female - Low_Male;<br>Medium_Male - Low_Male;<br>Medium_Female - Medium_Male | A_32_P385587 | NM_000032 | NM_000032 |

|     |        |                      |        |           |        |         |                                                                                                                                                                                                                                                                                                                                                                                                                                           |               |              |              |
|-----|--------|----------------------|--------|-----------|--------|---------|-------------------------------------------------------------------------------------------------------------------------------------------------------------------------------------------------------------------------------------------------------------------------------------------------------------------------------------------------------------------------------------------------------------------------------------------|---------------|--------------|--------------|
| 149 | PRSS41 | protease, serine, 41 | 3.7651 | 0.0056078 | 2.2512 | 0.18814 | High_Male - High_Female;<br>High_Female - Low_Female;<br>Low_Male - High_Female;<br>Medium_Female - High_Female;<br>Medium_Male - High_Female;<br>High_Male - Low_Female;<br>High_Male - Low_Male;<br>High_Male - Medium_Female;<br>Medium_Male - High_Male;<br>Low_Male - Low_Female;<br>Medium_Female - Low_Female;<br>Medium_Male - Low_Female;<br>Low_Male - Medium_Female;<br>Medium_Male - Low_Male;<br>Medium_Male - Medium_Female | A_33_P3416634 | NM_001135086 | NM_001135086 |
| 150 | MXI1   | MAX interactor 1     | 3.7556 | 0.005692  | 2.2447 | 0.18824 | High_Female - High_Male;<br>Low_Female - High_Female;<br>Low_Male - High_Female;<br>Medium_Female - High_Female;<br>Medium_Male - High_Female;<br>Low_Female - High_Male;<br>Low_Male - High_Male;<br>Medium_Female - High_Male;<br>Medium_Male - High_Male;<br>Low_Female - Low_Male;<br>Medium_Female - Low_Female;<br>Medium_Male - Low_Female;<br>Medium_Female - Low_Male;<br>Medium_Male - Low_Male;<br>Medium_Female - Medium_Male | A_33_P3383029 | NM_130439    | NM_130439    |

|     |             |                                 |        |           |        |         |                                                                                                                                                                                                                                                                                                                                                                                                                                           |                     |           |           |
|-----|-------------|---------------------------------|--------|-----------|--------|---------|-------------------------------------------------------------------------------------------------------------------------------------------------------------------------------------------------------------------------------------------------------------------------------------------------------------------------------------------------------------------------------------------------------------------------------------------|---------------------|-----------|-----------|
| 151 | TRIB1       | tribbles homolog 1 (Drosophila) | 3.7522 | 0.0057225 | 2.2424 | 0.18824 | High_Male - High_Female;<br>Low_Female - High_Female;<br>Low_Male - High_Female;<br>Medium_Female - High_Female;<br>Medium_Male - High_Female;<br>High_Male - Low_Female;<br>Low_Male - High_Male;<br>High_Male - Medium_Female;<br>High_Male - Medium_Male;<br>Low_Male - Low_Female;<br>Low_Female - Medium_Female;<br>Low_Female - Medium_Male;<br>Low_Male - Medium_Female;<br>Low_Male - Medium_Male;<br>Medium_Male - Medium_Female | A_24_P252497        | NM_025195 | NM_025195 |
| 152 | XLOC_008015 |                                 | 3.7521 | 0.0057235 | 2.2423 | 0.18824 | High_Female - High_Male;<br>High_Female - Low_Female;<br>High_Female - Low_Male;<br>High_Female - Medium_Female;<br>High_Female - Medium_Male;<br>Low_Female - High_Male;<br>High_Male - Low_Male;<br>Medium_Female - High_Male;<br>High_Male - Medium_Male;<br>Low_Female - Low_Male;<br>Medium_Female - Low_Female;<br>Low_Female - Medium_Male;<br>Medium_Female - Low_Male;<br>Low_Male - Medium_Male;<br>Medium_Female - Medium_Male | linc TCONS_00017433 |           |           |



|     |                    |             |        |           |        |         |                                                                                                                                                                                                                                                                                                                                                                                                                                           |               |           |           |
|-----|--------------------|-------------|--------|-----------|--------|---------|-------------------------------------------------------------------------------------------------------------------------------------------------------------------------------------------------------------------------------------------------------------------------------------------------------------------------------------------------------------------------------------------------------------------------------------------|---------------|-----------|-----------|
| 153 | DSP                | desmoplakin | 3.7257 | 0.0059659 | 2.2243 | 0.19492 | High_Male - High_Female;<br>Low_Female - High_Female;<br>Low_Male - High_Female;<br>Medium_Female - High_Female;<br>Medium_Male - High_Female;<br>Low_Female - High_Male;<br>Low_Male - High_Male;<br>Medium_Female - High_Male;<br>Medium_Male - High_Male;<br>Low_Male - Low_Female;<br>Medium_Female - Low_Female;<br>Medium_Male - Low_Female;<br>Medium_Female - Low_Male;<br>Medium_Male - Low_Male;<br>Medium_Male - Medium_Female | A_32_P157945  | NM_004415 | NM_004415 |
| 154 | XLOC_I2_0002<br>53 |             | 3.7072 | 0.0061426 | 2.2116 | 0.198   | High_Male - High_Female;<br>Low_Female - High_Female;<br>Low_Male - High_Female;<br>Medium_Female - High_Female;<br>Medium_Male - High_Female;<br>High_Male - Low_Female;<br>High_Male - Low_Male;<br>High_Male - Medium_Female;<br>High_Male - Medium_Male;<br>Low_Female - Low_Male;<br>Low_Female - Medium_Female;<br>Low_Female - Medium_Male;<br>Medium_Female - Low_Male;<br>Low_Male - Medium_Male;<br>Medium_Female - Medium_Male | A_21_P0010532 |           | BX117229  |

|     |                 |                               |        |           |        |       |                                                                                                                                                                                                                                                                                                                                                                                                                                           |               |              |              |
|-----|-----------------|-------------------------------|--------|-----------|--------|-------|-------------------------------------------------------------------------------------------------------------------------------------------------------------------------------------------------------------------------------------------------------------------------------------------------------------------------------------------------------------------------------------------------------------------------------------------|---------------|--------------|--------------|
| 155 | LIMS3-LOC440895 | LIMS3-LOC440895 readthrough   | 3.7041 | 0.0061728 | 2.2095 | 0.198 | High_Female - High_Male;<br>Low_Female - High_Female;<br>High_Female - Low_Male;<br>High_Female - Medium_Female;<br>High_Female - Medium_Male;<br>Low_Female - High_Male;<br>High_Male - Low_Male;<br>High_Male - Medium_Female;<br>Medium_Male - High_Male;<br>Low_Female - Low_Male;<br>Low_Female - Medium_Female;<br>Low_Female - Medium_Male;<br>Low_Male - Medium_Female;<br>Medium_Male - Low_Male;<br>Medium_Male - Medium_Female | A_21_P0000527 | NR_027145    | NR_027145    |
| 156 | GPR34           | G protein-coupled receptor 34 | 3.6992 | 0.0062206 | 2.2062 | 0.198 | High_Male - High_Female;<br>Low_Female - High_Female;<br>Low_Male - High_Female;<br>Medium_Female - High_Female;<br>Medium_Male - High_Female;<br>High_Male - Low_Female;<br>High_Male - Low_Male;<br>High_Male - Medium_Female;<br>High_Male - Medium_Male;<br>Low_Male - Low_Female;<br>Medium_Female - Low_Female;<br>Medium_Male - Low_Female;<br>Low_Male - Medium_Female;<br>Medium_Male - Low_Male;<br>Medium_Male - Medium_Female | A_23_P11201   | NM_001097579 | NM_001097579 |

|     |       |                                |        |           |        |       |                                                                                                                                                                                                                                                                                                                                                                                                                                           |              |           |           |
|-----|-------|--------------------------------|--------|-----------|--------|-------|-------------------------------------------------------------------------------------------------------------------------------------------------------------------------------------------------------------------------------------------------------------------------------------------------------------------------------------------------------------------------------------------------------------------------------------------|--------------|-----------|-----------|
| 157 | PSPH  | phosphoserine phosphatase      | 3.6957 | 0.0062546 | 2.2038 | 0.198 | High_Male - High_Female;<br>High_Female - Low_Female;<br>High_Female - Low_Male;<br>Medium_Female - High_Female;<br>Medium_Male - High_Female;<br>High_Male - Low_Female;<br>High_Male - Low_Male;<br>Medium_Female - High_Male;<br>Medium_Male - High_Male;<br>Low_Male - Low_Female;<br>Medium_Female - Low_Female;<br>Medium_Male - Low_Female;<br>Medium_Female - Low_Male;<br>Medium_Male - Low_Male;<br>Medium_Female - Medium_Male | A_32_P78816  | NM_004577 | NM_004577 |
| 158 | DUSP1 | dual specificity phosphatase 1 | 3.6954 | 0.0062581 | 2.2036 | 0.198 | High_Female - High_Male;<br>Low_Female - High_Female;<br>Low_Male - High_Female;<br>Medium_Female - High_Female;<br>Medium_Male - High_Female;<br>Low_Female - High_Male;<br>Low_Male - High_Male;<br>Medium_Female - High_Male;<br>Medium_Male - High_Male;<br>Low_Male - Low_Female;<br>Low_Female - Medium_Female;<br>Low_Female - Medium_Male;<br>Low_Male - Medium_Female;<br>Low_Male - Medium_Male;<br>Medium_Female - Medium_Male | A_23_P110712 | NM_004417 | NM_004417 |

|     |         |                                                                                |        |           |        |         |                                                                                                                                                                                                                                                                                                                                                                                                                                           |                     |           |           |
|-----|---------|--------------------------------------------------------------------------------|--------|-----------|--------|---------|-------------------------------------------------------------------------------------------------------------------------------------------------------------------------------------------------------------------------------------------------------------------------------------------------------------------------------------------------------------------------------------------------------------------------------------------|---------------------|-----------|-----------|
| 159 | TPTE2P6 | transmembrane phosphoinositide 3-phosphatase and tensin homolog 2 pseudogene 6 | 3.6827 | 0.006385  | 2.1948 | 0.20028 | High_Male - High_Female;<br>Low_Female - High_Female;<br>Low_Male - High_Female;<br>Medium_Female - High_Female;<br>High_Female - Medium_Male;<br>Low_Female - High_Male;<br>High_Male - Low_Male;<br>High_Male - Medium_Female;<br>High_Male - Medium_Male;<br>Low_Female - Low_Male;<br>Low_Female - Medium_Female;<br>Low_Female - Medium_Male;<br>Medium_Female - Low_Male;<br>Low_Male - Medium_Male;<br>Medium_Female - Medium_Male | A_32_P89827         | NR_002815 | NR_002815 |
| 160 |         |                                                                                | 3.6801 | 0.0064104 | 2.1931 | 0.20028 | High_Male - High_Female;<br>Low_Female - High_Female;<br>Low_Male - High_Female;<br>Medium_Female - High_Female;<br>Medium_Male - High_Female;<br>Low_Female - High_Male;<br>Low_Male - High_Male;<br>High_Male - Medium_Female;<br>High_Male - Medium_Male;<br>Low_Male - Low_Female;<br>Low_Female - Medium_Female;<br>Low_Female - Medium_Male;<br>Low_Male - Medium_Female;<br>Low_Male - Medium_Male;<br>Medium_Female - Medium_Male | ens ENST00000433238 |           |           |

|     |                  |  |        |           |        |         |                                                                                                                                                                                                                                                                                                                                                                                                                                           |               |           |           |
|-----|------------------|--|--------|-----------|--------|---------|-------------------------------------------------------------------------------------------------------------------------------------------------------------------------------------------------------------------------------------------------------------------------------------------------------------------------------------------------------------------------------------------------------------------------------------------|---------------|-----------|-----------|
| 161 |                  |  | 3.6762 | 0.0064507 | 2.1904 | 0.20029 | High_Female - High_Male;<br>High_Female - Low_Female;<br>High_Female - Low_Male;<br>Medium_Female - High_Female;<br>High_Female - Medium_Male;<br>Low_Female - High_Male;<br>Low_Male - High_Male;<br>Medium_Female - High_Male;<br>High_Male - Medium_Male;<br>Low_Male - Low_Female;<br>Medium_Female - Low_Female;<br>Low_Female - Medium_Male;<br>Medium_Female - Low_Male;<br>Low_Male - Medium_Male;<br>Medium_Female - Medium_Male | A_33_P3399755 |           |           |
| 162 | LOC10050689<br>7 |  | 3.6569 | 0.0066502 | 2.1772 | 0.20449 | High_Male - High_Female;<br>Low_Female - High_Female;<br>Low_Male - High_Female;<br>Medium_Female - High_Female;<br>Medium_Male - High_Female;<br>High_Male - Low_Female;<br>High_Male - Low_Male;<br>High_Male - Medium_Female;<br>Medium_Male - High_Male;<br>Low_Female - Low_Male;<br>Low_Female - Medium_Female;<br>Medium_Male - Low_Female;<br>Low_Male - Medium_Female;<br>Medium_Male - Low_Male;<br>Medium_Male - Medium_Female | A_21_P0014234 | XR_133523 | XR_133523 |

|     |             |  |        |           |        |         |                                                                                                                                                                                                                                                                                                                                                                                                                                           |               |          |
|-----|-------------|--|--------|-----------|--------|---------|-------------------------------------------------------------------------------------------------------------------------------------------------------------------------------------------------------------------------------------------------------------------------------------------------------------------------------------------------------------------------------------------------------------------------------------------|---------------|----------|
| 163 | XLOC_003650 |  | 3.6514 | 0.0067084 | 2.1734 | 0.20449 | High_Male - High_Female;<br>Low_Female - High_Female;<br>Low_Male - High_Female;<br>Medium_Female - High_Female;<br>High_Female - Medium_Male;<br>Low_Female - High_Male;<br>High_Male - Low_Male;<br>High_Male - Medium_Female;<br>High_Male - Medium_Male;<br>Low_Female - Low_Male;<br>Low_Female - Medium_Female;<br>Low_Female - Medium_Male;<br>Low_Male - Medium_Female;<br>Low_Male - Medium_Male;<br>Medium_Female - Medium_Male | A_21_P0003848 | CR742343 |
| 164 | XLOC_011248 |  | 3.6513 | 0.0067086 | 2.1734 | 0.20449 | High_Female - High_Male;<br>Low_Female - High_Female;<br>Low_Male - High_Female;<br>Medium_Female - High_Female;<br>Medium_Male - High_Female;<br>Low_Female - High_Male;<br>Low_Male - High_Male;<br>Medium_Female - High_Male;<br>Medium_Male - High_Male;<br>Low_Male - Low_Female;<br>Medium_Female - Low_Female;<br>Medium_Male - Low_Female;<br>Low_Male - Medium_Female;<br>Low_Male - Medium_Male;<br>Medium_Female - Medium_Male | A_21_P0008570 | BC035091 |

|     |            |                                                |        |           |        |        |                                                                                                                                                                                                                                                                                                                                                                                                                                           |               |              |              |
|-----|------------|------------------------------------------------|--------|-----------|--------|--------|-------------------------------------------------------------------------------------------------------------------------------------------------------------------------------------------------------------------------------------------------------------------------------------------------------------------------------------------------------------------------------------------------------------------------------------------|---------------|--------------|--------------|
| 165 | LINC00230A | long intergenic non-protein coding RNA<br>230A | 3.6343 | 0.0068914 | 2.1617 | 0.2066 | High_Male - High_Female;<br>Low_Female - High_Female;<br>Low_Male - High_Female;<br>Medium_Female - High_Female;<br>Medium_Male - High_Female;<br>Low_Female - High_Male;<br>Low_Male - High_Male;<br>Medium_Female - High_Male;<br>Medium_Male - High_Male;<br>Low_Male - Low_Female;<br>Low_Female - Medium_Female;<br>Medium_Male - Low_Female;<br>Low_Male - Medium_Female;<br>Medium_Male - Low_Male;<br>Medium_Male - Medium_Female | A_33_P3308232 | NR_002161    | NR_002161    |
| 166 | RFPL4A     | ret finger protein-like 4A                     | 3.6322 | 0.006914  | 2.1603 | 0.2066 | High_Female - High_Male;<br>Low_Female - High_Female;<br>High_Female - Low_Male;<br>High_Female - Medium_Female;<br>Medium_Male - High_Female;<br>Low_Female - High_Male;<br>Low_Male - High_Male;<br>Medium_Female - High_Male;<br>Medium_Male - High_Male;<br>Low_Female - Low_Male;<br>Low_Female - Medium_Female;<br>Medium_Male - Low_Female;<br>Medium_Female - Low_Male;<br>Medium_Male - Low_Male;<br>Medium_Male - Medium_Female | A_33_P3366127 | NM_001145014 | NM_001145014 |

|     |       |            |        |           |        |        |                                                                                                                                                                                                                                                                                                                                                                                                                                           |               |           |           |
|-----|-------|------------|--------|-----------|--------|--------|-------------------------------------------------------------------------------------------------------------------------------------------------------------------------------------------------------------------------------------------------------------------------------------------------------------------------------------------------------------------------------------------------------------------------------------------|---------------|-----------|-----------|
| 167 | ANXA3 | annexin A3 | 3.6309 | 0.0069288 | 2.1593 | 0.2066 | High_Female - High_Male;<br>High_Female - Low_Female;<br>High_Female - Low_Male;<br>High_Female - Medium_Female;<br>High_Female - Medium_Male;<br>Low_Female - High_Male;<br>High_Male - Low_Male;<br>Medium_Female - High_Male;<br>High_Male - Medium_Male;<br>Low_Female - Low_Male;<br>Low_Female - Medium_Female;<br>Low_Female - Medium_Male;<br>Medium_Female - Low_Male;<br>Medium_Male - Low_Male;<br>Medium_Female - Medium_Male | A_23_P121716  | NM_005139 | NM_005139 |
| 168 |       |            | 3.6296 | 0.0069431 | 2.1584 | 0.2066 | High_Female - High_Male;<br>High_Female - Low_Female;<br>High_Female - Low_Male;<br>Medium_Female - High_Female;<br>High_Female - Medium_Male;<br>Low_Female - High_Male;<br>Low_Male - High_Male;<br>Medium_Female - High_Male;<br>Medium_Male - High_Male;<br>Low_Male - Low_Female;<br>Medium_Female - Low_Female;<br>Low_Female - Medium_Male;<br>Medium_Female - Low_Male;<br>Low_Male - Medium_Male;<br>Medium_Female - Medium_Male | A_33_P3422712 |           |           |



|     |                    |                              |        |           |        |         |                                                                                                                                                                                                                                                                                                                                                                                                                                           |                        |           |           |
|-----|--------------------|------------------------------|--------|-----------|--------|---------|-------------------------------------------------------------------------------------------------------------------------------------------------------------------------------------------------------------------------------------------------------------------------------------------------------------------------------------------------------------------------------------------------------------------------------------------|------------------------|-----------|-----------|
| 169 | XLOC_I2_0045<br>46 |                              | 3.5933 | 0.0073535 | 2.1335 | 0.21751 | High_Male - High_Female;<br>Low_Female - High_Female;<br>Low_Male - High_Female;<br>Medium_Female - High_Female;<br>Medium_Male - High_Female;<br>High_Male - Low_Female;<br>Low_Male - High_Male;<br>Medium_Female - High_Male;<br>High_Male - Medium_Male;<br>Low_Male - Low_Female;<br>Medium_Female - Low_Female;<br>Low_Female - Medium_Male;<br>Low_Male - Medium_Female;<br>Low_Male - Medium_Male;<br>Medium_Female - Medium_Male | linc TCONS_I2_00008281 |           |           |
| 170 | LOC10013151<br>0   | uncharacterized LOC100131510 | 3.5881 | 0.0074136 | 2.13   | 0.21778 | High_Male - High_Female;<br>Low_Female - High_Female;<br>High_Female - Low_Male;<br>High_Female - Medium_Female;<br>High_Female - Medium_Male;<br>Low_Female - High_Male;<br>High_Male - Low_Male;<br>High_Male - Medium_Female;<br>High_Male - Medium_Male;<br>Low_Female - Low_Male;<br>Low_Female - Medium_Female;<br>Low_Female - Medium_Male;<br>Medium_Female - Low_Male;<br>Low_Male - Medium_Male;<br>Medium_Female - Medium_Male | A_24_P323754           | XR_109960 | XR_109960 |

|     |       |                                 |        |           |        |         |                                                                                                                                                                                                                                                                                                                                                                                                                                           |               |           |           |
|-----|-------|---------------------------------|--------|-----------|--------|---------|-------------------------------------------------------------------------------------------------------------------------------------------------------------------------------------------------------------------------------------------------------------------------------------------------------------------------------------------------------------------------------------------------------------------------------------------|---------------|-----------|-----------|
| 171 | BACE2 | beta-site APP-cleaving enzyme 2 | 3.5787 | 0.0075249 | 2.1235 | 0.21778 | High_Male - High_Female;<br>Low_Female - High_Female;<br>Low_Male - High_Female;<br>Medium_Female - High_Female;<br>Medium_Male - High_Female;<br>High_Male - Low_Female;<br>High_Male - Low_Male;<br>High_Male - Medium_Female;<br>Medium_Male - High_Male;<br>Low_Male - Low_Female;<br>Medium_Female - Low_Female;<br>Medium_Male - Low_Female;<br>Low_Male - Medium_Female;<br>Medium_Male - Low_Male;<br>Medium_Male - Medium_Female | A_23_P154875  | NM_012105 | NM_012105 |
| 172 |       |                                 | 3.578  | 0.0075328 | 2.123  | 0.21778 | High_Female - High_Male;<br>Low_Female - High_Female;<br>High_Female - Low_Male;<br>Medium_Female - High_Female;<br>High_Female - Medium_Male;<br>Low_Female - High_Male;<br>High_Male - Low_Male;<br>Medium_Female - High_Male;<br>High_Male - Medium_Male;<br>Low_Female - Low_Male;<br>Medium_Female - Low_Female;<br>Low_Female - Medium_Male;<br>Medium_Female - Low_Male;<br>Medium_Male - Low_Male;<br>Medium_Female - Medium_Male | A_33_P3387016 |           |           |

|     |        |                                                          |        |           |        |         |                                                                                                                                                                                                                                                                                                                                                                                                                                           |               |              |              |
|-----|--------|----------------------------------------------------------|--------|-----------|--------|---------|-------------------------------------------------------------------------------------------------------------------------------------------------------------------------------------------------------------------------------------------------------------------------------------------------------------------------------------------------------------------------------------------------------------------------------------------|---------------|--------------|--------------|
| 173 | CRABP2 | cellular retinoic acid binding protein 2                 | 3.5777 | 0.0075366 | 2.1228 | 0.21778 | High_Male - High_Female;<br>Low_Female - High_Female;<br>Low_Male - High_Female;<br>Medium_Female - High_Female;<br>Medium_Male - High_Female;<br>Low_Female - High_Male;<br>High_Male - Low_Male;<br>Medium_Female - High_Male;<br>High_Male - Medium_Male;<br>Low_Female - Low_Male;<br>Low_Female - Medium_Female;<br>Low_Female - Medium_Male;<br>Medium_Female - Low_Male;<br>Low_Male - Medium_Male;<br>Medium_Female - Medium_Male | A_33_P3294826 | NM_001199723 | NM_001199723 |
| 174 | TSIX   | TSIX transcript, XIST antisense RNA (non-protein coding) | 3.5722 | 0.0076031 | 2.119  | 0.21843 | High_Female - High_Male;<br>High_Female - Low_Female;<br>High_Female - Low_Male;<br>High_Female - Medium_Female;<br>High_Female - Medium_Male;<br>Low_Female - High_Male;<br>High_Male - Low_Male;<br>Medium_Female - High_Male;<br>High_Male - Medium_Male;<br>Low_Female - Low_Male;<br>Low_Female - Medium_Female;<br>Low_Female - Medium_Male;<br>Medium_Female - Low_Male;<br>Medium_Male - Low_Male;<br>Medium_Female - Medium_Male | A_33_P3405911 | NR_003255    | NR_003255    |

|     |             |                                   |        |           |        |         |                                                                                                                                                                                                                                                                                                                                                                                                                                           |                     |           |           |
|-----|-------------|-----------------------------------|--------|-----------|--------|---------|-------------------------------------------------------------------------------------------------------------------------------------------------------------------------------------------------------------------------------------------------------------------------------------------------------------------------------------------------------------------------------------------------------------------------------------------|---------------------|-----------|-----------|
| 175 | XLOC_010052 |                                   | 3.5613 | 0.007735  | 2.1115 | 0.22028 | High_Male - High_Female;<br>Low_Female - High_Female;<br>High_Female - Low_Male;<br>High_Female - Medium_Female;<br>Medium_Male - High_Female;<br>Low_Female - High_Male;<br>High_Male - Low_Male;<br>High_Male - Medium_Female;<br>High_Male - Medium_Male;<br>Low_Female - Low_Male;<br>Low_Female - Medium_Female;<br>Low_Female - Medium_Male;<br>Medium_Female - Low_Male;<br>Medium_Male - Low_Male;<br>Medium_Male - Medium_Female | linc TCONS_00020761 |           |           |
| 176 | SNAR-G2     | small ILF3/NF90-associated RNA G2 | 3.5576 | 0.0077807 | 2.109  | 0.22028 | High_Female - High_Male;<br>High_Female - Low_Female;<br>High_Female - Low_Male;<br>High_Female - Medium_Female;<br>High_Female - Medium_Male;<br>Low_Female - High_Male;<br>High_Male - Low_Male;<br>Medium_Female - High_Male;<br>Medium_Male - High_Male;<br>Low_Female - Low_Male;<br>Medium_Female - Low_Female;<br>Medium_Male - Low_Female;<br>Medium_Female - Low_Male;<br>Medium_Male - Low_Male;<br>Medium_Female - Medium_Male | A_21_P0000509       | NR_024244 | NR_024244 |

|     |             |                  |        |           |        |         |                                                                                                                                                                                                                                                                                                                                                                                                                                           |               |          |
|-----|-------------|------------------|--------|-----------|--------|---------|-------------------------------------------------------------------------------------------------------------------------------------------------------------------------------------------------------------------------------------------------------------------------------------------------------------------------------------------------------------------------------------------------------------------------------------------|---------------|----------|
| 177 | XLOC_014215 |                  | 3.5547 | 0.0078162 | 2.107  | 0.22028 | High_Male - High_Female;<br>Low_Female - High_Female;<br>Low_Male - High_Female;<br>Medium_Female - High_Female;<br>Medium_Male - High_Female;<br>Low_Female - High_Male;<br>High_Male - Low_Male;<br>High_Male - Medium_Female;<br>High_Male - Medium_Male;<br>Low_Female - Low_Male;<br>Low_Female - Medium_Female;<br>Low_Female - Medium_Male;<br>Low_Male - Medium_Female;<br>Low_Male - Medium_Male;<br>Medium_Female - Medium_Male | A_21_P0010355 | DB089380 |
| 178 | THBS3       | thrombospondin 3 | 3.5525 | 0.0078437 | 2.1055 | 0.22028 | High_Male - High_Female;<br>High_Female - Low_Female;<br>High_Female - Low_Male;<br>Medium_Female - High_Female;<br>High_Female - Medium_Male;<br>High_Male - Low_Female;<br>High_Male - Low_Male;<br>High_Male - Medium_Female;<br>High_Male - Medium_Male;<br>Low_Female - Low_Male;<br>Medium_Female - Low_Female;<br>Medium_Male - Low_Female;<br>Medium_Female - Low_Male;<br>Medium_Male - Low_Male;<br>Medium_Female - Medium_Male | A_33_P3222867 | CR933610 |

|     |                    |                                    |        |           |        |         |                                                                                                                                                                                                                                                                                                                                                                                                                                           |               |              |              |
|-----|--------------------|------------------------------------|--------|-----------|--------|---------|-------------------------------------------------------------------------------------------------------------------------------------------------------------------------------------------------------------------------------------------------------------------------------------------------------------------------------------------------------------------------------------------------------------------------------------------|---------------|--------------|--------------|
| 179 | XLOC_I2_0158<br>49 |                                    | 3.5476 | 0.0079044 | 2.1021 | 0.22075 | High_Female - High_Male;<br>Low_Female - High_Female;<br>Low_Male - High_Female;<br>High_Female - Medium_Female;<br>Medium_Male - High_Female;<br>Low_Female - High_Male;<br>Low_Male - High_Male;<br>Medium_Female - High_Male;<br>Medium_Male - High_Male;<br>Low_Male - Low_Female;<br>Low_Female - Medium_Female;<br>Medium_Male - Low_Female;<br>Low_Male - Medium_Female;<br>Low_Male - Medium_Male;<br>Medium_Male - Medium_Female | A_21_P0013836 |              | BX111592     |
| 180 | TTC24              | tetratricopeptide repeat domain 24 | 3.5437 | 0.0079533 | 2.0995 | 0.22088 | High_Male - High_Female;<br>Low_Female - High_Female;<br>Low_Male - High_Female;<br>Medium_Female - High_Female;<br>High_Female - Medium_Male;<br>Low_Female - High_Male;<br>High_Male - Low_Male;<br>Medium_Female - High_Male;<br>High_Male - Medium_Male;<br>Low_Female - Low_Male;<br>Low_Female - Medium_Female;<br>Low_Female - Medium_Male;<br>Medium_Female - Low_Male;<br>Low_Male - Medium_Male;<br>Medium_Female - Medium_Male | A_33_P3297345 | NM_001105669 | NM_001105669 |

|     |        |                                                  |        |           |        |         |                                                                                                                                                                                                                                                                                                                                                                                                                                           |              |           |           |
|-----|--------|--------------------------------------------------|--------|-----------|--------|---------|-------------------------------------------------------------------------------------------------------------------------------------------------------------------------------------------------------------------------------------------------------------------------------------------------------------------------------------------------------------------------------------------------------------------------------------------|--------------|-----------|-----------|
| 181 | ALOX15 | arachidonate 15-lipoxygenase                     | 3.5281 | 0.0081528 | 2.0887 | 0.22517 | High_Male - High_Female;<br>Low_Female - High_Female;<br>Low_Male - High_Female;<br>Medium_Female - High_Female;<br>Medium_Male - High_Female;<br>High_Male - Low_Female;<br>High_Male - Low_Male;<br>High_Male - Medium_Female;<br>Medium_Male - High_Male;<br>Low_Male - Low_Female;<br>Medium_Female - Low_Female;<br>Medium_Male - Low_Female;<br>Low_Male - Medium_Female;<br>Medium_Male - Low_Male;<br>Medium_Male - Medium_Female | A_23_P55373  | NM_001140 | NM_001140 |
| 182 | ABTB2  | ankyrin repeat and BTB (POZ) domain containing 2 | 3.5093 | 0.0084001 | 2.0757 | 0.23073 | High_Male - High_Female;<br>Low_Female - High_Female;<br>Low_Male - High_Female;<br>Medium_Female - High_Female;<br>Medium_Male - High_Female;<br>High_Male - Low_Female;<br>High_Male - Low_Male;<br>High_Male - Medium_Female;<br>High_Male - Medium_Male;<br>Low_Male - Low_Female;<br>Medium_Female - Low_Female;<br>Medium_Male - Low_Female;<br>Low_Male - Medium_Female;<br>Medium_Male - Low_Male;<br>Medium_Male - Medium_Female | A_23_P356616 | NM_145804 | NM_145804 |

|     |             |                                   |        |           |        |         |                                                                                                                                                                                                                                                                                                                                                                                                                                           |                |  |          |
|-----|-------------|-----------------------------------|--------|-----------|--------|---------|-------------------------------------------------------------------------------------------------------------------------------------------------------------------------------------------------------------------------------------------------------------------------------------------------------------------------------------------------------------------------------------------------------------------------------------------|----------------|--|----------|
| 183 | XLOC_007052 |                                   | 3.5039 | 0.0084721 | 2.072  | 0.23113 | High_Female - High_Male;<br>High_Female - Low_Female;<br>Low_Male - High_Female;<br>Medium_Female - High_Female;<br>High_Female - Medium_Male;<br>Low_Female - High_Male;<br>Low_Male - High_Male;<br>Medium_Female - High_Male;<br>High_Male - Medium_Male;<br>Low_Male - Low_Female;<br>Medium_Female - Low_Female;<br>Low_Female - Medium_Male;<br>Medium_Female - Low_Male;<br>Low_Male - Medium_Male;<br>Medium_Female - Medium_Male | A_19_P00316401 |  | BX500531 |
| 184 | RAB44       | RAB44, member RAS oncogene family | 3.4992 | 0.0085356 | 2.0688 | 0.23113 | High_Male - High_Female;<br>Low_Female - High_Female;<br>Low_Male - High_Female;<br>Medium_Female - High_Female;<br>Medium_Male - High_Female;<br>High_Male - Low_Female;<br>High_Male - Low_Male;<br>High_Male - Medium_Female;<br>Medium_Male - High_Male;<br>Low_Male - Low_Female;<br>Medium_Female - Low_Female;<br>Medium_Male - Low_Female;<br>Low_Male - Medium_Female;<br>Medium_Male - Low_Male;<br>Medium_Male - Medium_Female | A_21_P0013023  |  | AK125083 |



|     |           |                           |        |           |        |         |                                                                                                                                                                                                                                                                                                                                                                                                                                           |               |          |
|-----|-----------|---------------------------|--------|-----------|--------|---------|-------------------------------------------------------------------------------------------------------------------------------------------------------------------------------------------------------------------------------------------------------------------------------------------------------------------------------------------------------------------------------------------------------------------------------------------|---------------|----------|
| 185 |           |                           | 3.4978 | 0.0085536 | 2.0678 | 0.23113 | High_Male - High_Female;<br>Low_Female - High_Female;<br>Low_Male - High_Female;<br>Medium_Female - High_Female;<br>Medium_Male - High_Female;<br>Low_Female - High_Male;<br>Low_Male - High_Male;<br>High_Male - Medium_Female;<br>High_Male - Medium_Male;<br>Low_Female - Low_Male;<br>Low_Female - Medium_Female;<br>Low_Female - Medium_Male;<br>Low_Male - Medium_Female;<br>Low_Male - Medium_Male;<br>Medium_Female - Medium_Male | A_33_P3691615 | AK094945 |
| 186 | LOC286058 | uncharacterized LOC286058 | 3.4883 | 0.0086848 | 2.0612 | 0.23217 | High_Male - High_Female;<br>Low_Female - High_Female;<br>Low_Male - High_Female;<br>Medium_Female - High_Female;<br>Medium_Male - High_Female;<br>High_Male - Low_Female;<br>Low_Male - High_Male;<br>High_Male - Medium_Female;<br>High_Male - Medium_Male;<br>Low_Male - Low_Female;<br>Low_Female - Medium_Female;<br>Low_Female - Medium_Male;<br>Low_Male - Medium_Female;<br>Low_Male - Medium_Male;<br>Medium_Male - Medium_Female | A_33_P3630780 | AL833160 |

|     |          |                                    |        |           |        |         |                                                                                                                                                                                                                                                                                                                                                                                                                                           |               |           |           |
|-----|----------|------------------------------------|--------|-----------|--------|---------|-------------------------------------------------------------------------------------------------------------------------------------------------------------------------------------------------------------------------------------------------------------------------------------------------------------------------------------------------------------------------------------------------------------------------------------------|---------------|-----------|-----------|
| 187 | FCRL2    | Fc receptor-like 2                 | 3.4872 | 0.0086997 | 2.0605 | 0.23217 | High_Female - High_Male;<br>Low_Female - High_Female;<br>Low_Male - High_Female;<br>Medium_Female - High_Female;<br>Medium_Male - High_Female;<br>Low_Female - High_Male;<br>Low_Male - High_Male;<br>Medium_Female - High_Male;<br>Medium_Male - High_Male;<br>Low_Male - Low_Female;<br>Low_Female - Medium_Female;<br>Medium_Male - Low_Female;<br>Low_Male - Medium_Female;<br>Low_Male - Medium_Male;<br>Medium_Male - Medium_Female | A_24_P319647  | NM_030764 | NM_030764 |
| 188 | CCDC144A | coiled-coil domain containing 144A | 3.4785 | 0.0088207 | 2.0545 | 0.23217 | High_Female - High_Male;<br>Low_Female - High_Female;<br>Low_Male - High_Female;<br>Medium_Female - High_Female;<br>Medium_Male - High_Female;<br>Low_Female - High_Male;<br>Low_Male - High_Male;<br>Medium_Female - High_Male;<br>Medium_Male - High_Male;<br>Low_Male - Low_Female;<br>Medium_Female - Low_Female;<br>Medium_Male - Low_Female;<br>Low_Male - Medium_Female;<br>Low_Male - Medium_Male;<br>Medium_Male - Medium_Female | A_21_P0011527 | NM_014695 | NM_014695 |

|     |       |                                                                               |       |           |        |         |                                                                                                                                                                                                                                                                                                                                                                                                                                           |               |           |           |
|-----|-------|-------------------------------------------------------------------------------|-------|-----------|--------|---------|-------------------------------------------------------------------------------------------------------------------------------------------------------------------------------------------------------------------------------------------------------------------------------------------------------------------------------------------------------------------------------------------------------------------------------------------|---------------|-----------|-----------|
| 189 |       |                                                                               | 3.474 | 0.0088835 | 2.0514 | 0.23217 | High_Male - High_Female;<br>Low_Female - High_Female;<br>Low_Male - High_Female;<br>Medium_Female - High_Female;<br>Medium_Male - High_Female;<br>Low_Female - High_Male;<br>High_Male - Low_Male;<br>High_Male - Medium_Female;<br>High_Male - Medium_Male;<br>Low_Female - Low_Male;<br>Low_Female - Medium_Female;<br>Low_Female - Medium_Male;<br>Low_Male - Medium_Female;<br>Low_Male - Medium_Male;<br>Medium_Female - Medium_Male | A_33_P3325102 |           | CR604878  |
| 190 | EMR4P | egf-like module containing, mucin-like,<br>hormone receptor-like 4 pseudogene | 3.473 | 0.0088974 | 2.0507 | 0.23217 | High_Male - High_Female;<br>Low_Female - High_Female;<br>Low_Male - High_Female;<br>Medium_Female - High_Female;<br>Medium_Male - High_Female;<br>High_Male - Low_Female;<br>High_Male - Low_Male;<br>High_Male - Medium_Female;<br>Medium_Male - High_Male;<br>Low_Male - Low_Female;<br>Medium_Female - Low_Female;<br>Medium_Male - Low_Female;<br>Low_Male - Medium_Female;<br>Medium_Male - Low_Male;<br>Medium_Male - Medium_Female | A_33_P3247320 | NR_024075 | NR_024075 |

|     |             |                                     |        |           |        |         |                                                                                                                                                                                                                                                                                                                                                                                                                                           |               |           |           |
|-----|-------------|-------------------------------------|--------|-----------|--------|---------|-------------------------------------------------------------------------------------------------------------------------------------------------------------------------------------------------------------------------------------------------------------------------------------------------------------------------------------------------------------------------------------------------------------------------------------------|---------------|-----------|-----------|
| 191 | PGLYRP1     | peptidoglycan recognition protein 1 | 3.4717 | 0.0089167 | 2.0498 | 0.23217 | High_Male - High_Female;<br>High_Female - Low_Female;<br>High_Female - Low_Male;<br>High_Female - Medium_Female;<br>Medium_Male - High_Female;<br>High_Male - Low_Female;<br>High_Male - Low_Male;<br>High_Male - Medium_Female;<br>High_Male - Medium_Male;<br>Low_Female - Low_Male;<br>Medium_Female - Low_Female;<br>Medium_Male - Low_Female;<br>Medium_Female - Low_Male;<br>Medium_Male - Low_Male;<br>Medium_Male - Medium_Female | A_23_P208747  | NM_005091 | NM_005091 |
| 192 | XLOC_012642 |                                     | 3.4716 | 0.0089172 | 2.0498 | 0.23217 | High_Male - High_Female;<br>Low_Female - High_Female;<br>Low_Male - High_Female;<br>Medium_Female - High_Female;<br>Medium_Male - High_Female;<br>High_Male - Low_Female;<br>High_Male - Low_Male;<br>High_Male - Medium_Female;<br>Medium_Male - High_Male;<br>Low_Male - Low_Female;<br>Medium_Female - Low_Female;<br>Medium_Male - Low_Female;<br>Low_Male - Medium_Female;<br>Medium_Male - Low_Male;<br>Medium_Male - Medium_Female | A_21_P0009466 |           | DB516369  |

|     |            |                                        |        |           |        |         |                                                                                                                                                                                                                                                                                                                                                                                                                                           |               |           |           |
|-----|------------|----------------------------------------|--------|-----------|--------|---------|-------------------------------------------------------------------------------------------------------------------------------------------------------------------------------------------------------------------------------------------------------------------------------------------------------------------------------------------------------------------------------------------------------------------------------------------|---------------|-----------|-----------|
| 193 | SCARNA6    | small Cajal body-specific RNA 6        | 3.464  | 0.009026  | 2.0445 | 0.23379 | High_Male - High_Female;<br>Low_Female - High_Female;<br>Low_Male - High_Female;<br>Medium_Female - High_Female;<br>High_Female - Medium_Male;<br>Low_Female - High_Male;<br>High_Male - Low_Male;<br>Medium_Female - High_Male;<br>High_Male - Medium_Male;<br>Low_Female - Low_Male;<br>Medium_Female - Low_Female;<br>Low_Female - Medium_Male;<br>Medium_Female - Low_Male;<br>Low_Male - Medium_Male;<br>Medium_Female - Medium_Male | A_33_P3230837 | NR_003006 | NR_003006 |
| 194 | ANKRD36BP2 | ankyrin repeat domain 36B pseudogene 2 | 3.4585 | 0.0091048 | 2.0407 | 0.23445 | High_Female - High_Male;<br>Low_Female - High_Female;<br>Low_Male - High_Female;<br>Medium_Female - High_Female;<br>High_Female - Medium_Male;<br>Low_Female - High_Male;<br>Low_Male - High_Male;<br>Medium_Female - High_Male;<br>Medium_Male - High_Male;<br>Low_Male - Low_Female;<br>Low_Female - Medium_Female;<br>Low_Female - Medium_Male;<br>Low_Male - Medium_Female;<br>Low_Male - Medium_Male;<br>Medium_Female - Medium_Male | A_24_P341089  | NR_015424 | NR_015424 |

|     |         |                                                  |        |           |        |         |                                                                                                                                                                                                                                                                                                                                                                                                                                           |               |              |              |
|-----|---------|--------------------------------------------------|--------|-----------|--------|---------|-------------------------------------------------------------------------------------------------------------------------------------------------------------------------------------------------------------------------------------------------------------------------------------------------------------------------------------------------------------------------------------------------------------------------------------------|---------------|--------------|--------------|
| 195 | CCDC64B | coiled-coil domain containing 64B                | 3.4537 | 0.0091746 | 2.0374 | 0.23445 | High_Female - High_Male;<br>High_Female - Low_Female;<br>High_Female - Low_Male;<br>High_Female - Medium_Female;<br>High_Female - Medium_Male;<br>High_Male - Low_Female;<br>High_Male - Low_Male;<br>Medium_Female - High_Male;<br>Medium_Male - High_Male;<br>Low_Male - Low_Female;<br>Medium_Female - Low_Female;<br>Medium_Male - Low_Female;<br>Medium_Female - Low_Male;<br>Medium_Male - Low_Male;<br>Medium_Female - Medium_Male | A_33_P3335590 | NM_001103175 | NM_001103175 |
| 196 | GADD45G | growth arrest and DNA-damage-inducible,<br>gamma | 3.4525 | 0.0091922 | 2.0366 | 0.23445 | High_Male - High_Female;<br>High_Female - Low_Female;<br>High_Female - Low_Male;<br>Medium_Female - High_Female;<br>Medium_Male - High_Female;<br>High_Male - Low_Female;<br>High_Male - Low_Male;<br>High_Male - Medium_Female;<br>High_Male - Medium_Male;<br>Low_Female - Low_Male;<br>Medium_Female - Low_Female;<br>Medium_Male - Low_Female;<br>Medium_Female - Low_Male;<br>Medium_Male - Low_Male;<br>Medium_Female - Medium_Male | A_33_P3252394 | NM_006705    | NM_006705    |

|     |        |                                                   |        |           |        |         |                                                                                                                                                                                                                                                                                                                                                                                                                                           |               |           |           |
|-----|--------|---------------------------------------------------|--------|-----------|--------|---------|-------------------------------------------------------------------------------------------------------------------------------------------------------------------------------------------------------------------------------------------------------------------------------------------------------------------------------------------------------------------------------------------------------------------------------------------|---------------|-----------|-----------|
| 197 | P2RY14 | purinergic receptor P2Y, G-protein coupled,<br>14 | 3.445  | 0.0093028 | 2.0314 | 0.23606 | High_Male - High_Female;<br>Low_Female - High_Female;<br>Low_Male - High_Female;<br>Medium_Female - High_Female;<br>Medium_Male - High_Female;<br>High_Male - Low_Female;<br>High_Male - Low_Male;<br>High_Male - Medium_Female;<br>High_Male - Medium_Male;<br>Low_Male - Low_Female;<br>Medium_Female - Low_Female;<br>Medium_Male - Low_Female;<br>Medium_Female - Low_Male;<br>Medium_Male - Low_Male;<br>Medium_Male - Medium_Female | A_24_P165864  | NM_014879 | NM_014879 |
| 198 |        |                                                   | 3.4352 | 0.0094479 | 2.0247 | 0.23854 | High_Female - High_Male;<br>High_Female - Low_Female;<br>High_Female - Low_Male;<br>High_Female - Medium_Female;<br>High_Female - Medium_Male;<br>Low_Female - High_Male;<br>High_Male - Low_Male;<br>Medium_Female - High_Male;<br>Medium_Male - High_Male;<br>Low_Female - Low_Male;<br>Low_Female - Medium_Female;<br>Medium_Male - Low_Female;<br>Medium_Female - Low_Male;<br>Medium_Male - Low_Male;<br>Medium_Male - Medium_Female | A_33_P3364493 |           |           |

|     |           |                                                     |       |           |        |         |                                                                                                                                                                                                                                                                                                                                                                                                                                           |               |              |              |
|-----|-----------|-----------------------------------------------------|-------|-----------|--------|---------|-------------------------------------------------------------------------------------------------------------------------------------------------------------------------------------------------------------------------------------------------------------------------------------------------------------------------------------------------------------------------------------------------------------------------------------------|---------------|--------------|--------------|
| 199 | LOC203274 | uncharacterized LOC203274                           | 3.429 | 0.0095415 | 2.0204 | 0.23964 | High_Female - High_Male;<br>High_Female - Low_Female;<br>High_Female - Low_Male;<br>High_Female - Medium_Female;<br>High_Female - Medium_Male;<br>Low_Female - High_Male;<br>High_Male - Low_Male;<br>Medium_Female - High_Male;<br>Medium_Male - High_Male;<br>Low_Female - Low_Male;<br>Low_Female - Medium_Female;<br>Medium_Male - Low_Female;<br>Medium_Female - Low_Male;<br>Medium_Male - Low_Male;<br>Medium_Male - Medium_Female | A_33_P3474859 |              | BC110369     |
| 200 | OR6T1     | olfactory receptor, family 6, subfamily T, member 1 | 3.423 | 0.009633  | 2.0162 | 0.23964 | High_Male - High_Female;<br>Low_Female - High_Female;<br>High_Female - Low_Male;<br>Medium_Female - High_Female;<br>High_Female - Medium_Male;<br>High_Male - Low_Female;<br>High_Male - Low_Male;<br>High_Male - Medium_Female;<br>High_Male - Medium_Male;<br>Low_Female - Low_Male;<br>Low_Female - Medium_Female;<br>Low_Female - Medium_Male;<br>Medium_Female - Low_Male;<br>Medium_Male - Low_Male;<br>Medium_Female - Medium_Male | A_33_P3342469 | NM_001005187 | NM_001005187 |



|     |        |                               |        |           |        |         |                                                                                                                                                                                                                                                                                                                                                                                                                                           |               |           |           |
|-----|--------|-------------------------------|--------|-----------|--------|---------|-------------------------------------------------------------------------------------------------------------------------------------------------------------------------------------------------------------------------------------------------------------------------------------------------------------------------------------------------------------------------------------------------------------------------------------------|---------------|-----------|-----------|
| 201 | SPRR2A | small proline-rich protein 2A | 3.4205 | 0.0096714 | 2.0145 | 0.23964 | High_Male - High_Female;<br>Low_Female - High_Female;<br>Low_Male - High_Female;<br>Medium_Female - High_Female;<br>High_Female - Medium_Male;<br>Low_Female - High_Male;<br>High_Male - Low_Male;<br>Medium_Female - High_Male;<br>High_Male - Medium_Male;<br>Low_Female - Low_Male;<br>Medium_Female - Low_Female;<br>Low_Female - Medium_Male;<br>Medium_Female - Low_Male;<br>Low_Male - Medium_Male;<br>Medium_Female - Medium_Male | A_33_P3260426 | NM_005988 | NM_005988 |
| 202 | MXI1   | MAX interactor 1              | 3.4197 | 0.0096833 | 2.014  | 0.23964 | High_Female - High_Male;<br>Low_Female - High_Female;<br>Low_Male - High_Female;<br>Medium_Female - High_Female;<br>Medium_Male - High_Female;<br>Low_Female - High_Male;<br>Low_Male - High_Male;<br>Medium_Female - High_Male;<br>Medium_Male - High_Male;<br>Low_Male - Low_Female;<br>Medium_Female - Low_Female;<br>Medium_Male - Low_Female;<br>Medium_Female - Low_Male;<br>Medium_Male - Low_Male;<br>Medium_Female - Medium_Male | A_33_P3263902 | NM_005962 | NM_005962 |

|     |                    |                              |        |           |        |         |                                                                                                                                                                                                                                                                                                                                                                                                                                           |                                          |  |          |
|-----|--------------------|------------------------------|--------|-----------|--------|---------|-------------------------------------------------------------------------------------------------------------------------------------------------------------------------------------------------------------------------------------------------------------------------------------------------------------------------------------------------------------------------------------------------------------------------------------------|------------------------------------------|--|----------|
| 203 | XLOC_I2_0146<br>94 |                              | 3.4087 | 0.009854  | 2.0064 | 0.24243 | High_Male - High_Female;<br>Low_Female - High_Female;<br>Low_Male - High_Female;<br>High_Female - Medium_Female;<br>Medium_Male - High_Female;<br>High_Male - Low_Female;<br>Low_Male - High_Male;<br>High_Male - Medium_Female;<br>Medium_Male - High_Male;<br>Low_Male - Low_Female;<br>Low_Female - Medium_Female;<br>Medium_Male - Low_Female;<br>Low_Male - Medium_Female;<br>Medium_Male - Low_Male;<br>Medium_Male - Medium_Female | tc THC2707131 linc TCONS_I<br>2_00028604 |  |          |
| 204 | LOC10050632<br>8   | uncharacterized LOC100506328 | 3.405  | 0.0099123 | 2.0038 | 0.24243 | High_Female - High_Male;<br>High_Female - Low_Female;<br>High_Female - Low_Male;<br>High_Female - Medium_Female;<br>High_Female - Medium_Male;<br>High_Male - Low_Female;<br>Low_Male - High_Male;<br>High_Male - Medium_Female;<br>Medium_Male - High_Male;<br>Low_Male - Low_Female;<br>Low_Female - Medium_Female;<br>Medium_Male - Low_Female;<br>Low_Male - Medium_Female;<br>Medium_Male - Low_Male;<br>Medium_Male - Medium_Female | A_19_P00317277                           |  | AK055877 |

|     |       |                                              |        |           |        |         |                                                                                                                                                                                                                                                                                                                                                                                                                                           |               |           |           |
|-----|-------|----------------------------------------------|--------|-----------|--------|---------|-------------------------------------------------------------------------------------------------------------------------------------------------------------------------------------------------------------------------------------------------------------------------------------------------------------------------------------------------------------------------------------------------------------------------------------------|---------------|-----------|-----------|
| 205 | 1-Mar | mitochondrial amidoxime reducing component 1 | 3.4032 | 0.0099417 | 2.0025 | 0.24243 | High_Female - High_Male;<br>High_Female - Low_Female;<br>High_Female - Low_Male;<br>High_Female - Medium_Female;<br>High_Female - Medium_Male;<br>High_Male - Low_Female;<br>High_Male - Low_Male;<br>Medium_Female - High_Male;<br>High_Male - Medium_Male;<br>Low_Male - Low_Female;<br>Medium_Female - Low_Female;<br>Medium_Male - Low_Female;<br>Medium_Female - Low_Male;<br>Medium_Male - Low_Male;<br>Medium_Female - Medium_Male | A_33_P3293362 | NM_022746 | NM_022746 |
| 206 | FLNA  | filamin A, alpha                             | 3.3994 | 0.010002  | 1.9999 | 0.24271 | High_Male - High_Female;<br>Low_Female - High_Female;<br>Low_Male - High_Female;<br>Medium_Female - High_Female;<br>Medium_Male - High_Female;<br>Low_Female - High_Male;<br>High_Male - Low_Male;<br>Medium_Female - High_Male;<br>High_Male - Medium_Male;<br>Low_Female - Low_Male;<br>Low_Female - Medium_Female;<br>Low_Female - Medium_Male;<br>Medium_Female - Low_Male;<br>Low_Male - Medium_Male;<br>Medium_Female - Medium_Male | A_33_P3226755 |           | AK125630  |

|     |       |                                                    |        |          |        |        |                                                                                                                                                                                                                                                                                                                                                                                                                                           |               |              |              |
|-----|-------|----------------------------------------------------|--------|----------|--------|--------|-------------------------------------------------------------------------------------------------------------------------------------------------------------------------------------------------------------------------------------------------------------------------------------------------------------------------------------------------------------------------------------------------------------------------------------------|---------------|--------------|--------------|
| 207 | LRRD1 | leucine-rich repeats and death domain containing 1 | 3.3909 | 0.010138 | 1.9941 | 0.2431 | High_Female - High_Male;<br>High_Female - Low_Female;<br>High_Female - Low_Male;<br>Medium_Female - High_Female;<br>High_Female - Medium_Male;<br>Low_Female - High_Male;<br>Low_Male - High_Male;<br>Medium_Female - High_Male;<br>High_Male - Medium_Male;<br>Low_Male - Low_Female;<br>Medium_Female - Low_Female;<br>Low_Female - Medium_Male;<br>Medium_Female - Low_Male;<br>Low_Male - Medium_Male;<br>Medium_Female - Medium_Male | A_33_P3420446 | NM_001161528 | NM_001161528 |
| 208 | SAG   | S-antigen; retina and pineal gland (arrestin)      | 3.3885 | 0.010176 | 1.9924 | 0.2431 | High_Male - High_Female;<br>Low_Female - High_Female;<br>Low_Male - High_Female;<br>Medium_Female - High_Female;<br>Medium_Male - High_Female;<br>High_Male - Low_Female;<br>High_Male - Low_Male;<br>High_Male - Medium_Female;<br>Medium_Male - High_Male;<br>Low_Male - Low_Female;<br>Medium_Female - Low_Female;<br>Medium_Male - Low_Female;<br>Low_Male - Medium_Female;<br>Medium_Male - Low_Male;<br>Medium_Male - Medium_Female | A_23_P5853    | NM_000541    | NM_000541    |

|     |         |                             |        |          |        |        |                                                                                                                                                                                                                                                                                                                                                                                                                                           |              |           |           |
|-----|---------|-----------------------------|--------|----------|--------|--------|-------------------------------------------------------------------------------------------------------------------------------------------------------------------------------------------------------------------------------------------------------------------------------------------------------------------------------------------------------------------------------------------------------------------------------------------|--------------|-----------|-----------|
| 209 | TCL1A   | T-cell leukemia/lymphoma 1A | 3.3868 | 0.010204 | 1.9912 | 0.2431 | High_Male - High_Female;<br>Low_Female - High_Female;<br>Low_Male - High_Female;<br>Medium_Female - High_Female;<br>Medium_Male - High_Female;<br>Low_Female - High_Male;<br>Low_Male - High_Male;<br>Medium_Female - High_Male;<br>Medium_Male - High_Male;<br>Low_Male - Low_Female;<br>Medium_Female - Low_Female;<br>Medium_Male - Low_Female;<br>Low_Male - Medium_Female;<br>Medium_Male - Low_Male;<br>Medium_Male - Medium_Female | A_23_P357717 | NM_021966 | NM_021966 |
| 210 | HRASLS2 | HRAS-like suppressor 2      | 3.3863 | 0.010212 | 1.9909 | 0.2431 | High_Female - High_Male;<br>High_Female - Low_Female;<br>High_Female - Low_Male;<br>High_Female - Medium_Female;<br>High_Female - Medium_Male;<br>High_Male - Low_Female;<br>Low_Male - High_Male;<br>Medium_Female - High_Male;<br>Medium_Male - High_Male;<br>Low_Male - Low_Female;<br>Medium_Female - Low_Female;<br>Medium_Male - Low_Female;<br>Medium_Female - Low_Male;<br>Medium_Male - Low_Male;<br>Medium_Male - Medium_Female | A_23_P105012 | NM_017878 | NM_017878 |

|     |      |                            |        |          |        |         |                                                                                                                                                                                                                                                                                                                                                                                                                                           |               |           |           |
|-----|------|----------------------------|--------|----------|--------|---------|-------------------------------------------------------------------------------------------------------------------------------------------------------------------------------------------------------------------------------------------------------------------------------------------------------------------------------------------------------------------------------------------------------------------------------------------|---------------|-----------|-----------|
| 211 |      |                            | 3.3771 | 0.010363 | 1.9845 | 0.24552 | High_Male - High_Female;<br>Low_Female - High_Female;<br>Low_Male - High_Female;<br>Medium_Female - High_Female;<br>Medium_Male - High_Female;<br>Low_Female - High_Male;<br>Low_Male - High_Male;<br>Medium_Female - High_Male;<br>Medium_Male - High_Male;<br>Low_Male - Low_Female;<br>Low_Female - Medium_Female;<br>Medium_Male - Low_Female;<br>Low_Male - Medium_Female;<br>Low_Male - Medium_Male;<br>Medium_Male - Medium_Female | A_33_P3370019 |           | AK093943  |
| 212 | FAAH | fatty acid amide hydrolase | 3.3719 | 0.010449 | 1.9809 | 0.24639 | High_Male - High_Female;<br>Low_Female - High_Female;<br>Low_Male - High_Female;<br>Medium_Female - High_Female;<br>Medium_Male - High_Female;<br>Low_Female - High_Male;<br>Low_Male - High_Male;<br>Medium_Female - High_Male;<br>High_Male - Medium_Male;<br>Low_Female - Low_Male;<br>Low_Female - Medium_Female;<br>Low_Female - Medium_Male;<br>Low_Male - Medium_Female;<br>Low_Male - Medium_Male;<br>Medium_Female - Medium_Male | A_33_P3261803 | NM_001441 | NM_001441 |

|     |             |                                                        |        |          |        |         |                                                                                                                                                                                                                                                                                                                                                                                                                                           |                                                             |              |              |
|-----|-------------|--------------------------------------------------------|--------|----------|--------|---------|-------------------------------------------------------------------------------------------------------------------------------------------------------------------------------------------------------------------------------------------------------------------------------------------------------------------------------------------------------------------------------------------------------------------------------------------|-------------------------------------------------------------|--------------|--------------|
| 213 | XLOC_005939 |                                                        | 3.3668 | 0.010534 | 1.9774 | 0.24648 | High_Male - High_Female;<br>Low_Female - High_Female;<br>Low_Male - High_Female;<br>Medium_Female - High_Female;<br>Medium_Male - High_Female;<br>Low_Female - High_Male;<br>High_Male - Low_Male;<br>Medium_Female - High_Male;<br>High_Male - Medium_Male;<br>Low_Female - Low_Male;<br>Low_Female - Medium_Female;<br>Low_Female - Medium_Male;<br>Medium_Female - Low_Male;<br>Low_Male - Medium_Male;<br>Medium_Female - Medium_Male | linc TCONS_00012372 linc TCONS_00012371 linc TCONS_00012370 |              |              |
| 214 | XPNPEP3     | X-prolyl aminopeptidase (aminopeptidase P) 3, putative | 3.3658 | 0.010552 | 1.9767 | 0.24648 | High_Male - High_Female;<br>Low_Female - High_Female;<br>Low_Male - High_Female;<br>Medium_Female - High_Female;<br>Medium_Male - High_Female;<br>Low_Female - High_Male;<br>Low_Male - High_Male;<br>Medium_Female - High_Male;<br>Medium_Male - High_Male;<br>Low_Male - Low_Female;<br>Low_Female - Medium_Female;<br>Medium_Male - Low_Female;<br>Low_Male - Medium_Female;<br>Low_Male - Medium_Male;<br>Medium_Male - Medium_Female | A_21_P0000158                                               | NM_001204827 | NM_001204827 |

|     |           |                           |        |          |        |         |                                                                                                                                                                                                                                                                                                                                                                                                                                           |               |           |           |
|-----|-----------|---------------------------|--------|----------|--------|---------|-------------------------------------------------------------------------------------------------------------------------------------------------------------------------------------------------------------------------------------------------------------------------------------------------------------------------------------------------------------------------------------------------------------------------------------------|---------------|-----------|-----------|
| 215 | TMEM146   | transmembrane protein 146 | 3.36   | 0.01065  | 1.9727 | 0.24762 | High_Male - High_Female;<br>Low_Female - High_Female;<br>Low_Male - High_Female;<br>Medium_Female - High_Female;<br>Medium_Male - High_Female;<br>Low_Female - High_Male;<br>Low_Male - High_Male;<br>Medium_Female - High_Male;<br>High_Male - Medium_Male;<br>Low_Male - Low_Female;<br>Medium_Female - Low_Female;<br>Low_Female - Medium_Male;<br>Low_Male - Medium_Female;<br>Low_Male - Medium_Male;<br>Medium_Female - Medium_Male | A_33_P3335257 | NM_152784 | NM_152784 |
| 216 | LOC145837 | uncharacterized LOC145837 | 3.3548 | 0.010737 | 1.9691 | 0.24849 | High_Male - High_Female;<br>Low_Female - High_Female;<br>Low_Male - High_Female;<br>Medium_Female - High_Female;<br>Medium_Male - High_Female;<br>Low_Female - High_Male;<br>Low_Male - High_Male;<br>High_Male - Medium_Female;<br>High_Male - Medium_Male;<br>Low_Female - Low_Male;<br>Low_Female - Medium_Female;<br>Low_Female - Medium_Male;<br>Low_Male - Medium_Female;<br>Low_Male - Medium_Male;<br>Medium_Female - Medium_Male | A_21_P0008647 | NR_026979 | NR_026979 |



|     |           |                                              |        |          |        |         |                                                                                                                                                                                                                                                                                                                                                                                                                                           |              |           |           |
|-----|-----------|----------------------------------------------|--------|----------|--------|---------|-------------------------------------------------------------------------------------------------------------------------------------------------------------------------------------------------------------------------------------------------------------------------------------------------------------------------------------------------------------------------------------------------------------------------------------------|--------------|-----------|-----------|
| 217 | LOC645195 | uncharacterized LOC645195                    | 3.3518 | 0.010789 | 1.967  | 0.24856 | High_Male - High_Female;<br>Low_Female - High_Female;<br>Low_Male - High_Female;<br>Medium_Female - High_Female;<br>Medium_Male - High_Female;<br>Low_Female - High_Male;<br>Low_Male - High_Male;<br>Medium_Female - High_Male;<br>Medium_Male - High_Male;<br>Low_Male - Low_Female;<br>Low_Female - Medium_Female;<br>Low_Female - Medium_Male;<br>Low_Male - Medium_Female;<br>Low_Male - Medium_Male;<br>Medium_Female - Medium_Male | A_32_P224234 |           | AK123450  |
| 218 | IL3RA     | interleukin 3 receptor, alpha (low affinity) | 3.3381 | 0.011027 | 1.9576 | 0.25285 | High_Male - High_Female;<br>Low_Female - High_Female;<br>Low_Male - High_Female;<br>Medium_Female - High_Female;<br>Medium_Male - High_Female;<br>High_Male - Low_Female;<br>High_Male - Low_Male;<br>High_Male - Medium_Female;<br>Medium_Male - High_Male;<br>Low_Male - Low_Female;<br>Low_Female - Medium_Female;<br>Medium_Male - Low_Female;<br>Low_Male - Medium_Female;<br>Medium_Male - Low_Male;<br>Medium_Male - Medium_Female | A_32_P217750 | NM_002183 | NM_002183 |

|     |                  |                              |        |          |        |         |                                                                                                                                                                                                                                                                                                                                                                                                                                           |               |              |              |
|-----|------------------|------------------------------|--------|----------|--------|---------|-------------------------------------------------------------------------------------------------------------------------------------------------------------------------------------------------------------------------------------------------------------------------------------------------------------------------------------------------------------------------------------------------------------------------------------------|---------------|--------------|--------------|
| 219 | CLDN5            | claudin 5                    | 3.3299 | 0.011171 | 1.9519 | 0.25451 | High_Female - High_Male;<br>High_Female - Low_Female;<br>High_Female - Low_Male;<br>Medium_Female - High_Female;<br>High_Female - Medium_Male;<br>Low_Female - High_Male;<br>High_Male - Low_Male;<br>Medium_Female - High_Male;<br>High_Male - Medium_Male;<br>Low_Female - Low_Male;<br>Medium_Female - Low_Female;<br>Low_Female - Medium_Male;<br>Medium_Female - Low_Male;<br>Medium_Male - Low_Male;<br>Medium_Female - Medium_Male | A_33_P3285540 | NM_001130861 | NM_001130861 |
| 220 | 7<br>LOC10013431 | uncharacterized LOC100134317 | 3.3281 | 0.011204 | 1.9506 | 0.25451 | High_Male - High_Female;<br>Low_Female - High_Female;<br>Low_Male - High_Female;<br>Medium_Female - High_Female;<br>Medium_Male - High_Female;<br>Low_Female - High_Male;<br>Low_Male - High_Male;<br>High_Male - Medium_Female;<br>High_Male - Medium_Male;<br>Low_Male - Low_Female;<br>Low_Female - Medium_Female;<br>Low_Female - Medium_Male;<br>Low_Male - Medium_Female;<br>Low_Male - Medium_Male;<br>Medium_Male - Medium_Female | A_21_P0000582 | NR_029389    | NR_029389    |

|     |             |                                    |        |          |        |         |                                                                                                                                                                                                                                                                                                                                                                                                                                           |                     |           |           |
|-----|-------------|------------------------------------|--------|----------|--------|---------|-------------------------------------------------------------------------------------------------------------------------------------------------------------------------------------------------------------------------------------------------------------------------------------------------------------------------------------------------------------------------------------------------------------------------------------------|---------------------|-----------|-----------|
| 221 | ZNHIT2      | zinc finger, HIT-type containing 2 | 3.3231 | 0.011294 | 1.9471 | 0.25451 | High_Male - High_Female;<br>Low_Female - High_Female;<br>Low_Male - High_Female;<br>Medium_Female - High_Female;<br>Medium_Male - High_Female;<br>Low_Female - High_Male;<br>Low_Male - High_Male;<br>High_Male - Medium_Female;<br>High_Male - Medium_Male;<br>Low_Male - Low_Female;<br>Low_Female - Medium_Female;<br>Low_Female - Medium_Male;<br>Low_Male - Medium_Female;<br>Low_Male - Medium_Male;<br>Medium_Female - Medium_Male | A_33_P3213747       | NM_014205 | NM_014205 |
| 222 | XLOC_007635 |                                    | 3.3226 | 0.011302 | 1.9468 | 0.25451 | High_Female - High_Male;<br>Low_Female - High_Female;<br>Low_Male - High_Female;<br>High_Female - Medium_Female;<br>High_Female - Medium_Male;<br>Low_Female - High_Male;<br>Low_Male - High_Male;<br>High_Male - Medium_Female;<br>Medium_Male - High_Male;<br>Low_Male - Low_Female;<br>Low_Female - Medium_Female;<br>Low_Female - Medium_Male;<br>Low_Male - Medium_Female;<br>Low_Male - Medium_Male;<br>Medium_Male - Medium_Female | linc TCONS_00016263 |           |           |

|     |      |                                                                                 |        |          |        |         |                                                                                                                                                                                                                                                                                                                                                                                                                                           |                |           |           |
|-----|------|---------------------------------------------------------------------------------|--------|----------|--------|---------|-------------------------------------------------------------------------------------------------------------------------------------------------------------------------------------------------------------------------------------------------------------------------------------------------------------------------------------------------------------------------------------------------------------------------------------------|----------------|-----------|-----------|
| 223 | TGM2 | transglutaminase 2 (C polypeptide, protein-glutamine-gamma-glutamyltransferase) | 3.3169 | 0.011406 | 1.9429 | 0.25569 | High_Female - High_Male;<br>Low_Female - High_Female;<br>Low_Male - High_Female;<br>High_Female - Medium_Female;<br>High_Female - Medium_Male;<br>Low_Female - High_Male;<br>Low_Male - High_Male;<br>Medium_Female - High_Male;<br>High_Male - Medium_Male;<br>Low_Male - Low_Female;<br>Low_Female - Medium_Female;<br>Low_Female - Medium_Male;<br>Low_Male - Medium_Female;<br>Low_Male - Medium_Male;<br>Medium_Female - Medium_Male | A_24_P923251   | NM_198951 | NM_198951 |
| 224 | 8    | uncharacterized LOC100506328                                                    | 3.309  | 0.011551 | 1.9374 | 0.25779 | High_Female - High_Male;<br>High_Female - Low_Female;<br>High_Female - Low_Male;<br>High_Female - Medium_Female;<br>High_Female - Medium_Male;<br>High_Male - Low_Female;<br>High_Male - Low_Male;<br>High_Male - Medium_Female;<br>Medium_Male - High_Male;<br>Low_Male - Low_Female;<br>Medium_Female - Low_Female;<br>Medium_Male - Low_Female;<br>Medium_Female - Low_Male;<br>Medium_Male - Low_Male;<br>Medium_Male - Medium_Female | A_19_P00321148 |           | AK055877  |

|     |          |                                     |        |          |        |         |                                                                                                                                                                                                                                                                                                                                                                                                                                           |               |              |              |
|-----|----------|-------------------------------------|--------|----------|--------|---------|-------------------------------------------------------------------------------------------------------------------------------------------------------------------------------------------------------------------------------------------------------------------------------------------------------------------------------------------------------------------------------------------------------------------------------------------|---------------|--------------|--------------|
| 225 | C1orf190 | chromosome 1 open reading frame 190 | 3.3003 | 0.011711 | 1.9314 | 0.25964 | High_Male - High_Female;<br>Low_Female - High_Female;<br>Low_Male - High_Female;<br>Medium_Female - High_Female;<br>High_Female - Medium_Male;<br>Low_Female - High_Male;<br>Low_Male - High_Male;<br>Medium_Female - High_Male;<br>High_Male - Medium_Male;<br>Low_Male - Low_Female;<br>Medium_Female - Low_Female;<br>Low_Female - Medium_Male;<br>Low_Male - Medium_Female;<br>Low_Male - Medium_Male;<br>Medium_Female - Medium_Male | A_33_P3400823 | NM_001013615 | NM_001013615 |
| 226 | C12orf51 | chromosome 12 open reading frame 51 | 3.2989 | 0.011738 | 1.9304 | 0.25964 | High_Male - High_Female;<br>Low_Female - High_Female;<br>Low_Male - High_Female;<br>Medium_Female - High_Female;<br>Medium_Male - High_Female;<br>Low_Female - High_Male;<br>Low_Male - High_Male;<br>Medium_Female - High_Male;<br>High_Male - Medium_Male;<br>Low_Male - Low_Female;<br>Low_Female - Medium_Female;<br>Low_Female - Medium_Male;<br>Low_Male - Medium_Female;<br>Low_Male - Medium_Male;<br>Medium_Female - Medium_Male | A_23_P309292  | NM_001109662 | NM_001109662 |

|     |             |                               |        |          |        |         |                                                                                                                                                                                                                                                                                                                                                                                                                                           |                     |           |           |
|-----|-------------|-------------------------------|--------|----------|--------|---------|-------------------------------------------------------------------------------------------------------------------------------------------------------------------------------------------------------------------------------------------------------------------------------------------------------------------------------------------------------------------------------------------------------------------------------------------|---------------------|-----------|-----------|
| 227 | IL5RA       | interleukin 5 receptor, alpha | 3.2909 | 0.011888 | 1.9249 | 0.2618  | High_Male - High_Female;<br>Low_Female - High_Female;<br>Low_Male - High_Female;<br>Medium_Female - High_Female;<br>Medium_Male - High_Female;<br>High_Male - Low_Female;<br>High_Male - Low_Male;<br>High_Male - Medium_Female;<br>High_Male - Medium_Male;<br>Low_Male - Low_Female;<br>Medium_Female - Low_Female;<br>Medium_Male - Low_Female;<br>Low_Male - Medium_Female;<br>Medium_Male - Low_Male;<br>Medium_Male - Medium_Female | A_33_P3328254       | NM_175725 | NM_175725 |
| 228 | XLOC_002996 |                               | 3.2848 | 0.012005 | 1.9206 | 0.26198 | High_Male - High_Female;<br>Low_Female - High_Female;<br>Low_Male - High_Female;<br>Medium_Female - High_Female;<br>Medium_Male - High_Female;<br>Low_Female - High_Male;<br>Low_Male - High_Male;<br>Medium_Female - High_Male;<br>High_Male - Medium_Male;<br>Low_Male - Low_Female;<br>Medium_Female - Low_Female;<br>Low_Female - Medium_Male;<br>Low_Male - Medium_Female;<br>Low_Male - Medium_Male;<br>Medium_Female - Medium_Male | linc TCONS_00006377 |           |           |

|     |          |                                                          |        |          |        |         |                                                                                                                                                                                                                                                                                                                                                                                                                                           |              |           |           |
|-----|----------|----------------------------------------------------------|--------|----------|--------|---------|-------------------------------------------------------------------------------------------------------------------------------------------------------------------------------------------------------------------------------------------------------------------------------------------------------------------------------------------------------------------------------------------------------------------------------------------|--------------|-----------|-----------|
| 229 | ATCAY    | ataxia, cerebellar, Cayman type                          | 3.2845 | 0.012011 | 1.9204 | 0.26198 | High_Male - High_Female;<br>Low_Female - High_Female;<br>Low_Male - High_Female;<br>Medium_Female - High_Female;<br>High_Female - Medium_Male;<br>Low_Female - High_Male;<br>Low_Male - High_Male;<br>Medium_Female - High_Male;<br>High_Male - Medium_Male;<br>Low_Male - Low_Female;<br>Medium_Female - Low_Female;<br>Low_Female - Medium_Male;<br>Medium_Female - Low_Male;<br>Low_Male - Medium_Male;<br>Medium_Female - Medium_Male | A_24_P40094  | NM_033064 | NM_033064 |
| 230 | CRISPLD2 | cysteine-rich secretory protein LCCL domain containing 2 | 3.281  | 0.012078 | 1.918  | 0.26198 | High_Female - High_Male;<br>High_Female - Low_Female;<br>High_Female - Low_Male;<br>High_Female - Medium_Female;<br>High_Female - Medium_Male;<br>High_Male - Low_Female;<br>High_Male - Low_Male;<br>High_Male - Medium_Female;<br>High_Male - Medium_Male;<br>Low_Female - Low_Male;<br>Medium_Female - Low_Female;<br>Medium_Male - Low_Female;<br>Medium_Female - Low_Male;<br>Medium_Male - Low_Male;<br>Medium_Female - Medium_Male | A_23_P106602 | NM_031476 | NM_031476 |

|     |        |                                |        |          |        |         |                                                                                                                                                                                                                                                                                                                                                                                                                                           |               |           |           |
|-----|--------|--------------------------------|--------|----------|--------|---------|-------------------------------------------------------------------------------------------------------------------------------------------------------------------------------------------------------------------------------------------------------------------------------------------------------------------------------------------------------------------------------------------------------------------------------------------|---------------|-----------|-----------|
| 231 |        |                                | 3.2771 | 0.012154 | 1.9153 | 0.26198 | High_Female - High_Male;<br>High_Female - Low_Female;<br>Low_Male - High_Female;<br>Medium_Female - High_Female;<br>High_Female - Medium_Male;<br>Low_Female - High_Male;<br>Low_Male - High_Male;<br>Medium_Female - High_Male;<br>Medium_Male - High_Male;<br>Low_Male - Low_Female;<br>Medium_Female - Low_Female;<br>Low_Female - Medium_Male;<br>Medium_Female - Low_Male;<br>Low_Male - Medium_Male;<br>Medium_Female - Medium_Male | A_33_P3382887 |           |           |
| 232 | GPR141 | G protein-coupled receptor 141 | 3.2768 | 0.012158 | 1.9151 | 0.26198 | High_Female - High_Male;<br>High_Female - Low_Female;<br>High_Female - Low_Male;<br>High_Female - Medium_Female;<br>High_Female - Medium_Male;<br>Low_Female - High_Male;<br>High_Male - Low_Male;<br>Medium_Female - High_Male;<br>Medium_Male - High_Male;<br>Low_Female - Low_Male;<br>Medium_Female - Low_Female;<br>Medium_Male - Low_Female;<br>Medium_Female - Low_Male;<br>Medium_Male - Low_Male;<br>Medium_Male - Medium_Female | A_24_P334718  | NM_181791 | NM_181791 |



|     |       |                                           |        |          |        |         |                                                                                                                                                                                                                                                                                                                                                                                                                                           |                |           |           |
|-----|-------|-------------------------------------------|--------|----------|--------|---------|-------------------------------------------------------------------------------------------------------------------------------------------------------------------------------------------------------------------------------------------------------------------------------------------------------------------------------------------------------------------------------------------------------------------------------------------|----------------|-----------|-----------|
| 233 | HCG18 | HLA complex group 18 (non-protein coding) | 3.2722 | 0.01225  | 1.9119 | 0.26281 | High_Male - High_Female;<br>Low_Female - High_Female;<br>Low_Male - High_Female;<br>Medium_Female - High_Female;<br>Medium_Male - High_Female;<br>Low_Female - High_Male;<br>Low_Male - High_Male;<br>Medium_Female - High_Male;<br>High_Male - Medium_Male;<br>Low_Male - Low_Female;<br>Low_Female - Medium_Female;<br>Low_Female - Medium_Male;<br>Low_Male - Medium_Female;<br>Low_Male - Medium_Male;<br>Medium_Female - Medium_Male | A_19_P00321473 | NR_024052 | NR_024052 |
| 234 | RGS14 | regulator of G-protein signaling 14       | 3.2666 | 0.012359 | 1.908  | 0.26396 | High_Female - High_Male;<br>High_Female - Low_Female;<br>High_Female - Low_Male;<br>High_Female - Medium_Female;<br>High_Female - Medium_Male;<br>High_Male - Low_Female;<br>High_Male - Low_Male;<br>Medium_Female - High_Male;<br>Medium_Male - High_Male;<br>Low_Female - Low_Male;<br>Medium_Female - Low_Female;<br>Medium_Male - Low_Female;<br>Medium_Female - Low_Male;<br>Medium_Male - Low_Male;<br>Medium_Male - Medium_Female | A_23_P124927   | NM_006480 | NM_006480 |

|     |        |                                   |        |          |        |         |                                                                                                                                                                                                                                                                                                                                                                                                                                           |               |           |           |
|-----|--------|-----------------------------------|--------|----------|--------|---------|-------------------------------------------------------------------------------------------------------------------------------------------------------------------------------------------------------------------------------------------------------------------------------------------------------------------------------------------------------------------------------------------------------------------------------------------|---------------|-----------|-----------|
| 235 | BMS1P1 | BMS1 pseudogene 1                 | 3.2638 | 0.012414 | 1.9061 | 0.26396 | High_Female - High_Male;<br>Low_Female - High_Female;<br>Low_Male - High_Female;<br>Medium_Female - High_Female;<br>Medium_Male - High_Female;<br>Low_Female - High_Male;<br>Low_Male - High_Male;<br>Medium_Female - High_Male;<br>Medium_Male - High_Male;<br>Low_Male - Low_Female;<br>Low_Female - Medium_Female;<br>Medium_Male - Low_Female;<br>Low_Male - Medium_Female;<br>Low_Male - Medium_Male;<br>Medium_Male - Medium_Female | A_21_P0010879 | NR_026566 | NR_026566 |
| 236 | LRRC14 | leucine rich repeat containing 14 | 3.2574 | 0.012542 | 1.9016 | 0.26396 | High_Male - High_Female;<br>Low_Female - High_Female;<br>Low_Male - High_Female;<br>Medium_Female - High_Female;<br>Medium_Male - High_Female;<br>Low_Female - High_Male;<br>Low_Male - High_Male;<br>Medium_Female - High_Male;<br>Medium_Male - High_Male;<br>Low_Male - Low_Female;<br>Low_Female - Medium_Female;<br>Medium_Male - Low_Female;<br>Low_Male - Medium_Female;<br>Low_Male - Medium_Male;<br>Medium_Male - Medium_Female | A_24_P363745  | NM_014665 | NM_014665 |

|     |       |                                 |        |          |        |         |                                                                                                                                                                                                                                                                                                                                                                                                                                           |                    |           |           |
|-----|-------|---------------------------------|--------|----------|--------|---------|-------------------------------------------------------------------------------------------------------------------------------------------------------------------------------------------------------------------------------------------------------------------------------------------------------------------------------------------------------------------------------------------------------------------------------------------|--------------------|-----------|-----------|
| 237 |       |                                 | 3.2569 | 0.012551 | 1.9013 | 0.26396 | High_Male - High_Female;<br>Low_Female - High_Female;<br>Low_Male - High_Female;<br>Medium_Female - High_Female;<br>Medium_Male - High_Female;<br>Low_Female - High_Male;<br>High_Male - Low_Male;<br>High_Male - Medium_Female;<br>High_Male - Medium_Male;<br>Low_Female - Low_Male;<br>Low_Female - Medium_Female;<br>Low_Female - Medium_Male;<br>Medium_Female - Low_Male;<br>Low_Male - Medium_Male;<br>Medium_Female - Medium_Male | ens ENST0000052290 |           |           |
| 238 | NEURL | neuralized homolog (Drosophila) | 3.2538 | 0.012615 | 1.8991 | 0.26396 | High_Female - High_Male;<br>High_Female - Low_Female;<br>Low_Male - High_Female;<br>Medium_Female - High_Female;<br>High_Female - Medium_Male;<br>Low_Female - High_Male;<br>Low_Male - High_Male;<br>Medium_Female - High_Male;<br>High_Male - Medium_Male;<br>Low_Male - Low_Female;<br>Medium_Female - Low_Female;<br>Low_Female - Medium_Male;<br>Medium_Female - Low_Male;<br>Low_Male - Medium_Male;<br>Medium_Female - Medium_Male | A_33_P3293524      | NM_004210 | NM_004210 |

|     |        |                                            |        |          |        |         |                                                                                                                                                                                                                                                                                                                                                                                                                                           |               |           |           |
|-----|--------|--------------------------------------------|--------|----------|--------|---------|-------------------------------------------------------------------------------------------------------------------------------------------------------------------------------------------------------------------------------------------------------------------------------------------------------------------------------------------------------------------------------------------------------------------------------------------|---------------|-----------|-----------|
| 239 |        |                                            | 3.2483 | 0.012725 | 1.8953 | 0.26396 | High_Male - High_Female;<br>Low_Female - High_Female;<br>Low_Male - High_Female;<br>Medium_Female - High_Female;<br>Medium_Male - High_Female;<br>Low_Female - High_Male;<br>Low_Male - High_Male;<br>Medium_Female - High_Male;<br>High_Male - Medium_Male;<br>Low_Male - Low_Female;<br>Medium_Female - Low_Female;<br>Low_Female - Medium_Male;<br>Low_Male - Medium_Female;<br>Low_Male - Medium_Male;<br>Medium_Female - Medium_Male | A_33_P3339202 |           |           |
| 240 | HILPDA | hypoxia inducible lipid droplet-associated | 3.2472 | 0.012747 | 1.8946 | 0.26396 | High_Male - High_Female;<br>High_Female - Low_Female;<br>High_Female - Low_Male;<br>Medium_Female - High_Female;<br>Medium_Male - High_Female;<br>High_Male - Low_Female;<br>High_Male - Low_Male;<br>High_Male - Medium_Female;<br>High_Male - Medium_Male;<br>Low_Male - Low_Female;<br>Medium_Female - Low_Female;<br>Medium_Male - Low_Female;<br>Medium_Female - Low_Male;<br>Medium_Male - Low_Male;<br>Medium_Male - Medium_Female | A_23_P20022   | NM_013332 | NM_013332 |

|     |                    |                                                   |        |          |        |         |                                                                                                                                                                                                                                                                                                                                                                                                                                           |               |           |           |
|-----|--------------------|---------------------------------------------------|--------|----------|--------|---------|-------------------------------------------------------------------------------------------------------------------------------------------------------------------------------------------------------------------------------------------------------------------------------------------------------------------------------------------------------------------------------------------------------------------------------------------|---------------|-----------|-----------|
| 241 | XLOC_I2_0074<br>24 |                                                   | 3.2441 | 0.01281  | 1.8924 | 0.26396 | High_Female - High_Male;<br>High_Female - Low_Female;<br>High_Female - Low_Male;<br>High_Female - Medium_Female;<br>High_Female - Medium_Male;<br>Low_Female - High_Male;<br>High_Male - Low_Male;<br>Medium_Female - High_Male;<br>Medium_Male - High_Male;<br>Low_Female - Low_Male;<br>Medium_Female - Low_Female;<br>Low_Female - Medium_Male;<br>Medium_Female - Low_Male;<br>Medium_Male - Low_Male;<br>Medium_Female - Medium_Male | A_21_P0011814 |           | CB178477  |
| 242 | ARHGEF4            | Rho guanine nucleotide exchange factor<br>(GEF) 4 | 3.242  | 0.012853 | 1.891  | 0.26396 | High_Male - High_Female;<br>Low_Female - High_Female;<br>Low_Male - High_Female;<br>Medium_Female - High_Female;<br>Medium_Male - High_Female;<br>Low_Female - High_Male;<br>Low_Male - High_Male;<br>Medium_Female - High_Male;<br>Medium_Male - High_Male;<br>Low_Male - Low_Female;<br>Low_Female - Medium_Female;<br>Low_Female - Medium_Male;<br>Low_Male - Medium_Female;<br>Low_Male - Medium_Male;<br>Medium_Male - Medium_Female | A_23_P253221  | NM_032995 | NM_032995 |

|     |                    |  |        |          |       |         |                                                                                                                                                                                                                                                                                                                                                                                                                                           |                                                        |  |  |
|-----|--------------------|--|--------|----------|-------|---------|-------------------------------------------------------------------------------------------------------------------------------------------------------------------------------------------------------------------------------------------------------------------------------------------------------------------------------------------------------------------------------------------------------------------------------------------|--------------------------------------------------------|--|--|
| 243 | XLOC_002975        |  | 3.2405 | 0.012884 | 1.89  | 0.26396 | High_Male - High_Female;<br>Low_Female - High_Female;<br>Low_Male - High_Female;<br>Medium_Female - High_Female;<br>Medium_Male - High_Female;<br>Low_Female - High_Male;<br>High_Male - Low_Male;<br>Medium_Female - High_Male;<br>High_Male - Medium_Male;<br>Low_Female - Low_Male;<br>Low_Female - Medium_Female;<br>Low_Female - Medium_Male;<br>Medium_Female - Low_Male;<br>Medium_Male - Low_Male;<br>Medium_Female - Medium_Male | linc TCONS_00006356                                    |  |  |
| 244 | XLOC_I2_0139<br>31 |  | 3.2391 | 0.012913 | 1.889 | 0.26396 | High_Female - High_Male;<br>Low_Female - High_Female;<br>Low_Male - High_Female;<br>Medium_Female - High_Female;<br>Medium_Male - High_Female;<br>Low_Female - High_Male;<br>Low_Male - High_Male;<br>Medium_Female - High_Male;<br>Medium_Male - High_Male;<br>Low_Male - Low_Female;<br>Low_Female - Medium_Female;<br>Medium_Male - Low_Female;<br>Low_Male - Medium_Female;<br>Low_Male - Medium_Male;<br>Medium_Male - Medium_Female | tc THC2539716 tc THC25670<br>33 linc TCONS_I2_00026784 |  |  |

|     |        |                                                        |        |          |        |         |                                                                                                                                                                                                                                                                                                                                                                                                                                           |              |           |           |
|-----|--------|--------------------------------------------------------|--------|----------|--------|---------|-------------------------------------------------------------------------------------------------------------------------------------------------------------------------------------------------------------------------------------------------------------------------------------------------------------------------------------------------------------------------------------------------------------------------------------------|--------------|-----------|-----------|
| 245 | IGFBP2 | insulin-like growth factor binding protein 2,<br>36kDa | 3.2358 | 0.012983 | 1.8866 | 0.26396 | High_Female - High_Male;<br>High_Female - Low_Female;<br>High_Female - Low_Male;<br>High_Female - Medium_Female;<br>High_Female - Medium_Male;<br>Low_Female - High_Male;<br>High_Male - Low_Male;<br>Medium_Female - High_Male;<br>High_Male - Medium_Male;<br>Low_Female - Low_Male;<br>Low_Female - Medium_Female;<br>Low_Female - Medium_Male;<br>Medium_Female - Low_Male;<br>Low_Male - Medium_Male;<br>Medium_Female - Medium_Male | A_23_P119943 | NM_000597 | NM_000597 |
| 246 | PRSS36 | protease, serine, 36                                   | 3.2354 | 0.01299  | 1.8864 | 0.26396 | High_Female - High_Male;<br>High_Female - Low_Female;<br>Low_Male - High_Female;<br>Medium_Female - High_Female;<br>High_Female - Medium_Male;<br>Low_Female - High_Male;<br>Low_Male - High_Male;<br>Medium_Female - High_Male;<br>High_Male - Medium_Male;<br>Low_Male - Low_Female;<br>Medium_Female - Low_Female;<br>Low_Female - Medium_Male;<br>Medium_Female - Low_Male;<br>Low_Male - Medium_Male;<br>Medium_Female - Medium_Male | A_24_P412734 | NM_173502 | NM_173502 |

|     |      |                            |        |          |        |         |                                                                                                                                                                                                                                                                                                                                                                                                                                           |               |              |              |
|-----|------|----------------------------|--------|----------|--------|---------|-------------------------------------------------------------------------------------------------------------------------------------------------------------------------------------------------------------------------------------------------------------------------------------------------------------------------------------------------------------------------------------------------------------------------------------------|---------------|--------------|--------------|
| 247 | MXD3 | MAX dimerization protein 3 | 3.2289 | 0.013125 | 1.8819 | 0.26487 | High_Female - High_Male;<br>High_Female - Low_Female;<br>High_Female - Low_Male;<br>High_Female - Medium_Female;<br>High_Female - Medium_Male;<br>High_Male - Low_Female;<br>High_Male - Low_Male;<br>High_Male - Medium_Female;<br>High_Male - Medium_Male;<br>Low_Female - Low_Male;<br>Medium_Female - Low_Female;<br>Medium_Male - Low_Female;<br>Medium_Female - Low_Male;<br>Medium_Male - Low_Male;<br>Medium_Female - Medium_Male | A_24_P417706  | NM_001142935 | NM_001142935 |
| 248 |      |                            | 3.2282 | 0.01314  | 1.8814 | 0.26487 | High_Female - High_Male;<br>High_Female - Low_Female;<br>High_Female - Low_Male;<br>Medium_Female - High_Female;<br>High_Female - Medium_Male;<br>Low_Female - High_Male;<br>Low_Male - High_Male;<br>Medium_Female - High_Male;<br>High_Male - Medium_Male;<br>Low_Male - Low_Female;<br>Medium_Female - Low_Female;<br>Low_Female - Medium_Male;<br>Medium_Female - Low_Male;<br>Low_Male - Medium_Male;<br>Medium_Female - Medium_Male | A_33_P3363305 |              |              |



|     |           |                                      |        |          |        |         |                                                                                                                                                                                                                                                                                                                                                                                                                                           |               |           |           |
|-----|-----------|--------------------------------------|--------|----------|--------|---------|-------------------------------------------------------------------------------------------------------------------------------------------------------------------------------------------------------------------------------------------------------------------------------------------------------------------------------------------------------------------------------------------------------------------------------------------|---------------|-----------|-----------|
| 249 | GFRA4     | GDNF family receptor alpha 4         | 3.2156 | 0.013408 | 1.8726 | 0.26918 | High_Male - High_Female;<br>Low_Female - High_Female;<br>Low_Male - High_Female;<br>Medium_Female - High_Female;<br>Medium_Male - High_Female;<br>High_Male - Low_Female;<br>High_Male - Low_Male;<br>High_Male - Medium_Female;<br>High_Male - Medium_Male;<br>Low_Female - Low_Male;<br>Low_Female - Medium_Female;<br>Low_Female - Medium_Male;<br>Medium_Female - Low_Male;<br>Low_Male - Medium_Male;<br>Medium_Female - Medium_Male | A_33_P3317589 | NM_145762 | NM_145762 |
| 250 | C17orf103 | chromosome 17 open reading frame 103 | 3.209  | 0.013551 | 1.868  | 0.27096 | High_Male - High_Female;<br>Low_Female - High_Female;<br>Low_Male - High_Female;<br>Medium_Female - High_Female;<br>Medium_Male - High_Female;<br>Low_Female - High_Male;<br>Low_Male - High_Male;<br>Medium_Female - High_Male;<br>High_Male - Medium_Male;<br>Low_Male - Low_Female;<br>Low_Female - Medium_Female;<br>Low_Female - Medium_Male;<br>Low_Male - Medium_Female;<br>Low_Male - Medium_Male;<br>Medium_Female - Medium_Male | A_33_P3334015 | NM_152914 | NM_152914 |

|     |          |                                    |        |          |        |         |                                                                                                                                                                                                                                                                                                                                                                                                                                           |               |           |           |
|-----|----------|------------------------------------|--------|----------|--------|---------|-------------------------------------------------------------------------------------------------------------------------------------------------------------------------------------------------------------------------------------------------------------------------------------------------------------------------------------------------------------------------------------------------------------------------------------------|---------------|-----------|-----------|
| 251 |          |                                    | 3.1993 | 0.013761 | 1.8613 | 0.27407 | High_Male - High_Female;<br>Low_Female - High_Female;<br>Low_Male - High_Female;<br>Medium_Female - High_Female;<br>Medium_Male - High_Female;<br>High_Male - Low_Female;<br>High_Male - Low_Male;<br>High_Male - Medium_Female;<br>High_Male - Medium_Male;<br>Low_Male - Low_Female;<br>Medium_Female - Low_Female;<br>Low_Female - Medium_Male;<br>Low_Male - Medium_Female;<br>Low_Male - Medium_Male;<br>Medium_Female - Medium_Male | A_33_P3335401 |           |           |
| 252 | CCDC144A | coiled-coil domain containing 144A | 3.1924 | 0.013915 | 1.8565 | 0.27413 | High_Male - High_Female;<br>Low_Female - High_Female;<br>Low_Male - High_Female;<br>Medium_Female - High_Female;<br>Medium_Male - High_Female;<br>Low_Female - High_Male;<br>Low_Male - High_Male;<br>Medium_Female - High_Male;<br>Medium_Male - High_Male;<br>Low_Male - Low_Female;<br>Low_Female - Medium_Female;<br>Low_Female - Medium_Male;<br>Low_Male - Medium_Female;<br>Low_Male - Medium_Male;<br>Medium_Male - Medium_Female | A_33_P3390580 | NM_014695 | NM_014695 |

|     |       |                                  |        |          |        |         |                                                                                                                                                                                                                                                                                                                                                                                                                                           |               |           |           |
|-----|-------|----------------------------------|--------|----------|--------|---------|-------------------------------------------------------------------------------------------------------------------------------------------------------------------------------------------------------------------------------------------------------------------------------------------------------------------------------------------------------------------------------------------------------------------------------------------|---------------|-----------|-----------|
| 253 | TAOK2 | TAO kinase 2                     | 3.1904 | 0.013959 | 1.8551 | 0.27413 | High_Male - High_Female;<br>Low_Female - High_Female;<br>Low_Male - High_Female;<br>Medium_Female - High_Female;<br>High_Female - Medium_Male;<br>Low_Female - High_Male;<br>Low_Male - High_Male;<br>High_Male - Medium_Female;<br>High_Male - Medium_Male;<br>Low_Female - Low_Male;<br>Low_Female - Medium_Female;<br>Low_Female - Medium_Male;<br>Low_Male - Medium_Female;<br>Low_Male - Medium_Male;<br>Medium_Female - Medium_Male | A_33_P3346098 | NM_016151 | NM_016151 |
| 254 | UBE2O | ubiquitin-conjugating enzyme E2O | 3.1895 | 0.013979 | 1.8545 | 0.27413 | High_Female - High_Male;<br>Low_Female - High_Female;<br>Low_Male - High_Female;<br>Medium_Female - High_Female;<br>High_Female - Medium_Male;<br>Low_Female - High_Male;<br>Low_Male - High_Male;<br>Medium_Female - High_Male;<br>Medium_Male - High_Male;<br>Low_Female - Low_Male;<br>Medium_Female - Low_Female;<br>Low_Female - Medium_Male;<br>Medium_Female - Low_Male;<br>Low_Male - Medium_Male;<br>Medium_Female - Medium_Male | A_24_P172993  | NM_022066 | NM_022066 |

|     |          |                                                                                     |        |          |        |         |                                                                                                                                                                                                                                                                                                                                                                                                                                           |               |           |           |
|-----|----------|-------------------------------------------------------------------------------------|--------|----------|--------|---------|-------------------------------------------------------------------------------------------------------------------------------------------------------------------------------------------------------------------------------------------------------------------------------------------------------------------------------------------------------------------------------------------------------------------------------------------|---------------|-----------|-----------|
| 255 | SERPINA1 | serpin peptidase inhibitor, clade A (alpha-1 antiproteinase, antitrypsin), member 1 | 3.1893 | 0.013984 | 1.8544 | 0.27413 | High_Male - High_Female;<br>Low_Female - High_Female;<br>Low_Male - High_Female;<br>Medium_Female - High_Female;<br>Medium_Male - High_Female;<br>High_Male - Low_Female;<br>Low_Male - High_Male;<br>High_Male - Medium_Female;<br>Medium_Male - High_Male;<br>Low_Male - Low_Female;<br>Low_Female - Medium_Female;<br>Medium_Male - Low_Female;<br>Low_Male - Medium_Female;<br>Low_Male - Medium_Male;<br>Medium_Male - Medium_Female | A_33_P3289659 |           | BX248257  |
| 256 | DSP      | desmoplakin                                                                         | 3.1828 | 0.01413  | 1.8498 | 0.27593 | High_Female - High_Male;<br>Low_Female - High_Female;<br>Low_Male - High_Female;<br>Medium_Female - High_Female;<br>Medium_Male - High_Female;<br>Low_Female - High_Male;<br>Low_Male - High_Male;<br>Medium_Female - High_Male;<br>Medium_Male - High_Male;<br>Low_Male - Low_Female;<br>Medium_Female - Low_Female;<br>Medium_Male - Low_Female;<br>Medium_Female - Low_Male;<br>Medium_Male - Low_Male;<br>Medium_Male - Medium_Female | A_33_P3402565 | NM_004415 | NM_004415 |

|     |          |                                                      |        |          |        |         |                                                                                                                                                                                                                                                                                                                                                                                                                                           |               |           |           |
|-----|----------|------------------------------------------------------|--------|----------|--------|---------|-------------------------------------------------------------------------------------------------------------------------------------------------------------------------------------------------------------------------------------------------------------------------------------------------------------------------------------------------------------------------------------------------------------------------------------------|---------------|-----------|-----------|
| 257 | BNIP3L   | BCL2/adenovirus E1B 19kDa interacting protein 3-like | 3.1785 | 0.014227 | 1.8469 | 0.27642 | High_Female - High_Male;<br>Low_Female - High_Female;<br>Low_Male - High_Female;<br>Medium_Female - High_Female;<br>High_Female - Medium_Male;<br>Low_Female - High_Male;<br>Low_Male - High_Male;<br>Medium_Female - High_Male;<br>Medium_Male - High_Male;<br>Low_Male - Low_Female;<br>Low_Female - Medium_Female;<br>Low_Female - Medium_Male;<br>Low_Male - Medium_Female;<br>Low_Male - Medium_Male;<br>Medium_Female - Medium_Male | A_33_P3396951 | NM_004331 | NM_004331 |
| 258 | FLJ39051 | uncharacterized LOC399972                            | 3.1749 | 0.014309 | 1.8444 | 0.27642 | High_Female - High_Male;<br>High_Female - Low_Female;<br>High_Female - Low_Male;<br>High_Female - Medium_Female;<br>High_Female - Medium_Male;<br>Low_Female - High_Male;<br>High_Male - Low_Male;<br>Medium_Female - High_Male;<br>Medium_Male - High_Male;<br>Low_Female - Low_Male;<br>Medium_Female - Low_Female;<br>Medium_Male - Low_Female;<br>Medium_Female - Low_Male;<br>Medium_Male - Low_Male;<br>Medium_Female - Medium_Male | A_21_P0000607 | NR_033839 | NR_033839 |

|     |       |                                    |        |          |        |         |                                                                                                                                                                                                                                                                                                                                                                                                                                           |               |              |              |
|-----|-------|------------------------------------|--------|----------|--------|---------|-------------------------------------------------------------------------------------------------------------------------------------------------------------------------------------------------------------------------------------------------------------------------------------------------------------------------------------------------------------------------------------------------------------------------------------------|---------------|--------------|--------------|
| 259 | ARGFX | arginine-fifty homeobox            | 3.1744 | 0.014321 | 1.844  | 0.27642 | High_Male - High_Female;<br>Low_Female - High_Female;<br>Low_Male - High_Female;<br>Medium_Female - High_Female;<br>High_Female - Medium_Male;<br>Low_Female - High_Male;<br>High_Male - Low_Male;<br>High_Male - Medium_Female;<br>High_Male - Medium_Male;<br>Low_Female - Low_Male;<br>Low_Female - Medium_Female;<br>Low_Female - Medium_Male;<br>Low_Male - Medium_Female;<br>Low_Male - Medium_Male;<br>Medium_Female - Medium_Male | A_33_P3209706 | NM_001012659 | NM_001012659 |
| 260 | CHRM4 | cholinergic receptor, muscarinic 4 | 3.1689 | 0.014448 | 1.8402 | 0.27776 | High_Male - High_Female;<br>High_Female - Low_Female;<br>Low_Male - High_Female;<br>Medium_Female - High_Female;<br>Medium_Male - High_Female;<br>High_Male - Low_Female;<br>High_Male - Low_Male;<br>High_Male - Medium_Female;<br>High_Male - Medium_Male;<br>Low_Male - Low_Female;<br>Medium_Female - Low_Female;<br>Medium_Male - Low_Female;<br>Medium_Female - Low_Male;<br>Medium_Male - Low_Male;<br>Medium_Female - Medium_Male | A_33_P3367850 | NM_000741    | NM_000741    |

|     |         |                                                     |        |          |        |         |                                                                                                                                                                                                                                                                                                                                                                                                                                           |              |              |              |
|-----|---------|-----------------------------------------------------|--------|----------|--------|---------|-------------------------------------------------------------------------------------------------------------------------------------------------------------------------------------------------------------------------------------------------------------------------------------------------------------------------------------------------------------------------------------------------------------------------------------------|--------------|--------------|--------------|
| 261 | C2orf63 | chromosome 2 open reading frame 63                  | 3.1665 | 0.014502 | 1.8386 | 0.27776 | High_Female - High_Male;<br>Low_Female - High_Female;<br>Low_Male - High_Female;<br>High_Female - Medium_Female;<br>Medium_Male - High_Female;<br>Low_Female - High_Male;<br>Low_Male - High_Male;<br>High_Male - Medium_Female;<br>Medium_Male - High_Male;<br>Low_Female - Low_Male;<br>Low_Female - Medium_Female;<br>Low_Female - Medium_Male;<br>Low_Male - Medium_Female;<br>Low_Male - Medium_Male;<br>Medium_Male - Medium_Female | A_23_P257417 | NM_152385    | NM_152385    |
| 262 | OR1S2   | olfactory receptor, family 1, subfamily S, member 2 | 3.1539 | 0.014799 | 1.8298 | 0.2808  | High_Male - High_Female;<br>Low_Female - High_Female;<br>Low_Male - High_Female;<br>Medium_Female - High_Female;<br>Medium_Male - High_Female;<br>Low_Female - High_Male;<br>High_Male - Low_Male;<br>High_Male - Medium_Female;<br>High_Male - Medium_Male;<br>Low_Female - Low_Male;<br>Low_Female - Medium_Female;<br>Low_Female - Medium_Male;<br>Medium_Female - Low_Male;<br>Low_Male - Medium_Male;<br>Medium_Female - Medium_Male | A_23_P13294  | NM_001004459 | NM_001004459 |

|     |             |                     |        |          |        |        |                                                                                                                                                                                                                                                                                                                                                                                                                                           |                     |              |              |
|-----|-------------|---------------------|--------|----------|--------|--------|-------------------------------------------------------------------------------------------------------------------------------------------------------------------------------------------------------------------------------------------------------------------------------------------------------------------------------------------------------------------------------------------------------------------------------------------|---------------------|--------------|--------------|
| 263 | XLOC_001595 |                     | 3.153  | 0.01482  | 1.8292 | 0.2808 | High_Female - High_Male;<br>High_Female - Low_Female;<br>High_Female - Low_Male;<br>High_Female - Medium_Female;<br>High_Female - Medium_Male;<br>High_Male - Low_Female;<br>Low_Male - High_Male;<br>Medium_Female - High_Male;<br>Medium_Male - High_Male;<br>Low_Male - Low_Female;<br>Medium_Female - Low_Female;<br>Medium_Male - Low_Female;<br>Medium_Female - Low_Male;<br>Medium_Male - Low_Male;<br>Medium_Male - Medium_Female | linc TCONS_00003800 |              |              |
| 264 | PLAC8       | placenta-specific 8 | 3.1526 | 0.014829 | 1.8289 | 0.2808 | High_Female - High_Male;<br>Low_Female - High_Female;<br>Low_Male - High_Female;<br>Medium_Female - High_Female;<br>Medium_Male - High_Female;<br>Low_Female - High_Male;<br>Low_Male - High_Male;<br>Medium_Female - High_Male;<br>Medium_Male - High_Male;<br>Low_Female - Low_Male;<br>Low_Female - Medium_Female;<br>Medium_Male - Low_Female;<br>Low_Male - Medium_Female;<br>Medium_Male - Low_Male;<br>Medium_Male - Medium_Female | A_33_P3241989       | NM_001130715 | NM_001130715 |



|     |             |                                                           |        |          |        |         |                                                                                                                                                                                                                                                                                                                                                                                                                                           |                                             |           |           |
|-----|-------------|-----------------------------------------------------------|--------|----------|--------|---------|-------------------------------------------------------------------------------------------------------------------------------------------------------------------------------------------------------------------------------------------------------------------------------------------------------------------------------------------------------------------------------------------------------------------------------------------|---------------------------------------------|-----------|-----------|
| 265 | XLOC_004828 |                                                           | 3.1289 | 0.015402 | 1.8124 | 0.28946 | High_Male - High_Female;<br>Low_Female - High_Female;<br>Low_Male - High_Female;<br>Medium_Female - High_Female;<br>Medium_Male - High_Female;<br>Low_Female - High_Male;<br>Low_Male - High_Male;<br>High_Male - Medium_Female;<br>High_Male - Medium_Male;<br>Low_Female - Low_Male;<br>Low_Female - Medium_Female;<br>Low_Female - Medium_Male;<br>Low_Male - Medium_Female;<br>Low_Male - Medium_Male;<br>Medium_Female - Medium_Male | ens ENST00000504349 linc T<br>CONS_00009667 |           |           |
| 266 | ANKRD20A5P  | ankyrin repeat domain 20 family, member<br>A5, pseudogene | 3.1256 | 0.015483 | 1.8101 | 0.28946 | High_Female - High_Male;<br>High_Female - Low_Female;<br>High_Female - Low_Male;<br>High_Female - Medium_Female;<br>High_Female - Medium_Male;<br>High_Male - Low_Female;<br>Low_Male - High_Male;<br>High_Male - Medium_Female;<br>High_Male - Medium_Male;<br>Low_Male - Low_Female;<br>Low_Female - Medium_Female;<br>Medium_Male - Low_Female;<br>Low_Male - Medium_Female;<br>Low_Male - Medium_Male;<br>Medium_Male - Medium_Female | A_32_P68942                                 | NR_040113 | NR_040113 |

|     |                  |                                   |        |          |        |         |                                                                                                                                                                                                                                                                                                                                                                                                                                           |                     |              |              |
|-----|------------------|-----------------------------------|--------|----------|--------|---------|-------------------------------------------------------------------------------------------------------------------------------------------------------------------------------------------------------------------------------------------------------------------------------------------------------------------------------------------------------------------------------------------------------------------------------------------|---------------------|--------------|--------------|
| 267 | XLOC_007868      |                                   | 3.123  | 0.015547 | 1.8083 | 0.28946 | High_Male - High_Female;<br>Low_Female - High_Female;<br>Low_Male - High_Female;<br>Medium_Female - High_Female;<br>Medium_Male - High_Female;<br>Low_Female - High_Male;<br>High_Male - Low_Male;<br>Medium_Female - High_Male;<br>High_Male - Medium_Male;<br>Low_Female - Low_Male;<br>Medium_Female - Low_Female;<br>Low_Female - Medium_Male;<br>Medium_Female - Low_Male;<br>Low_Male - Medium_Male;<br>Medium_Female - Medium_Male | linc TCONS_00016491 |              |              |
| 268 | 3<br>LOC10065288 | arachidonate 15-lipoxygenase-like | 3.1209 | 0.015601 | 1.8068 | 0.28946 | High_Male - High_Female;<br>High_Female - Low_Female;<br>Low_Male - High_Female;<br>Medium_Female - High_Female;<br>Medium_Male - High_Female;<br>High_Male - Low_Female;<br>Low_Male - High_Male;<br>High_Male - Medium_Female;<br>Medium_Male - High_Male;<br>Low_Male - Low_Female;<br>Medium_Female - Low_Female;<br>Medium_Male - Low_Female;<br>Low_Male - Medium_Female;<br>Medium_Male - Low_Male;<br>Medium_Male - Medium_Female | A_21_P0014014       | XM_003403469 | XM_003403469 |

|     |             |                                                      |        |          |        |         |                                                                                                                                                                                                                                                                                                                                                                                                                                           |               |           |           |
|-----|-------------|------------------------------------------------------|--------|----------|--------|---------|-------------------------------------------------------------------------------------------------------------------------------------------------------------------------------------------------------------------------------------------------------------------------------------------------------------------------------------------------------------------------------------------------------------------------------------------|---------------|-----------|-----------|
| 269 | HS3ST1      | heparan sulfate (glucosamine) 3-O-sulfotransferase 1 | 3.1205 | 0.01561  | 1.8066 | 0.28946 | High_Female - High_Male;<br>Low_Female - High_Female;<br>Low_Male - High_Female;<br>Medium_Female - High_Female;<br>Medium_Male - High_Female;<br>Low_Female - High_Male;<br>Low_Male - High_Male;<br>Medium_Female - High_Male;<br>Medium_Male - High_Male;<br>Low_Male - Low_Female;<br>Medium_Female - Low_Female;<br>Medium_Male - Low_Female;<br>Low_Male - Medium_Female;<br>Medium_Male - Low_Male;<br>Medium_Male - Medium_Female | A_23_P121657  | NM_005114 | NM_005114 |
| 270 | XLOC_002125 |                                                      | 3.1196 | 0.015634 | 1.8059 | 0.28946 | High_Male - High_Female;<br>Low_Female - High_Female;<br>Low_Male - High_Female;<br>Medium_Female - High_Female;<br>Medium_Male - High_Female;<br>Low_Female - High_Male;<br>Low_Male - High_Male;<br>High_Male - Medium_Female;<br>Medium_Male - High_Male;<br>Low_Female - Low_Male;<br>Low_Female - Medium_Female;<br>Low_Female - Medium_Male;<br>Low_Male - Medium_Female;<br>Low_Male - Medium_Male;<br>Medium_Male - Medium_Female | A_21_P0002057 |           | AL355732  |

|     |                  |                        |        |          |        |         |                                                                                                                                                                                                                                                                                                                                                                                                                                           |               |              |              |
|-----|------------------|------------------------|--------|----------|--------|---------|-------------------------------------------------------------------------------------------------------------------------------------------------------------------------------------------------------------------------------------------------------------------------------------------------------------------------------------------------------------------------------------------------------------------------------------------|---------------|--------------|--------------|
| 271 | LOC10012921<br>6 | beta-defensin 131-like | 3.1093 | 0.015893 | 1.7988 | 0.29317 | High_Male - High_Female;<br>Low_Female - High_Female;<br>Low_Male - High_Female;<br>Medium_Female - High_Female;<br>High_Female - Medium_Male;<br>Low_Female - High_Male;<br>High_Male - Low_Male;<br>Medium_Female - High_Male;<br>High_Male - Medium_Male;<br>Low_Female - Low_Male;<br>Medium_Female - Low_Female;<br>Low_Female - Medium_Male;<br>Medium_Female - Low_Male;<br>Low_Male - Medium_Male;<br>Medium_Female - Medium_Male | A_33_P3255531 | NM_001242853 | NM_001242853 |
| 272 | FLOT2            | flotillin 2            | 3.1019 | 0.016083 | 1.7936 | 0.29513 | High_Female - High_Male;<br>High_Female - Low_Female;<br>High_Female - Low_Male;<br>High_Female - Medium_Female;<br>High_Female - Medium_Male;<br>High_Male - Low_Female;<br>High_Male - Low_Male;<br>Medium_Female - High_Male;<br>Medium_Male - High_Male;<br>Low_Female - Low_Male;<br>Medium_Female - Low_Female;<br>Medium_Male - Low_Female;<br>Medium_Female - Low_Male;<br>Medium_Male - Low_Male;<br>Medium_Female - Medium_Male | A_24_P253818  | NM_004475    | NM_004475    |

|     |          |                           |        |          |        |         |                                                                                                                                                                                                                                                                                                                                                                                                                                           |               |              |              |
|-----|----------|---------------------------|--------|----------|--------|---------|-------------------------------------------------------------------------------------------------------------------------------------------------------------------------------------------------------------------------------------------------------------------------------------------------------------------------------------------------------------------------------------------------------------------------------------------|---------------|--------------|--------------|
| 273 | C1orf140 | uncharacterized LOC400804 | 3.1006 | 0.016118 | 1.7927 | 0.29513 | High_Female - High_Male;<br>High_Female - Low_Female;<br>High_Female - Low_Male;<br>High_Female - Medium_Female;<br>High_Female - Medium_Male;<br>High_Male - Low_Female;<br>High_Male - Low_Male;<br>Medium_Female - High_Male;<br>Medium_Male - High_Male;<br>Low_Female - Low_Male;<br>Medium_Female - Low_Female;<br>Medium_Male - Low_Female;<br>Medium_Female - Low_Male;<br>Medium_Male - Low_Male;<br>Medium_Male - Medium_Female | A_33_P3295091 | NR_024236    | NR_024236    |
| 274 | DDHD2    | DDHD domain containing 2  | 3.0955 | 0.016249 | 1.7892 | 0.29646 | High_Female - High_Male;<br>Low_Female - High_Female;<br>Low_Male - High_Female;<br>Medium_Female - High_Female;<br>Medium_Male - High_Female;<br>Low_Female - High_Male;<br>Low_Male - High_Male;<br>Medium_Female - High_Male;<br>Medium_Male - High_Male;<br>Low_Male - Low_Female;<br>Low_Female - Medium_Female;<br>Medium_Male - Low_Female;<br>Low_Male - Medium_Female;<br>Low_Male - Medium_Male;<br>Medium_Male - Medium_Female | A_21_P0000039 | NM_001164234 | NM_001164234 |

|     |             |                                |        |          |        |         |                                                                                                                                                                                                                                                                                                                                                                                                                                           |               |              |              |
|-----|-------------|--------------------------------|--------|----------|--------|---------|-------------------------------------------------------------------------------------------------------------------------------------------------------------------------------------------------------------------------------------------------------------------------------------------------------------------------------------------------------------------------------------------------------------------------------------------|---------------|--------------|--------------|
| 275 | PNMA6C      | paraneoplastic antigen like 6C | 3.0918 | 0.016344 | 1.7866 | 0.29711 | High_Male - High_Female;<br>High_Female - Low_Female;<br>Low_Male - High_Female;<br>High_Female - Medium_Female;<br>Medium_Male - High_Female;<br>High_Male - Low_Female;<br>High_Male - Low_Male;<br>High_Male - Medium_Female;<br>Medium_Male - High_Male;<br>Low_Male - Low_Female;<br>Low_Female - Medium_Female;<br>Medium_Male - Low_Female;<br>Low_Male - Medium_Female;<br>Medium_Male - Low_Male;<br>Medium_Male - Medium_Female | A_33_P3233436 | NM_001170944 | NM_001170944 |
| 276 | XLOC_007219 |                                | 3.0824 | 0.016593 | 1.7801 | 0.3002  | High_Female - High_Male;<br>High_Female - Low_Female;<br>High_Female - Low_Male;<br>High_Female - Medium_Female;<br>High_Female - Medium_Male;<br>Low_Female - High_Male;<br>Low_Male - High_Male;<br>Medium_Female - High_Male;<br>High_Male - Medium_Male;<br>Low_Female - Low_Male;<br>Low_Female - Medium_Female;<br>Low_Female - Medium_Male;<br>Low_Male - Medium_Female;<br>Low_Male - Medium_Male;<br>Medium_Female - Medium_Male | A_21_P0005631 |              | BC014119     |

|     |                  |                              |        |          |        |        |                                                                                                                                                                                                                                                                                                                                                                                                                                           |                     |          |
|-----|------------------|------------------------------|--------|----------|--------|--------|-------------------------------------------------------------------------------------------------------------------------------------------------------------------------------------------------------------------------------------------------------------------------------------------------------------------------------------------------------------------------------------------------------------------------------------------|---------------------|----------|
| 277 | LOC10013182<br>0 | uncharacterized LOC100131820 | 3.0804 | 0.016647 | 1.7787 | 0.3002 | High_Female - High_Male;<br>Low_Female - High_Female;<br>Low_Male - High_Female;<br>High_Female - Medium_Female;<br>Medium_Male - High_Female;<br>Low_Female - High_Male;<br>Low_Male - High_Male;<br>Medium_Female - High_Male;<br>Medium_Male - High_Male;<br>Low_Female - Low_Male;<br>Low_Female - Medium_Female;<br>Low_Female - Medium_Male;<br>Low_Male - Medium_Female;<br>Medium_Male - Low_Male;<br>Medium_Male - Medium_Female | A_33_P3275630       | AK125613 |
| 278 | XLOC_011570      |                              | 3.0786 | 0.016695 | 1.7774 | 0.3002 | High_Male - High_Female;<br>Low_Female - High_Female;<br>Low_Male - High_Female;<br>Medium_Female - High_Female;<br>Medium_Male - High_Female;<br>Low_Female - High_Male;<br>Low_Male - High_Male;<br>Medium_Female - High_Male;<br>High_Male - Medium_Male;<br>Low_Female - Low_Male;<br>Low_Female - Medium_Female;<br>Low_Female - Medium_Male;<br>Low_Male - Medium_Female;<br>Low_Male - Medium_Male;<br>Medium_Female - Medium_Male | linc TCONS_00023775 |          |

|     |         |                          |        |          |        |        |                                                                                                                                                                                                                                                                                                                                                                                                                                           |               |              |              |
|-----|---------|--------------------------|--------|----------|--------|--------|-------------------------------------------------------------------------------------------------------------------------------------------------------------------------------------------------------------------------------------------------------------------------------------------------------------------------------------------------------------------------------------------------------------------------------------------|---------------|--------------|--------------|
| 279 |         |                          | 3.073  | 0.016845 | 1.7735 | 0.3018 | High_Male - High_Female;<br>Low_Female - High_Female;<br>Low_Male - High_Female;<br>Medium_Female - High_Female;<br>Medium_Male - High_Female;<br>High_Male - Low_Female;<br>Low_Male - High_Male;<br>Medium_Female - High_Male;<br>High_Male - Medium_Male;<br>Low_Male - Low_Female;<br>Medium_Female - Low_Female;<br>Low_Female - Medium_Male;<br>Low_Male - Medium_Female;<br>Low_Male - Medium_Male;<br>Medium_Female - Medium_Male | A_33_P3378354 |              | CR615161     |
| 280 | ANKRD36 | ankyrin repeat domain 36 | 3.0708 | 0.016904 | 1.772  | 0.3018 | High_Female - High_Male;<br>High_Female - Low_Female;<br>Low_Male - High_Female;<br>High_Female - Medium_Female;<br>High_Female - Medium_Male;<br>Low_Female - High_Male;<br>Low_Male - High_Male;<br>Medium_Female - High_Male;<br>Medium_Male - High_Male;<br>Low_Male - Low_Female;<br>Medium_Female - Low_Female;<br>Low_Female - Medium_Male;<br>Low_Male - Medium_Female;<br>Low_Male - Medium_Male;<br>Medium_Female - Medium_Male | A_21_P0011812 | NM_001164315 | NM_001164315 |



|     |             |         |        |          |        |         |                                                                                                                                                                                                                                                                                                                                                                                                                                           |                     |           |           |
|-----|-------------|---------|--------|----------|--------|---------|-------------------------------------------------------------------------------------------------------------------------------------------------------------------------------------------------------------------------------------------------------------------------------------------------------------------------------------------------------------------------------------------------------------------------------------------|---------------------|-----------|-----------|
| 281 | EPN2        | epsin 2 | 3.0647 | 0.017071 | 1.7677 | 0.3037  | High_Male - High_Female;<br>Low_Female - High_Female;<br>Low_Male - High_Female;<br>Medium_Female - High_Female;<br>Medium_Male - High_Female;<br>High_Male - Low_Female;<br>High_Male - Low_Male;<br>High_Male - Medium_Female;<br>Medium_Male - High_Male;<br>Low_Male - Low_Female;<br>Medium_Female - Low_Female;<br>Medium_Male - Low_Female;<br>Low_Male - Medium_Female;<br>Medium_Male - Low_Male;<br>Medium_Male - Medium_Female | A_23_P89310         | NM_014964 | NM_014964 |
| 282 | XLOC_009790 |         | 3.0598 | 0.017207 | 1.7643 | 0.30502 | High_Male - High_Female;<br>Low_Female - High_Female;<br>High_Female - Low_Male;<br>Medium_Female - High_Female;<br>High_Female - Medium_Male;<br>Low_Female - High_Male;<br>High_Male - Low_Male;<br>Medium_Female - High_Male;<br>High_Male - Medium_Male;<br>Low_Female - Low_Male;<br>Low_Female - Medium_Female;<br>Low_Female - Medium_Male;<br>Medium_Female - Low_Male;<br>Low_Male - Medium_Male;<br>Medium_Female - Medium_Male | linc TCONS_00020459 |           |           |

|     |             |                     |        |          |        |         |                                                                                                                                                                                                                                                                                                                                                                                                                                           |                     |              |              |
|-----|-------------|---------------------|--------|----------|--------|---------|-------------------------------------------------------------------------------------------------------------------------------------------------------------------------------------------------------------------------------------------------------------------------------------------------------------------------------------------------------------------------------------------------------------------------------------------|---------------------|--------------|--------------|
| 283 | XLOC_013445 |                     | 3.0555 | 0.017324 | 1.7614 | 0.30602 | High_Female - High_Male;<br>Low_Female - High_Female;<br>Low_Male - High_Female;<br>High_Female - Medium_Female;<br>Medium_Male - High_Female;<br>Low_Female - High_Male;<br>Low_Male - High_Male;<br>High_Male - Medium_Female;<br>Medium_Male - High_Male;<br>Low_Female - Low_Male;<br>Low_Female - Medium_Female;<br>Medium_Male - Low_Female;<br>Low_Male - Medium_Female;<br>Medium_Male - Low_Male;<br>Medium_Male - Medium_Female | linc TCONS_00028489 |              |              |
| 284 | ADCY4       | adenylate cyclase 4 | 3.0503 | 0.017469 | 1.7577 | 0.3075  | High_Male - High_Female;<br>Low_Female - High_Female;<br>Low_Male - High_Female;<br>Medium_Female - High_Female;<br>Medium_Male - High_Female;<br>Low_Female - High_Male;<br>Low_Male - High_Male;<br>Medium_Female - High_Male;<br>High_Male - Medium_Male;<br>Low_Male - Low_Female;<br>Medium_Female - Low_Female;<br>Low_Female - Medium_Male;<br>Low_Male - Medium_Female;<br>Low_Male - Medium_Male;<br>Medium_Female - Medium_Male | A_33_P3337161       | NM_001198568 | NM_001198568 |

|     |                    |                                                  |        |          |        |         |                                                                                                                                                                                                                                                                                                                                                                                                                                           |                                                                                             |           |           |
|-----|--------------------|--------------------------------------------------|--------|----------|--------|---------|-------------------------------------------------------------------------------------------------------------------------------------------------------------------------------------------------------------------------------------------------------------------------------------------------------------------------------------------------------------------------------------------------------------------------------------------|---------------------------------------------------------------------------------------------|-----------|-----------|
| 285 | PAQR6              | progesterin and adipoQ receptor family member VI | 3.0448 | 0.017625 | 1.7539 | 0.30915 | High_Female - High_Male;<br>High_Female - Low_Female;<br>High_Female - Low_Male;<br>High_Female - Medium_Female;<br>High_Female - Medium_Male;<br>High_Male - Low_Female;<br>High_Male - Low_Male;<br>Medium_Female - High_Male;<br>High_Male - Medium_Male;<br>Low_Female - Low_Male;<br>Medium_Female - Low_Female;<br>Medium_Male - Low_Female;<br>Medium_Female - Low_Male;<br>Medium_Male - Low_Male;<br>Medium_Female - Medium_Male | A_23_P97283                                                                                 | NM_024897 | NM_024897 |
| 286 | XLOC_I2_0139<br>63 |                                                  | 3.0388 | 0.017795 | 1.7497 | 0.31104 | High_Male - High_Female;<br>Low_Female - High_Female;<br>Low_Male - High_Female;<br>Medium_Female - High_Female;<br>Medium_Male - High_Female;<br>Low_Female - High_Male;<br>Low_Male - High_Male;<br>Medium_Female - High_Male;<br>High_Male - Medium_Male;<br>Low_Female - Low_Male;<br>Low_Female - Medium_Female;<br>Low_Female - Medium_Male;<br>Low_Male - Medium_Female;<br>Low_Male - Medium_Male;<br>Medium_Female - Medium_Male | ens ENST00000451962 tc TH<br>C2722577 linc TCONS_I2_000<br>26848 linc TCONS_I2_000268<br>47 |           |           |

|     |           |                                                                             |        |          |        |         |                                                                                                                                                                                                                                                                                                                                                                                                                                           |              |           |           |
|-----|-----------|-----------------------------------------------------------------------------|--------|----------|--------|---------|-------------------------------------------------------------------------------------------------------------------------------------------------------------------------------------------------------------------------------------------------------------------------------------------------------------------------------------------------------------------------------------------------------------------------------------------|--------------|-----------|-----------|
| 287 | SLC16A14  | solute carrier family 16, member 14<br>(monocarboxylic acid transporter 14) | 3.0228 | 0.018259 | 1.7385 | 0.31698 | High_Male - High_Female;<br>Low_Female - High_Female;<br>Low_Male - High_Female;<br>High_Female - Medium_Female;<br>Medium_Male - High_Female;<br>High_Male - Low_Female;<br>Low_Male - High_Male;<br>High_Male - Medium_Female;<br>Medium_Male - High_Male;<br>Low_Male - Low_Female;<br>Low_Female - Medium_Female;<br>Medium_Male - Low_Female;<br>Low_Male - Medium_Female;<br>Medium_Male - Low_Male;<br>Medium_Male - Medium_Female | A_24_P342829 | NM_152527 | NM_152527 |
| 288 | HNF1A-AS1 | HNF1A antisense RNA 1 (non-protein<br>coding)                               | 3.0202 | 0.018333 | 1.7368 | 0.31698 | High_Male - High_Female;<br>Low_Female - High_Female;<br>Low_Male - High_Female;<br>Medium_Female - High_Female;<br>Medium_Male - High_Female;<br>Low_Female - High_Male;<br>Low_Male - High_Male;<br>Medium_Female - High_Male;<br>High_Male - Medium_Male;<br>Low_Male - Low_Female;<br>Low_Female - Medium_Female;<br>Low_Female - Medium_Male;<br>Low_Male - Medium_Female;<br>Low_Male - Medium_Male;<br>Medium_Female - Medium_Male | A_24_P314515 | NR_024345 | NR_024345 |

|     |                    |                           |        |          |        |         |                                                                                                                                                                                                                                                                                                                                                                                                                                           |               |           |           |
|-----|--------------------|---------------------------|--------|----------|--------|---------|-------------------------------------------------------------------------------------------------------------------------------------------------------------------------------------------------------------------------------------------------------------------------------------------------------------------------------------------------------------------------------------------------------------------------------------------|---------------|-----------|-----------|
| 289 | TMEM164            | transmembrane protein 164 | 3.0181 | 0.018395 | 1.7353 | 0.31698 | High_Male - High_Female;<br>Low_Female - High_Female;<br>Low_Male - High_Female;<br>Medium_Female - High_Female;<br>Medium_Male - High_Female;<br>High_Male - Low_Female;<br>High_Male - Low_Male;<br>High_Male - Medium_Female;<br>High_Male - Medium_Male;<br>Low_Male - Low_Female;<br>Medium_Female - Low_Female;<br>Medium_Male - Low_Female;<br>Low_Male - Medium_Female;<br>Medium_Male - Low_Male;<br>Medium_Male - Medium_Female | A_23_P96041   | NM_032227 | NM_032227 |
| 290 | XLOC_I2_0010<br>85 |                           | 3.0166 | 0.018441 | 1.7342 | 0.31698 | High_Male - High_Female;<br>Low_Female - High_Female;<br>Low_Male - High_Female;<br>Medium_Female - High_Female;<br>Medium_Male - High_Female;<br>High_Male - Low_Female;<br>Low_Male - High_Male;<br>Medium_Female - High_Male;<br>Medium_Male - High_Male;<br>Low_Male - Low_Female;<br>Medium_Female - Low_Female;<br>Medium_Male - Low_Female;<br>Low_Male - Medium_Female;<br>Medium_Male - Low_Male;<br>Medium_Male - Medium_Female | A_21_P0010646 |           | AK090412  |

|     |             |          |        |          |        |         |                                                                                                                                                                                                                                                                                                                                                                                                                                           |                                                                          |           |           |
|-----|-------------|----------|--------|----------|--------|---------|-------------------------------------------------------------------------------------------------------------------------------------------------------------------------------------------------------------------------------------------------------------------------------------------------------------------------------------------------------------------------------------------------------------------------------------------|--------------------------------------------------------------------------|-----------|-----------|
| 291 | TNS1        | tensin 1 | 3.0152 | 0.018483 | 1.7332 | 0.31698 | High_Female - High_Male;<br>Low_Female - High_Female;<br>Low_Male - High_Female;<br>Medium_Female - High_Female;<br>High_Female - Medium_Male;<br>Low_Female - High_Male;<br>Low_Male - High_Male;<br>Medium_Female - High_Male;<br>Medium_Male - High_Male;<br>Low_Male - Low_Female;<br>Medium_Female - Low_Female;<br>Low_Female - Medium_Male;<br>Medium_Female - Low_Male;<br>Low_Male - Medium_Male;<br>Medium_Female - Medium_Male | A_33_P3738458                                                            | NM_022648 | NM_022648 |
| 292 | XLOC_004308 |          | 3.0083 | 0.018687 | 1.7285 | 0.31698 | High_Female - High_Male;<br>High_Female - Low_Female;<br>High_Female - Low_Male;<br>High_Female - Medium_Female;<br>High_Female - Medium_Male;<br>High_Male - Low_Female;<br>High_Male - Low_Male;<br>Medium_Female - High_Male;<br>High_Male - Medium_Male;<br>Low_Female - Low_Male;<br>Medium_Female - Low_Female;<br>Medium_Male - Low_Female;<br>Medium_Female - Low_Male;<br>Medium_Male - Low_Male;<br>Medium_Female - Medium_Male | ens ENST00000505844 ens ENST00000507730 ens ENST0000508677 tc THC2714968 |           |           |

|     |        |                                                        |        |          |        |         |                                                                                                                                                                                                                                                                                                                                                                                                                                           |               |           |           |
|-----|--------|--------------------------------------------------------|--------|----------|--------|---------|-------------------------------------------------------------------------------------------------------------------------------------------------------------------------------------------------------------------------------------------------------------------------------------------------------------------------------------------------------------------------------------------------------------------------------------------|---------------|-----------|-----------|
| 293 | RAB44  | RAB44, member RAS oncogene family                      | 3.0071 | 0.018722 | 1.7276 | 0.31698 | High_Male - High_Female;<br>High_Female - Low_Female;<br>Low_Male - High_Female;<br>Medium_Female - High_Female;<br>Medium_Male - High_Female;<br>High_Male - Low_Female;<br>High_Male - Low_Male;<br>High_Male - Medium_Female;<br>High_Male - Medium_Male;<br>Low_Male - Low_Female;<br>Medium_Female - Low_Female;<br>Medium_Male - Low_Female;<br>Low_Male - Medium_Female;<br>Medium_Male - Low_Male;<br>Medium_Male - Medium_Female | A_33_P3349912 |           | AK125083  |
| 294 | MFSD6L | major facilitator superfamily domain containing 6-like | 3.0002 | 0.018932 | 1.7228 | 0.31698 | High_Male - High_Female;<br>Low_Female - High_Female;<br>Low_Male - High_Female;<br>High_Female - Medium_Female;<br>Medium_Male - High_Female;<br>High_Male - Low_Female;<br>High_Male - Low_Male;<br>High_Male - Medium_Female;<br>Medium_Male - High_Male;<br>Low_Male - Low_Female;<br>Low_Female - Medium_Female;<br>Medium_Male - Low_Female;<br>Low_Male - Medium_Female;<br>Medium_Male - Low_Male;<br>Medium_Male - Medium_Female | A_33_P3393331 | NM_152599 | NM_152599 |

|     |             |                                                 |        |          |        |         |                                                                                                                                                                                                                                                                                                                                                                                                                                           |               |           |           |
|-----|-------------|-------------------------------------------------|--------|----------|--------|---------|-------------------------------------------------------------------------------------------------------------------------------------------------------------------------------------------------------------------------------------------------------------------------------------------------------------------------------------------------------------------------------------------------------------------------------------------|---------------|-----------|-----------|
| 295 | NR4A2       | nuclear receptor subfamily 4, group A, member 2 | 3.0001 | 0.018934 | 1.7227 | 0.31698 | High_Male - High_Female;<br>Low_Female - High_Female;<br>Low_Male - High_Female;<br>High_Female - Medium_Female;<br>Medium_Male - High_Female;<br>High_Male - Low_Female;<br>Low_Male - High_Male;<br>High_Male - Medium_Female;<br>High_Male - Medium_Male;<br>Low_Male - Low_Female;<br>Low_Female - Medium_Female;<br>Low_Female - Medium_Male;<br>Low_Male - Medium_Female;<br>Low_Male - Medium_Male;<br>Medium_Male - Medium_Female | A_23_P131208  | NM_006186 | NM_006186 |
| 296 | XLOC_011924 |                                                 | 2.9975 | 0.019014 | 1.7209 | 0.31698 | High_Male - High_Female;<br>Low_Female - High_Female;<br>Low_Male - High_Female;<br>Medium_Female - High_Female;<br>Medium_Male - High_Female;<br>Low_Female - High_Male;<br>Low_Male - High_Male;<br>High_Male - Medium_Female;<br>High_Male - Medium_Male;<br>Low_Male - Low_Female;<br>Low_Female - Medium_Female;<br>Low_Female - Medium_Male;<br>Low_Male - Medium_Female;<br>Low_Male - Medium_Male;<br>Medium_Female - Medium_Male | A_21_P0009023 |           | BI055436  |



|     |             |                                     |        |          |        |         |                                                                                                                                                                                                                                                                                                                                                                                                                                           |                     |           |           |
|-----|-------------|-------------------------------------|--------|----------|--------|---------|-------------------------------------------------------------------------------------------------------------------------------------------------------------------------------------------------------------------------------------------------------------------------------------------------------------------------------------------------------------------------------------------------------------------------------------------|---------------------|-----------|-----------|
| 297 | XLOC_007868 |                                     | 2.9962 | 0.019054 | 1.72   | 0.31698 | High_Male - High_Female;<br>Low_Female - High_Female;<br>Low_Male - High_Female;<br>Medium_Female - High_Female;<br>Medium_Male - High_Female;<br>Low_Female - High_Male;<br>Low_Male - High_Male;<br>Medium_Female - High_Male;<br>High_Male - Medium_Male;<br>Low_Male - Low_Female;<br>Low_Female - Medium_Female;<br>Low_Female - Medium_Male;<br>Low_Male - Medium_Female;<br>Low_Male - Medium_Male;<br>Medium_Female - Medium_Male | linc TCONS_00016491 |           |           |
| 298 | CNR2        | cannabinoid receptor 2 (macrophage) | 2.9928 | 0.019157 | 1.7177 | 0.31698 | High_Male - High_Female;<br>Low_Female - High_Female;<br>Low_Male - High_Female;<br>Medium_Female - High_Female;<br>Medium_Male - High_Female;<br>High_Male - Low_Female;<br>High_Male - Low_Male;<br>High_Male - Medium_Female;<br>Medium_Male - High_Male;<br>Low_Male - Low_Female;<br>Medium_Female - Low_Female;<br>Medium_Male - Low_Female;<br>Low_Male - Medium_Female;<br>Medium_Male - Low_Male;<br>Medium_Male - Medium_Female | A_23_P310931        | NM_001841 | NM_001841 |

|     |       |                                          |        |         |        |         |                                                                                                                                                                                                                                                                                                                                                                                                                                           |               |              |              |
|-----|-------|------------------------------------------|--------|---------|--------|---------|-------------------------------------------------------------------------------------------------------------------------------------------------------------------------------------------------------------------------------------------------------------------------------------------------------------------------------------------------------------------------------------------------------------------------------------------|---------------|--------------|--------------|
| 299 | PDK2  | pyruvate dehydrogenase kinase, isozyme 2 | 2.9924 | 0.01917 | 1.7174 | 0.31698 | High_Male - High_Female;<br>Low_Female - High_Female;<br>Low_Male - High_Female;<br>Medium_Female - High_Female;<br>Medium_Male - High_Female;<br>High_Male - Low_Female;<br>Low_Male - High_Male;<br>High_Male - Medium_Female;<br>High_Male - Medium_Male;<br>Low_Male - Low_Female;<br>Medium_Female - Low_Female;<br>Medium_Male - Low_Female;<br>Low_Male - Medium_Female;<br>Low_Male - Medium_Male;<br>Medium_Male - Medium_Female | A_21_P0000146 | NM_001199900 | NM_001199900 |
| 300 | OVGP1 | oviductal glycoprotein 1, 120kDa         | 2.9911 | 0.01921 | 1.7165 | 0.31698 | High_Female - High_Male;<br>Low_Female - High_Female;<br>Low_Male - High_Female;<br>High_Female - Medium_Female;<br>Medium_Male - High_Female;<br>Low_Female - High_Male;<br>Low_Male - High_Male;<br>High_Male - Medium_Female;<br>Medium_Male - High_Male;<br>Low_Male - Low_Female;<br>Low_Female - Medium_Female;<br>Low_Female - Medium_Male;<br>Low_Male - Medium_Female;<br>Low_Male - Medium_Male;<br>Medium_Male - Medium_Female | A_23_P103756  | NM_002557    | NM_002557    |

|     |      |                                       |        |          |        |         |                                                                                                                                                                                                                                                                                                                                                                                                                                           |               |           |           |
|-----|------|---------------------------------------|--------|----------|--------|---------|-------------------------------------------------------------------------------------------------------------------------------------------------------------------------------------------------------------------------------------------------------------------------------------------------------------------------------------------------------------------------------------------------------------------------------------------|---------------|-----------|-----------|
| 301 | CD69 | CD69 molecule                         | 2.9888 | 0.019281 | 1.7149 | 0.31698 | High_Male - High_Female;<br>Low_Female - High_Female;<br>Low_Male - High_Female;<br>Medium_Female - High_Female;<br>Medium_Male - High_Female;<br>High_Male - Low_Female;<br>Low_Male - High_Male;<br>High_Male - Medium_Female;<br>High_Male - Medium_Male;<br>Low_Male - Low_Female;<br>Low_Female - Medium_Female;<br>Medium_Male - Low_Female;<br>Low_Male - Medium_Female;<br>Low_Male - Medium_Male;<br>Medium_Male - Medium_Female | A_33_P3241021 |           | AK303383  |
| 302 | WNK4 | WNK lysine deficient protein kinase 4 | 2.9883 | 0.019297 | 1.7145 | 0.31698 | High_Male - High_Female;<br>Low_Female - High_Female;<br>Low_Male - High_Female;<br>Medium_Female - High_Female;<br>Medium_Male - High_Female;<br>Low_Female - High_Male;<br>Low_Male - High_Male;<br>High_Male - Medium_Female;<br>High_Male - Medium_Male;<br>Low_Female - Low_Male;<br>Low_Female - Medium_Female;<br>Low_Female - Medium_Male;<br>Low_Male - Medium_Female;<br>Low_Male - Medium_Male;<br>Medium_Female - Medium_Male | A_33_P3377994 | NM_032387 | NM_032387 |

|     |       |                        |        |          |        |         |                                                                                                                                                                                                                                                                                                                                                                                                                                           |              |           |           |
|-----|-------|------------------------|--------|----------|--------|---------|-------------------------------------------------------------------------------------------------------------------------------------------------------------------------------------------------------------------------------------------------------------------------------------------------------------------------------------------------------------------------------------------------------------------------------------------|--------------|-----------|-----------|
| 303 | OLFM4 | olfactomedin 4         | 2.9875 | 0.01932  | 1.714  | 0.31698 | High_Female - High_Male;<br>High_Female - Low_Female;<br>High_Female - Low_Male;<br>Medium_Female - High_Female;<br>High_Female - Medium_Male;<br>High_Male - Low_Female;<br>High_Male - Low_Male;<br>Medium_Female - High_Male;<br>Medium_Male - High_Male;<br>Low_Male - Low_Female;<br>Medium_Female - Low_Female;<br>Medium_Male - Low_Female;<br>Medium_Female - Low_Male;<br>Medium_Male - Low_Male;<br>Medium_Female - Medium_Male | A_24_P181254 | NM_006418 | NM_006418 |
| 304 | DPP6  | dipeptidyl-peptidase 6 | 2.9868 | 0.019343 | 1.7135 | 0.31698 | High_Male - High_Female;<br>Low_Female - High_Female;<br>Low_Male - High_Female;<br>Medium_Female - High_Female;<br>Medium_Male - High_Female;<br>Low_Female - High_Male;<br>High_Male - Low_Male;<br>High_Male - Medium_Female;<br>High_Male - Medium_Male;<br>Low_Female - Low_Male;<br>Low_Female - Medium_Female;<br>Low_Female - Medium_Male;<br>Medium_Female - Low_Male;<br>Low_Male - Medium_Male;<br>Medium_Female - Medium_Male | A_24_P59111  |           | BC035912  |

|     |             |                            |        |          |        |         |                                                                                                                                                                                                                                                                                                                                                                                                                                           |                                             |           |           |
|-----|-------------|----------------------------|--------|----------|--------|---------|-------------------------------------------------------------------------------------------------------------------------------------------------------------------------------------------------------------------------------------------------------------------------------------------------------------------------------------------------------------------------------------------------------------------------------------------|---------------------------------------------|-----------|-----------|
| 305 | XLOC_004535 |                            | 2.9837 | 0.01944  | 1.7113 | 0.31698 | High_Male - High_Female;<br>Low_Female - High_Female;<br>Low_Male - High_Female;<br>Medium_Female - High_Female;<br>Medium_Male - High_Female;<br>Low_Female - High_Male;<br>High_Male - Low_Male;<br>High_Male - Medium_Female;<br>High_Male - Medium_Male;<br>Low_Female - Low_Male;<br>Low_Female - Medium_Female;<br>Low_Female - Medium_Male;<br>Low_Male - Medium_Female;<br>Low_Male - Medium_Male;<br>Medium_Female - Medium_Male | ens ENST00000509456 linc T<br>CONS_00009501 |           |           |
| 306 | COL20A1     | collagen, type XX, alpha 1 | 2.9826 | 0.019473 | 1.7106 | 0.31698 | High_Female - High_Male;<br>High_Female - Low_Female;<br>High_Female - Low_Male;<br>High_Female - Medium_Female;<br>High_Female - Medium_Male;<br>Low_Female - High_Male;<br>High_Male - Low_Male;<br>Medium_Female - High_Male;<br>Medium_Male - High_Male;<br>Low_Female - Low_Male;<br>Medium_Female - Low_Female;<br>Medium_Male - Low_Female;<br>Medium_Female - Low_Male;<br>Medium_Male - Low_Male;<br>Medium_Male - Medium_Female | A_33_P3395952                               | NM_020882 | NM_020882 |

|     |        |                                         |        |          |        |         |                                                                                                                                                                                                                                                                                                                                                                                                                                           |               |           |           |
|-----|--------|-----------------------------------------|--------|----------|--------|---------|-------------------------------------------------------------------------------------------------------------------------------------------------------------------------------------------------------------------------------------------------------------------------------------------------------------------------------------------------------------------------------------------------------------------------------------------|---------------|-----------|-----------|
| 307 | ALPL   | alkaline phosphatase, liver/bone/kidney | 2.9818 | 0.019499 | 1.71   | 0.31698 | High_Female - High_Male;<br>High_Female - Low_Female;<br>High_Female - Low_Male;<br>High_Female - Medium_Female;<br>High_Female - Medium_Male;<br>High_Male - Low_Female;<br>High_Male - Low_Male;<br>Medium_Female - High_Male;<br>Medium_Male - High_Male;<br>Low_Female - Low_Male;<br>Medium_Female - Low_Female;<br>Medium_Male - Low_Female;<br>Medium_Female - Low_Male;<br>Medium_Male - Low_Male;<br>Medium_Female - Medium_Male | A_24_P353619  | NM_000478 | NM_000478 |
| 308 | PSPHP1 | phosphoserine phosphatase pseudogene 1  | 2.9808 | 0.01953  | 1.7093 | 0.31698 | High_Male - High_Female;<br>High_Female - Low_Female;<br>High_Female - Low_Male;<br>Medium_Female - High_Female;<br>Medium_Male - High_Female;<br>High_Male - Low_Female;<br>High_Male - Low_Male;<br>Medium_Female - High_Male;<br>Medium_Male - High_Male;<br>Low_Male - Low_Female;<br>Medium_Female - Low_Female;<br>Medium_Male - Low_Female;<br>Medium_Female - Low_Male;<br>Medium_Male - Low_Male;<br>Medium_Female - Medium_Male | A_21_P0013198 |           | BC065228  |

|     |           |                                        |        |          |       |         |                                                                                                                                                                                                                                                                                                                                                                                                                                           |               |           |           |
|-----|-----------|----------------------------------------|--------|----------|-------|---------|-------------------------------------------------------------------------------------------------------------------------------------------------------------------------------------------------------------------------------------------------------------------------------------------------------------------------------------------------------------------------------------------------------------------------------------------|---------------|-----------|-----------|
| 309 | GGT8P     | gamma-glutamyltransferase 8 pseudogene | 2.9717 | 0.019817 | 1.703 | 0.31932 | High_Female - High_Male;<br>Low_Female - High_Female;<br>Low_Male - High_Female;<br>High_Female - Medium_Female;<br>Medium_Male - High_Female;<br>Low_Female - High_Male;<br>Low_Male - High_Male;<br>Medium_Female - High_Male;<br>Medium_Male - High_Male;<br>Low_Male - Low_Female;<br>Low_Female - Medium_Female;<br>Medium_Male - Low_Female;<br>Low_Male - Medium_Female;<br>Low_Male - Medium_Male;<br>Medium_Male - Medium_Female | A_24_P375322  | NR_003503 | NR_003503 |
| 310 | KRTAP19-2 | keratin associated protein 19-2        | 2.9704 | 0.019861 | 1.702 | 0.31932 | High_Female - High_Male;<br>High_Female - Low_Female;<br>Low_Male - High_Female;<br>Medium_Female - High_Female;<br>High_Female - Medium_Male;<br>Low_Female - High_Male;<br>Low_Male - High_Male;<br>Medium_Female - High_Male;<br>High_Male - Medium_Male;<br>Low_Male - Low_Female;<br>Medium_Female - Low_Female;<br>Low_Female - Medium_Male;<br>Medium_Female - Low_Male;<br>Low_Male - Medium_Male;<br>Medium_Female - Medium_Male | A_33_P3311267 | NM_181608 | NM_181608 |

|     |          |                                    |        |          |        |         |                                                                                                                                                                                                                                                                                                                                                                                                                                           |               |           |           |
|-----|----------|------------------------------------|--------|----------|--------|---------|-------------------------------------------------------------------------------------------------------------------------------------------------------------------------------------------------------------------------------------------------------------------------------------------------------------------------------------------------------------------------------------------------------------------------------------------|---------------|-----------|-----------|
| 311 |          |                                    | 2.9702 | 0.019866 | 1.7019 | 0.31932 | High_Female - High_Male;<br>High_Female - Low_Female;<br>High_Female - Low_Male;<br>High_Female - Medium_Female;<br>High_Female - Medium_Male;<br>High_Male - Low_Female;<br>High_Male - Low_Male;<br>Medium_Female - High_Male;<br>High_Male - Medium_Male;<br>Low_Female - Low_Male;<br>Medium_Female - Low_Female;<br>Low_Female - Medium_Male;<br>Medium_Female - Low_Male;<br>Low_Male - Medium_Male;<br>Medium_Female - Medium_Male | tc THC2739199 |           |           |
| 312 | CCDC144A | coiled-coil domain containing 144A | 2.9666 | 0.019982 | 1.6994 | 0.32016 | High_Male - High_Female;<br>Low_Female - High_Female;<br>Low_Male - High_Female;<br>Medium_Female - High_Female;<br>Medium_Male - High_Female;<br>Low_Female - High_Male;<br>Low_Male - High_Male;<br>Medium_Female - High_Male;<br>Medium_Male - High_Male;<br>Low_Male - Low_Female;<br>Medium_Female - Low_Female;<br>Medium_Male - Low_Female;<br>Low_Male - Medium_Female;<br>Low_Male - Medium_Male;<br>Medium_Female - Medium_Male | A_21_P0011525 | NM_014695 | NM_014695 |



|     |    |                                             |        |          |        |         |                                                                                                                                                                                                                                                                                                                                                                                                                                           |                        |           |           |
|-----|----|---------------------------------------------|--------|----------|--------|---------|-------------------------------------------------------------------------------------------------------------------------------------------------------------------------------------------------------------------------------------------------------------------------------------------------------------------------------------------------------------------------------------------------------------------------------------------|------------------------|-----------|-----------|
| 313 | 7  | LOC10013298<br>uncharacterized LOC100132987 | 2.9631 | 0.020093 | 1.697  | 0.32082 | High_Male - High_Female;<br>Low_Female - High_Female;<br>Low_Male - High_Female;<br>Medium_Female - High_Female;<br>Medium_Male - High_Female;<br>High_Male - Low_Female;<br>Low_Male - High_Male;<br>High_Male - Medium_Female;<br>High_Male - Medium_Male;<br>Low_Male - Low_Female;<br>Medium_Female - Low_Female;<br>Low_Female - Medium_Male;<br>Low_Male - Medium_Female;<br>Low_Male - Medium_Male;<br>Medium_Female - Medium_Male | A_21_P0000862          | NR_038985 | NR_038985 |
| 314 | 63 | XLOC_I2_0139                                | 2.9613 | 0.020152 | 1.6957 | 0.32082 | High_Male - High_Female;<br>Low_Female - High_Female;<br>Low_Male - High_Female;<br>Medium_Female - High_Female;<br>Medium_Male - High_Female;<br>Low_Female - High_Male;<br>High_Male - Low_Male;<br>Medium_Female - High_Male;<br>High_Male - Medium_Male;<br>Low_Female - Low_Male;<br>Medium_Female - Low_Female;<br>Low_Female - Medium_Male;<br>Medium_Female - Low_Male;<br>Low_Male - Medium_Male;<br>Medium_Female - Medium_Male | linc TCONS_I2_00026845 |           |           |

|     |           |                           |        |          |        |         |                                                                                                                                                                                                                                                                                                                                                                                                                                           |               |           |           |
|-----|-----------|---------------------------|--------|----------|--------|---------|-------------------------------------------------------------------------------------------------------------------------------------------------------------------------------------------------------------------------------------------------------------------------------------------------------------------------------------------------------------------------------------------------------------------------------------------|---------------|-----------|-----------|
| 315 | ACOT11    | acyl-CoA thioesterase 11  | 2.9565 | 0.020309 | 1.6923 | 0.32229 | High_Male - High_Female;<br>High_Female - Low_Female;<br>Low_Male - High_Female;<br>Medium_Female - High_Female;<br>Medium_Male - High_Female;<br>High_Male - Low_Female;<br>High_Male - Low_Male;<br>High_Male - Medium_Female;<br>High_Male - Medium_Male;<br>Low_Male - Low_Female;<br>Medium_Female - Low_Female;<br>Medium_Male - Low_Female;<br>Medium_Female - Low_Male;<br>Medium_Male - Low_Male;<br>Medium_Male - Medium_Female | A_23_P417415  | NM_147161 | NM_147161 |
| 316 | LOC339807 | uncharacterized LOC339807 | 2.9452 | 0.020679 | 1.6845 | 0.32713 | High_Male - High_Female;<br>Low_Female - High_Female;<br>Low_Male - High_Female;<br>Medium_Female - High_Female;<br>High_Female - Medium_Male;<br>Low_Female - High_Male;<br>Low_Male - High_Male;<br>High_Male - Medium_Female;<br>High_Male - Medium_Male;<br>Low_Female - Low_Male;<br>Low_Female - Medium_Female;<br>Low_Female - Medium_Male;<br>Low_Male - Medium_Female;<br>Low_Male - Medium_Male;<br>Medium_Female - Medium_Male | A_33_P3512350 | NR_034023 | NR_034023 |

|     |       |                                                |        |          |        |         |                                                                                                                                                                                                                                                                                                                                                                                                                                           |               |           |           |
|-----|-------|------------------------------------------------|--------|----------|--------|---------|-------------------------------------------------------------------------------------------------------------------------------------------------------------------------------------------------------------------------------------------------------------------------------------------------------------------------------------------------------------------------------------------------------------------------------------------|---------------|-----------|-----------|
| 317 |       |                                                | 2.9398 | 0.02086  | 1.6807 | 0.32895 | High_Male - High_Female;<br>Low_Female - High_Female;<br>Low_Male - High_Female;<br>Medium_Female - High_Female;<br>Medium_Male - High_Female;<br>Low_Female - High_Male;<br>Low_Male - High_Male;<br>Medium_Female - High_Male;<br>High_Male - Medium_Male;<br>Low_Male - Low_Female;<br>Low_Female - Medium_Female;<br>Low_Female - Medium_Male;<br>Low_Male - Medium_Female;<br>Low_Male - Medium_Male;<br>Medium_Female - Medium_Male | A_33_P3369266 |           | CR997556  |
| 318 | OLIG2 | oligodendrocyte lineage transcription factor 2 | 2.9358 | 0.020995 | 1.6779 | 0.3294  | High_Male - High_Female;<br>Low_Female - High_Female;<br>Low_Male - High_Female;<br>Medium_Female - High_Female;<br>Medium_Male - High_Female;<br>High_Male - Low_Female;<br>High_Male - Low_Male;<br>High_Male - Medium_Female;<br>Medium_Male - High_Male;<br>Low_Male - Low_Female;<br>Medium_Female - Low_Female;<br>Medium_Male - Low_Female;<br>Medium_Female - Low_Male;<br>Medium_Male - Low_Male;<br>Medium_Male - Medium_Female | A_23_P211079  | NM_005806 | NM_005806 |

|     |             |                                           |        |          |        |        |                                                                                                                                                                                                                                                                                                                                                                                                                                           |               |           |           |
|-----|-------------|-------------------------------------------|--------|----------|--------|--------|-------------------------------------------------------------------------------------------------------------------------------------------------------------------------------------------------------------------------------------------------------------------------------------------------------------------------------------------------------------------------------------------------------------------------------------------|---------------|-----------|-----------|
| 319 | LPCAT2      | lysophosphatidylcholine acyltransferase 2 | 2.9319 | 0.021125 | 1.6752 | 0.3294 | High_Male - High_Female;<br>High_Female - Low_Female;<br>High_Female - Low_Male;<br>High_Female - Medium_Female;<br>High_Female - Medium_Male;<br>High_Male - Low_Female;<br>High_Male - Low_Male;<br>High_Male - Medium_Female;<br>High_Male - Medium_Male;<br>Low_Female - Low_Male;<br>Medium_Female - Low_Female;<br>Medium_Male - Low_Female;<br>Medium_Female - Low_Male;<br>Medium_Male - Low_Male;<br>Medium_Male - Medium_Female | A_23_P141021  | NM_017839 | NM_017839 |
| 320 | XLOC_007268 |                                           | 2.931  | 0.021156 | 1.6746 | 0.3294 | High_Male - High_Female;<br>Low_Female - High_Female;<br>High_Female - Low_Male;<br>Medium_Female - High_Female;<br>High_Female - Medium_Male;<br>Low_Female - High_Male;<br>High_Male - Low_Male;<br>Medium_Female - High_Male;<br>High_Male - Medium_Male;<br>Low_Female - Low_Male;<br>Low_Female - Medium_Female;<br>Low_Female - Medium_Male;<br>Medium_Female - Low_Male;<br>Medium_Male - Low_Male;<br>Medium_Female - Medium_Male | A_21_P0005997 |           | BC041456  |

|     |       |                                        |        |          |        |        |                                                                                                                                                                                                                                                                                                                                                                                                                                           |               |          |
|-----|-------|----------------------------------------|--------|----------|--------|--------|-------------------------------------------------------------------------------------------------------------------------------------------------------------------------------------------------------------------------------------------------------------------------------------------------------------------------------------------------------------------------------------------------------------------------------------------|---------------|----------|
| 321 | NAMPT | nicotinamide phosphoribosyltransferase | 2.9302 | 0.021183 | 1.674  | 0.3294 | High_Female - High_Male;<br>Low_Female - High_Female;<br>Low_Male - High_Female;<br>High_Female - Medium_Female;<br>Medium_Male - High_Female;<br>Low_Female - High_Male;<br>Low_Male - High_Male;<br>High_Male - Medium_Female;<br>Medium_Male - High_Male;<br>Low_Male - Low_Female;<br>Low_Female - Medium_Female;<br>Low_Female - Medium_Male;<br>Low_Male - Medium_Female;<br>Low_Male - Medium_Male;<br>Medium_Male - Medium_Female | A_33_P3364869 | AK023341 |
| 322 |       |                                        | 2.9292 | 0.021217 | 1.6733 | 0.3294 | High_Male - High_Female;<br>Low_Female - High_Female;<br>Low_Male - High_Female;<br>Medium_Female - High_Female;<br>Medium_Male - High_Female;<br>High_Male - Low_Female;<br>Low_Male - High_Male;<br>High_Male - Medium_Female;<br>High_Male - Medium_Male;<br>Low_Male - Low_Female;<br>Medium_Female - Low_Female;<br>Low_Female - Medium_Male;<br>Low_Male - Medium_Female;<br>Low_Male - Medium_Male;<br>Medium_Female - Medium_Male | A_24_P281636  | AY010113 |

|     |          |                                                    |        |          |        |         |                                                                                                                                                                                                                                                                                                                                                                                                                                           |               |           |           |
|-----|----------|----------------------------------------------------|--------|----------|--------|---------|-------------------------------------------------------------------------------------------------------------------------------------------------------------------------------------------------------------------------------------------------------------------------------------------------------------------------------------------------------------------------------------------------------------------------------------------|---------------|-----------|-----------|
| 323 | C19orf59 | chromosome 19 open reading frame 59                | 2.9233 | 0.021419 | 1.6692 | 0.32964 | High_Female - High_Male;<br>High_Female - Low_Female;<br>High_Female - Low_Male;<br>High_Female - Medium_Female;<br>High_Female - Medium_Male;<br>High_Male - Low_Female;<br>High_Male - Low_Male;<br>Medium_Female - High_Male;<br>Medium_Male - High_Male;<br>Low_Female - Low_Male;<br>Medium_Female - Low_Female;<br>Medium_Male - Low_Female;<br>Medium_Female - Low_Male;<br>Medium_Male - Low_Male;<br>Medium_Female - Medium_Male | A_23_P330561  | NM_174918 | NM_174918 |
| 324 | ABCD4    | ATP-binding cassette, sub-family D (ALD), member 4 | 2.9233 | 0.02142  | 1.6692 | 0.32964 | High_Male - High_Female;<br>Low_Female - High_Female;<br>Low_Male - High_Female;<br>Medium_Female - High_Female;<br>Medium_Male - High_Female;<br>Low_Female - High_Male;<br>High_Male - Low_Male;<br>Medium_Female - High_Male;<br>High_Male - Medium_Male;<br>Low_Female - Low_Male;<br>Low_Female - Medium_Female;<br>Low_Female - Medium_Male;<br>Medium_Female - Low_Male;<br>Low_Male - Medium_Male;<br>Medium_Female - Medium_Male | A_33_P3399598 |           | AK125109  |

|     |       |                                                           |        |          |        |         |                                                                                                                                                                                                                                                                                                                                                                                                                                           |               |           |           |
|-----|-------|-----------------------------------------------------------|--------|----------|--------|---------|-------------------------------------------------------------------------------------------------------------------------------------------------------------------------------------------------------------------------------------------------------------------------------------------------------------------------------------------------------------------------------------------------------------------------------------------|---------------|-----------|-----------|
| 325 |       |                                                           | 2.9179 | 0.021608 | 1.6654 | 0.32964 | High_Male - High_Female;<br>Low_Female - High_Female;<br>Low_Male - High_Female;<br>Medium_Female - High_Female;<br>Medium_Male - High_Female;<br>Low_Female - High_Male;<br>Low_Male - High_Male;<br>High_Male - Medium_Female;<br>High_Male - Medium_Male;<br>Low_Male - Low_Female;<br>Low_Female - Medium_Female;<br>Low_Female - Medium_Male;<br>Low_Male - Medium_Female;<br>Low_Male - Medium_Male;<br>Medium_Female - Medium_Male | A_33_P3415648 | XR_132817 | XR_132817 |
| 326 | KCNG1 | potassium voltage-gated channel,<br>subfamily G, member 1 | 2.9177 | 0.021615 | 1.6652 | 0.32964 | High_Male - High_Female;<br>Low_Female - High_Female;<br>Low_Male - High_Female;<br>Medium_Female - High_Female;<br>Medium_Male - High_Female;<br>Low_Female - High_Male;<br>Low_Male - High_Male;<br>Medium_Female - High_Male;<br>Medium_Male - High_Male;<br>Low_Male - Low_Female;<br>Low_Female - Medium_Female;<br>Medium_Male - Low_Female;<br>Low_Male - Medium_Female;<br>Medium_Male - Low_Male;<br>Medium_Male - Medium_Female | A_23_P210581  | NM_002237 | NM_002237 |

|     |             |                        |        |          |        |         |                                                                                                                                                                                                                                                                                                                                                                                                                                           |                                                                           |              |              |
|-----|-------------|------------------------|--------|----------|--------|---------|-------------------------------------------------------------------------------------------------------------------------------------------------------------------------------------------------------------------------------------------------------------------------------------------------------------------------------------------------------------------------------------------------------------------------------------------|---------------------------------------------------------------------------|--------------|--------------|
| 327 | ZNRF3       | zinc and ring finger 3 | 2.9176 | 0.021616 | 1.6652 | 0.32964 | High_Male - High_Female;<br>Low_Female - High_Female;<br>Low_Male - High_Female;<br>Medium_Female - High_Female;<br>Medium_Male - High_Female;<br>High_Male - Low_Female;<br>High_Male - Low_Male;<br>High_Male - Medium_Female;<br>High_Male - Medium_Male;<br>Low_Male - Low_Female;<br>Medium_Female - Low_Female;<br>Medium_Male - Low_Female;<br>Low_Male - Medium_Female;<br>Medium_Male - Low_Male;<br>Medium_Male - Medium_Female | A_24_P162373                                                              | NM_001206998 | NM_001206998 |
| 328 | XLOC_003405 |                        | 2.9126 | 0.02179  | 1.6617 | 0.32964 | High_Female - High_Male;<br>Low_Female - High_Female;<br>Low_Male - High_Female;<br>High_Female - Medium_Female;<br>Medium_Male - High_Female;<br>Low_Female - High_Male;<br>Low_Male - High_Male;<br>Medium_Female - High_Male;<br>Medium_Male - High_Male;<br>Low_Female - Low_Male;<br>Low_Female - Medium_Female;<br>Medium_Male - Low_Female;<br>Low_Male - Medium_Female;<br>Medium_Male - Low_Male;<br>Medium_Male - Medium_Female | tc THC2503819 linc TCONS_00006771 linc TCONS_00006770 linc TCONS_00007353 |              |              |



|     |       |                                                                 |        |          |        |         |                                                                                                                                                                                                                                                                                                                                                                                                                                           |               |          |
|-----|-------|-----------------------------------------------------------------|--------|----------|--------|---------|-------------------------------------------------------------------------------------------------------------------------------------------------------------------------------------------------------------------------------------------------------------------------------------------------------------------------------------------------------------------------------------------------------------------------------------------|---------------|----------|
| 329 | APBA2 | amyloid beta (A4) precursor protein-binding, family A, member 2 | 2.9122 | 0.021805 | 1.6614 | 0.32964 | High_Male - High_Female;<br>Low_Female - High_Female;<br>Low_Male - High_Female;<br>Medium_Female - High_Female;<br>Medium_Male - High_Female;<br>Low_Female - High_Male;<br>Low_Male - High_Male;<br>Medium_Female - High_Male;<br>Medium_Male - High_Male;<br>Low_Male - Low_Female;<br>Low_Female - Medium_Female;<br>Low_Female - Medium_Male;<br>Low_Male - Medium_Female;<br>Low_Male - Medium_Male;<br>Medium_Male - Medium_Female | A_33_P3344504 | AK124794 |
| 330 |       |                                                                 | 2.9103 | 0.02187  | 1.6601 | 0.32964 | High_Male - High_Female;<br>Low_Female - High_Female;<br>Low_Male - High_Female;<br>Medium_Female - High_Female;<br>High_Female - Medium_Male;<br>Low_Female - High_Male;<br>Low_Male - High_Male;<br>Medium_Female - High_Male;<br>High_Male - Medium_Male;<br>Low_Female - Low_Male;<br>Low_Female - Medium_Female;<br>Low_Female - Medium_Male;<br>Medium_Female - Low_Male;<br>Low_Male - Medium_Male;<br>Medium_Female - Medium_Male | A_33_P3322103 |          |

|     |             |                                                       |        |          |        |         |                                                                                                                                                                                                                                                                                                                                                                                                                                           |                     |              |              |
|-----|-------------|-------------------------------------------------------|--------|----------|--------|---------|-------------------------------------------------------------------------------------------------------------------------------------------------------------------------------------------------------------------------------------------------------------------------------------------------------------------------------------------------------------------------------------------------------------------------------------------|---------------------|--------------|--------------|
| 331 | XLOC_000535 |                                                       | 2.9099 | 0.021886 | 1.6598 | 0.32964 | High_Male - High_Female;<br>Low_Female - High_Female;<br>Low_Male - High_Female;<br>Medium_Female - High_Female;<br>Medium_Male - High_Female;<br>High_Male - Low_Female;<br>Low_Male - High_Male;<br>High_Male - Medium_Female;<br>High_Male - Medium_Male;<br>Low_Male - Low_Female;<br>Medium_Female - Low_Female;<br>Low_Female - Medium_Male;<br>Low_Male - Medium_Female;<br>Low_Male - Medium_Male;<br>Medium_Female - Medium_Male | linc TCONS_00001250 |              |              |
| 332 | FCGR1B      | Fc fragment of IgG, high affinity Ib, receptor (CD64) | 2.9097 | 0.021892 | 1.6597 | 0.32964 | High_Male - High_Female;<br>Low_Female - High_Female;<br>High_Female - Low_Male;<br>High_Female - Medium_Female;<br>High_Female - Medium_Male;<br>Low_Female - High_Male;<br>High_Male - Low_Male;<br>High_Male - Medium_Female;<br>High_Male - Medium_Male;<br>Low_Female - Low_Male;<br>Low_Female - Medium_Female;<br>Low_Female - Medium_Male;<br>Medium_Female - Low_Male;<br>Medium_Male - Low_Male;<br>Medium_Female - Medium_Male | A_23_P63390         | NM_001017986 | NM_001017986 |

|     |             |                        |        |          |        |         |                                                                                                                                                                                                                                                                                                                                                                                                                                           |                     |           |           |
|-----|-------------|------------------------|--------|----------|--------|---------|-------------------------------------------------------------------------------------------------------------------------------------------------------------------------------------------------------------------------------------------------------------------------------------------------------------------------------------------------------------------------------------------------------------------------------------------|---------------------|-----------|-----------|
| 333 | XLOC_007895 |                        | 2.9037 | 0.022105 | 1.6555 | 0.33184 | High_Male - High_Female;<br>Low_Female - High_Female;<br>Low_Male - High_Female;<br>Medium_Female - High_Female;<br>Medium_Male - High_Female;<br>Low_Female - High_Male;<br>Low_Male - High_Male;<br>High_Male - Medium_Female;<br>High_Male - Medium_Male;<br>Low_Male - Low_Female;<br>Low_Female - Medium_Female;<br>Low_Female - Medium_Male;<br>Low_Male - Medium_Female;<br>Low_Male - Medium_Male;<br>Medium_Female - Medium_Male | linc TCONS_00016511 |           |           |
| 334 | KLF14       | Kruppel-like factor 14 | 2.895  | 0.022417 | 1.6494 | 0.33537 | High_Male - High_Female;<br>Low_Female - High_Female;<br>Low_Male - High_Female;<br>Medium_Female - High_Female;<br>Medium_Male - High_Female;<br>Low_Female - High_Male;<br>Low_Male - High_Male;<br>Medium_Female - High_Male;<br>High_Male - Medium_Male;<br>Low_Male - Low_Female;<br>Low_Female - Medium_Female;<br>Low_Female - Medium_Male;<br>Low_Male - Medium_Female;<br>Low_Male - Medium_Male;<br>Medium_Female - Medium_Male | A_33_P3374947       | NM_138693 | NM_138693 |

|     |      |                               |        |          |        |         |                                                                                                                                                                                                                                                                                                                                                                                                                                           |               |           |           |
|-----|------|-------------------------------|--------|----------|--------|---------|-------------------------------------------------------------------------------------------------------------------------------------------------------------------------------------------------------------------------------------------------------------------------------------------------------------------------------------------------------------------------------------------------------------------------------------------|---------------|-----------|-----------|
| 335 | IDO1 | indoleamine 2,3-dioxygenase 1 | 2.8934 | 0.022474 | 1.6483 | 0.33537 | High_Male - High_Female;<br>Low_Female - High_Female;<br>Low_Male - High_Female;<br>Medium_Female - High_Female;<br>Medium_Male - High_Female;<br>High_Male - Low_Female;<br>High_Male - Low_Male;<br>High_Male - Medium_Female;<br>High_Male - Medium_Male;<br>Low_Female - Low_Male;<br>Medium_Female - Low_Female;<br>Medium_Male - Low_Female;<br>Medium_Female - Low_Male;<br>Medium_Male - Low_Male;<br>Medium_Male - Medium_Female | A_23_P112026  | NM_002164 | NM_002164 |
| 336 |      |                               | 2.882  | 0.022888 | 1.6404 | 0.34003 | High_Male - High_Female;<br>Low_Female - High_Female;<br>Low_Male - High_Female;<br>Medium_Female - High_Female;<br>Medium_Male - High_Female;<br>High_Male - Low_Female;<br>High_Male - Low_Male;<br>High_Male - Medium_Female;<br>High_Male - Medium_Male;<br>Low_Female - Low_Male;<br>Low_Female - Medium_Female;<br>Low_Female - Medium_Male;<br>Medium_Female - Low_Male;<br>Low_Male - Medium_Male;<br>Medium_Female - Medium_Male | tc THC2481061 |           |           |

|     |           |                             |        |          |        |         |                                                                                                                                                                                                                                                                                                                                                                                                                                           |               |           |           |
|-----|-----------|-----------------------------|--------|----------|--------|---------|-------------------------------------------------------------------------------------------------------------------------------------------------------------------------------------------------------------------------------------------------------------------------------------------------------------------------------------------------------------------------------------------------------------------------------------------|---------------|-----------|-----------|
| 337 | VPRBP     | Vpr (HIV-1) binding protein | 2.8811 | 0.022923 | 1.6397 | 0.34003 | High_Male - High_Female;<br>Low_Female - High_Female;<br>Low_Male - High_Female;<br>Medium_Female - High_Female;<br>Medium_Male - High_Female;<br>Low_Female - High_Male;<br>Low_Male - High_Male;<br>Medium_Female - High_Male;<br>Medium_Male - High_Male;<br>Low_Male - Low_Female;<br>Low_Female - Medium_Female;<br>Medium_Male - Low_Female;<br>Low_Male - Medium_Female;<br>Low_Male - Medium_Male;<br>Medium_Male - Medium_Female | A_23_P212595  | NM_014703 | NM_014703 |
| 338 | LOC497256 | uncharacterized LOC497256   | 2.8772 | 0.023067 | 1.637  | 0.34101 | High_Male - High_Female;<br>Low_Female - High_Female;<br>Low_Male - High_Female;<br>Medium_Female - High_Female;<br>Medium_Male - High_Female;<br>Low_Female - High_Male;<br>Low_Male - High_Male;<br>High_Male - Medium_Female;<br>High_Male - Medium_Male;<br>Low_Female - Low_Male;<br>Low_Female - Medium_Female;<br>Low_Female - Medium_Male;<br>Low_Male - Medium_Female;<br>Low_Male - Medium_Male;<br>Medium_Female - Medium_Male | A_33_P3760937 |           | AK094988  |

|     |       |                                                 |        |          |        |         |                                                                                                                                                                                                                                                                                                                                                                                                                                           |              |           |           |
|-----|-------|-------------------------------------------------|--------|----------|--------|---------|-------------------------------------------------------------------------------------------------------------------------------------------------------------------------------------------------------------------------------------------------------------------------------------------------------------------------------------------------------------------------------------------------------------------------------------------|--------------|-----------|-----------|
| 339 | UNC5C | unc-5 homolog C (C. elegans)                    | 2.8746 | 0.023165 | 1.6352 | 0.34101 | High_Male - High_Female;<br>Low_Female - High_Female;<br>Low_Male - High_Female;<br>Medium_Female - High_Female;<br>Medium_Male - High_Female;<br>Low_Female - High_Male;<br>Low_Male - High_Male;<br>High_Male - Medium_Female;<br>High_Male - Medium_Male;<br>Low_Male - Low_Female;<br>Low_Female - Medium_Female;<br>Low_Female - Medium_Male;<br>Low_Male - Medium_Female;<br>Low_Male - Medium_Male;<br>Medium_Female - Medium_Male | A_23_P69617  | NM_003728 | NM_003728 |
| 340 | NR4A3 | nuclear receptor subfamily 4, group A, member 3 | 2.8738 | 0.023194 | 1.6346 | 0.34101 | High_Male - High_Female;<br>Low_Female - High_Female;<br>Low_Male - High_Female;<br>Medium_Female - High_Female;<br>Medium_Male - High_Female;<br>High_Male - Low_Female;<br>High_Male - Low_Male;<br>High_Male - Medium_Female;<br>High_Male - Medium_Male;<br>Low_Male - Low_Female;<br>Low_Female - Medium_Female;<br>Medium_Male - Low_Female;<br>Low_Male - Medium_Female;<br>Medium_Male - Low_Male;<br>Medium_Male - Medium_Female | A_23_P398566 | NM_173200 | NM_173200 |

|     |       |                            |        |          |        |         |                                                                                                                                                                                                                                                                                                                                                                                                                                           |               |           |           |
|-----|-------|----------------------------|--------|----------|--------|---------|-------------------------------------------------------------------------------------------------------------------------------------------------------------------------------------------------------------------------------------------------------------------------------------------------------------------------------------------------------------------------------------------------------------------------------------------|---------------|-----------|-----------|
| 341 | DUX4  | double homeobox 4          | 2.8606 | 0.023691 | 1.6254 | 0.34521 | High_Male - High_Female;<br>Low_Female - High_Female;<br>Low_Male - High_Female;<br>Medium_Female - High_Female;<br>High_Female - Medium_Male;<br>Low_Female - High_Male;<br>Low_Male - High_Male;<br>High_Male - Medium_Female;<br>High_Male - Medium_Male;<br>Low_Female - Low_Male;<br>Low_Female - Medium_Female;<br>Low_Female - Medium_Male;<br>Low_Male - Medium_Female;<br>Low_Male - Medium_Male;<br>Medium_Female - Medium_Male | A_33_P3258699 | NM_033178 | NM_033178 |
| 342 | CD248 | CD248 molecule, endosialin | 2.8596 | 0.023727 | 1.6247 | 0.34521 | High_Male - High_Female;<br>Low_Female - High_Female;<br>Low_Male - High_Female;<br>Medium_Female - High_Female;<br>Medium_Male - High_Female;<br>High_Male - Low_Female;<br>High_Male - Low_Male;<br>High_Male - Medium_Female;<br>Medium_Male - High_Male;<br>Low_Male - Low_Female;<br>Low_Female - Medium_Female;<br>Medium_Male - Low_Female;<br>Low_Male - Medium_Female;<br>Medium_Male - Low_Male;<br>Medium_Male - Medium_Female | A_33_P3337485 | NM_020404 | NM_020404 |

|     |         |                                               |        |          |        |         |                                                                                                                                                                                                                                                                                                                                                                                                                                           |               |           |           |
|-----|---------|-----------------------------------------------|--------|----------|--------|---------|-------------------------------------------------------------------------------------------------------------------------------------------------------------------------------------------------------------------------------------------------------------------------------------------------------------------------------------------------------------------------------------------------------------------------------------------|---------------|-----------|-----------|
| 343 | SNORA39 | small nucleolar RNA, H/ACA box 39             | 2.8582 | 0.023784 | 1.6237 | 0.34521 | High_Male - High_Female;<br>Low_Female - High_Female;<br>Low_Male - High_Female;<br>Medium_Female - High_Female;<br>High_Female - Medium_Male;<br>High_Male - Low_Female;<br>High_Male - Low_Male;<br>High_Male - Medium_Female;<br>High_Male - Medium_Male;<br>Low_Female - Low_Male;<br>Low_Female - Medium_Female;<br>Low_Female - Medium_Male;<br>Low_Male - Medium_Female;<br>Low_Male - Medium_Male;<br>Medium_Female - Medium_Male | A_21_P0000327 | NR_002972 | NR_002972 |
| 344 | TMCC2   | transmembrane and coiled-coil domain family 2 | 2.8574 | 0.023814 | 1.6232 | 0.34521 | High_Female - High_Male;<br>High_Female - Low_Female;<br>High_Female - Low_Male;<br>Medium_Female - High_Female;<br>High_Female - Medium_Male;<br>Low_Female - High_Male;<br>Low_Male - High_Male;<br>Medium_Female - High_Male;<br>Medium_Male - High_Male;<br>Low_Female - Low_Male;<br>Medium_Female - Low_Female;<br>Medium_Male - Low_Female;<br>Medium_Female - Low_Male;<br>Medium_Male - Low_Male;<br>Medium_Female - Medium_Male | A_32_P133840  | NM_014858 | NM_014858 |



|     |     |                       |        |          |        |         |                                                                                                                                                                                                                                                                                                                                                                                                                                           |               |           |           |
|-----|-----|-----------------------|--------|----------|--------|---------|-------------------------------------------------------------------------------------------------------------------------------------------------------------------------------------------------------------------------------------------------------------------------------------------------------------------------------------------------------------------------------------------------------------------------------------------|---------------|-----------|-----------|
| 345 | CA4 | carbonic anhydrase IV | 2.8571 | 0.023824 | 1.623  | 0.34521 | High_Female - High_Male;<br>High_Female - Low_Female;<br>High_Female - Low_Male;<br>High_Female - Medium_Female;<br>High_Female - Medium_Male;<br>High_Male - Low_Female;<br>High_Male - Low_Male;<br>Medium_Female - High_Male;<br>High_Male - Medium_Male;<br>Low_Female - Low_Male;<br>Medium_Female - Low_Female;<br>Medium_Male - Low_Female;<br>Medium_Female - Low_Male;<br>Medium_Male - Low_Male;<br>Medium_Female - Medium_Male | A_23_P4096    | NM_000717 | NM_000717 |
| 346 |     |                       | 2.8504 | 0.024083 | 1.6183 | 0.34656 | High_Male - High_Female;<br>Low_Female - High_Female;<br>Low_Male - High_Female;<br>Medium_Female - High_Female;<br>Medium_Male - High_Female;<br>Low_Female - High_Male;<br>Low_Male - High_Male;<br>High_Male - Medium_Female;<br>High_Male - Medium_Male;<br>Low_Female - Low_Male;<br>Low_Female - Medium_Female;<br>Low_Female - Medium_Male;<br>Low_Male - Medium_Female;<br>Low_Male - Medium_Male;<br>Medium_Female - Medium_Male | tc THC2764040 |           |           |

|     |                  |                              |        |          |        |         |                                                                                                                                                                                                                                                                                                                                                                                                                                           |                     |           |           |
|-----|------------------|------------------------------|--------|----------|--------|---------|-------------------------------------------------------------------------------------------------------------------------------------------------------------------------------------------------------------------------------------------------------------------------------------------------------------------------------------------------------------------------------------------------------------------------------------------|---------------------|-----------|-----------|
| 347 | LOC10013439<br>1 | uncharacterized LOC100134391 | 2.8497 | 0.02411  | 1.6178 | 0.34656 | High_Male - High_Female;<br>Low_Female - High_Female;<br>Low_Male - High_Female;<br>Medium_Female - High_Female;<br>Medium_Male - High_Female;<br>Low_Female - High_Male;<br>Low_Male - High_Male;<br>High_Male - Medium_Female;<br>High_Male - Medium_Male;<br>Low_Male - Low_Female;<br>Low_Female - Medium_Female;<br>Low_Female - Medium_Male;<br>Low_Male - Medium_Female;<br>Low_Male - Medium_Male;<br>Medium_Female - Medium_Male | A_21_P0014355       | XR_109425 | XR_109425 |
| 348 | XLOC_000751      |                              | 2.8493 | 0.024126 | 1.6175 | 0.34656 | High_Male - High_Female;<br>Low_Female - High_Female;<br>Low_Male - High_Female;<br>Medium_Female - High_Female;<br>Medium_Male - High_Female;<br>High_Male - Low_Female;<br>Low_Male - High_Male;<br>Medium_Female - High_Male;<br>High_Male - Medium_Male;<br>Low_Male - Low_Female;<br>Medium_Female - Low_Female;<br>Low_Female - Medium_Male;<br>Low_Male - Medium_Female;<br>Low_Male - Medium_Male;<br>Medium_Female - Medium_Male | linc TCONS_00001436 |           |           |

|     |                    |                                                          |        |          |        |         |                                                                                                                                                                                                                                                                                                                                                                                                                                           |                                                |              |              |
|-----|--------------------|----------------------------------------------------------|--------|----------|--------|---------|-------------------------------------------------------------------------------------------------------------------------------------------------------------------------------------------------------------------------------------------------------------------------------------------------------------------------------------------------------------------------------------------------------------------------------------------|------------------------------------------------|--------------|--------------|
| 349 | XLOC_I2_0158<br>55 |                                                          | 2.847  | 0.024215 | 1.6159 | 0.34685 | High_Male - High_Female;<br>Low_Female - High_Female;<br>Low_Male - High_Female;<br>Medium_Female - High_Female;<br>Medium_Male - High_Female;<br>Low_Female - High_Male;<br>Low_Male - High_Male;<br>High_Male - Medium_Female;<br>High_Male - Medium_Male;<br>Low_Male - Low_Female;<br>Low_Female - Medium_Female;<br>Low_Female - Medium_Male;<br>Low_Male - Medium_Female;<br>Low_Male - Medium_Male;<br>Medium_Female - Medium_Male | ens ENST00000444722 linc T<br>CONS_I2_00030882 |              |              |
| 350 | FCGR1B             | Fc fragment of IgG, high affinity Ib,<br>receptor (CD64) | 2.8441 | 0.02433  | 1.6139 | 0.3475  | High_Female - High_Male;<br>Low_Female - High_Female;<br>High_Female - Low_Male;<br>High_Female - Medium_Female;<br>High_Female - Medium_Male;<br>Low_Female - High_Male;<br>High_Male - Low_Male;<br>High_Male - Medium_Female;<br>High_Male - Medium_Male;<br>Low_Female - Low_Male;<br>Low_Female - Medium_Female;<br>Low_Female - Medium_Male;<br>Medium_Female - Low_Male;<br>Medium_Male - Low_Male;<br>Medium_Female - Medium_Male | A_21_P0010728                                  | NM_001244910 | NM_001244910 |

|     |                    |  |        |          |        |         |                                                                                                                                                                                                                                                                                                                                                                                                                                           |                                          |  |  |
|-----|--------------------|--|--------|----------|--------|---------|-------------------------------------------------------------------------------------------------------------------------------------------------------------------------------------------------------------------------------------------------------------------------------------------------------------------------------------------------------------------------------------------------------------------------------------------|------------------------------------------|--|--|
| 351 | XLOC_012166        |  | 2.8362 | 0.024641 | 1.6083 | 0.35094 | High_Male - High_Female;<br>Low_Female - High_Female;<br>Low_Male - High_Female;<br>Medium_Female - High_Female;<br>Medium_Male - High_Female;<br>Low_Female - High_Male;<br>High_Male - Low_Male;<br>High_Male - Medium_Female;<br>High_Male - Medium_Male;<br>Low_Female - Low_Male;<br>Low_Female - Medium_Female;<br>Low_Female - Medium_Male;<br>Low_Male - Medium_Female;<br>Low_Male - Medium_Male;<br>Medium_Female - Medium_Male | linc TCONS_00025346                      |  |  |
| 352 | XLOC_I2_0046<br>11 |  | 2.8303 | 0.024876 | 1.6042 | 0.35328 | High_Male - High_Female;<br>Low_Female - High_Female;<br>Low_Male - High_Female;<br>Medium_Female - High_Female;<br>Medium_Male - High_Female;<br>Low_Female - High_Male;<br>Low_Male - High_Male;<br>Medium_Female - High_Male;<br>Medium_Male - High_Male;<br>Low_Male - Low_Female;<br>Low_Female - Medium_Female;<br>Low_Female - Medium_Male;<br>Low_Male - Medium_Female;<br>Low_Male - Medium_Male;<br>Medium_Male - Medium_Female | tc THC2520829 linc TCONS_I<br>2_00008540 |  |  |

|     |             |                                        |        |          |        |        |                                                                                                                                                                                                                                                                                                                                                                                                                                           |                                                             |           |           |
|-----|-------------|----------------------------------------|--------|----------|--------|--------|-------------------------------------------------------------------------------------------------------------------------------------------------------------------------------------------------------------------------------------------------------------------------------------------------------------------------------------------------------------------------------------------------------------------------------------------|-------------------------------------------------------------|-----------|-----------|
| 353 | XLOC_007407 |                                        | 2.8244 | 0.02511  | 1.6002 | 0.3551 | High_Male - High_Female;<br>Low_Female - High_Female;<br>Low_Male - High_Female;<br>Medium_Female - High_Female;<br>Medium_Male - High_Female;<br>Low_Female - High_Male;<br>Low_Male - High_Male;<br>High_Male - Medium_Female;<br>High_Male - Medium_Male;<br>Low_Female - Low_Male;<br>Low_Female - Medium_Female;<br>Low_Female - Medium_Male;<br>Low_Male - Medium_Female;<br>Low_Male - Medium_Male;<br>Medium_Male - Medium_Female | linc TCONS_00016016 linc TCONS_00016015 linc TCONS_00016621 |           |           |
| 354 | NCAPH       | non-SMC condensin I complex, subunit H | 2.8234 | 0.025151 | 1.5994 | 0.3551 | High_Male - High_Female;<br>Low_Female - High_Female;<br>Low_Male - High_Female;<br>Medium_Female - High_Female;<br>Medium_Male - High_Female;<br>Low_Female - High_Male;<br>Low_Male - High_Male;<br>High_Male - Medium_Female;<br>High_Male - Medium_Male;<br>Low_Female - Low_Male;<br>Low_Female - Medium_Female;<br>Low_Female - Medium_Male;<br>Low_Male - Medium_Female;<br>Low_Male - Medium_Male;<br>Medium_Female - Medium_Male | A_33_P3230259                                               | NM_015341 | NM_015341 |

|     |             |  |        |          |        |        |                                                                                                                                                                                                                                                                                                                                                                                                                                           |                     |  |          |
|-----|-------------|--|--------|----------|--------|--------|-------------------------------------------------------------------------------------------------------------------------------------------------------------------------------------------------------------------------------------------------------------------------------------------------------------------------------------------------------------------------------------------------------------------------------------------|---------------------|--|----------|
| 355 | XLOC_005082 |  | 2.8201 | 0.025287 | 1.5971 | 0.3551 | High_Female - High_Male;<br>High_Female - Low_Female;<br>Low_Male - High_Female;<br>Medium_Female - High_Female;<br>High_Female - Medium_Male;<br>Low_Female - High_Male;<br>Low_Male - High_Male;<br>Medium_Female - High_Male;<br>Medium_Male - High_Male;<br>Low_Male - Low_Female;<br>Medium_Female - Low_Female;<br>Low_Female - Medium_Male;<br>Low_Male - Medium_Female;<br>Low_Male - Medium_Male;<br>Medium_Female - Medium_Male | linc TCONS_00010555 |  |          |
| 356 |             |  | 2.8181 | 0.025365 | 1.5958 | 0.3551 | High_Male - High_Female;<br>Low_Female - High_Female;<br>Low_Male - High_Female;<br>Medium_Female - High_Female;<br>Medium_Male - High_Female;<br>Low_Female - High_Male;<br>Low_Male - High_Male;<br>High_Male - Medium_Female;<br>High_Male - Medium_Male;<br>Low_Male - Low_Female;<br>Low_Female - Medium_Female;<br>Low_Female - Medium_Male;<br>Low_Male - Medium_Female;<br>Low_Male - Medium_Male;<br>Medium_Female - Medium_Male | A_33_P3260110       |  | AK126960 |

|     |                  |                              |        |          |        |        |                                                                                                                                                                                                                                                                                                                                                                                                                                           |                     |           |           |
|-----|------------------|------------------------------|--------|----------|--------|--------|-------------------------------------------------------------------------------------------------------------------------------------------------------------------------------------------------------------------------------------------------------------------------------------------------------------------------------------------------------------------------------------------------------------------------------------------|---------------------|-----------|-----------|
| 357 | XLOC_003400      |                              | 2.8169 | 0.025416 | 1.5949 | 0.3551 | High_Female - High_Male;<br>High_Female - Low_Female;<br>High_Female - Low_Male;<br>Medium_Female - High_Female;<br>Medium_Male - High_Female;<br>High_Male - Low_Female;<br>High_Male - Low_Male;<br>Medium_Female - High_Male;<br>Medium_Male - High_Male;<br>Low_Female - Low_Male;<br>Medium_Female - Low_Female;<br>Medium_Male - Low_Female;<br>Medium_Female - Low_Male;<br>Medium_Male - Low_Male;<br>Medium_Male - Medium_Female | linc TCONS_00007354 |           |           |
| 358 | 8<br>LOC10050597 | uncharacterized LOC100505978 | 2.8165 | 0.025431 | 1.5946 | 0.3551 | High_Male - High_Female;<br>Low_Female - High_Female;<br>Low_Male - High_Female;<br>Medium_Female - High_Female;<br>High_Female - Medium_Male;<br>Low_Female - High_Male;<br>Low_Male - High_Male;<br>Medium_Female - High_Male;<br>High_Male - Medium_Male;<br>Low_Female - Low_Male;<br>Low_Female - Medium_Female;<br>Low_Female - Medium_Male;<br>Low_Male - Medium_Female;<br>Low_Male - Medium_Male;<br>Medium_Female - Medium_Male | A_21_P0000836       | NR_038912 | NR_038912 |

|     |       |                                     |        |          |        |         |                                                                                                                                                                                                                                                                                                                                                                                                                                           |               |          |
|-----|-------|-------------------------------------|--------|----------|--------|---------|-------------------------------------------------------------------------------------------------------------------------------------------------------------------------------------------------------------------------------------------------------------------------------------------------------------------------------------------------------------------------------------------------------------------------------------------|---------------|----------|
| 359 | AMPD3 | adenosine monophosphate deaminase 3 | 2.8099 | 0.025705 | 1.59   | 0.35744 | High_Male - High_Female;<br>Low_Female - High_Female;<br>Low_Male - High_Female;<br>Medium_Female - High_Female;<br>High_Female - Medium_Male;<br>High_Male - Low_Female;<br>High_Male - Low_Male;<br>High_Male - Medium_Female;<br>High_Male - Medium_Male;<br>Low_Female - Low_Male;<br>Medium_Female - Low_Female;<br>Low_Female - Medium_Male;<br>Medium_Female - Low_Male;<br>Low_Male - Medium_Male;<br>Medium_Female - Medium_Male | A_33_P3216938 | EF537581 |
| 360 |       |                                     | 2.809  | 0.025741 | 1.5894 | 0.35744 | High_Male - High_Female;<br>Low_Female - High_Female;<br>Low_Male - High_Female;<br>Medium_Female - High_Female;<br>Medium_Male - High_Female;<br>Low_Female - High_Male;<br>Low_Male - High_Male;<br>High_Male - Medium_Female;<br>High_Male - Medium_Male;<br>Low_Female - Low_Male;<br>Low_Female - Medium_Female;<br>Low_Female - Medium_Male;<br>Low_Male - Medium_Female;<br>Low_Male - Medium_Male;<br>Medium_Female - Medium_Male | A_33_P3277096 | AJ315539 |



|     |             |                                        |        |          |        |         |                                                                                                                                                                                                                                                                                                                                                                                                                                           |               |           |           |
|-----|-------------|----------------------------------------|--------|----------|--------|---------|-------------------------------------------------------------------------------------------------------------------------------------------------------------------------------------------------------------------------------------------------------------------------------------------------------------------------------------------------------------------------------------------------------------------------------------------|---------------|-----------|-----------|
| 361 | OLIG1       | oligodendrocyte transcription factor 1 | 2.8067 | 0.025837 | 1.5878 | 0.35779 | High_Male - High_Female;<br>High_Female - Low_Female;<br>High_Female - Low_Male;<br>Medium_Female - High_Female;<br>Medium_Male - High_Female;<br>High_Male - Low_Female;<br>High_Male - Low_Male;<br>High_Male - Medium_Female;<br>Medium_Male - High_Male;<br>Low_Male - Low_Female;<br>Medium_Female - Low_Female;<br>Medium_Male - Low_Female;<br>Medium_Female - Low_Male;<br>Medium_Male - Low_Male;<br>Medium_Male - Medium_Female | A_23_P154849  | NM_138983 | NM_138983 |
| 362 | XLOC_008221 |                                        | 2.7995 | 0.026137 | 1.5828 | 0.35941 | High_Male - High_Female;<br>Low_Female - High_Female;<br>Low_Male - High_Female;<br>Medium_Female - High_Female;<br>Medium_Male - High_Female;<br>High_Male - Low_Female;<br>High_Male - Low_Male;<br>High_Male - Medium_Female;<br>Medium_Male - High_Male;<br>Low_Male - Low_Female;<br>Medium_Female - Low_Female;<br>Medium_Male - Low_Female;<br>Low_Male - Medium_Female;<br>Medium_Male - Low_Male;<br>Medium_Male - Medium_Female | A_21_P0006461 |           | BX331476  |

|     |             |  |        |          |        |         |                                                                                                                                                                                                                                                                                                                                                                                                                                           |                     |  |  |
|-----|-------------|--|--------|----------|--------|---------|-------------------------------------------------------------------------------------------------------------------------------------------------------------------------------------------------------------------------------------------------------------------------------------------------------------------------------------------------------------------------------------------------------------------------------------------|---------------------|--|--|
| 363 | XLOC_008609 |  | 2.7991 | 0.026153 | 1.5825 | 0.35941 | High_Male - High_Female;<br>Low_Female - High_Female;<br>Low_Male - High_Female;<br>Medium_Female - High_Female;<br>Medium_Male - High_Female;<br>Low_Female - High_Male;<br>Low_Male - High_Male;<br>High_Male - Medium_Female;<br>High_Male - Medium_Male;<br>Low_Female - Low_Male;<br>Low_Female - Medium_Female;<br>Low_Female - Medium_Male;<br>Low_Male - Medium_Female;<br>Low_Male - Medium_Male;<br>Medium_Female - Medium_Male | linc TCONS_00018331 |  |  |
| 364 | XLOC_002263 |  | 2.7987 | 0.02617  | 1.5822 | 0.35941 | High_Male - High_Female;<br>Low_Female - High_Female;<br>Low_Male - High_Female;<br>Medium_Female - High_Female;<br>Medium_Male - High_Female;<br>High_Male - Low_Female;<br>High_Male - Low_Male;<br>Medium_Female - High_Male;<br>High_Male - Medium_Male;<br>Low_Female - Low_Male;<br>Medium_Female - Low_Female;<br>Low_Female - Medium_Male;<br>Medium_Female - Low_Male;<br>Low_Male - Medium_Male;<br>Medium_Female - Medium_Male | linc TCONS_00004378 |  |  |

|     |             |                                                   |        |          |        |         |                                                                                                                                                                                                                                                                                                                                                                                                                                           |                     |           |           |
|-----|-------------|---------------------------------------------------|--------|----------|--------|---------|-------------------------------------------------------------------------------------------------------------------------------------------------------------------------------------------------------------------------------------------------------------------------------------------------------------------------------------------------------------------------------------------------------------------------------------------|---------------------|-----------|-----------|
| 365 | XLOC_007974 |                                                   | 2.7969 | 0.026248 | 1.5809 | 0.35949 | High_Male - High_Female;<br>Low_Female - High_Female;<br>Low_Male - High_Female;<br>Medium_Female - High_Female;<br>High_Female - Medium_Male;<br>Low_Female - High_Male;<br>High_Male - Low_Male;<br>Medium_Female - High_Male;<br>High_Male - Medium_Male;<br>Low_Female - Low_Male;<br>Low_Female - Medium_Female;<br>Low_Female - Medium_Male;<br>Medium_Female - Low_Male;<br>Low_Male - Medium_Male;<br>Medium_Female - Medium_Male | linc TCONS_00017163 |           |           |
| 366 | HMGCLL1     | 3-hydroxymethyl-3-methylglutaryl-CoA lyase-like 1 | 2.7938 | 0.026377 | 1.5788 | 0.3598  | High_Male - High_Female;<br>Low_Female - High_Female;<br>Low_Male - High_Female;<br>Medium_Female - High_Female;<br>High_Female - Medium_Male;<br>Low_Female - High_Male;<br>High_Male - Low_Male;<br>Medium_Female - High_Male;<br>High_Male - Medium_Male;<br>Low_Female - Low_Male;<br>Low_Female - Medium_Female;<br>Low_Female - Medium_Male;<br>Medium_Female - Low_Male;<br>Low_Male - Medium_Male;<br>Medium_Female - Medium_Male | A_33_P3214012       | NM_019036 | NM_019036 |

|     |       |                                                                                       |        |          |        |        |                                                                                                                                                                                                                                                                                                                                                                                                                                           |               |              |              |
|-----|-------|---------------------------------------------------------------------------------------|--------|----------|--------|--------|-------------------------------------------------------------------------------------------------------------------------------------------------------------------------------------------------------------------------------------------------------------------------------------------------------------------------------------------------------------------------------------------------------------------------------------------|---------------|--------------|--------------|
| 367 | ACCSL | 1-aminocyclopropane-1-carboxylate synthase homolog (Arabidopsis)(non-functional)-like | 2.7914 | 0.026481 | 1.5771 | 0.3598 | High_Male - High_Female;<br>Low_Female - High_Female;<br>Low_Male - High_Female;<br>Medium_Female - High_Female;<br>Medium_Male - High_Female;<br>Low_Female - High_Male;<br>High_Male - Low_Male;<br>High_Male - Medium_Female;<br>High_Male - Medium_Male;<br>Low_Female - Low_Male;<br>Low_Female - Medium_Female;<br>Low_Female - Medium_Male;<br>Low_Male - Medium_Female;<br>Low_Male - Medium_Male;<br>Medium_Female - Medium_Male | A_33_P3255924 | NM_001031854 | NM_001031854 |
| 368 |       |                                                                                       | 2.7913 | 0.026487 | 1.577  | 0.3598 | High_Male - High_Female;<br>Low_Female - High_Female;<br>Low_Male - High_Female;<br>Medium_Female - High_Female;<br>Medium_Male - High_Female;<br>Low_Female - High_Male;<br>Low_Male - High_Male;<br>High_Male - Medium_Female;<br>High_Male - Medium_Male;<br>Low_Male - Low_Female;<br>Low_Female - Medium_Female;<br>Low_Female - Medium_Male;<br>Low_Male - Medium_Female;<br>Low_Male - Medium_Male;<br>Medium_Female - Medium_Male | A_33_P3332627 |              |              |

|     |             |                                                                                     |        |          |        |         |                                                                                                                                                                                                                                                                                                                                                                                                                                           |                                                                             |           |           |
|-----|-------------|-------------------------------------------------------------------------------------|--------|----------|--------|---------|-------------------------------------------------------------------------------------------------------------------------------------------------------------------------------------------------------------------------------------------------------------------------------------------------------------------------------------------------------------------------------------------------------------------------------------------|-----------------------------------------------------------------------------|-----------|-----------|
| 369 | XLOC_011719 |                                                                                     | 2.7854 | 0.026736 | 1.5729 | 0.3622  | High_Male - High_Female;<br>Low_Female - High_Female;<br>Low_Male - High_Female;<br>Medium_Female - High_Female;<br>Medium_Male - High_Female;<br>Low_Female - High_Male;<br>Low_Male - High_Male;<br>Medium_Female - High_Male;<br>High_Male - Medium_Male;<br>Low_Male - Low_Female;<br>Low_Female - Medium_Female;<br>Low_Female - Medium_Male;<br>Low_Male - Medium_Female;<br>Low_Male - Medium_Male;<br>Medium_Female - Medium_Male | tc THC2675915 tc THC26930<br>28 linc TCONS_00024395 linc<br> TCONS_00024396 |           |           |
| 370 | KIR2DL5A    | killer cell immunoglobulin-like receptor,<br>two domains, long cytoplasmic tail, 5A | 2.7813 | 0.026913 | 1.57   | 0.36362 | High_Male - High_Female;<br>High_Female - Low_Female;<br>Low_Male - High_Female;<br>Medium_Female - High_Female;<br>Medium_Male - High_Female;<br>High_Male - Low_Female;<br>Low_Male - High_Male;<br>Medium_Female - High_Male;<br>High_Male - Medium_Male;<br>Low_Male - Low_Female;<br>Medium_Female - Low_Female;<br>Medium_Male - Low_Female;<br>Low_Male - Medium_Female;<br>Low_Male - Medium_Male;<br>Medium_Female - Medium_Male | A_33_P3270346                                                               | NM_020535 | NM_020535 |

|     |       |                                   |        |          |        |         |                                                                                                                                                                                                                                                                                                                                                                                                                                           |              |           |           |
|-----|-------|-----------------------------------|--------|----------|--------|---------|-------------------------------------------------------------------------------------------------------------------------------------------------------------------------------------------------------------------------------------------------------------------------------------------------------------------------------------------------------------------------------------------------------------------------------------------|--------------|-----------|-----------|
| 371 | GSTT1 | glutathione S-transferase theta 1 | 2.7772 | 0.027091 | 1.5672 | 0.36503 | High_Female - High_Male;<br>High_Female - Low_Female;<br>Low_Male - High_Female;<br>High_Female - Medium_Female;<br>High_Female - Medium_Male;<br>Low_Female - High_Male;<br>Low_Male - High_Male;<br>High_Male - Medium_Female;<br>Medium_Male - High_Male;<br>Low_Male - Low_Female;<br>Low_Female - Medium_Female;<br>Low_Female - Medium_Male;<br>Low_Male - Medium_Female;<br>Low_Male - Medium_Male;<br>Medium_Male - Medium_Female | A_23_P254944 | NM_000853 | NM_000853 |
| 372 |       |                                   | 2.7751 | 0.027186 | 1.5657 | 0.36533 | High_Female - High_Male;<br>High_Female - Low_Female;<br>High_Female - Low_Male;<br>Medium_Female - High_Female;<br>Medium_Male - High_Female;<br>Low_Female - High_Male;<br>Low_Male - High_Male;<br>Medium_Female - High_Male;<br>Medium_Male - High_Male;<br>Low_Female - Low_Male;<br>Medium_Female - Low_Female;<br>Medium_Male - Low_Female;<br>Medium_Female - Low_Male;<br>Medium_Male - Low_Male;<br>Medium_Female - Medium_Male | A_24_P64100  |           | AF495725  |

|     |           |                                   |        |          |        |         |                                                                                                                                                                                                                                                                                                                                                                                                                                           |               |           |           |
|-----|-----------|-----------------------------------|--------|----------|--------|---------|-------------------------------------------------------------------------------------------------------------------------------------------------------------------------------------------------------------------------------------------------------------------------------------------------------------------------------------------------------------------------------------------------------------------------------------------|---------------|-----------|-----------|
| 373 | LOC645638 | WDNM1-like pseudogene             | 2.7687 | 0.027465 | 1.5612 | 0.36757 | High_Male - High_Female;<br>Low_Female - High_Female;<br>Low_Male - High_Female;<br>High_Female - Medium_Female;<br>Medium_Male - High_Female;<br>High_Male - Low_Female;<br>High_Male - Low_Male;<br>High_Male - Medium_Female;<br>Medium_Male - High_Male;<br>Low_Male - Low_Female;<br>Low_Female - Medium_Female;<br>Medium_Male - Low_Female;<br>Low_Male - Medium_Female;<br>Medium_Male - Low_Male;<br>Medium_Male - Medium_Female | A_21_P0009342 | NR_030732 | NR_030732 |
| 374 | RAB2B     | RAB2B, member RAS oncogene family | 2.7679 | 0.027499 | 1.5607 | 0.36757 | High_Female - High_Male;<br>Low_Female - High_Female;<br>High_Female - Low_Male;<br>Medium_Female - High_Female;<br>High_Female - Medium_Male;<br>Low_Female - High_Male;<br>Low_Male - High_Male;<br>Medium_Female - High_Male;<br>Medium_Male - High_Male;<br>Low_Female - Low_Male;<br>Medium_Female - Low_Female;<br>Low_Female - Medium_Male;<br>Medium_Female - Low_Male;<br>Low_Male - Medium_Male;<br>Medium_Female - Medium_Male | A_33_P3295803 | NM_032846 | NM_032846 |

|     |         |                                                       |        |          |        |         |                                                                                                                                                                                                                                                                                                                                                                                                                                           |               |              |              |
|-----|---------|-------------------------------------------------------|--------|----------|--------|---------|-------------------------------------------------------------------------------------------------------------------------------------------------------------------------------------------------------------------------------------------------------------------------------------------------------------------------------------------------------------------------------------------------------------------------------------------|---------------|--------------|--------------|
| 375 | KREMEN1 | kringle containing transmembrane protein 1            | 2.7555 | 0.028055 | 1.552  | 0.37399 | High_Female - High_Male;<br>High_Female - Low_Female;<br>High_Female - Low_Male;<br>High_Female - Medium_Female;<br>High_Female - Medium_Male;<br>Low_Female - High_Male;<br>High_Male - Low_Male;<br>Medium_Female - High_Male;<br>High_Male - Medium_Male;<br>Low_Female - Low_Male;<br>Medium_Female - Low_Female;<br>Low_Female - Medium_Male;<br>Medium_Female - Low_Male;<br>Medium_Male - Low_Male;<br>Medium_Female - Medium_Male | A_23_P68851   | NM_001039570 | NM_001039570 |
| 376 | FCGR1B  | Fc fragment of IgG, high affinity Ib, receptor (CD64) | 2.751  | 0.028258 | 1.5489 | 0.3757  | High_Male - High_Female;<br>Low_Female - High_Female;<br>High_Female - Low_Male;<br>High_Female - Medium_Female;<br>High_Female - Medium_Male;<br>Low_Female - High_Male;<br>High_Male - Low_Male;<br>High_Male - Medium_Female;<br>High_Male - Medium_Male;<br>Low_Female - Low_Male;<br>Low_Female - Medium_Female;<br>Low_Female - Medium_Male;<br>Medium_Female - Low_Male;<br>Medium_Male - Low_Male;<br>Medium_Female - Medium_Male | A_21_P0010561 | NM_001244910 | NM_001244910 |



|     |        |                                 |        |          |        |         |                                                                                                                                                                                                                                                                                                                                                                                                                                           |                |           |           |
|-----|--------|---------------------------------|--------|----------|--------|---------|-------------------------------------------------------------------------------------------------------------------------------------------------------------------------------------------------------------------------------------------------------------------------------------------------------------------------------------------------------------------------------------------------------------------------------------------|----------------|-----------|-----------|
| 377 | HOTAIR |                                 | 2.7487 | 0.028366 | 1.5472 | 0.37613 | High_Male - High_Female;<br>Low_Female - High_Female;<br>Low_Male - High_Female;<br>Medium_Female - High_Female;<br>Medium_Male - High_Female;<br>Low_Female - High_Male;<br>Low_Male - High_Male;<br>High_Male - Medium_Female;<br>High_Male - Medium_Male;<br>Low_Female - Low_Male;<br>Low_Female - Medium_Female;<br>Low_Female - Medium_Male;<br>Low_Male - Medium_Female;<br>Low_Male - Medium_Male;<br>Medium_Female - Medium_Male | A_19_P00330464 | NR_003716 | NR_003716 |
| 378 | GDF5   | growth differentiation factor 5 | 2.7459 | 0.028493 | 1.5453 | 0.37682 | High_Male - High_Female;<br>Low_Female - High_Female;<br>Low_Male - High_Female;<br>Medium_Female - High_Female;<br>Medium_Male - High_Female;<br>Low_Female - High_Male;<br>Low_Male - High_Male;<br>High_Male - Medium_Female;<br>High_Male - Medium_Male;<br>Low_Male - Low_Female;<br>Low_Female - Medium_Female;<br>Low_Female - Medium_Male;<br>Low_Male - Medium_Female;<br>Low_Male - Medium_Male;<br>Medium_Female - Medium_Male | A_23_P259955   | NM_000557 | NM_000557 |

|     |                  |                                    |        |          |        |         |                                                                                                                                                                                                                                                                                                                                                                                                                                           |               |           |           |
|-----|------------------|------------------------------------|--------|----------|--------|---------|-------------------------------------------------------------------------------------------------------------------------------------------------------------------------------------------------------------------------------------------------------------------------------------------------------------------------------------------------------------------------------------------------------------------------------------------|---------------|-----------|-----------|
| 379 | LOC10013361<br>2 | uncharacterized LOC100133612       | 2.7436 | 0.0286   | 1.5436 | 0.37687 | High_Male - High_Female;<br>Low_Female - High_Female;<br>Low_Male - High_Female;<br>Medium_Female - High_Female;<br>Medium_Male - High_Female;<br>Low_Female - High_Male;<br>Low_Male - High_Male;<br>High_Male - Medium_Female;<br>High_Male - Medium_Male;<br>Low_Female - Low_Male;<br>Low_Female - Medium_Female;<br>Low_Female - Medium_Male;<br>Low_Male - Medium_Female;<br>Low_Male - Medium_Male;<br>Medium_Female - Medium_Male | A_21_P0010510 |           | AK130173  |
| 380 | C5orf38          | chromosome 5 open reading frame 38 | 2.7425 | 0.028648 | 1.5429 | 0.37687 | High_Male - High_Female;<br>Low_Female - High_Female;<br>High_Female - Low_Male;<br>High_Female - Medium_Female;<br>High_Female - Medium_Male;<br>Low_Female - High_Male;<br>High_Male - Low_Male;<br>High_Male - Medium_Female;<br>High_Male - Medium_Male;<br>Low_Female - Low_Male;<br>Low_Female - Medium_Female;<br>Low_Female - Medium_Male;<br>Low_Male - Medium_Female;<br>Low_Male - Medium_Male;<br>Medium_Female - Medium_Male | A_23_P331235  | NM_178569 | NM_178569 |

|     |                    |  |        |          |        |         |                                                                                                                                                                                                                                                                                                                                                                                                                                           |                        |  |  |
|-----|--------------------|--|--------|----------|--------|---------|-------------------------------------------------------------------------------------------------------------------------------------------------------------------------------------------------------------------------------------------------------------------------------------------------------------------------------------------------------------------------------------------------------------------------------------------|------------------------|--|--|
| 381 | XLOC_005780        |  | 2.7384 | 0.028838 | 1.54   | 0.37837 | High_Female - High_Male;<br>High_Female - Low_Female;<br>High_Female - Low_Male;<br>High_Female - Medium_Female;<br>High_Female - Medium_Male;<br>Low_Female - High_Male;<br>Low_Male - High_Male;<br>High_Male - Medium_Female;<br>Medium_Male - High_Male;<br>Low_Female - Low_Male;<br>Low_Female - Medium_Female;<br>Low_Female - Medium_Male;<br>Low_Male - Medium_Female;<br>Medium_Male - Low_Male;<br>Medium_Male - Medium_Female | linc TCONS_00012221    |  |  |
| 382 | XLOC_I2_0152<br>12 |  | 2.7348 | 0.029005 | 1.5375 | 0.37958 | High_Female - High_Male;<br>High_Female - Low_Female;<br>High_Female - Low_Male;<br>High_Female - Medium_Female;<br>High_Female - Medium_Male;<br>High_Male - Low_Female;<br>High_Male - Low_Male;<br>High_Male - Medium_Female;<br>Medium_Male - High_Male;<br>Low_Female - Low_Male;<br>Low_Female - Medium_Female;<br>Medium_Male - Low_Female;<br>Medium_Female - Low_Male;<br>Medium_Male - Low_Male;<br>Medium_Male - Medium_Female | linc TCONS_I2_00029343 |  |  |

|     |             |                                                              |        |          |        |         |                                                                                                                                                                                                                                                                                                                                                                                                                                           |                     |           |           |
|-----|-------------|--------------------------------------------------------------|--------|----------|--------|---------|-------------------------------------------------------------------------------------------------------------------------------------------------------------------------------------------------------------------------------------------------------------------------------------------------------------------------------------------------------------------------------------------------------------------------------------------|---------------------|-----------|-----------|
| 383 | TTY10       | testis-specific transcript, Y-linked 10 (non-protein coding) | 2.7321 | 0.02913  | 1.5357 | 0.37988 | High_Male - High_Female;<br>Low_Female - High_Female;<br>Low_Male - High_Female;<br>Medium_Female - High_Female;<br>Medium_Male - High_Female;<br>High_Male - Low_Female;<br>Low_Male - High_Male;<br>Medium_Female - High_Male;<br>Medium_Male - High_Male;<br>Low_Male - Low_Female;<br>Medium_Female - Low_Female;<br>Medium_Male - Low_Female;<br>Low_Male - Medium_Female;<br>Medium_Male - Low_Male;<br>Medium_Male - Medium_Female | A_23_P320622        | NR_001542 | NR_001542 |
| 384 | XLOC_004375 |                                                              | 2.7311 | 0.029181 | 1.5349 | 0.37988 | High_Male - High_Female;<br>Low_Female - High_Female;<br>Low_Male - High_Female;<br>Medium_Female - High_Female;<br>Medium_Male - High_Female;<br>High_Male - Low_Female;<br>High_Male - Low_Male;<br>High_Male - Medium_Female;<br>High_Male - Medium_Male;<br>Low_Male - Low_Female;<br>Low_Female - Medium_Female;<br>Low_Female - Medium_Male;<br>Low_Male - Medium_Female;<br>Low_Male - Medium_Male;<br>Medium_Female - Medium_Male | linc TCONS_00009956 |           |           |

|     |       |                                                    |        |          |        |        |                                                                                                                                                                                                                                                                                                                                                                                                                                           |               |              |              |
|-----|-------|----------------------------------------------------|--------|----------|--------|--------|-------------------------------------------------------------------------------------------------------------------------------------------------------------------------------------------------------------------------------------------------------------------------------------------------------------------------------------------------------------------------------------------------------------------------------------------|---------------|--------------|--------------|
| 385 |       |                                                    | 2.7283 | 0.029309 | 1.533  | 0.3799 | High_Male - High_Female;<br>Low_Female - High_Female;<br>Low_Male - High_Female;<br>Medium_Female - High_Female;<br>Medium_Male - High_Female;<br>Low_Female - High_Male;<br>Low_Male - High_Male;<br>Medium_Female - High_Male;<br>High_Male - Medium_Male;<br>Low_Male - Low_Female;<br>Low_Female - Medium_Female;<br>Low_Female - Medium_Male;<br>Low_Male - Medium_Female;<br>Low_Male - Medium_Male;<br>Medium_Female - Medium_Male | A_33_P3252181 |              | AK097351     |
| 386 | NPRL3 | nitrogen permease regulator-like 3 (S. cerevisiae) | 2.7278 | 0.029334 | 1.5326 | 0.3799 | High_Female - High_Male;<br>Low_Female - High_Female;<br>Low_Male - High_Female;<br>Medium_Female - High_Female;<br>Medium_Male - High_Female;<br>Low_Female - High_Male;<br>Low_Male - High_Male;<br>Medium_Female - High_Male;<br>Medium_Male - High_Male;<br>Low_Female - Low_Male;<br>Medium_Female - Low_Female;<br>Low_Female - Medium_Male;<br>Medium_Female - Low_Male;<br>Medium_Male - Low_Male;<br>Medium_Female - Medium_Male | A_23_P100326  | NM_001039476 | NM_001039476 |

|     |                  |                                    |        |          |        |         |                                                                                                                                                                                                                                                                                                                                                                                                                                           |               |           |           |
|-----|------------------|------------------------------------|--------|----------|--------|---------|-------------------------------------------------------------------------------------------------------------------------------------------------------------------------------------------------------------------------------------------------------------------------------------------------------------------------------------------------------------------------------------------------------------------------------------------|---------------|-----------|-----------|
| 387 | SLC26A8          | solute carrier family 26, member 8 | 2.7259 | 0.029424 | 1.5313 | 0.38008 | High_Female - High_Male;<br>High_Female - Low_Female;<br>High_Female - Low_Male;<br>High_Female - Medium_Female;<br>High_Female - Medium_Male;<br>High_Male - Low_Female;<br>High_Male - Low_Male;<br>Medium_Female - High_Male;<br>Medium_Male - High_Male;<br>Low_Female - Low_Male;<br>Medium_Female - Low_Female;<br>Medium_Male - Low_Female;<br>Medium_Female - Low_Male;<br>Medium_Male - Low_Male;<br>Medium_Male - Medium_Female | A_23_P30950   | NM_052961 | NM_052961 |
| 388 | 2<br>LOC10012826 | uncharacterized LOC100128262       | 2.7209 | 0.029661 | 1.5278 | 0.38052 | High_Male - High_Female;<br>Low_Female - High_Female;<br>Low_Male - High_Female;<br>Medium_Female - High_Female;<br>Medium_Male - High_Female;<br>Low_Female - High_Male;<br>Low_Male - High_Male;<br>Medium_Female - High_Male;<br>Medium_Male - High_Male;<br>Low_Female - Low_Male;<br>Medium_Female - Low_Female;<br>Medium_Male - Low_Female;<br>Medium_Female - Low_Male;<br>Medium_Male - Low_Male;<br>Medium_Female - Medium_Male | A_21_P0014586 | XR_110396 | XR_110396 |

|     |             |                                                  |        |          |        |         |                                                                                                                                                                                                                                                                                                                                                                                                                                           |                     |              |              |
|-----|-------------|--------------------------------------------------|--------|----------|--------|---------|-------------------------------------------------------------------------------------------------------------------------------------------------------------------------------------------------------------------------------------------------------------------------------------------------------------------------------------------------------------------------------------------------------------------------------------------|---------------------|--------------|--------------|
| 389 | XLOC_004710 |                                                  | 2.7196 | 0.029725 | 1.5269 | 0.38052 | High_Male - High_Female;<br>Low_Female - High_Female;<br>Low_Male - High_Female;<br>Medium_Female - High_Female;<br>Medium_Male - High_Female;<br>Low_Female - High_Male;<br>Low_Male - High_Male;<br>High_Male - Medium_Female;<br>High_Male - Medium_Male;<br>Low_Female - Low_Male;<br>Low_Female - Medium_Female;<br>Low_Female - Medium_Male;<br>Low_Male - Medium_Female;<br>Low_Male - Medium_Male;<br>Medium_Female - Medium_Male | linc TCONS_00010248 |              |              |
| 390 | FAM129C     | family with sequence similarity 129,<br>member C | 2.718  | 0.029801 | 1.5258 | 0.38052 | High_Male - High_Female;<br>Low_Female - High_Female;<br>Low_Male - High_Female;<br>Medium_Female - High_Female;<br>Medium_Male - High_Female;<br>Low_Female - High_Male;<br>Low_Male - High_Male;<br>Medium_Female - High_Male;<br>Medium_Male - High_Male;<br>Low_Male - Low_Female;<br>Low_Female - Medium_Female;<br>Medium_Male - Low_Female;<br>Low_Male - Medium_Female;<br>Medium_Male - Low_Male;<br>Medium_Male - Medium_Female | A_33_P3350259       | NM_001098524 | NM_001098524 |

|     |                  |                                               |        |          |        |         |                                                                                                                                                                                                                                                                                                                                                                                                                                           |               |           |           |
|-----|------------------|-----------------------------------------------|--------|----------|--------|---------|-------------------------------------------------------------------------------------------------------------------------------------------------------------------------------------------------------------------------------------------------------------------------------------------------------------------------------------------------------------------------------------------------------------------------------------------|---------------|-----------|-----------|
| 391 | LOC10028958<br>0 | uncharacterized LOC100289580                  | 2.7173 | 0.029837 | 1.5253 | 0.38052 | High_Male - High_Female;<br>Low_Female - High_Female;<br>Low_Male - High_Female;<br>Medium_Female - High_Female;<br>Medium_Male - High_Female;<br>Low_Female - High_Male;<br>Low_Male - High_Male;<br>High_Male - Medium_Female;<br>High_Male - Medium_Male;<br>Low_Male - Low_Female;<br>Low_Female - Medium_Female;<br>Low_Female - Medium_Male;<br>Low_Male - Medium_Female;<br>Low_Male - Medium_Male;<br>Medium_Female - Medium_Male | A_33_P3419621 |           | AK127064  |
| 392 | CDC42EP1         | CDC42 effector protein (Rho GTPase binding) 1 | 2.7172 | 0.029839 | 1.5252 | 0.38052 | High_Male - High_Female;<br>Low_Female - High_Female;<br>Low_Male - High_Female;<br>Medium_Female - High_Female;<br>Medium_Male - High_Female;<br>High_Male - Low_Female;<br>Low_Male - High_Male;<br>Medium_Female - High_Male;<br>Medium_Male - High_Male;<br>Low_Male - Low_Female;<br>Medium_Female - Low_Female;<br>Medium_Male - Low_Female;<br>Low_Male - Medium_Female;<br>Low_Male - Medium_Male;<br>Medium_Female - Medium_Male | A_33_P3407424 | NM_152243 | NM_152243 |



|     |             |                        |        |          |        |         |                                                                                                                                                                                                                                                                                                                                                                                                                                           |                                             |           |           |
|-----|-------------|------------------------|--------|----------|--------|---------|-------------------------------------------------------------------------------------------------------------------------------------------------------------------------------------------------------------------------------------------------------------------------------------------------------------------------------------------------------------------------------------------------------------------------------------------|---------------------------------------------|-----------|-----------|
| 393 | PRR5        | proline rich 5 (renal) | 2.709  | 0.030234 | 1.5195 | 0.38458 | High_Male - High_Female;<br>Low_Female - High_Female;<br>Low_Male - High_Female;<br>Medium_Female - High_Female;<br>Medium_Male - High_Female;<br>Low_Female - High_Male;<br>Low_Male - High_Male;<br>High_Male - Medium_Female;<br>High_Male - Medium_Male;<br>Low_Male - Low_Female;<br>Low_Female - Medium_Female;<br>Low_Female - Medium_Male;<br>Low_Male - Medium_Female;<br>Low_Male - Medium_Male;<br>Medium_Female - Medium_Male | A_23_P80382                                 | NM_015366 | NM_015366 |
| 394 | XLOC_013981 |                        | 2.7052 | 0.030421 | 1.5168 | 0.38551 | High_Male - High_Female;<br>Low_Female - High_Female;<br>Low_Male - High_Female;<br>Medium_Female - High_Female;<br>Medium_Male - High_Female;<br>Low_Female - High_Male;<br>Low_Male - High_Male;<br>High_Male - Medium_Female;<br>High_Male - Medium_Male;<br>Low_Male - Low_Female;<br>Low_Female - Medium_Female;<br>Low_Female - Medium_Male;<br>Low_Male - Medium_Female;<br>Low_Male - Medium_Male;<br>Medium_Female - Medium_Male | linc TCONS_00029251 linc TC<br>ONS_00029061 |           |           |

|     |                    |  |        |          |        |         |                                                                                                                                                                                                                                                                                                                                                                                                                                           |                                                                                   |  |  |
|-----|--------------------|--|--------|----------|--------|---------|-------------------------------------------------------------------------------------------------------------------------------------------------------------------------------------------------------------------------------------------------------------------------------------------------------------------------------------------------------------------------------------------------------------------------------------------|-----------------------------------------------------------------------------------|--|--|
| 395 | XLOC_I2_0028<br>86 |  | 2.7044 | 0.030461 | 1.5162 | 0.38551 | High_Male - High_Female;<br>Low_Female - High_Female;<br>Low_Male - High_Female;<br>Medium_Female - High_Female;<br>Medium_Male - High_Female;<br>Low_Female - High_Male;<br>Low_Male - High_Male;<br>Medium_Female - High_Male;<br>High_Male - Medium_Male;<br>Low_Male - Low_Female;<br>Low_Female - Medium_Female;<br>Low_Female - Medium_Male;<br>Low_Male - Medium_Female;<br>Low_Male - Medium_Male;<br>Medium_Female - Medium_Male | tc THC2553586 linc TCONS_I<br>2_00005503                                          |  |  |
| 396 | XLOC_003839        |  | 2.7025 | 0.030554 | 1.5149 | 0.38571 | High_Female - High_Male;<br>High_Female - Low_Female;<br>High_Female - Low_Male;<br>High_Female - Medium_Female;<br>High_Female - Medium_Male;<br>Low_Female - High_Male;<br>Low_Male - High_Male;<br>Medium_Female - High_Male;<br>Medium_Male - High_Male;<br>Low_Female - Low_Male;<br>Low_Female - Medium_Female;<br>Medium_Male - Low_Female;<br>Medium_Female - Low_Male;<br>Medium_Male - Low_Male;<br>Medium_Male - Medium_Female | tc THC2771827 linc TCONS_0<br>0008387 linc TCONS_000089<br>83 linc TCONS_00008982 |  |  |

|     |                  |                       |        |          |        |         |                                                                                                                                                                                                                                                                                                                                                                                                                                           |               |              |              |
|-----|------------------|-----------------------|--------|----------|--------|---------|-------------------------------------------------------------------------------------------------------------------------------------------------------------------------------------------------------------------------------------------------------------------------------------------------------------------------------------------------------------------------------------------------------------------------------------------|---------------|--------------|--------------|
| 397 | LOC10028763<br>3 | protein FAM27E2-like  | 2.6973 | 0.030812 | 1.5113 | 0.38798 | High_Male - High_Female;<br>Low_Female - High_Female;<br>Low_Male - High_Female;<br>Medium_Female - High_Female;<br>Medium_Male - High_Female;<br>Low_Female - High_Male;<br>Low_Male - High_Male;<br>High_Male - Medium_Female;<br>High_Male - Medium_Male;<br>Low_Female - Low_Male;<br>Low_Female - Medium_Female;<br>Low_Female - Medium_Male;<br>Low_Male - Medium_Female;<br>Low_Male - Medium_Male;<br>Medium_Female - Medium_Male | A_21_P0013934 | XM_002342728 | XM_002342728 |
| 398 | TACR2            | tachykinin receptor 2 | 2.6954 | 0.030907 | 1.5099 | 0.38821 | High_Male - High_Female;<br>Low_Female - High_Female;<br>Low_Male - High_Female;<br>Medium_Female - High_Female;<br>High_Female - Medium_Male;<br>Low_Female - High_Male;<br>Low_Male - High_Male;<br>Medium_Female - High_Male;<br>High_Male - Medium_Male;<br>Low_Male - Low_Female;<br>Medium_Female - Low_Female;<br>Low_Female - Medium_Male;<br>Low_Male - Medium_Female;<br>Low_Male - Medium_Male;<br>Medium_Female - Medium_Male | A_23_P24135   | NM_001057    | NM_001057    |

|     |        |                                  |        |          |        |        |                                                                                                                                                                                                                                                                                                                                                                                                                                           |               |           |           |
|-----|--------|----------------------------------|--------|----------|--------|--------|-------------------------------------------------------------------------------------------------------------------------------------------------------------------------------------------------------------------------------------------------------------------------------------------------------------------------------------------------------------------------------------------------------------------------------------------|---------------|-----------|-----------|
| 399 | MAP7   | microtubule-associated protein 7 | 2.6889 | 0.031231 | 1.5054 | 0.3899 | High_Male - High_Female;<br>Low_Female - High_Female;<br>Low_Male - High_Female;<br>High_Female - Medium_Female;<br>High_Female - Medium_Male;<br>High_Male - Low_Female;<br>Low_Male - High_Male;<br>High_Male - Medium_Female;<br>High_Male - Medium_Male;<br>Low_Male - Low_Female;<br>Low_Female - Medium_Female;<br>Low_Female - Medium_Male;<br>Low_Male - Medium_Female;<br>Low_Male - Medium_Male;<br>Medium_Male - Medium_Female | A_33_P3375576 | NM_003980 | NM_003980 |
| 400 | MAP7D2 | MAP7 domain containing 2         | 2.6849 | 0.031431 | 1.5026 | 0.3899 | High_Male - High_Female;<br>Low_Female - High_Female;<br>Low_Male - High_Female;<br>Medium_Female - High_Female;<br>High_Female - Medium_Male;<br>Low_Female - High_Male;<br>High_Male - Low_Male;<br>Medium_Female - High_Male;<br>High_Male - Medium_Male;<br>Low_Female - Low_Male;<br>Low_Female - Medium_Female;<br>Low_Female - Medium_Male;<br>Medium_Female - Low_Male;<br>Low_Male - Medium_Male;<br>Medium_Female - Medium_Male | A_24_P7652    | NM_152780 | NM_152780 |

|     |             |                          |        |          |        |        |                                                                                                                                                                                                                                                                                                                                                                                                                                           |               |           |           |
|-----|-------------|--------------------------|--------|----------|--------|--------|-------------------------------------------------------------------------------------------------------------------------------------------------------------------------------------------------------------------------------------------------------------------------------------------------------------------------------------------------------------------------------------------------------------------------------------------|---------------|-----------|-----------|
| 401 | LOC92659    | uncharacterized LOC92659 | 2.6839 | 0.031485 | 1.5019 | 0.3899 | High_Male - High_Female;<br>Low_Female - High_Female;<br>Low_Male - High_Female;<br>Medium_Female - High_Female;<br>High_Female - Medium_Male;<br>High_Male - Low_Female;<br>Low_Male - High_Male;<br>High_Male - Medium_Female;<br>High_Male - Medium_Male;<br>Low_Male - Low_Female;<br>Medium_Female - Low_Female;<br>Low_Female - Medium_Male;<br>Low_Male - Medium_Female;<br>Low_Male - Medium_Male;<br>Medium_Female - Medium_Male | A_33_P3238543 | NR_015454 | NR_015454 |
| 402 | XLOC_006593 |                          | 2.6832 | 0.031519 | 1.5014 | 0.3899 | High_Male - High_Female;<br>Low_Female - High_Female;<br>Low_Male - High_Female;<br>Medium_Female - High_Female;<br>Medium_Male - High_Female;<br>Low_Female - High_Male;<br>Low_Male - High_Male;<br>High_Male - Medium_Female;<br>High_Male - Medium_Male;<br>Low_Female - Low_Male;<br>Low_Female - Medium_Female;<br>Low_Female - Medium_Male;<br>Low_Male - Medium_Female;<br>Low_Male - Medium_Male;<br>Medium_Female - Medium_Male | A_21_P0005332 |           | BG185100  |

|     |        |                          |        |          |        |        |                                                                                                                                                                                                                                                                                                                                                                                                                                           |                |              |              |
|-----|--------|--------------------------|--------|----------|--------|--------|-------------------------------------------------------------------------------------------------------------------------------------------------------------------------------------------------------------------------------------------------------------------------------------------------------------------------------------------------------------------------------------------------------------------------------------------|----------------|--------------|--------------|
| 403 |        |                          | 2.6829 | 0.031535 | 1.5012 | 0.3899 | High_Male - High_Female;<br>Low_Female - High_Female;<br>Low_Male - High_Female;<br>Medium_Female - High_Female;<br>Medium_Male - High_Female;<br>Low_Female - High_Male;<br>Low_Male - High_Male;<br>High_Male - Medium_Female;<br>High_Male - Medium_Male;<br>Low_Male - Low_Female;<br>Low_Female - Medium_Female;<br>Low_Female - Medium_Male;<br>Low_Male - Medium_Female;<br>Low_Male - Medium_Male;<br>Medium_Female - Medium_Male | A_19_P00319372 |              | XR_110395    |
| 404 | SH2D2A | SH2 domain containing 2A | 2.6823 | 0.031565 | 1.5008 | 0.3899 | High_Male - High_Female;<br>Low_Female - High_Female;<br>Low_Male - High_Female;<br>High_Female - Medium_Female;<br>Medium_Male - High_Female;<br>High_Male - Low_Female;<br>Low_Male - High_Male;<br>High_Male - Medium_Female;<br>Medium_Male - High_Male;<br>Low_Male - Low_Female;<br>Low_Female - Medium_Female;<br>Medium_Male - Low_Female;<br>Low_Male - Medium_Female;<br>Low_Male - Medium_Male;<br>Medium_Male - Medium_Female | A_21_P0000028  | NM_001161444 | NM_001161444 |

|     |        |                            |        |          |        |         |                                                                                                                                                                                                                                                                                                                                                                                                                                           |              |           |           |
|-----|--------|----------------------------|--------|----------|--------|---------|-------------------------------------------------------------------------------------------------------------------------------------------------------------------------------------------------------------------------------------------------------------------------------------------------------------------------------------------------------------------------------------------------------------------------------------------|--------------|-----------|-----------|
| 405 | SYNGR1 | synaptogyrin 1             | 2.6818 | 0.031588 | 1.5005 | 0.3899  | High_Male - High_Female;<br>Low_Female - High_Female;<br>Low_Male - High_Female;<br>Medium_Female - High_Female;<br>Medium_Male - High_Female;<br>Low_Female - High_Male;<br>High_Male - Low_Male;<br>Medium_Female - High_Male;<br>High_Male - Medium_Male;<br>Low_Female - Low_Male;<br>Low_Female - Medium_Female;<br>Low_Female - Medium_Male;<br>Medium_Female - Low_Male;<br>Low_Male - Medium_Male;<br>Medium_Female - Medium_Male | A_23_P348063 | NM_004711 | NM_004711 |
| 406 | E2F2   | E2F transcription factor 2 | 2.676  | 0.031888 | 1.4964 | 0.39263 | High_Female - High_Male;<br>High_Female - Low_Female;<br>Low_Male - High_Female;<br>Medium_Female - High_Female;<br>High_Female - Medium_Male;<br>Low_Female - High_Male;<br>Low_Male - High_Male;<br>Medium_Female - High_Male;<br>Medium_Male - High_Male;<br>Low_Male - Low_Female;<br>Medium_Female - Low_Female;<br>Medium_Male - Low_Female;<br>Medium_Female - Low_Male;<br>Low_Male - Medium_Male;<br>Medium_Female - Medium_Male | A_23_P408955 | NM_004091 | NM_004091 |

|     |       |                                                                    |        |          |        |         |                                                                                                                                                                                                                                                                                                                                                                                                                                           |               |           |           |
|-----|-------|--------------------------------------------------------------------|--------|----------|--------|---------|-------------------------------------------------------------------------------------------------------------------------------------------------------------------------------------------------------------------------------------------------------------------------------------------------------------------------------------------------------------------------------------------------------------------------------------------|---------------|-----------|-----------|
| 407 | RREP3 | arginine-glutamic acid dipeptide (RE)<br>repeats pseudogene 3      | 2.6687 | 0.032264 | 1.4913 | 0.39559 | High_Male - High_Female;<br>Low_Female - High_Female;<br>Low_Male - High_Female;<br>Medium_Female - High_Female;<br>Medium_Male - High_Female;<br>Low_Female - High_Male;<br>Low_Male - High_Male;<br>Medium_Female - High_Male;<br>High_Male - Medium_Male;<br>Low_Female - Low_Male;<br>Low_Female - Medium_Female;<br>Low_Female - Medium_Male;<br>Low_Male - Medium_Female;<br>Low_Male - Medium_Male;<br>Medium_Female - Medium_Male | A_33_P3259861 | NR_033735 | NR_033735 |
| 408 | OBSCN | obscurin, cytoskeletal calmodulin and titin-<br>interacting RhoGEF | 2.6682 | 0.032287 | 1.491  | 0.39559 | High_Male - High_Female;<br>Low_Female - High_Female;<br>Low_Male - High_Female;<br>Medium_Female - High_Female;<br>Medium_Male - High_Female;<br>Low_Female - High_Male;<br>Low_Male - High_Male;<br>High_Male - Medium_Female;<br>High_Male - Medium_Male;<br>Low_Male - Low_Female;<br>Low_Female - Medium_Female;<br>Low_Female - Medium_Male;<br>Low_Male - Medium_Female;<br>Low_Male - Medium_Male;<br>Medium_Female - Medium_Male | A_24_P119685  | NM_052843 | NM_052843 |



|     |       |                             |        |          |        |         |                                                                                                                                                                                                                                                                                                                                                                                                                                           |               |           |           |
|-----|-------|-----------------------------|--------|----------|--------|---------|-------------------------------------------------------------------------------------------------------------------------------------------------------------------------------------------------------------------------------------------------------------------------------------------------------------------------------------------------------------------------------------------------------------------------------------------|---------------|-----------|-----------|
| 409 |       |                             | 2.6663 | 0.032387 | 1.4896 | 0.39584 | High_Male - High_Female;<br>Low_Female - High_Female;<br>Low_Male - High_Female;<br>Medium_Female - High_Female;<br>Medium_Male - High_Female;<br>Low_Female - High_Male;<br>Low_Male - High_Male;<br>Medium_Female - High_Male;<br>High_Male - Medium_Male;<br>Low_Male - Low_Female;<br>Low_Female - Medium_Female;<br>Low_Female - Medium_Male;<br>Low_Male - Medium_Female;<br>Low_Male - Medium_Male;<br>Medium_Female - Medium_Male | A_33_P3291329 |           |           |
| 410 | ACACB | acetyl-CoA carboxylase beta | 2.6623 | 0.032598 | 1.4868 | 0.39672 | High_Male - High_Female;<br>Low_Female - High_Female;<br>Low_Male - High_Female;<br>Medium_Female - High_Female;<br>Medium_Male - High_Female;<br>High_Male - Low_Female;<br>High_Male - Low_Male;<br>High_Male - Medium_Female;<br>Medium_Male - High_Male;<br>Low_Male - Low_Female;<br>Medium_Female - Low_Female;<br>Medium_Male - Low_Female;<br>Low_Male - Medium_Female;<br>Medium_Male - Low_Male;<br>Medium_Male - Medium_Female | A_33_P3334220 | NM_001093 | NM_001093 |

|     |      |             |        |          |        |         |                                                                                                                                                                                                                                                                                                                                                                                                                                           |               |           |           |
|-----|------|-------------|--------|----------|--------|---------|-------------------------------------------------------------------------------------------------------------------------------------------------------------------------------------------------------------------------------------------------------------------------------------------------------------------------------------------------------------------------------------------------------------------------------------------|---------------|-----------|-----------|
| 411 |      |             | 2.6606 | 0.032685 | 1.4857 | 0.39672 | High_Male - High_Female;<br>Low_Female - High_Female;<br>Low_Male - High_Female;<br>Medium_Female - High_Female;<br>Medium_Male - High_Female;<br>Low_Female - High_Male;<br>Low_Male - High_Male;<br>Medium_Female - High_Male;<br>High_Male - Medium_Male;<br>Low_Female - Low_Male;<br>Low_Female - Medium_Female;<br>Low_Female - Medium_Male;<br>Medium_Female - Low_Male;<br>Low_Male - Medium_Male;<br>Medium_Female - Medium_Male | A_33_P3392927 |           | AB529253  |
| 412 | CST2 | cystatin SA | 2.6595 | 0.032747 | 1.4848 | 0.39672 | High_Male - High_Female;<br>Low_Female - High_Female;<br>Low_Male - High_Female;<br>Medium_Female - High_Female;<br>High_Female - Medium_Male;<br>Low_Female - High_Male;<br>Low_Male - High_Male;<br>Medium_Female - High_Male;<br>High_Male - Medium_Male;<br>Low_Female - Low_Male;<br>Low_Female - Medium_Female;<br>Low_Female - Medium_Male;<br>Medium_Female - Low_Male;<br>Low_Male - Medium_Male;<br>Medium_Female - Medium_Male | A_24_P237175  | NM_001322 | NM_001322 |

|     |             |  |        |          |        |         |                                                                                                                                                                                                                                                                                                                                                                                                                                           |                                   |          |
|-----|-------------|--|--------|----------|--------|---------|-------------------------------------------------------------------------------------------------------------------------------------------------------------------------------------------------------------------------------------------------------------------------------------------------------------------------------------------------------------------------------------------------------------------------------------------|-----------------------------------|----------|
| 413 | XLOC_009389 |  | 2.6553 | 0.032966 | 1.4819 | 0.39672 | High_Female - High_Male;<br>Low_Female - High_Female;<br>High_Female - Low_Male;<br>Medium_Female - High_Female;<br>High_Female - Medium_Male;<br>Low_Female - High_Male;<br>Low_Male - High_Male;<br>Medium_Female - High_Male;<br>Medium_Male - High_Male;<br>Low_Female - Low_Male;<br>Medium_Female - Low_Female;<br>Low_Female - Medium_Male;<br>Medium_Female - Low_Male;<br>Medium_Male - Low_Male;<br>Medium_Female - Medium_Male | tc THC2788642 linc TCONS_00019588 |          |
| 414 |             |  | 2.655  | 0.032981 | 1.4817 | 0.39672 | High_Female - High_Male;<br>High_Female - Low_Female;<br>Low_Male - High_Female;<br>Medium_Female - High_Female;<br>High_Female - Medium_Male;<br>Low_Female - High_Male;<br>Low_Male - High_Male;<br>Medium_Female - High_Male;<br>High_Male - Medium_Male;<br>Low_Male - Low_Female;<br>Medium_Female - Low_Female;<br>Low_Female - Medium_Male;<br>Medium_Female - Low_Male;<br>Low_Male - Medium_Male;<br>Medium_Female - Medium_Male | A_33_P3250750                     | CU677518 |

|     |                  |                                                   |        |          |        |         |                                                                                                                                                                                                                                                                                                                                                                                                                                           |               |              |              |
|-----|------------------|---------------------------------------------------|--------|----------|--------|---------|-------------------------------------------------------------------------------------------------------------------------------------------------------------------------------------------------------------------------------------------------------------------------------------------------------------------------------------------------------------------------------------------------------------------------------------------|---------------|--------------|--------------|
| 415 | LOC10012825<br>2 | uncharacterized LOC100128252                      | 2.6549 | 0.032987 | 1.4817 | 0.39672 | High_Male - High_Female;<br>Low_Female - High_Female;<br>Low_Male - High_Female;<br>Medium_Female - High_Female;<br>Medium_Male - High_Female;<br>Low_Female - High_Male;<br>Low_Male - High_Male;<br>Medium_Female - High_Male;<br>Medium_Male - High_Male;<br>Low_Male - Low_Female;<br>Medium_Female - Low_Female;<br>Medium_Male - Low_Female;<br>Low_Male - Medium_Female;<br>Medium_Male - Low_Male;<br>Medium_Male - Medium_Female | A_33_P3259973 | NR_036522    | NR_036522    |
| 416 | SYCE3            | synaptonemal complex central element<br>protein 3 | 2.6543 | 0.033022 | 1.4812 | 0.39672 | High_Female - High_Male;<br>High_Female - Low_Female;<br>High_Female - Low_Male;<br>High_Female - Medium_Female;<br>High_Female - Medium_Male;<br>Low_Female - High_Male;<br>High_Male - Low_Male;<br>High_Male - Medium_Female;<br>High_Male - Medium_Male;<br>Low_Female - Low_Male;<br>Low_Female - Medium_Female;<br>Low_Female - Medium_Male;<br>Low_Male - Medium_Female;<br>Low_Male - Medium_Male;<br>Medium_Female - Medium_Male | A_33_P3250887 | NM_001123225 | NM_001123225 |

|     |       |                                                                   |        |          |        |         |                                                                                                                                                                                                                                                                                                                                                                                                                                           |               |           |           |
|-----|-------|-------------------------------------------------------------------|--------|----------|--------|---------|-------------------------------------------------------------------------------------------------------------------------------------------------------------------------------------------------------------------------------------------------------------------------------------------------------------------------------------------------------------------------------------------------------------------------------------------|---------------|-----------|-----------|
| 417 | CCL3  | chemokine (C-C motif) ligand 3                                    | 2.6529 | 0.033093 | 1.4803 | 0.39672 | High_Male - High_Female;<br>Low_Female - High_Female;<br>Low_Male - High_Female;<br>Medium_Female - High_Female;<br>Medium_Male - High_Female;<br>Low_Female - High_Male;<br>Low_Male - High_Male;<br>High_Male - Medium_Female;<br>High_Male - Medium_Male;<br>Low_Male - Low_Female;<br>Low_Female - Medium_Female;<br>Low_Female - Medium_Male;<br>Low_Male - Medium_Female;<br>Low_Male - Medium_Male;<br>Medium_Female - Medium_Male | A_33_P3316273 | NM_002983 | NM_002983 |
| 418 | NEAT1 | nuclear paraspeckle assembly transcript 1<br>(non-protein coding) | 2.6411 | 0.033729 | 1.472  | 0.40338 | High_Female - High_Male;<br>Low_Female - High_Female;<br>Low_Male - High_Female;<br>High_Female - Medium_Female;<br>Medium_Male - High_Female;<br>Low_Female - High_Male;<br>Low_Male - High_Male;<br>Medium_Female - High_Male;<br>Medium_Male - High_Male;<br>Low_Male - Low_Female;<br>Low_Female - Medium_Female;<br>Low_Female - Medium_Male;<br>Low_Male - Medium_Female;<br>Low_Male - Medium_Male;<br>Medium_Male - Medium_Female | A_33_P3263538 |           | AF001893  |

|     |           |                                 |        |          |        |         |                                                                                                                                                                                                                                                                                                                                                                                                                                           |             |           |           |
|-----|-----------|---------------------------------|--------|----------|--------|---------|-------------------------------------------------------------------------------------------------------------------------------------------------------------------------------------------------------------------------------------------------------------------------------------------------------------------------------------------------------------------------------------------------------------------------------------------|-------------|-----------|-----------|
| 419 | GBP3      | guanylate binding protein 3     | 2.6376 | 0.033919 | 1.4696 | 0.40468 | High_Male - High_Female;<br>High_Female - Low_Female;<br>High_Female - Low_Male;<br>High_Female - Medium_Female;<br>High_Female - Medium_Male;<br>High_Male - Low_Female;<br>High_Male - Low_Male;<br>High_Male - Medium_Female;<br>High_Male - Medium_Male;<br>Low_Female - Low_Male;<br>Low_Female - Medium_Female;<br>Low_Female - Medium_Male;<br>Medium_Female - Low_Male;<br>Medium_Male - Low_Male;<br>Medium_Male - Medium_Female | A_23_P51487 | NM_018284 | NM_018284 |
| 420 | KRTAP4-12 | keratin associated protein 4-12 | 2.6359 | 0.034014 | 1.4683 | 0.40485 | High_Male - High_Female;<br>Low_Female - High_Female;<br>Low_Male - High_Female;<br>Medium_Female - High_Female;<br>Medium_Male - High_Female;<br>Low_Female - High_Male;<br>Low_Male - High_Male;<br>High_Male - Medium_Female;<br>High_Male - Medium_Male;<br>Low_Female - Low_Male;<br>Low_Female - Medium_Female;<br>Low_Female - Medium_Male;<br>Low_Male - Medium_Female;<br>Low_Male - Medium_Male;<br>Medium_Female - Medium_Male | A_23_P15798 | NM_031854 | NM_031854 |

|     |             |                            |        |          |        |         |                                                                                                                                                                                                                                                                                                                                                                                                                                           |                     |           |           |
|-----|-------------|----------------------------|--------|----------|--------|---------|-------------------------------------------------------------------------------------------------------------------------------------------------------------------------------------------------------------------------------------------------------------------------------------------------------------------------------------------------------------------------------------------------------------------------------------------|---------------------|-----------|-----------|
| 421 | XLOC_012571 |                            | 2.6343 | 0.034102 | 1.4672 | 0.40493 | High_Male - High_Female;<br>Low_Female - High_Female;<br>Low_Male - High_Female;<br>High_Female - Medium_Female;<br>High_Female - Medium_Male;<br>Low_Female - High_Male;<br>High_Male - Low_Male;<br>High_Male - Medium_Female;<br>High_Male - Medium_Male;<br>Low_Female - Low_Male;<br>Low_Female - Medium_Female;<br>Low_Female - Medium_Male;<br>Low_Male - Medium_Female;<br>Low_Male - Medium_Male;<br>Medium_Female - Medium_Male | linc TCONS_00025761 |           |           |
| 422 | TMEM176B    | transmembrane protein 176B | 2.6318 | 0.034238 | 1.4655 | 0.40558 | High_Male - High_Female;<br>Low_Female - High_Female;<br>Low_Male - High_Female;<br>Medium_Female - High_Female;<br>Medium_Male - High_Female;<br>High_Male - Low_Female;<br>High_Male - Low_Male;<br>Medium_Female - High_Male;<br>High_Male - Medium_Male;<br>Low_Male - Low_Female;<br>Medium_Female - Low_Female;<br>Medium_Male - Low_Female;<br>Medium_Female - Low_Male;<br>Low_Male - Medium_Male;<br>Medium_Female - Medium_Male | A_23_P157007        | NM_014020 | NM_014020 |

|     |           |                                                                    |        |          |        |         |                                                                                                                                                                                                                                                                                                                                                                                                                                           |               |           |           |
|-----|-----------|--------------------------------------------------------------------|--------|----------|--------|---------|-------------------------------------------------------------------------------------------------------------------------------------------------------------------------------------------------------------------------------------------------------------------------------------------------------------------------------------------------------------------------------------------------------------------------------------------|---------------|-----------|-----------|
| 423 | HLA-DRB6  | major histocompatibility complex, class II, DR beta 6 (pseudogene) | 2.6293 | 0.034379 | 1.4637 | 0.40628 | High_Male - High_Female;<br>Low_Female - High_Female;<br>Low_Male - High_Female;<br>Medium_Female - High_Female;<br>Medium_Male - High_Female;<br>High_Male - Low_Female;<br>High_Male - Low_Male;<br>High_Male - Medium_Female;<br>Medium_Male - High_Male;<br>Low_Female - Low_Male;<br>Low_Female - Medium_Female;<br>Medium_Male - Low_Female;<br>Low_Male - Medium_Female;<br>Medium_Male - Low_Male;<br>Medium_Male - Medium_Female | A_24_P169013  | NR_001298 | NR_001298 |
| 424 | LOC389906 | zinc finger protein 839 pseudogene                                 | 2.625  | 0.034618 | 1.4607 | 0.40815 | High_Female - High_Male;<br>High_Female - Low_Female;<br>High_Female - Low_Male;<br>High_Female - Medium_Female;<br>High_Female - Medium_Male;<br>Low_Female - High_Male;<br>High_Male - Low_Male;<br>Medium_Female - High_Male;<br>High_Male - Medium_Male;<br>Low_Female - Low_Male;<br>Medium_Female - Low_Female;<br>Low_Female - Medium_Male;<br>Medium_Female - Low_Male;<br>Low_Male - Medium_Male;<br>Medium_Female - Medium_Male | A_33_P3325229 | NR_034031 | NR_034031 |



|     |             |                        |        |          |        |         |                                                                                                                                                                                                                                                                                                                                                                                                                                           |                     |           |           |
|-----|-------------|------------------------|--------|----------|--------|---------|-------------------------------------------------------------------------------------------------------------------------------------------------------------------------------------------------------------------------------------------------------------------------------------------------------------------------------------------------------------------------------------------------------------------------------------------|---------------------|-----------|-----------|
| 425 | XLOC_007868 |                        | 2.6219 | 0.034792 | 1.4585 | 0.40923 | High_Male - High_Female;<br>Low_Female - High_Female;<br>Low_Male - High_Female;<br>Medium_Female - High_Female;<br>Medium_Male - High_Female;<br>Low_Female - High_Male;<br>Low_Male - High_Male;<br>High_Male - Medium_Female;<br>High_Male - Medium_Male;<br>Low_Male - Low_Female;<br>Low_Female - Medium_Female;<br>Low_Female - Medium_Male;<br>Low_Male - Medium_Female;<br>Low_Male - Medium_Male;<br>Medium_Female - Medium_Male | linc TCONS_00016491 |           |           |
| 426 | HEBP1       | heme binding protein 1 | 2.6147 | 0.035192 | 1.4536 | 0.41193 | High_Male - High_Female;<br>Low_Female - High_Female;<br>High_Female - Low_Male;<br>Medium_Female - High_Female;<br>Medium_Male - High_Female;<br>High_Male - Low_Female;<br>High_Male - Low_Male;<br>Medium_Female - High_Male;<br>Medium_Male - High_Male;<br>Low_Female - Low_Male;<br>Medium_Female - Low_Female;<br>Medium_Male - Low_Female;<br>Medium_Female - Low_Male;<br>Medium_Male - Low_Male;<br>Medium_Female - Medium_Male | A_23_P117082        | NM_015987 | NM_015987 |

|     |        |                                                       |        |          |        |         |                                                                                                                                                                                                                                                                                                                                                                                                                                           |               |           |           |
|-----|--------|-------------------------------------------------------|--------|----------|--------|---------|-------------------------------------------------------------------------------------------------------------------------------------------------------------------------------------------------------------------------------------------------------------------------------------------------------------------------------------------------------------------------------------------------------------------------------------------|---------------|-----------|-----------|
| 427 | TREML1 | triggering receptor expressed on myeloid cells-like 1 | 2.6144 | 0.035211 | 1.4533 | 0.41193 | High_Female - High_Male;<br>High_Female - Low_Female;<br>High_Female - Low_Male;<br>Medium_Female - High_Female;<br>High_Female - Medium_Male;<br>Low_Female - High_Male;<br>Low_Male - High_Male;<br>Medium_Female - High_Male;<br>Medium_Male - High_Male;<br>Low_Female - Low_Male;<br>Medium_Female - Low_Female;<br>Low_Female - Medium_Male;<br>Medium_Female - Low_Male;<br>Medium_Male - Low_Male;<br>Medium_Female - Medium_Male | A_33_P3381777 | NM_178174 | NM_178174 |
| 428 | KIRREL | kin of IRRE like (Drosophila)                         | 2.6114 | 0.035381 | 1.4512 | 0.41193 | High_Male - High_Female;<br>Low_Female - High_Female;<br>Low_Male - High_Female;<br>Medium_Female - High_Female;<br>High_Female - Medium_Male;<br>Low_Female - High_Male;<br>High_Male - Low_Male;<br>Medium_Female - High_Male;<br>High_Male - Medium_Male;<br>Low_Female - Low_Male;<br>Medium_Female - Low_Female;<br>Low_Female - Medium_Male;<br>Medium_Female - Low_Male;<br>Low_Male - Medium_Male;<br>Medium_Female - Medium_Male | A_33_P3221489 | NM_018240 | NM_018240 |

|     |             |                        |        |          |        |         |                                                                                                                                                                                                                                                                                                                                                                                                                                           |                     |           |           |
|-----|-------------|------------------------|--------|----------|--------|---------|-------------------------------------------------------------------------------------------------------------------------------------------------------------------------------------------------------------------------------------------------------------------------------------------------------------------------------------------------------------------------------------------------------------------------------------------|---------------------|-----------|-----------|
| 429 | XLOC_009000 |                        | 2.6107 | 0.03542  | 1.4507 | 0.41193 | High_Male - High_Female;<br>Low_Female - High_Female;<br>Low_Male - High_Female;<br>Medium_Female - High_Female;<br>High_Female - Medium_Male;<br>Low_Female - High_Male;<br>Low_Male - High_Male;<br>High_Male - Medium_Female;<br>High_Male - Medium_Male;<br>Low_Female - Low_Male;<br>Low_Female - Medium_Female;<br>Low_Female - Medium_Male;<br>Low_Male - Medium_Female;<br>Low_Male - Medium_Male;<br>Medium_Female - Medium_Male | linc TCONS_00018649 |           |           |
| 430 | POU4F2      | POU class 4 homeobox 2 | 2.6105 | 0.035433 | 1.4506 | 0.41193 | High_Male - High_Female;<br>Low_Female - High_Female;<br>High_Female - Low_Male;<br>Medium_Female - High_Female;<br>High_Female - Medium_Male;<br>Low_Female - High_Male;<br>High_Male - Low_Male;<br>High_Male - Medium_Female;<br>High_Male - Medium_Male;<br>Low_Female - Low_Male;<br>Low_Female - Medium_Female;<br>Low_Female - Medium_Male;<br>Medium_Female - Low_Male;<br>Medium_Male - Low_Male;<br>Medium_Female - Medium_Male | A_23_P302038        | NM_004575 | NM_004575 |

|     |             |                                               |        |          |        |         |                                                                                                                                                                                                                                                                                                                                                                                                                                           |                     |           |           |
|-----|-------------|-----------------------------------------------|--------|----------|--------|---------|-------------------------------------------------------------------------------------------------------------------------------------------------------------------------------------------------------------------------------------------------------------------------------------------------------------------------------------------------------------------------------------------------------------------------------------------|---------------------|-----------|-----------|
| 431 | LINC00482   | long intergenic non-protein coding RNA<br>482 | 2.6087 | 0.035535 | 1.4493 | 0.41206 | High_Female - High_Male;<br>High_Female - Low_Female;<br>High_Female - Low_Male;<br>High_Female - Medium_Female;<br>High_Female - Medium_Male;<br>High_Male - Low_Female;<br>High_Male - Low_Male;<br>High_Male - Medium_Female;<br>High_Male - Medium_Male;<br>Low_Female - Low_Male;<br>Low_Female - Medium_Female;<br>Medium_Male - Low_Female;<br>Medium_Female - Low_Male;<br>Medium_Male - Low_Male;<br>Medium_Male - Medium_Female | A_24_P323084        | NR_038080 | NR_038080 |
| 432 | XLOC_004093 |                                               | 2.6074 | 0.035609 | 1.4484 | 0.41206 | High_Male - High_Female;<br>Low_Female - High_Female;<br>Low_Male - High_Female;<br>Medium_Female - High_Female;<br>High_Female - Medium_Male;<br>Low_Female - High_Male;<br>Low_Male - High_Male;<br>Medium_Female - High_Male;<br>High_Male - Medium_Male;<br>Low_Female - Low_Male;<br>Low_Female - Medium_Female;<br>Low_Female - Medium_Male;<br>Low_Male - Medium_Female;<br>Low_Male - Medium_Male;<br>Medium_Female - Medium_Male | linc TCONS_00008588 |           |           |

|     |             |                              |        |          |        |         |                                                                                                                                                                                                                                                                                                                                                                                                                                           |                |           |           |
|-----|-------------|------------------------------|--------|----------|--------|---------|-------------------------------------------------------------------------------------------------------------------------------------------------------------------------------------------------------------------------------------------------------------------------------------------------------------------------------------------------------------------------------------------------------------------------------------------|----------------|-----------|-----------|
| 433 | XLOC_006756 |                              | 2.6048 | 0.035759 | 1.4466 | 0.41284 | High_Male - High_Female;<br>Low_Female - High_Female;<br>Low_Male - High_Female;<br>Medium_Female - High_Female;<br>Medium_Male - High_Female;<br>High_Male - Low_Female;<br>Low_Male - High_Male;<br>Medium_Female - High_Male;<br>High_Male - Medium_Male;<br>Low_Male - Low_Female;<br>Medium_Female - Low_Female;<br>Low_Female - Medium_Male;<br>Low_Male - Medium_Female;<br>Low_Male - Medium_Male;<br>Medium_Female - Medium_Male | A_19_P00315554 |           | BC015784  |
| 434 | GFRA1       | GDNF family receptor alpha 1 | 2.602  | 0.035922 | 1.4446 | 0.41323 | High_Male - High_Female;<br>High_Female - Low_Female;<br>High_Female - Low_Male;<br>High_Female - Medium_Female;<br>High_Female - Medium_Male;<br>High_Male - Low_Female;<br>High_Male - Low_Male;<br>High_Male - Medium_Female;<br>High_Male - Medium_Male;<br>Low_Female - Low_Male;<br>Low_Female - Medium_Female;<br>Medium_Male - Low_Female;<br>Medium_Female - Low_Male;<br>Medium_Male - Low_Male;<br>Medium_Male - Medium_Female | A_33_P3293336  | NM_005264 | NM_005264 |

|     |             |                                             |        |          |        |         |                                                                                                                                                                                                                                                                                                                                                                                                                                           |                |           |           |
|-----|-------------|---------------------------------------------|--------|----------|--------|---------|-------------------------------------------------------------------------------------------------------------------------------------------------------------------------------------------------------------------------------------------------------------------------------------------------------------------------------------------------------------------------------------------------------------------------------------------|----------------|-----------|-----------|
| 435 | 5           | LOC10050696<br>uncharacterized LOC100506965 | 2.6004 | 0.036016 | 1.4435 | 0.41323 | High_Female - High_Male;<br>Low_Female - High_Female;<br>Low_Male - High_Female;<br>High_Female - Medium_Female;<br>Medium_Male - High_Female;<br>Low_Female - High_Male;<br>Low_Male - High_Male;<br>Medium_Female - High_Male;<br>Medium_Male - High_Male;<br>Low_Male - Low_Female;<br>Low_Female - Medium_Female;<br>Low_Female - Medium_Male;<br>Low_Male - Medium_Female;<br>Low_Male - Medium_Male;<br>Medium_Male - Medium_Female | A_19_P00803019 | XR_110300 | XR_110300 |
| 436 | XLOC_000762 |                                             | 2.5999 | 0.036041 | 1.4432 | 0.41323 | High_Male - High_Female;<br>Low_Female - High_Female;<br>Low_Male - High_Female;<br>Medium_Female - High_Female;<br>Medium_Male - High_Female;<br>Low_Female - High_Male;<br>Low_Male - High_Male;<br>High_Male - Medium_Female;<br>High_Male - Medium_Male;<br>Low_Female - Low_Male;<br>Low_Female - Medium_Female;<br>Low_Female - Medium_Male;<br>Low_Male - Medium_Female;<br>Low_Male - Medium_Male;<br>Medium_Female - Medium_Male | A_21_P0001486  |           | AA773613  |

|     |         |                                                  |        |          |        |         |                                                                                                                                                                                                                                                                                                                                                                                                                                           |               |              |              |
|-----|---------|--------------------------------------------------|--------|----------|--------|---------|-------------------------------------------------------------------------------------------------------------------------------------------------------------------------------------------------------------------------------------------------------------------------------------------------------------------------------------------------------------------------------------------------------------------------------------------|---------------|--------------|--------------|
| 437 |         |                                                  | 2.5962 | 0.03626  | 1.4406 | 0.41429 | High_Male - High_Female;<br>Low_Female - High_Female;<br>Low_Male - High_Female;<br>Medium_Female - High_Female;<br>Medium_Male - High_Female;<br>High_Male - Low_Female;<br>High_Male - Low_Male;<br>Medium_Female - High_Male;<br>High_Male - Medium_Male;<br>Low_Female - Low_Male;<br>Medium_Female - Low_Female;<br>Low_Female - Medium_Male;<br>Medium_Female - Low_Male;<br>Medium_Male - Low_Male;<br>Medium_Female - Medium_Male | A_33_P3287862 |              | AK301306     |
| 438 | FAM27E3 | family with sequence similarity 27,<br>member E3 | 2.5955 | 0.036299 | 1.4401 | 0.41429 | High_Female - High_Male;<br>High_Female - Low_Female;<br>High_Female - Low_Male;<br>High_Female - Medium_Female;<br>Medium_Male - High_Female;<br>High_Male - Low_Female;<br>High_Male - Low_Male;<br>High_Male - Medium_Female;<br>Medium_Male - High_Male;<br>Low_Female - Low_Male;<br>Medium_Female - Low_Female;<br>Medium_Male - Low_Female;<br>Medium_Female - Low_Male;<br>Medium_Male - Low_Male;<br>Medium_Male - Medium_Female | A_32_P112623  | XM_001720463 | XM_001720463 |

|     |         |                                           |        |          |        |         |                                                                                                                                                                                                                                                                                                                                                                                                                                           |               |           |           |
|-----|---------|-------------------------------------------|--------|----------|--------|---------|-------------------------------------------------------------------------------------------------------------------------------------------------------------------------------------------------------------------------------------------------------------------------------------------------------------------------------------------------------------------------------------------------------------------------------------------|---------------|-----------|-----------|
| 439 | DDX43   | DEAD (Asp-Glu-Ala-Asp) box polypeptide 43 | 2.5932 | 0.036438 | 1.4385 | 0.41492 | High_Male - High_Female;<br>High_Female - Low_Female;<br>Low_Male - High_Female;<br>Medium_Female - High_Female;<br>Medium_Male - High_Female;<br>High_Male - Low_Female;<br>Low_Male - High_Male;<br>High_Male - Medium_Female;<br>Medium_Male - High_Male;<br>Low_Male - Low_Female;<br>Medium_Female - Low_Female;<br>Medium_Male - Low_Female;<br>Low_Male - Medium_Female;<br>Low_Male - Medium_Male;<br>Medium_Male - Medium_Female | A_23_P156445  | NM_018665 | NM_018665 |
| 440 | CSNK1G2 | casein kinase 1, gamma 2                  | 2.5898 | 0.036638 | 1.4361 | 0.41625 | High_Male - High_Female;<br>Low_Female - High_Female;<br>Low_Male - High_Female;<br>Medium_Female - High_Female;<br>Medium_Male - High_Female;<br>Low_Female - High_Male;<br>Low_Male - High_Male;<br>High_Male - Medium_Female;<br>High_Male - Medium_Male;<br>Low_Male - Low_Female;<br>Low_Female - Medium_Female;<br>Low_Female - Medium_Male;<br>Low_Male - Medium_Female;<br>Low_Male - Medium_Male;<br>Medium_Female - Medium_Male | A_33_P3259017 | NM_001319 | NM_001319 |



|     |             |                                          |        |          |        |         |                                                                                                                                                                                                                                                                                                                                                                                                                                           |                     |              |              |
|-----|-------------|------------------------------------------|--------|----------|--------|---------|-------------------------------------------------------------------------------------------------------------------------------------------------------------------------------------------------------------------------------------------------------------------------------------------------------------------------------------------------------------------------------------------------------------------------------------------|---------------------|--------------|--------------|
| 441 | MPP1        | membrane protein, palmitoylated 1, 55kDa | 2.5855 | 0.036887 | 1.4331 | 0.41814 | High_Female - High_Male;<br>Low_Female - High_Female;<br>Low_Male - High_Female;<br>Medium_Female - High_Female;<br>Medium_Male - High_Female;<br>Low_Female - High_Male;<br>Low_Male - High_Male;<br>Medium_Female - High_Male;<br>Medium_Male - High_Male;<br>Low_Female - Low_Male;<br>Low_Female - Medium_Female;<br>Low_Female - Medium_Male;<br>Low_Male - Medium_Female;<br>Low_Male - Medium_Male;<br>Medium_Female - Medium_Male | A_33_P3247858       | NM_001166461 | NM_001166461 |
| 442 | XLOC_004188 |                                          | 2.5767 | 0.037419 | 1.4269 | 0.42321 | High_Male - High_Female;<br>Low_Female - High_Female;<br>Low_Male - High_Female;<br>Medium_Female - High_Female;<br>High_Female - Medium_Male;<br>Low_Female - High_Male;<br>Low_Male - High_Male;<br>High_Male - Medium_Female;<br>High_Male - Medium_Male;<br>Low_Female - Low_Male;<br>Low_Female - Medium_Female;<br>Low_Female - Medium_Male;<br>Low_Male - Medium_Female;<br>Low_Male - Medium_Male;<br>Medium_Female - Medium_Male | linc TCONS_00008670 |              |              |

|     |       |                                                  |        |          |        |         |                                                                                                                                                                                                                                                                                                                                                                                                                                           |               |           |           |
|-----|-------|--------------------------------------------------|--------|----------|--------|---------|-------------------------------------------------------------------------------------------------------------------------------------------------------------------------------------------------------------------------------------------------------------------------------------------------------------------------------------------------------------------------------------------------------------------------------------------|---------------|-----------|-----------|
| 443 | PAQR9 | progesterin and adipoQ receptor family member IX | 2.5719 | 0.037707 | 1.4236 | 0.4255  | High_Female - High_Male;<br>High_Female - Low_Female;<br>High_Female - Low_Male;<br>High_Female - Medium_Female;<br>High_Female - Medium_Male;<br>Low_Female - High_Male;<br>Low_Male - High_Male;<br>Medium_Female - High_Male;<br>Medium_Male - High_Male;<br>Low_Female - Low_Male;<br>Medium_Female - Low_Female;<br>Medium_Male - Low_Female;<br>Medium_Female - Low_Male;<br>Medium_Male - Low_Male;<br>Medium_Female - Medium_Male | A_32_P196193  | NM_198504 | NM_198504 |
| 444 | 6     | uncharacterized LOC100506546                     | 2.5671 | 0.038    | 1.4202 | 0.42636 | High_Male - High_Female;<br>High_Female - Low_Female;<br>High_Female - Low_Male;<br>High_Female - Medium_Female;<br>Medium_Male - High_Female;<br>High_Male - Low_Female;<br>High_Male - Low_Male;<br>High_Male - Medium_Female;<br>Medium_Male - High_Male;<br>Low_Male - Low_Female;<br>Medium_Female - Low_Female;<br>Medium_Male - Low_Female;<br>Low_Male - Medium_Female;<br>Medium_Male - Low_Male;<br>Medium_Male - Medium_Female | A_21_P0014063 | XR_108325 | XR_108325 |

|     |       |                                                     |        |          |        |         |                                                                                                                                                                                                                                                                                                                                                                                                                                           |               |              |              |
|-----|-------|-----------------------------------------------------|--------|----------|--------|---------|-------------------------------------------------------------------------------------------------------------------------------------------------------------------------------------------------------------------------------------------------------------------------------------------------------------------------------------------------------------------------------------------------------------------------------------------|---------------|--------------|--------------|
| 445 | OR8G2 | olfactory receptor, family 8, subfamily G, member 2 | 2.5654 | 0.038101 | 1.4191 | 0.42636 | High_Male - High_Female;<br>Low_Female - High_Female;<br>Low_Male - High_Female;<br>Medium_Female - High_Female;<br>Medium_Male - High_Female;<br>Low_Female - High_Male;<br>High_Male - Low_Male;<br>Medium_Female - High_Male;<br>High_Male - Medium_Male;<br>Low_Female - Low_Male;<br>Low_Female - Medium_Female;<br>Low_Female - Medium_Male;<br>Medium_Female - Low_Male;<br>Low_Male - Medium_Male;<br>Medium_Female - Medium_Male | A_33_P3262089 | NM_001007249 | NM_001007249 |
| 446 | KANK2 | KN motif and ankyrin repeat domains 2               | 2.565  | 0.038126 | 1.4188 | 0.42636 | High_Female - High_Male;<br>High_Female - Low_Female;<br>High_Female - Low_Male;<br>Medium_Female - High_Female;<br>High_Female - Medium_Male;<br>Low_Female - High_Male;<br>Low_Male - High_Male;<br>Medium_Female - High_Male;<br>Medium_Male - High_Male;<br>Low_Male - Low_Female;<br>Medium_Female - Low_Female;<br>Medium_Male - Low_Female;<br>Medium_Female - Low_Male;<br>Low_Male - Medium_Male;<br>Medium_Female - Medium_Male | A_23_P50426   | NM_015493    | NM_015493    |

|     |                |                                               |        |          |        |         |                                                                                                                                                                                                                                                                                                                                                                                                                                           |                                                                      |              |              |
|-----|----------------|-----------------------------------------------|--------|----------|--------|---------|-------------------------------------------------------------------------------------------------------------------------------------------------------------------------------------------------------------------------------------------------------------------------------------------------------------------------------------------------------------------------------------------------------------------------------------------|----------------------------------------------------------------------|--------------|--------------|
| 447 | LOC652119      | double homeobox protein 4-like protein 4-like | 2.5636 | 0.038212 | 1.4178 | 0.42636 | High_Male - High_Female;<br>Low_Female - High_Female;<br>Low_Male - High_Female;<br>Medium_Female - High_Female;<br>Medium_Male - High_Female;<br>Low_Female - High_Male;<br>Low_Male - High_Male;<br>High_Male - Medium_Female;<br>High_Male - Medium_Male;<br>Low_Male - Low_Female;<br>Low_Female - Medium_Female;<br>Low_Female - Medium_Male;<br>Low_Male - Medium_Female;<br>Low_Male - Medium_Male;<br>Medium_Male - Medium_Female | A_33_P3417123                                                        | XM_001720798 | XM_001720798 |
| 448 | XLOC_I2_001421 |                                               | 2.5628 | 0.038266 | 1.4172 | 0.42636 | High_Male - High_Female;<br>Low_Female - High_Female;<br>Low_Male - High_Female;<br>Medium_Female - High_Female;<br>Medium_Male - High_Female;<br>Low_Female - High_Male;<br>High_Male - Low_Male;<br>High_Male - Medium_Female;<br>High_Male - Medium_Male;<br>Low_Female - Low_Male;<br>Low_Female - Medium_Female;<br>Low_Female - Medium_Male;<br>Medium_Female - Low_Male;<br>Low_Male - Medium_Male;<br>Medium_Female - Medium_Male | linc TCONS_I2_00002836 linc TCONS_I2_00002838 linc TCONS_I2_00002835 |              |              |

|     |             |  |        |          |        |         |                                                                                                                                                                                                                                                                                                                                                                                                                                           |               |  |          |
|-----|-------------|--|--------|----------|--------|---------|-------------------------------------------------------------------------------------------------------------------------------------------------------------------------------------------------------------------------------------------------------------------------------------------------------------------------------------------------------------------------------------------------------------------------------------------|---------------|--|----------|
| 449 |             |  | 2.5623 | 0.038295 | 1.4169 | 0.42636 | High_Male - High_Female;<br>Low_Female - High_Female;<br>Low_Male - High_Female;<br>Medium_Female - High_Female;<br>High_Female - Medium_Male;<br>Low_Female - High_Male;<br>Low_Male - High_Male;<br>High_Male - Medium_Female;<br>High_Male - Medium_Male;<br>Low_Female - Low_Male;<br>Low_Female - Medium_Female;<br>Low_Female - Medium_Male;<br>Low_Male - Medium_Female;<br>Low_Male - Medium_Male;<br>Medium_Female - Medium_Male | A_33_P3395310 |  | BX096650 |
| 450 | XLOC_009255 |  | 2.5575 | 0.038593 | 1.4135 | 0.42709 | High_Female - High_Male;<br>High_Female - Low_Female;<br>Low_Male - High_Female;<br>Medium_Female - High_Female;<br>High_Female - Medium_Male;<br>Low_Female - High_Male;<br>Low_Male - High_Male;<br>Medium_Female - High_Male;<br>High_Male - Medium_Male;<br>Low_Male - Low_Female;<br>Medium_Female - Low_Female;<br>Low_Female - Medium_Male;<br>Medium_Female - Low_Male;<br>Low_Male - Medium_Male;<br>Medium_Female - Medium_Male | A_21_P0007129 |  | AK055250 |

|     |          |                                                               |        |         |        |         |                                                                                                                                                                                                                                                                                                                                                                                                                                           |               |              |              |
|-----|----------|---------------------------------------------------------------|--------|---------|--------|---------|-------------------------------------------------------------------------------------------------------------------------------------------------------------------------------------------------------------------------------------------------------------------------------------------------------------------------------------------------------------------------------------------------------------------------------------------|---------------|--------------|--------------|
| 451 |          |                                                               | 2.5561 | 0.03868 | 1.4125 | 0.42709 | High_Male - High_Female;<br>Low_Female - High_Female;<br>Low_Male - High_Female;<br>Medium_Female - High_Female;<br>Medium_Male - High_Female;<br>High_Male - Low_Female;<br>Low_Male - High_Male;<br>High_Male - Medium_Female;<br>High_Male - Medium_Male;<br>Low_Male - Low_Female;<br>Low_Female - Medium_Female;<br>Medium_Male - Low_Female;<br>Low_Male - Medium_Female;<br>Low_Male - Medium_Male;<br>Medium_Male - Medium_Female | A_33_P3346333 |              |              |
| 452 | CEACAM18 | carcinoembryonic antigen-related cell<br>adhesion molecule 18 | 2.5548 | 0.03876 | 1.4116 | 0.42709 | High_Male - High_Female;<br>Low_Female - High_Female;<br>Low_Male - High_Female;<br>Medium_Female - High_Female;<br>High_Female - Medium_Male;<br>High_Male - Low_Female;<br>Low_Male - High_Male;<br>Medium_Female - High_Male;<br>High_Male - Medium_Male;<br>Low_Male - Low_Female;<br>Medium_Female - Low_Female;<br>Low_Female - Medium_Male;<br>Low_Male - Medium_Female;<br>Low_Male - Medium_Male;<br>Medium_Female - Medium_Male | A_33_P3249818 | NM_001080405 | NM_001080405 |

|     |       |                                       |        |          |        |         |                                                                                                                                                                                                                                                                                                                                                                                                                                           |               |           |           |
|-----|-------|---------------------------------------|--------|----------|--------|---------|-------------------------------------------------------------------------------------------------------------------------------------------------------------------------------------------------------------------------------------------------------------------------------------------------------------------------------------------------------------------------------------------------------------------------------------------|---------------|-----------|-----------|
| 453 | PDE2A | phosphodiesterase 2A, cGMP-stimulated | 2.5502 | 0.039047 | 1.4084 | 0.42709 | High_Female - High_Male;<br>High_Female - Low_Female;<br>High_Female - Low_Male;<br>High_Female - Medium_Female;<br>High_Female - Medium_Male;<br>Low_Female - High_Male;<br>Low_Male - High_Male;<br>Medium_Female - High_Male;<br>High_Male - Medium_Male;<br>Low_Female - Low_Male;<br>Medium_Female - Low_Female;<br>Low_Female - Medium_Male;<br>Medium_Female - Low_Male;<br>Low_Male - Medium_Male;<br>Medium_Female - Medium_Male | A_23_P401106  | NM_002599 | NM_002599 |
| 454 | DACH1 | dachshund homolog 1 (Drosophila)      | 2.5494 | 0.039098 | 1.4078 | 0.42709 | High_Male - High_Female;<br>High_Female - Low_Female;<br>High_Female - Low_Male;<br>High_Female - Medium_Female;<br>Medium_Male - High_Female;<br>High_Male - Low_Female;<br>High_Male - Low_Male;<br>High_Male - Medium_Female;<br>High_Male - Medium_Male;<br>Low_Male - Low_Female;<br>Medium_Female - Low_Female;<br>Medium_Male - Low_Female;<br>Medium_Female - Low_Male;<br>Medium_Male - Low_Male;<br>Medium_Male - Medium_Female | A_33_P3316786 | NM_080759 | NM_080759 |

|     |             |                             |        |          |        |         |                                                                                                                                                                                                                                                                                                                                                                                                                                           |               |           |           |
|-----|-------------|-----------------------------|--------|----------|--------|---------|-------------------------------------------------------------------------------------------------------------------------------------------------------------------------------------------------------------------------------------------------------------------------------------------------------------------------------------------------------------------------------------------------------------------------------------------|---------------|-----------|-----------|
| 455 | XLOC_005780 |                             | 2.5474 | 0.039222 | 1.4065 | 0.42709 | High_Female - High_Male;<br>Low_Female - High_Female;<br>High_Female - Low_Male;<br>High_Female - Medium_Female;<br>Medium_Male - High_Female;<br>Low_Female - High_Male;<br>Low_Male - High_Male;<br>Medium_Female - High_Male;<br>Medium_Male - High_Male;<br>Low_Female - Low_Male;<br>Low_Female - Medium_Female;<br>Medium_Male - Low_Female;<br>Low_Male - Medium_Female;<br>Medium_Male - Low_Male;<br>Medium_Male - Medium_Female | A_21_P0004765 |           | BF507452  |
| 456 | HPR         | haptoglobin-related protein | 2.547  | 0.039251 | 1.4061 | 0.42709 | High_Male - High_Female;<br>High_Female - Low_Female;<br>High_Female - Low_Male;<br>Medium_Female - High_Female;<br>High_Female - Medium_Male;<br>High_Male - Low_Female;<br>High_Male - Low_Male;<br>Medium_Female - High_Male;<br>High_Male - Medium_Male;<br>Low_Female - Low_Male;<br>Medium_Female - Low_Female;<br>Medium_Male - Low_Female;<br>Medium_Female - Low_Male;<br>Medium_Male - Low_Male;<br>Medium_Female - Medium_Male | A_33_P3289236 | NM_020995 | NM_020995 |



|     |      |               |        |          |        |         |                                                                                                                                                                                                                                                                                                                                                                                                                                           |               |           |           |
|-----|------|---------------|--------|----------|--------|---------|-------------------------------------------------------------------------------------------------------------------------------------------------------------------------------------------------------------------------------------------------------------------------------------------------------------------------------------------------------------------------------------------------------------------------------------------|---------------|-----------|-----------|
| 457 | CD24 | CD24 molecule | 2.5464 | 0.03929  | 1.4057 | 0.42709 | High_Male - High_Female;<br>High_Female - Low_Female;<br>High_Female - Low_Male;<br>Medium_Female - High_Female;<br>Medium_Male - High_Female;<br>High_Male - Low_Female;<br>High_Male - Low_Male;<br>High_Male - Medium_Female;<br>Medium_Male - High_Male;<br>Low_Male - Low_Female;<br>Medium_Female - Low_Female;<br>Medium_Male - Low_Female;<br>Medium_Female - Low_Male;<br>Medium_Male - Low_Male;<br>Medium_Male - Medium_Female | A_33_P3369844 | NM_013230 | NM_013230 |
| 458 | TNS1 | tensin 1      | 2.5457 | 0.039331 | 1.4053 | 0.42709 | High_Female - High_Male;<br>Low_Female - High_Female;<br>Low_Male - High_Female;<br>High_Female - Medium_Female;<br>High_Female - Medium_Male;<br>Low_Female - High_Male;<br>Low_Male - High_Male;<br>Medium_Female - High_Male;<br>High_Male - Medium_Male;<br>Low_Male - Low_Female;<br>Low_Female - Medium_Female;<br>Low_Female - Medium_Male;<br>Low_Male - Medium_Female;<br>Low_Male - Medium_Male;<br>Medium_Female - Medium_Male | A_24_P105733  | NM_022648 | NM_022648 |

|     |      |                                    |        |          |        |         |                                                                                                                                                                                                                                                                                                                                                                                                                                           |               |           |           |
|-----|------|------------------------------------|--------|----------|--------|---------|-------------------------------------------------------------------------------------------------------------------------------------------------------------------------------------------------------------------------------------------------------------------------------------------------------------------------------------------------------------------------------------------------------------------------------------------|---------------|-----------|-----------|
| 459 | PI16 | peptidase inhibitor 16             | 2.5446 | 0.039402 | 1.4045 | 0.42709 | High_Female - High_Male;<br>High_Female - Low_Female;<br>High_Female - Low_Male;<br>High_Female - Medium_Female;<br>High_Female - Medium_Male;<br>Low_Female - High_Male;<br>Low_Male - High_Male;<br>Medium_Female - High_Male;<br>High_Male - Medium_Male;<br>Low_Female - Low_Male;<br>Medium_Female - Low_Female;<br>Low_Female - Medium_Male;<br>Medium_Female - Low_Male;<br>Low_Male - Medium_Male;<br>Medium_Female - Medium_Male | A_33_P3215640 | NM_153370 | NM_153370 |
| 460 | EYA1 | eyes absent homolog 1 (Drosophila) | 2.5429 | 0.039512 | 1.4033 | 0.42709 | High_Male - High_Female;<br>Low_Female - High_Female;<br>Low_Male - High_Female;<br>Medium_Female - High_Female;<br>Medium_Male - High_Female;<br>Low_Female - High_Male;<br>Low_Male - High_Male;<br>High_Male - Medium_Female;<br>High_Male - Medium_Male;<br>Low_Female - Low_Male;<br>Low_Female - Medium_Female;<br>Low_Female - Medium_Male;<br>Low_Male - Medium_Female;<br>Low_Male - Medium_Male;<br>Medium_Female - Medium_Male | A_33_P3366667 | NM_000503 | NM_000503 |

|     |                    |                   |        |          |        |         |                                                                                                                                                                                                                                                                                                                                                                                                                                           |                                                                             |          |
|-----|--------------------|-------------------|--------|----------|--------|---------|-------------------------------------------------------------------------------------------------------------------------------------------------------------------------------------------------------------------------------------------------------------------------------------------------------------------------------------------------------------------------------------------------------------------------------------------|-----------------------------------------------------------------------------|----------|
| 461 | BMS1P5             | BMS1 pseudogene 5 | 2.5415 | 0.039599 | 1.4023 | 0.42709 | High_Female - High_Male;<br>Low_Female - High_Female;<br>Low_Male - High_Female;<br>Medium_Female - High_Female;<br>Medium_Male - High_Female;<br>Low_Female - High_Male;<br>Low_Male - High_Male;<br>Medium_Female - High_Male;<br>Medium_Male - High_Male;<br>Low_Male - Low_Female;<br>Low_Female - Medium_Female;<br>Medium_Male - Low_Female;<br>Low_Male - Medium_Female;<br>Low_Male - Medium_Male;<br>Medium_Male - Medium_Female | A_21_P0010877                                                               | BC065722 |
| 462 | XLOC_I2_0144<br>23 |                   | 2.5415 | 0.0396   | 1.4023 | 0.42709 | High_Male - High_Female;<br>Low_Female - High_Female;<br>Low_Male - High_Female;<br>Medium_Female - High_Female;<br>Medium_Male - High_Female;<br>High_Male - Low_Female;<br>Low_Male - High_Male;<br>Medium_Female - High_Male;<br>Medium_Male - High_Male;<br>Low_Male - Low_Female;<br>Medium_Female - Low_Female;<br>Medium_Male - Low_Female;<br>Low_Male - Medium_Female;<br>Low_Male - Medium_Male;<br>Medium_Male - Medium_Female | ens ENST00000522393 ens E<br>NST00000523017 tc THC2542<br>402 tc THC2521390 |          |

|     |             |  |        |          |        |         |                                                                                                                                                                                                                                                                                                                                                                                                                                           |                                                               |  |          |
|-----|-------------|--|--------|----------|--------|---------|-------------------------------------------------------------------------------------------------------------------------------------------------------------------------------------------------------------------------------------------------------------------------------------------------------------------------------------------------------------------------------------------------------------------------------------------|---------------------------------------------------------------|--|----------|
| 463 | XLOC_010366 |  | 2.5409 | 0.039634 | 1.4019 | 0.42709 | High_Male - High_Female;<br>Low_Female - High_Female;<br>Low_Male - High_Female;<br>Medium_Female - High_Female;<br>Medium_Male - High_Female;<br>Low_Female - High_Male;<br>Low_Male - High_Male;<br>High_Male - Medium_Female;<br>High_Male - Medium_Male;<br>Low_Female - Low_Male;<br>Low_Female - Medium_Female;<br>Low_Female - Medium_Male;<br>Low_Male - Medium_Female;<br>Low_Male - Medium_Male;<br>Medium_Female - Medium_Male | ens ENST00000425609 tc TH<br>C2707351 linc TCONS_00021<br>542 |  |          |
| 464 | XLOC_005900 |  | 2.5405 | 0.039662 | 1.4016 | 0.42709 | High_Female - High_Male;<br>High_Female - Low_Female;<br>High_Female - Low_Male;<br>Medium_Female - High_Female;<br>High_Female - Medium_Male;<br>High_Male - Low_Female;<br>High_Male - Low_Male;<br>Medium_Female - High_Male;<br>High_Male - Medium_Male;<br>Low_Female - Low_Male;<br>Medium_Female - Low_Female;<br>Medium_Male - Low_Female;<br>Medium_Female - Low_Male;<br>Medium_Male - Low_Male;<br>Medium_Female - Medium_Male | A_21_P0004617                                                 |  | AK130765 |

|     |       |                                                  |        |          |        |         |                                                                                                                                                                                                                                                                                                                                                                                                                                           |              |           |           |
|-----|-------|--------------------------------------------------|--------|----------|--------|---------|-------------------------------------------------------------------------------------------------------------------------------------------------------------------------------------------------------------------------------------------------------------------------------------------------------------------------------------------------------------------------------------------------------------------------------------------|--------------|-----------|-----------|
| 465 | HOXA9 | homeobox A9                                      | 2.5386 | 0.039785 | 1.4003 | 0.42709 | High_Male - High_Female;<br>High_Female - Low_Female;<br>Low_Male - High_Female;<br>Medium_Female - High_Female;<br>Medium_Male - High_Female;<br>High_Male - Low_Female;<br>High_Male - Low_Male;<br>High_Male - Medium_Female;<br>High_Male - Medium_Male;<br>Low_Male - Low_Female;<br>Medium_Female - Low_Female;<br>Medium_Male - Low_Female;<br>Medium_Female - Low_Male;<br>Medium_Male - Low_Male;<br>Medium_Female - Medium_Male | A_23_P500998 | NM_152739 | NM_152739 |
| 466 | SMR3A | submaxillary gland androgen regulated protein 3A | 2.5374 | 0.03986  | 1.3995 | 0.42709 | High_Male - High_Female;<br>Low_Female - High_Female;<br>Low_Male - High_Female;<br>Medium_Female - High_Female;<br>Medium_Male - High_Female;<br>Low_Female - High_Male;<br>Low_Male - High_Male;<br>High_Male - Medium_Female;<br>High_Male - Medium_Male;<br>Low_Male - Low_Female;<br>Low_Female - Medium_Female;<br>Low_Female - Medium_Male;<br>Low_Male - Medium_Female;<br>Low_Male - Medium_Male;<br>Medium_Female - Medium_Male | A_23_P41365  | NM_012390 | NM_012390 |

|     |             |  |        |          |        |         |                                                                                                                                                                                                                                                                                                                                                                                                                                           |                                       |          |
|-----|-------------|--|--------|----------|--------|---------|-------------------------------------------------------------------------------------------------------------------------------------------------------------------------------------------------------------------------------------------------------------------------------------------------------------------------------------------------------------------------------------------------------------------------------------------|---------------------------------------|----------|
| 467 | XLOC_005981 |  | 2.5363 | 0.039933 | 1.3987 | 0.42709 | High_Male - High_Female;<br>High_Female - Low_Female;<br>High_Female - Low_Male;<br>High_Female - Medium_Female;<br>Medium_Male - High_Female;<br>High_Male - Low_Female;<br>High_Male - Low_Male;<br>High_Male - Medium_Female;<br>High_Male - Medium_Male;<br>Low_Female - Low_Male;<br>Medium_Female - Low_Female;<br>Medium_Male - Low_Female;<br>Medium_Female - Low_Male;<br>Medium_Male - Low_Male;<br>Medium_Male - Medium_Female | A_19_P00315705                        | BG434565 |
| 468 |             |  | 2.5355 | 0.039984 | 1.3981 | 0.42709 | High_Female - High_Male;<br>High_Female - Low_Female;<br>High_Female - Low_Male;<br>High_Female - Medium_Female;<br>High_Female - Medium_Male;<br>Low_Female - High_Male;<br>Low_Male - High_Male;<br>Medium_Female - High_Male;<br>High_Male - Medium_Male;<br>Low_Female - Low_Male;<br>Low_Female - Medium_Female;<br>Low_Female - Medium_Male;<br>Low_Male - Medium_Female;<br>Low_Male - Medium_Male;<br>Medium_Female - Medium_Male | ens ENST00000471090 tc TH<br>C2518594 |          |

|     |           |                           |        |          |        |         |                                                                                                                                                                                                                                                                                                                                                                                                                                           |                                             |          |
|-----|-----------|---------------------------|--------|----------|--------|---------|-------------------------------------------------------------------------------------------------------------------------------------------------------------------------------------------------------------------------------------------------------------------------------------------------------------------------------------------------------------------------------------------------------------------------------------------|---------------------------------------------|----------|
| 469 | LOC158863 | uncharacterized LOC158863 | 2.53   | 0.040336 | 1.3943 | 0.42993 | High_Female - High_Male;<br>Low_Female - High_Female;<br>Low_Male - High_Female;<br>Medium_Female - High_Female;<br>Medium_Male - High_Female;<br>Low_Female - High_Male;<br>Low_Male - High_Male;<br>Medium_Female - High_Male;<br>Medium_Male - High_Male;<br>Low_Male - Low_Female;<br>Low_Female - Medium_Female;<br>Low_Female - Medium_Male;<br>Low_Male - Medium_Female;<br>Low_Male - Medium_Male;<br>Medium_Male - Medium_Female | A_33_P3576797                               | AL110203 |
| 470 |           |                           | 2.5241 | 0.040726 | 1.3901 | 0.43177 | High_Male - High_Female;<br>Low_Female - High_Female;<br>Low_Male - High_Female;<br>Medium_Female - High_Female;<br>Medium_Male - High_Female;<br>High_Male - Low_Female;<br>High_Male - Low_Male;<br>High_Male - Medium_Female;<br>High_Male - Medium_Male;<br>Low_Male - Low_Female;<br>Low_Female - Medium_Female;<br>Low_Female - Medium_Male;<br>Low_Male - Medium_Female;<br>Low_Male - Medium_Male;<br>Medium_Female - Medium_Male | ens ENST00000513564 ens E<br>NST00000505967 |          |

|     |       |                         |        |          |        |         |                                                                                                                                                                                                                                                                                                                                                                                                                                           |               |           |           |
|-----|-------|-------------------------|--------|----------|--------|---------|-------------------------------------------------------------------------------------------------------------------------------------------------------------------------------------------------------------------------------------------------------------------------------------------------------------------------------------------------------------------------------------------------------------------------------------------|---------------|-----------|-----------|
| 471 | MGLL  | monoglyceride lipase    | 2.5238 | 0.04074  | 1.39   | 0.43177 | High_Female - High_Male;<br>High_Female - Low_Female;<br>High_Female - Low_Male;<br>High_Female - Medium_Female;<br>High_Female - Medium_Male;<br>Low_Female - High_Male;<br>Low_Male - High_Male;<br>Medium_Female - High_Male;<br>Medium_Male - High_Male;<br>Low_Female - Low_Male;<br>Low_Female - Medium_Female;<br>Low_Female - Medium_Male;<br>Medium_Female - Low_Male;<br>Low_Male - Medium_Male;<br>Medium_Female - Medium_Male | A_33_P3281795 | NM_007283 | NM_007283 |
| 472 | BEND7 | BEN domain containing 7 | 2.5234 | 0.040767 | 1.3897 | 0.43177 | High_Male - High_Female;<br>High_Female - Low_Female;<br>High_Female - Low_Male;<br>Medium_Female - High_Female;<br>Medium_Male - High_Female;<br>High_Male - Low_Female;<br>High_Male - Low_Male;<br>High_Male - Medium_Female;<br>High_Male - Medium_Male;<br>Low_Male - Low_Female;<br>Medium_Female - Low_Female;<br>Medium_Male - Low_Female;<br>Medium_Female - Low_Male;<br>Medium_Male - Low_Male;<br>Medium_Female - Medium_Male | A_23_P312358  | NM_152751 | NM_152751 |



|     |             |                  |        |          |        |         |                                                                                                                                                                                                                                                                                                                                                                                                                                           |                                             |           |           |
|-----|-------------|------------------|--------|----------|--------|---------|-------------------------------------------------------------------------------------------------------------------------------------------------------------------------------------------------------------------------------------------------------------------------------------------------------------------------------------------------------------------------------------------------------------------------------------------|---------------------------------------------|-----------|-----------|
| 473 | XLOC_000884 |                  | 2.5169 | 0.0412   | 1.3851 | 0.43509 | High_Male - High_Female;<br>Low_Female - High_Female;<br>Low_Male - High_Female;<br>Medium_Female - High_Female;<br>High_Female - Medium_Male;<br>Low_Female - High_Male;<br>Low_Male - High_Male;<br>Medium_Female - High_Male;<br>High_Male - Medium_Male;<br>Low_Male - Low_Female;<br>Low_Female - Medium_Female;<br>Low_Female - Medium_Male;<br>Low_Male - Medium_Female;<br>Low_Male - Medium_Male;<br>Medium_Female - Medium_Male | ens ENST00000420549 linc T<br>CONS_00000554 |           |           |
| 474 | LTF         | lactotransferrin | 2.5154 | 0.041298 | 1.3841 | 0.43509 | High_Female - High_Male;<br>High_Female - Low_Female;<br>High_Female - Low_Male;<br>Medium_Female - High_Female;<br>High_Female - Medium_Male;<br>High_Male - Low_Female;<br>High_Male - Low_Male;<br>Medium_Female - High_Male;<br>High_Male - Medium_Male;<br>Low_Male - Low_Female;<br>Medium_Female - Low_Female;<br>Medium_Male - Low_Female;<br>Medium_Female - Low_Male;<br>Low_Male - Medium_Male;<br>Medium_Female - Medium_Male | A_23_P166848                                | NM_002343 | NM_002343 |

|     |       |                                                    |        |          |        |         |                                                                                                                                                                                                                                                                                                                                                                                                                                           |              |              |              |
|-----|-------|----------------------------------------------------|--------|----------|--------|---------|-------------------------------------------------------------------------------------------------------------------------------------------------------------------------------------------------------------------------------------------------------------------------------------------------------------------------------------------------------------------------------------------------------------------------------------------|--------------|--------------|--------------|
| 475 | CMTM5 | CKLF-like MARVEL transmembrane domain containing 5 | 2.5123 | 0.041502 | 1.3819 | 0.43509 | High_Female - High_Male;<br>Low_Female - High_Female;<br>High_Female - Low_Male;<br>Medium_Female - High_Female;<br>High_Female - Medium_Male;<br>Low_Female - High_Male;<br>Low_Male - High_Male;<br>Medium_Female - High_Male;<br>Medium_Male - High_Male;<br>Low_Female - Low_Male;<br>Low_Female - Medium_Female;<br>Low_Female - Medium_Male;<br>Medium_Female - Low_Male;<br>Low_Male - Medium_Male;<br>Medium_Female - Medium_Male | A_23_P106042 | NM_001037288 | NM_001037288 |
| 476 | CCL2  | chemokine (C-C motif) ligand 2                     | 2.5119 | 0.04153  | 1.3816 | 0.43509 | High_Male - High_Female;<br>Low_Female - High_Female;<br>Low_Male - High_Female;<br>Medium_Female - High_Female;<br>Medium_Male - High_Female;<br>High_Male - Low_Female;<br>High_Male - Low_Male;<br>High_Male - Medium_Female;<br>High_Male - Medium_Male;<br>Low_Male - Low_Female;<br>Low_Female - Medium_Female;<br>Medium_Male - Low_Female;<br>Low_Male - Medium_Female;<br>Medium_Male - Low_Male;<br>Medium_Male - Medium_Female | A_23_P89431  | NM_002982    | NM_002982    |

|     |             |                                               |        |          |        |         |                                                                                                                                                                                                                                                                                                                                                                                                                                           |                     |           |           |
|-----|-------------|-----------------------------------------------|--------|----------|--------|---------|-------------------------------------------------------------------------------------------------------------------------------------------------------------------------------------------------------------------------------------------------------------------------------------------------------------------------------------------------------------------------------------------------------------------------------------------|---------------------|-----------|-----------|
| 477 | KREMEN1     | kringle containing transmembrane protein<br>1 | 2.5114 | 0.041565 | 1.3813 | 0.43509 | High_Female - High_Male;<br>High_Female - Low_Female;<br>High_Female - Low_Male;<br>High_Female - Medium_Female;<br>High_Female - Medium_Male;<br>Low_Female - High_Male;<br>High_Male - Low_Male;<br>Medium_Female - High_Male;<br>Medium_Male - High_Male;<br>Low_Female - Low_Male;<br>Low_Female - Medium_Female;<br>Low_Female - Medium_Male;<br>Medium_Female - Low_Male;<br>Medium_Male - Low_Male;<br>Medium_Male - Medium_Female | A_33_P3262431       | NM_032045 | NM_032045 |
| 478 | XLOC_006277 |                                               | 2.5096 | 0.041684 | 1.38   | 0.43509 | High_Female - High_Male;<br>High_Female - Low_Female;<br>High_Female - Low_Male;<br>High_Female - Medium_Female;<br>High_Female - Medium_Male;<br>High_Male - Low_Female;<br>High_Male - Low_Male;<br>Medium_Female - High_Male;<br>Medium_Male - High_Male;<br>Low_Female - Low_Male;<br>Medium_Female - Low_Female;<br>Medium_Male - Low_Female;<br>Medium_Female - Low_Male;<br>Medium_Male - Low_Male;<br>Medium_Male - Medium_Female | linc TCONS_00013611 |           |           |

|     |             |                              |        |          |        |         |                                                                                                                                                                                                                                                                                                                                                                                                                                           |                     |           |           |
|-----|-------------|------------------------------|--------|----------|--------|---------|-------------------------------------------------------------------------------------------------------------------------------------------------------------------------------------------------------------------------------------------------------------------------------------------------------------------------------------------------------------------------------------------------------------------------------------------|---------------------|-----------|-----------|
| 479 | LOC10019093 | uncharacterized LOC100190939 | 2.5066 | 0.041884 | 1.378  | 0.43509 | High_Male - High_Female;<br>Low_Female - High_Female;<br>Low_Male - High_Female;<br>Medium_Female - High_Female;<br>High_Female - Medium_Male;<br>Low_Female - High_Male;<br>Low_Male - High_Male;<br>Medium_Female - High_Male;<br>High_Male - Medium_Male;<br>Low_Male - Low_Female;<br>Medium_Female - Low_Female;<br>Low_Female - Medium_Male;<br>Low_Male - Medium_Female;<br>Low_Male - Medium_Male;<br>Medium_Female - Medium_Male | A_21_P0008060       | NR_024458 | NR_024458 |
| 480 | XLOC_013744 |                              | 2.5066 | 0.041889 | 1.3779 | 0.43509 | High_Male - High_Female;<br>Low_Female - High_Female;<br>Low_Male - High_Female;<br>Medium_Female - High_Female;<br>Medium_Male - High_Female;<br>High_Male - Low_Female;<br>High_Male - Low_Male;<br>High_Male - Medium_Female;<br>High_Male - Medium_Male;<br>Low_Female - Low_Male;<br>Low_Female - Medium_Female;<br>Low_Female - Medium_Male;<br>Low_Male - Medium_Female;<br>Low_Male - Medium_Male;<br>Medium_Female - Medium_Male | linc TCONS_00028390 |           |           |

|     |      |                                  |        |          |        |         |                                                                                                                                                                                                                                                                                                                                                                                                                                           |               |              |              |
|-----|------|----------------------------------|--------|----------|--------|---------|-------------------------------------------------------------------------------------------------------------------------------------------------------------------------------------------------------------------------------------------------------------------------------------------------------------------------------------------------------------------------------------------------------------------------------------------|---------------|--------------|--------------|
| 481 |      |                                  | 2.5058 | 0.041944 | 1.3773 | 0.43509 | High_Male - High_Female;<br>High_Female - Low_Female;<br>High_Female - Low_Male;<br>High_Female - Medium_Female;<br>Medium_Male - High_Female;<br>High_Male - Low_Female;<br>High_Male - Low_Male;<br>High_Male - Medium_Female;<br>Medium_Male - High_Male;<br>Low_Male - Low_Female;<br>Medium_Female - Low_Female;<br>Medium_Male - Low_Female;<br>Medium_Female - Low_Male;<br>Medium_Male - Low_Male;<br>Medium_Male - Medium_Female | A_33_P3340852 |              | S55273       |
| 482 | CCR2 | chemokine (C-C motif) receptor 2 | 2.5045 | 0.042032 | 1.3764 | 0.43509 | High_Female - High_Male;<br>High_Female - Low_Female;<br>High_Female - Low_Male;<br>Medium_Female - High_Female;<br>High_Female - Medium_Male;<br>High_Male - Low_Female;<br>High_Male - Low_Male;<br>Medium_Female - High_Male;<br>High_Male - Medium_Male;<br>Low_Female - Low_Male;<br>Medium_Female - Low_Female;<br>Low_Female - Medium_Male;<br>Medium_Female - Low_Male;<br>Medium_Male - Low_Male;<br>Medium_Female - Medium_Male | A_23_P212354  | NM_001123041 | NM_001123041 |

|     |             |                                     |        |          |        |         |                                                                                                                                                                                                                                                                                                                                                                                                                                           |                                             |           |           |
|-----|-------------|-------------------------------------|--------|----------|--------|---------|-------------------------------------------------------------------------------------------------------------------------------------------------------------------------------------------------------------------------------------------------------------------------------------------------------------------------------------------------------------------------------------------------------------------------------------------|---------------------------------------------|-----------|-----------|
| 483 | XLOC_008079 |                                     | 2.5043 | 0.04204  | 1.3763 | 0.43509 | High_Female - High_Male;<br>High_Female - Low_Female;<br>High_Female - Low_Male;<br>High_Female - Medium_Female;<br>High_Female - Medium_Male;<br>High_Male - Low_Female;<br>High_Male - Low_Male;<br>Medium_Female - High_Male;<br>Medium_Male - High_Male;<br>Low_Female - Low_Male;<br>Medium_Female - Low_Female;<br>Medium_Male - Low_Female;<br>Medium_Female - Low_Male;<br>Medium_Male - Low_Male;<br>Medium_Female - Medium_Male | ens ENST00000498732 linc T<br>CONS_00017468 |           |           |
| 484 | LRG1        | leucine-rich alpha-2-glycoprotein 1 | 2.5031 | 0.042125 | 1.3755 | 0.43509 | High_Female - High_Male;<br>High_Female - Low_Female;<br>High_Female - Low_Male;<br>High_Female - Medium_Female;<br>High_Female - Medium_Male;<br>High_Male - Low_Female;<br>High_Male - Low_Male;<br>High_Male - Medium_Female;<br>High_Male - Medium_Male;<br>Low_Female - Low_Male;<br>Medium_Female - Low_Female;<br>Medium_Male - Low_Female;<br>Medium_Female - Low_Male;<br>Medium_Male - Low_Male;<br>Medium_Female - Medium_Male | A_23_P50638                                 | NM_052972 | NM_052972 |

|     |   |             |                              |        |          |        |         |                                                                                                                                                                                                                                                                                                                                                                                                                                           |               |           |           |
|-----|---|-------------|------------------------------|--------|----------|--------|---------|-------------------------------------------------------------------------------------------------------------------------------------------------------------------------------------------------------------------------------------------------------------------------------------------------------------------------------------------------------------------------------------------------------------------------------------------|---------------|-----------|-----------|
| 485 | 7 | LOC10050585 |                              | 2.5    | 0.042334 | 1.3733 | 0.43635 | High_Male - High_Female;<br>Low_Female - High_Female;<br>Low_Male - High_Female;<br>Medium_Female - High_Female;<br>Medium_Male - High_Female;<br>Low_Female - High_Male;<br>Low_Male - High_Male;<br>High_Male - Medium_Female;<br>Medium_Male - High_Male;<br>Low_Female - Low_Male;<br>Low_Female - Medium_Female;<br>Low_Female - Medium_Male;<br>Low_Male - Medium_Female;<br>Low_Male - Medium_Male;<br>Medium_Male - Medium_Female | A_21_P0014925 |           | DA569430  |
| 486 | 2 | LOC10012825 | uncharacterized LOC100128252 | 2.4978 | 0.042483 | 1.3718 | 0.43698 | High_Male - High_Female;<br>Low_Female - High_Female;<br>Low_Male - High_Female;<br>Medium_Female - High_Female;<br>Medium_Male - High_Female;<br>Low_Female - High_Male;<br>Low_Male - High_Male;<br>High_Male - Medium_Female;<br>Medium_Male - High_Male;<br>Low_Male - Low_Female;<br>Low_Female - Medium_Female;<br>Medium_Male - Low_Female;<br>Low_Male - Medium_Female;<br>Medium_Male - Low_Male;<br>Medium_Male - Medium_Female | A_32_P204795  | NR_036522 | NR_036522 |

|     |         |                                    |        |          |        |         |                                                                                                                                                                                                                                                                                                                                                                                                                                           |               |           |           |
|-----|---------|------------------------------------|--------|----------|--------|---------|-------------------------------------------------------------------------------------------------------------------------------------------------------------------------------------------------------------------------------------------------------------------------------------------------------------------------------------------------------------------------------------------------------------------------------------------|---------------|-----------|-----------|
| 487 | C9orf29 | chromosome 9 open reading frame 29 | 2.49   | 0.043022 | 1.3663 | 0.44161 | High_Male - High_Female;<br>Low_Female - High_Female;<br>Low_Male - High_Female;<br>Medium_Female - High_Female;<br>Medium_Male - High_Female;<br>Low_Female - High_Male;<br>Low_Male - High_Male;<br>Medium_Female - High_Male;<br>High_Male - Medium_Male;<br>Low_Male - Low_Female;<br>Low_Female - Medium_Female;<br>Low_Female - Medium_Male;<br>Low_Male - Medium_Female;<br>Low_Male - Medium_Male;<br>Medium_Female - Medium_Male | A_33_P3399438 | NR_034087 | NR_034087 |
| 488 | CAV2    | caveolin 2                         | 2.4871 | 0.04322  | 1.3643 | 0.44274 | High_Male - High_Female;<br>Low_Female - High_Female;<br>Low_Male - High_Female;<br>Medium_Female - High_Female;<br>High_Female - Medium_Male;<br>Low_Female - High_Male;<br>High_Male - Low_Male;<br>High_Male - Medium_Female;<br>High_Male - Medium_Male;<br>Low_Female - Low_Male;<br>Low_Female - Medium_Female;<br>Low_Female - Medium_Male;<br>Medium_Female - Low_Male;<br>Low_Male - Medium_Male;<br>Medium_Female - Medium_Male | A_23_P123071  | NM_001233 | NM_001233 |



|     |                  |                                                                                     |        |          |        |         |                                                                                                                                                                                                                                                                                                                                                                                                                                           |             |              |              |
|-----|------------------|-------------------------------------------------------------------------------------|--------|----------|--------|---------|-------------------------------------------------------------------------------------------------------------------------------------------------------------------------------------------------------------------------------------------------------------------------------------------------------------------------------------------------------------------------------------------------------------------------------------------|-------------|--------------|--------------|
| 489 | LOC10065306<br>0 | putative POM121-like protein 1-like                                                 | 2.4844 | 0.043409 | 1.3624 | 0.44289 | High_Female - High_Male;<br>High_Female - Low_Female;<br>High_Female - Low_Male;<br>Medium_Female - High_Female;<br>High_Female - Medium_Male;<br>Low_Female - High_Male;<br>High_Male - Low_Male;<br>Medium_Female - High_Male;<br>High_Male - Medium_Male;<br>Low_Female - Low_Male;<br>Medium_Female - Low_Female;<br>Low_Female - Medium_Male;<br>Medium_Female - Low_Male;<br>Medium_Male - Low_Male;<br>Medium_Female - Medium_Male | A_32_P49668 | XM_003403393 | XM_003403393 |
| 490 | KIR2DL5A         | killer cell immunoglobulin-like receptor,<br>two domains, long cytoplasmic tail, 5A | 2.4844 | 0.043412 | 1.3624 | 0.44289 | High_Male - High_Female;<br>High_Female - Low_Female;<br>Low_Male - High_Female;<br>Medium_Female - High_Female;<br>Medium_Male - High_Female;<br>High_Male - Low_Female;<br>Low_Male - High_Male;<br>Medium_Female - High_Male;<br>Medium_Male - High_Male;<br>Low_Male - Low_Female;<br>Medium_Female - Low_Female;<br>Medium_Male - Low_Female;<br>Low_Male - Medium_Female;<br>Low_Male - Medium_Male;<br>Medium_Female - Medium_Male | A_24_P5890  | NM_020535    | NM_020535    |

|     |                  |                                       |        |          |        |         |                                                                                                                                                                                                                                                                                                                                                                                                                                           |               |              |              |
|-----|------------------|---------------------------------------|--------|----------|--------|---------|-------------------------------------------------------------------------------------------------------------------------------------------------------------------------------------------------------------------------------------------------------------------------------------------------------------------------------------------------------------------------------------------------------------------------------------------|---------------|--------------|--------------|
| 491 | SNORD90          | small nucleolar RNA, C/D box 90       | 2.4818 | 0.043596 | 1.3606 | 0.44387 | High_Male - High_Female;<br>Low_Female - High_Female;<br>Low_Male - High_Female;<br>Medium_Female - High_Female;<br>Medium_Male - High_Female;<br>Low_Female - High_Male;<br>Low_Male - High_Male;<br>Medium_Female - High_Male;<br>Medium_Male - High_Male;<br>Low_Male - Low_Female;<br>Medium_Female - Low_Female;<br>Medium_Male - Low_Female;<br>Low_Male - Medium_Female;<br>Low_Male - Medium_Male;<br>Medium_Male - Medium_Female | A_21_P0000387 | NR_003071    | NR_003071    |
| 492 | LOC10065324<br>5 | ig heavy chain V-III region VH26-like | 2.4731 | 0.04421  | 1.3545 | 0.4492  | High_Female - High_Male;<br>High_Female - Low_Female;<br>Low_Male - High_Female;<br>Medium_Female - High_Female;<br>Medium_Male - High_Female;<br>High_Male - Low_Female;<br>Low_Male - High_Male;<br>Medium_Female - High_Male;<br>Medium_Male - High_Male;<br>Low_Male - Low_Female;<br>Medium_Female - Low_Female;<br>Medium_Male - Low_Female;<br>Medium_Female - Low_Male;<br>Low_Male - Medium_Male;<br>Medium_Female - Medium_Male | A_24_P627503  | XM_003403831 | XM_003403831 |

|     |       |                                                  |        |          |        |         |                                                                                                                                                                                                                                                                                                                                                                                                                                           |               |           |           |
|-----|-------|--------------------------------------------------|--------|----------|--------|---------|-------------------------------------------------------------------------------------------------------------------------------------------------------------------------------------------------------------------------------------------------------------------------------------------------------------------------------------------------------------------------------------------------------------------------------------------|---------------|-----------|-----------|
| 493 | 5     | LOC10050719<br>uncharacterized LOC100507195      | 2.4713 | 0.044335 | 1.3533 | 0.44956 | High_Female - High_Male;<br>High_Female - Low_Female;<br>High_Female - Low_Male;<br>High_Female - Medium_Female;<br>High_Female - Medium_Male;<br>High_Male - Low_Female;<br>High_Male - Low_Male;<br>High_Male - Medium_Female;<br>Medium_Male - High_Male;<br>Low_Female - Low_Male;<br>Low_Female - Medium_Female;<br>Medium_Male - Low_Female;<br>Low_Male - Medium_Female;<br>Medium_Male - Low_Male;<br>Medium_Male - Medium_Female | A_21_P0014580 | XR_110374 | XR_110374 |
| 494 | C4BPA | complement component 4 binding protein,<br>alpha | 2.4678 | 0.044591 | 1.3508 | 0.45059 | High_Male - High_Female;<br>Low_Female - High_Female;<br>Low_Male - High_Female;<br>High_Female - Medium_Female;<br>High_Female - Medium_Male;<br>Low_Female - High_Male;<br>Low_Male - High_Male;<br>High_Male - Medium_Female;<br>High_Male - Medium_Male;<br>Low_Female - Low_Male;<br>Low_Female - Medium_Female;<br>Low_Female - Medium_Male;<br>Low_Male - Medium_Female;<br>Low_Male - Medium_Male;<br>Medium_Female - Medium_Male | A_23_P97541   | NM_000715 | NM_000715 |

|     |           |                                    |        |          |        |         |                                                                                                                                                                                                                                                                                                                                                                                                                                           |               |           |           |
|-----|-----------|------------------------------------|--------|----------|--------|---------|-------------------------------------------------------------------------------------------------------------------------------------------------------------------------------------------------------------------------------------------------------------------------------------------------------------------------------------------------------------------------------------------------------------------------------------------|---------------|-----------|-----------|
| 495 | LOC728975 | uncharacterized LOC728975          | 2.4674 | 0.044617 | 1.3505 | 0.45059 | High_Female - High_Male;<br>High_Female - Low_Female;<br>High_Female - Low_Male;<br>High_Female - Medium_Female;<br>High_Female - Medium_Male;<br>Low_Female - High_Male;<br>High_Male - Low_Male;<br>Medium_Female - High_Male;<br>High_Male - Medium_Male;<br>Low_Female - Low_Male;<br>Medium_Female - Low_Female;<br>Low_Female - Medium_Male;<br>Medium_Female - Low_Male;<br>Low_Male - Medium_Male;<br>Medium_Female - Medium_Male | A_33_P3337019 | XR_110914 | XR_110914 |
| 496 | TNNT1     | troponin T type 1 (skeletal, slow) | 2.4647 | 0.044807 | 1.3487 | 0.45064 | High_Male - High_Female;<br>High_Female - Low_Female;<br>High_Female - Low_Male;<br>Medium_Female - High_Female;<br>Medium_Male - High_Female;<br>High_Male - Low_Female;<br>High_Male - Low_Male;<br>High_Male - Medium_Female;<br>High_Male - Medium_Male;<br>Low_Male - Low_Female;<br>Medium_Female - Low_Female;<br>Medium_Male - Low_Female;<br>Medium_Female - Low_Male;<br>Medium_Male - Low_Male;<br>Medium_Male - Medium_Female | A_33_P3397865 | NM_003283 | NM_003283 |

|     |             |  |        |          |        |         |                                                                                                                                                                                                                                                                                                                                                                                                                                           |                                         |  |  |
|-----|-------------|--|--------|----------|--------|---------|-------------------------------------------------------------------------------------------------------------------------------------------------------------------------------------------------------------------------------------------------------------------------------------------------------------------------------------------------------------------------------------------------------------------------------------------|-----------------------------------------|--|--|
| 497 | XLOC_009567 |  | 2.4637 | 0.044882 | 1.3479 | 0.45064 | High_Male - High_Female;<br>Low_Female - High_Female;<br>Low_Male - High_Female;<br>Medium_Female - High_Female;<br>Medium_Male - High_Female;<br>Low_Female - High_Male;<br>Low_Male - High_Male;<br>High_Male - Medium_Female;<br>High_Male - Medium_Male;<br>Low_Male - Low_Female;<br>Low_Female - Medium_Female;<br>Low_Female - Medium_Male;<br>Low_Male - Medium_Female;<br>Low_Male - Medium_Male;<br>Medium_Female - Medium_Male | ens ENST00000457746 linc TCONS_00019176 |  |  |
| 498 | XLOC_013832 |  | 2.4626 | 0.044961 | 1.3472 | 0.45064 | High_Male - High_Female;<br>Low_Female - High_Female;<br>Low_Male - High_Female;<br>Medium_Female - High_Female;<br>Medium_Male - High_Female;<br>High_Male - Low_Female;<br>High_Male - Low_Male;<br>High_Male - Medium_Female;<br>High_Male - Medium_Male;<br>Low_Male - Low_Female;<br>Medium_Female - Low_Female;<br>Medium_Male - Low_Female;<br>Medium_Female - Low_Male;<br>Low_Male - Medium_Male;<br>Medium_Female - Medium_Male | linc TCONS_00028459                     |  |  |

|     |             |                              |        |          |        |         |                                                                                                                                                                                                                                                                                                                                                                                                                                           |                                                                                 |           |           |
|-----|-------------|------------------------------|--------|----------|--------|---------|-------------------------------------------------------------------------------------------------------------------------------------------------------------------------------------------------------------------------------------------------------------------------------------------------------------------------------------------------------------------------------------------------------------------------------------------|---------------------------------------------------------------------------------|-----------|-----------|
| 499 | XLOC_008752 |                              | 2.4611 | 0.045069 | 1.3461 | 0.45064 | High_Male - High_Female;<br>Low_Female - High_Female;<br>Low_Male - High_Female;<br>Medium_Female - High_Female;<br>Medium_Male - High_Female;<br>Low_Female - High_Male;<br>High_Male - Low_Male;<br>High_Male - Medium_Female;<br>High_Male - Medium_Male;<br>Low_Female - Low_Male;<br>Low_Female - Medium_Female;<br>Low_Female - Medium_Male;<br>Low_Male - Medium_Female;<br>Low_Male - Medium_Male;<br>Medium_Female - Medium_Male | ens ENST00000455612 ens ENST00000449071 linc TCONS_00017940 linc TCONS_00017941 |           |           |
| 500 | MIA         | melanoma inhibitory activity | 2.4611 | 0.045073 | 1.3461 | 0.45064 | High_Female - High_Male;<br>High_Female - Low_Female;<br>High_Female - Low_Male;<br>High_Female - Medium_Female;<br>Medium_Male - High_Female;<br>High_Male - Low_Female;<br>High_Male - Low_Male;<br>High_Male - Medium_Female;<br>Medium_Male - High_Male;<br>Low_Female - Low_Male;<br>Medium_Female - Low_Female;<br>Medium_Male - Low_Female;<br>Medium_Female - Low_Male;<br>Medium_Male - Low_Male;<br>Medium_Male - Medium_Female | A_23_P4714                                                                      | NM_006533 | NM_006533 |

|     |           |                            |        |          |        |         |                                                                                                                                                                                                                                                                                                                                                                                                                                           |               |           |           |
|-----|-----------|----------------------------|--------|----------|--------|---------|-------------------------------------------------------------------------------------------------------------------------------------------------------------------------------------------------------------------------------------------------------------------------------------------------------------------------------------------------------------------------------------------------------------------------------------------|---------------|-----------|-----------|
| 501 | LOC340335 | uncharacterized LOC340335  | 2.4557 | 0.045461 | 1.3424 | 0.45315 | High_Male - High_Female;<br>Low_Female - High_Female;<br>Low_Male - High_Female;<br>Medium_Female - High_Female;<br>Medium_Male - High_Female;<br>Low_Female - High_Male;<br>Low_Male - High_Male;<br>Medium_Female - High_Male;<br>Medium_Male - High_Male;<br>Low_Male - Low_Female;<br>Low_Female - Medium_Female;<br>Medium_Male - Low_Female;<br>Low_Male - Medium_Female;<br>Low_Male - Medium_Male;<br>Medium_Male - Medium_Female | A_33_P3812038 |           | AK074459  |
| 502 | GSPT1     | G1 to S phase transition 1 | 2.4551 | 0.045506 | 1.3419 | 0.45315 | High_Female - High_Male;<br>Low_Female - High_Female;<br>Low_Male - High_Female;<br>Medium_Female - High_Female;<br>Medium_Male - High_Female;<br>Low_Female - High_Male;<br>Low_Male - High_Male;<br>Medium_Female - High_Male;<br>Medium_Male - High_Male;<br>Low_Male - Low_Female;<br>Medium_Female - Low_Female;<br>Low_Female - Medium_Male;<br>Medium_Female - Low_Male;<br>Low_Male - Medium_Male;<br>Medium_Female - Medium_Male | A_24_P73669   | NM_002094 | NM_002094 |

|     |       |                                         |        |          |        |         |                                                                                                                                                                                                                                                                                                                                                                                                                                           |               |           |           |
|-----|-------|-----------------------------------------|--------|----------|--------|---------|-------------------------------------------------------------------------------------------------------------------------------------------------------------------------------------------------------------------------------------------------------------------------------------------------------------------------------------------------------------------------------------------------------------------------------------------|---------------|-----------|-----------|
| 503 | SORD  | sorbitol dehydrogenase                  | 2.4508 | 0.045824 | 1.3389 | 0.45505 | High_Male - High_Female;<br>Low_Female - High_Female;<br>Low_Male - High_Female;<br>Medium_Female - High_Female;<br>Medium_Male - High_Female;<br>High_Male - Low_Female;<br>High_Male - Low_Male;<br>High_Male - Medium_Female;<br>High_Male - Medium_Male;<br>Low_Male - Low_Female;<br>Medium_Female - Low_Female;<br>Medium_Male - Low_Female;<br>Medium_Female - Low_Male;<br>Medium_Male - Low_Male;<br>Medium_Male - Medium_Female | A_23_P77103   | NM_003104 | NM_003104 |
| 504 | F13A1 | coagulation factor XIII, A1 polypeptide | 2.4486 | 0.045985 | 1.3374 | 0.45505 | High_Female - High_Male;<br>Low_Female - High_Female;<br>High_Female - Low_Male;<br>Medium_Female - High_Female;<br>High_Female - Medium_Male;<br>Low_Female - High_Male;<br>High_Male - Low_Male;<br>Medium_Female - High_Male;<br>Medium_Male - High_Male;<br>Low_Female - Low_Male;<br>Medium_Female - Low_Female;<br>Low_Female - Medium_Male;<br>Medium_Female - Low_Male;<br>Medium_Male - Low_Male;<br>Medium_Female - Medium_Male | A_33_P3416097 | NM_000129 | NM_000129 |



|     |       |                                 |        |          |        |         |                                                                                                                                                                                                                                                                                                                                                                                                                                           |               |           |           |
|-----|-------|---------------------------------|--------|----------|--------|---------|-------------------------------------------------------------------------------------------------------------------------------------------------------------------------------------------------------------------------------------------------------------------------------------------------------------------------------------------------------------------------------------------------------------------------------------------|---------------|-----------|-----------|
| 505 | IERSL | immediate early response 5-like | 2.4482 | 0.046017 | 1.3371 | 0.45505 | High_Male - High_Female;<br>Low_Female - High_Female;<br>Low_Male - High_Female;<br>Medium_Female - High_Female;<br>Medium_Male - High_Female;<br>Low_Female - High_Male;<br>Low_Male - High_Male;<br>Medium_Female - High_Male;<br>High_Male - Medium_Male;<br>Low_Male - Low_Female;<br>Low_Female - Medium_Female;<br>Low_Female - Medium_Male;<br>Low_Male - Medium_Female;<br>Low_Male - Medium_Male;<br>Medium_Female - Medium_Male | A_33_P3302312 | NM_203434 | NM_203434 |
| 506 | GPR87 | G protein-coupled receptor 87   | 2.4476 | 0.046061 | 1.3367 | 0.45505 | High_Male - High_Female;<br>Low_Female - High_Female;<br>High_Female - Low_Male;<br>Medium_Female - High_Female;<br>High_Female - Medium_Male;<br>Low_Female - High_Male;<br>High_Male - Low_Male;<br>Medium_Female - High_Male;<br>High_Male - Medium_Male;<br>Low_Female - Low_Male;<br>Medium_Female - Low_Female;<br>Low_Female - Medium_Male;<br>Medium_Female - Low_Male;<br>Medium_Male - Low_Male;<br>Medium_Female - Medium_Male | A_23_P121120  | NM_023915 | NM_023915 |

|     |       |                                        |        |          |        |         |                                                                                                                                                                                                                                                                                                                                                                                                                                           |              |           |           |
|-----|-------|----------------------------------------|--------|----------|--------|---------|-------------------------------------------------------------------------------------------------------------------------------------------------------------------------------------------------------------------------------------------------------------------------------------------------------------------------------------------------------------------------------------------------------------------------------------------|--------------|-----------|-----------|
| 507 | SOAT2 | sterol O-acyltransferase 2             | 2.4415 | 0.046515 | 1.3324 | 0.45694 | High_Female - High_Male;<br>Low_Female - High_Female;<br>Low_Male - High_Female;<br>Medium_Female - High_Female;<br>High_Female - Medium_Male;<br>Low_Female - High_Male;<br>Low_Male - High_Male;<br>Medium_Female - High_Male;<br>High_Male - Medium_Male;<br>Low_Male - Low_Female;<br>Low_Female - Medium_Female;<br>Low_Female - Medium_Male;<br>Low_Male - Medium_Female;<br>Low_Male - Medium_Male;<br>Medium_Female - Medium_Male | A_23_P25475  | NM_003578 | NM_003578 |
| 508 | TRAK2 | trafficking protein, kinesin binding 2 | 2.4404 | 0.046599 | 1.3316 | 0.45694 | High_Female - High_Male;<br>High_Female - Low_Female;<br>High_Female - Low_Male;<br>Medium_Female - High_Female;<br>Medium_Male - High_Female;<br>Low_Female - High_Male;<br>High_Male - Low_Male;<br>Medium_Female - High_Male;<br>Medium_Male - High_Male;<br>Low_Female - Low_Male;<br>Medium_Female - Low_Female;<br>Medium_Male - Low_Female;<br>Medium_Female - Low_Male;<br>Medium_Male - Low_Male;<br>Medium_Female - Medium_Male | A_23_P209426 | NM_015049 | NM_015049 |

|     |         |                                                            |        |          |        |         |                                                                                                                                                                                                                                                                                                                                                                                                                                           |              |           |           |
|-----|---------|------------------------------------------------------------|--------|----------|--------|---------|-------------------------------------------------------------------------------------------------------------------------------------------------------------------------------------------------------------------------------------------------------------------------------------------------------------------------------------------------------------------------------------------------------------------------------------------|--------------|-----------|-----------|
| 509 | MOV10L1 | Mov10l1, Moloney leukemia virus 10-like 1, homolog (mouse) | 2.4402 | 0.046615 | 1.3315 | 0.45694 | High_Male - High_Female;<br>Low_Female - High_Female;<br>Low_Male - High_Female;<br>Medium_Female - High_Female;<br>Medium_Male - High_Female;<br>Low_Female - High_Male;<br>Low_Male - High_Male;<br>Medium_Female - High_Male;<br>High_Male - Medium_Male;<br>Low_Male - Low_Female;<br>Low_Female - Medium_Female;<br>Low_Female - Medium_Male;<br>Low_Male - Medium_Female;<br>Low_Male - Medium_Male;<br>Medium_Female - Medium_Male | A_23_P143774 | NM_018995 | NM_018995 |
| 510 | CEACAM8 | carcinoembryonic antigen-related cell adhesion molecule 8  | 2.4392 | 0.046692 | 1.3308 | 0.45694 | High_Female - High_Male;<br>High_Female - Low_Female;<br>High_Female - Low_Male;<br>Medium_Female - High_Female;<br>High_Female - Medium_Male;<br>High_Male - Low_Female;<br>High_Male - Low_Male;<br>Medium_Female - High_Male;<br>High_Male - Medium_Male;<br>Low_Male - Low_Female;<br>Medium_Female - Low_Female;<br>Medium_Male - Low_Female;<br>Medium_Female - Low_Male;<br>Medium_Male - Low_Male;<br>Medium_Female - Medium_Male | A_23_P380240 | NM_001816 | NM_001816 |

|     |                  |                              |        |          |        |         |                                                                                                                                                                                                                                                                                                                                                                                                                                           |              |           |           |
|-----|------------------|------------------------------|--------|----------|--------|---------|-------------------------------------------------------------------------------------------------------------------------------------------------------------------------------------------------------------------------------------------------------------------------------------------------------------------------------------------------------------------------------------------------------------------------------------------|--------------|-----------|-----------|
| 511 | LOC10019098<br>6 | uncharacterized LOC100190986 | 2.4389 | 0.046709 | 1.3306 | 0.45694 | High_Female - High_Male;<br>Low_Female - High_Female;<br>Low_Male - High_Female;<br>High_Female - Medium_Female;<br>Medium_Male - High_Female;<br>Low_Female - High_Male;<br>Low_Male - High_Male;<br>High_Male - Medium_Female;<br>Medium_Male - High_Male;<br>Low_Male - Low_Female;<br>Low_Female - Medium_Female;<br>Medium_Male - Low_Female;<br>Low_Male - Medium_Female;<br>Medium_Male - Low_Male;<br>Medium_Male - Medium_Female | A_24_P693321 | NR_024456 | NR_024456 |
| 512 | CLPS             | colipase, pancreatic         | 2.4333 | 0.047135 | 1.3267 | 0.46021 | High_Male - High_Female;<br>Low_Female - High_Female;<br>Low_Male - High_Female;<br>Medium_Female - High_Female;<br>High_Female - Medium_Male;<br>Low_Female - High_Male;<br>Low_Male - High_Male;<br>Medium_Female - High_Male;<br>High_Male - Medium_Male;<br>Low_Male - Low_Female;<br>Medium_Female - Low_Female;<br>Low_Female - Medium_Male;<br>Low_Male - Medium_Female;<br>Low_Male - Medium_Male;<br>Medium_Female - Medium_Male | A_23_P8142   | NM_001832 | NM_001832 |

|     |       |                       |        |          |        |         |                                                                                                                                                                                                                                                                                                                                                                                                                                           |               |           |           |
|-----|-------|-----------------------|--------|----------|--------|---------|-------------------------------------------------------------------------------------------------------------------------------------------------------------------------------------------------------------------------------------------------------------------------------------------------------------------------------------------------------------------------------------------------------------------------------------------|---------------|-----------|-----------|
| 513 |       |                       | 2.4295 | 0.047421 | 1.324  | 0.4621  | High_Female - High_Male;<br>High_Female - Low_Female;<br>High_Female - Low_Male;<br>High_Female - Medium_Female;<br>High_Female - Medium_Male;<br>High_Male - Low_Female;<br>Low_Male - High_Male;<br>Medium_Female - High_Male;<br>High_Male - Medium_Male;<br>Low_Male - Low_Female;<br>Medium_Female - Low_Female;<br>Low_Female - Medium_Male;<br>Medium_Female - Low_Male;<br>Low_Male - Medium_Male;<br>Medium_Female - Medium_Male | A_33_P3233819 |           |           |
| 514 | CNKS3 | CNKS3 family member 3 | 2.4277 | 0.04756  | 1.3228 | 0.46255 | High_Male - High_Female;<br>Low_Female - High_Female;<br>High_Female - Low_Male;<br>Medium_Female - High_Female;<br>Medium_Male - High_Female;<br>High_Male - Low_Female;<br>High_Male - Low_Male;<br>High_Male - Medium_Female;<br>Medium_Male - High_Male;<br>Low_Female - Low_Male;<br>Low_Female - Medium_Female;<br>Medium_Male - Low_Female;<br>Medium_Female - Low_Male;<br>Medium_Male - Low_Male;<br>Medium_Male - Medium_Female | A_23_P134085  | NM_173515 | NM_173515 |

|     |        |                         |        |          |        |         |                                                                                                                                                                                                                                                                                                                                                                                                                                           |               |           |           |
|-----|--------|-------------------------|--------|----------|--------|---------|-------------------------------------------------------------------------------------------------------------------------------------------------------------------------------------------------------------------------------------------------------------------------------------------------------------------------------------------------------------------------------------------------------------------------------------------|---------------|-----------|-----------|
| 515 | HBZ    | hemoglobin, zeta        | 2.4264 | 0.047661 | 1.3218 | 0.46263 | High_Female - High_Male;<br>High_Female - Low_Female;<br>High_Female - Low_Male;<br>High_Female - Medium_Female;<br>High_Female - Medium_Male;<br>High_Male - Low_Female;<br>Low_Male - High_Male;<br>High_Male - Medium_Female;<br>High_Male - Medium_Male;<br>Low_Male - Low_Female;<br>Medium_Female - Low_Female;<br>Low_Female - Medium_Male;<br>Low_Male - Medium_Female;<br>Low_Male - Medium_Male;<br>Medium_Female - Medium_Male | A_21_P0011413 | NM_005332 | NM_005332 |
| 516 | ZNF488 | zinc finger protein 488 | 2.4246 | 0.047801 | 1.3206 | 0.4631  | High_Male - High_Female;<br>Low_Female - High_Female;<br>Low_Male - High_Female;<br>Medium_Female - High_Female;<br>High_Female - Medium_Male;<br>Low_Female - High_Male;<br>Low_Male - High_Male;<br>Medium_Female - High_Male;<br>High_Male - Medium_Male;<br>Low_Female - Low_Male;<br>Low_Female - Medium_Female;<br>Low_Female - Medium_Male;<br>Low_Male - Medium_Female;<br>Low_Male - Medium_Male;<br>Medium_Female - Medium_Male | A_23_P23966   | NM_153034 | NM_153034 |

|     |             |                                           |        |          |        |         |                                                                                                                                                                                                                                                                                                                                                                                                                                           |                |           |           |
|-----|-------------|-------------------------------------------|--------|----------|--------|---------|-------------------------------------------------------------------------------------------------------------------------------------------------------------------------------------------------------------------------------------------------------------------------------------------------------------------------------------------------------------------------------------------------------------------------------------------|----------------|-----------|-----------|
| 517 | LSR         | lipolysis stimulated lipoprotein receptor | 2.4202 | 0.048135 | 1.3175 | 0.46543 | High_Female - High_Male;<br>High_Female - Low_Female;<br>Low_Male - High_Female;<br>High_Female - Medium_Female;<br>High_Female - Medium_Male;<br>High_Male - Low_Female;<br>Low_Male - High_Male;<br>Medium_Female - High_Male;<br>High_Male - Medium_Male;<br>Low_Male - Low_Female;<br>Medium_Female - Low_Female;<br>Low_Female - Medium_Male;<br>Low_Male - Medium_Female;<br>Low_Male - Medium_Male;<br>Medium_Female - Medium_Male | A_23_P142389   | NM_205834 | NM_205834 |
| 518 | XLOC_005127 |                                           | 2.4125 | 0.048736 | 1.3122 | 0.46955 | High_Male - High_Female;<br>Low_Female - High_Female;<br>High_Female - Low_Male;<br>Medium_Female - High_Female;<br>High_Female - Medium_Male;<br>Low_Female - High_Male;<br>High_Male - Low_Male;<br>Medium_Female - High_Male;<br>High_Male - Medium_Male;<br>Low_Female - Low_Male;<br>Low_Female - Medium_Female;<br>Low_Female - Medium_Male;<br>Medium_Female - Low_Male;<br>Medium_Male - Low_Male;<br>Medium_Female - Medium_Male | A_19_P00316820 |           | AK091028  |

|     |             |                             |        |          |        |         |                                                                                                                                                                                                                                                                                                                                                                                                                                           |                     |           |           |
|-----|-------------|-----------------------------|--------|----------|--------|---------|-------------------------------------------------------------------------------------------------------------------------------------------------------------------------------------------------------------------------------------------------------------------------------------------------------------------------------------------------------------------------------------------------------------------------------------------|---------------------|-----------|-----------|
| 519 | XLOC_010065 |                             | 2.4124 | 0.048749 | 1.312  | 0.46955 | High_Male - High_Female;<br>Low_Female - High_Female;<br>Low_Male - High_Female;<br>Medium_Female - High_Female;<br>Medium_Male - High_Female;<br>Low_Female - High_Male;<br>Low_Male - High_Male;<br>High_Male - Medium_Female;<br>High_Male - Medium_Male;<br>Low_Female - Low_Male;<br>Low_Female - Medium_Female;<br>Low_Female - Medium_Male;<br>Low_Male - Medium_Female;<br>Low_Male - Medium_Male;<br>Medium_Female - Medium_Male | linc TCONS_00020777 |           |           |
| 520 | ORMDL3      | ORM1-like 3 (S. cerevisiae) | 2.4093 | 0.048991 | 1.3099 | 0.47021 | High_Male - High_Female;<br>Low_Female - High_Female;<br>Low_Male - High_Female;<br>Medium_Female - High_Female;<br>Medium_Male - High_Female;<br>Low_Female - High_Male;<br>Low_Male - High_Male;<br>High_Male - Medium_Female;<br>High_Male - Medium_Male;<br>Low_Male - Low_Female;<br>Low_Female - Medium_Female;<br>Low_Female - Medium_Male;<br>Low_Male - Medium_Female;<br>Low_Male - Medium_Male;<br>Medium_Female - Medium_Male | A_23_P129829        | NM_139280 | NM_139280 |



|     |   |                                             |        |          |        |         |                                                                                                                                                                                                                                                                                                                                                                                                                                           |               |           |           |
|-----|---|---------------------------------------------|--------|----------|--------|---------|-------------------------------------------------------------------------------------------------------------------------------------------------------------------------------------------------------------------------------------------------------------------------------------------------------------------------------------------------------------------------------------------------------------------------------------------|---------------|-----------|-----------|
| 521 | 7 | LOC10012938<br>uncharacterized LOC100129387 | 2.4091 | 0.049008 | 1.3097 | 0.47021 | High_Female - High_Male;<br>Low_Female - High_Female;<br>Low_Male - High_Female;<br>Medium_Female - High_Female;<br>Medium_Male - High_Female;<br>Low_Female - High_Male;<br>Low_Male - High_Male;<br>Medium_Female - High_Male;<br>Medium_Male - High_Male;<br>Low_Male - Low_Female;<br>Medium_Female - Low_Female;<br>Medium_Male - Low_Female;<br>Low_Male - Medium_Female;<br>Medium_Male - Low_Male;<br>Medium_Male - Medium_Female | A_33_P3333777 | NR_024490 | NR_024490 |
| 522 | 4 | LOC10050590<br>uncharacterized LOC100505904 | 2.4079 | 0.049099 | 1.3089 | 0.47021 | High_Female - High_Male;<br>High_Female - Low_Female;<br>High_Female - Low_Male;<br>High_Female - Medium_Female;<br>High_Female - Medium_Male;<br>Low_Female - High_Male;<br>High_Male - Low_Male;<br>High_Male - Medium_Female;<br>High_Male - Medium_Male;<br>Low_Female - Low_Male;<br>Low_Female - Medium_Female;<br>Low_Female - Medium_Male;<br>Low_Male - Medium_Female;<br>Medium_Male - Low_Male;<br>Medium_Male - Medium_Female | A_21_P0005210 | XR_110640 | XR_110640 |

|     |  |  |        |          |        |         |                                                                                                                                                                                                                                                                                                                                                                                                                                           |               |  |  |
|-----|--|--|--------|----------|--------|---------|-------------------------------------------------------------------------------------------------------------------------------------------------------------------------------------------------------------------------------------------------------------------------------------------------------------------------------------------------------------------------------------------------------------------------------------------|---------------|--|--|
| 523 |  |  | 2.4064 | 0.049216 | 1.3079 | 0.47042 | High_Male - High_Female;<br>Low_Female - High_Female;<br>Low_Male - High_Female;<br>Medium_Female - High_Female;<br>Medium_Male - High_Female;<br>Low_Female - High_Male;<br>Low_Male - High_Male;<br>High_Male - Medium_Female;<br>High_Male - Medium_Male;<br>Low_Male - Low_Female;<br>Low_Female - Medium_Female;<br>Low_Female - Medium_Male;<br>Low_Male - Medium_Female;<br>Low_Male - Medium_Male;<br>Medium_Female - Medium_Male | A_33_P3240340 |  |  |
| 524 |  |  | 2.404  | 0.049411 | 1.3062 | 0.47119 | High_Male - High_Female;<br>Low_Female - High_Female;<br>Low_Male - High_Female;<br>Medium_Female - High_Female;<br>Medium_Male - High_Female;<br>Low_Female - High_Male;<br>Low_Male - High_Male;<br>High_Male - Medium_Female;<br>High_Male - Medium_Male;<br>Low_Male - Low_Female;<br>Low_Female - Medium_Female;<br>Low_Female - Medium_Male;<br>Low_Male - Medium_Female;<br>Low_Male - Medium_Male;<br>Medium_Female - Medium_Male | A_33_P3271885 |  |  |

|     |                    |                                      |        |          |        |         |                                                                                                                                                                                                                                                                                                                                                                                                                                           |               |           |           |
|-----|--------------------|--------------------------------------|--------|----------|--------|---------|-------------------------------------------------------------------------------------------------------------------------------------------------------------------------------------------------------------------------------------------------------------------------------------------------------------------------------------------------------------------------------------------------------------------------------------------|---------------|-----------|-----------|
| 525 | MIR22HG            | MIR22 host gene (non-protein coding) | 2.3995 | 0.049767 | 1.3031 | 0.47119 | High_Male - High_Female;<br>Low_Female - High_Female;<br>Low_Male - High_Female;<br>Medium_Female - High_Female;<br>Medium_Male - High_Female;<br>Low_Female - High_Male;<br>Low_Male - High_Male;<br>Medium_Female - High_Male;<br>High_Male - Medium_Male;<br>Low_Male - Low_Female;<br>Low_Female - Medium_Female;<br>Low_Female - Medium_Male;<br>Low_Male - Medium_Female;<br>Low_Male - Medium_Male;<br>Medium_Female - Medium_Male | A_24_P253723  | NR_028502 | NR_028502 |
| 526 | XLOC_I2_0019<br>53 |                                      | 2.3992 | 0.049791 | 1.3028 | 0.47119 | High_Female - High_Male;<br>Low_Female - High_Female;<br>Low_Male - High_Female;<br>High_Female - Medium_Female;<br>Medium_Male - High_Female;<br>Low_Female - High_Male;<br>Low_Male - High_Male;<br>High_Male - Medium_Female;<br>Medium_Male - High_Male;<br>Low_Female - Low_Male;<br>Low_Female - Medium_Female;<br>Medium_Male - Low_Female;<br>Low_Male - Medium_Female;<br>Medium_Male - Low_Male;<br>Medium_Male - Medium_Female | A_21_P0010944 |           | AL832069  |

|     |                  |                                     |        |          |        |         |                                                                                                                                                                                                                                                                                                                                                                                                                                           |               |           |           |
|-----|------------------|-------------------------------------|--------|----------|--------|---------|-------------------------------------------------------------------------------------------------------------------------------------------------------------------------------------------------------------------------------------------------------------------------------------------------------------------------------------------------------------------------------------------------------------------------------------------|---------------|-----------|-----------|
| 527 | LOC10050719<br>5 | uncharacterized LOC100507195        | 2.3989 | 0.049814 | 1.3027 | 0.47119 | High_Female - High_Male;<br>High_Female - Low_Female;<br>High_Female - Low_Male;<br>High_Female - Medium_Female;<br>High_Female - Medium_Male;<br>High_Male - Low_Female;<br>High_Male - Low_Male;<br>High_Male - Medium_Female;<br>Medium_Male - High_Male;<br>Low_Male - Low_Female;<br>Medium_Female - Low_Female;<br>Medium_Male - Low_Female;<br>Medium_Female - Low_Male;<br>Medium_Male - Low_Male;<br>Medium_Male - Medium_Female | A_21_P0007880 | XR_110374 | XR_110374 |
| 528 | RGS12            | regulator of G-protein signaling 12 | 2.3984 | 0.049856 | 1.3023 | 0.47119 | High_Male - High_Female;<br>Low_Female - High_Female;<br>Low_Male - High_Female;<br>Medium_Female - High_Female;<br>Medium_Male - High_Female;<br>Low_Female - High_Male;<br>Low_Male - High_Male;<br>High_Male - Medium_Female;<br>High_Male - Medium_Male;<br>Low_Male - Low_Female;<br>Low_Female - Medium_Female;<br>Low_Female - Medium_Male;<br>Low_Male - Medium_Female;<br>Low_Male - Medium_Male;<br>Medium_Female - Medium_Male | A_23_P69513   | NM_198229 | NM_198229 |

|     |     |          |       |          |        |         |                                                                                                                                                                                                                                                                                                                                                                                                                                           |              |           |           |
|-----|-----|----------|-------|----------|--------|---------|-------------------------------------------------------------------------------------------------------------------------------------------------------------------------------------------------------------------------------------------------------------------------------------------------------------------------------------------------------------------------------------------------------------------------------------------|--------------|-----------|-----------|
| 529 | CAT | catalase | 2.397 | 0.049972 | 1.3013 | 0.47119 | High_Male - High_Female;<br>Low_Female - High_Female;<br>Low_Male - High_Female;<br>Medium_Female - High_Female;<br>Medium_Male - High_Female;<br>High_Male - Low_Female;<br>High_Male - Low_Male;<br>High_Male - Medium_Female;<br>Medium_Male - High_Male;<br>Low_Male - Low_Female;<br>Medium_Female - Low_Female;<br>Medium_Male - Low_Female;<br>Medium_Female - Low_Male;<br>Medium_Male - Low_Male;<br>Medium_Male - Medium_Female | A_23_P105138 | NM_001752 | NM_001752 |
|-----|-----|----------|-------|----------|--------|---------|-------------------------------------------------------------------------------------------------------------------------------------------------------------------------------------------------------------------------------------------------------------------------------------------------------------------------------------------------------------------------------------------------------------------------------------------|--------------|-----------|-----------|

|                  |     |
|------------------|-----|
| Total in Data 1  | 476 |
| Total in Data 2  | 529 |
| Unique in Data 1 | 476 |
| Unique in Data 2 | 439 |
| Common in both   | 7   |
