# Supplementary material for: Association between Arsenic Level, Gene Expression in Asian Population, and In Vitro Carcinogenic Bladder Tumor
Source: Hindawi journal article supplement (doi:10.1155/2022/3459855), 2022-01-01
Supplement: f4 [file 3459855.f4.pdf]

**Table S3. Significant pathways in Data-1 and Data-2 (male, and female genders) and the overlap between two (highlighted in pink).**

| Data1 |                                                                 |               |          |                                                                                                    |
|-------|-----------------------------------------------------------------|---------------|----------|----------------------------------------------------------------------------------------------------|
| S.No. | Ingenuity Canonical Pathways                                    | -log(p-value) | Ratio    | Molecules                                                                                          |
| 1     | CD28 Signaling in T Helper Cells                                | 5.41E+00      | 1.00E-01 | ACTR3,CARD11,CD28,CDC42,FCER1G,HLA-DMA,HLA-DMB,ITK,PAK1,PIK3R1,PLCG1,TRGV9                         |
| 2     | Macropinocytosis Signaling                                      | 4.79E+00      | 1.18E-01 | CDC42,ITGB3,ITGB6,PAK1,PIK3R1,PLCG1,PRKD1,RRAS2,USP6NL                                             |
| 3     | IL-8 Signaling                                                  | 4.41E+00      | 7.00E-02 | BCL2,BRAF,CDC42,CXCR2,GNG5,IRAK3,ITGB3,NCF2,PIK3R1,PLD3,PRKD1,RHOQ,RRAS2,VEGFA                     |
| 4     | Virus Entry via Endocytic Pathways                              | 4.35E+00      | 9.35E-02 | ACTA2,CDC42,FLNB,ITGB3,ITGB6,ITSN1,PIK3R1,PLCG1,PRKD1,RRAS2                                        |
| 5     | Role of NFAT in Regulation of the Immune Response               | 4.25E+00      | 7.18E-02 | CD28,FCER1A,FCER1G,FCGR2B,GNG5,HLA-DMA,HLA-DMB,ITK,PIK3R1,PLCB1,PLCG1,RRAS2,TRGV9                  |
| 6     | Fcy Receptor-mediated Phagocytosis in Macrophages and Monocytes | 4.05E+00      | 9.57E-02 | ACTA2,ACTR3,CBL,CDC42,PAK1,PIK3R1,PLCG1,PLD3,PRKD1                                                 |
| 7     | Tec Kinase Signaling                                            | 4.05E+00      | 7.32E-02 | ACTA2,CDC42,FCER1A,FCER1G,GNG5,ITK,PAK1,PIK3R1,PLCG1,PRKD1,RHOQ,TRGV9                              |
| 8     | Protein Ubiquitination Pathway                                  | 3.51E+00      | 5.49E-02 | CBL,DNAJC22,DNAJC8,HSPA2,IFNG,PSMC1,PSMD2,PSMD7,SKP1,UBE2A,UBE2D1,UBE2E2,UBE2R2,UBE3A,USP18        |
| 9     | iCOS-iCOSL Signaling in T Helper Cells                          | 3.50E+00      | 8.11E-02 | CD28,FCER1G,HLA-DMA,HLA-DMB,ICOS,ITK,PIK3R1,PLCG1,TRGV9                                            |
| 10    | Graft-versus-Host Disease Signaling                             | 3.50E+00      | 1.25E-01 | CD28,FCER1G,HLA-DMA,HLA-DMB,IFNG,TRGV9                                                             |
| 11    | Th2 Pathway                                                     | 3.48E+00      | 7.35E-02 | BHLHE41,CD28,GFI1,HLA-DMA,HLA-DMB,ICOS,IFNG,PIK3R1,PSEN1,PTGDR2                                    |
| 12    | Acute Myeloid Leukemia Signaling                                | 3.47E+00      | 8.99E-02 | BRAF,IDH1,JUP,MYC,PIK3R1,PIM1,PIM2,RRAS2                                                           |
| 13    | Th1 and Th2 Activation Pathway                                  | 3.28E+00      | 6.43E-02 | BHLHE41,CD28,GFI1,HLA-DMA,HLA-DMB,ICOS,IFNG,mir-29,PIK3R1,PSEN1,PTGDR2                             |
| 14    | Phospholipase C Signaling                                       | 3.27E+00      | 5.45E-02 | ARHGEF18,CDC42,FCER1G,FCGR2B,GNG5,ITK,PLA2G4A,PLCB1,PLCG1,PLD3,PRKD1,RHOQ,RRAS2,TRGV9              |
| 15    | T Helper Cell Differentiation                                   | 3.27E+00      | 9.59E-02 | CD28,FCER1G,HLA-DMA,HLA-DMB,ICOS,IFNG,TRGV9                                                        |
| 16    | T Cell Exhaustion Signaling Pathway                             | 3.19E+00      | 6.29E-02 | BTLA,CD28,FCER1G,HLA-DMA,HLA-DMB,IFNG,PIK3R1,PLCG1,RRAS2,TRGV9,VEGFA                               |
| 17    | VEGF Signaling                                                  | 3.16E+00      | 8.08E-02 | ACTA2,BCL2,EIF1AX,EIF2S1,PIK3R1,PLCG1,RRAS2,VEGFA                                                  |
| 18    | Phagosome Formation                                             | 3.12E+00      | 7.20E-02 | CDC42,FCER1A,FCER1G,FCGR2B,PIK3R1,PLCB1,PLCG1,PRKD1,RHOQ                                           |
| 19    | Prostanoid Biosynthesis                                         | 3.10E+00      | 3.00E-01 | CYP2S1,PTGDS,TBXAS1                                                                                |
| 20    | NER Pathway                                                     | 3.05E+00      | 7.77E-02 | GTF2H1,H4C13,H4C9,HMG1,PCNA,POLD2,POLR2E,RFC4                                                      |
| 21    | PKCθ Signaling in T Lymphocytes                                 | 3.04E+00      | 6.45E-02 | CACNA1C,CARD11,CD28,FCER1G,HLA-DMA,HLA-DMB,PIK3R1,PLCG1,RRAS2,TRGV9                                |
| 22    | Hepatic Fibrosis Signaling Pathway                              | 3.03E+00      | 4.62E-02 | ACTA2,BCL2,BRAF,CACNA1C,CDC42,IL1R1,IRAK3,ITGB3,MYC,NCF2,PIK3R1,PLCG1,PRKD1,RHOQ,RRAS2,TIMP1,VEGFA |
| 23    | Dendritic Cell Maturation                                       | 3.03E+00      | 6.01E-02 | CD1C,CD1D,FCER1G,FCGR2B,HLA-DMA,HLA-DMB,IRF8,PIK3R1,PLCB1,PLCG1,TRGV9                              |
| 24    | T Cell Receptor Signaling                                       | 2.99E+00      | 7.62E-02 | CARD11,CBL,CD28,ITK,PIK3R1,PLCG1,RASA1,RRAS2                                                       |
| 25    | HER-2 Signaling in Breast Cancer                                | 2.91E+00      | 8.33E-02 | CDC42,ITGB3,ITGB6,PIK3R1,PLCG1,PRKD1,RRAS2                                                         |

|                  |     |
|------------------|-----|
| Total in Data 1  | 145 |
| Total in Data 2  | 36  |
| Common in both   | 6   |
| Unique in Data 1 | 139 |
| Unique in Data 2 | 30  |

|    |                                                             |          |          |                                                                                                  |
|----|-------------------------------------------------------------|----------|----------|--------------------------------------------------------------------------------------------------|
| 26 | Type I Diabetes Mellitus Signaling                          | 2.84E+00 | 7.21E-02 | BCL2,CD28,FCER1G,HLA-DMA,HLA-DMB,IFNG,IL1R1,TRGV9                                                |
| 27 | Lipid Antigen Presentation by CD1                           | 2.83E+00 | 1.54E-01 | CD1C,CD1D,FCER1G,TRGV9                                                                           |
| 28 | Phospholipases                                              | 2.83E+00 | 9.38E-02 | PLA2G15,PLA2G4A,PLA2G7,PLCB1,PLCG1,PLD3                                                          |
| 29 | EIF2 Signaling                                              | 2.82E+00 | 5.36E-02 | ACTA2,BCL2,EIF1AX,EIF2AK3,EIF2AK4,EIF2S1,MYC,PIK3R1,RPS4X,RPSA,RRAS2,VEGFA                       |
| 30 | Calcium-induced T Lymphocyte Apoptosis                      | 2.76E+00 | 9.09E-02 | FCER1G,HLA-DMA,HLA-DMB,PLCG1,PRKD1,TRGV9                                                         |
| 31 | Pyridoxal 5'-phosphate Salvage Pathway                      | 2.76E+00 | 9.09E-02 | BRAF,CDK1,PAK1,PIM1,PLK1,PRKX                                                                    |
| 32 | Molecular Mechanisms of Cancer                              | 2.75E+00 | 4.35E-02 | ARHGEF18,BCL2,BRAF,CBL,CDC42,CDK1,MYC,PAK1,PIK3R1,PLCB1,PRKD1,PSEN1,RASA1,RHOQ,RRAS2,SMAD5,SMAD9 |
| 33 | Altered T Cell and B Cell Signaling in Rheumatoid Arthritis | 2.73E+00 | 7.78E-02 | CD28,FCER1G,HLA-DMA,HLA-DMB,IFNG,TNFSF13,TRGV9                                                   |
| 34 | fMLP Signaling in Neutrophils                               | 2.71E+00 | 6.90E-02 | ACTR3,CDC42,GNG5,NCF2,PIK3R1,PLCB1,PRKD1,RRAS2                                                   |
| 35 | Role of Tissue Factor in Cancer                             | 2.69E+00 | 6.84E-02 | CDC42,ITGB3,P4HB,PAK1,PIK3R1,PLCB1,RRAS2,VEGFA                                                   |
| 36 | Nur77 Signaling in T Lymphocytes                            | 2.69E+00 | 8.82E-02 | BCL2,CD28,FCER1G,PCNA,PRKD1,TRGV9                                                                |
| 37 | Th1 Pathway                                                 | 2.60E+00 | 6.61E-02 | CD28,HLA-DMA,HLA-DMB,ICOS,IFNG,mir-29,PIK3R1,PSEN1                                               |
| 38 | Autoimmune Thyroid Disease Signaling                        | 2.60E+00 | 1.02E-01 | CD28,FCER1G,HLA-DMA,HLA-DMB,TRGV9                                                                |
| 39 | Amyotrophic Lateral Sclerosis Signaling                     | 2.55E+00 | 7.22E-02 | BCL2,CACNA1C,GPX1,GRIA4,PAK1,PIK3R1,VEGFA                                                        |
| 40 | Salvage Pathways of Pyrimidine Ribonucleotides              | 2.52E+00 | 7.14E-02 | BRAF,CDK1,CMPK2,PAK1,PIM1,PLK1,PRKX                                                              |
| 41 | Integrin Signaling                                          | 2.51E+00 | 5.16E-02 | ACTA2,ACTR3,BRAF,CDC42,ITGB3,ITGB6,PAK1,PIK3R1,PLCG1,RHOQ,RRAS2                                  |
| 42 | Glioma Invasiveness Signaling                               | 2.50E+00 | 8.11E-02 | CDC42,ITGB3,PIK3R1,RHOQ,RRAS2,TIMP1                                                              |
| 43 | Hypoxia Signaling in the Cardiovascular System              | 2.50E+00 | 8.11E-02 | P4HB,UBE2A,UBE2D1,UBE2E2,UBE2R2,VEGFA                                                            |
| 44 | Mismatch Repair in Eukaryotes                               | 2.47E+00 | 1.88E-01 | FEN1,PCNA,RFC4                                                                                   |
| 45 | P2Y Purigenic Receptor Signaling Pathway                    | 2.47E+00 | 6.30E-02 | GNG5,ITGB3,MYC,PIK3R1,PLCB1,PLCG1,PRKD1,RRAS2                                                    |
| 46 | dTMP De Novo Biosynthesis                                   | 2.44E+00 | 4.00E-01 | DHFR2,TYMS                                                                                       |
| 47 | Endothelin-1 Signaling                                      | 2.42E+00 | 5.32E-02 | BRAF,MYC,PIK3R1,PLA2G4A,PLA2G7,PLCB1,PLCG1,PLD3,PRKD1,RRAS2                                      |
| 48 | ILK Signaling                                               | 2.39E+00 | 5.26E-02 | ACTA2,CDC42,FLNB,ITGB3,ITGB6,MYC,PIK3R1,RHOQ,TMSB4Y,VEGFA                                        |
| 49 | Role of BRCA1 in DNA Damage Response                        | 2.34E+00 | 7.50E-02 | HLTF,IFNG,PLK1,RBBP8,RFC4,SMARCB1                                                                |
| 50 | RAR Activation                                              | 2.32E+00 | 5.15E-02 | GTF2H1,HLTF,PIK3R1,PNPLA4,PRKD1,RDH13,SMAD5,SMAD9,SMARCB1,VEGFA                                  |
| 51 | STAT3 Pathway                                               | 2.31E+00 | 5.93E-02 | BCL2,CXCR2,IL13RA1,IL1R1,MYC,PIM1,RRAS2,VEGFA                                                    |
| 52 | Prolactin Signaling                                         | 2.31E+00 | 7.41E-02 | MYC,PIK3R1,PLCG1,PRKD1,PRLR,RRAS2                                                                |
| 53 | Paxillin Signaling                                          | 2.29E+00 | 6.48E-02 | ACTA2,CDC42,ITGB3,ITGB6,PAK1,PIK3R1,RRAS2                                                        |
| 54 | Leukocyte Extravasation Signaling                           | 2.28E+00 | 5.08E-02 | ACTA2,CDC42,ITGB3,ITK,NCF2,PIK3R1,PLCG1,PRKD1,RDX,TIMP1                                          |
| 55 | MSP-ROn Signaling Pathway                                   | 2.28E+00 | 8.62E-02 | ACTA2,IFNG,KLK2,MST1R,PIK3R1                                                                     |
| 56 | Systemic Lupus Erythematosus Signaling                      | 2.27E+00 | 4.80E-02 | CBL,CD28,FCER1G,FCGR2B,PIK3R1,PIM2,PLCG1,PRPF4,RRAS2,SF3B4,TRGV9                                 |
| 57 | Cdc42 Signaling                                             | 2.26E+00 | 5.39E-02 | ACTR3,CDC42,FCER1G,HLA-DMA,HLA-DMB,ITK,PAK1,RASA1,TRGV9                                          |
| 58 | VEGF Family Ligand-Receptor Interactions                    | 2.23E+00 | 7.14E-02 | PIK3R1,PLA2G4A,PLCG1,PRKD1,RRAS2,VEGFA                                                           |
| 59 | HGF Signaling                                               | 2.23E+00 | 6.31E-02 | CDC42,ETS2,PAK1,PIK3R1,PLCG1,PRKD1,RRAS2                                                         |
| 60 | Allograft Rejection Signaling                               | 2.18E+00 | 6.98E-02 | CD28,FCER1G,HLA-DMA,HLA-DMB,IFNG,TRGV9                                                           |
| 61 | Antiproliferative Role of TOB in T Cell Signaling           | 2.17E+00 | 1.03E-01 | CD28,FCER1G,SKP1,TRGV9                                                                           |
| 62 | Thrombopoietin Signaling                                    | 2.12E+00 | 7.94E-02 | MYC,PIK3R1,PLCG1,PRKD1,RRAS2                                                                     |

|     |                                                          |          |          |                                                                                                        |
|-----|----------------------------------------------------------|----------|----------|--------------------------------------------------------------------------------------------------------|
| 63  | Fc Epsilon RI Signaling                                  | 2.10E+00 | 5.98E-02 | FCER1A,FCER1G,PIK3R1,PLA2G4A,PLCG1,PRKD1,RRAS2                                                         |
| 64  | Signaling by Rho Family GTPases                          | 2.08E+00 | 4.51E-02 | ACTA2,ACTR3,ARHGEF18,CDC42,GNG5,NCF2,PAK1,PIK3R1,RDX,RHOQ,SEPTIN6                                      |
| 65  | Mitotic Roles of Polo-Like Kinase                        | 2.04E+00 | 7.58E-02 | CDK1,FBXO5,KIF11,PLK1,SMC1A                                                                            |
| 66  | BAG2 Signaling Pathway                                   | 2.02E+00 | 9.30E-02 | BAG2,HSPA2,MYC,UBE2D1                                                                                  |
| 67  | ErbB4 Signaling                                          | 2.01E+00 | 7.46E-02 | PIK3R1,PLCG1,PRKD1,PSEN1,RRAS2                                                                         |
| 68  | G Beta Gamma Signaling                                   | 2.01E+00 | 5.74E-02 | CACNA1C,CDC42,GNG5,PAK1,PLCG1,PRKD1,RRAS2                                                              |
| 69  | CCR5 Signaling in Macrophages                            | 2.00E+00 | 6.38E-02 | CACNA1C,FCER1G,GNG5,PLCG1,PRKD1,TRGV9                                                                  |
| 70  | ErbB Signaling                                           | 2.00E+00 | 6.38E-02 | CDC42,PAK1,PIK3R1,PLCG1,PRKD1,RRAS2                                                                    |
| 71  | CCR3 Signaling in Eosinophils                            | 1.97E+00 | 5.65E-02 | GNG5,PAK1,PIK3R1,PLA2G4A,PLCB1,PRKD1,RRAS2                                                             |
| 72  | Glutathione Redox Reactions I                            | 1.97E+00 | 1.25E-01 | GPX1,GPX7,MGST1                                                                                        |
| 73  | Neuregulin Signaling                                     | 1.96E+00 | 6.25E-02 | MYC,PIK3R1,PLCG1,PRKD1,PSEN1,RRAS2                                                                     |
| 74  | 14-3-3-mediated Signaling                                | 1.92E+00 | 5.51E-02 | CBL,PIK3R1,PLCB1,PLCG1,PRKD1,RRAS2,TUBA1B                                                              |
| 75  | Gαq Signaling                                            | 1.91E+00 | 5.06E-02 | CDC42,GNG5,PIK3R1,PLCB1,PLCG1,PLD3,PRKD1,RHOQ                                                          |
| 76  | Estrogen Receptor Signaling                              | 1.91E+00 | 3.96E-02 | BCL2,CACNA1C,GNG5,MYC,PAK1,PCNA,PIK3R1,PLCB1,PLCG1,PRKD1,RRAS2,TRRAP,VEGFA                             |
| 77  | Ephrin B Signaling                                       | 1.89E+00 | 6.94E-02 | CBL,CDC42,GNG5,ITSN1,PAK1                                                                              |
| 78  | Caveolar-mediated Endocytosis Signaling                  | 1.86E+00 | 6.85E-02 | ACTA2,FLNB,ITGB3,ITGB6,ITSN1                                                                           |
| 79  | Systemic Lupus Erythematosus In T Cell Signaling Pathway | 1.85E+00 | 3.89E-02 | CBL,CD28,CDC42,FCER1G,HLA-DMA,HLA-DMB,ICOS,PIK3R1,PLCG1,RDX,RHOQ,RRAS2,TRGV9                           |
| 80  | Axonal Guidance Signaling                                | 1.85E+00 | 3.51E-02 | ACTR3,CDC42,FES,GNG5,ITSN1,PAK1,PIK3R1,PLCB1,PLCG1,PLXND1,PRKD1,RASA1,RRAS2,SEMA4A,SRGAP1,TUBA1B,VEGFA |
| 81  | Neuroinflammation Signaling Pathway                      | 1.84E+00 | 4.01E-02 | BACE2,BCL2,HLA-DMA,HLA-DMB,IFNG,IL1R1,IRAK3,NCF2,PIK3R1,PLA2G4A,PLCG1,PSEN1                            |
| 82  | SAPK/JNK Signaling                                       | 1.84E+00 | 5.88E-02 | CDC42,FCER1G,GNG5,PIK3R1,RRAS2,TRGV9                                                                   |
| 83  | Erythropoietin Signaling                                 | 1.79E+00 | 6.58E-02 | CBL,PIK3R1,PLCG1,PRKD1,RRAS2                                                                           |
| 84  | GDNF Family Ligand-Receptor Interactions                 | 1.79E+00 | 6.58E-02 | CDC42,PIK3R1,PLCG1,RASA1,RRAS2                                                                         |
| 85  | CXCR4 Signaling                                          | 1.78E+00 | 4.79E-02 | CDC42,GNG5,PAK1,PIK3R1,PLCB1,PRKD1,RHOQ,RRAS2                                                          |
| 86  | PD-1, PD-L1 cancer immunotherapy pathway                 | 1.76E+00 | 5.66E-02 | CD28,HLA-DMA,HLA-DMB,IFNG,PIK3R1,PLCG1                                                                 |
| 87  | Agrin Interactions at Neuromuscular Junction             | 1.75E+00 | 6.41E-02 | ACTA2,CDC42,ITGB3,PAK1,RRAS2                                                                           |
| 88  | Germ Cell-Sertoli Cell Junction Signaling                | 1.73E+00 | 4.68E-02 | ACTA2,CDC42,JUP,PAK1,PIK3R1,RHOQ,RRAS2,TUBA1B                                                          |
| 89  | HIF1α Signaling                                          | 1.72E+00 | 4.39E-02 | BRAF,HK2,HSPA2,NCF2,PIK3R1,PLCG1,PRKD1,RRAS2,VEGFA                                                     |
| 90  | Systemic Lupus Erythematosus In B Cell Signaling Pathway | 1.72E+00 | 4.00E-02 | BCL2,CARD11,CBL,FCGR2B,IFNG,MYC,PIK3R1,PIM2,PRKD1,RRAS2,TNFSF13                                        |
| 91  | Methylthiopropionate Biosynthesis                        | 1.71E+00 | 1.00E+00 | ADI1                                                                                                   |
| 92  | Hereditary Breast Cancer Signaling                       | 1.71E+00 | 5.00E-02 | CDK1,HLTF,PIK3R1,POLR2E,RFC4,RRAS2,SMARCB1                                                             |
| 93  | Renal Cell Carcinoma Signaling                           | 1.71E+00 | 6.25E-02 | CDC42,PAK1,PIK3R1,RRAS2,VEGFA                                                                          |
| 94  | Role of MAPK Signaling in the Pathogenesis of Influenza  | 1.71E+00 | 6.25E-02 | BCL2,IFNG,PLA2G4A,PLA2G7,RRAS2                                                                         |
| 95  | CREB Signaling in Neurons                                | 1.70E+00 | 4.35E-02 | CACNA1C,GNG5,GRIA4,PIK3R1,PLCB1,PLCG1,POLR2E,PRKD1,RRAS2                                               |
| 96  | LPS-stimulated MAPK Signaling                            | 1.66E+00 | 6.10E-02 | CDC42,PAK1,PIK3R1,PRKD1,RRAS2                                                                          |
| 97  | mTOR Signaling                                           | 1.66E+00 | 4.29E-02 | CDC42,PIK3R1,PLD3,PRKD1,RHOQ,RPS4X,RPSA,RRAS2,VEGFA                                                    |
| 98  | G Protein Signaling Mediated by Tubby                    | 1.66E+00 | 9.68E-02 | GNG5,PLCB1,PLCG1                                                                                       |
| 99  | Glucose and Glucose-1-phosphate Degradation              | 1.66E+00 | 1.67E-01 | HK2,RGN                                                                                                |
| 100 | Acetone Degradation I (to Methylglyoxal)                 | 1.66E+00 | 9.68E-02 | CYP1B1,CYP2S1,PTGR2                                                                                    |
| 101 | BER pathway                                              | 1.66E+00 | 1.67E-01 | FEN1,PCNA                                                                                              |

|     |                                                                           |          |          |                                                             |
|-----|---------------------------------------------------------------------------|----------|----------|-------------------------------------------------------------|
| 102 | Rac Signaling                                                             | 1.66E+00 | 5.36E-02 | ACTR3,CDC42,NCF2,PAK1,PIK3R1,RRAS2                          |
| 103 | Unfolded protein response                                                 | 1.63E+00 | 7.14E-02 | BCL2,EIF2AK3,HSPA2,P4HB                                     |
| 104 | NF-κB Signaling                                                           | 1.62E+00 | 4.47E-02 | BRAF,CARD11,FCER1G,IL1R1,IRAK3,PIK3R1,RRAS2,TRGV9           |
| 105 | Role of CHK Proteins in Cell Cycle Checkpoint Control                     | 1.61E+00 | 7.02E-02 | CDK1,PCNA,PLK1,RFC4                                         |
| 106 | RhoGDI Signaling                                                          | 1.61E+00 | 4.44E-02 | ACTA2,ACTR3,ARHGEF18,CDC42,GNG5,PAK1,RDX,RHOQ               |
| 107 | Ephrin Receptor Signaling                                                 | 1.61E+00 | 4.44E-02 | ACTR3,CDC42,GNG5,ITSN1,PAK1,RASA1,RRAS2,VEGFA               |
| 108 | IL-4 Signaling                                                            | 1.60E+00 | 5.88E-02 | HLA-DMA,HLA-DMB,IL13RA1,PIK3R1,RRAS2                        |
| 109 | PDGF Signaling                                                            | 1.59E+00 | 5.81E-02 | MYC,PIK3R1,PLCG1,RASA1,RRAS2                                |
| 110 | Cancer Drug Resistance By Drug Efflux                                     | 1.59E+00 | 6.90E-02 | BRAF,mir-181,PIK3R1,RRAS2                                   |
| 111 | p38 MAPK Signaling                                                        | 1.56E+00 | 5.08E-02 | EEF2K,HMGN1,IL1R1,IRAK3,MYC,PLA2G4A                         |
| 112 | Cytotoxic T Lymphocyte-mediated Apoptosis of Target Cells                 | 1.56E+00 | 8.82E-02 | BCL2,FCER1G,TRGV9                                           |
| 113 | Role of JAK2 in Hormone-like Cytokine Signaling                           | 1.56E+00 | 8.82E-02 | HLTF,PRLR,SH2B3                                             |
| 114 | Role of Osteoblasts, Osteoclasts and Chondrocytes in Rheumatoid Arthritis | 1.55E+00 | 4.09E-02 | ACP5,BCL2,CBL,IFNG,IL1R1,ITGB3,PIK3R1,SMAD5,SMAD9           |
| 115 | Semaphorin Signaling in Neurons                                           | 1.54E+00 | 6.67E-02 | CDC42,FES,PAK1,RHOQ                                         |
| 116 | CTLA4 Signaling in Cytotoxic T Lymphocytes                                | 1.53E+00 | 5.62E-02 | CD28,FCER1G,PIK3R1,PLCG1,TRGV9                              |
| 117 | DNA Methylation and Transcriptional Repression Signaling                  | 1.52E+00 | 8.57E-02 | H4C13,H4C9,RBBP4                                            |
| 118 | Production of Nitric Oxide and Reactive Oxygen Species in Macrophages     | 1.51E+00 | 4.26E-02 | CDC42,IFNG,IRF8,NCF2,PIK3R1,PLCG1,PRKD1,RHOQ                |
| 119 | OX40 Signaling Pathway                                                    | 1.51E+00 | 5.56E-02 | BCL2,FCER1G,HLA-DMA,HLA-DMB,TRGV9                           |
| 120 | Synaptic Long Term Depression                                             | 1.50E+00 | 4.23E-02 | CACNA1C,GRIA4,PLA2G4A,PLA2G7,PLCB1,PLCG1,PRKD1,RRAS2        |
| 121 | Th17 Activation Pathway                                                   | 1.49E+00 | 5.49E-02 | FCER1G,IFNG,IL1R1,IRAK3,TRGV9                               |
| 122 | Aldosterone Signaling in Epithelial Cells                                 | 1.46E+00 | 4.43E-02 | DNAJC22,DNAJC8,HSPA2,PIK3R1,PLCB1,PLCG1,PRKD1               |
| 123 | Clathrin-mediated Endocytosis Signaling                                   | 1.45E+00 | 4.15E-02 | ACTA2,ACTR3,CBL,CDC42,ITGB3,ITGB6,PIK3R1,VEGFA              |
| 124 | ERK/MAPK Signaling                                                        | 1.45E+00 | 4.15E-02 | BRAF,ETS2,MYC,PAK1,PIK3R1,PLA2G4A,PLCG1,RRAS2               |
| 125 | Regulation of Actin-based Motility by Rho                                 | 1.44E+00 | 5.32E-02 | ACTA2,ACTR3,CDC42,PAK1,RHOQ                                 |
| 126 | FAK Signaling                                                             | 1.42E+00 | 5.26E-02 | ACTA2,PAK1,PIK3R1,PLCG1,RRAS2                               |
| 127 | UDP-D-xylose and UDP-D-glucuronate Biosynthesis                           | 1.42E+00 | 5.00E-01 | UGDH                                                        |
| 128 | Palmitate Biosynthesis I (Animals)                                        | 1.42E+00 | 5.00E-01 | OXSM                                                        |
| 129 | Sulfate Activation for Sulfonation                                        | 1.42E+00 | 5.00E-01 | PAPSS2                                                      |
| 130 | Fatty Acid Biosynthesis Initiation II                                     | 1.42E+00 | 5.00E-01 | OXSM                                                        |
| 131 | Natural Killer Cell Signaling                                             | 1.41E+00 | 4.06E-02 | CDC42,FCER1G,HSPA2,IFNG,PAK1,PIK3R1,PLCG1,RRAS2             |
| 132 | Communication between Innate and Adaptive Immune Cells                    | 1.41E+00 | 5.21E-02 | CD28,FCER1G,IFNG,TNFSF13,TRGV9                              |
| 133 | TGF-β Signaling                                                           | 1.41E+00 | 5.21E-02 | BCL2,CDC42,RRAS2,SMAD5,SMAD9                                |
| 134 | Eicosanoid Signaling                                                      | 1.41E+00 | 6.06E-02 | PLA2G4A,PLA2G7,PTGDS,TBXAS1                                 |
| 135 | Antigen Presentation Pathway                                              | 1.40E+00 | 7.69E-02 | HLA-DMA,HLA-DMB,IFNG                                        |
| 136 | Gap Junction Signaling                                                    | 1.40E+00 | 4.04E-02 | ACTA2,GRIA4,PIK3R1,PLCB1,PLCG1,PRKD1,RRAS2,TUBA1B           |
| 137 | Synaptic Long Term Potentiation                                           | 1.40E+00 | 4.65E-02 | CACNA1C,GRIA4,PLCB1,PLCG1,PRKD1,RRAS2                       |
| 138 | p70S6K Signaling                                                          | 1.40E+00 | 4.65E-02 | EEF2K,PIK3R1,PLCB1,PLCG1,PRKD1,RRAS2                        |
| 139 | HMGB1 Signaling                                                           | 1.37E+00 | 4.24E-02 | CDC42,IFNG,IL1R1,PIK3R1,RHOQ,RRAS2,TNFSF13                  |
| 140 | Glioblastoma Multiforme Signaling                                         | 1.37E+00 | 4.24E-02 | CDC42,MYC,PIK3R1,PLCB1,PLCG1,RHOQ,RRAS2                     |
| 141 | Senescence Pathway                                                        | 1.37E+00 | 3.64E-02 | ASXL3,BRAF,CACNA1C,CDK1,ETS2,PIK3R1,RRAS2,SMAD5,SMAD9,YPEL3 |



|              |                                                                                                       |                      |              |                                                                                                           |
|--------------|-------------------------------------------------------------------------------------------------------|----------------------|--------------|-----------------------------------------------------------------------------------------------------------|
| 142          | Adipogenesis pathway                                                                                  | 1.33E+00             | 4.48E-02     | DGKD,GTF2H1,RBBP4,SAP30L,SMAD5,SMAD9                                                                      |
| 143          | Neuropathic Pain Signaling In Dorsal Horn Neurons                                                     | 1.33E+00             | 4.95E-02     | GRIA4,PIK3R1,PLCB1,PLCG1,PRKD1                                                                            |
| 144          | Retinol Biosynthesis                                                                                  | 1.32E+00             | 7.14E-02     | DDHD2,PNPLA4,RDH13                                                                                        |
| 145          | Insulin Secretion Signaling Pathway                                                                   | 1.32E+00             | 3.70E-02     | CACNA1C,EIF2AK3,EIF2S1,PC,PIK3R1,PLCB1,PLCG1,PRKD1,PRLR                                                   |
|              | <b>Data2</b>                                                                                          |                      |              |                                                                                                           |
| <b>S.No.</b> | <b>Ingenuity Canonical Pathways</b>                                                                   | <b>-log(p-value)</b> | <b>Ratio</b> | <b>Molecules</b>                                                                                          |
| 1            | Atherosclerosis Signaling                                                                             | 4.53E+00             | 7.09E-02     | ALOX15,CCL2,CCR2,CCR3,CXCL8,CXCR4,PLAAT2,SERPINA1,TNFRSF12A                                               |
| 2            | Granulocyte Adhesion and Diapedesis                                                                   | 3.38E+00             | 5.00E-02     | CCL2,CCL23,CCL3,CCL3L3,CCL4,CLDN5,CXCL8,CXCR4,MMP19                                                       |
| 3            | Agranulocyte Adhesion and Diapedesis                                                                  | 3.16E+00             | 4.66E-02     | CCL2,CCL23,CCL3,CCL3L3,CCL4,CLDN5,CXCL8,CXCR4,MMP19                                                       |
| 4            | Gai Signaling                                                                                         | 3.03E+00             | 5.60E-02     | ADCY4,ADORA3,CHRM4,CNR2,P2RY14,RGS12,RGS14                                                                |
| 5            | Breast Cancer Regulation by Stathmin1                                                                 | 2.93E+00             | 2.88E-02     | ADGRE1,ADORA3,ARHGEF4,C3AR1,CCR2,CCR3,CHRM4,CNR2,E2F2,GPR141,GPR34,GPR87,P2RY14,P2RY2,PIK3R6,PTGDR2,TACR2 |
| 6            | Differential Regulation of Cytokine Production in Macrophages and T Helper Cells by IL-17A and IL-17F | 2.88E+00             | 1.67E-01     | CCL2,CCL3,CCL4                                                                                            |
| 7            | Role of Hypercytokinemia/hyperchemokine in the Pathogenesis of Influenza                              | 2.71E+00             | 9.30E-02     | CCL2,CCL3,CCL4,CXCL8                                                                                      |
| 8            | G-Protein Coupled Receptor Signaling                                                                  | 2.67E+00             | 3.68E-02     | ADCY4,ADORA3,CHRM4,CNR2,DUSP1,P2RY14,PDE2A,PIK3R6,RGS12,RGS14                                             |
| 9            | cAMP-mediated signaling                                                                               | 2.66E+00             | 3.95E-02     | ADCY4,ADORA3,CHRM4,CNR2,DUSP1,P2RY14,PDE2A,RGS12,RGS14                                                    |
| 10           | Coronavirus Pathogenesis Pathway                                                                      | 2.57E+00             | 4.67E-02     | CCL2,CXCL8,E2F2,FOS,PTGS2,RPS4Y1,RPS4Y2                                                                   |
| 11           | Differential Regulation of Cytokine Production in Intestinal Epithelial Cells by IL-17A and IL-17F    | 2.56E+00             | 1.30E-01     | CCL2,CCL3,CCL4                                                                                            |
| 12           | Chemokine Signaling                                                                                   | 2.50E+00             | 6.25E-02     | CCL2,CCL4,CCR3,CXCR4,FOS                                                                                  |
| 13           | Role of IL-17A in Arthritis                                                                           | 2.35E+00             | 7.41E-02     | CCL2,CXCL8,PIK3R6,PTGS2                                                                                   |
| 14           | Pathogenesis of Multiple Sclerosis                                                                    | 2.29E+00             | 2.22E-01     | CCL3,CCL4                                                                                                 |
| 15           | Endocannabinoid Neuronal Synapse Pathway                                                              | 2.28E+00             | 4.69E-02     | ADCY4,CACNG6,CNR2,FAAH,MGLL,PTGS2                                                                         |
| 16           | MSP-ROn Signaling Pathway                                                                             | 2.24E+00             | 6.90E-02     | CCL2,CCR2,IL3RA,PIK3R6                                                                                    |
| 17           | Communication between Innate and Adaptive Immune Cells                                                | 2.17E+00             | 5.21E-02     | CCL3,CCL3L3,CCL4,CXCL8,IGHG1                                                                              |
| 18           | Eicosanoid Signaling                                                                                  | 2.04E+00             | 6.06E-02     | ALOX15,LTC4S,PLAAT2,PTGS2                                                                                 |
| 19           | Sorbitol Degradation I                                                                                | 1.91E+00             | 1.00E+00     | SORD                                                                                                      |
| 20           | GDNF Family Ligand-Receptor Interactions                                                              | 1.84E+00             | 5.26E-02     | FOS,GFRA1,GFRA4,PIK3R6                                                                                    |
| 21           | Role of IL-17F in Allergic Inflammatory Airway Diseases                                               | 1.82E+00             | 7.14E-02     | CCL2,CCL4,CXCL8                                                                                           |
| 22           | Thyroid Cancer Signaling                                                                              | 1.78E+00             | 5.06E-02     | CXCL8,CXCR4,FOS,PIK3R6                                                                                    |
| 23           | IL-17 Signaling                                                                                       | 1.76E+00             | 5.00E-02     | CCL2,CXCL8,PIK3R6,PTGS2                                                                                   |
| 24           | Triacylglycerol Degradation                                                                           | 1.69E+00             | 6.38E-02     | DDHD2,FAAH,MGLL                                                                                           |
| 25           | CCR5 Signaling in Macrophages                                                                         | 1.53E+00             | 4.26E-02     | CACNG6,CCL3,CCL4,FOS                                                                                      |
| 26           | p53 Signaling                                                                                         | 1.48E+00             | 4.08E-02     | GADD45G,PIK3R6,PMAIP1,SFN                                                                                 |
| 27           | Opioid Signaling Pathway                                                                              | 1.46E+00             | 2.83E-02     | ADCY4,CACNG6,FOS,FOSB,RGS1,RGS12,RGS14                                                                    |
| 28           | VEGF Signaling                                                                                        | 1.46E+00             | 4.04E-02     | EIF1AY,PIK3R6,SFN,SH2D2A                                                                                  |
| 29           | Anandamide Degradation                                                                                | 1.44E+00             | 3.33E-01     | FAAH                                                                                                      |
| 30           | Biotin-carboxyl Carrier Protein Assembly                                                              | 1.44E+00             | 3.33E-01     | ACACB                                                                                                     |
| 31           | IL-17A Signaling in Gastric Cells                                                                     | 1.42E+00             | 8.00E-02     | CXCL8,FOS                                                                                                 |
| 32           | Relaxin Signaling                                                                                     | 1.41E+00             | 3.33E-02     | ADCY4,FOS,PDE2A,PIK3R6,RLN1                                                                               |

|    |                        |          |          |                                   |
|----|------------------------|----------|----------|-----------------------------------|
| 33 | IGF-1 Signaling        | 1.40E+00 | 3.85E-02 | FOS,IGFBP2,PIK3R6,SFN             |
| 34 | Gustation Pathway      | 1.37E+00 | 3.25E-02 | ADCY4,CACNG6,P2RY14,P2RY2,PDE2A   |
| 35 | CD40 Signaling         | 1.33E+00 | 4.62E-02 | FOS,PIK3R6,PTGS2                  |
| 36 | Osteoarthritis Pathway | 1.32E+00 | 2.84E-02 | ALPL,CXCL8,DDIT4,GDF5,NAMPT,PTGS2 |
