# Supplementary material for: Association between Arsenic Level, Gene Expression in Asian Population, and In Vitro Carcinogenic Bladder Tumor
Source: Hindawi journal article supplement (doi:10.1155/2022/3459855), 2022-01-01
Supplement: f5 [file 3459855.f5.pdf]

Table S4. Significant pathways in Data-1 and Data-2 (low, medium, and high concentrations) and the overlap between various combinations (highlighted in green).

| Data1 |          |                                                      |         |          |            |            |            |              |            |
|-------|----------|------------------------------------------------------|---------|----------|------------|------------|------------|--------------|------------|
| S.No. | Symbol   | Name                                                 | t.stat  | p.value  | X.log10.p. | FDR        | entrezgene | AffyID       | HGNC       |
| 1     | KDM6A    | lysine demethylase 6A                                | 24.622  | 4.94E-20 | 19.307     | 2.47E-16   | 7403       | 7403_at      | HGNC:12637 |
| 2     | KDM5C    | lysine demethylase 5C                                | 14.551  | 2.68E-14 | 13.572     | 6.70E-11   | 8242       | 8242_at      | HGNC:11114 |
| 3     | TMSB4Y   | thymosin beta 4 Y-linked                             | -13.063 | 3.47E-13 | 12.459     | 5.79E-10   | 9087       | 9087_at      | HGNC:11882 |
| 4     | PRKY     | protein kinase Y-linked (pseudogene)                 | -11.806 | 3.60E-12 | 11.444     | 4.50E-09   | 5616       | 5616_at      | HGNC:9444  |
| 5     | ZFX      | zinc finger protein X-linked                         | 11.047  | 1.61E-11 | 10.794     | 1.61E-08   | 7543       | 7543_at      | HGNC:12869 |
| 6     | EIF1AX   | eukaryotic translation initiation factor 1A X-linked | 10.8    | 2.66E-11 | 10.575     | 2.21E-08   | 1964       | 1964_at      | HGNC:3250  |
| 7     | SMC1A    | structural maintenance of chromosomes 1A             | 7.9299  | 1.59E-08 | 7.7977     | 1.14E-05   | 8243       | 8243_at      | HGNC:11111 |
| 8     | PRKX     | protein kinase X-linked                              | 7.3111  | 7.28E-08 | 7.1376     | 4.55E-05   | 5613       | 5613_at      | HGNC:9441  |
| 9     | DDX3X    | DEAD-box helicase 3 X-linked                         | 7.0964  | 1.25E-07 | 6.9037     | 6.93E-05   | 1654       | 1654_at      | HGNC:2745  |
| 10    | SCARNA9L | small Cajal body-specific RNA 9 like                 | 6.0741  | 1.74E-06 | 5.7593     | 0.00087011 | 100158262  | 100158262_at | HGNC:33559 |
| 11    | RPS4X    | ribosomal protein S4 X-linked                        | 6.0184  | 2.02E-06 | 5.6956     | 0.00091597 | 6191       | 6191_at      | HGNC:10424 |
| 12    | TXLNG    | taxilin gamma                                        | 5.9777  | 2.24E-06 | 5.649      | 0.00093476 | 55787      | 55787_at     | HGNC:18578 |
| 13    | PUDP     | pseudouridine 5'-phosphatase                         | 5.6264  | 5.69E-06 | 5.2447     | 0.0021892  | 8226       | 8226_at      | HGNC:16818 |
| 14    | MLLT3    | MLLT3 super elongation complex subunit               | 5.4228  | 9.80E-06 | 5.0087     | 0.0034999  | 4300       | 4300_at      | HGNC:7136  |
| 15    | SEPTIN6  | septin 6                                             | 5.2857  | 1.41E-05 | 4.8494     | 0.0047143  | 23157      | 23157_at     | HGNC:15848 |
| 16    | PNPLA4   | patatin like phospholipase domain containing 4       | 5.2284  | 1.65E-05 | 4.7826     | 0.00494    | 8228       | 8228_at      | HGNC:24887 |
| 17    | PIM1     | Pim-1 proto-oncogene, serine/threonine kinase        | 5.2216  | 1.68E-05 | 4.7747     | 0.00494    | 5292       | 5292_at      | HGNC:8986  |
| 18    | CA5B     | carbonic anhydrase 5B                                | 5.0924  | 2.38E-05 | 4.6241     | 0.0065992  | 11238      | 11238_at     | HGNC:1378  |
| 19    | PID1     | phosphotyrosine interaction domain containing 1      | -5.052  | 2.65E-05 | 4.577      | 0.006969   | 55022      | 55022_at     | HGNC:26084 |
| 20    | CYP2S1   | cytochrome P450 family 2 subfamily S member 1        | -4.9809 | 3.21E-05 | 4.494      | 0.008014   | 29785      | 29785_at     | HGNC:15654 |
| 21    | HGSNAT   | heparan-alpha-glucosaminide N-acetyltransferase      | -4.8025 | 5.18E-05 | 4.2858     | 0.012328   | 138050     | 138050_at    | HGNC:26527 |

|    |          |                                                                     |         |            |        |          |        |           |            |
|----|----------|---------------------------------------------------------------------|---------|------------|--------|----------|--------|-----------|------------|
| 22 | ICOS     | inducible T cell costimulator                                       | 4.7815  | 5.48E-05   | 4.2612 | 0.012452 | 29851  | 29851_at  | HGNC:5351  |
| 23 | SASH1    | SAM and SH3 domain containing 1                                     | -4.7326 | 6.25E-05   | 4.2041 | 0.013584 | 23328  | 23328_at  | HGNC:19182 |
| 24 | IGSF6    | immunoglobulin superfamily member 6                                 | -4.6523 | 7.75E-05   | 4.1104 | 0.016152 | 10261  | 10261_at  | HGNC:5953  |
| 25 | ZRSR2    | zinc finger CCCH-type, RNA binding motif and serine/arginine rich 2 | 4.5985  | 8.96E-05   | 4.0478 | 0.017913 | 8233   | 8233_at   | HGNC:23019 |
| 26 | IGLV7-46 | immunoglobulin lambda variable 7-46 (gene/pseudogene)               | 4.5648  | 9.81E-05   | 4.0084 | 0.018858 | 28775  | 28775_at  | HGNC:5930  |
| 27 | LPIN2    | lipin 2                                                             | 4.3953  | 0.00015446 | 3.8112 | 0.027611 | 9663   | 9663_at   | HGNC:14450 |
| 28 | CLMN     | calmin                                                              | -4.3949 | 0.00015465 | 3.8106 | 0.027611 | 79789  | 79789_at  | HGNC:19972 |
| 29 | TGFBI    | transforming growth factor beta induced                             | -4.3764 | 0.00016248 | 3.7892 | 0.028008 | 7045   | 7045_at   | HGNC:11771 |
| 30 | BCL2     | BCL2 apoptosis regulator                                            | 4.3115  | 0.00019329 | 3.7138 | 0.03188  | 596    | 596_at    | HGNC:990   |
| 31 | FCER1A   | Fc fragment of IgE receptor 1a                                      | -4.303  | 0.0001977  | 3.704  | 0.03188  | 2205   | 2205_at   | HGNC:3609  |
| 32 | GPR15    | G protein-coupled receptor 15                                       | -4.262  | 0.00022056 | 3.6565 | 0.033716 | 2838   | 2838_at   | HGNC:4469  |
| 33 | SCPEP1   | serine carboxypeptidase 1                                           | -4.2554 | 0.00022452 | 3.6487 | 0.033716 | 59342  | 59342_at  | HGNC:29507 |
| 34 | HNMT     | histamine N-methyltransferase                                       | -4.2475 | 0.00022932 | 3.6396 | 0.033716 | 3176   | 3176_at   | HGNC:5028  |
| 35 | PLA2G4A  | phospholipase A2 group IVA                                          | -4.1982 | 0.00026151 | 3.5825 | 0.037351 | 5321   | 5321_at   | HGNC:9035  |
| 36 | LDLRAD3  | low density lipoprotein receptor class A domain containing 3        | -4.0888 | 0.00034976 | 3.4562 | 0.047278 | 143458 | 143458_at | HGNC:27046 |
| 37 | CPM      | carboxypeptidase M                                                  | -4.0886 | 0.00034992 | 3.456  | 0.047278 | 1368   | 1368_at   | HGNC:2311  |
| 38 | GLCCI1   | glucocorticoid induced 1                                            | 4.0512  | 0.00038643 | 3.4129 | 0.050836 | 113263 | 113263_at | HGNC:18713 |
| 39 | SLC2A9   | solute carrier family 2 member 9                                    | -3.9919 | 0.00045211 | 3.3448 | 0.057952 | 56606  | 56606_at  | HGNC:13446 |
| 40 | UBE2E2   | ubiquitin conjugating enzyme E2 E2                                  | -3.9608 | 0.00049092 | 3.309  | 0.061353 | 7325   | 7325_at   | HGNC:12478 |
| 41 | TNFSF13  | TNF superfamily member 13                                           | -3.9216 | 0.00054434 | 3.2641 | 0.06637  | 8741   | 8741_at   | HGNC:11928 |
| 42 | MS4A6A   | membrane spanning 4-domains A6A                                     | -3.8984 | 0.00057868 | 3.2376 | 0.068877 | 64231  | 64231_at  | HGNC:13375 |
| 43 | KIAA0930 | KIAA0930                                                            | -3.8852 | 0.00059918 | 3.2224 | 0.069658 | 23313  | 23313_at  | HGNC:1314  |
| 44 | LAX1     | lymphocyte transmembrane adaptor 1                                  | 3.8556  | 0.00064771 | 3.1886 | 0.073009 | 54900  | 54900_at  | HGNC:26005 |
| 45 | EPB41L3  | erythrocyte membrane protein band 4.1 like 3                        | -3.846  | 0.00066419 | 3.1777 | 0.073009 | 23136  | 23136_at  | HGNC:3380  |

|    |          |                                                                    |         |            |        |          |        |           |            |
|----|----------|--------------------------------------------------------------------|---------|------------|--------|----------|--------|-----------|------------|
| 46 | CCDC88A  | coiled-coil domain containing 88A                                  | -3.8317 | 0.0006896  | 3.1614 | 0.073009 | 55704  | 55704_at  | HGNC:25523 |
| 47 | IDH1     | isocitrate dehydrogenase (NADP(+)) 1                               | -3.8086 | 0.00073267 | 3.1351 | 0.073009 | 3417   | 3417_at   | HGNC:5382  |
| 48 | SLC36A4  | solute carrier family 36 member 4                                  | -3.805  | 0.00073975 | 3.1309 | 0.073009 | 120103 | 120103_at | HGNC:19660 |
| 49 | DPP4     | dipeptidyl peptidase 4                                             | 3.8049  | 0.00073993 | 3.1308 | 0.073009 | 1803   | 1803_at   | HGNC:3009  |
| 50 | ANKRD50  | ankyrin repeat domain 50                                           | -3.8023 | 0.00074491 | 3.1279 | 0.073009 | 57182  | 57182_at  | HGNC:29223 |
| 51 | LACC1    | laccase domain containing 1                                        | -3.799  | 0.00075143 | 3.1241 | 0.073009 | 144811 | 144811_at | HGNC:26789 |
| 52 | HLA-DPB2 | major histocompatibility complex, class II, DP beta 2 (pseudogene) | -3.7949 | 0.00075945 | 3.1195 | 0.073009 | 3116   | 3116_at   | HGNC:4941  |
| 53 | OASL     | 2'-5'-oligoadenylate synthetase like                               | 3.7782  | 0.00079339 | 3.1005 | 0.074833 | 8638   | 8638_at   | HGNC:8090  |
| 54 | GASK1B   | golgi associated kinase 1B                                         | -3.7704 | 0.0008099  | 3.0916 | 0.074976 | 51313  | 51313_at  | HGNC:25312 |
| 55 | SERPINB8 | serpin family B member 8                                           | -3.75   | 0.00085416 | 3.0685 | 0.077094 | 5271   | 5271_at   | HGNC:8952  |
| 56 | SETD7    | SET domain containing 7, histone lysine methyltransferase          | -3.7458 | 0.00086362 | 3.0637 | 0.077094 | 80854  | 80854_at  | HGNC:30412 |
| 57 | RTN1     | reticulon 1                                                        | -3.7245 | 0.00091304 | 3.0395 | 0.078809 | 6252   | 6252_at   | HGNC:10467 |
| 58 | OGFRL1   | opioid growth factor receptor like 1                               | -3.7239 | 0.00091436 | 3.0389 | 0.078809 | 79627  | 79627_at  | HGNC:21378 |
| 59 | CPVL     | carboxypeptidase vitellogenic like                                 | -3.6851 | 0.0010118  | 2.9949 | 0.084715 | 54504  | 54504_at  | HGNC:14399 |
| 60 | DLEU1    | deleted in lymphocytic leukemia 1                                  | 3.6832  | 0.0010168  | 2.9928 | 0.084715 | 10301  | 10301_at  | HGNC:13747 |
| 61 | SLC31A1  | solute carrier family 31 member 1                                  | -3.6717 | 0.0010477  | 2.9798 | 0.08531  | 1317   | 1317_at   | HGNC:11016 |
| 62 | IRAK3    | interleukin 1 receptor associated kinase 3                         | -3.6679 | 0.0010581  | 2.9755 | 0.08531  | 11213  | 11213_at  | HGNC:17020 |
| 63 | C3orf14  | chromosome 3 open reading frame 14                                 | -3.6478 | 0.0011148  | 2.9528 | 0.08762  | 57415  | 57415_at  | HGNC:25024 |
| 64 | CTSO     | cathepsin O                                                        | -3.6429 | 0.0011292  | 2.9472 | 0.08762  | 1519   | 1519_at   | HGNC:2542  |
| 65 | GNG5     | G protein subunit gamma 5                                          | -3.6394 | 0.0011393  | 2.9434 | 0.08762  | 2787   | 2787_at   | HGNC:4408  |
| 66 | SYAP1    | synapse associated protein 1                                       | 3.6324  | 0.0011604  | 2.9354 | 0.087895 | 94056  | 94056_at  | HGNC:16273 |
| 67 | PLXDC2   | plexin domain containing 2                                         | -3.5342 | 0.001496   | 2.8251 | 0.11087  | 84898  | 84898_at  | HGNC:21013 |

|    |         |                                                                            |         |           |        |         |        |           |            |
|----|---------|----------------------------------------------------------------------------|---------|-----------|--------|---------|--------|-----------|------------|
| 68 | ENTPD1  | ectonucleoside triphosphate diphosphohydrolase 1                           | -3.5172 | 0.0015628 | 2.8061 | 0.11087 | 953    | 953_at    | HGNC:3363  |
| 69 | CREG1   | cellular repressor of E1A stimulated genes 1                               | -3.5163 | 0.0015662 | 2.8051 | 0.11087 | 8804   | 8804_at   | HGNC:2351  |
| 70 | PRCP    | prolylcarboxypeptidase                                                     | -3.5156 | 0.0015692 | 2.8043 | 0.11087 | 5547   | 5547_at   | HGNC:9344  |
| 71 | GLCE    | glucuronic acid epimerase                                                  | -3.5143 | 0.0015747 | 2.8028 | 0.11087 | 26035  | 26035_at  | HGNC:17855 |
| 72 | PIM2    | Pim-2 proto-oncogene, serine/threonine kinase                              | 3.49    | 0.001676  | 2.7757 | 0.11636 | 11040  | 11040_at  | HGNC:8987  |
| 73 | FAM118A | family with sequence similarity 118 member A                               | -3.4808 | 0.0017162 | 2.7654 | 0.11752 | 55007  | 55007_at  | HGNC:1313  |
| 74 | CDK6    | cyclin dependent kinase 6                                                  | 3.4464  | 0.0018745 | 2.7271 | 0.12576 | 1021   | 1021_at   | HGNC:1777  |
| 75 | SHTN1   | shootin 1                                                                  | -3.4438 | 0.0018868 | 2.7243 | 0.12576 | 57698  | 57698_at  | HGNC:29319 |
| 76 | NAPRT   | nicotinate phosphoribosyltransferase                                       | -3.4221 | 0.0019947 | 2.7001 | 0.1312  | 93100  | 93100_at  | HGNC:30450 |
| 77 | SMAD5   | SMAD family member 5                                                       | -3.4148 | 0.0020321 | 2.692  | 0.13193 | 4090   | 4090_at   | HGNC:6771  |
| 78 | CD300LB | CD300 molecule like family member b                                        | -3.4006 | 0.0021071 | 2.6763 | 0.13309 | 124599 | 124599_at | HGNC:30811 |
| 79 | CEBPG   | CCAAT enhancer binding protein gamma                                       | -3.4005 | 0.0021079 | 2.6762 | 0.13309 | 1054   | 1054_at   | HGNC:1837  |
| 80 | RNASE6  | ribonuclease A family member k6                                            | -3.3964 | 0.0021298 | 2.6717 | 0.13309 | 6039   | 6039_at   | HGNC:10048 |
| 81 | MPZL2   | myelin protein zero like 2                                                 | -3.3816 | 0.0022117 | 2.6553 | 0.1365  | 10205  | 10205_at  | HGNC:3496  |
| 82 | GBGT1   | globoside alpha-1,3-N-acetylgalactosaminyltransferase 1 (FORS blood group) | -3.3698 | 0.0022793 | 2.6422 | 0.13706 | 26301  | 26301_at  | HGNC:20460 |
| 83 | ABITRAM | actin binding transcription modulator                                      | -3.3626 | 0.0023214 | 2.6343 | 0.13706 | 54942  | 54942_at  | HGNC:1364  |
| 84 | QARS1   | glutaminyl-tRNA synthetase 1                                               | -3.3601 | 0.002336  | 2.6315 | 0.13706 | 5859   | 5859_at   | HGNC:9751  |
| 85 | FAR1    | fatty acyl-CoA reductase 1                                                 | -3.3581 | 0.0023479 | 2.6293 | 0.13706 | 84188  | 84188_at  | HGNC:26222 |
| 86 | FAH     | fumarylacetoacetate hydrolase                                              | -3.3466 | 0.0024176 | 2.6166 | 0.13706 | 2184   | 2184_at   | HGNC:3579  |
| 87 | SLC49A4 | solute carrier family 49 member 4                                          | -3.3451 | 0.002427  | 2.6149 | 0.13706 | 84925  | 84925_at  | HGNC:16628 |
| 88 | HLA-DMA | major histocompatibility complex, class II, DM alpha                       | -3.3421 | 0.0024456 | 2.6116 | 0.13706 | 3108   | 3108_at   | HGNC:4934  |
| 89 | PTGDR2  | prostaglandin D2 receptor 2                                                | -3.3409 | 0.002453  | 2.6103 | 0.13706 | 11251  | 11251_at  | HGNC:4502  |

|     |           |                                                     |         |           |        |         |        |           |            |
|-----|-----------|-----------------------------------------------------|---------|-----------|--------|---------|--------|-----------|------------|
| 90  | CST2      | cystatin SA                                         | -3.3384 | 0.0024683 | 2.6076 | 0.13706 | 1470   | 1470_at   | HGNC:2474  |
| 91  | FRY       | FRY microtubule binding protein                     | -3.3342 | 0.002495  | 2.6029 | 0.13706 | 10129  | 10129_at  | HGNC:20367 |
| 92  | GPX7      | glutathione peroxidase 7                            | 3.3261  | 0.0025469 | 2.594  | 0.13715 | 2882   | 2882_at   | HGNC:4559  |
| 93  | STS       | steroid sulfatase                                   | 3.3232  | 0.0025652 | 2.5909 | 0.13715 | 412    | 412_at    | HGNC:11425 |
| 94  | PLCB1     | phospholipase C beta 1                              | -3.3211 | 0.002579  | 2.5886 | 0.13715 | 23236  | 23236_at  | HGNC:15917 |
| 95  | SLC43A3   | solute carrier family 43 member 3                   | -3.3004 | 0.0027179 | 2.5658 | 0.14165 | 29015  | 29015_at  | HGNC:17466 |
| 96  | PLA2G15   | phospholipase A2 group XV                           | -3.3001 | 0.0027202 | 2.5654 | 0.14165 | 23659  | 23659_at  | HGNC:17163 |
| 97  | JDP2      | Jun dimerization protein 2                          | -3.2842 | 0.0028317 | 2.548  | 0.14594 | 122953 | 122953_at | HGNC:17546 |
| 98  | NAAA      | N-acylethanolamine acid amidase                     | -3.2791 | 0.0028681 | 2.5424 | 0.1463  | 27163  | 27163_at  | HGNC:736   |
| 99  | RBM3      | RNA binding motif protein 3                         | -3.2732 | 0.0029115 | 2.5359 | 0.14702 | 5935   | 5935_at   | HGNC:9900  |
| 100 | MAN2B1    | mannosidase alpha class 2B member 1                 | -3.2668 | 0.0029585 | 2.5289 | 0.1479  | 4125   | 4125_at   | HGNC:6826  |
| 101 | CTTNBP2NL | CTTNBP2 N-terminal like                             | -3.2581 | 0.0030239 | 2.5194 | 0.14842 | 55917  | 55917_at  | HGNC:25330 |
| 102 | ITK       | IL2 inducible T cell kinase                         | 3.2576  | 0.0030283 | 2.5188 | 0.14842 | 3702   | 3702_at   | HGNC:6171  |
| 103 | CD160     | CD160 molecule                                      | 3.2517  | 0.0030732 | 2.5124 | 0.14895 | 11126  | 11126_at  | HGNC:17013 |
| 104 | PLPP1     | phospholipid phosphatase 1                          | 3.2484  | 0.0030988 | 2.5088 | 0.14895 | 8611   | 8611_at   | HGNC:9228  |
| 105 | PSEN1     | presenilin 1                                        | -3.2421 | 0.0031489 | 2.5018 | 0.14992 | 5663   | 5663_at   | HGNC:9508  |
| 106 | GAPT      | GRB2 binding adaptor protein, transmembrane         | -3.215  | 0.0033708 | 2.4723 | 0.1576  | 202309 | 202309_at | HGNC:26588 |
| 107 | FAM13A    | family with sequence similarity 13 member A         | 3.2134  | 0.0033843 | 2.4705 | 0.1576  | 10144  | 10144_at  | HGNC:19367 |
| 108 | CD33      | CD33 molecule                                       | -3.2109 | 0.0034048 | 2.4679 | 0.1576  | 945    | 945_at    | HGNC:1659  |
| 109 | CFD       | complement factor D                                 | -3.1772 | 0.0037053 | 2.4312 | 0.16965 | 1675   | 1675_at   | HGNC:2771  |
| 110 | SLC24A4   | solute carrier family 24 member 4                   | -3.1737 | 0.0037378 | 2.4274 | 0.16965 | 123041 | 123041_at | HGNC:10978 |
| 111 | CNTLN     | centlein                                            | -3.17   | 0.0037719 | 2.4234 | 0.16965 | 54875  | 54875_at  | HGNC:23432 |
| 112 | CBL       | Cbl proto-oncogene                                  | -3.167  | 0.003801  | 2.4201 | 0.16965 | 867    | 867_at    | HGNC:1541  |
| 113 | CD93      | CD93 molecule                                       | -3.146  | 0.0040054 | 2.3974 | 0.17719 | 22918  | 22918_at  | HGNC:15855 |
| 114 | HLA-DMB   | major histocompatibility complex, class II, DM beta | -3.142  | 0.0040452 | 2.3931 | 0.17733 | 3109   | 3109_at   | HGNC:4935  |
| 115 | MGST1     | microsomal glutathione S-transferase 1              | -3.1372 | 0.0040934 | 2.3879 | 0.17733 | 4257   | 4257_at   | HGNC:7061  |
| 116 | NUDT16P1  | nudix hydrolase 16 pseudogene 1                     | -3.1328 | 0.0041393 | 2.3831 | 0.17733 | 152195 | 152195_at | HGNC:27189 |

|     |             |                                                       |         |           |        |         |           |              |            |
|-----|-------------|-------------------------------------------------------|---------|-----------|--------|---------|-----------|--------------|------------|
| 117 | FRG1BP      | FSHD region gene 1 family member B, pseudogene        | -3.1299 | 0.0041693 | 2.3799 | 0.17733 | 284802    | 284802_at    | HGNC:15792 |
| 118 | SNORD116-29 | small nucleolar RNA, C/D box 116-29                   | 3.1283  | 0.0041859 | 2.3782 | 0.17733 | 100033821 | 100033821_at | HGNC:33348 |
| 119 | GPR160      | G protein-coupled receptor 160                        | -3.1208 | 0.0042645 | 2.3701 | 0.17915 | 26996     | 26996_at     | HGNC:23693 |
| 120 | FGL2        | fibrinogen like 2                                     | -3.1109 | 0.0043705 | 2.3595 | 0.18029 | 10875     | 10875_at     | HGNC:3696  |
| 121 | GFI1        | growth factor independent 1 transcriptional repressor | 3.1097  | 0.0043838 | 2.3581 | 0.18029 | 2672      | 2672_at      | HGNC:4237  |
| 122 | CD1D        | CD1d molecule                                         | -3.1082 | 0.0043999 | 2.3566 | 0.18029 | 912       | 912_at       | HGNC:1637  |
| 123 | TFEC        | transcription factor EC                               | -3.0863 | 0.0046456 | 2.333  | 0.18786 | 22797     | 22797_at     | HGNC:11754 |
| 124 | ARID5B      | AT-rich interaction domain 5B                         | 3.0837  | 0.0046752 | 2.3302 | 0.18786 | 84159     | 84159_at     | HGNC:17362 |
| 125 | SNORD14E    | small nucleolar RNA, C/D box 14E                      | 3.0816  | 0.0046998 | 2.3279 | 0.18786 | 85391     | 85391_at     | HGNC:30354 |
| 126 | IRF8        | interferon regulatory factor 8                        | -3.0786 | 0.004735  | 2.3247 | 0.18786 | 3394      | 3394_at      | HGNC:5358  |
| 127 | CISH        | cytokine inducible SH2 containing protein             | 3.0678  | 0.0048621 | 2.3132 | 0.19138 | 1154      | 1154_at      | HGNC:1984  |
| 128 | TBXAS1      | thromboxane A synthase 1                              | -3.0412 | 0.0051925 | 2.2846 | 0.20213 | 6916      | 6916_at      | HGNC:11609 |
| 129 | FES         | FES proto-oncogene, tyrosine kinase                   | -3.0394 | 0.0052159 | 2.2827 | 0.20213 | 2242      | 2242_at      | HGNC:3657  |
| 130 | CRTAP       | cartilage associated protein                          | -3.0303 | 0.0053343 | 2.2729 | 0.20512 | 10491     | 10491_at     | HGNC:2379  |
| 131 | PAK1        | p21 (RAC1) activated kinase 1                         | -3.015  | 0.0055374 | 2.2567 | 0.21131 | 5058      | 5058_at      | HGNC:8590  |
| 132 | PCTP        | phosphatidylcholine transfer protein                  | -3.0062 | 0.0056594 | 2.2472 | 0.21262 | 58488     | 58488_at     | HGNC:8752  |
| 133 | PLD3        | phospholipase D family member 3                       | -3.0037 | 0.0056936 | 2.2446 | 0.21262 | 23646     | 23646_at     | HGNC:17158 |
| 134 | GBP5        | guanylate binding protein 5                           | 3.0033  | 0.0056995 | 2.2442 | 0.21262 | 115362    | 115362_at    | HGNC:19895 |
| 135 | APLP2       | amyloid beta precursor like protein 2                 | -2.9949 | 0.0058177 | 2.2352 | 0.21428 | 334       | 334_at       | HGNC:598   |
| 136 | TSHZ3       | teashirt zinc finger homeobox 3                       | -2.9941 | 0.0058297 | 2.2344 | 0.21428 | 57616     | 57616_at     | HGNC:30700 |
| 137 | MIS18BP1    | MIS18 binding protein 1                               | -2.9651 | 0.0062571 | 2.2036 | 0.22832 | 55320     | 55320_at     | HGNC:20190 |
| 138 | TYMS        | thymidylate synthetase                                | 2.9533  | 0.0064411 | 2.191  | 0.23064 | 7298      | 7298_at      | HGNC:12441 |
| 139 | KCTD3       | potassium channel tetramerization domain containing 3 | -2.9526 | 0.0064509 | 2.1904 | 0.23064 | 51133     | 51133_at     | HGNC:21305 |

|     |          |                                                                |         |           |        |         |        |           |            |
|-----|----------|----------------------------------------------------------------|---------|-----------|--------|---------|--------|-----------|------------|
| 140 | PDIA4    | protein disulfide isomerase family A member 4                  | 2.9521  | 0.0064591 | 2.1898 | 0.23064 | 9601   | 9601_at   | HGNC:30167 |
| 141 | PGAP1    | post-GPI attachment to proteins inositol deacylase 1           | 2.9438  | 0.0065916 | 2.181  | 0.23217 | 80055  | 80055_at  | HGNC:25712 |
| 142 | CD38     | CD38 molecule                                                  | 2.9436  | 0.006595  | 2.1808 | 0.23217 | 952    | 952_at    | HGNC:1667  |
| 143 | SULF2    | sulfatase 2                                                    | -2.9323 | 0.0067787 | 2.1689 | 0.23697 | 55959  | 55959_at  | HGNC:20392 |
| 144 | DAPK1    | death associated protein kinase 1                              | -2.917  | 0.0070349 | 2.1527 | 0.24422 | 1612   | 1612_at   | HGNC:2674  |
| 145 | SLC16A1  | solute carrier family 16 member 1                              | 2.9115  | 0.0071301 | 2.1469 | 0.24582 | 6566   | 6566_at   | HGNC:10922 |
| 146 | SERPINB2 | serpin family B member 2                                       | -2.9073 | 0.0072033 | 2.1425 | 0.24664 | 5055   | 5055_at   | HGNC:8584  |
| 147 | NUP210   | nucleoporin 210                                                | 2.902   | 0.0072959 | 2.1369 | 0.24811 | 23225  | 23225_at  | HGNC:30052 |
| 148 | GRK3     | G protein-coupled receptor kinase 3                            | -2.8968 | 0.0073874 | 2.1315 | 0.24952 | 157    | 157_at    | HGNC:290   |
| 149 | FUCA1    | alpha-L-fucosidase 1                                           | -2.8907 | 0.0074988 | 2.125  | 0.25159 | 2517   | 2517_at   | HGNC:4006  |
| 150 | SLAMF6   | SLAM family member 6                                           | 2.878   | 0.0077308 | 2.1118 | 0.25764 | 114836 | 114836_at | HGNC:21392 |
| 151 | ZNF516   | zinc finger protein 516                                        | -2.8722 | 0.0078414 | 2.1056 | 0.25847 | 9658   | 9658_at   | HGNC:28990 |
| 152 | PRLR     | prolactin receptor                                             | -2.8712 | 0.0078591 | 2.1046 | 0.25847 | 5618   | 5618_at   | HGNC:9446  |
| 153 | CD86     | CD86 molecule                                                  | -2.8664 | 0.007952  | 2.0995 | 0.25982 | 942    | 942_at    | HGNC:1705  |
| 154 | SPECC1   | sperm antigen with calponin homology and coiled-coil domains 1 | -2.8593 | 0.0080889 | 2.0921 | 0.26184 | 92521  | 92521_at  | HGNC:30615 |
| 155 | CD27     | CD27 molecule                                                  | 2.8563  | 0.0081478 | 2.089  | 0.26184 | 939    | 939_at    | HGNC:11922 |
| 156 | TPRA1    | transmembrane protein adipocyte associated 1                   | -2.8551 | 0.0081711 | 2.0877 | 0.26184 | 131601 | 131601_at | HGNC:30413 |
| 157 | SKAP2    | src kinase associated phosphoprotein 2                         | -2.8516 | 0.0082399 | 2.0841 | 0.26236 | 8935   | 8935_at   | HGNC:15687 |
| 158 | CCNA2    | cyclin A2                                                      | 2.8479  | 0.0083128 | 2.0803 | 0.26254 | 890    | 890_at    | HGNC:1578  |
| 159 | GPR174   | G protein-coupled receptor 174                                 | 2.8446  | 0.0083803 | 2.0767 | 0.26254 | 84636  | 84636_at  | HGNC:30245 |
| 160 | RHOH     | ras homolog family member H                                    | 2.8428  | 0.0084168 | 2.0749 | 0.26254 | 399    | 399_at    | HGNC:686   |
| 161 | IL13RA1  | interleukin 13 receptor subunit alpha 1                        | -2.8357 | 0.0085596 | 2.0675 | 0.26254 | 3597   | 3597_at   | HGNC:5974  |
| 162 | CARD8    | caspase recruitment domain family member 8                     | 2.8346  | 0.0085842 | 2.0663 | 0.26254 | 22900  | 22900_at  | HGNC:17057 |
| 163 | TRAV19   | T cell receptor alpha variable 19                              | 2.8316  | 0.0086458 | 2.0632 | 0.26254 | 28664  | 28664_at  | HGNC:12115 |
| 164 | SIRPA    | signal regulatory protein alpha                                | -2.8304 | 0.0086693 | 2.062  | 0.26254 | 140885 | 140885_at | HGNC:9662  |
| 165 | DOCK7    | dedicator of cytokinesis 7                                     | -2.8292 | 0.0086957 | 2.0607 | 0.26254 | 85440  | 85440_at  | HGNC:19190 |

|     |             |                                                     |         |           |        |         |           |              |            |
|-----|-------------|-----------------------------------------------------|---------|-----------|--------|---------|-----------|--------------|------------|
| 166 | ALDH2       | aldehyde dehydrogenase 2 family member              | -2.8281 | 0.0087181 | 2.0596 | 0.26254 | 217       | 217_at       | HGNC:404   |
| 167 | MAP3K3      | mitogen-activated protein kinase kinase kinase 3    | -2.8245 | 0.0087942 | 2.0558 | 0.26325 | 4215      | 4215_at      | HGNC:6855  |
| 168 | CPA3        | carboxypeptidase A3                                 | -2.8215 | 0.0088575 | 2.0527 | 0.26356 | 1359      | 1359_at      | HGNC:2298  |
| 169 | GAS7        | growth arrest specific 7                            | -2.8155 | 0.0089853 | 2.0465 | 0.26578 | 8522      | 8522_at      | HGNC:4169  |
| 170 | CLEC10A     | C-type lectin domain containing 10A                 | -2.8088 | 0.0091313 | 2.0395 | 0.26778 | 10462     | 10462_at     | HGNC:16916 |
| 171 | SNORA36A    | small nucleolar RNA, H/ACA box 36A                  | 2.8073  | 0.009163  | 2.038  | 0.26778 | 677817    | 677817_at    | HGNC:32628 |
| 172 | NCF2        | neutrophil cytosolic factor 2                       | -2.8031 | 0.009257  | 2.0335 | 0.26778 | 4688      | 4688_at      | HGNC:7661  |
| 173 | FHL3        | four and a half LIM domains 3                       | -2.7987 | 0.0093539 | 2.029  | 0.26778 | 2275      | 2275_at      | HGNC:3704  |
| 174 | GPRC5D      | G protein-coupled receptor class C group 5 member D | 2.7981  | 0.0093673 | 2.0284 | 0.26778 | 55507     | 55507_at     | HGNC:13310 |
| 175 | SLC25A24    | solute carrier family 25 member 24                  | -2.7978 | 0.0093741 | 2.0281 | 0.26778 | 29957     | 29957_at     | HGNC:20662 |
| 176 | ATP6V1B2    | ATPase H+ transporting V1 subunit B2                | -2.7952 | 0.0094314 | 2.0254 | 0.26788 | 526       | 526_at       | HGNC:854   |
| 177 | ACSS2       | acyl-CoA synthetase short chain family member 2     | -2.7903 | 0.0095422 | 2.0204 | 0.26884 | 55902     | 55902_at     | HGNC:15814 |
| 178 | KYNU        | kynureninase                                        | -2.7869 | 0.0096217 | 2.0167 | 0.26884 | 8942      | 8942_at      | HGNC:6469  |
| 179 | CLIC2       | chloride intracellular channel 2                    | -2.7867 | 0.0096263 | 2.0165 | 0.26884 | 1193      | 1193_at      | HGNC:2063  |
| 180 | HOPX        | HOP homeobox                                        | 2.7831  | 0.0097093 | 2.0128 | 0.26965 | 84525     | 84525_at     | HGNC:24961 |
| 181 | PCED1B      | PC-esterase domain containing 1B                    | 2.7791  | 0.0098015 | 2.0087 | 0.26966 | 91523     | 91523_at     | HGNC:28255 |
| 182 | ARRDC3      | arrestin domain containing 3                        | 2.7777  | 0.0098339 | 2.0073 | 0.26966 | 57561     | 57561_at     | HGNC:29263 |
| 183 | OFD1        | OFD1 centriole and centriolar satellite protein     | 2.7761  | 0.0098715 | 2.0056 | 0.26966 | 8481      | 8481_at      | HGNC:2567  |
| 184 | GRAMD4      | GRAM domain containing 4                            | -2.7699 | 0.010019  | 1.9992 | 0.27145 | 23151     | 23151_at     | HGNC:29113 |
| 185 | RPL22L1     | ribosomal protein L22 like 1                        | 2.7688  | 0.010046  | 1.998  | 0.27145 | 200916    | 200916_at    | HGNC:27610 |
| 186 | SNORD116-26 | small nucleolar RNA, C/D box 116-26                 | 2.7623  | 0.010201  | 1.9914 | 0.27415 | 100033438 | 100033438_at | HGNC:33092 |
| 187 | SNORD116-14 | small nucleolar RNA, C/D box 116-14                 | 2.7581  | 0.010304  | 1.987  | 0.27546 | 100033426 | 100033426_at | HGNC:33080 |
| 188 | B3GALT2     | beta-1,3-galactosyltransferase 2                    | -2.7533 | 0.010423  | 1.982  | 0.27714 | 8707      | 8707_at      | HGNC:917   |



|     |          |                                                      |         |          |        |         |        |           |            |
|-----|----------|------------------------------------------------------|---------|----------|--------|---------|--------|-----------|------------|
| 189 | H4C9     | H4 clustered histone 9                               | 2.7346  | 0.010895 | 1.9628 | 0.28818 | 8294   | 8294_at   | HGNC:4793  |
| 190 | CD40LG   | CD40 ligand                                          | 2.7279  | 0.011069 | 1.9559 | 0.29014 | 959    | 959_at    | HGNC:11935 |
| 191 | CARD6    | caspase recruitment domain family member 6           | -2.7272 | 0.011086 | 1.9552 | 0.29014 | 84674  | 84674_at  | HGNC:16394 |
| 192 | RASSF4   | Ras association domain family member 4               | -2.7239 | 0.011172 | 1.9519 | 0.29089 | 83937  | 83937_at  | HGNC:20793 |
| 193 | DIPK1A   | divergent protein kinase domain 1A                   | 2.7146  | 0.011421 | 1.9423 | 0.29582 | 388650 | 388650_at | HGNC:32213 |
| 194 | SLC38A5  | solute carrier family 38 member 5                    | 2.7085  | 0.011587 | 1.936  | 0.29857 | 92745  | 92745_at  | HGNC:18070 |
| 195 | ALDH3B1  | aldehyde dehydrogenase 3 family member B1            | -2.7008 | 0.011799 | 1.9281 | 0.30248 | 221    | 221_at    | HGNC:410   |
| 196 | GPX1     | glutathione peroxidase 1                             | -2.6956 | 0.011945 | 1.9228 | 0.30365 | 2876   | 2876_at   | HGNC:4553  |
| 197 | SEC11A   | SEC11 homolog A, signal peptidase complex subunit    | -2.6948 | 0.011966 | 1.922  | 0.30365 | 23478  | 23478_at  | HGNC:17718 |
| 198 | SLC44A1  | solute carrier family 44 member 1                    | -2.6856 | 0.012229 | 1.9126 | 0.3045  | 23446  | 23446_at  | HGNC:18798 |
| 199 | IGHV3-13 | immunoglobulin heavy variable 3-13                   | 2.6818  | 0.012339 | 1.9087 | 0.3045  | 28449  | 28449_at  | HGNC:5581  |
| 200 | CPPED1   | calcineurin like phosphoesterase domain containing 1 | -2.6806 | 0.012372 | 1.9075 | 0.3045  | 55313  | 55313_at  | HGNC:25632 |
| 201 | JAML     | junction adhesion molecule like                      | -2.6803 | 0.012383 | 1.9072 | 0.3045  | 120425 | 120425_at | HGNC:19084 |
| 202 | FRG1     | FSHD region gene 1                                   | -2.6791 | 0.012417 | 1.906  | 0.3045  | 2483   | 2483_at   | HGNC:3954  |
| 203 | H4C8     | H4 clustered histone 8                               | 2.6755  | 0.012522 | 1.9023 | 0.3045  | 8365   | 8365_at   | HGNC:4788  |
| 204 | MAML3    | mastermind like transcriptional coactivator 3        | -2.6755 | 0.012522 | 1.9023 | 0.3045  | 55534  | 55534_at  | HGNC:16272 |
| 205 | UAP1     | UDP-N-acetylglucosamine pyrophosphorylase 1          | 2.6753  | 0.012528 | 1.9021 | 0.3045  | 6675   | 6675_at   | HGNC:12457 |
| 206 | NLN      | neurolysin                                           | -2.6739 | 0.012571 | 1.9006 | 0.3045  | 57486  | 57486_at  | HGNC:16058 |
| 207 | TIGAR    | TP53 induced glycolysis regulatory phosphatase       | -2.6712 | 0.012649 | 1.8979 | 0.3045  | 57103  | 57103_at  | HGNC:1185  |
| 208 | VEGFA    | vascular endothelial growth factor A                 | -2.6705 | 0.01267  | 1.8972 | 0.3045  | 7422   | 7422_at   | HGNC:12680 |
| 209 | CD99L2   | CD99 molecule like 2                                 | -2.663  | 0.012894 | 1.8896 | 0.30716 | 83692  | 83692_at  | HGNC:18237 |
| 210 | ACER3    | alkaline ceramidase 3                                | -2.6623 | 0.012915 | 1.8889 | 0.30716 | 55331  | 55331_at  | HGNC:16066 |
| 211 | CST3     | cystatin C                                           | -2.6543 | 0.013161 | 1.8807 | 0.30716 | 1471   | 1471_at   | HGNC:2475  |
| 212 | SPTAN1   | spectrin alpha, non-erythrocytic 1                   | 2.653   | 0.013199 | 1.8794 | 0.30716 | 6709   | 6709_at   | HGNC:11273 |

|     |           |                                                        |         |          |        |         |        |           |            |
|-----|-----------|--------------------------------------------------------|---------|----------|--------|---------|--------|-----------|------------|
| 213 | RAB31     | RAB31, member RAS oncogene family                      | -2.6529 | 0.013202 | 1.8793 | 0.30716 | 11031  | 11031_at  | HGNC:9771  |
| 214 | SGPL1     | sphingosine-1-phosphate lyase 1                        | -2.6527 | 0.013208 | 1.8792 | 0.30716 | 8879   | 8879_at   | HGNC:10817 |
| 215 | H1-5      | H1.5 linker histone, cluster member                    | 2.6527  | 0.013211 | 1.8791 | 0.30716 | 3009   | 3009_at   | HGNC:4719  |
| 216 | NEK3      | NIMA related kinase 3                                  | -2.6499 | 0.013296 | 1.8763 | 0.30772 | 4752   | 4752_at   | HGNC:7746  |
| 217 | RNF135    | ring finger protein 135                                | -2.6379 | 0.013673 | 1.8641 | 0.31354 | 84282  | 84282_at  | HGNC:21158 |
| 218 | TLR8      | toll like receptor 8                                   | -2.6334 | 0.013819 | 1.8595 | 0.31354 | 51311  | 51311_at  | HGNC:15632 |
| 219 | ALG10     | ALG10 alpha-1,2-glucosyltransferase                    | -2.6307 | 0.013906 | 1.8568 | 0.31354 | 84920  | 84920_at  | HGNC:23162 |
| 220 | CYSLTR2   | cysteinyl leukotriene receptor 2                       | -2.6297 | 0.013939 | 1.8558 | 0.31354 | 57105  | 57105_at  | HGNC:18274 |
| 221 | TCN2      | transcobalamin 2                                       | -2.6276 | 0.014006 | 1.8537 | 0.31354 | 6948   | 6948_at   | HGNC:11653 |
| 222 | ITSN1     | intersectin 1                                          | -2.6257 | 0.014069 | 1.8517 | 0.31354 | 6453   | 6453_at   | HGNC:6183  |
| 223 | C20orf194 | chromosome 20 open reading frame 194                   | -2.6254 | 0.014077 | 1.8515 | 0.31354 | 25943  | 25943_at  | HGNC:17721 |
| 224 | ACTA2     | actin alpha 2, smooth muscle                           | 2.6253  | 0.01408  | 1.8514 | 0.31354 | 59     | 59_at     | HGNC:130   |
| 225 | RASSF2    | Ras association domain family member 2                 | -2.6244 | 0.014112 | 1.8504 | 0.31354 | 9770   | 9770_at   | HGNC:9883  |
| 226 | USP18     | ubiquitin specific peptidase 18                        | 2.6171  | 0.014351 | 1.8431 | 0.31606 | 11274  | 11274_at  | HGNC:12616 |
| 227 | MZB1      | marginal zone B and B1 cell specific protein           | 2.6171  | 0.014352 | 1.8431 | 0.31606 | 51237  | 51237_at  | HGNC:30125 |
| 228 | UBE2T     | ubiquitin conjugating enzyme E2 T                      | 2.6122  | 0.014515 | 1.8382 | 0.31751 | 29089  | 29089_at  | HGNC:25009 |
| 229 | SUSD4     | sushi domain containing 4                              | -2.6114 | 0.014545 | 1.8373 | 0.31751 | 55061  | 55061_at  | HGNC:25470 |
| 230 | CD1C      | CD1c molecule                                          | -2.6064 | 0.014715 | 1.8323 | 0.31936 | 911    | 911_at    | HGNC:1636  |
| 231 | CASP1     | caspase 1                                              | -2.6051 | 0.014757 | 1.831  | 0.31936 | 834    | 834_at    | HGNC:1499  |
| 232 | CALCRL    | calcitonin receptor like receptor                      | -2.6    | 0.014934 | 1.8258 | 0.32079 | 10203  | 10203_at  | HGNC:16709 |
| 233 | ENG       | endoglin                                               | -2.5968 | 0.015045 | 1.8226 | 0.32079 | 2022   | 2022_at   | HGNC:3349  |
| 234 | SNORA80E  | small nucleolar RNA, H/ACA box 80E                     | 2.5965  | 0.015055 | 1.8223 | 0.32079 | 677823 | 677823_at | HGNC:32635 |
| 235 | KCTD12    | potassium channel tetramerization domain containing 12 | -2.594  | 0.015144 | 1.8198 | 0.32079 | 115207 | 115207_at | HGNC:14678 |
| 236 | FOLR3     | folate receptor gamma                                  | -2.5934 | 0.015165 | 1.8192 | 0.32079 | 2352   | 2352_at   | HGNC:3795  |
| 237 | PADI2     | peptidyl arginine deiminase 2                          | -2.5915 | 0.015229 | 1.8173 | 0.32079 | 11240  | 11240_at  | HGNC:18341 |
| 238 | GM2A      | GM2 ganglioside activator                              | -2.5903 | 0.015273 | 1.8161 | 0.32079 | 2760   | 2760_at   | HGNC:4367  |
| 239 | HK2       | hexokinase 2                                           | -2.5863 | 0.015416 | 1.812  | 0.3218  | 3099   | 3099_at   | HGNC:4923  |
| 240 | PLA2G7    | phospholipase A2 group VII                             | -2.5853 | 0.015449 | 1.8111 | 0.3218  | 7941   | 7941_at   | HGNC:9040  |

|     |             |                                             |         |          |        |         |           |              |            |
|-----|-------------|---------------------------------------------|---------|----------|--------|---------|-----------|--------------|------------|
| 241 | MORN2       | MORN repeat containing 2                    | -2.5784 | 0.015699 | 1.8041 | 0.32564 | 729967    | 729967_at    | HGNC:30166 |
| 242 | TPMT        | thiopurine S-methyltransferase              | -2.5762 | 0.015779 | 1.8019 | 0.32594 | 7172      | 7172_at      | HGNC:12014 |
| 243 | RPS27A      | ribosomal protein S27a                      | -2.5733 | 0.015884 | 1.7991 | 0.32676 | 6233      | 6233_at      | HGNC:10417 |
| 244 | KSR1        | kinase suppressor of ras 1                  | -2.57   | 0.016006 | 1.7957 | 0.32793 | 8844      | 8844_at      | HGNC:6465  |
| 245 | RAB34       | RAB34, member RAS oncogene family           | -2.5623 | 0.016292 | 1.788  | 0.33243 | 83871     | 83871_at     | HGNC:16519 |
| 246 | ARSD        | arylsulfatase D                             | 2.5561  | 0.016527 | 1.7818 | 0.33585 | 414       | 414_at       | HGNC:717   |
| 247 | G6PC3       | glucose-6-phosphatase catalytic subunit 3   | -2.5444 | 0.016978 | 1.7701 | 0.34278 | 92579     | 92579_at     | HGNC:24861 |
| 248 | HAAO        | 3-hydroxyanthranilate 3,4-dioxygenase       | -2.5409 | 0.017114 | 1.7667 | 0.34278 | 23498     | 23498_at     | HGNC:4796  |
| 249 | VCAN        | versican                                    | -2.5406 | 0.017128 | 1.7663 | 0.34278 | 1462      | 1462_at      | HGNC:2464  |
| 250 | GATA6       | GATA binding protein 6                      | -2.5402 | 0.017143 | 1.7659 | 0.34278 | 2627      | 2627_at      | HGNC:4174  |
| 251 | SNORD116-24 | small nucleolar RNA, C/D box 116-24         | 2.5374  | 0.017253 | 1.7631 | 0.34362 | 100033435 | 100033435_at | HGNC:33090 |
| 252 | SHCBP1      | SHC binding and spindle associated 1        | 2.5235  | 0.017811 | 1.7493 | 0.35102 | 79801     | 79801_at     | HGNC:29547 |
| 253 | UBXN2B      | UBX domain protein 2B                       | -2.5212 | 0.017907 | 1.747  | 0.35102 | 137886    | 137886_at    | HGNC:27035 |
| 254 | FRRS1       | ferric chelate reductase 1                  | -2.5206 | 0.017929 | 1.7464 | 0.35102 | 391059    | 391059_at    | HGNC:27622 |
| 255 | PLK1        | polo like kinase 1                          | 2.5206  | 0.017932 | 1.7464 | 0.35102 | 5347      | 5347_at      | HGNC:9077  |
| 256 | UBE2A       | ubiquitin conjugating enzyme E2 A           | -2.5179 | 0.018043 | 1.7437 | 0.35102 | 7319      | 7319_at      | HGNC:12472 |
| 257 | JAK3        | Janus kinase 3                              | 2.5178  | 0.018046 | 1.7436 | 0.35102 | 3718      | 3718_at      | HGNC:6193  |
| 258 | CCL2        | C-C motif chemokine ligand 2                | 2.5066  | 0.018513 | 1.7325 | 0.35377 | 6347      | 6347_at      | HGNC:10618 |
| 259 | SERTAD3     | SERTA domain containing 3                   | -2.5051 | 0.018579 | 1.731  | 0.35377 | 29946     | 29946_at     | HGNC:17931 |
| 260 | SCARNA5     | small Cajal body-specific RNA 5             | 2.5024  | 0.018691 | 1.7284 | 0.35377 | 677775    | 677775_at    | HGNC:32561 |
| 261 | NCEH1       | neutral cholesterol ester hydrolase 1       | -2.5011 | 0.018749 | 1.727  | 0.35377 | 57552     | 57552_at     | HGNC:29260 |
| 262 | DCBLD1      | discoidin, CUB and LCCL domain containing 1 | -2.4988 | 0.018845 | 1.7248 | 0.35377 | 285761    | 285761_at    | HGNC:21479 |
| 263 | SLC37A3     | solute carrier family 37 member 3           | 2.4983  | 0.018865 | 1.7243 | 0.35377 | 84255     | 84255_at     | HGNC:20651 |
| 264 | HPGDS       | hematopoietic prostaglandin D synthase      | -2.4973 | 0.01891  | 1.7233 | 0.35377 | 27306     | 27306_at     | HGNC:17890 |
| 265 | SLC7A7      | solute carrier family 7 member 7            | -2.4972 | 0.018913 | 1.7232 | 0.35377 | 9056      | 9056_at      | HGNC:11065 |
| 266 | NPC2        | NPC intracellular cholesterol transporter 2 | -2.4962 | 0.018956 | 1.7222 | 0.35377 | 10577     | 10577_at     | HGNC:14537 |

|     |             |                                                         |         |          |        |         |        |           |            |
|-----|-------------|---------------------------------------------------------|---------|----------|--------|---------|--------|-----------|------------|
| 267 | FMO5        | flavin containing dimethylaniline monooxygenase 5       | -2.4913 | 0.019171 | 1.7174 | 0.35377 | 2330   | 2330_at   | HGNC:3773  |
| 268 | NRG1        | neuregulin 1                                            | -2.4907 | 0.019198 | 1.7168 | 0.35377 | 3084   | 3084_at   | HGNC:7997  |
| 269 | IL18        | interleukin 18                                          | -2.4888 | 0.01928  | 1.7149 | 0.35377 | 3606   | 3606_at   | HGNC:5986  |
| 270 | GZMA        | granzyme A                                              | 2.4884  | 0.019297 | 1.7145 | 0.35377 | 3001   | 3001_at   | HGNC:4708  |
| 271 | IGHV1OR15-9 | immunoglobulin heavy variable 1/OR15-9 (non-functional) | 2.4872  | 0.01935  | 1.7133 | 0.35377 | 390531 | 390531_at | HGNC:5569  |
| 272 | MCTP1       | multiple C2 and transmembrane domain containing 1       | -2.4844 | 0.019473 | 1.7106 | 0.35377 | 79772  | 79772_at  | HGNC:26183 |
| 273 | PGD         | phosphogluconate dehydrogenase                          | -2.4833 | 0.019524 | 1.7094 | 0.35377 | 5226   | 5226_at   | HGNC:8891  |
| 274 | LOC648987   | uncharacterized LOC648987                               | -2.4824 | 0.01956  | 1.7086 | 0.35377 | 648987 | 648987_at |            |
| 275 | SGMS2       | sphingomyelin synthase 2                                | -2.4821 | 0.019576 | 1.7083 | 0.35377 | 166929 | 166929_at | HGNC:28395 |
| 276 | LMAN1       | lectin, mannose binding 1                               | 2.4818  | 0.019588 | 1.708  | 0.35377 | 3998   | 3998_at   | HGNC:6631  |
| 277 | SPATS2      | spermatogenesis associated serine rich 2                | 2.4815  | 0.019603 | 1.7077 | 0.35377 | 65244  | 65244_at  | HGNC:18650 |
| 278 | SOCS3       | suppressor of cytokine signaling 3                      | 2.4776  | 0.019777 | 1.7038 | 0.35441 | 9021   | 9021_at   | HGNC:19391 |
| 279 | VSIG4       | V-set and immunoglobulin domain containing 4            | -2.4775 | 0.01978  | 1.7038 | 0.35441 | 11326  | 11326_at  | HGNC:17032 |
| 280 | RBIS        | ribosomal biogenesis factor                             | -2.473  | 0.019984 | 1.6993 | 0.35678 | 401466 | 401466_at | HGNC:32235 |
| 281 | GOLIM4      | golgi integral membrane protein 4                       | -2.4681 | 0.020206 | 1.6945 | 0.35946 | 27333  | 27333_at  | HGNC:15448 |
| 282 | SLC14A1     | solute carrier family 14 member 1 (Kidd blood group)    | 2.4657  | 0.020317 | 1.6921 | 0.35998 | 6563   | 6563_at   | HGNC:10918 |
| 283 | PLBD1       | phospholipase B domain containing 1                     | -2.4635 | 0.020422 | 1.6899 | 0.35998 | 79887  | 79887_at  | HGNC:26215 |
| 284 | NBPF1       | NBPF member 1                                           | -2.4622 | 0.020478 | 1.6887 | 0.35998 | 55672  | 55672_at  | HGNC:26088 |
| 285 | DPYD        | dihydropyrimidine dehydrogenase                         | -2.4596 | 0.020601 | 1.6861 | 0.35998 | 1806   | 1806_at   | HGNC:3012  |
| 286 | RAB32       | RAB32, member RAS oncogene family                       | -2.4578 | 0.020683 | 1.6844 | 0.35998 | 10981  | 10981_at  | HGNC:9772  |
| 287 | TNFSF13B    | TNF superfamily member 13b                              | -2.4576 | 0.020693 | 1.6842 | 0.35998 | 10673  | 10673_at  | HGNC:11929 |
| 288 | MIR29A      | microRNA 29a                                            | -2.4566 | 0.020739 | 1.6832 | 0.35998 | 407021 | 407021_at | HGNC:31616 |
| 289 | NIPSNAP3B   | nipsnap homolog 3B                                      | -2.4522 | 0.020948 | 1.6788 | 0.36138 | 55335  | 55335_at  | HGNC:23641 |

|     |             |                                                               |         |          |        |         |           |              |            |
|-----|-------------|---------------------------------------------------------------|---------|----------|--------|---------|-----------|--------------|------------|
| 290 | EEF1DP3     | eukaryotic translation elongation factor 1 delta pseudogene 3 | -2.4503 | 0.021037 | 1.677  | 0.36138 | 196549    | 196549_at    | HGNC:30486 |
| 291 | SEC11C      | SEC11 homolog C, signal peptidase complex subunit             | 2.4484  | 0.021132 | 1.6751 | 0.36138 | 90701     | 90701_at     | HGNC:23400 |
| 292 | PCID2       | PCI domain containing 2                                       | 2.4478  | 0.021159 | 1.6745 | 0.36138 | 55795     | 55795_at     | HGNC:25653 |
| 293 | RRM2        | ribonucleotide reductase regulatory subunit M2                | 2.4449  | 0.021297 | 1.6717 | 0.36138 | 6241      | 6241_at      | HGNC:10452 |
| 294 | ZBP1        | Z-DNA binding protein 1                                       | 2.4386  | 0.021603 | 1.6655 | 0.36138 | 81030     | 81030_at     | HGNC:16176 |
| 295 | IFFO2       | intermediate filament family orphan 2                         | 2.4379  | 0.021638 | 1.6648 | 0.36138 | 126917    | 126917_at    | HGNC:27006 |
| 296 | SYCP2       | synaptonemal complex protein 2                                | -2.4356 | 0.02175  | 1.6625 | 0.36138 | 10388     | 10388_at     | HGNC:11490 |
| 297 | PCLAF       | PCNA clamp associated factor                                  | 2.4318  | 0.021936 | 1.6589 | 0.36138 | 9768      | 9768_at      | HGNC:28961 |
| 298 | NAGA        | alpha-N-acetylgalactosaminidase                               | -2.4315 | 0.021951 | 1.6585 | 0.36138 | 4668      | 4668_at      | HGNC:7631  |
| 299 | CDKN3       | cyclin dependent kinase inhibitor 3                           | 2.431   | 0.021976 | 1.658  | 0.36138 | 1033      | 1033_at      | HGNC:1791  |
| 300 | CLCN5       | chloride voltage-gated channel 5                              | -2.4304 | 0.022002 | 1.6575 | 0.36138 | 1184      | 1184_at      | HGNC:2023  |
| 301 | SNORD116-25 | small nucleolar RNA, C/D box 116-25                           | 2.4302  | 0.022015 | 1.6573 | 0.36138 | 100033436 | 100033436_at | HGNC:33091 |
| 302 | SNAI3       | snail family transcriptional repressor 3                      | -2.4301 | 0.022019 | 1.6572 | 0.36138 | 333929    | 333929_at    | HGNC:18411 |
| 303 | S1PR3       | sphingosine-1-phosphate receptor 3                            | -2.428  | 0.022123 | 1.6552 | 0.36138 | 1903      | 1903_at      | HGNC:3167  |
| 304 | FPR3        | formyl peptide receptor 3                                     | -2.4275 | 0.022149 | 1.6547 | 0.36138 | 2359      | 2359_at      | HGNC:3828  |
| 305 | PTGDS       | prostaglandin D2 synthase                                     | -2.4269 | 0.022179 | 1.6541 | 0.36138 | 5730      | 5730_at      | HGNC:9592  |
| 306 | KIF11       | kinesin family member 11                                      | 2.426   | 0.022226 | 1.6531 | 0.36138 | 3832      | 3832_at      | HGNC:6388  |
| 307 | ATF4        | activating transcription factor 4                             | -2.4255 | 0.022247 | 1.6527 | 0.36138 | 468       | 468_at       | HGNC:786   |
| 308 | PCNA        | proliferating cell nuclear antigen                            | 2.4238  | 0.022332 | 1.6511 | 0.36138 | 5111      | 5111_at      | HGNC:8729  |
| 309 | ASB13       | ankyrin repeat and SOCS box containing 13                     | -2.4237 | 0.022338 | 1.651  | 0.36138 | 79754     | 79754_at     | HGNC:19765 |
| 310 | C2CD2L      | C2CD2 like                                                    | -2.42   | 0.022527 | 1.6473 | 0.36326 | 9854      | 9854_at      | HGNC:29000 |
| 311 | PIP5K1A     | phosphatidylinositol-4-phosphate 5-kinase type 1 alpha        | -2.4178 | 0.022635 | 1.6452 | 0.36384 | 8394      | 8394_at      | HGNC:8994  |

|     |             |                                                      |         |          |        |         |           |              |            |
|-----|-------------|------------------------------------------------------|---------|----------|--------|---------|-----------|--------------|------------|
| 312 | CRIM1       | cysteine rich transmembrane BMP regulator 1          | 2.416   | 0.022727 | 1.6435 | 0.36415 | 51232     | 51232_at     | HGNC:2359  |
| 313 | ARHGAP24    | Rho GTPase activating protein 24                     | -2.4129 | 0.02289  | 1.6404 | 0.36558 | 83478     | 83478_at     | HGNC:25361 |
| 314 | C9orf64     | chromosome 9 open reading frame 64                   | -2.4045 | 0.023324 | 1.6322 | 0.37133 | 84267     | 84267_at     | HGNC:28144 |
| 315 | SAMM50      | SAMM50 sorting and assembly machinery component      | -2.3998 | 0.023571 | 1.6276 | 0.37235 | 25813     | 25813_at     | HGNC:24276 |
| 316 | LMO2        | LIM domain only 2                                    | -2.3985 | 0.023638 | 1.6264 | 0.37235 | 4005      | 4005_at      | HGNC:6642  |
| 317 | PSAT1       | phosphoserine aminotransferase 1                     | 2.3961  | 0.023765 | 1.6241 | 0.37235 | 29968     | 29968_at     | HGNC:19129 |
| 318 | AP3M2       | adaptor related protein complex 3 subunit mu 2       | 2.395   | 0.023823 | 1.623  | 0.37235 | 10947     | 10947_at     | HGNC:570   |
| 319 | TRGV3       | T cell receptor gamma variable 3                     | -2.3944 | 0.023854 | 1.6224 | 0.37235 | 6976      | 6976_at      | HGNC:12288 |
| 320 | MYBL2       | MYB proto-oncogene like 2                            | 2.3918  | 0.023993 | 1.6199 | 0.37235 | 4605      | 4605_at      | HGNC:7548  |
| 321 | ZNF831      | zinc finger protein 831                              | 2.3906  | 0.024061 | 1.6187 | 0.37235 | 128611    | 128611_at    | HGNC:16167 |
| 322 | HPSE        | heparanase                                           | -2.39   | 0.024092 | 1.6181 | 0.37235 | 10855     | 10855_at     | HGNC:5164  |
| 323 | H3C8        | H3 clustered histone 8                               | 2.3894  | 0.024123 | 1.6176 | 0.37235 | 8355      | 8355_at      | HGNC:4772  |
| 324 | ERBB2       | erb-b2 receptor tyrosine kinase 2                    | 2.3874  | 0.024231 | 1.6156 | 0.37235 | 2064      | 2064_at      | HGNC:3430  |
| 325 | LAMP3       | lysosomal associated membrane protein 3              | 2.3873  | 0.024236 | 1.6155 | 0.37235 | 27074     | 27074_at     | HGNC:14582 |
| 326 | CCNB2       | cyclin B2                                            | 2.3865  | 0.024282 | 1.6147 | 0.37235 | 9133      | 9133_at      | HGNC:1580  |
| 327 | CORO1B      | coronin 1B                                           | -2.384  | 0.024418 | 1.6123 | 0.3733  | 57175     | 57175_at     | HGNC:2253  |
| 328 | GVINP1      | GTPase, very large interferon inducible pseudogene 1 | 2.3809  | 0.024589 | 1.6093 | 0.37381 | 387751    | 387751_at    | HGNC:25813 |
| 329 |             |                                                      | 2.3806  | 0.024602 | 1.609  | 0.37381 | 100507025 | 100507025_at |            |
| 330 | SNX30       | sorting nexin family member 30                       | -2.3739 | 0.02497  | 1.6026 | 0.37618 | 401548    | 401548_at    | HGNC:23685 |
| 331 | GLA         | galactosidase alpha                                  | -2.3739 | 0.024975 | 1.6025 | 0.37618 | 2717      | 2717_at      | HGNC:4296  |
| 332 | TRGV9       | T cell receptor gamma variable 9                     | 2.3724  | 0.025058 | 1.6011 | 0.37618 | 6983      | 6983_at      | HGNC:12295 |
| 333 | SNORD116-23 | small nucleolar RNA, C/D box 116-23                  | 2.3724  | 0.025058 | 1.601  | 0.37618 | 100033434 | 100033434_at | HGNC:33089 |
| 334 | C20orf27    | chromosome 20 open reading frame 27                  | -2.3683 | 0.025287 | 1.5971 | 0.3784  | 54976     | 54976_at     | HGNC:15873 |
| 335 | JMJD8       | jumonji domain containing 8                          | -2.3659 | 0.025422 | 1.5948 | 0.3784  | 339123    | 339123_at    | HGNC:14148 |
| 336 | CPNE8       | copine 8                                             | -2.3657 | 0.025433 | 1.5946 | 0.3784  | 144402    | 144402_at    | HGNC:23498 |
| 337 | FNIP2       | folliculin interacting protein 2                     | -2.3618 | 0.025656 | 1.5908 | 0.38037 | 57600     | 57600_at     | HGNC:29280 |

|     |              |                                               |         |          |        |         |           |              |            |
|-----|--------------|-----------------------------------------------|---------|----------|--------|---------|-----------|--------------|------------|
| 338 | LOC642131    | immunoglobulin IGHV1OR15-3-like pseudogene    | 2.3591  | 0.02581  | 1.5882 | 0.38037 | 642131    | 642131_at    |            |
| 339 | SLC25A40     | solute carrier family 25 member 40            | -2.3581 | 0.025866 | 1.5873 | 0.38037 | 55972     | 55972_at     | HGNC:29680 |
| 340 | LDOC1        | LDOC1 regulator of NFKB signaling             | -2.358  | 0.025871 | 1.5872 | 0.38037 | 23641     | 23641_at     | HGNC:6548  |
| 341 | WARS1        | tryptophanyl-tRNA synthetase 1                | -2.3549 | 0.026049 | 1.5842 | 0.38187 | 7453      | 7453_at      | HGNC:12729 |
| 342 | CALHM2       | calcium homeostasis modulator family member 2 | -2.3502 | 0.026324 | 1.5796 | 0.38202 | 51063     | 51063_at     | HGNC:23493 |
| 343 | CFP          | complement factor properdin                   | -2.3491 | 0.026389 | 1.5786 | 0.38202 | 5199      | 5199_at      | HGNC:8864  |
| 344 | BICD2        | BICD cargo adaptor 2                          | -2.3486 | 0.026416 | 1.5781 | 0.38202 | 23299     | 23299_at     | HGNC:17208 |
| 345 | GAS2L3       | growth arrest specific 2 like 3               | -2.3469 | 0.026518 | 1.5765 | 0.38202 | 283431    | 283431_at    | HGNC:27475 |
| 346 | BCORL1       | BCL6 corepressor like 1                       | -2.3466 | 0.026536 | 1.5762 | 0.38202 | 63035     | 63035_at     | HGNC:25657 |
| 347 | CHPT1        | choline phosphotransferase 1                  | -2.346  | 0.026573 | 1.5756 | 0.38202 | 56994     | 56994_at     | HGNC:17852 |
| 348 | LOC100132356 | uncharacterized LOC100132356                  | -2.3456 | 0.026594 | 1.5752 | 0.38202 | 100132356 | 100132356_at |            |
| 349 | BLVRB        | biliverdin reductase B                        | -2.3412 | 0.026853 | 1.571  | 0.38463 | 645       | 645_at       | HGNC:1063  |
| 350 | GK3P         | glycerol kinase 3 pseudogene                  | -2.3349 | 0.027233 | 1.5649 | 0.38897 | 2713      | 2713_at      | HGNC:4292  |
| 351 | MYC          | MYC proto-oncogene, bHLH transcription factor | 2.3321  | 0.027402 | 1.5622 | 0.38924 | 4609      | 4609_at      | HGNC:7553  |
| 352 | H3C2         | H3 clustered histone 2                        | 2.332   | 0.027408 | 1.5621 | 0.38924 | 8358      | 8358_at      | HGNC:4776  |
| 353 | SLC25A19     | solute carrier family 25 member 19            | -2.3283 | 0.027633 | 1.5586 | 0.39133 | 60386     | 60386_at     | HGNC:14409 |
| 354 | USP32P1      | ubiquitin specific peptidase 32 pseudogene 1  | -2.3266 | 0.027737 | 1.5569 | 0.39169 | 162632    | 162632_at    | HGNC:43570 |
| 355 | ANKRD18A     | ankyrin repeat domain 18A                     | -2.3187 | 0.028221 | 1.5494 | 0.39739 | 253650    | 253650_at    | HGNC:23643 |
| 356 | EVI5         | ecotropic viral integration site 5            | -2.3165 | 0.02836  | 1.5473 | 0.39823 | 7813      | 7813_at      | HGNC:3501  |
| 357 | DUSP3        | dual specificity phosphatase 3                | -2.3119 | 0.028647 | 1.5429 | 0.40006 | 1845      | 1845_at      | HGNC:3069  |
| 358 | LIPA         | lipase A, lysosomal acid type                 | -2.3119 | 0.02865  | 1.5429 | 0.40006 | 3988      | 3988_at      | HGNC:6617  |
| 359 | TRDV2        | T cell receptor delta variable 2              | 2.31    | 0.028767 | 1.5411 | 0.4001  | 28517     | 28517_at     | HGNC:12263 |
| 360 | MIRLET7G     | microRNA let-7g                               | -2.3093 | 0.028814 | 1.5404 | 0.4001  | 406890    | 406890_at    | HGNC:31485 |
| 361 | RPL13        | ribosomal protein L13                         | 2.308   | 0.028893 | 1.5392 | 0.4001  | 6137      | 6137_at      | HGNC:10303 |
| 362 | REXO2        | RNA exonuclease 2                             | 2.3057  | 0.029042 | 1.537  | 0.40105 | 25996     | 25996_at     | HGNC:17851 |

|     |           |                                                       |         |          |        |         |        |           |            |
|-----|-----------|-------------------------------------------------------|---------|----------|--------|---------|--------|-----------|------------|
| 363 | STAB1     | stabilin 1                                            | -2.302  | 0.029281 | 1.5334 | 0.40294 | 23166  | 23166_at  | HGNC:18628 |
| 364 | SAMD3     | sterile alpha motif domain containing 3               | 2.3002  | 0.029392 | 1.5318 | 0.40294 | 154075 | 154075_at | HGNC:21574 |
| 365 | ZNF101    | zinc finger protein 101                               | 2.2998  | 0.029421 | 1.5313 | 0.40294 | 94039  | 94039_at  | HGNC:12881 |
| 366 | NCAPG     | non-SMC condensin I complex subunit G                 | 2.2952  | 0.029716 | 1.527  | 0.40318 | 64151  | 64151_at  | HGNC:24304 |
| 367 | RPS26     | ribosomal protein S26                                 | -2.2948 | 0.029744 | 1.5266 | 0.40318 | 6231   | 6231_at   | HGNC:10414 |
| 368 | LOC401261 | uncharacterized LOC401261                             | -2.2947 | 0.029752 | 1.5265 | 0.40318 | 401261 | 401261_at |            |
| 369 | HSD17B12  | hydroxysteroid 17-beta dehydrogenase 12               | -2.2939 | 0.029804 | 1.5257 | 0.40318 | 51144  | 51144_at  | HGNC:18646 |
| 370 | NMUR1     | neuromedin U receptor 1                               | 2.2933  | 0.029841 | 1.5252 | 0.40318 | 10316  | 10316_at  | HGNC:4518  |
| 371 | CXCL16    | C-X-C motif chemokine ligand 16                       | -2.2883 | 0.030174 | 1.5204 | 0.40542 | 58191  | 58191_at  | HGNC:16642 |
| 372 | FDPSP2    | farnesyl diphosphate synthase pseudogene 2            | 2.2873  | 0.030238 | 1.5195 | 0.40542 | 619190 | 619190_at | HGNC:3633  |
| 373 | MANF      | mesencephalic astrocyte derived neurotrophic factor   | 2.2859  | 0.030331 | 1.5181 | 0.40542 | 7873   | 7873_at   | HGNC:15461 |
| 374 | H3C3      | H3 clustered histone 3                                | 2.2839  | 0.030463 | 1.5162 | 0.40542 | 8352   | 8352_at   | HGNC:4768  |
| 375 | CTSZ      | cathepsin Z                                           | -2.2827 | 0.030546 | 1.515  | 0.40542 | 1522   | 1522_at   | HGNC:2547  |
| 376 | HDAC3     | histone deacetylase 3                                 | -2.2816 | 0.030621 | 1.514  | 0.40542 | 8841   | 8841_at   | HGNC:4854  |
| 377 | ADPGK     | ADP dependent glucokinase                             | -2.2811 | 0.030653 | 1.5135 | 0.40542 | 83440  | 83440_at  | HGNC:25250 |
| 378 | NFAM1     | NFAT activating protein with ITAM motif 1             | -2.281  | 0.030656 | 1.5135 | 0.40542 | 150372 | 150372_at | HGNC:29872 |
| 379 | SEMA3C    | semaphorin 3C                                         | -2.2794 | 0.030764 | 1.512  | 0.40578 | 10512  | 10512_at  | HGNC:10725 |
| 380 | RGL1      | ral guanine nucleotide dissociation stimulator like 1 | -2.2741 | 0.031126 | 1.5069 | 0.40706 | 23179  | 23179_at  | HGNC:30281 |
| 381 | F11R      | F11 receptor                                          | -2.274  | 0.031131 | 1.5068 | 0.40706 | 50848  | 50848_at  | HGNC:14685 |
| 382 | SLAMF7    | SLAM family member 7                                  | 2.2732  | 0.031186 | 1.506  | 0.40706 | 57823  | 57823_at  | HGNC:21394 |
| 383 | TCTEX1D2  | Tctex1 domain containing 2                            | 2.2732  | 0.031187 | 1.506  | 0.40706 | 255758 | 255758_at | HGNC:28482 |
| 384 | ZNF510    | zinc finger protein 510                               | 2.2705  | 0.031369 | 1.5035 | 0.40837 | 22869  | 22869_at  | HGNC:29161 |
| 385 | ARF3      | ADP ribosylation factor 3                             | -2.2656 | 0.031704 | 1.4989 | 0.41166 | 377    | 377_at    | HGNC:654   |
| 386 | SLC36A1   | solute carrier family 36 member 1                     | -2.2637 | 0.031838 | 1.4971 | 0.41232 | 206358 | 206358_at | HGNC:18761 |
| 387 | CIDEB     | cell death inducing DFFA like effector b              | -2.2625 | 0.031923 | 1.4959 | 0.41236 | 27141  | 27141_at  | HGNC:1977  |
| 388 | LTA4H     | leukotriene A4 hydrolase                              | 2.2591  | 0.032156 | 1.4927 | 0.4143  | 4048   | 4048_at   | HGNC:6710  |
| 389 | MRPL35    | mitochondrial ribosomal protein L35                   | 2.2569  | 0.032313 | 1.4906 | 0.41525 | 51318  | 51318_at  | HGNC:14489 |



|     |          |                                                          |         |          |        |         |        |           |            |
|-----|----------|----------------------------------------------------------|---------|----------|--------|---------|--------|-----------|------------|
| 390 | DTL      | denticleless E3 ubiquitin protein ligase homolog         | 2.2555  | 0.03241  | 1.4893 | 0.41542 | 51514  | 51514_at  | HGNC:30288 |
| 391 | TPCN1    | two pore segment channel 1                               | -2.254  | 0.032516 | 1.4879 | 0.41573 | 53373  | 53373_at  | HGNC:18182 |
| 392 | TMEM272  | transmembrane protein 272                                | 2.2503  | 0.032783 | 1.4844 | 0.41707 | 283521 | 283521_at | HGNC:26737 |
| 393 | ADTRP    | androgen dependent TFPI regulating protein               | 2.2502  | 0.032788 | 1.4843 | 0.41707 | 84830  | 84830_at  | HGNC:21214 |
| 394 | GOLPH3L  | golgi phosphoprotein 3 like                              | 2.2461  | 0.033078 | 1.4805 | 0.41744 | 55204  | 55204_at  | HGNC:24882 |
| 395 | H3C12    | H3 clustered histone 12                                  | 2.2447  | 0.033179 | 1.4791 | 0.41744 | 8356   | 8356_at   | HGNC:4774  |
| 396 | CAMSAP1  | calmodulin regulated spectrin associated protein 1       | -2.2438 | 0.033246 | 1.4783 | 0.41744 | 157922 | 157922_at | HGNC:19946 |
| 397 | TALDO1   | transaldolase 1                                          | -2.243  | 0.033303 | 1.4775 | 0.41744 | 6888   | 6888_at   | HGNC:11559 |
| 398 | TK2      | thymidine kinase 2                                       | -2.2423 | 0.033354 | 1.4769 | 0.41744 | 7084   | 7084_at   | HGNC:11831 |
| 399 | FKBP11   | FKBP prolyl isomerase 11                                 | 2.2401  | 0.033514 | 1.4748 | 0.41744 | 51303  | 51303_at  | HGNC:18624 |
| 400 | H2BC14   | H2B clustered histone 14                                 | 2.2396  | 0.033551 | 1.4743 | 0.41744 | 8342   | 8342_at   | HGNC:4750  |
| 401 | CDC25B   | cell division cycle 25B                                  | 2.2395  | 0.033556 | 1.4742 | 0.41744 | 994    | 994_at    | HGNC:1726  |
| 402 | CD84     | CD84 molecule                                            | 2.2384  | 0.033641 | 1.4731 | 0.41744 | 8832   | 8832_at   | HGNC:1704  |
| 403 | SLC22A15 | solute carrier family 22 member 15                       | -2.2382 | 0.033654 | 1.473  | 0.41744 | 55356  | 55356_at  | HGNC:20301 |
| 404 | RDX      | radixin                                                  | -2.2338 | 0.033973 | 1.4689 | 0.41744 | 5962   | 5962_at   | HGNC:9944  |
| 405 | ZNF138   | zinc finger protein 138                                  | 2.2326  | 0.034062 | 1.4677 | 0.41744 | 7697   | 7697_at   | HGNC:12922 |
| 406 | SNORD48  | small nucleolar RNA, C/D box 48                          | 2.2324  | 0.034076 | 1.4676 | 0.41744 | 26801  | 26801_at  | HGNC:10188 |
| 407 | SOX5     | SRY-box transcription factor 5                           | 2.2309  | 0.034191 | 1.4661 | 0.41744 | 6660   | 6660_at   | HGNC:11201 |
| 408 | SLFN12   | schlafen family member 12                                | -2.2302 | 0.034239 | 1.4655 | 0.41744 | 55106  | 55106_at  | HGNC:25500 |
| 409 | H4C2     | H4 clustered histone 2                                   | 2.2302  | 0.03424  | 1.4655 | 0.41744 | 8366   | 8366_at   | HGNC:4789  |
| 410 | PEMT     | phosphatidylethanolamine N-methyltransferase             | -2.2288 | 0.034349 | 1.4641 | 0.41744 | 10400  | 10400_at  | HGNC:8830  |
| 411 | GINS2    | GINS complex subunit 2                                   | 2.2287  | 0.034352 | 1.464  | 0.41744 | 51659  | 51659_at  | HGNC:24575 |
| 412 | ATP11A   | ATPase phospholipid transporting 11A                     | -2.228  | 0.034404 | 1.4634 | 0.41744 | 23250  | 23250_at  | HGNC:13552 |
| 413 | TRANK1   | tetratricopeptide repeat and ankyrin repeat containing 1 | 2.224   | 0.034701 | 1.4597 | 0.41767 | 9881   | 9881_at   | HGNC:29011 |
| 414 | CD2      | CD2 molecule                                             | 2.2238  | 0.034716 | 1.4595 | 0.41767 | 914    | 914_at    | HGNC:1639  |
| 415 | ARRDC4   | arrestin domain containing 4                             | -2.2229 | 0.034784 | 1.4586 | 0.41767 | 91947  | 91947_at  | HGNC:28087 |

|     |          |                                                            |         |          |        |         |        |           |            |
|-----|----------|------------------------------------------------------------|---------|----------|--------|---------|--------|-----------|------------|
| 416 | IGHA1    | immunoglobulin heavy constant alpha 1                      | 2.2229  | 0.034785 | 1.4586 | 0.41767 | 3493   | 3493_at   | HGNC:5478  |
| 417 | RBMXL1   | RBMX like 1                                                | -2.222  | 0.034854 | 1.4577 | 0.41767 | 494115 | 494115_at | HGNC:25073 |
| 418 | GPRIN3   | GPRIN family member 3                                      | 2.2205  | 0.034965 | 1.4564 | 0.41767 | 285513 | 285513_at | HGNC:27733 |
| 419 | DMXL2    | Dmx like 2                                                 | -2.2197 | 0.035024 | 1.4556 | 0.41767 | 23312  | 23312_at  | HGNC:2938  |
| 420 | CD302    | CD302 molecule                                             | -2.2189 | 0.035092 | 1.4548 | 0.41767 | 9936   | 9936_at   | HGNC:30843 |
| 421 | HLA-DQB2 | major histocompatibility complex, class II, DQ beta 2      | -2.2152 | 0.03537  | 1.4514 | 0.41998 | 3120   | 3120_at   | HGNC:4945  |
| 422 | UBE2D1   | ubiquitin conjugating enzyme E2 D1                         | -2.2139 | 0.035471 | 1.4501 | 0.4201  | 7321   | 7321_at   | HGNC:12474 |
| 423 | MSR1     | macrophage scavenger receptor 1                            | -2.2117 | 0.035638 | 1.4481 | 0.4201  | 4481   | 4481_at   | HGNC:7376  |
| 424 | ADPRM    | ADP-ribose/CDP-alcohol diphosphatase, manganese dependent  | 2.2104  | 0.035737 | 1.4469 | 0.4201  | 56985  | 56985_at  | HGNC:30925 |
| 425 | MYPOP    | Myb related transcription factor, partner of profilin      | -2.2099 | 0.035777 | 1.4464 | 0.4201  | 339344 | 339344_at | HGNC:20178 |
| 426 | SLC43A2  | solute carrier family 43 member 2                          | -2.2086 | 0.03588  | 1.4451 | 0.4201  | 124935 | 124935_at | HGNC:23087 |
| 427 | CDK5     | cyclin dependent kinase 5                                  | -2.2085 | 0.035884 | 1.4451 | 0.4201  | 1020   | 1020_at   | HGNC:1774  |
| 428 | IGLV9-49 | immunoglobulin lambda variable 9-49                        | 2.2062  | 0.036062 | 1.4429 | 0.42121 | 28773  | 28773_at  | HGNC:5933  |
| 429 | CHP1     | calcineurin like EF-hand protein 1                         | -2.2035 | 0.036269 | 1.4405 | 0.42166 | 11261  | 11261_at  | HGNC:17433 |
| 430 | TOP2A    | DNA topoisomerase II alpha                                 | 2.2035  | 0.03627  | 1.4404 | 0.42166 | 7153   | 7153_at   | HGNC:11989 |
| 431 | MTFR1L   | mitochondrial fission regulator 1 like                     | -2.202  | 0.036386 | 1.4391 | 0.42182 | 56181  | 56181_at  | HGNC:28836 |
| 432 | LYPLA1   | lysophospholipase 1                                        | -2.2002 | 0.036529 | 1.4374 | 0.42182 | 10434  | 10434_at  | HGNC:6737  |
| 433 | LTB      | lymphotoxin beta                                           | 2.1991  | 0.036618 | 1.4363 | 0.42182 | 4050   | 4050_at   | HGNC:6711  |
| 434 | IGLV1-40 | immunoglobulin lambda variable 1-40                        | 2.1991  | 0.036621 | 1.4363 | 0.42182 | 28825  | 28825_at  | HGNC:5877  |
| 435 | DNTTIP1  | deoxynucleotidyltransferase terminal interacting protein 1 | -2.1943 | 0.036999 | 1.4318 | 0.42419 | 116092 | 116092_at | HGNC:16160 |
| 436 | SNORD14C | small nucleolar RNA, C/D box 14C                           | 2.1942  | 0.037003 | 1.4318 | 0.42419 | 85389  | 85389_at  | HGNC:30352 |
| 437 | SLC16A5  | solute carrier family 16 member 5                          | -2.1923 | 0.037157 | 1.43   | 0.42419 | 9121   | 9121_at   | HGNC:10926 |
| 438 | SLC46A2  | solute carrier family 46 member 2                          | -2.1922 | 0.037167 | 1.4298 | 0.42419 | 57864  | 57864_at  | HGNC:16055 |
| 439 | PDE4B    | phosphodiesterase 4B                                       | 2.1905  | 0.037302 | 1.4283 | 0.42476 | 5142   | 5142_at   | HGNC:8781  |
| 440 | HDAC9    | histone deacetylase 9                                      | 2.1879  | 0.037508 | 1.4259 | 0.42506 | 9734   | 9734_at   | HGNC:14065 |

|     |             |                                                          |         |          |        |         |           |              |            |
|-----|-------------|----------------------------------------------------------|---------|----------|--------|---------|-----------|--------------|------------|
| 441 | MIRLET7I    | microRNA let-7i                                          | -2.1877 | 0.037527 | 1.4257 | 0.42506 | 406891    | 406891_at    | HGNC:31486 |
| 442 | CCDC149     | coiled-coil domain containing 149                        | -2.1863 | 0.037639 | 1.4244 | 0.42506 | 91050     | 91050_at     | HGNC:25405 |
| 443 | IRF5        | interferon regulatory factor 5                           | -2.1859 | 0.037668 | 1.424  | 0.42506 | 3663      | 3663_at      | HGNC:6120  |
| 444 | SPNS1       | sphingolipid transporter 1 (putative)                    | -2.1836 | 0.037853 | 1.4219 | 0.42619 | 83985     | 83985_at     | HGNC:30621 |
| 445 | XCR1        | X-C motif chemokine receptor 1                           | -2.1819 | 0.037996 | 1.4203 | 0.42678 | 2829      | 2829_at      | HGNC:1625  |
| 446 | ARHGAP42    | Rho GTPase activating protein 42                         | 2.1809  | 0.038077 | 1.4193 | 0.42678 | 143872    | 143872_at    | HGNC:26545 |
| 447 | RNF157      | ring finger protein 157                                  | 2.1777  | 0.038339 | 1.4164 | 0.42877 | 114804    | 114804_at    | HGNC:29402 |
| 448 | KCNA3       | potassium voltage-gated channel subfamily A member 3     | 2.174   | 0.03864  | 1.413  | 0.42996 | 3738      | 3738_at      | HGNC:6221  |
| 449 |             |                                                          | 2.1737  | 0.038665 | 1.4127 | 0.42996 | 221016    | 221016_at    |            |
| 450 | FBXO36      | F-box protein 36                                         | -2.172  | 0.038808 | 1.4111 | 0.42996 | 130888    | 130888_at    | HGNC:27020 |
| 451 | ARL14EP     | ADP ribosylation factor like GTPase 14 effector protein  | 2.171   | 0.038887 | 1.4102 | 0.42996 | 120534    | 120534_at    | HGNC:26798 |
| 452 | CD81        | CD81 molecule                                            | 2.1673  | 0.039203 | 1.4067 | 0.42996 | 975       | 975_at       | HGNC:1701  |
| 453 | CADM1       | cell adhesion molecule 1                                 | -2.1664 | 0.039276 | 1.4059 | 0.42996 | 23705     | 23705_at     | HGNC:5951  |
| 454 | SNORD116-13 | small nucleolar RNA, C/D box 116-13                      | 2.1663  | 0.039282 | 1.4058 | 0.42996 | 100033425 | 100033425_at | HGNC:33079 |
| 455 | ANO5        | anoctamin 5                                              | -2.1657 | 0.039336 | 1.4052 | 0.42996 | 203859    | 203859_at    | HGNC:27337 |
| 456 | TTYH3       | tweety family member 3                                   | -2.1653 | 0.039368 | 1.4049 | 0.42996 | 80727     | 80727_at     | HGNC:22222 |
| 457 |             |                                                          | 2.1651  | 0.039383 | 1.4047 | 0.42996 | 100652927 | 100652927_at |            |
| 458 | SNORD49B    | small nucleolar RNA, C/D box 49B                         | 2.1643  | 0.039448 | 1.404  | 0.42996 | 692087    | 692087_at    | HGNC:32721 |
| 459 | TRBV5-1     | T cell receptor beta variable 5-1                        | 2.1639  | 0.039484 | 1.4036 | 0.42996 | 28614     | 28614_at     | HGNC:12218 |
| 460 | LTBR        | lymphotoxin beta receptor                                | -2.1627 | 0.039583 | 1.4025 | 0.42996 | 4055      | 4055_at      | HGNC:6718  |
| 461 | ATP8B2      | ATPase phospholipid transporting 8B2                     | 2.1596  | 0.039848 | 1.3996 | 0.42996 | 57198     | 57198_at     | HGNC:13534 |
| 462 | PRKCQ       | protein kinase C theta                                   | 2.1594  | 0.039866 | 1.3994 | 0.42996 | 5588      | 5588_at      | HGNC:9410  |
| 463 | STAT4       | signal transducer and activator of transcription 4       | 2.1593  | 0.039878 | 1.3993 | 0.42996 | 6775      | 6775_at      | HGNC:11365 |
| 464 | CRISPLD2    | cysteine rich secretory protein LCCL domain containing 2 | -2.1581 | 0.039974 | 1.3982 | 0.42996 | 83716     | 83716_at     | HGNC:25248 |
| 465 | RXRA        | retinoid X receptor alpha                                | -2.1548 | 0.04026  | 1.3951 | 0.42996 | 6256      | 6256_at      | HGNC:10477 |

|     |            |                                                                            |         |          |        |         |           |              |            |
|-----|------------|----------------------------------------------------------------------------|---------|----------|--------|---------|-----------|--------------|------------|
| 466 | SIAH1      | siah E3 ubiquitin protein ligase 1                                         | -2.1546 | 0.04028  | 1.3949 | 0.42996 | 6477      | 6477_at      | HGNC:10857 |
| 467 | RCBTB2     | RCC1 and BTB domain containing protein 2                                   | -2.1545 | 0.040285 | 1.3949 | 0.42996 | 1102      | 1102_at      | HGNC:1914  |
| 468 | RIC1       | RIC1 homolog, RAB6A GEF complex partner 1                                  | -2.1541 | 0.040317 | 1.3945 | 0.42996 | 57589     | 57589_at     | HGNC:17686 |
| 469 | SNORD116-1 | small nucleolar RNA, C/D box 116-1                                         | 2.1531  | 0.040403 | 1.3936 | 0.42996 | 100033413 | 100033413_at | HGNC:33067 |
| 470 | ANXA2      | annexin A2                                                                 | -2.1519 | 0.040506 | 1.3925 | 0.42996 | 302       | 302_at       | HGNC:537   |
| 471 | TMOD2      | tropomodulin 2                                                             | -2.1519 | 0.04051  | 1.3924 | 0.42996 | 29767     | 29767_at     | HGNC:11872 |
| 472 | GCSAML     | germinal center associated signaling and motility like                     | -2.1482 | 0.040825 | 1.3891 | 0.43187 | 148823    | 148823_at    | HGNC:29583 |
| 473 | EMILIN2    | elastin microfibril interfacier 2                                          | -2.1472 | 0.040915 | 1.3881 | 0.43187 | 84034     | 84034_at     | HGNC:19881 |
| 474 | HERC6      | HECT and RLD domain containing E3 ubiquitin protein ligase family member 6 | 2.1466  | 0.040969 | 1.3875 | 0.43187 | 55008     | 55008_at     | HGNC:26072 |
| 475 | BAIAP2     | BAR/IMD domain containing adaptor protein 2                                | -2.1455 | 0.041062 | 1.3866 | 0.43187 | 10458     | 10458_at     | HGNC:947   |
| 476 | FBXO5      | F-box protein 5                                                            | 2.1429  | 0.041286 | 1.3842 | 0.43187 | 26271     | 26271_at     | HGNC:13584 |
| 477 | ZNF385A    | zinc finger protein 385A                                                   | -2.1398 | 0.041567 | 1.3813 | 0.43187 | 25946     | 25946_at     | HGNC:17521 |
| 478 | LXN        | latexin                                                                    | 2.1394  | 0.041599 | 1.3809 | 0.43187 | 56925     | 56925_at     | HGNC:13347 |
| 479 | PNPLA1     | patatin like phospholipase domain containing 1                             | -2.1394 | 0.041602 | 1.3809 | 0.43187 | 285848    | 285848_at    | HGNC:21246 |
| 480 | ZNF486     | zinc finger protein 486                                                    | 2.139   | 0.041633 | 1.3806 | 0.43187 | 90649     | 90649_at     | HGNC:20807 |
| 481 | DUSP16     | dual specificity phosphatase 16                                            | 2.1385  | 0.041679 | 1.3801 | 0.43187 | 80824     | 80824_at     | HGNC:17909 |
| 482 | GCC2       | GRIP and coiled-coil domain containing 2                                   | 2.1374  | 0.041778 | 1.3791 | 0.43187 | 9648      | 9648_at      | HGNC:23218 |
| 483 | TRAV17     | T cell receptor alpha variable 17                                          | 2.1373  | 0.041784 | 1.379  | 0.43187 | 28666     | 28666_at     | HGNC:12113 |
| 484 | RNF217     | ring finger protein 217                                                    | -2.137  | 0.041813 | 1.3787 | 0.43187 | 154214    | 154214_at    | HGNC:21487 |
| 485 | MCM8       | minichromosome maintenance 8 homologous recombination repair factor        | 2.1357  | 0.041926 | 1.3775 | 0.43214 | 84515     | 84515_at     | HGNC:16147 |
| 486 | NMI        | N-myc and STAT interactor                                                  | 2.1299  | 0.042443 | 1.3722 | 0.43579 | 9111      | 9111_at      | HGNC:7854  |
| 487 | CORO2A     | coronin 2A                                                                 | -2.1298 | 0.042455 | 1.3721 | 0.43579 | 7464      | 7464_at      | HGNC:2255  |
| 488 | IL21R      | interleukin 21 receptor                                                    | 2.1263  | 0.042767 | 1.3689 | 0.43618 | 50615     | 50615_at     | HGNC:6006  |
| 489 | PBX3       | PBX homeobox 3                                                             | -2.1247 | 0.042911 | 1.3674 | 0.43618 | 5090      | 5090_at      | HGNC:8634  |

|     |          |                                                           |         |          |        |         |        |           |            |
|-----|----------|-----------------------------------------------------------|---------|----------|--------|---------|--------|-----------|------------|
| 490 | FEZ2     | fasciculation and elongation protein zeta 2               | -2.1236 | 0.043016 | 1.3664 | 0.43618 | 9637   | 9637_at   | HGNC:3660  |
| 491 | FAM118B  | family with sequence similarity 118 member B              | -2.1234 | 0.043036 | 1.3662 | 0.43618 | 79607  | 79607_at  | HGNC:26110 |
| 492 | TRAPPC3  | trafficking protein particle complex 3                    | -2.1232 | 0.043048 | 1.366  | 0.43618 | 27095  | 27095_at  | HGNC:19942 |
| 493 | CRIP2    | cysteine rich protein 2                                   | -2.1226 | 0.043103 | 1.3655 | 0.43618 | 1397   | 1397_at   | HGNC:2361  |
| 494 | ACRBP    | acrosin binding protein                                   | -2.1226 | 0.043104 | 1.3655 | 0.43618 | 84519  | 84519_at  | HGNC:17195 |
| 495 | IFITM1   | interferon induced transmembrane protein 1                | 2.1202  | 0.043326 | 1.3633 | 0.43755 | 8519   | 8519_at   | HGNC:5412  |
| 496 | NHS      | NHS actin remodeling regulator                            | -2.1167 | 0.043644 | 1.3601 | 0.43987 | 4810   | 4810_at   | HGNC:7820  |
| 497 | MEFV     | MEFV innate immunity regulator, pyrin                     | -2.1147 | 0.043826 | 1.3583 | 0.44012 | 4210   | 4210_at   | HGNC:6998  |
| 498 | H3C7     | H3 clustered histone 7                                    | 2.1137  | 0.043926 | 1.3573 | 0.44012 | 8968   | 8968_at   | HGNC:4773  |
| 499 | LONRF3   | LON peptidase N-terminal domain and ring finger 3         | -2.1136 | 0.043933 | 1.3572 | 0.44012 | 79836  | 79836_at  | HGNC:21152 |
| 500 | FCRL6    | Fc receptor like 6                                        | 2.1117  | 0.044105 | 1.3555 | 0.44096 | 343413 | 343413_at | HGNC:31910 |
| 501 | SLAMF1   | signaling lymphocytic activation molecule family member 1 | 2.1108  | 0.044194 | 1.3546 | 0.44097 | 6504   | 6504_at   | HGNC:10903 |
| 502 | FUCA2    | alpha-L-fucosidase 2                                      | -2.1091 | 0.044355 | 1.3531 | 0.44163 | 2519   | 2519_at   | HGNC:4008  |
| 503 | TSPAN5   | tetraspanin 5                                             | 2.1073  | 0.044521 | 1.3514 | 0.44163 | 10098  | 10098_at  | HGNC:17753 |
| 504 | APOBEC3G | apolipoprotein B mRNA editing enzyme catalytic subunit 3G | 2.1063  | 0.044612 | 1.3505 | 0.44163 | 60489  | 60489_at  | HGNC:17357 |
| 505 | STX11    | syntaxin 11                                               | -2.1063 | 0.044613 | 1.3505 | 0.44163 | 8676   | 8676_at   | HGNC:11429 |
| 506 | CMTM3    | CKLF like MARVEL transmembrane domain containing 3        | -2.105  | 0.044732 | 1.3494 | 0.44193 | 123920 | 123920_at | HGNC:19174 |
| 507 | ECRP     | ribonuclease A family member 2 pseudogene                 | -2.102  | 0.045022 | 1.3466 | 0.44311 | 643332 | 643332_at |            |
| 508 | S1PR1    | sphingosine-1-phosphate receptor 1                        | 2.1019  | 0.045029 | 1.3465 | 0.44311 | 1901   | 1901_at   | HGNC:3165  |
| 509 | TNFRSF17 | TNF receptor superfamily member 17                        | 2.1009  | 0.045127 | 1.3456 | 0.4432  | 608    | 608_at    | HGNC:11913 |
| 510 | TENT5C   | terminal nucleotidyltransferase 5C                        | 2.0981  | 0.045392 | 1.343  | 0.44484 | 54855  | 54855_at  | HGNC:24712 |
| 511 | SNORA1   | small nucleolar RNA, H/ACA box 1                          | 2.0969  | 0.045501 | 1.342  | 0.44484 | 677792 | 677792_at | HGNC:32557 |
| 512 | CSF2RA   | colony stimulating factor 2 receptor alpha subunit        | -2.0963 | 0.04556  | 1.3414 | 0.44484 | 1438   | 1438_at   | HGNC:2435  |

|     |              |                                                    |         |          |        |         |        |           |            |
|-----|--------------|----------------------------------------------------|---------|----------|--------|---------|--------|-----------|------------|
| 513 | CCNE2        | cyclin E2                                          | 2.0931  | 0.045872 | 1.3385 | 0.447   | 9134   | 9134_at   | HGNC:1590  |
| 514 | ZC2HC1A      | zinc finger C2HC-type containing 1A                | -2.0919 | 0.045986 | 1.3374 | 0.447   | 51101  | 51101_at  | HGNC:24277 |
| 515 | MAL          | mal, T cell differentiation protein                | 2.0912  | 0.04605  | 1.3368 | 0.447   | 4118   | 4118_at   | HGNC:6817  |
| 516 | IGHG1        | immunoglobulin heavy constant gamma 1 (G1m marker) | 2.0842  | 0.046737 | 1.3303 | 0.45234 | 3500   | 3500_at   | HGNC:5525  |
| 517 | PATL2        | PAT1 homolog 2                                     | 2.0837  | 0.046781 | 1.3299 | 0.45234 | 197135 | 197135_at | HGNC:33630 |
| 518 | ASGR2        | asialoglycoprotein receptor 2                      | -2.082  | 0.046947 | 1.3284 | 0.45307 | 433    | 433_at    | HGNC:743   |
| 519 | TMA16        | translation machinery associated 16 homolog        | -2.0785 | 0.047297 | 1.3252 | 0.45469 | 55319  | 55319_at  | HGNC:25638 |
| 520 | PILRA        | paired immunoglobulin like type 2 receptor alpha   | -2.0779 | 0.047351 | 1.3247 | 0.45469 | 29992  | 29992_at  | HGNC:20396 |
| 521 | ZFH3         | zinc finger homeobox 3                             | -2.0776 | 0.047388 | 1.3243 | 0.45469 | 463    | 463_at    | HGNC:777   |
| 522 | LCK          | LCK proto-oncogene, Src family tyrosine kinase     | 2.0747  | 0.047677 | 1.3217 | 0.45649 | 3932   | 3932_at   | HGNC:6524  |
| 523 | PLP2         | proteolipid protein 2                              | -2.0734 | 0.047798 | 1.3206 | 0.45649 | 5355   | 5355_at   | HGNC:9087  |
| 524 | SH3BGRL      | SH3 domain binding glutamate rich protein like     | -2.0721 | 0.047934 | 1.3194 | 0.45649 | 6451   | 6451_at   | HGNC:10823 |
| 525 | FLVCR2       | FLVCR heme transporter 2                           | -2.0707 | 0.04807  | 1.3181 | 0.45649 | 55640  | 55640_at  | HGNC:20105 |
| 526 | SLC45A3      | solute carrier family 45 member 3                  | -2.0705 | 0.048094 | 1.3179 | 0.45649 | 85414  | 85414_at  | HGNC:8642  |
| 527 | TPX2         | TPX2 microtubule nucleation factor                 | 2.0699  | 0.048149 | 1.3174 | 0.45649 | 22974  | 22974_at  | HGNC:1249  |
| 528 | TMEM156      | transmembrane protein 156                          | 2.0693  | 0.048215 | 1.3168 | 0.45649 | 80008  | 80008_at  | HGNC:26260 |
| 529 | MPP7         | membrane palmitoylated protein 7                   | -2.0659 | 0.048557 | 1.3137 | 0.4587  | 143098 | 143098_at | HGNC:26542 |
| 530 | TOMM34       | translocase of outer mitochondrial membrane 34     | -2.0651 | 0.048632 | 1.3131 | 0.4587  | 10953  | 10953_at  | HGNC:15746 |
| 531 | SNORA62      | small nucleolar RNA, H/ACA box 62                  | 2.0582  | 0.049342 | 1.3068 | 0.46379 | 6044   | 6044_at   | HGNC:10107 |
| 532 | CEP78        | centrosomal protein 78                             | 2.058   | 0.049358 | 1.3066 | 0.46379 | 84131  | 84131_at  | HGNC:25740 |
| 533 | ARL8A        | ADP ribosylation factor like GTPase 8A             | -2.0565 | 0.049515 | 1.3053 | 0.4644  | 127829 | 127829_at | HGNC:25192 |
| 534 | OSBPL1A      | oxysterol binding protein like 1A                  | -2.054  | 0.049772 | 1.303  | 0.46586 | 114876 | 114876_at | HGNC:16398 |
| 535 | CEP170       | centrosomal protein 170                            | -2.0532 | 0.049857 | 1.3023 | 0.46586 | 9859   | 9859_at   | HGNC:28920 |
|     | <b>Data2</b> |                                                    |         |          |        |         |        |           |            |

| S.No. | Symbol         | ID             | t.stat  | p.value    | X.log10.p. | FDR       | GB_ACC       | LOCUSLINK_ID |
|-------|----------------|----------------|---------|------------|------------|-----------|--------------|--------------|
| 1     | XLOC_008015    | A_19_P00327297 | 5.568   | 7.94E-07   | 6.1004     | 0.0036082 |              | NA           |
| 2     | XIST           | A_19_P00323692 | 5.2363  | 2.65E-06   | 5.5761     | 0.0036082 | NR_001564    | NA           |
| 3     | RGS1           | A_23_P97141    | -5.2161 | 2.85E-06   | 5.5445     | 0.0036082 | NM_002922    | 5996         |
| 4     | AREG           | A_23_P259071   | -5.1631 | 3.45E-06   | 5.4616     | 0.0036082 | NM_001657    | 374          |
| 5     | USP9Y          | A_33_P3217700  | -5.1202 | 4.03E-06   | 5.3946     | 0.0036082 | NM_004654    | 8287         |
| 6     | XIST           | A_19_P00331623 | 5.0487  | 5.21E-06   | 5.2836     | 0.0036082 | NR_001564    | NA           |
| 7     | XIST           | A_19_P00319151 | 5.0131  | 5.91E-06   | 5.2283     | 0.0036082 | NR_001564    | NA           |
| 8     | RPS4Y1         | A_23_P259314   | -4.9731 | 6.81E-06   | 5.1665     | 0.0036082 | NM_001008    | 6192         |
| 9     | XIST           | A_21_P0006538  | 4.9464  | 7.49E-06   | 5.1253     | 0.0036082 | NR_001564    | NA           |
| 10    | NCRNA00185     | A_23_P73848    | -4.9306 | 7.93E-06   | 5.1009     | 0.0036082 | NR_001544    | 55410        |
| 11    | RPS4Y2         | A_23_P324384   | -4.9043 | 8.70E-06   | 5.0605     | 0.0036082 | NM_001039567 | 140032       |
| 12    | TTY15          | A_24_P348861   | -4.8858 | 9.29E-06   | 5.0321     | 0.0036082 | NR_001545    | 64595        |
| 13    | XIST           | A_19_P00329511 | 4.8829  | 9.38E-06   | 5.0276     | 0.0036082 | NR_001564    | NA           |
| 14    | DDX3Y          | A_33_P3224331  | -4.8095 | 1.22E-05   | 4.9152     | 0.0040214 | NM_001122665 | 8653         |
| 15    | XLOC_008323    | A_21_P0006606  | -4.773  | 1.38E-05   | 4.8596     | 0.0040214 |              | NA           |
| 16    | LOC100509121   | A_21_P0013996  | -4.7713 | 1.39E-05   | 4.8569     | 0.0040214 | XM_003120334 | NA           |
| 17    | XIST           | A_33_P3341686  | 4.7621  | 1.44E-05   | 4.8429     | 0.0040214 | NR_001564    | 7503         |
| 18    | KDM5D          | A_23_P137238   | -4.7477 | 1.51E-05   | 4.821      | 0.0040214 | NM_004653    | 8284         |
| 19    | XIST           | A_19_P00802872 | 4.7442  | 1.53E-05   | 4.8158     | 0.0040214 | NR_001564    | NA           |
| 20    | TXLNG2P        | A_23_P364792   | -4.7119 | 1.71E-05   | 4.7666     | 0.0042641 | NR_045129    | 246126       |
| 21    | EIF1AY         | A_24_P237511   | -4.6872 | 1.87E-05   | 4.7293     | 0.0042641 | NM_004681    | 9086         |
| 22    | UTY            | A_23_P329835   | -4.6855 | 1.88E-05   | 4.7266     | 0.0042641 | NM_007125    | 7404         |
| 23    | TXLNG2P        | A_33_P3260223  | -4.6577 | 2.07E-05   | 4.6846     | 0.0043229 | NR_045128    | 246126       |
| 24    | P2RY2          | A_23_P24903    | -4.6566 | 2.08E-05   | 4.6829     | 0.0043229 | NM_176072    | 5029         |
| 25    | CXCR4          | A_23_P102000   | -4.6397 | 2.20E-05   | 4.6574     | 0.0044012 | NM_001008540 | 7852         |
| 26    | PRKY           | A_23_P137248   | -4.5824 | 2.68E-05   | 4.5712     | 0.0051609 | NR_028062    | 5616         |
| 27    | EIF1AY         | A_23_P148629   | -4.5437 | 3.07E-05   | 4.5131     | 0.0056809 | NM_004681    | 9086         |
| 28    | LOC100506003   | A_21_P0014436  | -4.4724 | 3.92E-05   | 4.4068     | 0.0069979 | XR_109785    | NA           |
| 29    | EGR3           | A_23_P216225   | -4.3969 | 5.07E-05   | 4.2948     | 0.0087436 | NM_004430    | 1960         |
| 30    | AREG           | A_33_P3419190  | -4.3269 | 6.43E-05   | 4.1916     | 0.010719  | NM_001657    | 374          |
| 31    | ZFY            | A_24_P942743   | -4.3165 | 6.66E-05   | 4.1763     | 0.010745  | NM_003411    | 7544         |
| 32    | XLOC_I2_015892 | A_21_P0013879  | -4.2994 | 7.06E-05   | 4.1513     | 0.011027  |              | NA           |
| 33    | CACNG6         | A_23_P501933   | -4.2787 | 7.57E-05   | 4.121      | 0.011465  | NM_145814    | 59285        |
| 34    | DUSP2          | A_24_P37409    | -4.248  | 8.39E-05   | 4.0763     | 0.012334  | NM_004418    | 1844         |
| 35    | XLOC_008276    | A_21_P0006590  | -4.2391 | 8.64E-05   | 4.0633     | 0.012346  |              | NA           |
| 36    | TXLNG2P        | A_23_P96658    | -4.2193 | 9.24E-05   | 4.0345     | 0.012826  | NR_045128    | 246126       |
| 37    | FGFR2          | A_23_P202334   | -4.1701 | 0.00010885 | 3.9632     | 0.014707  | NM_022970    | 2263         |
| 38    | UTY            | A_33_P3228977  | -4.1463 | 0.00011783 | 3.9288     | 0.0155    | BC012581     | 7404         |
| 39    | SPNS3          | A_23_P100963   | -4.126  | 0.000126   | 3.8996     | 0.015873  | NM_182538    | 201305       |
| 40    | DDX3Y          | A_24_P130936   | -4.1237 | 0.00012701 | 3.8962     | 0.015873  | NM_004660    | 8653         |
| 41    | CCL23          | A_24_P133905   | -4.0843 | 0.00014465 | 3.8397     | 0.017636  | NM_005064    | 6368         |
| 42    | TTY15          | A_21_P0006594  | -4.0492 | 0.00016237 | 3.7895     | 0.019259  | NR_001545    | NA           |
| 43    | XLOC_008276    | A_21_P0006589  | -4.0387 | 0.0001681  | 3.7744     | 0.019259  |              | NA           |
| 44    | XLOC_011047    | A_21_P0008446  | -4.0299 | 0.00017299 | 3.762      | 0.019259  |              | NA           |
| 45    | PRSS41         | A_33_P3416634  | -4.0239 | 0.00017645 | 3.7534     | 0.019259  | NM_001135086 | 360226       |

|    |                |               |         |            |        |          |              |    |           |
|----|----------------|---------------|---------|------------|--------|----------|--------------|----|-----------|
| 46 | XLOC_008185    | A_21_P0006456 | 4.0225  | 0.00017722 | 3.7515 | 0.019259 |              | NA |           |
| 47 | BACE2          | A_23_P154875  | -3.987  | 0.00019907 | 3.701  | 0.021173 | NM_012105    |    | 25825     |
| 48 | PMAIP1         | A_33_P3619171 | -3.9508 | 0.00022394 | 3.6499 | 0.023322 | NM_021127    |    | 5366      |
| 49 | PER1           | A_23_P89589   | -3.9417 | 0.0002307  | 3.6369 | 0.023536 | NM_002616    |    | 5187      |
| 50 | CLDN5          | A_33_P3285540 | 3.8881  | 0.00027437 | 3.5617 | 0.027431 | NM_001130861 |    | 7122      |
| 51 | SLC29A1        | A_23_P133694  | -3.8553 | 0.00030495 | 3.5158 | 0.029891 | NM_001078177 |    | 2030      |
| 52 | PRSS33         | A_24_P327084  | -3.8393 | 0.00032107 | 3.4934 | 0.030331 | NM_152891    |    | 260429    |
| 53 | FOSB           | A_23_P429998  | -3.8388 | 0.00032157 | 3.4927 | 0.030331 | NM_006732    |    | 2354      |
| 54 | DDIT4          | A_23_P104318  | -3.816  | 0.00034584 | 3.4611 | 0.032016 | NM_019058    |    | 54541     |
| 55 |                | A_33_P3387016 | 3.8009  | 0.000363   | 3.4401 | 0.032994 |              | NA |           |
| 56 | CCL4           | A_23_P207564  | -3.7823 | 0.00038512 | 3.4144 | 0.033909 | NM_002984    |    | 6351      |
| 57 | CCL4           | A_33_P3354607 | -3.7748 | 0.00039449 | 3.404  | 0.033909 | NM_002984    |    | 6351      |
| 58 | XLOC_005505    | A_21_P0004605 | -3.7712 | 0.00039902 | 3.399  | 0.033909 | CR607309     | NA |           |
| 59 | CD69           | A_23_P87879   | -3.7702 | 0.00040021 | 3.3977 | 0.033909 | NM_001781    |    | 969       |
| 60 | XLOC_008276    | A_21_P0006588 | -3.7114 | 0.00048216 | 3.3168 | 0.03959  |              | NA |           |
| 61 | GPR34          | A_23_P11201   | -3.7108 | 0.0004831  | 3.316  | 0.03959  | NM_001097579 |    | 2857      |
| 62 | IL5RA          | A_33_P3328254 | -3.6832 | 0.000527   | 3.2782 | 0.042227 | NM_175725    |    | 3568      |
| 63 | ALOX15         | A_23_P55373   | -3.6738 | 0.00054269 | 3.2655 | 0.042227 | NM_001140    |    | 246       |
| 64 | SMPD3          | A_23_P163567  | -3.671  | 0.00054757 | 3.2616 | 0.042227 | NM_018667    |    | 55512     |
| 65 | RAB44          | A_33_P3424328 | -3.6664 | 0.00055548 | 3.2553 | 0.042227 | XM_003403441 |    | 401258    |
| 66 | XLOC_012642    | A_21_P0009466 | -3.6643 | 0.0005592  | 3.2524 | 0.042227 | DB516369     | NA |           |
| 67 | NR4A2          | A_33_P3299066 | -3.6604 | 0.00056595 | 3.2472 | 0.042227 | NM_006186    |    | 4929      |
| 68 | CLC            | A_23_P101683  | -3.6439 | 0.00059609 | 3.2247 | 0.043821 | NM_001828    |    | 1178      |
| 69 | RAB44          | A_21_P0013023 | -3.5765 | 0.00073518 | 3.1336 | 0.053263 | AK125083     | NA |           |
| 70 | MGLL           | A_33_P3281795 | 3.5697  | 0.00075084 | 3.1245 | 0.053621 | NM_007283    |    | 11343     |
| 71 | DISC1          | A_21_P0000052 | 3.5613  | 0.00077058 | 3.1132 | 0.054255 | NM_001164554 | NA |           |
| 72 | PTGDR2         | A_24_P115932  | -3.5479 | 0.00080313 | 3.0952 | 0.055762 | NM_004778    |    | 11251     |
| 73 | SIGLEC8        | A_24_P40001   | -3.5272 | 0.00085583 | 3.0676 | 0.058607 | NM_014442    |    | 27181     |
| 74 | EPN2           | A_23_P89310   | -3.5079 | 0.00090826 | 3.0418 | 0.060734 | NM_014964    |    | 22905     |
| 75 | ANXA3          | A_23_P121716  | 3.5068  | 0.00091119 | 3.0404 | 0.060734 | NM_005139    |    | 306       |
| 76 | CCR3           | A_23_P250302  | -3.4854 | 0.00097284 | 3.012  | 0.06399  | NM_001837    |    | 1232      |
| 77 | VSTM1          | A_33_P3514487 | -3.4595 | 0.0010527  | 2.9777 | 0.068343 | NM_198481    |    | 284415    |
| 78 | TSIX           | A_33_P3405911 | 3.4274  | 0.0011608  | 2.9353 | 0.073044 | NR_003255    |    | 9383      |
| 79 | RAB44          | A_33_P3349912 | -3.4263 | 0.0011644  | 2.9339 | 0.073044 | AK125083     |    | 401258    |
| 80 | TMEM164        | A_23_P96041   | -3.425  | 0.0011689  | 2.9322 | 0.073044 | NM_032227    |    | 84187     |
| 81 | UTY            | A_23_P160004  | -3.4149 | 0.0012054  | 2.9189 | 0.073228 | NM_182660    |    | 7404      |
| 82 | LOC100652883   | A_21_P0014014 | -3.4141 | 0.0012082  | 2.9179 | 0.073228 | XM_003403469 | NA |           |
| 83 | LTC4S          | A_24_P397294  | -3.412  | 0.0012158  | 2.9151 | 0.073228 | NM_145867    |    | 4056      |
| 84 |                | A_33_P3343394 | 3.3874  | 0.0013098  | 2.8828 | 0.076784 |              | NA |           |
| 85 | SAG            | A_23_P5853    | -3.3865 | 0.0013133  | 2.8816 | 0.076784 | NM_000541    |    | 6295      |
| 86 | SNAR-D         | A_21_P0000508 | 3.3845  | 0.0013209  | 2.8791 | 0.076784 | NR_024243    | NA |           |
| 87 | CMTM5          | A_23_P106042  | 3.3689  | 0.0013846  | 2.8587 | 0.079065 | NM_001037288 |    | 116173    |
| 88 | XLOC_I2_014694 | A_21_P0013548 | -3.3672 | 0.0013918  | 2.8564 | 0.079065 |              | NA |           |
| 89 | CNR2           | A_23_P310931  | -3.3434 | 0.0014943  | 2.8256 | 0.083933 | NM_001841    |    | 1269      |
| 90 | PNMA6C         | A_33_P3233436 | -3.3349 | 0.0015328  | 2.8145 | 0.085139 | NM_001170944 |    | 100287428 |
| 91 |                | A_33_P3226546 | -3.3267 | 0.0015707  | 2.8039 | 0.085408 |              | NA |           |
| 92 | ITGA2B         | A_24_P65373   | 3.3265  | 0.0015718  | 2.8036 | 0.085408 | NM_000419    |    | 3674      |



|     |                |                |         |           |        |          |              |        |
|-----|----------------|----------------|---------|-----------|--------|----------|--------------|--------|
| 93  | F13A1          | A_33_P3416097  | 3.3086  | 0.001658  | 2.7804 | 0.089123 | NM_000129    | 2162   |
| 94  | PMP22          | A_23_P100711   | -3.2996 | 0.0017028 | 2.7688 | 0.090394 | NM_000304    | 5376   |
| 95  | EMR4P          | A_33_P3247320  | -3.2966 | 0.0017178 | 2.765  | 0.090394 | NR_024075    | 326342 |
| 96  | TREML1         | A_33_P3381777  | 3.2864  | 0.0017708 | 2.7518 | 0.091425 | NM_178174    | 340205 |
| 97  | TFF3           | A_33_P3334305  | -3.2858 | 0.001774  | 2.751  | 0.091425 | NM_003226    | 7033   |
| 98  | ALAS2          | A_32_P385587   | 3.2732  | 0.0018414 | 2.7348 | 0.092074 | NM_000032    | 212    |
| 99  | ITGB3          | A_24_P318656   | 3.2724  | 0.0018454 | 2.7339 | 0.092074 | NM_000212    | 3690   |
| 100 | IL3RA          | A_32_P217750   | -3.27   | 0.0018589 | 2.7307 | 0.092074 | NM_002183    | 3563   |
| 101 | THBS4          | A_24_P260443   | -3.2697 | 0.0018603 | 2.7304 | 0.092074 | NM_003248    | 7060   |
| 102 | SNAR-B2        | A_21_P0000507  | 3.2587  | 0.0019216 | 2.7163 | 0.093372 | NR_024230    | NA     |
| 103 | RNF208         | A_33_P3244274  | 3.2583  | 0.0019239 | 2.7158 | 0.093372 | BC016958     | 727800 |
| 104 | ACACB          | A_33_P3334220  | -3.2479 | 0.0019839 | 2.7025 | 0.095362 | NM_001093    | 32     |
| 105 | PDE5A          | A_33_P3378514  | 3.2378  | 0.0020436 | 2.6896 | 0.097293 | NM_001083    | 8654   |
| 106 | KCNJ15         | A_33_P3376140  | 3.2264  | 0.0021134 | 2.675  | 0.099667 | NM_170736    | 3772   |
| 107 | MFS6L          | A_33_P3393331  | -3.2172 | 0.0021708 | 2.6634 | 0.10142  | NM_152599    | 162387 |
| 108 | LOC389906      | A_33_P3325229  | 3.2103  | 0.0022155 | 2.6545 | 0.10255  | NR_034031    | 389906 |
| 109 | TRIB1          | A_24_P252497   | -3.2071 | 0.0022361 | 2.6505 | 0.10255  | NM_025195    | 10221  |
| 110 | F13A1          | A_32_P140139   | 3.2036  | 0.0022588 | 2.6461 | 0.10265  | NM_000129    | 2162   |
| 111 | EMR1           | A_33_P3215803  | -3.1919 | 0.0023373 | 2.6313 | 0.10446  | NM_001974    | 2015   |
| 112 | PPBP           | A_23_P121596   | 3.1914  | 0.002341  | 2.6306 | 0.10446  | NM_002704    | 5473   |
| 113 | IL8            | A_32_P87013    | -3.1864 | 0.002375  | 2.6243 | 0.10446  | NM_000584    | 3576   |
| 114 | C6orf25        | A_32_P168349   | 3.1854  | 0.0023821 | 2.623  | 0.10446  | NM_138277    | 80739  |
| 115 | EHD3           | A_23_P79251    | 3.1754  | 0.0024526 | 2.6104 | 0.10661  | NM_014600    | 30845  |
| 116 | XLOC_008015    | A_19_P00326248 | 3.1682  | 0.002504  | 2.6014 | 0.10791  |              | NA     |
| 117 |                | A_33_P3346333  | -3.1512 | 0.0026307 | 2.5799 | 0.1124   |              | NA     |
| 118 | LEFTY1         | A_23_P160336   | 3.1414  | 0.0027064 | 2.5676 | 0.11466  | NM_020997    | 10637  |
| 119 | GUCY1A3        | A_23_P69573    | 3.1355  | 0.0027533 | 2.5601 | 0.11566  | NM_000856    | 2982   |
| 120 | CCL2           | A_23_P89431    | -3.1273 | 0.0028187 | 2.5499 | 0.11647  | NM_002982    | 6347   |
| 121 |                | A_33_P3349761  | 3.1273  | 0.0028191 | 2.5499 | 0.11647  |              | NA     |
| 122 |                | A_33_P3214516  | -3.1062 | 0.0029952 | 2.5236 | 0.12273  | M21784       | NA     |
| 123 | ZNRF3          | A_24_P162373   | -3.0933 | 0.0031086 | 2.5074 | 0.12634  | NM_001206998 | 84133  |
| 124 | NEFL           | A_33_P3287785  | 3.0773  | 0.0032537 | 2.4876 | 0.13117  | NM_006158    | 4747   |
| 125 | NR4A3          | A_23_P398566   | -3.0723 | 0.0033003 | 2.4814 | 0.13199  | NM_173200    | 8013   |
| 126 | CD69           | A_33_P3241021  | -3.0648 | 0.0033717 | 2.4721 | 0.13377  | AK303383     | 969    |
| 127 | SCGB1C1        | A_23_P27207    | 3.0555  | 0.0034627 | 2.4606 | 0.13596  | NM_145651    | 147199 |
| 128 | SLC16A14       | A_24_P342829   | -3.0536 | 0.0034812 | 2.4583 | 0.13596  | NM_152527    | 151473 |
| 129 | ABTB2          | A_23_P356616   | -3.0495 | 0.0035214 | 2.4533 | 0.13646  | NM_145804    | 25841  |
| 130 | SORD           | A_33_P3413483  | -3.0376 | 0.0036428 | 2.4386 | 0.13988  | AK090738     | 6652   |
| 131 | XLOC_I2_007424 | A_21_P0011814  | 3.0349  | 0.0036712 | 2.4352 | 0.13988  | CB178477     | NA     |
| 132 | ADORA3         | A_23_P137931   | -3.0327 | 0.0036936 | 2.4326 | 0.13988  | NM_000677    | 140    |
| 133 | SH2D2A         | A_21_P0000028  | -3.0293 | 0.003729  | 2.4284 | 0.14016  | NM_001161444 | NA     |
| 134 | VWF            | A_23_P105562   | 3.0132  | 0.0039032 | 2.4086 | 0.14561  | NM_000552    | 7450   |
| 135 | XLOC_008221    | A_21_P0006461  | -2.9927 | 0.0041346 | 2.3836 | 0.15257  | BX331476     | NA     |
| 136 |                | A_33_P3304748  | 2.9873  | 0.004198  | 2.377  | 0.15257  |              | NA     |
| 137 |                | A_33_P3212704  | 2.9865  | 0.0042076 | 2.376  | 0.15257  |              | NA     |
| 138 | SERPINA1       | A_33_P3289659  | -2.9862 | 0.0042119 | 2.3755 | 0.15257  | BX248257     | 5265   |
| 139 | TSIX           | A_19_P00316565 | 2.98    | 0.0042851 | 2.368  | 0.15307  | NR_003255    | NA     |

|     |                |                |         |           |        |         |              |           |
|-----|----------------|----------------|---------|-----------|--------|---------|--------------|-----------|
| 140 | NR4A2          | A_23_P131208   | -2.9756 | 0.0043385 | 2.3627 | 0.15307 | NM_006186    | 4929      |
| 141 | CTDSPL         | A_24_P251534   | 2.9755  | 0.0043397 | 2.3625 | 0.15307 | NM_001008392 | 10217     |
| 142 | RNF208         | A_33_P3231670  | 2.9748  | 0.0043481 | 2.3617 | 0.15307 | NM_031297    | 727800    |
| 143 | CLU            | A_23_P215913   | 2.9637  | 0.0044849 | 2.3482 | 0.15634 | NM_001831    | 1191      |
| 144 | CYP4F12        | A_23_P108280   | -2.9623 | 0.0045034 | 2.3465 | 0.15634 | NM_023944    | 66002     |
| 145 | C15orf26       | A_23_P336612   | 2.9537  | 0.0046118 | 2.3361 | 0.159   | NM_173528    | 161502    |
| 146 | SIGLEC10       | A_23_P208182   | -2.9202 | 0.0050632 | 2.2956 | 0.17336 | NM_033130    | 89790     |
| 147 | LOC100506342   | A_33_P3514859  | -2.9009 | 0.0053402 | 2.2724 | 0.18024 | XR_108862    | 100506342 |
| 148 | SPTB           | A_32_P134968   | 2.8985  | 0.0053757 | 2.2696 | 0.18024 | NM_001024858 | 6710      |
| 149 | SELP           | A_23_P137697   | 2.8975  | 0.0053902 | 2.2684 | 0.18024 | NM_003005    | 6403      |
| 150 | IFIT1B         | A_33_P3395532  | 2.8963  | 0.0054083 | 2.2669 | 0.18024 | NM_001010987 | 439996    |
| 151 | PDE2A          | A_23_P401106   | 2.8841  | 0.0055932 | 2.2523 | 0.18517 | NM_002599    | 5138      |
| 152 |                | A_33_P3399755  | 2.8758  | 0.0057232 | 2.2424 | 0.18823 |              | NA        |
| 153 | ACOT11         | A_23_P417415   | -2.8689 | 0.0058319 | 2.2342 | 0.19055 | NM_147161    | 26027     |
| 154 | LOC645638      | A_21_P0009342  | -2.8615 | 0.0059519 | 2.2253 | 0.19224 | NR_030732    | NA        |
| 155 | RAB2B          | A_33_P3295803  | 2.861   | 0.0059607 | 2.2247 | 0.19224 | NM_032846    | 84932     |
| 156 | FSTL1          | A_23_P212696   | 2.8527  | 0.0060966 | 2.2149 | 0.19537 | NM_007085    | 11167     |
| 157 | PRKAR2B        | A_23_P42975    | 2.8501  | 0.0061411 | 2.2118 | 0.19554 | NM_002736    | 5577      |
| 158 | C3AR1          | A_23_P2431     | -2.8451 | 0.0062241 | 2.2059 | 0.19693 | NM_004054    | 719       |
| 159 | LINC00266-1    | A_23_P355776   | 2.8412  | 0.0062913 | 2.2013 | 0.1978  | NR_040415    | 140849    |
| 160 | LOC728975      | A_33_P3337019  | 2.8046  | 0.0069493 | 2.1581 | 0.21695 | XR_110914    | 728975    |
| 161 | PROS1          | A_23_P73114    | 2.8017  | 0.0070048 | 2.1546 | 0.21695 | NM_000313    | 5627      |
| 162 | DDX43          | A_23_P156445   | -2.8003 | 0.0070306 | 2.153  | 0.21695 | NM_018665    | 55510     |
| 163 | P2RY14         | A_24_P165864   | -2.7936 | 0.0071601 | 2.1451 | 0.21939 | NM_014879    | 9934      |
| 164 | XLOC_013612    | A_21_P0009991  | 2.7916  | 0.0071974 | 2.1428 | 0.21939 |              | NA        |
| 165 | LOC100506924   | A_19_P00315587 | 2.7867  | 0.0072934 | 2.1371 | 0.22097 | XR_110015    | NA        |
| 166 | LOC100507540   | A_21_P0013589  | -2.7777 | 0.0074737 | 2.1265 | 0.22507 | XR_108989    | NA        |
| 167 | RHOBTB1        | A_33_P3348288  | 2.7627  | 0.0077809 | 2.109  | 0.23091 | NM_001242359 | 9886      |
| 168 |                | A_33_P3422712  | 2.7572  | 0.0078965 | 2.1026 | 0.23091 |              | NA        |
| 169 | PAQR9          | A_32_P196193   | 2.7565  | 0.0079106 | 2.1018 | 0.23091 | NM_198504    | 344838    |
| 170 | TNFRSF12A      | A_23_P49338    | -2.7557 | 0.0079268 | 2.1009 | 0.23091 | NM_016639    | 51330     |
| 171 | TMEM158        | A_23_P369899   | 2.7552  | 0.0079387 | 2.1003 | 0.23091 | NM_015444    | 25907     |
| 172 |                | A_33_P3396326  | 2.7534  | 0.0079771 | 2.0982 | 0.23091 |              | NA        |
| 173 | FLJ39051       | A_21_P0000607  | 2.7527  | 0.007991  | 2.0974 | 0.23091 | NR_033839    | NA        |
| 174 | CEBPE          | A_33_P3387991  | -2.7473 | 0.0081071 | 2.0911 | 0.23218 | NM_001805    | 1053      |
| 175 | XLOC_009445    | A_21_P0007354  | 2.7464  | 0.008128  | 2.09   | 0.23218 | AK124475     | NA        |
| 176 | XLOC_I2_004866 | A_21_P0011363  | -2.7411 | 0.0082431 | 2.0839 | 0.23413 | BC070492     | NA        |
| 177 | LOC100652951   | A_21_P0014898  | -2.7364 | 0.008348  | 2.0784 | 0.23577 | XR_132888    | NA        |
| 178 | GP1BB          | A_33_P3265030  | 2.7302  | 0.0084873 | 2.0712 | 0.23836 | NM_000407    | 2812      |
| 179 | ATP8B3         | A_23_P79108    | -2.7151 | 0.0088348 | 2.0538 | 0.24601 | NM_138813    | 148229    |
| 180 | CTTN           | A_33_P3310780  | 2.7111  | 0.0089294 | 2.0492 | 0.24601 | NM_005231    | 2017      |
| 181 | XLOC_014105    | A_19_P00813140 | 2.7089  | 0.0089825 | 2.0466 | 0.24601 | BX648824     | NA        |
| 182 | ELOVL7         | A_23_P359277   | 2.7087  | 0.0089854 | 2.0465 | 0.24601 | NM_024930    | 79993     |
| 183 | KREMEN1        | A_23_P68851    | 2.7079  | 0.0090059 | 2.0455 | 0.24601 | NM_001039570 | 83999     |
| 184 | SOCS3          | A_23_P207058   | 2.705   | 0.0090748 | 2.0422 | 0.24641 | NM_003955    | 9021      |
| 185 | XLOC_I2_001085 | A_21_P0010646  | -2.7018 | 0.0091511 | 2.0385 | 0.24641 | AK090412     | NA        |
| 186 | GP6            | A_33_P3461416  | 2.6994  | 0.0092098 | 2.0358 | 0.24641 | NM_001083899 | 51206     |

|     |                |                |         |           |        |         |              |           |
|-----|----------------|----------------|---------|-----------|--------|---------|--------------|-----------|
| 187 | CCT3           | A_33_P3396831  | 2.6991  | 0.0092176 | 2.0354 | 0.24641 |              | 7203      |
| 188 | WWC1           | A_23_P81392    | 2.6948  | 0.0093226 | 2.0305 | 0.24789 | NM_015238    | 23286     |
| 189 | MRV11-AS1      | A_23_P396299   | 2.6853  | 0.0095591 | 2.0196 | 0.25284 | NR_034094    | 100129827 |
| 190 | LRRD1          | A_33_P3420446  | 2.677   | 0.009771  | 2.0101 | 0.25708 | NM_001161528 | 401387    |
| 191 | XLOC_009790    | A_21_P0007574  | 2.6687  | 0.009987  | 2.0006 | 0.26139 |              | NA        |
| 192 | LOC388948      | A_19_P00321953 | 2.6632  | 0.010132  | 1.9943 | 0.26381 | NR_034099    | NA        |
| 193 | NEURL          | A_33_P3293524  | 2.6576  | 0.010284  | 1.9878 | 0.2652  | NM_004210    | 9148      |
| 194 | XLOC_007911    | A_21_P0006410  | 2.6573  | 0.010292  | 1.9875 | 0.2652  |              | NA        |
| 195 | TMCC2          | A_32_P133840   | 2.6426  | 0.010696  | 1.9708 | 0.27419 | NM_014858    | 9911      |
| 196 | SUV420H2       | A_33_P3359473  | -2.6257 | 0.011176  | 1.9517 | 0.28373 | NM_032701    | 84787     |
| 197 | AQP10          | A_23_P126613   | 2.6255  | 0.011181  | 1.9515 | 0.28373 | NM_080429    | 89872     |
| 198 | XLOC_007052    | A_19_P00316401 | 2.6136  | 0.011533  | 1.938  | 0.29119 | BX500531     | NA        |
| 199 | XLOC_I2_000423 | A_21_P0010727  | 2.6016  | 0.011897  | 1.9246 | 0.29886 | AK311502     | NA        |
| 200 | TGFB111        | A_33_P3236858  | 2.5982  | 0.012004  | 1.9207 | 0.30004 | NM_001042454 | 7041      |
| 201 | TSIX           | A_19_P00321917 | 2.5926  | 0.012179  | 1.9144 | 0.3029  | NR_003255    | NA        |
| 202 | PRSS36         | A_24_P412734   | 2.5895  | 0.012275  | 1.911  | 0.30378 | NM_173502    | 146547    |
| 203 | XLOC_I2_008595 | A_21_P0012113  | 2.5793  | 0.012605  | 1.8995 | 0.30762 |              | NA        |
| 204 | XLOC_009389    | A_21_P0007325  | 2.579   | 0.012613  | 1.8992 | 0.30762 |              | NA        |
| 205 | XLOC_009548    | A_21_P0007397  | 2.5781  | 0.012641  | 1.8982 | 0.30762 |              | NA        |
| 206 |                | A_33_P3407157  | 2.5771  | 0.012676  | 1.897  | 0.30762 | DB050195     | NA        |
| 207 | XLOC_I2_012836 | A_21_P0013052  | 2.5673  | 0.012998  | 1.8861 | 0.31338 |              | NA        |
| 208 | COL20A1        | A_33_P3395952  | 2.5661  | 0.013039  | 1.8847 | 0.31338 | NM_020882    | 57642     |
| 209 | GPR87          | A_23_P121120   | 2.5615  | 0.013194  | 1.8796 | 0.31559 | NM_023915    | 53836     |
| 210 | XLOC_000379    | A_21_P0001011  | 2.5575  | 0.013329  | 1.8752 | 0.31728 |              | NA        |
| 211 | TNXB           | A_23_P156708   | 2.5523  | 0.013509  | 1.8694 | 0.32006 | NM_032470    | 7148      |
| 212 | XLOC_013573    | A_21_P0009860  | 2.5484  | 0.013646  | 1.865  | 0.32177 | BC041864     | NA        |
| 213 | LY6G6F         | A_33_P3214334  | 2.5456  | 0.013744  | 1.8619 | 0.32183 | NM_001003693 | 259215    |
| 214 | PDK2           | A_21_P0000146  | -2.5446 | 0.013777  | 1.8608 | 0.32183 | NM_001199900 | NA        |
| 215 | LINC00442      | A_21_P0008228  | 2.5362  | 0.014074  | 1.8516 | 0.32705 | NR_026852    | NA        |
| 216 | C20orf108      | A_33_P3306352  | 2.5343  | 0.014146  | 1.8494 | 0.32705 |              | 116151    |
| 217 | UBE2O          | A_24_P172993   | 2.5328  | 0.014197  | 1.8478 | 0.32705 | NM_022066    | 63893     |
| 218 | SELP           | A_33_P3339100  | 2.5308  | 0.014272  | 1.8455 | 0.32727 | NM_003005    | 6403      |
| 219 | XLOC_007219    | A_21_P0005631  | 2.5274  | 0.014395  | 1.8418 | 0.32858 | BC014119     | NA        |
| 220 | GYPB           | A_23_P212854   | 2.5234  | 0.014542  | 1.8374 | 0.32931 | NM_002100    | 2994      |
| 221 | UGT2B7         | A_23_P136671   | -2.5215 | 0.014614  | 1.8352 | 0.32931 | NM_001074    | 7364      |
| 222 | IGFBP2         | A_23_P119943   | 2.5212  | 0.014624  | 1.8349 | 0.32931 | NM_000597    | 3485      |
| 223 | GP9            | A_33_P3383226  | 2.5077  | 0.015132  | 1.8201 | 0.33861 | NM_000174    | 2815      |
| 224 | XLOC_008079    | A_19_P00320275 | 2.5057  | 0.015211  | 1.8179 | 0.33861 |              | NA        |
| 225 | XLOC_I2_015441 | A_21_P0013752  | 2.5038  | 0.015281  | 1.8158 | 0.33861 |              | NA        |
| 226 | XLOC_011940    | A_21_P0009122  | 2.5032  | 0.015308  | 1.8151 | 0.33861 |              | NA        |
| 227 | CXCR6          | A_23_P109913   | -2.5009 | 0.015397  | 1.8126 | 0.33887 | NM_006564    | 10663     |
| 228 | LOC389906      | A_32_P40377    | 2.4994  | 0.015456  | 1.8109 | 0.33887 | NR_034031    | 389906    |
| 229 | MYL9           | A_23_P210425   | 2.4921  | 0.01574   | 1.803  | 0.34231 | NM_181526    | 10398     |
| 230 | SORD           | A_23_P77103    | -2.4919 | 0.015749  | 1.8027 | 0.34231 | NM_003104    | 6652      |
| 231 | ZNF880         | A_24_P926783   | -2.4877 | 0.015916  | 1.7982 | 0.34433 | NM_001145434 | 400713    |
| 232 | GNAZ           | A_23_P416581   | 2.4829  | 0.016113  | 1.7928 | 0.34433 | NM_002073    | 2781      |
| 233 | USP9Y          | A_33_P3725324  | -2.4798 | 0.016237  | 1.7895 | 0.34433 | NM_004654    | 8287      |

|     |                |               |         |          |        |         |              |           |
|-----|----------------|---------------|---------|----------|--------|---------|--------------|-----------|
| 234 | TTC25          | A_23_P73150   | 2.4792  | 0.016261 | 1.7888 | 0.34433 | NM_031421    | 83538     |
| 235 | PRSS33         | A_33_P3312779 | -2.4791 | 0.016267 | 1.7887 | 0.34433 | NM_152891    | 260429    |
| 236 | IDO1           | A_23_P112026  | -2.479  | 0.016269 | 1.7886 | 0.34433 | NM_002164    | 3620      |
| 237 | XLOC_011807    | A_21_P0008983 | 2.4777  | 0.016324 | 1.7872 | 0.34433 | NA           |           |
| 238 | HTR1B          | A_23_P156824  | 2.4749  | 0.016438 | 1.7841 | 0.34528 | NM_000863    | 3351      |
| 239 | MMRN1          | A_33_P3212257 | 2.4723  | 0.016544 | 1.7814 | 0.34605 | NM_007351    | 22915     |
| 240 | XLOC_001459    | A_21_P0002210 | 2.4677  | 0.016736 | 1.7763 | 0.3486  | NA           |           |
| 241 | CD248          | A_33_P3337485 | -2.4616 | 0.016994 | 1.7697 | 0.35251 | NM_020404    | 57124     |
| 242 | SPRYD5         | A_23_P150483  | -2.457  | 0.017193 | 1.7646 | 0.35515 | NM_032681    | 84767     |
| 243 | S100A12        | A_33_P3385785 | 2.4528  | 0.017374 | 1.7601 | 0.35742 | NM_005621    | 6283      |
| 244 | XLOC_014251    | A_21_P0010362 | 2.4503  | 0.017484 | 1.7574 | 0.35821 | NA           |           |
| 245 | C19orf59       | A_23_P330561  | 2.4437  | 0.017772 | 1.7503 | 0.36263 | NM_174918    | 199675    |
| 246 | S100A12        | A_23_P74001   | 2.4367  | 0.018087 | 1.7426 | 0.36754 | NM_005621    | 6283      |
| 247 | PRKAR2B        | A_33_P3304983 | 2.4331  | 0.018248 | 1.7388 | 0.36923 | NM_002736    | 5577      |
| 248 | DMRTC1         | A_32_P179998  | -2.4316 | 0.018317 | 1.7371 | 0.36923 | NM_033053    | 63947     |
| 249 | LINC00230A     | A_33_P3308232 | -2.4295 | 0.018413 | 1.7349 | 0.36966 | NR_002161    | 401630    |
| 250 | PVRL1          | A_23_P76034   | 2.4212  | 0.018797 | 1.7259 | 0.3735  | NM_203286    | 5818      |
| 251 | ABCC3          | A_23_P207507  | 2.4208  | 0.018814 | 1.7255 | 0.3735  | NM_003786    | 8714      |
| 252 | XLOC_I2_014423 | A_21_P0013507 | -2.4202 | 0.018844 | 1.7248 | 0.3735  | NA           |           |
| 253 | CXCL5          | A_24_P277367  | 2.4189  | 0.018903 | 1.7235 | 0.3735  | NM_002994    | 6374      |
| 254 | CAT            | A_23_P105138  | -2.4158 | 0.019049 | 1.7201 | 0.37397 | NM_001752    | 847       |
| 255 | ITGAD          | A_23_P129665  | 2.4148  | 0.019097 | 1.719  | 0.37397 | NM_005353    | 3681      |
| 256 | SNAR-G2        | A_21_P0000509 | 2.4105  | 0.0193   | 1.7144 | 0.37397 | NR_024244    | NA        |
| 257 | XLOC_000930    | A_21_P0001158 | 2.4104  | 0.019303 | 1.7144 | 0.37397 | AK056049     | NA        |
| 258 |                | A_32_P40375   | 2.4103  | 0.019311 | 1.7142 | 0.37397 | NA           |           |
| 259 | TNXB           | A_33_P3381338 | 2.4083  | 0.019406 | 1.7121 | 0.37397 | NM_019105    | 7148      |
| 260 | LOC100129216   | A_33_P3255531 | 2.4074  | 0.01945  | 1.7111 | 0.37397 | NM_001242853 | 100129216 |
| 261 | RAB27B         | A_23_P107612  | 2.4009  | 0.019763 | 1.7042 | 0.37852 | NM_004163    | 5874      |
| 262 | XLOC_I2_006994 | A_21_P0011776 | 2.398   | 0.019905 | 1.701  | 0.37948 | BC068609     | NA        |
| 263 | ADM            | A_23_P127948  | 2.3968  | 0.019964 | 1.6997 | 0.37948 | NM_001124    | 133       |
| 264 | EGR1           | A_23_P214080  | -2.395  | 0.020055 | 1.6978 | 0.37972 | NM_001964    | 1958      |
| 265 |                | A_33_P3233404 | 2.3935  | 0.020129 | 1.6962 | 0.37972 | AB305916     | NA        |
| 266 | LINC00239      | A_32_P176911  | 2.3898  | 0.02031  | 1.6923 | 0.38168 | NR_026774    | 145200    |
| 267 | ZBTB42         | A_33_P3289128 | -2.3837 | 0.02062  | 1.6857 | 0.38556 | NM_001137601 | 100128927 |
| 268 | FHL3           | A_23_P114839  | -2.3827 | 0.02067  | 1.6847 | 0.38556 | NM_004468    | 2275      |
| 269 | SPRR2A         | A_33_P3260426 | 2.3777  | 0.020926 | 1.6793 | 0.38825 | NM_005988    | 6700      |
| 270 | GALNT14        | A_23_P67847   | 2.3759  | 0.021016 | 1.6774 | 0.38825 | NM_024572    | 79623     |
| 271 | LOC643072      | A_21_P0014102 | 2.3753  | 0.021047 | 1.6768 | 0.38825 | XR_108434    | NA        |
| 272 | LRRN3          | A_23_P31376   | -2.3686 | 0.021397 | 1.6696 | 0.39255 | NM_018334    | 54674     |
| 273 | HRASLS         | A_23_P57658   | 2.3678  | 0.021438 | 1.6688 | 0.39255 | NM_020386    | 57110     |
| 274 |                | A_33_P3387075 | 2.365   | 0.021586 | 1.6658 | 0.39382 | NA           |           |
| 275 | OLIG2          | A_23_P211079  | -2.3572 | 0.022    | 1.6576 | 0.39993 | NM_005806    | 10215     |
| 276 | PHACTR1        | A_24_P943566  | -2.3533 | 0.02221  | 1.6535 | 0.40227 | AB051520     | 221692    |
| 277 | CHRFAM7A       | A_33_P3719083 | -2.3499 | 0.022394 | 1.6499 | 0.40353 | NM_139320    | 89832     |
| 278 | XLOC_I2_015438 | A_21_P0013747 | -2.3491 | 0.022441 | 1.649  | 0.40353 | NA           |           |
| 279 | LOC100506546   | A_21_P0014063 | -2.3423 | 0.02281  | 1.6419 | 0.4087  | XR_108325    | NA        |
| 280 | TTY10          | A_23_P320622  | -2.3406 | 0.022905 | 1.6401 | 0.40894 | NR_001542    | 246119    |

|     |              |                |         |          |        |         |              |    |        |
|-----|--------------|----------------|---------|----------|--------|---------|--------------|----|--------|
| 281 | XLOC_005127  | A_19_P00316820 | 2.338   | 0.023053 | 1.6373 | 0.41011 | AK091028     | NA |        |
| 282 | LOC100506930 | A_21_P0011696  | -2.3286 | 0.023583 | 1.6274 | 0.41805 | NR_038279    | NA |        |
| 283 | RHBG         | A_23_P51690    | 2.3258  | 0.023745 | 1.6244 | 0.41943 | NM_020407    |    | 57127  |
| 284 |              | A_33_P3382887  | 2.3187  | 0.024156 | 1.617  | 0.42519 |              | NA |        |
| 285 | HCRTR1       | A_23_P74178    | 2.31    | 0.024665 | 1.6079 | 0.4299  | NM_001525    |    | 3061   |
| 286 |              | A_33_P3363305  | 2.309   | 0.024724 | 1.6069 | 0.4299  |              | NA |        |
| 287 | LOC389906    | A_21_P0013805  | 2.3082  | 0.024774 | 1.606  | 0.4299  | NR_034031    | NA |        |
| 288 | ALPL         | A_24_P353619   | 2.3054  | 0.024942 | 1.6031 | 0.4299  | NM_000478    |    | 249    |
| 289 | EGR2         | A_23_P46936    | -2.304  | 0.025026 | 1.6016 | 0.4299  | NM_000399    |    | 1959   |
| 290 | XLOC_012332  | A_21_P0009285  | 2.3034  | 0.02506  | 1.601  | 0.4299  |              | NA |        |
| 291 |              | A_33_P3334428  | 2.303   | 0.025086 | 1.6006 | 0.4299  |              | NA |        |
| 292 | XLOC_009337  | A_21_P0007301  | 2.3026  | 0.025111 | 1.6001 | 0.4299  |              | NA |        |
| 293 | WBSCR17      | A_23_P111517   | 2.2972  | 0.025439 | 1.5945 | 0.4328  | NM_022479    |    | 64409  |
| 294 |              | A_33_P3370019  | -2.2938 | 0.025647 | 1.591  | 0.4328  | AK093943     | NA |        |
| 295 | XLOC_014103  | A_19_P00808865 | -2.2928 | 0.025706 | 1.59   | 0.4328  |              | NA |        |
| 296 | PRTFDC1      | A_23_P202004   | 2.2928  | 0.025708 | 1.5899 | 0.4328  | NM_020200    |    | 56952  |
| 297 | LOC100506585 | A_21_P0000855  | -2.2926 | 0.025723 | 1.5897 | 0.4328  | NR_038966    | NA |        |
| 298 | LTBP1        | A_23_P43810    | 2.291   | 0.02582  | 1.588  | 0.4328  | NM_206943    |    | 4052   |
| 299 | TPM1         | A_24_P44462    | 2.2899  | 0.025887 | 1.5869 | 0.4328  | NM_000366    |    | 7168   |
| 300 | PNMA6A       | A_33_P3292196  | -2.2862 | 0.026121 | 1.583  | 0.43526 | NM_032882    |    | 84968  |
| 301 |              | A_33_P3244117  | 2.2845  | 0.026224 | 1.5813 | 0.43553 | AK122666     | NA |        |
| 302 | FLNA         | A_33_P3408711  | 2.2826  | 0.026341 | 1.5794 | 0.43602 | NM_001456    |    | 2316   |
| 303 | XLOC_003839  | A_21_P0003704  | 2.2788  | 0.026581 | 1.5754 | 0.43854 |              | NA |        |
| 304 | MPL          | A_24_P156769   | 2.2758  | 0.026777 | 1.5722 | 0.43917 | NM_005373    |    | 4352   |
| 305 | KREMEN1      | A_33_P3262431  | 2.2742  | 0.026877 | 1.5706 | 0.43917 | NM_032045    |    | 83999  |
| 306 | TNS1         | A_33_P3738458  | 2.2741  | 0.026883 | 1.5705 | 0.43917 | NM_022648    |    | 7145   |
| 307 | HIST1H2AC    | A_23_P372860   | 2.271   | 0.027085 | 1.5673 | 0.43959 | NM_003512    |    | 8334   |
| 308 |              | A_33_P3224882  | -2.2693 | 0.027194 | 1.5655 | 0.43959 | Z11260       | NA |        |
| 309 |              | A_33_P3364493  | 2.2647  | 0.02749  | 1.5608 | 0.43959 |              | NA |        |
| 310 |              | A_24_P267686   | 2.2632  | 0.027594 | 1.5592 | 0.43959 |              | NA |        |
| 311 | FLJ21408     | A_21_P0000676  | 2.2626  | 0.02763  | 1.5586 | 0.43959 | NR_037184    | NA |        |
| 312 | PAGE2B       | A_32_P109683   | 2.2619  | 0.027675 | 1.5579 | 0.43959 | NM_001015038 |    | 389860 |
| 313 | AOX2P        | A_19_P00322315 | 2.2608  | 0.027747 | 1.5568 | 0.43959 | NR_001557    | NA |        |
| 314 | PF4          | A_24_P79403    | 2.26    | 0.027805 | 1.5559 | 0.43959 | NM_002619    |    | 5196   |
| 315 | XLOC_010216  | A_21_P0007773  | 2.2579  | 0.027941 | 1.5538 | 0.43959 |              | NA |        |
| 316 | CDC20        | A_23_P149200   | 2.2564  | 0.02804  | 1.5522 | 0.43959 | NM_001255    |    | 991    |
| 317 | OLFM4        | A_24_P181254   | 2.2558  | 0.028083 | 1.5516 | 0.43959 | NM_006418    |    | 10562  |
| 318 | BPGM         | A_23_P70843    | 2.2552  | 0.02812  | 1.551  | 0.43959 | NM_199186    |    | 669    |
| 319 | MAFIP        | A_21_P0000766  | 2.2551  | 0.028128 | 1.5509 | 0.43959 | NM_001190825 | NA |        |
| 320 | GLP2R        | A_33_P3398406  | 2.2549  | 0.028139 | 1.5507 | 0.43959 | NM_004246    |    | 9340   |
| 321 | XLOC_013623  | A_21_P0009996  | 2.2494  | 0.028508 | 1.545  | 0.44275 |              | NA |        |
| 322 | PVALB        | A_23_P17844    | 2.2469  | 0.028681 | 1.5424 | 0.44275 | NM_002854    |    | 5816   |
| 323 | MALAT1       | A_19_P00805006 | -2.2436 | 0.028908 | 1.539  | 0.44275 | NR_002819    | NA |        |
| 324 | COL10A1      | A_23_P214144   | 2.2413  | 0.02906  | 1.5367 | 0.44275 | NM_000493    |    | 1300   |
| 325 | TPM1         | A_33_P3335966  | 2.2407  | 0.029101 | 1.5361 | 0.44275 | NM_001018005 |    | 7168   |
| 326 | DPPA5        | A_32_P233950   | 2.2402  | 0.029136 | 1.5356 | 0.44275 | NM_001025290 |    | 340168 |
| 327 | NUDT13       | A_23_P161324   | 2.2388  | 0.029234 | 1.5341 | 0.44275 | NM_015901    |    | 25961  |

|     |                |               |         |          |        |         |              |    |           |
|-----|----------------|---------------|---------|----------|--------|---------|--------------|----|-----------|
| 328 | LOC100507254   | A_21_P0004942 | -2.2371 | 0.029355 | 1.5323 | 0.44275 | NR_038981    | NA |           |
| 329 | PLSCR1         | A_23_P69109   | 2.237   | 0.029362 | 1.5322 | 0.44275 | NM_021105    |    | 5359      |
| 330 | IGF2BP3        | A_23_P19987   | 2.236   | 0.029431 | 1.5312 | 0.44275 | NM_006547    |    | 10643     |
| 331 | FAM46C         | A_33_P3314176 | 2.2354  | 0.029471 | 1.5306 | 0.44275 | NM_017709    |    | 54855     |
| 332 | IGSF9B         | A_33_P3325195 | 2.2332  | 0.029624 | 1.5284 | 0.44275 | NM_014987    |    | 22997     |
| 333 | HDC            | A_23_P117662  | -2.2327 | 0.02966  | 1.5278 | 0.44275 | NM_002112    |    | 3067      |
| 334 | TTY12          | A_23_P148641  | 2.2322  | 0.029697 | 1.5273 | 0.44275 | NR_001551    |    | 83867     |
| 335 | LOC100653060   | A_32_P49668   | 2.232   | 0.029709 | 1.5271 | 0.44275 | XM_003403393 |    | 100653060 |
| 336 | XLOC_003276    | A_21_P0003183 | 2.231   | 0.029777 | 1.5261 | 0.44275 |              | NA |           |
| 337 | XLOC_004308    | A_21_P0003974 | 2.23    | 0.029847 | 1.5251 | 0.44275 |              | NA |           |
| 338 | XLOC_005847    | A_21_P0005061 | 2.2267  | 0.030082 | 1.5217 | 0.44415 |              | NA |           |
| 339 | XLOC_002299    | A_21_P0002097 | 2.2252  | 0.030186 | 1.5202 | 0.44415 |              | NA |           |
| 340 | GOS2           | A_23_P74609   | -2.2249 | 0.03021  | 1.5199 | 0.44415 | NM_015714    |    | 50486     |
| 341 | FKBP1A         | A_23_P397238  | -2.2237 | 0.030297 | 1.5186 | 0.44415 | NM_054014    |    | 2280      |
| 342 | TNFSF15        | A_23_P94754   | 2.219   | 0.030628 | 1.5139 | 0.4473  | NM_005118    |    | 9966      |
| 343 | KCNH4          | A_23_P124988  | 2.2182  | 0.030691 | 1.513  | 0.4473  | NM_012285    |    | 23415     |
| 344 | CST7           | A_23_P68601   | 2.2161  | 0.030843 | 1.5108 | 0.44745 | NM_003650    |    | 8530      |
| 345 | PI16           | A_33_P3215640 | 2.2156  | 0.03088  | 1.5103 | 0.44745 | NM_153370    |    | 221476    |
| 346 | LOC100505966   | A_21_P0014164 | 2.2137  | 0.031014 | 1.5084 | 0.44808 | XR_108660    | NA |           |
| 347 | RHOXF1         | A_23_P85082   | 2.208   | 0.031435 | 1.5026 | 0.45287 | NM_139282    |    | 158800    |
| 348 | OPLAH          | A_23_P170186  | 2.2059  | 0.031589 | 1.5005 | 0.45329 | NM_017570    |    | 26873     |
| 349 | HLA-DRB6       | A_24_P169013  | -2.2051 | 0.031646 | 1.4997 | 0.45329 | NR_001298    |    | 3128      |
| 350 | CHRNA7         | A_32_P35969   | -2.2038 | 0.03174  | 1.4984 | 0.45333 | NM_001190455 |    | 1139      |
| 351 | LOC100128252   | A_32_P204795  | -2.1995 | 0.032062 | 1.494  | 0.45643 | NR_036522    |    | 100128252 |
| 352 | KREMEN1        | A_23_P211401  | 2.1985  | 0.032139 | 1.493  | 0.45643 | NM_001039570 |    | 83999     |
| 353 | TREM1          | A_33_P3319905 | -2.197  | 0.032253 | 1.4914 | 0.45675 | NM_018643    |    | 54210     |
| 354 | TPM1           | A_23_P206018  | 2.1923  | 0.032609 | 1.4867 | 0.46049 | NM_001018004 |    | 7168      |
| 355 | LOC388588      | A_33_P3394868 | 2.1898  | 0.032796 | 1.4842 | 0.46105 | NM_001163724 |    | 388588    |
| 356 | PBX1           | A_24_P173823  | 2.1893  | 0.032834 | 1.4837 | 0.46105 | NM_002585    |    | 5087      |
| 357 | SCARNA6        | A_33_P3230837 | 2.1874  | 0.032985 | 1.4817 | 0.46188 | NR_003006    |    | 677772    |
| 358 | XLOC_I2_015641 | A_21_P0013798 | 2.185   | 0.033165 | 1.4793 | 0.46195 |              | NA |           |
| 359 | LOC155060      | A_23_P254442  | -2.1849 | 0.033174 | 1.4792 | 0.46195 | NR_036573    |    | 155060    |
| 360 | XLOC_005952    | A_21_P0005343 | 2.1829  | 0.033331 | 1.4772 | 0.4624  |              | NA |           |
| 361 | CYP2B6         | A_24_P339514  | 2.1821  | 0.033392 | 1.4764 | 0.4624  | NM_000767    |    | 1555      |
| 362 | CD177          | A_21_P0011751 | 2.1747  | 0.033973 | 1.4689 | 0.46915 | NM_020406    | NA |           |
| 363 | KCNG1          | A_23_P210581  | -2.1732 | 0.03409  | 1.4674 | 0.46946 | NM_002237    |    | 3755      |
| 364 | LOC641518      | A_24_P213788  | -2.169  | 0.034424 | 1.4631 | 0.47276 | NR_029373    |    | 641518    |
| 365 | LOC100506897   | A_21_P0014234 | -2.1666 | 0.034614 | 1.4607 | 0.47407 | XR_133523    | NA |           |
| 366 | KRTAP19-2      | A_33_P3311267 | 2.1643  | 0.034796 | 1.4585 | 0.47526 | NM_181608    |    | 337969    |
| 367 | ITM2C          | A_24_P402690  | -2.163  | 0.034905 | 1.4571 | 0.47545 | NM_030926    |    | 81618     |
| 368 | CD177          | A_23_P259863  | 2.1616  | 0.03502  | 1.4557 | 0.47572 | NM_020406    |    | 57126     |
| 369 | MYB            | A_23_P31073   | -2.1573 | 0.035366 | 1.4514 | 0.47821 | NM_005375    |    | 4602      |
| 370 |                | A_33_P3806676 | 2.1569  | 0.035398 | 1.451  | 0.47821 | AY751906     | NA |           |
| 371 | CD151          | A_33_P3229196 | 2.1558  | 0.03549  | 1.4499 | 0.47821 | NM_004357    |    | 977       |
| 372 | RAB2B          | A_23_P65466   | 2.1511  | 0.035874 | 1.4452 | 0.47997 | NM_032846    |    | 84932     |
| 373 | ACRBP          | A_33_P3396370 | 2.1498  | 0.035982 | 1.4439 | 0.47997 | NM_032489    |    | 84519     |
| 374 | BTG2           | A_23_P62901   | -2.1492 | 0.036037 | 1.4433 | 0.47997 | NM_006763    |    | 7832      |

|     |                |                |         |          |        |         |              |           |
|-----|----------------|----------------|---------|----------|--------|---------|--------------|-----------|
| 375 | MRGPRF         | A_33_P3251984  | 2.1478  | 0.036148 | 1.4419 | 0.47997 | NM_001098515 | 116535    |
| 376 |                | A_33_P3250750  | 2.1471  | 0.036209 | 1.4412 | 0.47997 | CU677518     | NA        |
| 377 | ASPSCR1        | A_33_P3290588  | 2.1469  | 0.036226 | 1.441  | 0.47997 | AK127159     | 79058     |
| 378 | CD99L2         | A_33_P3322892  | 2.1454  | 0.036353 | 1.4395 | 0.47997 | BC025729     | 83692     |
| 379 | PTCRA          | A_33_P3229918  | 2.145   | 0.036389 | 1.439  | 0.47997 | NM_001243168 | 171558    |
| 380 | ANKFY1         | A_33_P3300142  | 2.1432  | 0.036537 | 1.4373 | 0.48012 | NM_016376    | 51479     |
| 381 | MGAT3          | A_24_P245838   | -2.1423 | 0.036616 | 1.4363 | 0.48012 | NM_002409    | 4248      |
| 382 |                | A_33_P3370163  | 2.1408  | 0.036742 | 1.4348 | 0.48012 |              | NA        |
| 383 | NCR3           | A_23_P251881   | -2.1403 | 0.036785 | 1.4343 | 0.48012 | NM_147130    | 259197    |
| 384 | KIAA0040       | A_33_P3243069  | 2.1389  | 0.036897 | 1.433  | 0.48034 | NM_001162893 | 9674      |
| 385 | LOC284263      | A_33_P3663105  | 2.1306  | 0.037607 | 1.4247 | 0.4883  | BC038429     | 284263    |
| 386 | LOC401286      | A_33_P3409238  | -2.126  | 0.038007 | 1.4201 | 0.4903  | XR_110199    | 401286    |
| 387 | CD24           | A_33_P3369844  | -2.1252 | 0.038074 | 1.4194 | 0.4903  | NM_013230    | 100133941 |
| 388 | KRTAP15-1      | A_24_P348845   | 2.1243  | 0.038152 | 1.4185 | 0.4903  | NM_181623    | 254950    |
| 389 | ARNT2          | A_23_P83579    | 2.1241  | 0.038177 | 1.4182 | 0.4903  | NM_014862    | 9915      |
| 390 | XLOC_006980    | A_21_P0005621  | 2.1232  | 0.038251 | 1.4174 | 0.4903  | AK128880     | NA        |
| 391 | C9orf78        | A_23_P9443     | 2.1216  | 0.03839  | 1.4158 | 0.49083 | NM_016520    | 51759     |
| 392 | GGT5           | A_33_P3255304  | -2.1183 | 0.038684 | 1.4125 | 0.49332 | NM_001099781 | 2687      |
| 393 |                | A_33_P3335401  | -2.115  | 0.038979 | 1.4092 | 0.49546 |              | NA        |
| 394 | KIRREL         | A_33_P3221489  | 2.1142  | 0.03905  | 1.4084 | 0.49546 | NM_018240    | 55243     |
| 395 | DACH1          | A_33_P3316786  | -2.1108 | 0.039351 | 1.405  | 0.49703 | NM_080759    | 1602      |
| 396 | XLOC_011047    | A_21_P0008294  | -2.1083 | 0.039576 | 1.4026 | 0.49703 | BX648502     | NA        |
| 397 | PAQR6          | A_23_P97283    | 2.1078  | 0.039622 | 1.4021 | 0.49703 | NM_024897    | 79957     |
| 398 | LOC100652851   | A_33_P3313528  | 2.1075  | 0.039645 | 1.4018 | 0.49703 | XM_003403468 | 100652851 |
| 399 | CNKSR3         | A_23_P134085   | -2.1069 | 0.039702 | 1.4012 | 0.49703 | NM_173515    | 154043    |
| 400 | XLOC_I2_001826 | A_21_P0010932  | 2.1061  | 0.03977  | 1.4004 | 0.49703 | DA828100     | NA        |
| 401 | XLOC_012043    | A_21_P0009138  | 2.1047  | 0.039898 | 1.399  | 0.49739 |              | NA        |
| 402 | ZSWIM7         | A_33_P3269723  | -2.1031 | 0.04005  | 1.3974 | 0.49803 | NM_001042697 | 125150    |
| 403 | LOC203274      | A_33_P3474859  | 2.0986  | 0.040459 | 1.393  | 0.50157 | BC110369     | 203274    |
| 404 | XLOC_I2_009205 | A_19_P00320814 | 2.0976  | 0.040547 | 1.392  | 0.50157 |              | NA        |
| 405 | GPR141         | A_24_P334718   | 2.0957  | 0.040727 | 1.3901 | 0.50157 | NM_181791    | 353345    |
| 406 | PLXNB3         | A_33_P3413038  | 2.0956  | 0.040736 | 1.39   | 0.50157 | NM_001163257 | 5365      |
| 407 | C12orf39       | A_23_P2414     | 2.093   | 0.040975 | 1.3875 | 0.50246 | AK311217     | 80763     |
| 408 | FCGR1B         | A_21_P0010728  | 2.0926  | 0.041009 | 1.3871 | 0.50246 | NM_001244910 | NA        |
| 409 | CCDC64B        | A_33_P3335590  | 2.0911  | 0.041156 | 1.3856 | 0.50271 | NM_001103175 | 146439    |
| 410 | SARM1          | A_33_P3370763  | 2.0903  | 0.041231 | 1.3848 | 0.50271 | NM_015077    | 23098     |
| 411 |                | A_33_P3210258  | -2.0886 | 0.041385 | 1.3832 | 0.50337 | BC030554     | NA        |
| 412 | TMPRSS6        | A_23_P211493   | 2.0865  | 0.041585 | 1.3811 | 0.50413 | NM_153609    | 164656    |
| 413 | FCGR1B         | A_21_P0010561  | 2.0858  | 0.04165  | 1.3804 | 0.50413 | NM_001244910 | NA        |
| 414 | CYB5R2         | A_23_P2181     | -2.084  | 0.041821 | 1.3786 | 0.50422 | NM_016229    | 51700     |
| 415 | EFNA3          | A_24_P114032   | 2.0836  | 0.041858 | 1.3782 | 0.50422 | NM_004952    | 1944      |
| 416 | LUZP6          | A_33_P3230090  | 2.0791  | 0.042283 | 1.3738 | 0.50811 | NM_001128619 | 767558    |
| 417 | XLOC_009336    | A_21_P0007149  | 2.0755  | 0.042628 | 1.3703 | 0.51021 |              | NA        |
| 418 | PAGE2B         | A_33_P3420862  | 2.0752  | 0.042662 | 1.37   | 0.51021 | NM_001015038 | 389860    |
| 419 | GNA12          | A_24_P98086    | 2.0727  | 0.042899 | 1.3675 | 0.51173 | NM_007353    | 2768      |
| 420 |                | A_33_P3269380  | 2.0717  | 0.042997 | 1.3666 | 0.51173 |              | NA        |
| 421 | TEX22          | A_33_P3261695  | 2.0707  | 0.043097 | 1.3656 | 0.51173 | NM_001195082 | 647310    |

|     |                |               |         |          |        |         |              |        |
|-----|----------------|---------------|---------|----------|--------|---------|--------------|--------|
| 422 | XLOC_007401    | A_21_P0006151 | 2.0691  | 0.04325  | 1.364  | 0.51233 |              | NA     |
| 423 | CROCC          | A_21_P0013793 | 2.0579  | 0.044348 | 1.3531 | 0.52411 | NM_014675    | NA     |
| 424 | XLOC_005572    | A_21_P0005151 | 2.0546  | 0.044683 | 1.3499 | 0.52682 |              | NA     |
| 425 | XLOC_001641    | A_21_P0002608 | 2.0533  | 0.044809 | 1.3486 | 0.52706 |              | NA     |
| 426 | JAK3           | A_23_P329112  | 2.0517  | 0.044973 | 1.347  | 0.52775 | NM_000215    | 3718   |
| 427 | CXCR2P1        | A_33_P3375859 | 2.0499  | 0.045151 | 1.3453 | 0.52827 | NR_002712    | 3580   |
| 428 | SLC4A10        | A_24_P930111  | -2.0481 | 0.045334 | 1.3436 | 0.52827 | NM_022058    | 57282  |
| 429 | XLOC_006314    | A_21_P0005271 | 2.0478  | 0.045363 | 1.3433 | 0.52827 | AI198554     | NA     |
| 430 | SYTL4          | A_24_P122337  | 2.0469  | 0.045454 | 1.3424 | 0.52827 | NM_080737    | 94121  |
| 431 | GPR97          | A_33_P3305102 | 2.046   | 0.045546 | 1.3416 | 0.52827 | NM_170776    | 222487 |
| 432 | DCAF12         | A_23_P255257  | 2.0431  | 0.045841 | 1.3387 | 0.53046 | NM_015397    | 25853  |
| 433 | ABP1           | A_23_P59452   | -2.041  | 0.046062 | 1.3367 | 0.53099 | NM_001091    | 26     |
| 434 |                | A_33_P3258324 | -2.0406 | 0.046099 | 1.3363 | 0.53099 |              | NA     |
| 435 | CAMKK1         | A_23_P431933  | -2.0393 | 0.046236 | 1.335  | 0.53134 | NM_032294    | 84254  |
| 436 | NFKBID         | A_23_P383422  | -2.036  | 0.046577 | 1.3318 | 0.5336  | NM_139239    | 84807  |
| 437 | 14-Sep         | A_21_P0011897 | 2.0348  | 0.046698 | 1.3307 | 0.5336  | NM_207366    | NA     |
| 438 | SLC4A10        | A_24_P314786  | -2.0339 | 0.046801 | 1.3297 | 0.5336  | NM_022058    | 57282  |
| 439 | CPA3           | A_23_P18017   | -2.033  | 0.046889 | 1.3289 | 0.5336  | NM_001870    | 1359   |
| 440 | TLR5           | A_23_P85903   | 2.0319  | 0.047007 | 1.3278 | 0.5336  | NM_003268    | 7100   |
| 441 | FKBP8          | A_33_P3272990 | 2.0313  | 0.047073 | 1.3272 | 0.5336  | NM_012181    | 23770  |
| 442 |                | A_33_P3370521 | 2.0283  | 0.047383 | 1.3244 | 0.5359  | XM_001721393 | NA     |
| 443 | INHBB          | A_23_P153964  | 2.027   | 0.047519 | 1.3231 | 0.53623 | NM_002193    | 3625   |
| 444 | XLOC_I2_008976 | A_21_P0012167 | 2.024   | 0.047842 | 1.3202 | 0.53865 |              | NA     |
| 445 | OLIG1          | A_23_P154849  | -2.0218 | 0.048078 | 1.3181 | 0.5401  | NM_138983    | 116448 |
| 446 |                | A_33_P3325871 | 2.0207  | 0.048195 | 1.317  | 0.5402  | BC004487     | NA     |
| 447 |                | A_33_P3358347 | 2.018   | 0.048477 | 1.3145 | 0.54117 |              | NA     |
| 448 |                | A_33_P3233819 | 2.0162  | 0.048675 | 1.3127 | 0.54117 |              | NA     |
| 449 |                | A_33_P3312799 | 2.0153  | 0.048774 | 1.3118 | 0.54117 |              | NA     |
| 450 | C1orf186       | A_23_P95640   | -2.0153 | 0.048774 | 1.3118 | 0.54117 | NM_001007544 | 440712 |
| 451 | KIAA1530       | A_33_P3287113 | 2.0146  | 0.04885  | 1.3111 | 0.54117 | AL390128     | 57654  |
| 452 | ADAMTS17       | A_33_P3309626 | 2.0138  | 0.048932 | 1.3104 | 0.54117 | AK131344     | 170691 |
| 453 |                | A_33_P3285371 | 2.0107  | 0.049273 | 1.3074 | 0.54374 |              | NA     |
| 454 | XLOC_002125    | A_21_P0002057 | -2.006  | 0.049787 | 1.3029 | 0.54657 | AL355732     | NA     |



|                  |     |
|------------------|-----|
| Total in Data 1  | 535 |
| Total in Data 2  | 454 |
| Unique in Data 1 | 532 |
| Unique in Data 2 | 373 |
| Common in both   | 9   |
