# Supplementary material for: Association between Arsenic Level, Gene Expression in Asian Population, and In Vitro Carcinogenic Bladder Tumor
Source: Hindawi journal article supplement (doi:10.1155/2022/3459855), 2022-01-01
Supplement: f6 [file 3459855.f6.pdf]

**Table S5. Significant pathways in Data-1(low, high concentration) and Data-2 (low, medium, high concentrations) and the overlap between two (highlighted in pink).**

| Data1 |                                                                      |               |          |                                                                                                                                                           |
|-------|----------------------------------------------------------------------|---------------|----------|-----------------------------------------------------------------------------------------------------------------------------------------------------------|
| S.No. | Ingenuity Canonical Pathways                                         | -log(p-value) | Ratio    | Molecules                                                                                                                                                 |
| 1     | Pyridoxal 5'-phosphate Salvage Pathway                               | 6.90E+00      | 1.67E-01 | AKT2,BRAF,CDK1,CDK5,DAPK1,MAP2K4,PAK1,PIM1,PLK1,PRKCQ,PRKX                                                                                                |
| 2     | Salvage Pathways of Pyrimidine Ribonucleotides                       | 5.97E+00      | 1.22E-01 | AKT2,APOBEC3G,BRAF,CDK1,CDK5,DAPK1,MAP2K4,PAK1,PIM1,PLK1,PRKCQ,PRKX                                                                                       |
| 3     | Th1 and Th2 Activation Pathway                                       | 5.43E+00      | 8.77E-02 | GFI1,HLA-DMA,HLA-DMB,HLA-DQB2,ICOS,IFNG,IKZF1,IL18,JAK3,mir-29,PRKCQ,PSEN1,PTGDR2,S1PR1,STAT4                                                             |
| 4     | Sperm Motility                                                       | 5.24E+00      | 7.62E-02 | DSTYK,EPHB3,ERBB2,FES,ITK,JAK3,LCK,MAP2K4,MAP3K11,MST1R,NTRK2,PDE4B,PLA2G4A,PLA2G7,PLCB1,PRKCQ,TNK1                                                       |
| 5     | Th2 Pathway                                                          | 5.19E+00      | 9.56E-02 | GFI1,HLA-DMA,HLA-DMB,HLA-DQB2,ICOS,IFNG,IKZF1,JAK3,PRKCQ,PSEN1,PTGDR2,S1PR1,STAT4                                                                         |
| 6     | Systemic Lupus Erythematosus In B Cell Signaling Pathway             | 5.16E+00      | 6.91E-02 | AKT2,BCL2,CBL,CHP1,IFNG,IGHA1,IGHG1,IL17A,IL18,IRF5,LCK,LTB,MYC,PIM2,PRKCQ,RAP1B,TLR8,TNFSF13,TNFSF13B                                                    |
| 7     | IL-15 Production                                                     | 5.00E+00      | 9.92E-02 | DSTYK,EPHB3,ERBB2,FES,ITK,JAK3,LCK,MAP2K4,MAP3K11,MST1R,NTRK2,TNK1                                                                                        |
| 8     | Altered T Cell and B Cell Signaling in Rheumatoid Arthritis          | 4.69E+00      | 1.11E-01 | HLA-DMA,HLA-DMB,IFNG,IL17A,IL18,LTB,TLR8,TNFSF13,TNFSF13B,TRGV9                                                                                           |
| 9     | T Helper Cell Differentiation                                        | 4.64E+00      | 1.23E-01 | HLA-DMA,HLA-DMB,ICOS,IFNG,IL17A,IL18,IL21R,STAT4,TRGV9                                                                                                    |
| 10    | NF-κB Signaling                                                      | 4.54E+00      | 7.82E-02 | AKT2,BRAF,IL18,IL1R1,IRAK3,LCK,LTBR,MAP3K3,NTRK2,PRKCQ,RAP1B,TLR8,TNFSF13B,TRGV9                                                                          |
| 11    | Dendritic Cell Maturation                                            | 4.44E+00      | 7.65E-02 | AKT2,CD1C,CD1D,HLA-DMA,HLA-DMB,IGHG1,IL18,IRF8,LTB,LTBR,MAP2K4,PLCB1,STAT4,TRGV9                                                                          |
| 12    | Prostanoid Biosynthesis                                              | 4.43E+00      | 4.00E-01 | CYP2S1,HPGDS,PTGDS,TBXAS1                                                                                                                                 |
| 13    | Role of Macrophages, Fibroblasts and Endothelial Cells in Rheumatoid | 4.40E+00      | 6.09E-02 | AKT2,CCL2,CHP1,IGHG1,IL17A,IL18,IL1R1,IRAK3,LTB,LTBR,MAP2K4,MYC,PLCB1,PRKCQ,RAP1B,TLR8,TNFSF13B,VEGFA,WNT5B                                               |
| 14    | Cardiac Hypertrophy Signaling (Enhanced)                             | 4.34E+00      | 5.13E-02 | AKT2,CACNA1C,CHP1,FGF13,GNG5,HDAC3,HDAC9,IFNG,IL13RA1,IL17A,IL18,IL1R1,IL21R,LTB,MAP2K4,MAP3K11,MAP3K3,MYC,PDE4B,PLCB1,PRKCQ,RAP1B,TNFSF13,TNFSF13B,WNT5B |
| 15    | CD28 Signaling in T Helper Cells                                     | 4.31E+00      | 9.17E-02 | AKT2,CDC42,CHP1,HLA-DMA,HLA-DMB,ITK,LCK,MAP2K4,PAK1,PRKCQ,TRGV9                                                                                           |
| 16    | Th1 Pathway                                                          | 4.28E+00      | 9.09E-02 | HLA-DMA,HLA-DMB,HLA-DQB2,ICOS,IFNG,IL18,JAK3,mir-29,PRKCQ,PSEN1,STAT4                                                                                     |
| 17    | EIF2 Signaling                                                       | 4.05E+00      | 6.70E-02 | ACTA2,AKT2,BCL2,EIF1AX,EIF2S1,MYC,RAP1B,RPL13,RPS20,RPS26,RPS27A,RPS4X,RPSA,VEGFA,WARS1                                                                   |
| 18    | Nur77 Signaling in T Lymphocytes                                     | 4.04E+00      | 1.18E-01 | BCL2,CHP1,HDAC9,MAP3K3,PCNA,PRKCQ,RXRA,TRGV9                                                                                                              |
| 19    | STAT3 Pathway                                                        | 3.85E+00      | 8.15E-02 | BCL2,IL13RA1,IL1R1,IL21R,MAP2K4,MAP3K11,MYC,NTRK2,PIM1,RAP1B,VEGFA                                                                                        |
| 20    | Tec Kinase Signaling                                                 | 3.70E+00      | 7.32E-02 | ACTA2,CDC42,FCER1A,GNG5,ITK,JAK3,LCK,MAP2K4,PAK1,PRKCQ,STAT4,TRGV9                                                                                        |
| 21    | HMGB1 Signaling                                                      | 3.68E+00      | 7.27E-02 | AKT2,CCL2,CDC42,IFNG,IL17A,IL18,IL1R1,LTB,MAP2K4,RAP1B,TNFSF13,TNFSF13B                                                                                   |
| 22    | Cdc42 Signaling                                                      | 3.63E+00      | 7.19E-02 | BAIAP2,CDC42,EXOC6,HLA-DMA,HLA-DMB,HLA-DQB2,ITK,MAP2K4,MAP3K11,PAK1,RASA1,TRGV9                                                                           |
| 23    | Molecular Mechanisms of Cancer                                       | 3.57E+00      | 5.12E-02 | AKT2,BCL2,BRAF,CBL,CCNE2,CDC42,CDK1,CDK5,JAK3,MAP2K4,MYC,PAK1,PLCB1,PRKCQ,PSEN1,RAP1B,RASA1,SMAD5,SMAD9,WNT5B                                             |
| 24    | Role of MAPK Signaling in the Pathogenesis of Influenza              | 3.55E+00      | 1.00E-01 | AKT2,BCL2,CCL2,IFNG,MAP2K4,PLA2G4A,PLA2G7,RAP1B                                                                                                           |
| 25    | Natural Killer Cell Signaling                                        | 3.52E+00      | 6.60E-02 | AKT2,CDC42,HSPA2,IFNG,IL18,JAK3,LCK,MAP3K11,MAP3K3,PAK1,PRKCQ,RAP1B,STAT4                                                                                 |

|                  |     |
|------------------|-----|
| Total in Data 1  | 180 |
| Total in Data 2  | 50  |
| Common in both   | 14  |
| Unique in Data 1 | 166 |
| Unique in Data 2 | 36  |

|    |                                                                                    |          |          |                                                                                                        |
|----|------------------------------------------------------------------------------------|----------|----------|--------------------------------------------------------------------------------------------------------|
| 26 | T Cell Exhaustion Signaling Pathway                                                | 3.44E+00 | 6.86E-02 | AKT2,HLA-DMA,HLA-DMB,HLA-DQB2,IFNG,JAK3,MAP2K4,PRKCQ,RAP1B,STAT4,TRGV9,VEGFA                           |
| 27 | HER-2 Signaling in Breast Cancer                                                   | 3.40E+00 | 9.52E-02 | AKT2,CCNE2,CDC42,ERBB2,ITGB6,NRG1,PRKCQ,RAP1B                                                          |
| 28 | PKCθ Signaling in T Lymphocytes                                                    | 3.33E+00 | 7.10E-02 | CACNA1C,CHP1,HLA-DMA,HLA-DMB,LCK,MAP2K4,MAP3K11,MAP3K3,PRKCQ,RAP1B,TRGV9                               |
| 29 | Mitotic Roles of Polo-Like Kinase                                                  | 3.32E+00 | 1.06E-01 | CCNB2,CDK1,FBXO5,KIF11,PLK1,PLK4,SMC1A                                                                 |
| 30 | Role of NFAT in Regulation of the Immune Response                                  | 3.31E+00 | 6.63E-02 | AKT2,CHP1,FCER1A,GNG5,HLA-DMA,HLA-DMB,ITK,LCK,PLCB1,PRKCQ,RAP1B,TRGV9                                  |
| 31 | IL-12 Signaling and Production in Macrophages                                      | 3.30E+00 | 7.58E-02 | AKT2,APOE,IFNG,IL18,IRF8,MAP2K4,MST1R,PRKCQ,RXRA,STAT4                                                 |
| 32 | iCOS-iCOSL Signaling in T Helper Cells                                             | 3.23E+00 | 8.11E-02 | AKT2,CHP1,HLA-DMA,HLA-DMB,ICOS,ITK,LCK,PRKCQ,TRGV9                                                     |
| 33 | HGF Signaling                                                                      | 3.23E+00 | 8.11E-02 | AKT2,CDC42,ETS2,MAP2K4,MAP3K11,MAP3K3,PAK1,PRKCQ,RAP1B                                                 |
| 34 | Acute Myeloid Leukemia Signaling                                                   | 3.23E+00 | 8.99E-02 | AKT2,BRAF,IDH1,MAP2K4,MYC,PIM1,PIM2,RAP1B                                                              |
| 35 | DNA damage-induced 14-3-3σ Signaling                                               | 3.23E+00 | 2.11E-01 | AKT2,CCNB2,CCNE2,CDK1                                                                                  |
| 36 | Neuroinflammation Signaling Pathway                                                | 3.17E+00 | 5.35E-02 | AKT2,BCL2,CCL2,CHP1,HLA-DMA,HLA-DMB,IFNG,IL18,IL1R1,IRAK3,JAK3,MAP2K4,NCF2,PLA2G4A,PSEN1,TLR8          |
| 37 | Production of Nitric Oxide and Reactive Oxygen Species in Macrophages              | 3.17E+00 | 6.38E-02 | AKT2,APOE,CDC42,IFNG,IRF8,JAK3,MAP2K4,MAP3K11,MAP3K3,NCF2,PRKCQ,RAP1B                                  |
| 38 | Th17 Activation Pathway                                                            | 3.16E+00 | 8.79E-02 | IFNG,IL17A,IL1R1,IL21R,IRAK3,JAK3,STAT4,TRGV9                                                          |
| 39 | Fcγ Receptor-mediated Phagocytosis in Macrophages and Monocytes                    | 3.07E+00 | 8.51E-02 | ACTA2,AKT2,CBL,CDC42,PAK1,PIP5K1A,PLD3,PRKCQ                                                           |
| 40 | Airway Pathology in Chronic Obstructive Pulmonary Disease                          | 3.04E+00 | 7.63E-02 | CCL2,FGF13,IFNG,IL17A,IL18,LTB,PTGDS,TNFSF13,TNFSF13B                                                  |
| 41 | Hepatic Fibrosis Signaling Pathway                                                 | 3.04E+00 | 4.89E-02 | ACTA2,AKT2,BCL2,BRAF,CACNA1C,CCL2,CDC42,IL17A,IL18,IL1R1,IRAK3,MAP2K4,MYC,NCF2,PRKCQ,RAP1B,VEGFA,WNT5B |
| 42 | Neuregulin Signaling                                                               | 3.01E+00 | 8.33E-02 | AKT2,CDK5,ERBB2,MYC,NRG1,PRKCQ,PSEN1,RAP1B                                                             |
| 43 | Communication between Innate and Adaptive Immune Cells                             | 3.01E+00 | 8.33E-02 | IFNG,IGHA1,IGHG1,IL18,TLR8,TNFSF13,TNFSF13B,TRGV9                                                      |
| 44 | IL-8 Signaling                                                                     | 2.93E+00 | 6.00E-02 | AKT2,BCL2,BRAF,CDC42,GNG5,IRAK3,MAP2K4,NCF2,PLD3,PRKCQ,RAP1B,VEGFA                                     |
| 45 | Phospholipase C Signaling                                                          | 2.92E+00 | 5.45E-02 | CDC42,CHP1,GNG5,HDAC3,HDAC9,IGHG1,ITK,LCK,PLA2G4A,PLCB1,PLD3,PRKCQ,RAP1B,TRGV9                         |
| 46 | Aggrin Interactions at Neuromuscular Junction                                      | 2.89E+00 | 8.97E-02 | ACTA2,CDC42,ERBB2,MAP2K4,NRG1,PAK1,RAP1B                                                               |
| 47 | BEX2 Signaling Pathway                                                             | 2.85E+00 | 8.86E-02 | AKT2,BCL2,ERBB2,ITGB6,MAP2K4,SMARCB1,VEGFA                                                             |
| 48 | SAPK/JNK Signaling                                                                 | 2.84E+00 | 7.84E-02 | CDC42,GNG5,LCK,MAP2K4,MAP3K11,MAP3K3,RAP1B,TRGV9                                                       |
| 49 | Role of Pattern Recognition Receptors in Recognition of Bacteria and Viruses       | 2.78E+00 | 6.49E-02 | EIF2S1,IFNG,IL17A,IL18,LTB,MAP2K4,PRKCQ,TLR8,TNFSF13,TNFSF13B                                          |
| 50 | Huntington's Disease Signaling                                                     | 2.78E+00 | 5.49E-02 | AKT2,CDK5,GNG5,HDAC3,HDAC9,HSPA2,MAP2K4,PLCB1,PRKCQ,PSME2,RASA1,RPS27A,SH3GL3                          |
| 51 | mTOR Signaling                                                                     | 2.75E+00 | 5.71E-02 | AKT2,CDC42,FKBP1A,PLD3,PRKCQ,RAP1B,RPS20,RPS26,RPS27A,RPS4X,RPSA,VEGFA                                 |
| 52 | PD-1, PD-L1 cancer immunotherapy pathway                                           | 2.73E+00 | 7.55E-02 | AKT2,HLA-DMA,HLA-DMB,HLA-DQB2,IFNG,JAK3,LCK,PRKCQ                                                      |
| 53 | Hepatic Cholestasis                                                                | 2.70E+00 | 5.95E-02 | IFNG,IL17A,IL18,IL1R1,IRAK3,LTB,MAP2K4,PRKCQ,RXRA,TNFSF13,TNFSF13B                                     |
| 54 | Pancreatic Adenocarcinoma Signaling                                                | 2.66E+00 | 7.34E-02 | AKT2,BCL2,CDC42,ERBB2,JAK3,MAP2K4,PLD3,VEGFA                                                           |
| 55 | Regulation of Transition of Epithelial to Mesenchymal Transition By Growth Factors | 2.65E+00 | 5.85E-02 | AKT2,BRAF,CDC42,ERBB2,FGF13,JAK3,LTB,MAP2K4,RAP1B,TNFSF13,TNFSF13B                                     |
| 56 | Role of Osteoblasts, Osteoclasts and Chondrocytes in Rheumatoid Arthritis          | 2.59E+00 | 5.45E-02 | AKT2,BCL2,CBL,CHP1,IFNG,IL17A,IL18,IL1R1,MAP2K4,SMAD5,SMAD9,WNT5B                                      |
| 57 | Rac Signaling                                                                      | 2.58E+00 | 7.14E-02 | BAIAP2,CDC42,MAP2K4,MAP3K11,NCF2,PAK1,PIP5K1A,RAP1B                                                    |

|    |                                                                  |          |          |                                                                                                              |
|----|------------------------------------------------------------------|----------|----------|--------------------------------------------------------------------------------------------------------------|
| 58 | Calcium-induced T Lymphocyte Apoptosis                           | 2.57E+00 | 9.09E-02 | CHP1,HLA-DMA,HLA-DMB,LCK,PRKCQ,TRGV9                                                                         |
| 59 | Eicosanoid Signaling                                             | 2.57E+00 | 9.09E-02 | HPGDS,LTA4H,PLA2G4A,PLA2G7,PTGDS,TBXAS1                                                                      |
| 60 | Colorectal Cancer Metastasis Signaling                           | 2.53E+00 | 5.14E-02 | AKT2,BRAF,CDC42,GNG5,IFNG,JAK3,MAP2K4,MYC,RAP1B,SIAH1,TLR8,VEGFA,WNT5B                                       |
| 61 | fMLP Signaling in Neutrophils                                    | 2.49E+00 | 6.90E-02 | CDC42,CHP1,FPR3,GNG5,NCF2,PLCB1,PRKCQ,RAP1B                                                                  |
| 62 | Graft-versus-Host Disease Signaling                              | 2.48E+00 | 1.04E-01 | HLA-DMA,HLA-DMB,IFNG,IL18,TRGV9                                                                              |
| 63 | ErbB Signaling                                                   | 2.42E+00 | 7.45E-02 | CDC42,ERBB2,MAP2K4,NRG1,PAK1,PRKCQ,RAP1B                                                                     |
| 64 | GNRH Signaling                                                   | 2.42E+00 | 5.78E-02 | CACNA1C,CDC42,GNG5,MAP2K4,MAP3K11,MAP3K3,PAK1,PLCB1,PRKCQ,RAP1B                                              |
| 65 | Primary Immunodeficiency Signaling                               | 2.40E+00 | 1.00E-01 | ICOS,IGHA1,IGHG1,JAK3,LCK                                                                                    |
| 66 | Ephrin B Signaling                                               | 2.38E+00 | 8.33E-02 | CBL,CDC42,EPHB3,GNG5,ITSN1,PAK1                                                                              |
| 67 | LXR/RXR Activation                                               | 2.38E+00 | 6.61E-02 | APOE,CCL2,HMGCR,IL18,IL1R1,MSR1,RXRA,SCD                                                                     |
| 68 | HIF1 $\alpha$ Signaling                                          | 2.36E+00 | 5.37E-02 | AKT2,BRAF,CHP1,HK2,HSPA2,IL17A,MAP2K4,NCF2,PRKCQ,RAP1B,VEGFA                                                 |
| 69 | VEGF Signaling                                                   | 2.30E+00 | 7.07E-02 | ACTA2,AKT2,BCL2,EIF1AX,EIF2S1,RAP1B,VEGFA                                                                    |
| 70 | IL-15 Signaling                                                  | 2.30E+00 | 8.00E-02 | AKT2,IL17A,JAK3,LCK,MYC,RAP1B                                                                                |
| 71 | Transcriptional Regulatory Network in Embryonic Stem Cells       | 2.26E+00 | 9.26E-02 | GATA6,H4C2,H4C8,H4C9,ZFX3                                                                                    |
| 72 | Protein Ubiquitination Pathway                                   | 2.25E+00 | 4.76E-02 | CBL,DNAJC30,HSPA2,IFNG,PSMD10,PSMD7,PSME2,RPS27A,UBE2A,UBE2E2,UBE2T,UBE3A,USP18                              |
| 73 | Integrin Signaling                                               | 2.24E+00 | 5.16E-02 | ACTA2,AKT2,ARF3,BRAF,CDC42,ITGB6,MAP2K4,MAP3K11,PAK1,RAP1B,TSPAN5                                            |
| 74 | Senescence Pathway                                               | 2.23E+00 | 4.73E-02 | AKT2,ASXL3,BRAF,CACNA1C,CCNB2,CDK1,CHP1,ETS2,MAP2K4,RAP1B,SMAD5,SMAD9,YPEL3                                  |
| 75 | IL-7 Signaling Pathway                                           | 2.21E+00 | 7.69E-02 | AKT2,BCL2,IFNG,IGHG1,JAK3,MYC                                                                                |
| 76 | Reelin Signaling in Neurons                                      | 2.21E+00 | 6.20E-02 | AKT2,APOE,CDC42,CDK5,LCK,MAP2K4,MAP3K11,RAP1B                                                                |
| 77 | NER Pathway                                                      | 2.21E+00 | 6.80E-02 | H4C2,H4C8,H4C9,PCNA,POLD2,RFC4,TOP2A                                                                         |
| 78 | Regulation of eIF4 and p70S6K Signaling                          | 2.20E+00 | 5.73E-02 | AKT2,EIF1AX,EIF2S1,RAP1B,RPS20,RPS26,RPS27A,RPS4X,RPSA                                                       |
| 79 | Tryptophan Degradation to 2-amino-3-carboxymuconate Semialdehyde | 2.20E+00 | 3.33E-01 | HAAO,KYNU                                                                                                    |
| 80 | Semaphorin Neuronal Repulsive Signaling Pathway                  | 2.19E+00 | 6.15E-02 | AKT2,CDK5,ERBB2,FES,MAP2K4,PAK1,PDE4B,VCAN                                                                   |
| 81 | Cell Cycle Control of Chromosomal Replication                    | 2.19E+00 | 8.93E-02 | CDK1,CDK5,MCM8,PCNA,TOP2A                                                                                    |
| 82 | T Cell Receptor Signaling                                        | 2.16E+00 | 6.67E-02 | CBL,ITK,LCK,MAP2K4,PRKCQ,RAP1B,RASA1                                                                         |
| 83 | Renal Cell Carcinoma Signaling                                   | 2.16E+00 | 7.50E-02 | AKT2,CDC42,PAK1,RAP1B,RPS27A,VEGFA                                                                           |
| 84 | GADD45 Signaling                                                 | 2.15E+00 | 1.58E-01 | CCNE2,CDK1,PCNA                                                                                              |
| 85 | MSP-RON Signaling Pathway                                        | 2.12E+00 | 8.62E-02 | ACTA2,CCL2,IFNG,KLK2,MST1R                                                                                   |
| 86 | Axonal Guidance Signaling                                        | 2.12E+00 | 3.93E-02 | AKT2,BAIAP2,CDC42,CDK5,CHP1,EPHB3,ERBB2,FES,GNG5,ITSN1,NTRK2,PAK1,PLCB1,PRKCQ,RAP1B,RASA1,SEMA3C,VEGFA,WNT5B |
| 87 | Clathrin-mediated Endocytosis Signaling                          | 2.09E+00 | 5.18E-02 | ACTA2,APOE,CBL,CDC42,CHP1,FGF13,ITGB6,RPS27A,SH3GL3,VEGFA                                                    |
| 88 | RAR Activation                                                   | 2.07E+00 | 5.15E-02 | AKT2,MAP2K4,PNPLA4,PRKCQ,RDH13,RXRA,SMAD5,SMAD9,SMARCB1,VEGFA                                                |
| 89 | Antigen Presentation Pathway                                     | 2.05E+00 | 1.03E-01 | HLA-DMA,HLA-DMB,HLA-DQB2,IFNG                                                                                |
| 90 | IL-4 Signaling                                                   | 2.04E+00 | 7.06E-02 | AKT2,HLA-DMA,HLA-DMB,IL13RA1,JAK3,RAP1B                                                                      |
| 91 | Type I Diabetes Mellitus Signaling                               | 2.03E+00 | 6.31E-02 | BCL2,HLA-DMA,HLA-DMB,IFNG,IL1R1,MAP2K4,TRGV9                                                                 |
| 92 | Allograft Rejection Signaling                                    | 2.01E+00 | 6.98E-02 | HLA-DMA,HLA-DMB,HLA-DQB2,IFNG,IGHG1,TRGV9                                                                    |
| 93 | Hereditary Breast Cancer Signaling                               | 2.01E+00 | 5.71E-02 | AKT2,CDK1,HDAC3,HDAC9,RAP1B,RFC4,RPS27A,SMARCB1                                                              |
| 94 | RANK Signaling in Osteoclasts                                    | 1.97E+00 | 6.82E-02 | AKT2,CBL,CHP1,MAP2K4,MAP3K11,MAP3K3                                                                          |
| 95 | Xenobiotic Metabolism General Signaling Pathway                  | 1.95E+00 | 5.59E-02 | AKT2,MAP2K4,MAP3K11,MAP3K3,MGST1,PRKCQ,RAP1B,RXRA                                                            |
| 96 | Phospholipases                                                   | 1.95E+00 | 7.81E-02 | PLA2G15,PLA2G4A,PLA2G7,PLCB1,PLD3                                                                            |

|     |                                                                           |          |          |                                                                      |
|-----|---------------------------------------------------------------------------|----------|----------|----------------------------------------------------------------------|
| 97  | Salvage Pathways of Pyrimidine Deoxyribonucleotides                       | 1.94E+00 | 2.50E-01 | APOBEC3G,TK2                                                         |
| 98  | OX40 Signaling Pathway                                                    | 1.92E+00 | 6.67E-02 | BCL2,HLA-DMA,HLA-DMB,HLA-DQB2,MAP2K4,TRGV9                           |
| 99  | ErbB2-ErbB3 Signaling                                                     | 1.92E+00 | 7.69E-02 | ERBB2,JAK3,MYC,NRG1,RAP1B                                            |
| 100 | Differentiation of Intestinal Epithelial Cells by Production of Cytokines | 1.92E+00 | 1.30E-01 | CCL2,IFNG,IL17A                                                      |
| 101 | Tryptophan Degradation III (Eukaryotic)                                   | 1.92E+00 | 1.30E-01 | CYP2S1,HAPO,KYNU                                                     |
| 102 | Role of Tissue Factor in Cancer                                           | 1.91E+00 | 5.98E-02 | AKT2,CDC42,LCK,PAK1,PLCB1,RAP1B,VEGFA                                |
| 103 | Role of Hyaline Membrane Protein in the Pathogenesis of                   | 1.90E+00 | 9.30E-02 | CCL2,IFNG,IL17A,IL18                                                 |
| 104 | BAG2 Signaling Pathway                                                    | 1.90E+00 | 9.30E-02 | ANXA2,HSPA2,MYC,PSME2                                                |
| 105 | p38 MAPK Signaling                                                        | 1.90E+00 | 5.93E-02 | H3C3,IL18,IL1R1,IRAK3,MAP2K4,MYC,PLA2G4A                             |
| 106 | Role of NANOG in Mammalian Embryonic Stem Cell Pluripotency               | 1.88E+00 | 5.88E-02 | AKT2,GATA6,JAK3,RAP1B,SMAD5,SMAD9,WNT5B                              |
| 107 | Glutathione Redox Reactions I                                             | 1.87E+00 | 1.25E-01 | GPX1,GPX7,MGST1                                                      |
| 108 | Cell Cycle: G1/S Checkpoint Regulation                                    | 1.87E+00 | 7.46E-02 | CCNE2,HDAC3,HDAC9,MYC,NRG1                                           |
| 109 | Coronavirus Pathogenesis Pathway                                          | 1.84E+00 | 5.33E-02 | BCL2,CCL2,MAP2K4,RPS20,RPS26,RPS27A,RPS4X,RPSA                       |
| 110 | Ephrin Receptor Signaling                                                 | 1.84E+00 | 5.00E-02 | AKT2,CDC42,EPHB3,GNG5,ITSN1,PAK1,RAP1B,RASA1,VEGFA                   |
| 111 | Insulin Secretion Signaling Pathway                                       | 1.84E+00 | 4.53E-02 | CACNA1C,EIF2S1,JAK3,LCK,PC,PLCB1,PRKCQ,PRLR,RAP1B,SEC11A,STAT4       |
| 112 | G Beta Gamma Signaling                                                    | 1.82E+00 | 5.74E-02 | AKT2,CACNA1C,CDC42,GNG5,PAK1,PRKCQ,RAP1B                             |
| 113 | Inhibition of ARE-Mediated mRNA Degradation Pathway                       | 1.82E+00 | 5.74E-02 | AKT2,DDX6,LTB,PSME2,TIA1,TNFSF13,TNFSF13B                            |
| 114 | Signaling by Rho Family GTPases                                           | 1.82E+00 | 4.51E-02 | ACTA2,BAIAP2,CDC42,GNG5,MAP2K4,MAP3K11,NCF2,PAK1,PIP5K1A,RDX,SEPTIN6 |
| 115 | Role of NFAT in Cardiac Hypertrophy                                       | 1.80E+00 | 4.67E-02 | AKT2,CACNA1C,CHP1,GNG5,HDAC3,HDAC9,MAP2K4,PLCB1,PRKCQ,RAP1B          |
| 116 | TGF-β Signaling                                                           | 1.79E+00 | 6.25E-02 | BCL2,CDC42,MAP2K4,RAP1B,SMAD5,SMAD9                                  |
| 117 | Opioid Signaling Pathway                                                  | 1.79E+00 | 4.45E-02 | AKT2,BRAF,CACNA1C,CDC42,GNG5,LCK,MAP2K4,MYC,PLCB1,PRKCQ,RAP1B        |
| 118 | Bladder Cancer Signaling                                                  | 1.77E+00 | 6.19E-02 | DAPK1,ERBB2,FGF13,MYC,RAP1B,VEGFA                                    |
| 119 | Lipid Antigen Presentation by CD1                                         | 1.77E+00 | 1.15E-01 | CD1C,CD1D,TRGV9                                                      |
| 120 | Estrogen-mediated S-phase Entry                                           | 1.77E+00 | 1.15E-01 | CCNE2,CDK1,MYC                                                       |
| 121 | Phagosome Formation                                                       | 1.77E+00 | 5.60E-02 | CDC42,FCER1A,IGHG1,MSR1,PLCB1,PRKCQ,TLR8                             |
| 122 | Small Cell Lung Cancer Signaling                                          | 1.77E+00 | 7.04E-02 | AKT2,BCL2,CCNE2,MYC,RXRA                                             |
| 123 | Sertoli Cell-Sertoli Cell Junction Signaling                              | 1.77E+00 | 4.86E-02 | ACTA2,AKT2,CDC42,F11R,MAP2K4,MAP3K11,MAP3K3,RAP1B,SPTAN1             |
| 124 | B Cell Receptor Signaling                                                 | 1.77E+00 | 4.86E-02 | AKT2,CDC42,IGHA1,IGHG1,MAP2K4,MAP3K11,MAP3K3,PRKCQ,RAP1B             |
| 125 | Atherosclerosis Signaling                                                 | 1.74E+00 | 5.51E-02 | APOE,CCL2,IFNG,IL18,MSR1,PLA2G4A,PLA2G7                              |
| 126 | Apoptosis Signaling                                                       | 1.73E+00 | 6.06E-02 | BCL2,CDK1,MAP2K4,PRKCQ,RAP1B,SPTAN1                                  |
| 127 | Autoimmune Thyroid Disease Signaling                                      | 1.71E+00 | 8.16E-02 | HLA-DMA,HLA-DMB,IGHG1,TRGV9                                          |
| 128 | Cell Cycle: G2/M DNA Damage Checkpoint Regulation                         | 1.71E+00 | 8.16E-02 | CCNB2,CDK1,PLK1,TOP2A                                                |
| 129 | HOTAIR Regulatory Pathway                                                 | 1.69E+00 | 5.00E-02 | AKT2,ERBB2,H3C3,HOXD10,let-7,mir-29,MYC,WNT5B                        |
| 130 | Mouse Embryonic Stem Cell Pluripotency                                    | 1.66E+00 | 5.83E-02 | AKT2,JAK3,MYC,RAP1B,SMAD5,SMAD9                                      |
| 131 | Toll-like Receptor Signaling                                              | 1.65E+00 | 6.58E-02 | IL18,IRAK3,MAP2K4,RPS27A,TLR8                                        |
| 132 | Macropinocytosis Signaling                                                | 1.65E+00 | 6.58E-02 | CDC42,ITGB6,PAK1,PRKCQ,RAP1B                                         |
| 133 | UVC-Induced MAPK Signaling                                                | 1.65E+00 | 7.84E-02 | BRAF,MAP2K4,PRKCQ,RAP1B                                              |



|     |                                                            |          |          |                                                                                |
|-----|------------------------------------------------------------|----------|----------|--------------------------------------------------------------------------------|
| 134 | Estrogen Receptor Signaling                                | 1.64E+00 | 3.96E-02 | AKT2,BCL2,CACNA1C,GNG5,HDAC3,JAK3,MYC,PAK1,PCNA,PLCB1,PRKCQ,RAP1B,VEGFA        |
| 135 | Systemic Lupus Erythematosus Signaling                     | 1.62E+00 | 4.37E-02 | AKT2,CBL,IGHG1,IL18,LCK,LSM7,PIM2,RAP1B,TNFSF13B,TRGV9                         |
| 136 | Leukocyte Extravasation Signaling                          | 1.61E+00 | 4.57E-02 | ACTA2,CDC42,F11R,ITK,MAP2K4,NCF2,PRKCQ,RAP1B,RDX                               |
| 137 | Glucose and Glucose-1-phosphate Degradation                | 1.59E+00 | 1.67E-01 | HK2,RGN                                                                        |
| 138 | NAD biosynthesis II (from tryptophan)                      | 1.59E+00 | 1.67E-01 | HAAO,KYNU                                                                      |
| 139 | CXCR4 Signaling                                            | 1.59E+00 | 4.79E-02 | AKT2,CDC42,GNG5,MAP2K4,PAK1,PLCB1,PRKCQ,RAP1B                                  |
| 140 | IL-3 Signaling                                             | 1.59E+00 | 6.33E-02 | AKT2,CHP1,PAK1,PRKCQ,RAP1B                                                     |
| 141 | Thyroid Cancer Signaling                                   | 1.59E+00 | 6.33E-02 | AKT2,BRAF,MYC,NTRK2,RAP1B                                                      |
| 142 | Virus Entry via Endocytic Pathways                         | 1.59E+00 | 5.61E-02 | ACTA2,CDC42,ITGB6,ITSN1,PRKCQ,RAP1B                                            |
| 143 | Telomerase Signaling                                       | 1.59E+00 | 5.61E-02 | AKT2,ETS2,HDAC3,HDAC9,MYC,RAP1B                                                |
| 144 | Systemic Lupus Erythematosus In T Cell Signaling Pathway   | 1.59E+00 | 3.89E-02 | AKT2,CBL,CDC42,CHP1,HLA-DMA,HLA-DMB,HLA-DQB2,ICOS,IL17A,MAP2K4,RAP1B,RDX,TRGV9 |
| 145 | IL-17 Signaling                                            | 1.57E+00 | 6.25E-02 | AKT2,CCL2,IL17A,MAP2K4,RAP1B                                                   |
| 146 | G Protein Signaling Mediated by Tubby                      | 1.57E+00 | 9.68E-02 | GNG5,LCK,PLCB1                                                                 |
| 147 | Paxillin Signaling                                         | 1.57E+00 | 5.56E-02 | ACTA2,CDC42,ITGB6,MAP2K4,PAK1,RAP1B                                            |
| 148 | Prolactin Signaling                                        | 1.55E+00 | 6.17E-02 | MYC,NMI,PRKCQ,PRLR,RAP1B                                                       |
| 149 | Cyclins and Cell Cycle Regulation                          | 1.55E+00 | 6.17E-02 | CCNB2,CCNE2,CDK1,HDAC3,HDAC9                                                   |
| 150 | UDP-N-acetyl-D-galactosamine Biosynthesis II               | 1.53E+00 | 1.54E-01 | HK2,UAP1                                                                       |
| 151 | LPS-stimulated MAPK Signaling                              | 1.53E+00 | 6.10E-02 | CDC42,MAP2K4,PAK1,PRKCQ,RAP1B                                                  |
| 152 | Role of CHK Proteins in Cell Cycle Checkpoint Control      | 1.49E+00 | 7.02E-02 | CDK1,PCNA,PLK1,RFC4                                                            |
| 153 | VEGF Family Ligand-Receptor Interactions                   | 1.49E+00 | 5.95E-02 | AKT2,PLA2G4A,PRKCQ,RAP1B,VEGFA                                                 |
| 154 | NGF Signaling                                              | 1.47E+00 | 5.26E-02 | AKT2,CDC42,MAP2K4,MAP3K11,MAP3K3,RAP1B                                         |
| 155 | Cancer Drug Resistance By Drug Efflux                      | 1.47E+00 | 6.90E-02 | ABCG2,AKT2,BRAF,RAP1B                                                          |
| 156 | Synaptogenesis Signaling Pathway                           | 1.47E+00 | 3.85E-02 | AKT2,APOE,BRAF,CADM1,CDC42,CDK5,EPHB3,ITSN1,LCK,NTRK2,PAK1,RAP1B               |
| 157 | Inhibition of Angiogenesis by TSP1                         | 1.46E+00 | 8.82E-02 | AKT2,MAP2K4,VEGFA                                                              |
| 158 | Apelin Endothelial Signaling Pathway                       | 1.45E+00 | 5.22E-02 | AKT2,CCL2,MAP2K4,PLCB1,PRKCQ,RAP1B                                             |
| 159 | PDGF Signaling                                             | 1.45E+00 | 5.81E-02 | JAK3,MAP2K4,MYC,RAP1B,RASA1                                                    |
| 160 | DNA Methylation and Transcriptional Repression Signaling   | 1.43E+00 | 8.57E-02 | H4C2,H4C8,H4C9                                                                 |
| 161 | Fc Epsilon RI Signaling                                    | 1.42E+00 | 5.13E-02 | AKT2,FCER1A,MAP2K4,PLA2G4A,PRKCQ,RAP1B                                         |
| 162 | Role of PKR in Interferon Induction and Antiviral Response | 1.42E+00 | 5.13E-02 | EIF2S1,HSPA2,IFNG,IL18,MAP2K4,MSR1                                             |
| 163 | Semaphorin Signaling in Neurons                            | 1.42E+00 | 6.67E-02 | CDC42,CDK5,FES,PAK1                                                            |
| 164 | Endometrial Cancer Signaling                               | 1.42E+00 | 6.67E-02 | AKT2,ERBB2,MYC,RAP1B                                                           |
| 165 | Ceramide Signaling                                         | 1.41E+00 | 5.68E-02 | AKT2,BCL2,MAP2K4,RAP1B,S1PR1                                                   |
| 166 | IL-2 Signaling                                             | 1.40E+00 | 6.56E-02 | AKT2,JAK3,LCK,RAP1B                                                            |
| 167 | Factors Promoting Cardiogenesis in Vertebrates             | 1.39E+00 | 4.67E-02 | MAP2K4,MYC,PLCB1,PRKCQ,SMAD5,SMAD9,WNT5B                                       |
| 168 | Crosstalk between Dendritic Cells and Natural Killer Cells | 1.39E+00 | 5.62E-02 | ACTA2,IFNG,IL18,LTB,LTBR                                                       |
| 169 | Cholecystokinin/Gastrin-mediated Signaling                 | 1.39E+00 | 5.04E-02 | CDC42,IL18,MAP2K4,PLCB1,PRKCQ,RAP1B                                            |
| 170 | Formaldehyde Oxidation II (Glutathione-dependent)          | 1.38E+00 | 5.00E-01 | ADH5                                                                           |
| 171 | Actin Cytoskeleton Signaling                               | 1.37E+00 | 4.13E-02 | ACTA2,BAIAP2,CDC42,FGF13,PAK1,PIP5K1A,RAP1B,RDX,TMSB4Y                         |
| 172 | Mismatch Repair in Eukaryotes                              | 1.36E+00 | 1.25E-01 | PCNA,RFC4                                                                      |
| 173 | IL-17A Signaling in Airway Cells                           | 1.34E+00 | 6.25E-02 | AKT2,IL17A,JAK3,MAP2K4                                                         |

|              |                                                                                                       |                      |              |                                                                                                               |
|--------------|-------------------------------------------------------------------------------------------------------|----------------------|--------------|---------------------------------------------------------------------------------------------------------------|
| 174          | Endothelin-1 Signaling                                                                                | 1.33E+00             | 4.26E-02     | BRAF,MYC,PLA2G4A,PLA2G7,PLCB1,PLD3,PRKCQ,RAP1B                                                                |
| 175          | CCR3 Signaling in Eosinophils                                                                         | 1.32E+00             | 4.84E-02     | GNG5,PAK1,PLA2G4A,PLCB1,PRKCQ,RAP1B                                                                           |
| 176          | Regulation of Actin-based Motility by Rho                                                             | 1.31E+00             | 5.32E-02     | ACTA2,BAIAP2,CDC42,PAK1,PIP5K1A                                                                               |
| 177          | CCR5 Signaling in Macrophages                                                                         | 1.31E+00             | 5.32E-02     | CACNA1C,GNG5,MAP2K4,PRKCQ,TRGV9                                                                               |
| 178          | ILK Signaling                                                                                         | 1.31E+00             | 4.21E-02     | ACTA2,AKT2,CDC42,ITGB6,MAP2K4,MYC,TMSB4Y,VEGFA                                                                |
| 179          | Histamine Degradation                                                                                 | 1.31E+00             | 1.18E-01     | ALDH3B1,HNMT                                                                                                  |
| 180          | IL-6 Signaling                                                                                        | 1.31E+00             | 4.80E-02     | AKT2,IL18,IL1R1,MAP2K4,RAP1B,VEGFA                                                                            |
|              | Data2                                                                                                 |                      |              |                                                                                                               |
| <b>S.No.</b> | <b>Ingenuity Canonical Pathways</b>                                                                   | <b>-log(p-value)</b> | <b>Ratio</b> | <b>Molecules</b>                                                                                              |
| 1            | Atherosclerosis Signaling                                                                             | 6.43E+00             | 8.66E-02     | ALOX15,CCL2,CCR3,CLU,COL10A1,CXCL8,CXCR4,PLAAT1,SELP,SERPINA1,TNFRSF12A                                       |
| 2            | Granulocyte Adhesion and Diapedesis                                                                   | 4.95E+00             | 6.11E-02     | CCL2,CCL23,CCL4,CLDN5,CXCL5,CXCL8,CXCR4,ITGB3,PF4,PPBP,SELP                                                   |
| 3            | Agranulocyte Adhesion and Diapedesis                                                                  | 4.67E+00             | 5.70E-02     | CCL2,CCL23,CCL4,CLDN5,CXCL5,CXCL8,CXCR4,MYL9,PF4,PPBP,SELP                                                    |
| 4            | Coagulation System                                                                                    | 3.11E+00             | 1.14E-01     | F13A1,PROS1,SERPINA1,VWF                                                                                      |
| 5            | Breast Cancer Regulation by Stathmin1                                                                 | 3.10E+00             | 2.88E-02     | ADGRE1,ADGRG3,ADORA3,C3AR1,CCR3,CNR2,CXCR6,GLP2R,GPR141,GPR34,GPR87,HCRT R1,HTR1B,P2RY14,P2RY2,PRKAR2B,PTGDR2 |
| 6            | Cellular Effects of Sildenafil (Viagra)                                                               | 3.00E+00             | 5.34E-02     | CACNG6,GUCY1A1,MYL9,PDE2A,PDE5A,PRKAR2B,SLC4A10                                                               |
| 7            | Role of IL-17F in Allergic Inflammatory Airway Diseases                                               | 2.81E+00             | 9.52E-02     | CCL2,CCL4,CXCL5,CXCL8                                                                                         |
| 8            | Relaxin Signaling                                                                                     | 2.66E+00             | 4.67E-02     | GNA12,GNAZ,GUCY1A1,NFKBID,PDE2A,PDE5A,PRKAR2B                                                                 |
| 9            | Phagosome Formation                                                                                   | 2.41E+00             | 4.80E-02     | C3AR1,FCGR1A,FCGR1B,IGHG1,RHOBTB1,TLR5                                                                        |
| 10           | Role of IL-17A in Arthritis                                                                           | 2.41E+00             | 7.41E-02     | CCL2,CXCL5,CXCL8,NFKBID                                                                                       |
| 11           | Th2 Pathway                                                                                           | 2.23E+00             | 4.41E-02     | CCR3,CXCR4,CXCR6,JAK3,PTGDR2,SOCS3                                                                            |
| 12           | γ-glutamyl Cycle                                                                                      | 2.14E+00             | 1.82E-01     | GGT5,OPLAH                                                                                                    |
| 13           | IL-17A Signaling in Fibroblasts                                                                       | 2.08E+00             | 8.57E-02     | CCL2,CXCL5,NFKBID                                                                                             |
| 14           | Role of IL-17A in Psoriasis                                                                           | 2.00E+00             | 1.54E-01     | CXCL5,CXCL8                                                                                                   |
| 15           | Gustation Pathway                                                                                     | 1.98E+00             | 3.90E-02     | CACNG6,P2RY14,P2RY2,PDE2A,PDE5A,PRKAR2B                                                                       |
| 16           | Caveolar-mediated Endocytosis Signaling                                                               | 1.95E+00             | 5.48E-02     | FLNA,ITGA2B,ITGAD,ITGB3                                                                                       |
| 17           | Leukotriene Biosynthesis                                                                              | 1.93E+00             | 1.43E-01     | GGT5,LTC4S                                                                                                    |
| 18           | Sorbitol Degradation I                                                                                | 1.92E+00             | 1.00E+00     | SORD                                                                                                          |
| 19           | Histamine Biosynthesis                                                                                | 1.92E+00             | 1.00E+00     | HDC                                                                                                           |
| 20           | Calcium Signaling                                                                                     | 1.92E+00             | 3.40E-02     | CACNG6,CAMKK1,CHRFAM7A,CHRNA7,MYL9,PRKAR2B,TPM1                                                               |
| 21           | TREM1 Signaling                                                                                       | 1.91E+00             | 5.33E-02     | CCL2,CXCL8,TLR5,TREM1                                                                                         |
| 22           | Intrinsic Prothrombin Activation Pathway                                                              | 1.87E+00             | 7.14E-02     | COL10A1,F13A1,PROS1                                                                                           |
| 23           | GP6 Signaling Pathway                                                                                 | 1.85E+00             | 4.20E-02     | COL10A1,COL20A1,GP6,ITGA2B,ITGB3                                                                              |
| 24           | Role of Hypercytokinemia/hyperchemokine in the Pathogenesis of Influenza                              | 1.84E+00             | 6.98E-02     | CCL2,CCL4,CXCL8                                                                                               |
| 25           | CXCR4 Signaling                                                                                       | 1.82E+00             | 3.59E-02     | CXCR4,EGR1,GNA12,GNAZ,MYL9,RHOBTB1                                                                            |
| 26           | Extrinsic Prothrombin Activation Pathway                                                              | 1.82E+00             | 1.25E-01     | F13A1,PROS1                                                                                                   |
| 27           | Chemokine Signaling                                                                                   | 1.81E+00             | 5.00E-02     | CCL2,CCL4,CCR3,CXCR4                                                                                          |
| 28           | G-Protein Coupled Receptor Signaling                                                                  | 1.78E+00             | 2.94E-02     | ADORA3,CNR2,HTR1B,NFKBID,P2RY14,PDE2A,PDE5A,PRKAR2B                                                           |
| 29           | Th1 and Th2 Activation Pathway                                                                        | 1.77E+00             | 3.51E-02     | CCR3,CXCR4,CXCR6,JAK3,PTGDR2,SOCS3                                                                            |
| 30           | Gai Signaling                                                                                         | 1.77E+00             | 4.00E-02     | ADORA3,CNR2,HTR1B,P2RY14,PRKAR2B                                                                              |
| 31           | Differential Regulation of Cytokine Production in Macrophages and T Helper Cells by IL-17A and IL-17F | 1.72E+00             | 1.11E-01     | CCL2,CCL4                                                                                                     |
| 32           | cAMP-mediated signaling                                                                               | 1.70E+00             | 3.07E-02     | ADORA3,CNR2,HTR1B,P2RY14,PDE2A,PDE5A,PRKAR2B                                                                  |

|    |                                                                                                    |          |          |                                                 |
|----|----------------------------------------------------------------------------------------------------|----------|----------|-------------------------------------------------|
| 33 | Dendritic Cell Maturation                                                                          | 1.64E+00 | 3.28E-02 | COL10A1,FCGR1A,FCGR1B,IGHG1,IL23A,NFKBID        |
| 34 | IL-1 Signaling                                                                                     | 1.63E+00 | 4.40E-02 | GNA12,GNAZ,NFKBID,PRKAR2B                       |
| 35 | Th17 Activation Pathway                                                                            | 1.63E+00 | 4.40E-02 | DEFB131A/DEFB131B,IL23A,JAK3,SOCS3              |
| 36 | Androgen Signaling                                                                                 | 1.63E+00 | 3.68E-02 | CACNG6,GNA12,GNAZ,PRKAR2B,TGFB111               |
| 37 | Sertoli Cell-Sertoli Cell Junction Signaling                                                       | 1.62E+00 | 3.24E-02 | CLDN5,EPN2,GUCY1A1,NECTIN1,PRKAR2B,SPTB         |
| 38 | Hepatic Fibrosis / Hepatic Stellate Cell Activation                                                | 1.61E+00 | 3.23E-02 | CCL2,COL10A1,COL20A1,CXCL8,FGFR2,MYL9           |
| 39 | Phototransduction Pathway                                                                          | 1.60E+00 | 5.66E-02 | GUCY1A1,PRKAR2B,SAG                             |
| 40 | Production of Nitric Oxide and Reactive Oxygen Species in Macrophages                              | 1.59E+00 | 3.19E-02 | CAT,CLU,JAK3,NFKBID,RHOBTB1,SERPINA1            |
| 41 | Communication between Innate and Adaptive Immune Cells                                             | 1.55E+00 | 4.17E-02 | CCL4,CXCL8,IGHG1,TLR5                           |
| 42 | Differential Regulation of Cytokine Production in Intestinal Epithelial Cells by IL-17A and IL-17F | 1.52E+00 | 8.70E-02 | CCL2,CCL4                                       |
| 43 | Nitric Oxide Signaling in the Cardiovascular System                                                | 1.51E+00 | 4.04E-02 | GUCY1A1,PDE2A,PDE5A,PRKAR2B                     |
| 44 | Role of Macrophages, Fibroblasts and Endothelial Cells in Rheumatoid Arthritis                     | 1.47E+00 | 2.56E-02 | CCL2,CEBPE,CXCL8,FCGR1A,IGHG1,NFKBID,SOCS3,TLR5 |
| 45 | Coronavirus Pathogenesis Pathway                                                                   | 1.47E+00 | 3.33E-02 | CCL2,CXCL8,NFKBID,RPS4Y1,RPS4Y2                 |
| 46 | Biotin-carboxyl Carrier Protein Assembly                                                           | 1.45E+00 | 3.33E-01 | ACACB                                           |
| 47 | IL-17A Signaling in Airway Cells                                                                   | 1.39E+00 | 4.69E-02 | CXCL5,JAK3,NFKBID                               |
| 48 | PXR/RXR Activation                                                                                 | 1.37E+00 | 4.62E-02 | ABCC3,CYP2B6,PRKAR2B                            |
| 49 | Integrin Signaling                                                                                 | 1.37E+00 | 2.82E-02 | CTTN,ITGA2B,ITGAD,ITGB3,MYL9,RHOBTB1            |
| 50 | Eicosanoid Signaling                                                                               | 1.35E+00 | 4.55E-02 | ALOX15,LTC4S,PLAAT1                             |
