# Supplementary material for: Association between Arsenic Level, Gene Expression in Asian Population, and In Vitro Carcinogenic Bladder Tumor
Source: Hindawi journal article supplement (doi:10.1155/2022/3459855), 2022-01-01
Supplement: f7 [file 3459855.f7.pdf]

Table S6. Significant genes in Data1 (low, high concentrations) and Data2(low, medium, high concentrations), and the overlap between two (highlighted in green).

## Data1

| S.No. | Symbol       | Name                                                          | t.stat  | p.value    | X.log10.p. | FDR     | entrezgene | AffyID    | HGNC       |
|-------|--------------|---------------------------------------------------------------|---------|------------|------------|---------|------------|-----------|------------|
| 1     | ZNF799       | zinc finger protein 799                                       | -3.9684 | 0.00048108 | 3.3178     | 0.76894 | 90576      | 90576_at  | HGNC:28071 |
| 2     | ZNF141       | zinc finger protein 141                                       | -3.9182 | 0.00054926 | 3.2602     | 0.76894 | 7700       | 7700_at   | HGNC:12926 |
| 3     | EEF2K        | eukaryotic elongation factor 2 kinase                         | -3.8235 | 0.00070466 | 3.152      | 0.76894 | 29904      | 29904_at  | HGNC:24615 |
| 4     | ZBTB25       | zinc finger and BTB domain containing 25                      | -3.6507 | 0.0011065  | 2.9561     | 0.76894 | 7597       | 7597_at   | HGNC:13112 |
| 5     | ZNF440       | zinc finger protein 440                                       | -3.6391 | 0.0011403  | 2.943      | 0.76894 | 126070     | 126070_at | HGNC:20874 |
| 6     | MT1X         | metallothionein 1X                                            | 3.5451  | 0.0014544  | 2.8373     | 0.76894 | 4501       | 4501_at   | HGNC:7405  |
| 7     | LMBR1        | limb development membrane protein 1                           | -3.5332 | 0.0014997  | 2.824      | 0.76894 | 64327      | 64327_at  | HGNC:13243 |
| 8     | LRIG1        | leucine rich repeats and immunoglobulin like domains 1        | -3.52   | 0.0015514  | 2.8093     | 0.76894 | 26018      | 26018_at  | HGNC:17360 |
| 9     | FCER1G       | Fc fragment of IgE receptor Ig                                | 3.5142  | 0.001575   | 2.8027     | 0.76894 | 2207       | 2207_at   | HGNC:3611  |
| 10    | ZNF649       | zinc finger protein 649                                       | -3.4872 | 0.0016882  | 2.7726     | 0.76894 | 65251      | 65251_at  | HGNC:25741 |
| 11    | SPIC         | Spi-C transcription factor                                    | 3.4863  | 0.001692   | 2.7716     | 0.76894 | 121599     | 121599_at | HGNC:29549 |
| 12    | HEATR5B      | HEAT repeat containing 5B                                     | -3.3813 | 0.0022132  | 2.655      | 0.92199 | 54497      | 54497_at  | HGNC:29273 |
| 13    | TUBA1B       | tubulin alpha 1b                                              | 3.3314  | 0.0025127  | 2.5999     | 0.92607 | 10376      | 10376_at  | HGNC:18809 |
| 14    | CCDC144NL    | CCDC144A N-terminal pseudogene                                | -3.3189 | 0.0025935  | 2.5861     | 0.92607 | 339184     | 339184_at | HGNC:33735 |
| 15    | BACE2        | beta-secretase 2                                              | -3.221  | 0.0033204  | 2.4788     | 0.94807 | 25825      | 25825_at  | HGNC:934   |
| 16    | ZNF43        | zinc finger protein 43                                        | -3.1478 | 0.003987   | 2.3994     | 0.94807 | 7594       | 7594_at   | HGNC:13109 |
| 17    | TRAF5        | TNF receptor associated factor 5                              | -3.0832 | 0.0046806  | 2.3297     | 0.94807 | 7188       | 7188_at   | HGNC:12035 |
| 18    | GUSBP5       | GUSB pseudogene 5                                             | -3.067  | 0.0048724  | 2.3123     | 0.94807 | 441046     | 441046_at | HGNC:42319 |
| 19    | NIPSNAP3B    | nipsnap homolog 3B                                            | -3.0639 | 0.0049095  | 2.309      | 0.94807 | 55335      | 55335_at  | HGNC:23641 |
| 20    | LY96         | lymphocyte antigen 96                                         | 3.0103  | 0.0056027  | 2.2516     | 0.94807 | 23643      | 23643_at  | HGNC:17156 |
| 21    | NUP88        | nucleoporin 88                                                | -2.9758 | 0.0060961  | 2.215      | 0.94807 | 4927       | 4927_at   | HGNC:8067  |
| 22    | AP3S1        | adaptor related protein complex 3 subunit sigma 1             | 2.9652  | 0.0062558  | 2.2037     | 0.94807 | 1176       | 1176_at   | HGNC:2013  |
| 23    | PMS2P5       | PMS1 homolog 2, mismatch repair system component pseudogene 5 | -2.9592 | 0.0063482  | 2.1973     | 0.94807 | 5383       | 5383_at   | HGNC:9130  |
| 24    | ZFP30        | ZFP30 zinc finger protein                                     | -2.9573 | 0.0063777  | 2.1953     | 0.94807 | 22835      | 22835_at  | HGNC:29555 |
| 25    | TIMM29       | translocase of inner mitochondrial membrane 29                | -2.957  | 0.0063832  | 2.195      | 0.94807 | 90580      | 90580_at  | HGNC:25152 |
| 26    | ZNF780B      | zinc finger protein 780B                                      | -2.9456 | 0.0065632  | 2.1829     | 0.94807 | 163131     | 163131_at | HGNC:33109 |
| 27    | ACSS1        | acyl-CoA synthetase short chain family member 1               | -2.9284 | 0.0068436  | 2.1647     | 0.94807 | 84532      | 84532_at  | HGNC:16091 |
| 28    | MT1H         | metallothionein 1H                                            | 2.917   | 0.0070358  | 2.1527     | 0.94807 | 4496       | 4496_at   | HGNC:7400  |
| 29    | ELP1         | elongator complex protein 1                                   | -2.8896 | 0.0075183  | 2.1239     | 0.94807 | 8518       | 8518_at   | HGNC:5959  |
| 30    | <b>DDHD2</b> | DDHD domain containing 2                                      | -2.8841 | 0.0076179  | 2.1182     | 0.94807 | 23259      | 23259_at  | HGNC:29106 |
| 31    | CNR2         | cannabinoid receptor 2                                        | -2.8808 | 0.0076788  | 2.1147     | 0.94807 | 1269       | 1269_at   | HGNC:2160  |
| 32    | PEX1         | peroxisomal biogenesis factor 1                               | -2.8364 | 0.0085455  | 2.0683     | 0.94807 | 5189       | 5189_at   | HGNC:8850  |
| 33    | TAS2R20      | taste 2 receptor member 20                                    | -2.83   | 0.0086796  | 2.0615     | 0.94807 | 259295     | 259295_at | HGNC:19109 |
| 34    | SLC31A2      | solute carrier family 31 member 2                             | 2.8291  | 0.0086972  | 2.0606     | 0.94807 | 1318       | 1318_at   | HGNC:11017 |
| 35    | RTN4IP1      | reticulon 4 interacting protein 1                             | -2.8143 | 0.0090109  | 2.0452     | 0.94807 | 84816      | 84816_at  | HGNC:18647 |
| 36    | CISH         | cytokine inducible SH2 containing protein                     | 2.8109  | 0.0090858  | 2.0416     | 0.94807 | 1154       | 1154_at   | HGNC:1984  |
| 37    | PPP1R2       | protein phosphatase 1 regulatory inhibitor subunit 2          | -2.81   | 0.0091037  | 2.0408     | 0.94807 | 5504       | 5504_at   | HGNC:9288  |
| 38    | SMC6         | structural maintenance of chromosomes 6                       | -2.8053 | 0.0092083  | 2.0358     | 0.94807 | 79677      | 79677_at  | HGNC:20466 |

|    |          |                                                |         |          |        |         |           |              |            |
|----|----------|------------------------------------------------|---------|----------|--------|---------|-----------|--------------|------------|
| 39 | BTN2A1   | butyrophilin subfamily 2 member A1             | -2.7887 | 0.00958  | 2.0186 | 0.94807 | 11120     | 11120_at     | HGNC:1136  |
| 40 | ZNF841   | zinc finger protein 841                        | -2.7666 | 0.010098 | 1.9958 | 0.94807 | 284371    | 284371_at    | HGNC:27611 |
| 41 | SNX25    | sorting nexin 25                               | -2.7633 | 0.010176 | 1.9924 | 0.94807 | 83891     | 83891_at     | HGNC:21883 |
| 42 | ALCAM    | activated leukocyte cell adhesion molecule     | -2.7529 | 0.010431 | 1.9817 | 0.94807 | 214       | 214_at       | HGNC:400   |
| 43 | AKTIP    | AKT interacting protein                        | -2.7436 | 0.010665 | 1.972  | 0.94807 | 64400     | 64400_at     | HGNC:16710 |
| 44 | ATP6V0D1 | ATPase H+ transporting V0 subunit d1           | 2.7278  | 0.011071 | 1.9558 | 0.94807 | 9114      | 9114_at      | HGNC:13724 |
| 45 | LPAR4    | lysophosphatidic acid receptor 4               | 2.7241  | 0.011168 | 1.952  | 0.94807 | 2846      | 2846_at      | HGNC:4478  |
| 46 | MBD4     | methyl-CpG binding domain 4, DNA glycosylase   | -2.7227 | 0.011205 | 1.9506 | 0.94807 | 8930      | 8930_at      | HGNC:6919  |
| 47 | CARD11   | caspase recruitment domain family member 11    | -2.7158 | 0.011389 | 1.9435 | 0.94807 | 84433     | 84433_at     | HGNC:16393 |
| 48 | ZNF138   | zinc finger protein 138                        | -2.715  | 0.011412 | 1.9426 | 0.94807 | 7697      | 7697_at      | HGNC:12922 |
| 49 | POLI     | DNA polymerase iota                            | -2.6747 | 0.012545 | 1.9015 | 0.94807 | 11201     | 11201_at     | HGNC:9182  |
| 50 | MIR600HG | MIR600 host gene                               | -2.6734 | 0.012585 | 1.9001 | 0.94807 | 81571     | 81571_at     | HGNC:23642 |
| 51 | ADARB1   | adenosine deaminase RNA specific B1            | -2.6697 | 0.012695 | 1.8964 | 0.94807 | 104       | 104_at       | HGNC:226   |
| 52 | ERCC6L2  | ERCC excision repair 6 like 2                  | -2.6692 | 0.012709 | 1.8959 | 0.94807 | 375748    | 375748_at    | HGNC:26922 |
| 53 | METTL18  | methyltransferase like 18                      | -2.6675 | 0.012759 | 1.8942 | 0.94807 | 92342     | 92342_at     | HGNC:28793 |
| 54 | HIGD2A   | HIG1 hypoxia inducible domain family member 2A | 2.6597  | 0.012995 | 1.8862 | 0.94807 | 192286    | 192286_at    | HGNC:28311 |
| 55 | ZNF844   | zinc finger protein 844                        | -2.6556 | 0.013121 | 1.882  | 0.94807 | 284391    | 284391_at    | HGNC:25932 |
| 56 | TTC39B   | tetratricopeptide repeat domain 39B            | -2.6541 | 0.013166 | 1.8805 | 0.94807 | 158219    | 158219_at    | HGNC:23704 |
| 57 | NEMP2    | nuclear envelope integral membrane protein 2   | -2.6513 | 0.013254 | 1.8777 | 0.94807 | 100131211 | 100131211_at | HGNC:33700 |
| 58 | DDX55    | DEAD-box helicase 55                           | -2.6444 | 0.013467 | 1.8707 | 0.94807 | 57696     | 57696_at     | HGNC:20085 |
| 59 | SESN1    | sestrin 1                                      | -2.6368 | 0.013709 | 1.863  | 0.94807 | 27244     | 27244_at     | HGNC:21595 |
| 60 | ZBTB16   | zinc finger and BTB domain containing 16       | -2.6296 | 0.013941 | 1.8557 | 0.94807 | 7704      | 7704_at      | HGNC:12930 |
| 61 | NUP205   | nucleoporin 205                                | -2.6267 | 0.014034 | 1.8528 | 0.94807 | 23165     | 23165_at     | HGNC:18658 |
| 62 | VPS36    | vacuolar protein sorting 36 homolog            | -2.6195 | 0.014272 | 1.8455 | 0.94807 | 51028     | 51028_at     | HGNC:20312 |
| 63 | SERPING1 | serpin family G member 1                       | 2.6168  | 0.014363 | 1.8428 | 0.94807 | 710       | 710_at       | HGNC:1228  |
| 64 | ZNF506   | zinc finger protein 506                        | -2.605  | 0.01476  | 1.8309 | 0.94807 | 440515    | 440515_at    | HGNC:23780 |
| 65 | TMEM156  | transmembrane protein 156                      | -2.591  | 0.015248 | 1.8168 | 0.94807 | 80008     | 80008_at     | HGNC:26260 |
| 66 | SFMBT1   | Scm like with four mbt domains 1               | -2.5897 | 0.015294 | 1.8155 | 0.94807 | 51460     | 51460_at     | HGNC:20255 |
| 67 | KRTCAP2  | keratinocyte associated protein 2              | 2.5857  | 0.015436 | 1.8115 | 0.94807 | 200185    | 200185_at    | HGNC:28942 |
| 68 | CHMP2A   | charged multivesicular body protein 2A         | 2.5793  | 0.015665 | 1.8051 | 0.94807 | 27243     | 27243_at     | HGNC:30216 |
| 69 | PSENEN   | presenilin enhancer, gamma-secretase subunit   | 2.5734  | 0.01588  | 1.7992 | 0.94807 | 55851     | 55851_at     | HGNC:30100 |
| 70 | TP53INP1 | tumor protein p53 inducible nuclear protein 1  | -2.5588 | 0.016426 | 1.7845 | 0.94807 | 94241     | 94241_at     | HGNC:18022 |
| 71 | DOP1B    | DOP1 leucine zipper like protein B             | -2.5566 | 0.016509 | 1.7823 | 0.94807 | 9980      | 9980_at      | HGNC:1291  |
| 72 | SEMA4A   | semaphorin 4A                                  | 2.5521  | 0.01668  | 1.7778 | 0.94807 | 64218     | 64218_at     | HGNC:10729 |
| 73 | DLST     | dihydrolipoamide S-succinyltransferase         | -2.5394 | 0.017176 | 1.7651 | 0.94807 | 1743      | 1743_at      | HGNC:2911  |
| 74 | XCL1     | X-C motif chemokine ligand 1                   | 2.5393  | 0.017179 | 1.765  | 0.94807 | 6375      | 6375_at      | HGNC:10645 |
| 75 | MT2A     | metallothionein 2A                             | 2.539   | 0.017188 | 1.7648 | 0.94807 | 4502      | 4502_at      | HGNC:7406  |
| 76 | SPEF2    | sperm flagellar 2                              | -2.5359 | 0.017311 | 1.7617 | 0.94807 | 79925     | 79925_at     | HGNC:26293 |
| 77 | PATJ     | PATJ crumbs cell polarity complex component    | -2.5309 | 0.017514 | 1.7566 | 0.94807 | 10207     | 10207_at     | HGNC:28881 |
| 78 | CPSF1    | cleavage and polyadenylation specific factor 1 | -2.5302 | 0.017541 | 1.756  | 0.94807 | 29894     | 29894_at     | HGNC:2324  |
| 79 | CENPC    | centromere protein C                           | -2.528  | 0.01763  | 1.7537 | 0.94807 | 1060      | 1060_at      | HGNC:1854  |
| 80 | ZNF426   | zinc finger protein 426                        | -2.5239 | 0.017796 | 1.7497 | 0.94807 | 79088     | 79088_at     | HGNC:20725 |
| 81 | MOB4     | MOB family member 4, phocein                   | -2.5139 | 0.018207 | 1.7398 | 0.94807 | 25843     | 25843_at     | HGNC:17261 |
| 82 | RBM4B    | RNA binding motif protein 4B                   | -2.5114 | 0.01831  | 1.7373 | 0.94807 | 83759     | 83759_at     | HGNC:28842 |
| 83 | TMC6     | transmembrane channel like 6                   | -2.5092 | 0.018402 | 1.7351 | 0.94807 | 11322     | 11322_at     | HGNC:18021 |
| 84 | CBR4     | carbonyl reductase 4                           | -2.504  | 0.018625 | 1.7299 | 0.94807 | 84869     | 84869_at     | HGNC:25891 |
| 85 | HIGD1A   | HIG1 hypoxia inducible domain family member 1A | 2.5017  | 0.018723 | 1.7276 | 0.94807 | 25994     | 25994_at     | HGNC:29527 |

|     |              |                                                                         |         |          |        |         |           |              |            |
|-----|--------------|-------------------------------------------------------------------------|---------|----------|--------|---------|-----------|--------------|------------|
| 86  | TBC1D10C     | TBC1 domain family member 10C                                           | -2.4879 | 0.019318 | 1.714  | 0.94807 | 374403    | 374403_at    | HGNC:24702 |
| 87  | ZNF33A       | zinc finger protein 33A                                                 | -2.4801 | 0.019666 | 1.7063 | 0.94807 | 7581      | 7581_at      | HGNC:13096 |
| 88  | KCNQ5        | potassium voltage-gated channel subfamily Q member 5                    | -2.4756 | 0.019867 | 1.7019 | 0.94807 | 56479     | 56479_at     | HGNC:6299  |
| 89  | COBLL1       | cordons-bleu WH2 repeat protein like 1                                  | -2.4692 | 0.020159 | 1.6955 | 0.94807 | 22837     | 22837_at     | HGNC:23571 |
| 90  | DEF8         | differentially expressed in FDCP 8 homolog                              | -2.4635 | 0.020421 | 1.6899 | 0.94807 | 54849     | 54849_at     | HGNC:25969 |
| 91  | PRMT7        | protein arginine methyltransferase 7                                    | -2.4614 | 0.020517 | 1.6879 | 0.94807 | 54496     | 54496_at     | HGNC:25557 |
| 92  | RPL31        | ribosomal protein L31                                                   | -2.4581 | 0.020672 | 1.6846 | 0.94807 | 6160      | 6160_at      | HGNC:10334 |
| 93  | UFSP2        | UFM1 specific peptidase 2                                               | -2.4471 | 0.021189 | 1.6739 | 0.94807 | 55325     | 55325_at     | HGNC:25640 |
| 94  | WDSUB1       | WD repeat, sterile alpha motif and U-box domain containing 1            | -2.4389 | 0.021588 | 1.6658 | 0.94807 | 151525    | 151525_at    | HGNC:26697 |
| 95  | DIP2A        | disco interacting protein 2 homolog A                                   | -2.4342 | 0.021815 | 1.6612 | 0.94807 | 23181     | 23181_at     | HGNC:17217 |
| 96  | DZIP3        | DAZ interacting zinc finger protein 3                                   | -2.4279 | 0.02213  | 1.655  | 0.94807 | 9666      | 9666_at      | HGNC:30938 |
| 97  | TIMP1        | TIMP metalloproteinase inhibitor 1                                      | 2.4241  | 0.022321 | 1.6513 | 0.94807 | 7076      | 7076_at      | HGNC:11820 |
| 98  | ZBED5        | zinc finger BED-type containing 5                                       | -2.4226 | 0.022396 | 1.6498 | 0.94807 | 58486     | 58486_at     | HGNC:30803 |
| 99  | ARHGEF18     | Rho/Rac guanine nucleotide exchange factor 18                           | -2.414  | 0.022831 | 1.6415 | 0.94807 | 23370     | 23370_at     | HGNC:17090 |
| 100 | RPL32        | ribosomal protein L32                                                   | -2.4128 | 0.022895 | 1.6403 | 0.94807 | 6161      | 6161_at      | HGNC:10336 |
| 101 | SLC38A11     | solute carrier family 38 member 11                                      | -2.4122 | 0.022926 | 1.6397 | 0.94807 | 151258    | 151258_at    | HGNC:26836 |
| 102 | CRYGS        | crystallin gamma S                                                      | -2.4038 | 0.023359 | 1.6315 | 0.94807 | 1427      | 1427_at      | HGNC:2417  |
| 103 | AIM2         | absent in melanoma 2                                                    | -2.4026 | 0.023424 | 1.6303 | 0.94807 | 9447      | 9447_at      | HGNC:357   |
| 104 | EFCAB7       | EF-hand calcium binding domain 7                                        | -2.388  | 0.024199 | 1.6162 | 0.94807 | 84455     | 84455_at     | HGNC:29379 |
| 105 | RRP15        | ribosomal RNA processing 15 homolog                                     | -2.3875 | 0.024229 | 1.6157 | 0.94807 | 51018     | 51018_at     | HGNC:24255 |
| 106 | SNORA44      | small nucleolar RNA, H/ACA box 44                                       | -2.3825 | 0.024499 | 1.6109 | 0.94807 | 677825    | 677825_at    | HGNC:32637 |
| 107 | ZNF510       | zinc finger protein 510                                                 | -2.3822 | 0.024513 | 1.6106 | 0.94807 | 22869     | 22869_at     | HGNC:29161 |
| 108 | PAPSS2       | 3'-phosphoadenosine 5'-phosphosulfate synthase 2                        | 2.3779  | 0.02475  | 1.6064 | 0.94807 | 9060      | 9060_at      | HGNC:8604  |
| 109 | SNORA14A     | small nucleolar RNA, H/ACA box 14A                                      | -2.3756 | 0.02488  | 1.6042 | 0.94807 | 677801    | 677801_at    | HGNC:32602 |
| 110 | LOC100128398 | uncharacterized LOC100128398                                            | -2.3741 | 0.024961 | 1.6027 | 0.94807 | 100128398 | 100128398_at |            |
| 111 | YBEY         | ybeY metalloendonuclease                                                | -2.3683 | 0.025284 | 1.5972 | 0.94807 | 54059     | 54059_at     | HGNC:1299  |
| 112 | MFS1         | major facilitator superfamily domain containing 1                       | 2.3654  | 0.02545  | 1.5943 | 0.94807 | 64747     | 64747_at     | HGNC:25874 |
| 113 | RPL8         | ribosomal protein L8                                                    | -2.3643 | 0.02551  | 1.5933 | 0.94807 | 6132      | 6132_at      | HGNC:10368 |
| 114 | GCNT2        | glucosaminyl (N-acetyl) transferase 2 (I blood group)                   | -2.3605 | 0.025728 | 1.5896 | 0.94807 | 2651      | 2651_at      | HGNC:4204  |
| 115 | JUP          | junction plakoglobin                                                    | 2.3605  | 0.025729 | 1.5896 | 0.94807 | 3728      | 3728_at      | HGNC:6207  |
| 116 | IFT80        | intraflagellar transport 80                                             | -2.3572 | 0.025921 | 1.5864 | 0.94807 | 57560     | 57560_at     | HGNC:29262 |
| 117 | PIK3C2B      | phosphatidylinositol-4-phosphate 3-kinase catalytic subunit type 2 beta | -2.3569 | 0.025934 | 1.5861 | 0.94807 | 5287      | 5287_at      | HGNC:8972  |
| 118 | DIS3L        | DIS3 like exosome 3'-5' exoribonuclease                                 | -2.3528 | 0.026172 | 1.5822 | 0.94807 | 115752    | 115752_at    | HGNC:28698 |
| 119 | S100A4       | S100 calcium binding protein A4                                         | 2.3512  | 0.026264 | 1.5806 | 0.94807 | 6275      | 6275_at      | HGNC:10494 |
| 120 | FAM149B1     | family with sequence similarity 149 member B1                           | -2.3508 | 0.026288 | 1.5802 | 0.94807 | 317662    | 317662_at    | HGNC:29162 |
| 121 | ZFP14        | ZFP14 zinc finger protein                                               | -2.3467 | 0.026526 | 1.5763 | 0.94807 | 57677     | 57677_at     | HGNC:29312 |
| 122 | SLC15A4      | solute carrier family 15 member 4                                       | 2.344   | 0.026688 | 1.5737 | 0.94807 | 121260    | 121260_at    | HGNC:23090 |
| 123 | SMIM3        | small integral membrane protein 3                                       | 2.3391  | 0.026977 | 1.569  | 0.94807 | 85027     | 85027_at     | HGNC:30248 |
| 124 | MRPS17       | mitochondrial ribosomal protein S17                                     | 2.3247  | 0.027851 | 1.5552 | 0.94807 | 51373     | 51373_at     | HGNC:14047 |
| 125 | TNFRSF13B    | TNF receptor superfamily member 13B                                     | -2.3236 | 0.027919 | 1.5541 | 0.94807 | 23495     | 23495_at     | HGNC:18153 |
| 126 | LY6E         | lymphocyte antigen 6 family member E                                    | 2.3209  | 0.028088 | 1.5515 | 0.94807 | 4061      | 4061_at      | HGNC:6727  |
| 127 | ENPP3        | ectonucleotide pyrophosphatase/phosphodiesterase 3                      | -2.3185 | 0.028236 | 1.5492 | 0.94807 | 5169      | 5169_at      | HGNC:3358  |
| 128 | ZNF224       | zinc finger protein 224                                                 | -2.317  | 0.028328 | 1.5478 | 0.94807 | 7767      | 7767_at      | HGNC:13017 |
| 129 | ZNF302       | zinc finger protein 302                                                 | -2.3162 | 0.028377 | 1.547  | 0.94807 | 55900     | 55900_at     | HGNC:13848 |
| 130 | LIPA         | lipase A, lysosomal acid type                                           | 2.3149  | 0.028463 | 1.5457 | 0.94807 | 3988      | 3988_at      | HGNC:6617  |

|     |          |                                                          |         |          |        |         |        |           |            |
|-----|----------|----------------------------------------------------------|---------|----------|--------|---------|--------|-----------|------------|
| 131 | NCAPD3   | non-SMC condensin II complex subunit D3                  | -2.3116 | 0.028666 | 1.5426 | 0.94807 | 23310  | 23310_at  | HGNC:28952 |
| 132 | ZDHC23   | zinc finger DHHC-type palmitoyltransferase 23            | -2.3005 | 0.029375 | 1.532  | 0.94807 | 254887 | 254887_at | HGNC:28654 |
| 133 | NDUFAF6  | NADH:ubiquinone oxidoreductase complex assembly factor 6 | -2.3001 | 0.029404 | 1.5316 | 0.94807 | 137682 | 137682_at | HGNC:28625 |
| 134 | SNORD29  | small nucleolar RNA, C/D box 29                          | -2.2957 | 0.029688 | 1.5274 | 0.94807 | 9297   | 9297_at   | HGNC:10151 |
| 135 | GORAB    | golgin, RAB6 interacting                                 | -2.2944 | 0.029771 | 1.5262 | 0.94807 | 92344  | 92344_at  | HGNC:25676 |
| 136 | KAT2A    | lysine acetyltransferase 2A                              | -2.294  | 0.029795 | 1.5259 | 0.94807 | 2648   | 2648_at   | HGNC:4201  |
| 137 | ZNF33B   | zinc finger protein 33B                                  | -2.2933 | 0.029843 | 1.5252 | 0.94807 | 7582   | 7582_at   | HGNC:13097 |
| 138 | ATP10D   | ATPase phospholipid transporting 10D (putative)          | -2.2907 | 0.030016 | 1.5226 | 0.94807 | 57205  | 57205_at  | HGNC:13549 |
| 139 | TAS2R19  | taste 2 receptor member 19                               | -2.2895 | 0.030095 | 1.5215 | 0.94807 | 259294 | 259294_at | HGNC:19108 |
| 140 | CLUAP1   | clusterin associated protein 1                           | -2.288  | 0.030191 | 1.5201 | 0.94807 | 23059  | 23059_at  | HGNC:19009 |
| 141 | FLNB     | filamin B                                                | -2.2856 | 0.030354 | 1.5178 | 0.94807 | 2317   | 2317_at   | HGNC:3755  |
| 142 | GGTA1P   | glycoprotein alpha-galactosyltransferase 1, pseudogene   | 2.2814  | 0.030628 | 1.5139 | 0.94807 | 2681   | 2681_at   | HGNC:4253  |
| 143 | SLC4A10  | solute carrier family 4 member 10                        | -2.2791 | 0.030785 | 1.5117 | 0.94807 | 57282  | 57282_at  | HGNC:13811 |
| 144 | ATG14    | autophagy related 14                                     | -2.2766 | 0.030957 | 1.5092 | 0.94807 | 22863  | 22863_at  | HGNC:19962 |
| 145 | HNRNPH1  | heterogeneous nuclear ribonucleoprotein H1               | -2.2754 | 0.031033 | 1.5082 | 0.94807 | 3187   | 3187_at   | HGNC:5041  |
| 146 | CTSS     | cathepsin S                                              | 2.2753  | 0.031041 | 1.5081 | 0.94807 | 1520   | 1520_at   | HGNC:2545  |
| 147 | PSIP1    | PC4 and SFRS1 interacting protein 1                      | -2.2728 | 0.031214 | 1.5057 | 0.94807 | 11168  | 11168_at  | HGNC:9527  |
| 148 | NR2C1    | nuclear receptor subfamily 2 group C member 1            | -2.2726 | 0.031228 | 1.5055 | 0.94807 | 7181   | 7181_at   | HGNC:7971  |
| 149 | TTC13    | tetratricopeptide repeat domain 13                       | -2.2684 | 0.031512 | 1.5015 | 0.94807 | 79573  | 79573_at  | HGNC:26204 |
| 150 | DTX1     | deltex E3 ubiquitin ligase 1                             | -2.2681 | 0.031534 | 1.5012 | 0.94807 | 1840   | 1840_at   | HGNC:3060  |
| 151 | NT5E     | 5'-nucleotidase ecto                                     | -2.2665 | 0.031647 | 1.4997 | 0.94807 | 4907   | 4907_at   | HGNC:8021  |
| 152 | LY6G5C   | lymphocyte antigen 6 family member G5C                   | 2.2626  | 0.031912 | 1.496  | 0.94807 | 80741  | 80741_at  | HGNC:13932 |
| 153 | ZNF767P  | zinc finger family member 767, pseudogene                | -2.2578 | 0.03225  | 1.4915 | 0.94807 | 79970  | 79970_at  | HGNC:21884 |
| 154 | SNHG32   | small nucleolar RNA host gene 32                         | -2.2573 | 0.032284 | 1.491  | 0.94807 | 50854  | 50854_at  | HGNC:19078 |
| 155 | ZNF160   | zinc finger protein 160                                  | -2.2543 | 0.032499 | 1.4881 | 0.94807 | 90338  | 90338_at  | HGNC:12948 |
| 156 | INTS4    | integrator complex subunit 4                             | -2.2535 | 0.032551 | 1.4874 | 0.94807 | 92105  | 92105_at  | HGNC:25048 |
| 157 | AQP10    | aquaporin 10                                             | 2.2533  | 0.03257  | 1.4872 | 0.94807 | 89872  | 89872_at  | HGNC:16029 |
| 158 | CERK     | ceramide kinase                                          | -2.2514 | 0.032701 | 1.4854 | 0.94807 | 64781  | 64781_at  | HGNC:19256 |
| 159 | HAPLN3   | hyaluronan and proteoglycan link protein 3               | -2.246  | 0.033089 | 1.4803 | 0.94807 | 145864 | 145864_at | HGNC:21446 |
| 160 | ACVR1C   | activin A receptor type 1C                               | -2.2451 | 0.033156 | 1.4794 | 0.94807 | 130399 | 130399_at | HGNC:18123 |
| 161 | UPF3A    | UPF3A regulator of nonsense mediated mRNA decay          | -2.2426 | 0.033331 | 1.4772 | 0.94807 | 65110  | 65110_at  | HGNC:20332 |
| 162 | CCDC14   | coiled-coil domain containing 14                         | -2.2403 | 0.033504 | 1.4749 | 0.94807 | 64770  | 64770_at  | HGNC:25766 |
| 163 | EMP3     | epithelial membrane protein 3                            | 2.2353  | 0.033868 | 1.4702 | 0.94807 | 2014   | 2014_at   | HGNC:3335  |
| 164 | C11orf65 | chromosome 11 open reading frame 65                      | -2.235  | 0.033887 | 1.47   | 0.94807 | 160140 | 160140_at | HGNC:28519 |
| 165 | RAB6B    | RAB6B, member RAS oncogene family                        | 2.2311  | 0.034174 | 1.4663 | 0.94807 | 51560  | 51560_at  | HGNC:14902 |
| 166 | PDPR     | pyruvate dehydrogenase phosphatase regulatory subunit    | 2.2302  | 0.034242 | 1.4654 | 0.94807 | 55066  | 55066_at  | HGNC:30264 |
| 167 | ZNF678   | zinc finger protein 678                                  | -2.2297 | 0.034276 | 1.465  | 0.94807 | 339500 | 339500_at | HGNC:28652 |
| 168 | FAM169A  | family with sequence similarity 169 member A             | -2.2263 | 0.034531 | 1.4618 | 0.94807 | 26049  | 26049_at  | HGNC:29138 |
| 169 | SGCE     | sarcoglycan epsilon                                      | -2.2236 | 0.034732 | 1.4593 | 0.94807 | 8910   | 8910_at   | HGNC:10808 |
| 170 | PSPH     | phosphoserine phosphatase                                | -2.2199 | 0.035013 | 1.4558 | 0.94807 | 5723   | 5723_at   | HGNC:9577  |
| 171 | SUDS3    | SDS3 homolog, SIN3A corepressor complex component        | -2.2089 | 0.035857 | 1.4454 | 0.94807 | 64426  | 64426_at  | HGNC:29545 |
| 172 | ANKLE2   | ankyrin repeat and LEM domain containing 2               | -2.2068 | 0.036013 | 1.4435 | 0.94807 | 23141  | 23141_at  | HGNC:29101 |
| 173 | LGALS1   | galectin 1                                               | 2.2046  | 0.036185 | 1.4415 | 0.94807 | 3956   | 3956_at   | HGNC:6561  |
| 174 | MT1F     | metallothionein 1F                                       | 2.2038  | 0.036251 | 1.4407 | 0.94807 | 4494   | 4494_at   | HGNC:7398  |
| 175 | SMAD5    | SMAD family member 5                                     | -2.2036 | 0.036263 | 1.4405 | 0.94807 | 4090   | 4090_at   | HGNC:6771  |
| 176 | ABCA5    | ATP binding cassette subfamily A member 5                | -2.2024 | 0.036356 | 1.4394 | 0.94807 | 23461  | 23461_at  | HGNC:35    |

|     |           |                                                                     |         |          |        |         |        |           |            |
|-----|-----------|---------------------------------------------------------------------|---------|----------|--------|---------|--------|-----------|------------|
| 177 | ZNF808    | zinc finger protein 808                                             | -2.2023 | 0.036364 | 1.4393 | 0.94807 | 388558 | 388558_at | HGNC:33230 |
| 178 | BTA1F1    | B-TFIID TATA-box binding protein associated factor 1                | -2.2003 | 0.036521 | 1.4375 | 0.94807 | 9044   | 9044_at   | HGNC:17307 |
| 179 | PTGDS     | prostaglandin D2 synthase                                           | -2.1973 | 0.036756 | 1.4347 | 0.94807 | 5730   | 5730_at   | HGNC:9592  |
| 180 | CABP5     | calcium binding protein 5                                           | 2.1969  | 0.036793 | 1.4342 | 0.94807 | 56344  | 56344_at  | HGNC:13714 |
| 181 | ZNF75A    | zinc finger protein 75a                                             | -2.1948 | 0.036961 | 1.4323 | 0.94807 | 7627   | 7627_at   | HGNC:13146 |
| 182 | RAD54B    | RAD54 homolog B                                                     | -2.1945 | 0.036978 | 1.4321 | 0.94807 | 25788  | 25788_at  | HGNC:17228 |
| 183 | CCDC122   | coiled-coil domain containing 122                                   | 2.1944  | 0.036989 | 1.4319 | 0.94807 | 160857 | 160857_at | HGNC:26478 |
| 184 | ZNF286A   | zinc finger protein 286A                                            | -2.1851 | 0.037731 | 1.4233 | 0.94807 | 57335  | 57335_at  | HGNC:13501 |
| 185 | OSGEPL1   | O-sialoglycoprotein endopeptidase like 1                            | -2.1847 | 0.037767 | 1.4229 | 0.94807 | 64172  | 64172_at  | HGNC:23075 |
| 186 | KLF13     | Kruppel like factor 13                                              | -2.1819 | 0.037991 | 1.4203 | 0.94807 | 51621  | 51621_at  | HGNC:13672 |
| 187 | KLHDC2    | kelch domain containing 2                                           | -2.1802 | 0.038132 | 1.4187 | 0.94807 | 23588  | 23588_at  | HGNC:20231 |
| 188 | ZNF121    | zinc finger protein 121                                             | -2.1795 | 0.038188 | 1.4181 | 0.94807 | 7675   | 7675_at   | HGNC:12904 |
| 189 | PLCG1     | phospholipase C gamma 1                                             | -2.1737 | 0.038669 | 1.4126 | 0.94807 | 5335   | 5335_at   | HGNC:9065  |
| 190 | IFI30     | IFI30 lysosomal thiol reductase                                     | 2.1659  | 0.039315 | 1.4054 | 0.94807 | 10437  | 10437_at  | HGNC:5398  |
| 191 | GTPBP6    | GTP binding protein 6 (putative)                                    | -2.1628 | 0.039579 | 1.4025 | 0.94807 | 8225   | 8225_at   | HGNC:30189 |
| 192 | RAB31     | RAB31, member RAS oncogene family                                   | 2.1602  | 0.039799 | 1.4001 | 0.94807 | 11031  | 11031_at  | HGNC:9771  |
| 193 | LMO7      | LIM domain 7                                                        | -2.1594 | 0.039865 | 1.3994 | 0.94807 | 4008   | 4008_at   | HGNC:6646  |
| 194 | GRAMD1C   | GRAM domain containing 1C                                           | -2.1593 | 0.039876 | 1.3993 | 0.94807 | 54762  | 54762_at  | HGNC:25252 |
| 195 | TAS2R14   | taste 2 receptor member 14                                          | -2.1592 | 0.039879 | 1.3993 | 0.94807 | 50840  | 50840_at  | HGNC:14920 |
| 196 | TAS2R10   | taste 2 receptor member 10                                          | -2.1587 | 0.039921 | 1.3988 | 0.94807 | 50839  | 50839_at  | HGNC:14918 |
| 197 | ZNF234    | zinc finger protein 234                                             | -2.15   | 0.040668 | 1.3908 | 0.94807 | 10780  | 10780_at  | HGNC:13027 |
| 198 | PPDPF     | pancreatic progenitor cell differentiation and proliferation factor | 2.1459  | 0.041027 | 1.3869 | 0.94807 | 79144  | 79144_at  | HGNC:16142 |
| 199 | CCR3      | C-C motif chemokine receptor 3                                      | -2.1419 | 0.041374 | 1.3833 | 0.94807 | 1232   | 1232_at   | HGNC:1604  |
| 200 | EBPL      | EBP like                                                            | -2.1336 | 0.042113 | 1.3756 | 0.94807 | 84650  | 84650_at  | HGNC:18061 |
| 201 | CXCL16    | C-X-C motif chemokine ligand 16                                     | 2.13    | 0.042438 | 1.3722 | 0.94807 | 58191  | 58191_at  | HGNC:16642 |
| 202 | ATP6V0B   | ATPase H+ transporting V0 subunit b                                 | 2.1288  | 0.042541 | 1.3712 | 0.94807 | 533    | 533_at    | HGNC:861   |
| 203 | HLA-F-AS1 | HLA-F antisense RNA 1                                               | -2.1279 | 0.042624 | 1.3703 | 0.94807 | 285830 | 285830_at | HGNC:26645 |
| 204 | HIP1      | huntingtin interacting protein 1                                    | -2.1214 | 0.043213 | 1.3644 | 0.94807 | 3092   | 3092_at   | HGNC:4913  |
| 205 | ITPR1     | inositol 1,4,5-trisphosphate receptor type 1                        | -2.1203 | 0.043318 | 1.3633 | 0.94807 | 3708   | 3708_at   | HGNC:6180  |
| 206 | BTN2A2    | butyrophilin subfamily 2 member A2                                  | -2.1199 | 0.043349 | 1.363  | 0.94807 | 10385  | 10385_at  | HGNC:1137  |
| 207 | MYADM     | myeloid associated differentiation marker                           | 2.1194  | 0.0434   | 1.3625 | 0.94807 | 91663  | 91663_at  | HGNC:7544  |
| 208 | GAA       | glucosidase alpha, acid                                             | 2.119   | 0.043435 | 1.3622 | 0.94807 | 2548   | 2548_at   | HGNC:4065  |
| 209 | PHTF2     | putative homeodomain transcription factor 2                         | -2.1187 | 0.043458 | 1.3619 | 0.94807 | 57157  | 57157_at  | HGNC:13411 |
| 210 | CD163     | CD163 molecule                                                      | 2.1146  | 0.043837 | 1.3582 | 0.94807 | 9332   | 9332_at   | HGNC:1631  |
| 211 | ABI3      | ABI family member 3                                                 | 2.1138  | 0.043915 | 1.3574 | 0.94807 | 51225  | 51225_at  | HGNC:29859 |
| 212 | PAN2      | poly(A) specific ribonuclease subunit PAN2                          | -2.1125 | 0.044036 | 1.3562 | 0.94807 | 9924   | 9924_at   | HGNC:20074 |
| 213 | C1QB      | complement C1q B chain                                              | 2.1104  | 0.044225 | 1.3543 | 0.94807 | 713    | 713_at    | HGNC:1242  |
| 214 | DGKD      | diacylglycerol kinase delta                                         | -2.1085 | 0.044407 | 1.3526 | 0.94807 | 8527   | 8527_at   | HGNC:2851  |
| 215 | C18orf54  | chromosome 18 open reading frame 54                                 | -2.1027 | 0.044957 | 1.3472 | 0.94807 | 162681 | 162681_at | HGNC:13796 |
| 216 | DNAJC10   | DnaJ heat shock protein family (Hsp40) member C10                   | -2.1011 | 0.045101 | 1.3458 | 0.94807 | 54431  | 54431_at  | HGNC:24637 |
| 217 | C9orf40   | chromosome 9 open reading frame 40                                  | -2.1008 | 0.04513  | 1.3455 | 0.94807 | 55071  | 55071_at  | HGNC:23433 |
| 218 | XCL2      | X-C motif chemokine ligand 2                                        | -2.1007 | 0.04514  | 1.3454 | 0.94807 | 6846   | 6846_at   | HGNC:10646 |
| 219 | PIGT      | phosphatidylinositol glycan anchor biosynthesis class T             | 2.0918  | 0.045998 | 1.3373 | 0.94807 | 51604  | 51604_at  | HGNC:14938 |
| 220 | HERC2     | HECT and RLD domain containing E3 ubiquitin protein ligase 2        | -2.0857 | 0.046584 | 1.3318 | 0.94807 | 8924   | 8924_at   | HGNC:4868  |
| 221 | ATP6V1F   | ATPase H+ transporting V1 subunit F                                 | 2.0852  | 0.046633 | 1.3313 | 0.94807 | 9296   | 9296_at   | HGNC:16832 |

|     |          |                                                        |         |          |        |         |        |           |            |
|-----|----------|--------------------------------------------------------|---------|----------|--------|---------|--------|-----------|------------|
| 222 | LIMS1    | LIM zinc finger domain containing 1                    | 2.0827  | 0.046882 | 1.329  | 0.94807 | 3987   | 3987_at   | HGNC:6616  |
| 223 | C12orf65 | chromosome 12 open reading frame 65                    | -2.0815 | 0.046995 | 1.328  | 0.94807 | 91574  | 91574_at  | HGNC:26784 |
| 224 | ZFP28    | ZFP28 zinc finger protein                              | -2.0782 | 0.047324 | 1.3249 | 0.94807 | 140612 | 140612_at | HGNC:17801 |
| 225 | ADCY10P1 | ADCY10 pseudogene 1                                    | -2.0724 | 0.047899 | 1.3197 | 0.94807 | 221442 | 221442_at | HGNC:44143 |
| 226 | HS3ST1   | heparan sulfate-glucosamine 3-sulfotransferase 1       | -2.0718 | 0.047966 | 1.3191 | 0.94807 | 9957   | 9957_at   | HGNC:5194  |
| 227 | NHEJ1    | non-homologous end joining factor 1                    | -2.0677 | 0.048377 | 1.3154 | 0.94807 | 79840  | 79840_at  | HGNC:25737 |
| 228 | ZNF251   | zinc finger protein 251                                | -2.0664 | 0.048504 | 1.3142 | 0.94807 | 90987  | 90987_at  | HGNC:13045 |
| 229 | IL4R     | interleukin 4 receptor                                 | -2.0659 | 0.048554 | 1.3138 | 0.94807 | 3566   | 3566_at   | HGNC:6015  |
| 230 | ZNF836   | zinc finger protein 836                                | -2.0571 | 0.049456 | 1.3058 | 0.94807 | 162962 | 162962_at | HGNC:34333 |
| 231 | CRIM1    | cysteine rich transmembrane BMP regulator 1            | -2.0559 | 0.04958  | 1.3047 | 0.94807 | 51232  | 51232_at  | HGNC:2359  |
| 232 | JUNB     | JunB proto-oncogene, AP-1 transcription factor subunit | 2.0559  | 0.049581 | 1.3047 | 0.94807 | 3726   | 3726_at   | HGNC:6205  |

## Data2

| S.No. | Symbol       | LOCUSLINK_ID | f.value | p.value  | X.log10.p. | FDR        | Fisher.s.LSD                               | GB_ACC       | Description                                                                                           |
|-------|--------------|--------------|---------|----------|------------|------------|--------------------------------------------|--------------|-------------------------------------------------------------------------------------------------------|
| 1     | PP12719      | NA           | 20.962  | 1.83E-07 | 6.7374     | 0.00091518 | High - Low; High - Medium;<br>Medium - Low | XM_003403527 | Homo sapiens ubiquitin specific peptidase 9, Y-linked (USP9Y), mRNA [NM_004654]                       |
| 2     | MALAT1       | NA           | 18.85   | 6.17E-07 | 6.2094     | 0.0015433  | Low - High; Medium - High;<br>Low - Medium | NR_002819    | Homo sapiens taxilin gamma 2, pseudogene (TXLNG2P), transcript variant 1, non-coding RNA [NR_045128]  |
| 3     | MALAT1       | NA           | 17.04   | 1.83E-06 | 5.7372     | 0.0030522  | Low - High; Medium - High;<br>Low - Medium | NR_002819    | Homo sapiens taxilin gamma 2, pseudogene (TXLNG2P), transcript variant 2, non-coding RNA [NR_045129]  |
| 4     | LOC100506930 | NA           | 14.838  | 7.32E-06 | 5.1356     | 0.0081549  | Low - High; Medium - High;<br>Low - Medium | NR_038279    | Homo sapiens X (inactive)-specific transcript (non-protein coding) (XIST), non-coding RNA [NR_001564] |
| 5     | PTGS2        | 5743         | 14.67   | 8.16E-06 | 5.0885     | 0.0081549  | Low - High; Medium - High;<br>Low - Medium | NM_000963    | Homo sapiens eukaryotic translation initiation factor 1A, Y-linked (EIF1AY), mRNA [NM_004681]         |
| 6     | SFN          | 2810         | 14.251  | 1.07E-05 | 4.9698     | 0.0089317  | Low - High; High - Medium;<br>Low - Medium | NM_006142    | BROAD Institute lincRNA (XLOC_008323), lincRNA [TCONS_00017647]                                       |
| 7     | XLOC_012515  | NA           | 13.839  | 1.41E-05 | 4.8522     | 0.010038   | High - Low; High - Medium;<br>Medium - Low |              | Homo sapiens X (inactive)-specific transcript (non-protein coding) (XIST), non-coding RNA [NR_001564] |

|    |                |    |        |        |            |        |          |                                            |           |                                                                                                                               |
|----|----------------|----|--------|--------|------------|--------|----------|--------------------------------------------|-----------|-------------------------------------------------------------------------------------------------------------------------------|
| 8  | LOC100507254   | NA |        | 12.102 | 4.54E-05   | 4.3425 | 0.028398 | Low - High; Medium - High;<br>Medium - Low | NR_038981 | Homo sapiens X (inactive)-<br>specific transcript (non-protein<br>coding) (XIST), non-coding<br>RNA [NR_001564]               |
| 9  | IL8            |    | 3576   | 11.438 | 7.22E-05   | 4.1417 | 0.040085 | Low - High; Medium - High;<br>Low - Medium |           | Homo sapiens X (inactive)-<br>specific transcript (non-protein<br>coding) (XIST), non-coding<br>RNA [NR_001564]               |
| 10 | EGR2           |    | 1959   | 11.049 | 9.50E-05   | 4.0225 | 0.047467 | Low - High; Medium - High;<br>Low - Medium | NM_000399 | Homo sapiens lysine (K)-<br>specific demethylase 5D<br>(KDM5D), transcript variant 2,<br>mRNA [NM_004653]                     |
| 11 | SHISA4         |    | 149345 | 10.643 | 0.00012688 | 3.8966 | 0.0536   | Low - High; High - Medium;<br>Low - Medium | NM_198149 | Homo sapiens X (inactive)-<br>specific transcript (non-protein<br>coding) (XIST), non-coding<br>RNA [NR_001564]               |
| 12 | C9orf40        |    | 55071  | 10.623 | 0.00012867 | 3.8905 | 0.0536   | High - Low; High - Medium;<br>Medium - Low | NM_017998 | Homo sapiens X (inactive)-<br>specific transcript (non-protein<br>coding) (XIST), non-coding<br>RNA [NR_001564]               |
| 13 | XLOC_000683    | NA |        | 9.7984 | 0.00023413 | 3.6306 | 0.087545 | High - Low; High - Medium;<br>Medium - Low |           | Homo sapiens ribosomal<br>protein S4, Y-linked 1<br>(RPS4Y1), mRNA [NM_001008]                                                |
| 14 | BMS1P5         | NA |        | 9.6385 | 0.00026334 | 3.5795 | 0.087545 | Low - High; Medium - High;<br>Low - Medium | BC065722  | PREDICTED: Homo sapiens<br>gamma-taxilin-like<br>(LOC100509121), mRNA<br>[XM_003120334]                                       |
| 15 | PSPH           |    | 5723   | 9.5717 | 0.00027663 | 3.5581 | 0.087545 | High - Low; Medium - High;<br>Medium - Low | NM_004577 | ubiquitously transcribed<br>tetratricopeptide repeat gene,<br>Y-linked [Source:HGNC<br>Symbol;Acc:12638]<br>[ENST00000382893] |
| 16 | DSP            |    | 1832   | 9.4438 | 0.00030408 | 3.517  | 0.087545 | Low - High; Medium - High;<br>Medium - Low | NM_004415 | PREDICTED: Homo sapiens<br>hypothetical protein<br>LOC100653022<br>(LOC100653022), mRNA<br>[XM_003403527]                     |
| 17 | XLOC_012515    | NA |        | 9.4428 | 0.0003043  | 3.5167 | 0.087545 | High - Low; High - Medium;<br>Medium - Low |           | Homo sapiens ribosomal<br>protein S4, Y-linked 2<br>(RPS4Y2), mRNA<br>[NM_001039567]                                          |
| 18 | XLOC_I2_015178 | NA |        | 9.3824 | 0.00031823 | 3.4973 | 0.087545 | Low - High; Medium - High;<br>Medium - Low | CB121594  | Homo sapiens X (inactive)-<br>specific transcript (non-protein<br>coding) (XIST), non-coding<br>RNA [NR_001564]               |

|    |           |    |        |        |            |        |          |                                            |              |                                                                                                                               |
|----|-----------|----|--------|--------|------------|--------|----------|--------------------------------------------|--------------|-------------------------------------------------------------------------------------------------------------------------------|
| 19 | G0S2      |    | 50486  | 9.2946 | 0.0003397  | 3.4689 | 0.087545 | Low - High; Medium - High;<br>Low - Medium | NM_015714    | BROAD Institute lincRNA (XLOC_008015), lincRNA [TCONS_00017433]                                                               |
| 20 | IL8       |    | 3576   | 9.2535 | 0.00035025 | 3.4556 | 0.087545 | Low - High; High - Medium;<br>Low - Medium | NM_000584    | Homo sapiens non-protein coding RNA 185 (NCRNA00185), non-coding RNA [NR_001544]                                              |
| 21 | PHACTR1   |    | 221692 | 9.0622 | 0.00040403 | 3.3936 | 0.092589 | Low - High; Medium - High;<br>Low - Medium | AB051520     | Homo sapiens ubiquitously transcribed tetratricopeptide repeat gene, Y-linked (UTY), transcript variant 3, mRNA [NM_007125]   |
| 22 | LOC643072 | NA |        | 8.9788 | 0.00043009 | 3.3664 | 0.092589 | High - Low; High - Medium;<br>Medium - Low | XR_108434    | Homo sapiens DEAD (Asp-Glu-Ala-Asp) box polypeptide 3, Y-linked (DDX3Y), transcript variant 1, mRNA [NM_001122665]            |
| 23 | FOS       |    | 2353   | 8.9515 | 0.000439   | 3.3575 | 0.092589 | Low - High; Medium - High;<br>Low - Medium | NM_005252    | Homo sapiens metastasis associated lung adenocarcinoma transcript 1 (non-protein coding) (MALAT1), non-coding RNA [NR_002819] |
| 24 | PIK3R6    |    | 146850 | 8.9349 | 0.00044452 | 3.3521 | 0.092589 | High - Low; Medium - High;<br>Medium - Low | NM_001010855 | Homo sapiens eukaryotic translation initiation factor 1A, Y-linked (EIF1AY), mRNA [NM_004681]                                 |
| 25 | UTY       |    | 7404   | 8.7449 | 0.0005129  | 3.29   | 0.10067  | Low - High; Medium - High;<br>Low - Medium | BC012581     | Homo sapiens metastasis associated lung adenocarcinoma transcript 1 (non-protein coding) (MALAT1), non-coding RNA [NR_002819] |
| 26 | BAMBI     |    | 25805  | 8.6696 | 0.00054295 | 3.2652 | 0.10067  | High - Low; Medium - High;<br>Medium - Low | NM_012342    | BROAD Institute lincRNA (XLOC_008276), lincRNA [TCONS_00017607]                                                               |
| 27 | DOCK9     |    | 23348  | 8.6678 | 0.00054372 | 3.2646 | 0.10067  | Low - High; High - Medium;<br>Low - Medium | AK090793     | Homo sapiens uncharacterized LOC100506930 (LOC100506930), transcript variant 2, non-coding RNA [NR_038279]                    |
| 28 | LOC643802 | NA |        | 8.3896 | 0.0006717  | 3.1728 | 0.1191   | High - Low; High - Medium;<br>Medium - Low | BX537874     | Homo sapiens protein kinase, Y-linked, pseudogene (PRKY), non-coding RNA [NR_028062]                                          |



|    |              |    |        |        |            |        |         |                                            |           |                                                                                                                              |
|----|--------------|----|--------|--------|------------|--------|---------|--------------------------------------------|-----------|------------------------------------------------------------------------------------------------------------------------------|
| 29 | LOC100507254 | NA |        | 8.3526 | 0.00069094 | 3.1606 | 0.1191  | Low - High; Medium - High;<br>Medium - Low | NR_038981 | Homo sapiens taxilin gamma 2, pseudogene (TXLNG2P), transcript variant 1, non-coding RNA [NR_045128]                         |
| 30 | CRISPLD2     |    | 83716  | 8.2679 | 0.0007372  | 3.1324 | 0.12149 | High - Low; High - Medium;<br>Medium - Low | NM_031476 | BROAD Institute lincRNA (XLOC_008276), lincRNA [TCONS_00017606]                                                              |
| 31 | RAP1GAP2     |    | 23108  | 8.2395 | 0.00075338 | 3.123  | 0.12149 | High - Low; High - Medium;<br>Medium - Low | NM_015085 | PREDICTED: Homo sapiens hypothetical LOC100506003 (LOC100506003), miscRNA [XR_109785]                                        |
| 32 | BTG2         |    | 7832   | 8.1647 | 0.00079789 | 3.0981 | 0.12387 | Low - High; Medium - High;<br>Low - Medium | NM_006763 | BROAD Institute lincRNA (XLOC_008276), lincRNA [TCONS_00017607]                                                              |
| 33 | TCL1A        |    | 8115   | 8.1327 | 0.00081773 | 3.0874 | 0.12387 | Low - High; Medium - High;<br>Medium - Low | NM_021966 | BROAD Institute lincRNA (XLOC_008185), lincRNA [TCONS_00017074]                                                              |
| 34 | XLOC_008276  | NA |        | 8.0773 | 0.00085332 | 3.0689 | 0.12461 | Low - High; Medium - High;<br>Low - Medium |           | Homo sapiens stratifin (SFN), mRNA [NM_006142]                                                                               |
| 35 | TXLNG2P      |    | 246126 | 8.0035 | 0.00090325 | 3.0442 | 0.12461 | Low - High; Medium - High;<br>Low - Medium | NR_045128 | Homo sapiens regulator of G-protein signaling 1 (RGS1), mRNA [NM_002922]                                                     |
| 36 | XLOC_008276  | NA |        | 7.9791 | 0.00092041 | 3.036  | 0.12461 | Low - High; Medium - High;<br>Low - Medium |           | Homo sapiens testis-specific transcript, Y-linked 15 (non-protein coding) (TTY15), non-coding RNA [NR_001545]                |
| 37 | DSP          |    | 1832   | 7.9765 | 0.0009223  | 3.0351 | 0.12461 | Low - High; Medium - High;<br>Medium - Low | NM_004415 | Homo sapiens interleukin 8 (IL8), mRNA [NM_000584]                                                                           |
| 38 | SEC14L3      |    | 266629 | 7.8772 | 0.00099589 | 3.0018 | 0.12727 | Low - High; Medium - High;<br>Low - Medium | AK131358  | Homo sapiens early growth response 3 (EGR3), transcript variant 1, mRNA [NM_004430]                                          |
| 39 | TXLNG2P      |    | 246126 | 7.8639 | 0.0010062  | 2.9973 | 0.12727 | Low - High; Medium - High;<br>Low - Medium | NR_045129 | Homo sapiens prostaglandin-endoperoxide synthase 2 (prostaglandin G/H synthase and cyclooxygenase) (PTGS2), mRNA [NM_000963] |
| 40 | GADD45G      |    | 10912  | 7.8484 | 0.0010183  | 2.9921 | 0.12727 | High - Low; High - Medium;<br>Medium - Low | NM_006705 | Homo sapiens chemokine (C-X-C motif) receptor 4 (CXCR4), transcript variant 1, mRNA [NM_001008540]                           |

|    |              |       |        |        |           |        |         |                                         |              |                                                                                                                 |
|----|--------------|-------|--------|--------|-----------|--------|---------|-----------------------------------------|--------------|-----------------------------------------------------------------------------------------------------------------|
| 41 | MXI1         |       | 4601   | 7.799  | 0.0010581 | 2.9755 | 0.12901 | Low - High; Medium - High; Medium - Low | NM_130439    | BROAD Institute lincRNA (XLOC_012515), lincRNA [TCONS_00025694]                                                 |
| 42 | CCDC144A     |       | 9720   | 7.7248 | 0.0011209 | 2.9504 | 0.13341 | Low - High; Medium - High; Low - Medium | NM_014695    | interleukin 8 [Source:HGNC Symbol;Acc:6025] [ENST00000401931]                                                   |
| 43 | TAGAP        |       | 117289 | 7.689  | 0.0011525 | 2.9384 | 0.13398 | Low - High; Medium - High; Low - Medium | NM_138810    | Homo sapiens early growth response 2 (EGR2), transcript variant 1, mRNA [NM_000399]                             |
| 44 | LOC100134317 | NA    |        | 7.6375 | 0.0011996 | 2.9209 | 0.1363  | Low - High; Medium - High; Low - Medium | NR_029389    | Homo sapiens zinc finger protein, Y-linked (ZFY), transcript variant 1, mRNA [NM_003411]                        |
| 45 | PSPHP1       | NA    |        | 7.5814 | 0.0012534 | 2.9019 | 0.13923 | High - Low; Medium - High; Medium - Low | BC065228     | Homo sapiens testis-specific transcript, Y-linked 15 (non-protein coding) (TTY15), non-coding RNA [NR_001545]   |
| 46 | MXD3         |       | 83463  | 7.4533 | 0.0013855 | 2.8584 | 0.14828 | High - Low; High - Medium; Medium - Low | NM_001142935 | PREDICTED: Homo sapiens hypothetical LOC643072 (LOC643072), miscRNA [XR_108434]                                 |
| 47 |              | 1-Mar | 64757  | 7.4453 | 0.0013941 | 2.8557 | 0.14828 | High - Low; High - Medium; Medium - Low | NM_022746    | Homo sapiens DEAD (Asp-Glu-Ala-Asp) box polypeptide 3, Y-linked (DDX3Y), transcript variant 2, mRNA [NM_004660] |
| 48 | LPCAT2       |       | 54947  | 7.346  | 0.0015072 | 2.8218 | 0.15696 | High - Low; High - Medium; Medium - Low | NM_017839    | Homo sapiens FBJ murine osteosarcoma viral oncogene homolog B (FOSB), transcript variant 1, mRNA [NM_006732]    |
| 49 | USP9Y        |       | 8287   | 7.3133 | 0.0015464 | 2.8107 | 0.15777 | Low - High; Medium - High; Low - Medium | NM_004654    | Homo sapiens amphiregulin (AREG), mRNA [NM_001657]                                                              |
| 50 | APBA2        |       | 321    | 7.1973 | 0.0016945 | 2.771  | 0.16942 | Low - High; Medium - High; Low - Medium | AK124794     | Homo sapiens small ILF3/NF90-associated RNA B2 (SNAR-B2), small nuclear RNA [NR_024230]                         |
| 51 | BMS1P1       | NA    |        | 7.1416 | 0.0017707 | 2.7519 | 0.17356 | Low - High; Medium - High; Low - Medium | NR_026566    | Homo sapiens early growth response 1 (EGR1), mRNA [NM_001964]                                                   |

|    |              |    |        |        |           |        |         |                                            |              |                                                                                                                             |
|----|--------------|----|--------|--------|-----------|--------|---------|--------------------------------------------|--------------|-----------------------------------------------------------------------------------------------------------------------------|
| 52 | STK17B       |    | 9262   | 7.0427 | 0.0019151 | 2.7178 | 0.1838  | Low - High; Medium - High;<br>Low - Medium | BC052561     | Homo sapiens ubiquitously transcribed tetratricopeptide repeat gene, Y-linked (UTY), transcript variant 1, mRNA [NM_182660] |
| 53 | CCDC144A     | NA |        | 6.9906 | 0.0019958 | 2.6999 | 0.1838  | Low - High; Medium - High;<br>Low - Medium | NM_014695    | Homo sapiens adenosine A3 receptor (ADORA3), transcript variant 2, mRNA [NM_000677]                                         |
| 54 | LOC100652951 | NA |        | 6.9874 | 0.0020009 | 2.6988 | 0.1838  | Low - High; Medium - High;<br>Low - Medium | XR_132888    | Homo sapiens chemokine (C-C motif) ligand 3-like 3 (CCL3L3), mRNA [NM_001001437]                                            |
| 55 | BNIP3L       |    | 665    | 6.9741 | 0.0020222 | 2.6942 | 0.1838  | Low - High; Medium - High;<br>Low - Medium | NM_004331    | 1718340A KALIG-1 gene. {Homo sapiens} (exp=-1; wgp=0; cg=0), partial (11%) [THC2783530]                                     |
| 56 | CCL3L3       |    | 414062 | 6.9335 | 0.0020885 | 2.6802 | 0.1842  | Low - High; Medium - High;<br>Low - Medium | NM_001001437 | Homo sapiens G0/G1switch 2 (G0S2), mRNA [NM_015714]                                                                         |
| 57 | GALNT14      |    | 79623  | 6.9167 | 0.0021167 | 2.6743 | 0.1842  | High - Low; Medium - High;<br>Medium - Low | NM_024572    | Homo sapiens phorbol-12-myristate-13-acetate-induced protein 1 (PMAIP1), mRNA [NM_021127]                                   |
| 58 | AKNA         |    | 80709  | 6.9046 | 0.0021372 | 2.6702 | 0.1842  | Low - High; Medium - High;<br>Low - Medium | AB075848     | Homo sapiens fibroblast growth factor receptor 2 (FGFR2), transcript variant 2, mRNA [NM_022970]                            |
| 59 | EIF1AY       |    | 9086   | 6.8716 | 0.002194  | 2.6588 | 0.1859  | Low - High; Medium - High;<br>Low - Medium | NM_004681    | Homo sapiens FBJ murine osteosarcoma viral oncogene homolog (FOS), mRNA [NM_005252]                                         |
| 60 | LRRC14       |    | 9684   | 6.8482 | 0.0022355 | 2.6506 | 0.18623 | Low - High; Medium - High;<br>Low - Medium | NM_014665    | phosphatase and actin regulator 1 [Source:HGNC Symbol;Acc:20990] [ENST00000379350]                                          |
| 61 | ARHGEF4      |    | 50649  | 6.8276 | 0.0022724 | 2.6435 | 0.18623 | Low - High; Medium - High;<br>Low - Medium | NM_032995    | Homo sapiens dual specificity phosphatase 2 (DUSP2), mRNA [NM_004418]                                                       |
| 62 | UTY          |    | 7404   | 6.7397 | 0.0024378 | 2.613  | 0.19655 | Low - High; Medium - High;<br>Low - Medium | NM_182660    | Homo sapiens purinergic receptor P2Y, G-protein coupled, 2 (P2RY2), transcript variant 1, mRNA [NM_176072]                  |

|    |                |    |        |        |           |        |         |                                            |           |                                                                                                                                                                             |
|----|----------------|----|--------|--------|-----------|--------|---------|--------------------------------------------|-----------|-----------------------------------------------------------------------------------------------------------------------------------------------------------------------------|
| 63 | PGLYRP1        |    | 8993   | 6.7117 | 0.0024932 | 2.6032 | 0.19783 | High - Low; High - Medium;<br>Medium - Low | NM_005091 | Homo sapiens serine/threonine kinase 17b (apoptosis-inducing), mRNA (cDNA clone IMAGE:6280720), partial cds. [BC052561]                                                     |
| 64 | XLOC_I2_013931 | NA |        | 6.6696 | 0.0025787 | 2.5886 | 0.20142 | Low - High; Medium - High;<br>Low - Medium |           | Homo sapiens protease, serine, 33 (PRSS33), mRNA [NM_152891]                                                                                                                |
| 65 | ZNHIT2         |    | 741    | 6.6193 | 0.0026849 | 2.5711 | 0.20599 | Low - High; Medium - High;<br>Low - Medium | NM_014205 | Q6IMA3_RAT (Q6IMA3) RAS-like family 11 member A, partial (6%) [THC2749835]                                                                                                  |
| 66 | XLOC_008323    | NA |        | 6.6033 | 0.0027196 | 2.5655 | 0.20599 | Low - High; Medium - High;<br>Low - Medium |           | Uncharacterized protein cDNA FLJ27030 fis, clone SLV07741 [Source:UniProtKB/TrEMBL;Acc:Q6ZNW3] [ENST00000369474]                                                            |
| 67 | NAMPT          |    | 10135  | 6.5207 | 0.0029064 | 2.5366 | 0.21685 | Low - High; Medium - High;<br>Low - Medium | AK023341  | Homo sapiens period homolog 1 (Drosophila) (PER1), mRNA [NM_002616]                                                                                                         |
| 68 | LOC645195      |    | 645195 | 6.4959 | 0.0029652 | 2.5279 | 0.21798 | Low - High; Medium - High;<br>Low - Medium | AK123450  | Homo sapiens small ILF3/NF90-associated RNA D (SNAR-D), small nuclear RNA [NR_024243]                                                                                       |
| 69 | C17orf103      |    | 256302 | 6.4746 | 0.0030166 | 2.5205 | 0.21855 | Low - High; Medium - High;<br>Low - Medium | NM_152914 | Homo sapiens uncharacterized LOC100507254 (LOC100507254), non-coding RNA [NR_038981]                                                                                        |
| 70 | ADORA3         |    | 140    | 6.3769 | 0.0032643 | 2.4862 | 0.22529 | High - Low; Medium - High;<br>Medium - Low | NM_000677 | BROAD Institute lincRNA (XLOC_012515), lincRNA [TCONS_00025237]                                                                                                             |
| 71 | XLOC_003400    | NA |        | 6.3544 | 0.0033242 | 2.4783 | 0.22529 | High - Low; Medium - High;<br>Medium - Low |           | Homo sapiens solute carrier family 29 (nucleoside transporters), member 1 (SLC29A1), nuclear gene encoding mitochondrial protein, transcript variant 1, mRNA [NM_001078177] |

|    |                |    |           |        |           |        |         |                                            |              |                                                                                                                 |
|----|----------------|----|-----------|--------|-----------|--------|---------|--------------------------------------------|--------------|-----------------------------------------------------------------------------------------------------------------|
| 72 | SNORD90        | NA |           | 6.3471 | 0.003344  | 2.4757 | 0.22529 | Low - High; Medium - High;<br>Medium - Low | NR_003071    | Homo sapiens tumor necrosis factor receptor superfamily, member 12A (TNFRSF12A), mRNA [NM_016639]               |
| 73 | BEND7          |    | 222389    | 6.3197 | 0.0034191 | 2.4661 | 0.22529 | High - Low; High - Medium;<br>Medium - Low | NM_152751    | BROAD Institute lincRNA (XLOC_003772), lincRNA [TCONS_00008317]                                                 |
| 74 | XLOC_I2_004611 | NA |           | 6.2853 | 0.0035158 | 2.454  | 0.22529 | Low - High; Medium - High;<br>Low - Medium |              | PREDICTED: Homo sapiens hypothetical LOC100506342 (LOC100506342), miscRNA [XR_108862]                           |
| 75 | FAM27E3        |    | 100131997 | 6.2841 | 0.0035189 | 2.4536 | 0.22529 | High - Low; Medium - High;<br>Medium - Low | XM_001720463 | PREDICTED: Homo sapiens hypothetical LOC100652951 (LOC100652951), miscRNA [XR_132888]                           |
| 76 | CYP1B1-AS1     | NA |           | 6.2721 | 0.0035535 | 2.4493 | 0.22529 | High - Low; High - Medium;<br>Medium - Low | NR_027252    | Homo sapiens amiloride binding protein 1 (amine oxidase (copper-containing)) (ABP1), mRNA [NM_001091]           |
| 77 | ABP1           |    | 26        | 6.2653 | 0.0035733 | 2.4469 | 0.22529 | High - Low; Medium - High;<br>Medium - Low | NM_001091    | Q2NUU5_SODGM (Q2NUU5) Glutamate-aspartate ABC transporter ATP-binding component GltL, partial (7%) [THC2533854] |
| 78 | MXI1           |    | 4601      | 6.2441 | 0.0036352 | 2.4395 | 0.22529 | Low - High; Medium - High;<br>Medium - Low | NM_005962    | Homo sapiens BTG family, member 2 (BTG2), mRNA [NM_006763]                                                      |
| 79 | XLOC_007635    | NA |           | 6.2404 | 0.0036461 | 2.4382 | 0.22529 | Low - High; High - Medium;<br>Low - Medium |              | Homo sapiens uncharacterized LOC100507254 (LOC100507254), non-coding RNA [NR_038981]                            |
| 80 | DDHD2          | NA |           | 6.2323 | 0.0036701 | 2.4353 | 0.22529 | Low - High; Medium - High;<br>Low - Medium | NM_001164234 | Homo sapiens mRNA; cDNA DKFZp761E2117 (from clone DKFZp761E2117). [AL831857]                                    |
| 81 | RHOXF1         |    | 158800    | 6.2314 | 0.0036728 | 2.435  | 0.22529 | Low - High; High - Medium;<br>Low - Medium | NM_139282    | SEC14-like 3 (S. cerevisiae) [Source:HGNC Symbol;Acc:18655] [ENST00000415957]                                   |

|    |             |    |        |        |           |        |         |                                            |              |                                                                                                                          |
|----|-------------|----|--------|--------|-----------|--------|---------|--------------------------------------------|--------------|--------------------------------------------------------------------------------------------------------------------------|
| 82 | TGM2        |    | 7052   | 6.2238 | 0.0036955 | 2.4323 | 0.22529 | Low - High; High - Medium;<br>Low - Medium | NM_198951    | Homo sapiens D-dopachrome tautomerase-like (LOC391322), mRNA [NM_001144931]                                              |
| 83 | USP9Y       |    | 8287   | 6.2027 | 0.0037595 | 2.4249 | 0.22603 | Low - High; Medium - High;<br>Low - Medium | NM_004654    | Homo sapiens DNA-damage-inducible transcript 4 (DDIT4), mRNA [NM_019058]                                                 |
| 84 | KDM5D       |    | 8284   | 6.1902 | 0.0037981 | 2.4204 | 0.22603 | Low - High; Medium - High;<br>Low - Medium | NM_004653    | BROAD Institute lincRNA (XLOC_012043), lincRNA [TCONS_00025079]                                                          |
| 85 | EGR1        |    | 1958   | 6.1528 | 0.0039155 | 2.4072 | 0.23027 | Low - High; Medium - High;<br>Low - Medium | NM_001964    | PREDICTED: Homo sapiens hypothetical LOC100507540 (LOC100507540), miscRNA [XR_108989]                                    |
| 86 | CA4         |    | 762    | 6.0952 | 0.0041036 | 2.3868 | 0.23601 | High - Low; High - Medium;<br>Medium - Low | NM_000717    | Homo sapiens CYP1B1 antisense RNA 1 (non-protein coding) (CYP1B1-AS1), non-coding RNA [NR_027252]                        |
| 87 | TTY15       | NA |        | 6.0941 | 0.0041074 | 2.3864 | 0.23601 | Low - High; Medium - High;<br>Low - Medium | NR_001545    | 601818170F1 NIH_MGC_58 Homo sapiens cDNA clone IMAGE:4042121 5', mRNA sequence [BF130157]                                |
| 88 | NPRL3       |    | 8131   | 6.0386 | 0.0042978 | 2.3668 | 0.24414 | Low - High; Medium - High;<br>Medium - Low | NM_001039476 | Homo sapiens TBC1 domain family, member 7 (TBC1D7), transcript variant 3, mRNA [NM_001143965]                            |
| 89 | DUSP1       |    | 1843   | 6.0193 | 0.0043662 | 2.3599 | 0.2447  | Low - High; Medium - High;<br>Low - Medium | NM_004417    | Homo sapiens vesicle amine transport protein 1 homolog (T. californica) (VAT1), mRNA [NM_006373]                         |
| 90 | LOC391322   |    | 391322 | 6.0083 | 0.0044055 | 2.356  | 0.2447  | Low - High; High - Medium;<br>Low - Medium | NM_001144931 | Homo sapiens sphingomyelin phosphodiesterase 3, neutral membrane (neutral sphingomyelinase II) (SMPD3), mRNA [NM_018667] |
| 91 | XLOC_011248 | NA |        | 5.987  | 0.004483  | 2.3484 | 0.24627 | Low - High; Medium - High;<br>Low - Medium | BC035091     | Homo sapiens cytochrome P450, family 4, subfamily F, polypeptide 12 (CYP4F12), mRNA [NM_023944]                          |

|     |                |    |       |        |           |        |         |                                            |              |                                                                                                                                           |
|-----|----------------|----|-------|--------|-----------|--------|---------|--------------------------------------------|--------------|-------------------------------------------------------------------------------------------------------------------------------------------|
| 92  | HS3ST1         |    | 9957  | 5.9496 | 0.0046225 | 2.3351 | 0.25117 | Low - High; Medium - High;<br>Medium - Low | NM_005114    | Homo sapiens Charcot-Leyden crystal protein (CLC), mRNA [NM_001828]                                                                       |
| 93  |                | NA |       | 5.9349 | 0.0046785 | 2.3299 | 0.25148 | Low - High; Medium - High;<br>Low - Medium | CR997556     | Homo sapiens RhoX homeobox family, member 1 (RHOXF1), mRNA [NM_139282]                                                                    |
| 94  |                | NA |       | 5.9095 | 0.0047768 | 2.3209 | 0.25302 | High - Low; High - Medium;<br>Medium - Low | S55273       | K-EST0169216 L10ChoCK0 Homo sapiens cDNA clone L10ChoCK0-27-D04 5', mRNA sequence [CB121594]                                              |
| 95  | OVGP1          |    | 5016  | 5.9015 | 0.0048084 | 2.318  | 0.25302 | Low - High; Medium - High;<br>Low - Medium | NM_002557    | Homo sapiens egf-like module containing, mucin-like, hormone receptor-like 1 (EMR1), mRNA [NM_001974]                                     |
| 96  | CCDC144A       | NA |       | 5.8835 | 0.0048799 | 2.3116 | 0.25348 | Low - High; Medium - High;<br>Low - Medium | NM_014695    | Homo sapiens sialic acid binding Ig-like lectin 8 (SIGLEC8), mRNA [NM_014442]                                                             |
| 97  | XIST           | NA |       | 5.8631 | 0.0049625 | 2.3043 | 0.25348 | High - Low; High - Medium;<br>Medium - Low | NR_001564    | Homo sapiens UDP-N-acetyl-alpha-D-galactosamine:polypeptide N-acetylgalactosaminyltransferase 14 (GalNAc-T14) (GALNT14), mRNA [NM_024572] |
| 98  | XIST           | NA |       | 5.8614 | 0.0049693 | 2.3037 | 0.25348 | High - Low; High - Medium;<br>Medium - Low | NR_001564    | Homo sapiens olfactory receptor, family 2, subfamily M, member 7 (OR2M7), mRNA [NM_001004691]                                             |
| 99  | TNFRSF12A      |    | 51330 | 5.8355 | 0.0050761 | 2.2945 | 0.25431 | High - Low; High - Medium;<br>Medium - Low | NM_016639    | Homo sapiens shisa homolog 4 (Xenopus laevis) (SHISA4), transcript variant 1, mRNA [NM_198149]                                            |
| 100 | XLOC_l2_015849 | NA |       | 5.8329 | 0.0050873 | 2.2935 | 0.25431 | Low - High; Medium - High;<br>Low - Medium | BX111592     | Homo sapiens cystatin F (leukocystatin) (CST7), mRNA [NM_003650]                                                                          |
| 101 | XPNPEP3        | NA |       | 5.7945 | 0.0052505 | 2.2798 | 0.2589  | Low - High; Medium - High;<br>Low - Medium | NM_001204827 | Homo sapiens chemokine (C-C motif) ligand 23 (CCL23), transcript variant CKbeta8-1, mRNA [NM_005064]                                      |

|     |           |    |        |        |           |        |         |                                            |              |                                                                                                                   |
|-----|-----------|----|--------|--------|-----------|--------|---------|--------------------------------------------|--------------|-------------------------------------------------------------------------------------------------------------------|
| 102 | NEAT1     |    | 283131 | 5.7871 | 0.0052825 | 2.2772 | 0.2589  | Low - High; Medium - High;<br>Low - Medium | AF001893     | HUMDSAEC mitochondrial 3-oxoacyl-CoA thiolase {Homo sapiens} (exp=-1; wgp=0; cg=0), partial (14%) [THC2567789]    |
| 103 | FAM129C   |    | 199786 | 5.7356 | 0.0055116 | 2.2587 | 0.26537 | Low - High; Medium - High;<br>Medium - Low | NM_001098524 | Homo sapiens chromosome 9 open reading frame 40 (C9orf40), mRNA [NM_017998]                                       |
| 104 | XIST      | NA |        | 5.7204 | 0.0055811 | 2.2533 | 0.26537 | High - Low; High - Medium;<br>Medium - Low | NR_001564    | Homo sapiens spinster homolog 3 (Drosophila) (SPNS3), mRNA [NM_182538]                                            |
| 105 | WNK4      |    | 65266  | 5.7202 | 0.0055821 | 2.2532 | 0.26537 | Low - High; High - Medium;<br>Low - Medium | NM_032387    | Homo sapiens amphiregulin (AREG), mRNA [NM_001657]                                                                |
| 106 | HNF1A-AS1 |    | 283460 | 5.7032 | 0.0056609 | 2.2471 | 0.26537 | Low - High; Medium - High;<br>Low - Medium | NR_024345    | Homo sapiens calcium channel, voltage-dependent, gamma subunit 6 (CACNG6), transcript variant 1, mRNA [NM_145814] |
| 107 | EIF1AY    |    | 9086   | 5.6991 | 0.00568   | 2.2457 | 0.26537 | Low - High; Medium - High;<br>Low - Medium | NM_004681    | Homo sapiens trefoil factor 3 (intestinal) (TFF3), mRNA [NM_003226]                                               |
| 108 | XIST      | NA |        | 5.6799 | 0.0057707 | 2.2388 | 0.26711 | High - Low; High - Medium;<br>Medium - Low | NR_001564    | Homo sapiens carbonic anhydrase XIV (CA14), mRNA [NM_012113]                                                      |
| 109 | XIST      | NA |        | 5.6656 | 0.0058394 | 2.2336 | 0.26781 | High - Low; High - Medium;<br>Medium - Low | NR_001564    | Homo sapiens phosphoinositide-3-kinase, regulatory subunit 6 (PIK3R6), mRNA [NM_001010855]                        |
| 110 | KLF14     |    | 136259 | 5.6417 | 0.005956  | 2.225  | 0.26935 | Low - High; Medium - High;<br>Low - Medium | NM_138693    | Homo sapiens TSIX transcript, XIST antisense RNA (non-protein coding) (TSIX), antisense RNA [NR_003255]           |
| 111 | FCRL2     |    | 79368  | 5.6274 | 0.006027  | 2.2199 | 0.26935 | Low - High; Medium - High;<br>Low - Medium | NM_030764    | Homo sapiens ubiquitin specific peptidase 9, Y-linked (USP9Y), mRNA [NM_004654]                                   |



|     |              |    |        |        |           |        |         |                                            |              |                                                                                                                       |
|-----|--------------|----|--------|--------|-----------|--------|---------|--------------------------------------------|--------------|-----------------------------------------------------------------------------------------------------------------------|
| 112 | BMS1P5       | NA |        | 5.6213 | 0.0060573 | 2.2177 | 0.26935 | Low - High; Medium - High;<br>Low - Medium | BC065722     | Homo sapiens T-cell activation RhoGTPase activating protein (TAGAP), transcript variant 3, mRNA [NM_138810]           |
| 113 | LOC100509121 | NA |        | 5.6151 | 0.0060885 | 2.2155 | 0.26935 | Low - High; Medium - High;<br>Low - Medium | XM_003120334 | Homo sapiens chymotrypsin-like elastase family, member 2B (CELA2B), mRNA [NM_015849]                                  |
| 114 | C4BPA        |    | 722    | 5.5431 | 0.0064632 | 2.1896 | 0.28286 | Low - High; High - Medium;<br>Low - Medium | NM_000715    | Homo sapiens matrix metalloproteinase 19 (MMP19), transcript variant 1, mRNA [NM_002429]                              |
| 115 | GOLGA8A      | NA |        | 5.5225 | 0.0065745 | 2.1821 | 0.28286 | Low - High; Medium - High;<br>Low - Medium | NR_027409    | D80009 Start codon is not identified {Homo sapiens} (exp=-1; wgp=0; cg=0), partial (12%) [THC2480131]                 |
| 116 | TXLNG2P      |    | 246126 | 5.5193 | 0.0065917 | 2.181  | 0.28286 | Low - High; Medium - High;<br>Low - Medium | NR_045128    | full-length cDNA clone CSODL011YN21 of B cells (Ramos cell line) Cot 25-normalized of Homo sapiens (human) [CR607309] |
| 117 | DDX3Y        |    | 8653   | 5.5118 | 0.0066333 | 2.1783 | 0.28286 | Low - High; Medium - High;<br>Low - Medium | NM_001122665 | Homo sapiens nuclear receptor subfamily 4, group A, member 2 (NR4A2), mRNA [NM_006186]                                |
| 118 | XIST         | NA |        | 5.5039 | 0.0066768 | 2.1754 | 0.28286 | High - Low; High - Medium;<br>Medium - Low | NR_001564    | BROAD Institute lincRNA (XLOC_009548), lincRNA [TCONS_00019754]                                                       |
| 119 | LOC158863    |    | 158863 | 5.4863 | 0.0067749 | 2.1691 | 0.2846  | Low - High; Medium - High;<br>Low - Medium | AL110203     | BROAD Institute lincRNA (XLOC_002172), lincRNA [TCONS_00003324]                                                       |
| 120 | XIST         |    | 7503   | 5.4602 | 0.0069237 | 2.1597 | 0.28843 | High - Low; High - Medium;<br>Medium - Low | NR_001564    | Homo sapiens CD69 molecule (CD69), transcript variant 1, mRNA [NM_001781]                                             |
| 121 | CCDC144A     |    | 9720   | 5.446  | 0.0070058 | 2.1545 | 0.28944 | Low - High; Medium - High;<br>Low - Medium | NM_014695    | dedicator of cytokinesis 9 [Source:HGNC Symbol;Acc:14132] [ENST00000340449]                                           |

|     |                |    |        |        |           |        |         |                                            |              |                                                                                                          |
|-----|----------------|----|--------|--------|-----------|--------|---------|--------------------------------------------|--------------|----------------------------------------------------------------------------------------------------------|
| 122 | LOC100128262   | NA |        | 5.4248 | 0.0071307 | 2.1469 | 0.28957 | Low - High; Medium - High;<br>Medium - Low | XR_110396    | Homo sapiens G protein-coupled receptor 44 (GPR44), mRNA [NM_004778]                                     |
| 123 | MPP1           |    | 4354   | 5.4162 | 0.007182  | 2.1438 | 0.28957 | Low - High; Medium - High;<br>Low - Medium | NM_001166461 | Homo sapiens protease, serine, 33 (PRSS33), mRNA [NM_152891]                                             |
| 124 | HCG18          | NA |        | 5.4107 | 0.0072148 | 2.1418 | 0.28957 | Low - High; Medium - High;<br>Low - Medium | NR_024052    | Homo sapiens disrupted in schizophrenia 1 (DISC1), transcript variant q, mRNA [NM_001164554]             |
| 125 | C2orf63        |    | 130162 | 5.4064 | 0.0072406 | 2.1402 | 0.28957 | Low - High; High - Medium;<br>Low - Medium | NM_152385    | Homo sapiens BMP and activin membrane-bound inhibitor homolog (Xenopus laevis) (BAMBI), mRNA [NM_012342] |
| 126 | MIA            |    | 8190   | 5.373  | 0.0074455 | 2.1281 | 0.29369 | High - Low; High - Medium;<br>Medium - Low | NM_006533    | AT-hook transcription factor [Source:HGNC Symbol;Acc:24108] [ENST00000312033]                            |
| 127 | THBS3          |    | 7059   | 5.3692 | 0.0074686 | 2.1268 | 0.29369 | High - Low; High - Medium;<br>Medium - Low | CR933610     | Homo sapiens chemokine (C-C motif) ligand 4 (CCL4), transcript variant 1, mRNA [NM_002984]               |
| 128 | LINC00482      |    | 284185 | 5.361  | 0.00752   | 2.1238 | 0.29369 | High - Low; High - Medium;<br>Medium - Low | NR_038080    | Homo sapiens leucine rich repeat neuronal 3 (LRRN3), transcript variant 3, mRNA [NM_018334]              |
| 129 | ANKRD36BP2     |    | 645784 | 5.3435 | 0.0076311 | 2.1174 | 0.29513 | Low - High; Medium - High;<br>Low - Medium | NR_015424    | Homo sapiens complement component 3a receptor 1 (C3AR1), mRNA [NM_004054]                                |
| 130 | RPS4Y2         |    | 140032 | 5.3366 | 0.007675  | 2.1149 | 0.29513 | Low - High; Medium - High;<br>Low - Medium | NM_001039567 | BROAD Institute lincRNA (XLOC_001595), lincRNA [TCONS_00003799]                                          |
| 131 | XLOC_l2_002886 | NA |        | 5.3106 | 0.0078433 | 2.1055 | 0.2993  | Low - High; Medium - High;<br>Low - Medium |              | Homo sapiens chemokine (C-C motif) ligand 4 (CCL4), transcript variant 1, mRNA [NM_002984]               |
| 132 | SULT1A2        |    | 6799   | 5.3001 | 0.0079126 | 2.1017 | 0.29966 | High - Low; High - Medium;<br>Medium - Low | NM_177528    | RAB44, member RAS oncogene family [Source:HGNC Symbol;Acc:21068] [ENST00000229824]                       |

|     |              |    |           |        |           |        |         |                                            |              |                                                                                                                                         |
|-----|--------------|----|-----------|--------|-----------|--------|---------|--------------------------------------------|--------------|-----------------------------------------------------------------------------------------------------------------------------------------|
| 133 | LOC652119    |    | 652119    | 5.282  | 0.0080333 | 2.0951 | 0.30194 | Low - High; Medium - High;<br>Low - Medium | XM_001720798 | Homo sapiens<br>CCAAT/enhancer binding<br>protein (C/EBP), epsilon<br>(CEBPE), mRNA [NM_001805]                                         |
| 134 | C1orf140     |    | 400804    | 5.2635 | 0.0081582 | 2.0884 | 0.30232 | High - Low; Medium - High;<br>Medium - Low | NR_024236    | BROAD Institute lincRNA<br>(XLOC_I2_005490), lincRNA<br>[TCONS_I2_00010465]                                                             |
| 135 | FOSB         |    | 2354      | 5.2609 | 0.0081761 | 2.0875 | 0.30232 | Low - High; Medium - High;<br>Low - Medium | NM_006732    | Homo sapiens RAP1 GTPase<br>activating protein 2<br>(RAP1GAP2), transcript variant<br>1, mRNA [NM_015085]                               |
| 136 | RGS14        |    | 10636     | 5.2513 | 0.008242  | 2.084  | 0.30232 | High - Low; High - Medium;<br>Medium - Low | NM_006480    | Homo sapiens small nuclear<br>ribonucleoprotein polypeptide<br>N pseudogene<br>(LOC100129534), non-coding<br>RNA [NR_024489]            |
| 137 | REREP3       |    | 646396    | 5.2451 | 0.0082853 | 2.0817 | 0.30232 | Low - High; Medium - High;<br>Low - Medium | NR_033735    | Homo sapiens V-set and<br>transmembrane domain<br>containing 1 (VSTM1), mRNA<br>[NM_198481]                                             |
| 138 | RPS4Y1       |    | 6192      | 5.2265 | 0.0084149 | 2.0749 | 0.30483 | Low - High; Medium - High;<br>Low - Medium | NM_001008    |                                                                                                                                         |
| 139 | GFRA1        |    | 2674      | 5.2021 | 0.008589  | 2.0661 | 0.30721 | High - Low; High - Medium;<br>Medium - Low | NM_005264    | Homo sapiens chemokine (C-C<br>motif) receptor 3 (CCR3),<br>transcript variant 1, mRNA<br>[NM_001837]                                   |
| 140 | LOC100289580 |    | 100289580 | 5.2001 | 0.0086036 | 2.0653 | 0.30721 | Low - High; Medium - High;<br>Low - Medium | AK127064     | Homo sapiens leukotriene C4<br>synthase (LTC4S), mRNA<br>[NM_145867]                                                                    |
| 141 | XLOC_008276  | NA |           | 5.1381 | 0.0090633 | 2.0427 | 0.32133 | Low - High; Medium - High;<br>Low - Medium |              | Homo sapiens peripheral<br>myelin protein 22 (PMP22),<br>transcript variant 1, mRNA<br>[NM_000304]                                      |
| 142 | LOC100506003 | NA |           | 5.1207 | 0.0091964 | 2.0364 | 0.32375 | Low - High; Medium - High;<br>Low - Medium | XR_109785    | Homo sapiens potassium<br>inwardly-rectifying channel,<br>subfamily J, member 15<br>(KCNJ15), transcript variant 1,<br>mRNA [NM_170736] |
| 143 | HILPDA       |    | 29923     | 5.1095 | 0.0092833 | 2.0323 | 0.32452 | High - Low; Medium - High;<br>Medium - Low | NM_013332    | BROAD Institute lincRNA<br>(XLOC_006338), lincRNA<br>[TCONS_00014249]                                                                   |

|     |                |    |        |        |           |        |         |                                            |              |                                                                                                                                               |
|-----|----------------|----|--------|--------|-----------|--------|---------|--------------------------------------------|--------------|-----------------------------------------------------------------------------------------------------------------------------------------------|
| 144 | LOC340335      |    | 340335 | 5.0614 | 0.0096671 | 2.0147 | 0.3356  | Low - High; Medium - High;<br>Low - Medium | AK074459     | Homo sapiens CYP1B1 antisense RNA 1 (non-protein coding) (CYP1B1-AS1), non-coding RNA [NR_027252]                                             |
| 145 | XLOC_000683    | NA |        | 5.0323 | 0.0099069 | 2.0041 | 0.34155 | High - Low; High - Medium;<br>Medium - Low | BQ637851     | BROAD Institute lincRNA (XLOC_I2_015752), lincRNA [TCONS_I2_00030522]                                                                         |
| 146 | LOC100505857   | NA |        | 5.0186 | 0.010022  | 1.999  | 0.34315 | Low - High; Medium - High;<br>Low - Medium | DA569430     | hd15d07.y1 Human Retina cDNA (Un-normalized, unamplified): hd [BQ637851]                                                                      |
| 147 | XLOC_008151    | NA |        | 5.0047 | 0.01014   | 1.9939 | 0.34484 | Low - High; Medium - High;<br>Low - Medium | BC015977     | Homo sapiens 5-oxoprolinase (ATP-hydrolysing) (OPLAH), mRNA [NM_017570]                                                                       |
| 148 | VPRBP          |    | 9730   | 4.9908 | 0.01026   | 1.9889 | 0.34654 | Low - High; Medium - High;<br>Low - Medium | NM_014703    | Homo sapiens aminolevulinate, delta-, synthase 2 (ALAS2), nuclear gene encoding mitochondrial protein, transcript variant 1, mRNA [NM_000032] |
| 149 | LOC283663      |    | 283663 | 4.9745 | 0.010402  | 1.9829 | 0.34675 | Low - High; Medium - High;<br>Low - Medium | NR_024433    | Homo sapiens protease, serine, 41 (PRSS41), mRNA [NM_001135086]                                                                               |
| 150 | XLOC_012571    | NA |        | 4.9742 | 0.010405  | 1.9828 | 0.34675 | Low - High; High - Medium;<br>Low - Medium |              | Homo sapiens MAX interactor 1 (MXI1), transcript variant 2, mRNA [NM_130439]                                                                  |
| 151 | ORM2           |    | 5005   | 4.9514 | 0.010607  | 1.9744 | 0.35081 | High - Low; High - Medium;<br>Medium - Low | NM_000608    | Homo sapiens tribbles homolog 1 (Drosophila) (TRIB1), mRNA [NM_025195]                                                                        |
| 152 |                | NA |        | 4.9448 | 0.010667  | 1.972  | 0.35081 | Low - High; Medium - High;<br>Low - Medium | XR_110395    | BROAD Institute lincRNA (XLOC_008015), lincRNA [TCONS_00017433]                                                                               |
| 153 | XLOC_I2_013300 | NA |        | 4.9346 | 0.010759  | 1.9682 | 0.35153 | High - Low; High - Medium;<br>Low - Medium | DB053965     | Homo sapiens desmoplakin (DSP), transcript variant 1, mRNA [NM_004415]                                                                        |
| 154 | TBC1D7         |    | 51256  | 4.8782 | 0.011284  | 1.9475 | 0.3621  | Low - High; High - Medium;<br>Low - Medium | NM_001143965 | BX117229 Soares_NFL_T_GBC_S1 Homo sapiens cDNA clone IMAGp998I184005, mRNA sequence [BX117229]                                                |

|     |          |    |           |        |          |        |         |                                            |              |                                                                                                                                   |
|-----|----------|----|-----------|--------|----------|--------|---------|--------------------------------------------|--------------|-----------------------------------------------------------------------------------------------------------------------------------|
| 155 | RN5-8S1  |    | 100008587 | 4.8771 | 0.011296 | 1.9471 | 0.3621  | Low - High; Medium - High;<br>Low - Medium | NR_003285    | Homo sapiens LIMS3-LOC440895 readthrough (LIMS3-LOC440895), non-coding RNA [NR_027145]                                            |
| 156 | ITGB4    |    | 3691      | 4.8763 | 0.011303 | 1.9468 | 0.3621  | High - Low; High - Medium;<br>Medium - Low | NM_000213    | Homo sapiens G protein-coupled receptor 34 (GPR34), transcript variant 4, mRNA [NM_001097579]                                     |
| 157 | CYP4F12  |    | 66002     | 4.8691 | 0.011372 | 1.9442 | 0.3621  | High - Low; High - Medium;<br>Medium - Low | NM_023944    | Homo sapiens phosphoserine phosphatase (PSPH), mRNA [NM_004577]                                                                   |
| 158 | HPR      |    | 3250      | 4.8501 | 0.011557 | 1.9372 | 0.36471 | High - Low; High - Medium;<br>Medium - Low | NM_020995    | Homo sapiens dual specificity phosphatase 1 (DUSP1), mRNA [NM_004417]                                                             |
| 159 | FLOT2    |    | 2319      | 4.8457 | 0.0116   | 1.9355 | 0.36471 | High - Low; Medium - High;<br>Medium - Low | NM_004475    | Homo sapiens transmembrane phosphoinositide 3-phosphatase and tensin homolog 2 pseudogene 6 (TPTE2P6), non-coding RNA [NR_002815] |
| 160 | PRKY     |    | 5616      | 4.8321 | 0.011735 | 1.9305 | 0.36504 | Low - High; Medium - High;<br>Medium - Low | NR_028062    |                                                                                                                                   |
| 161 | MMP19    |    | 4327      | 4.8299 | 0.011757 | 1.9297 | 0.36504 | Low - High; High - Medium;<br>Low - Medium | NM_002429    |                                                                                                                                   |
| 162 |          | NA |           | 4.8208 | 0.011847 | 1.9264 | 0.36559 | High - Low; High - Medium;<br>Medium - Low |              | PREDICTED: Homo sapiens hypothetical LOC100506897 (LOC100506897), miscRNA [XR_133523]                                             |
| 163 | OPLAH    |    | 26873     | 4.8115 | 0.011942 | 1.9229 | 0.36605 | High - Low; High - Medium;<br>Medium - Low | NM_017570    | CR742343 Homo sapiens library (Ebert L) Homo sapiens cDNA clone IMAGp971K0167 ; IMAGE:1623289 5', mRNA sequence [CR742343]        |
| 164 | C12orf51 |    | 283450    | 4.8047 | 0.01201  | 1.9204 | 0.36605 | Low - High; Medium - High;<br>Low - Medium | NM_001109662 | AGENCOURT_6822137 NIH_MGC_106 Homo sapiens cDNA clone IMAGE:5935069 5', mRNA sequence [BQ053372]                                  |

|     |              |    |           |        |          |        |         |                                            |              |                                                                                                           |
|-----|--------------|----|-----------|--------|----------|--------|---------|--------------------------------------------|--------------|-----------------------------------------------------------------------------------------------------------|
| 165 | LOC286058    |    | 286058    | 4.7864 | 0.012199 | 1.9137 | 0.36605 | Low - High; High - Medium;<br>Low - Medium | AL833160     | Homo sapiens long intergenic non-protein coding RNA 230A (LINCO0230A), non-coding RNA [NR_002161]         |
| 166 |              | NA |           | 4.7728 | 0.01234  | 1.9087 | 0.36605 | High - Low; High - Medium;<br>Medium - Low |              | Homo sapiens ret finger protein-like 4A (RFPL4A), mRNA [NM_001145014]                                     |
| 167 | XLOC_011570  | NA |           | 4.7701 | 0.012368 | 1.9077 | 0.36605 | Low - High; Medium - High;<br>Low - Medium |              | Homo sapiens annexin A3 (ANXA3), mRNA [NM_005139]                                                         |
| 168 | FAM27A       |    | 548321    | 4.7698 | 0.012372 | 1.9076 | 0.36605 | High - Low; Medium - High;<br>Medium - Low | NR_024060    |                                                                                                           |
| 169 | LOC100128252 |    | 100128252 | 4.7668 | 0.012403 | 1.9065 | 0.36605 | Low - High; Medium - High;<br>Medium - Low | NR_036522    | BROAD Institute lincRNA (XLOC_I2_004546), lincRNA [TCONS_I2_00008281]                                     |
| 170 | TSPAN5       |    | 10098     | 4.7625 | 0.012448 | 1.9049 | 0.36605 | Low - High; Medium - High;<br>Medium - Low | NM_005723    | PREDICTED: Homo sapiens hypothetical LOC100131510 (LOC100131510), miscRNA [XR_109960]                     |
| 171 | BEND7        |    | 222389    | 4.7461 | 0.012624 | 1.8988 | 0.36905 | High - Low; High - Medium;<br>Medium - Low | NM_001100912 | Homo sapiens beta-site APP-cleaving enzyme 2 (BACE2), transcript variant a, mRNA [NM_012105]              |
| 172 | MYBPH        |    | 4608      | 4.7219 | 0.012886 | 1.8899 | 0.37218 | High - Low; High - Medium;<br>Medium - Low | NM_004997    |                                                                                                           |
| 173 | PRSS33       |    | 260429    | 4.7194 | 0.012914 | 1.8889 | 0.37218 | High - Low; Medium - High;<br>Medium - Low | NM_152891    | Homo sapiens cellular retinoic acid binding protein 2 (CRABP2), transcript variant 2, mRNA [NM_001199723] |
| 174 | CCDC144A     | NA |           | 4.7131 | 0.012984 | 1.8866 | 0.37218 | Low - High; Medium - High;<br>Low - Medium | NM_014695    | Homo sapiens TSIX transcript, XIST antisense RNA (non-protein coding) (TSIX), antisense RNA [NR_003255]   |
| 175 | MTERFD2      |    | 130916    | 4.709  | 0.013029 | 1.8851 | 0.37218 | Low - High; Medium - High;<br>Low - Medium | NM_182501    | BROAD Institute lincRNA (XLOC_010052), lincRNA [TCONS_00020761]                                           |
| 176 | CST7         |    | 8530      | 4.6947 | 0.013188 | 1.8798 | 0.37459 | High - Low; Medium - High;<br>Medium - Low | NM_003650    | Homo sapiens small ILF3/NF90-associated RNA G2 (SNAR-G2), small nuclear RNA [NR_024244]                   |

|     |                |    |           |        |          |        |         |                                            |              |                                                                                                          |
|-----|----------------|----|-----------|--------|----------|--------|---------|--------------------------------------------|--------------|----------------------------------------------------------------------------------------------------------|
| 177 | SNORA34        | NA |           | 4.6845 | 0.013304 | 1.876  | 0.37574 | Low - High; Medium - High;<br>Low - Medium | NR_002968    | DB089380 TESTI4 Homo sapiens cDNA clone TESTI4037937 5', mRNA sequence [DB089380]                        |
| 178 | HEMGN          |    | 55363     | 4.6766 | 0.013393 | 1.8731 | 0.37605 | Low - High; Medium - High;<br>Low - Medium | NM_018437    | Homo sapiens mRNA; cDNA DKFZp686J1738 (from clone DKFZp686J1738). [CR933610]                             |
| 179 | XLOC_008185    | NA |           | 4.6575 | 0.013613 | 1.8661 | 0.37605 | High - Low; High - Medium;<br>Medium - Low |              | BX111592 Soares_testis_NHT Homo sapiens cDNA clone IMAGp998D162621, mRNA sequence [BX111592]             |
| 180 | LOC100129534   |    | 100129534 | 4.652  | 0.013677 | 1.864  | 0.37605 | Low - High; Medium - High;<br>Low - Medium | NR_024489    | Homo sapiens tetratricopeptide repeat domain 24 (TTC24), mRNA [NM_001105669]                             |
| 181 | MMP9           |    | 4318      | 4.6498 | 0.013703 | 1.8632 | 0.37605 | High - Low; High - Medium;<br>Medium - Low | NM_004994    | Homo sapiens arachidonate 15-lipoxygenase (ALOX15), mRNA [NM_001140]                                     |
| 182 | PLAC8          |    | 51316     | 4.6494 | 0.013708 | 1.863  | 0.37605 | Low - High; Medium - High;<br>Low - Medium | NM_001130715 | Homo sapiens ankyrin repeat and BTB (POZ) domain containing 2 (ABTB2), mRNA [NM_145804]                  |
| 183 | XLOC_I2_006196 | NA |           | 4.6444 | 0.013766 | 1.8612 | 0.37605 | Low - High; Medium - High;<br>Low - Medium |              | DKFZp779O0656_r1 779 (synonym: hncc1) Homo sapiens cDNA clone DKFZp779O0656 5', mRNA sequence [BX500531] |
| 184 | DDX3Y          |    | 8653      | 4.6193 | 0.014064 | 1.8519 | 0.3821  | Low - High; Medium - High;<br>Low - Medium | NM_004660    | BROAD Institute lincRNA (XLOC_I2_012524), lincRNA [TCONS_I2_00024199]                                    |
| 185 | MAP7           |    | 9053      | 4.6101 | 0.014175 | 1.8485 | 0.38304 | Low - High; High - Medium;<br>Low - Medium | NM_003980    | Homo sapiens cDNA FLJ37626 fis, clone BRCOC2014748. [AK094945]                                           |
| 186 | HAGH           |    | 3029      | 4.5773 | 0.014579 | 1.8363 | 0.39062 | Low - High; Medium - High;<br>Low - Medium | NM_001040427 | Homo sapiens mRNA; cDNA DKFZp686J2011 (from clone DKFZp686J2011). [AL833160]                             |
| 187 | LOC100131510   |    | 100131510 | 4.5714 | 0.014652 | 1.8341 | 0.39062 | High - Low; High - Medium;<br>Low - Medium | XR_109960    | Homo sapiens Fc receptor-like 2 (FCRL2), mRNA [NM_030764]                                                |

|     |              |    |           |        |          |        |         |                                            |           |                                                                                                                                |
|-----|--------------|----|-----------|--------|----------|--------|---------|--------------------------------------------|-----------|--------------------------------------------------------------------------------------------------------------------------------|
| 188 | CA14         |    | 23632     | 4.5683 | 0.01469  | 1.833  | 0.39062 | Low - High; High - Medium;<br>Low - Medium | NM_012113 | Homo sapiens coiled-coil domain containing 144A (CCDC144A), mRNA [NM_014695]                                                   |
| 189 | XLOC_005981  | NA |           | 4.5403 | 0.015047 | 1.8225 | 0.398   | High - Low; High - Medium;<br>Medium - Low | BG434565  | full-length cDNA clone CSODC007YI01 of Neuroblastoma Cot 25-normalized of Homo sapiens (human) [CR604878]                      |
| 190 | CSNK1G2      |    | 1455      | 4.5141 | 0.015388 | 1.8128 | 0.4032  | Low - High; High - Medium;<br>Low - Medium | NM_001319 | Homo sapiens egf-like module containing, mucin-like, hormone receptor-like 4 pseudogene (EMR4P), non-coding RNA [NR_024075]    |
| 191 |              | NA |           | 4.5056 | 0.015501 | 1.8097 | 0.4032  | Low - High; Medium - High;<br>Low - Medium | AK093811  | Homo sapiens peptidoglycan recognition protein 1 (PGLYRP1), mRNA [NM_005091]                                                   |
| 192 | RNASE2       |    | 6036      | 4.5047 | 0.015513 | 1.8093 | 0.4032  | High - Low; High - Medium;<br>Medium - Low | NM_002934 | DB516369 RIKEN full-length enriched human cDNA library, testis Homo sapiens cDNA clone H013051C16 3', mRNA sequence [DB516369] |
| 193 | LOC100134391 | NA |           | 4.5006 | 0.015567 | 1.8078 | 0.4032  | Low - High; Medium - High;<br>Low - Medium | XR_109425 | Homo sapiens small Cajal body-specific RNA 6 (SCARNA6), guide RNA [NR_003006]                                                  |
| 194 | TNNI3        |    | 7137      | 4.4827 | 0.015808 | 1.8011 | 0.40601 | High - Low; High - Medium;<br>Medium - Low | NM_000363 | Homo sapiens ankyrin repeat domain 36B pseudogene 2 (ANKRD36BP2), non-coding RNA [NR_015424]                                   |
| 195 |              | NA |           | 4.4766 | 0.015891 | 1.7989 | 0.40601 | Low - High; Medium - High;<br>Low - Medium |           | Homo sapiens coiled-coil domain containing 64B (CCDC64B), mRNA [NM_001103175]                                                  |
| 196 | LOC100289090 |    | 100289090 | 4.4688 | 0.015998 | 1.7959 | 0.40601 | Low - High; High - Medium;<br>Low - Medium | AK057625  | Homo sapiens growth arrest and DNA-damage-inducible, gamma (GADD45G), mRNA [NM_006705]                                         |



|     |              |    |        |        |          |        |         |                                            |           |                                                                                                                                    |
|-----|--------------|----|--------|--------|----------|--------|---------|--------------------------------------------|-----------|------------------------------------------------------------------------------------------------------------------------------------|
| 197 | XLOC_004308  | NA |        | 4.4686 | 0.016    | 1.7959 | 0.40601 | High - Low; High - Medium;<br>Medium - Low |           | Homo sapiens purinergic receptor P2Y, G-protein coupled, 14 (P2RY14), transcript variant 2, mRNA [NM_014879]                       |
| 198 | TRAK2        |    | 66008  | 4.4493 | 0.016267 | 1.7887 | 0.40852 | High - Low; Medium - High;<br>Medium - Low | NM_015049 |                                                                                                                                    |
| 199 | DPYSL4       |    | 10570  | 4.4421 | 0.016369 | 1.786  | 0.40852 | Low - High; High - Medium;<br>Low - Medium | NM_006426 | Homo sapiens cDNA clone IMAGE:5498355. [BC110369]                                                                                  |
| 200 |              | NA |        | 4.4415 | 0.016377 | 1.7858 | 0.40852 | Low - High; Medium - High;<br>Low - Medium |           | Homo sapiens olfactory receptor, family 6, subfamily T, member 1 (OR6T1), mRNA [NM_001005187]                                      |
| 201 | XLOC_000377  | NA |        | 4.438  | 0.016426 | 1.7845 | 0.40852 | High - Low; Medium - High;<br>Medium - Low |           | Homo sapiens small proline-rich protein 2A (SPRR2A), mRNA [NM_005988]                                                              |
| 202 | XLOC_007868  | NA |        | 4.4304 | 0.016533 | 1.7816 | 0.40916 | Low - High; Medium - High;<br>Low - Medium |           | Homo sapiens MAX interactor 1 (MXI1), transcript variant 1, mRNA [NM_005962]                                                       |
| 203 |              | NA |        | 4.423  | 0.016639 | 1.7789 | 0.40974 | Low - High; Medium - High;<br>Low - Medium | AK097351  | BROAD Institute lincRNA (XLOC_I2_014694), lincRNA [TCONS_I2_00028604]                                                              |
| 204 | TNS1         |    | 7145   | 4.3762 | 0.017322 | 1.7614 | 0.42105 | Low - High; High - Medium;<br>Low - Medium | NM_022648 | Q1YA75_STAAU (Q1YA75) ABC transporter related, partial (5%) [THC2632354]                                                           |
| 205 | LOC339807    |    | 339807 | 4.3663 | 0.01747  | 1.7577 | 0.42105 | Low - High; High - Medium;<br>Low - Medium | NR_034023 | Homo sapiens MOCO sulphurase C-terminal domain containing 1 (MOSC1), nuclear gene encoding mitochondrial protein, mRNA [NM_022746] |
| 206 | LINC00230A   |    | 401630 | 4.3579 | 0.017597 | 1.7546 | 0.42105 | Low - High; Medium - High;<br>Medium - Low | NR_002161 | Homo sapiens cDNA FLJ43642 fis, clone STOMA2004925. [AK125630]                                                                     |
| 207 | LOC100506965 | NA |        | 4.3572 | 0.017608 | 1.7543 | 0.42105 | Low - High; Medium - High;<br>Low - Medium | XR_110300 | Homo sapiens leucine-rich repeats and death domain containing 1 (LRRD1), mRNA [NM_001161528]                                       |

|     |                |    |        |        |          |        |         |                                            |           |                                                                                                                                      |
|-----|----------------|----|--------|--------|----------|--------|---------|--------------------------------------------|-----------|--------------------------------------------------------------------------------------------------------------------------------------|
| 208 | PGF            |    | 5228   | 4.3542 | 0.017654 | 1.7532 | 0.42105 | Low - High; Medium - High;<br>Medium - Low | NM_002632 | Homo sapiens S-antigen;<br>retina and pineal gland<br>(arrestin) (SAG), mRNA<br>[NM_000541]                                          |
| 209 | XLOC_011719    | NA |        | 4.3409 | 0.017857 | 1.7482 | 0.42105 | Low - High; Medium - High;<br>Low - Medium |           | Homo sapiens T-cell<br>leukemia/lymphoma 1A<br>(TCL1A), transcript variant 1,<br>mRNA [NM_021966]                                    |
| 210 | VWA2           |    | 340706 | 4.3366 | 0.017924 | 1.7466 | 0.42105 | Low - High; High - Medium;<br>Low - Medium | NM_198496 | Homo sapiens HRAS-like<br>suppressor 2 (HRASLS2),<br>mRNA [NM_017878]                                                                |
| 211 | XLOC_l2_001496 | NA |        | 4.3363 | 0.017929 | 1.7464 | 0.42105 | High - Low; High - Medium;<br>Medium - Low |           | immunoglobulin heavy<br>constant delta [Source:HGNC<br>Symbol;Acc:5480]<br>[ENST00000390556]                                         |
| 212 | ORMDL3         |    | 94103  | 4.329  | 0.018042 | 1.7437 | 0.42105 | Low - High; High - Medium;<br>Low - Medium | NM_139280 | Homo sapiens fatty acid amide<br>hydrolase (FAAH), mRNA<br>[NM_001441]                                                               |
| 213 | LOC100506262   | NA |        | 4.3213 | 0.018162 | 1.7408 | 0.42105 | High - Low; Medium - High;<br>Medium - Low | XR_109925 | BROAD Institute lincRNA<br>(XLOC_005939), lincRNA<br>[TCNS_00012372]                                                                 |
| 214 | LOC145837      | NA |        | 4.3186 | 0.018204 | 1.7398 | 0.42105 | Low - High; High - Medium;<br>Low - Medium | NR_026979 | Homo sapiens X-prolyl<br>aminopeptidase<br>(aminopeptidase P) 3, putative<br>(XPNPEP3), transcript variant<br>2, mRNA [NM_001204827] |
| 215 | XLOC_006476    | NA |        | 4.3156 | 0.018251 | 1.7387 | 0.42105 | Low - High; Medium - High;<br>Low - Medium |           | Homo sapiens transmembrane<br>protein 146 (TMEM146),<br>mRNA [NM_152784]                                                             |
| 216 | XLOC_005810    | NA |        | 4.3154 | 0.018254 | 1.7387 | 0.42105 | High - Low; High - Medium;<br>Medium - Low |           | Homo sapiens uncharacterized<br>LOC145837 (LOC145837), non-<br>coding RNA [NR_026979]                                                |
| 217 | C5orf38        |    | 153571 | 4.309  | 0.018355 | 1.7363 | 0.42105 | High - Low; High - Medium;<br>Low - Medium | NM_178569 | Homo sapiens cDNA FLJ41456<br>fis, clone BRSTN2012320.<br>[AK123450]                                                                 |
| 218 | RNASE2         |    | 6036   | 4.3077 | 0.018375 | 1.7358 | 0.42105 | High - Low; High - Medium;<br>Medium - Low | NM_002934 | Homo sapiens interleukin 3<br>receptor, alpha (low affinity)<br>(IL3RA), mRNA [NM_002183]                                            |
| 219 | OBSCN          |    | 84033  | 4.3005 | 0.01849  | 1.7331 | 0.42105 | Low - High; Medium - High;<br>Low - Medium | NM_052843 | Homo sapiens claudin 5<br>(CLDN5), transcript variant 1,<br>mRNA [NM_001130861]                                                      |

|     |              |    |        |        |          |        |         |                                            |              |                                                                                                                                             |
|-----|--------------|----|--------|--------|----------|--------|---------|--------------------------------------------|--------------|---------------------------------------------------------------------------------------------------------------------------------------------|
| 220 | XLOC_004828  | NA |        | 4.298  | 0.01853  | 1.7321 | 0.42105 | Low - High; High - Medium;<br>Low - Medium |              | Homo sapiens uncharacterized LOC100134317 (LOC100134317), non-coding RNA [NR_029389]                                                        |
| 221 | UTY          |    | 7404   | 4.2918 | 0.01863  | 1.7298 | 0.4214  | Low - High; Medium - High;<br>Medium - Low | NM_007125    | Homo sapiens zinc finger, HIT-type containing 2 (ZNHIT2), mRNA [NM_014205]                                                                  |
| 222 | XLOC_002172  | NA |        | 4.2665 | 0.019041 | 1.7203 | 0.42603 | Low - High; High - Medium;<br>Low - Medium |              | BROAD Institute lincRNA (XLOC_007635), lincRNA [TCONS_00016263]                                                                             |
| 223 |              | NA |        | 4.2609 | 0.019132 | 1.7182 | 0.42603 | Low - High; Medium - High;<br>Low - Medium |              | Homo sapiens transglutaminase 2 (C polypeptide, protein-glutamine-gamma-glutamyltransferase) (TGM2), transcript variant 2, mRNA [NM_198951] |
| 224 | LOC100287633 | NA |        | 4.2595 | 0.019156 | 1.7177 | 0.42603 | Low - High; High - Medium;<br>Low - Medium | XM_002342728 | Q1YA75_STAAU (Q1YA75) ABC transporter related, partial (5%) [THC2632354]                                                                    |
| 225 | IER5L        |    | 389792 | 4.2584 | 0.019175 | 1.7173 | 0.42603 | Low - High; Medium - High;<br>Low - Medium | NM_203434    | Homo sapiens chromosome 1 open reading frame 190 (C1orf190), mRNA [NM_001013615]                                                            |
| 226 | HBE1         |    | 3046   | 4.2369 | 0.019534 | 1.7092 | 0.43094 | High - Low; High - Medium;<br>Low - Medium | NM_005330    | Homo sapiens chromosome 12 open reading frame 51 (C12orf51), mRNA [NM_001109662]                                                            |
| 227 | CSRNP1       |    | 64651  | 4.2348 | 0.019568 | 1.7084 | 0.43094 | Low - High; High - Medium;<br>Low - Medium | NM_033027    | Homo sapiens interleukin 5 receptor, alpha (IL5RA), transcript variant 3, mRNA [NM_175725]                                                  |
| 228 | UNC5C        |    | 8633   | 4.2285 | 0.019677 | 1.706  | 0.43142 | Low - High; Medium - High;<br>Low - Medium | NM_003728    | BROAD Institute lincRNA (XLOC_002996), lincRNA [TCONS_00006377]                                                                             |
| 229 |              | NA |        | 4.2113 | 0.019971 | 1.6996 | 0.43494 | Low - High; Medium - High;<br>Low - Medium | AJ315539     | Homo sapiens ataxia, cerebellar, Cayman type (ATCAY), mRNA [NM_033064]                                                                      |

|     |             |    |        |        |          |        |         |                                            |           |                                                                                                    |
|-----|-------------|----|--------|--------|----------|--------|---------|--------------------------------------------|-----------|----------------------------------------------------------------------------------------------------|
| 230 | XLOC_007868 | NA |        | 4.209  | 0.020011 | 1.6987 | 0.43494 | Low - High; Medium - High;<br>Low - Medium |           | Homo sapiens cysteine-rich secretory protein LCCL domain containing 2 (CRISPLD2), mRNA [NM_031476] |
| 231 | NOTCH2NL    |    | 388677 | 4.1999 | 0.02017  | 1.6953 | 0.43648 | Low - High; Medium - High;<br>Low - Medium | AK075065  |                                                                                                    |
| 232 | PRR5        |    | 55615  | 4.1859 | 0.020415 | 1.69   | 0.4399  | Low - High; Medium - High;<br>Low - Medium | NM_015366 | Homo sapiens G protein-coupled receptor 141 (GPR141), mRNA [NM_181791]                             |
| 233 | CYP1B1-AS1  | NA |        | 4.1684 | 0.020726 | 1.6835 | 0.44468 | High - Low; High - Medium;<br>Medium - Low | NR_027252 | Homo sapiens HLA complex group 18 (non-protein coding) (HCG18), non-coding RNA [NR_024052]         |
| 234 | TSIX        | NA |        | 4.1596 | 0.020885 | 1.6802 | 0.44617 | High - Low; High - Medium;<br>Low - Medium | NR_003255 | Homo sapiens regulator of G-protein signaling 14 (RGS14), mRNA [NM_006480]                         |
| 235 | THPO        |    | 7066   | 4.1319 | 0.021393 | 1.6697 | 0.45096 | Low - High; Medium - High;<br>Low - Medium | NM_000460 | Homo sapiens BMS1 pseudogene 1 (BMS1P1), non-coding RNA [NR_026566]                                |
| 236 | HEBP1       |    | 50865  | 4.127  | 0.021484 | 1.6679 | 0.45096 | High - Low; Medium - High;<br>Medium - Low | NM_015987 | Homo sapiens leucine rich repeat containing 14 (LRR14), mRNA [NM_014665]                           |
| 237 | XLOC_009567 | NA |        | 4.1259 | 0.021505 | 1.6675 | 0.45096 | Low - High; Medium - High;<br>Low - Medium |           |                                                                                                    |
| 238 | HP          |    | 3240   | 4.1257 | 0.021509 | 1.6674 | 0.45096 | High - Low; High - Medium;<br>Medium - Low | NM_005143 | Homo sapiens neuralized homolog (Drosophila) (NEURL), mRNA [NM_004210]                             |
| 239 | XLOC_004093 | NA |        | 4.1229 | 0.02156  | 1.6663 | 0.45096 | Low - High; High - Medium;<br>Low - Medium |           |                                                                                                    |
| 240 | XLOC_012618 | NA |        | 4.1071 | 0.021857 | 1.6604 | 0.4551  | Low - High; Medium - High;<br>Low - Medium |           | Homo sapiens chromosome 7 open reading frame 68 (C7orf68), transcript variant 1, mRNA [NM_013332]  |
| 241 | XLOC_011924 | NA |        | 4.1028 | 0.02194  | 1.6588 | 0.4551  | Low - High; High - Medium;<br>Low - Medium | BI055436  | is39c09.y1 HR85 islet Homo sapiens cDNA clone IMAGE:6554705 5', mRNA sequence [CB178477]           |

|     |                |    |        |        |          |        |         |                                            |           |                                                                                                               |
|-----|----------------|----|--------|--------|----------|--------|---------|--------------------------------------------|-----------|---------------------------------------------------------------------------------------------------------------|
| 242 | XLOC_006338    | NA |        | 4.0939 | 0.02211  | 1.6554 | 0.45673 | High - Low; High - Medium;<br>Medium - Low |           | Homo sapiens Rho guanine nucleotide exchange factor (GEF) 4 (ARHGEF4), transcript variant 2, mRNA [NM_032995] |
| 243 | MSR1           |    | 4481   | 4.0817 | 0.022345 | 1.6508 | 0.45968 | High - Low; Medium - High;<br>Medium - Low | NM_138715 | BROAD Institute lincRNA (XLOC_002975), lincRNA [TCONS_00006356]                                               |
| 244 | HIST1H1D       |    | 3007   | 4.0748 | 0.02248  | 1.6482 | 0.46057 | Low - High; Medium - High;<br>Low - Medium | NM_005320 | ALU1_HUMAN (P39188) Alu subfamily J sequence contamination warning entry, partial (6%) [THC2539716]           |
| 245 | SESN3          |    | 143686 | 4.0664 | 0.022644 | 1.645  | 0.461   | Low - High; Medium - High;<br>Medium - Low | NM_144665 | Homo sapiens insulin-like growth factor binding protein 2, 36kDa (IGFBP2), mRNA [NM_000597]                   |
| 246 |                | NA |        | 4.0557 | 0.022857 | 1.641  | 0.461   | Low - High; Medium - High;<br>Low - Medium | AK129975  | Homo sapiens protease, serine, 36 (PRSS36), mRNA [NM_173502]                                                  |
| 247 | XLOC_I2_015752 | NA |        | 4.0552 | 0.022866 | 1.6408 | 0.461   | Low - High; High - Medium;<br>Low - Medium |           | Homo sapiens MAX dimerization protein 3 (MXD3), transcript variant 2, mRNA [NM_001142935]                     |
| 248 | LPPR4          |    | 9890   | 4.0514 | 0.022941 | 1.6394 | 0.461   | High - Low; Medium - High;<br>Medium - Low | NM_014839 |                                                                                                               |
| 249 | XLOC_I2_009468 | NA |        | 4.0465 | 0.02304  | 1.6375 | 0.461   | Low - High; High - Medium;<br>Low - Medium |           | Homo sapiens GDNF family receptor alpha 4 (GFRA4), transcript variant 2, mRNA [NM_145762]                     |
| 250 |                | NA |        | 4.0458 | 0.023055 | 1.6372 | 0.461   | Low - High; Medium - High;<br>Low - Medium |           | Homo sapiens chromosome 17 open reading frame 103 (C17orf103), mRNA [NM_152914]                               |
| 251 | LRG1           |    | 116844 | 4.0357 | 0.023257 | 1.6334 | 0.46267 | High - Low; High - Medium;<br>Medium - Low | NM_052972 |                                                                                                               |
| 252 | IRAK1          |    | 3654   | 4.0278 | 0.023418 | 1.6305 | 0.46267 | Low - High; Medium - High;<br>Low - Medium | NM_001569 | Homo sapiens coiled-coil domain containing 144A (CCDC144A), mRNA [NM_014695]                                  |
| 253 | LOC100653206   | NA |        | 4.024  | 0.023496 | 1.629  | 0.46267 | High - Low; High - Medium;<br>Medium - Low | XR_133524 | Homo sapiens TAO kinase 2 (TAOK2), transcript variant 1, mRNA [NM_016151]                                     |

|     |             |    |        |        |          |        |         |                                            |                                                                                                                                     |
|-----|-------------|----|--------|--------|----------|--------|---------|--------------------------------------------|-------------------------------------------------------------------------------------------------------------------------------------|
| 254 |             | NA |        | 4.0234 | 0.023508 | 1.6288 | 0.46267 | High - Low; High - Medium;<br>Medium - Low | Homo sapiens ubiquitin-conjugating enzyme E2O (UBE2O), mRNA [NM_022066]                                                             |
| 255 | XLOC_012575 | NA |        | 4.0174 | 0.023631 | 1.6265 | 0.46325 | Low - High; Medium - High;<br>Low - Medium | serpin peptidase inhibitor, clade A (alpha-1 antiproteinase, antitrypsin), member 1 [Source:HGNC Symbol;Acc:8941] [ENST00000402629] |
| 256 | MEX3D       |    | 399664 | 4.005  | 0.023887 | 1.6218 | 0.46644 | Low - High; High - Medium;<br>Low - Medium | NM_203304<br>Homo sapiens desmoplakin (DSP), transcript variant 1, mRNA [NM_004415]                                                 |
| 257 | GDF5        |    | 8200   | 3.9961 | 0.024074 | 1.6185 | 0.46827 | Low - High; Medium - High;<br>Low - Medium | NM_000557<br>Homo sapiens BCL2/adenovirus E1B 19kDa interacting protein 3-like (BNIP3L), mRNA [NM_004331]                           |
| 258 | CEBPE       |    | 1053   | 3.9831 | 0.024347 | 1.6136 | 0.47    | High - Low; Medium - High;<br>Medium - Low | NM_001805<br>Homo sapiens uncharacterized LOC399972 (FLJ39051), non-coding RNA [NR_033839]                                          |
| 259 | CREB5       |    | 9586   | 3.9799 | 0.024416 | 1.6123 | 0.47    | High - Low; High - Medium;<br>Medium - Low | NM_182898<br>Homo sapiens arginine-fifty homeobox (ARGFX), mRNA [NM_001012659]                                                      |
| 260 | SYCE3       |    | 644186 | 3.9763 | 0.024492 | 1.611  | 0.47    | High - Low; High - Medium;<br>Low - Medium | NM_001123225<br>Homo sapiens cholinergic receptor, muscarinic 4 (CHRM4), mRNA [NM_000741]                                           |
| 261 | XLOC_008609 | NA |        | 3.9718 | 0.024589 | 1.6093 | 0.47    | Low - High; High - Medium;<br>Low - Medium | Homo sapiens chromosome 2 open reading frame 63 (C2orf63), transcript variant 1, mRNA [NM_152385]                                   |
| 262 | XLOC_001362 | NA |        | 3.9627 | 0.024785 | 1.6058 | 0.47    | Low - High; Medium - High;<br>Low - Medium | Homo sapiens olfactory receptor, family 1, subfamily S, member 2 (OR1S2), mRNA [NM_001004459]                                       |
| 263 | XLOC_008527 | NA |        | 3.9545 | 0.024962 | 1.6027 | 0.47    | Low - High; High - Medium;<br>Low - Medium | BROAD Institute lincRNA (XLOC_001595), lincRNA [TCONS_00003800]                                                                     |

|     |                |    |           |        |          |        |      |                                            |              |                                                                                                              |
|-----|----------------|----|-----------|--------|----------|--------|------|--------------------------------------------|--------------|--------------------------------------------------------------------------------------------------------------|
| 264 | LOC151009      |    | 151009    | 3.9502 | 0.025057 | 1.6011 | 0.47 | Low - High; High - Medium;<br>Low - Medium | NR_027244    | Homo sapiens placenta-specific 8 (PLAC8), transcript variant 3, mRNA [NM_001130715]                          |
| 265 |                | NA |           | 3.9398 | 0.025284 | 1.5972 | 0.47 | Low - High; High - Medium;<br>Low - Medium | BX096650     | BROAD Institute lincRNA (XLOC_004828), lincRNA [TCONS_00009667]                                              |
| 266 | XLOC_I2_002767 | NA |           | 3.9397 | 0.025286 | 1.5971 | 0.47 | Low - High; High - Medium;<br>Low - Medium |              | Homo sapiens ankyrin repeat domain 20 family, member A5, pseudogene (ANKRD20A5P), non-coding RNA [NR_040113] |
| 267 | XLOC_002749    | NA |           | 3.9391 | 0.025301 | 1.5969 | 0.47 | Low - High; Medium - High;<br>Low - Medium |              | BROAD Institute lincRNA (XLOC_007868), lincRNA [TCONS_00016491]                                              |
| 268 | ZNF502         |    | 91392     | 3.9336 | 0.025421 | 1.5948 | 0.47 | Low - High; Medium - High;<br>Low - Medium | NM_033210    | PREDICTED: Homo sapiens arachidonate 15-lipoxygenase-like (LOC100652883), mRNA [XM_003403469]                |
| 269 | GGT8P          |    | 645367    | 3.9275 | 0.025557 | 1.5925 | 0.47 | Low - High; Medium - High;<br>Low - Medium | NR_003503    | Homo sapiens heparan sulfate (glucosamine) 3-O-sulfotransferase 1 (HS3ST1), mRNA [NM_005114]                 |
| 270 | SLC26A8        |    | 116369    | 3.9257 | 0.025598 | 1.5918 | 0.47 | High - Low; Medium - High;<br>Medium - Low | NM_052961    | BROAD Institute lincRNA (XLOC_002125), lincRNA [TCONS_00003303]                                              |
| 271 | ARGFX          |    | 503582    | 3.9193 | 0.02574  | 1.5894 | 0.47 | Low - High; High - Medium;<br>Low - Medium | NM_001012659 | Homo sapiens beta-defensin 131-like (LOC100129216), mRNA [NM_001242853]                                      |
| 272 | LOC100506533   |    | 100506533 | 3.9114 | 0.025918 | 1.5864 | 0.47 | High - Low; Medium - High;<br>Medium - Low | XM_003118505 | Homo sapiens flotillin 2 (FLOT2), mRNA [NM_004475]                                                           |
| 273 | OLIG1          |    | 116448    | 3.9112 | 0.025924 | 1.5863 | 0.47 | High - Low; Medium - High;<br>Medium - Low | NM_138983    | Homo sapiens uncharacterized LOC400804 (C1orf140), non-coding RNA [NR_024236]                                |
| 274 | ITGB2          |    | 3689      | 3.9051 | 0.026062 | 1.584  | 0.47 | High - Low; Medium - High;<br>Medium - Low |              | Homo sapiens DDHD domain containing 2 (DDHD2), transcript variant 3, mRNA [NM_001164234]                     |
| 275 | LENG8          |    | 114823    | 3.9016 | 0.026142 | 1.5827 | 0.47 | Low - High; Medium - High;<br>Low - Medium | NM_052925    | Homo sapiens paraneoplastic antigen like 6C (PNMA6C), mRNA [NM_001170944]                                    |

|     |            |       |        |          |        |      |                                            |           |                                                                                                                                                                  |
|-----|------------|-------|--------|----------|--------|------|--------------------------------------------|-----------|------------------------------------------------------------------------------------------------------------------------------------------------------------------|
| 276 | ZFY        | 7544  | 3.8987 | 0.026209 | 1.5816 | 0.47 | Low - High; Medium - High;<br>Low - Medium | NM_003411 | BROAD Institute lincRNA (XLOC_007219), lincRNA [TCONS_00014537]                                                                                                  |
| 277 | FCGBP      | 8857  | 3.8922 | 0.026358 | 1.5791 | 0.47 | Low - High; Medium - High;<br>Low - Medium | NM_003890 | Homo sapiens cDNA FLJ43625 fis, clone SPLEN2024127. [AK125613]                                                                                                   |
| 278 | SNORD3B-1  | 26851 | 3.8919 | 0.026365 | 1.579  | 0.47 | Low - High; Medium - High;<br>Medium - Low | NR_003271 | BROAD Institute lincRNA (XLOC_011570), lincRNA [TCONS_00023775]                                                                                                  |
| 279 | CAMP       | 820   | 3.8897 | 0.026416 | 1.5781 | 0.47 | High - Low; High - Medium;<br>Medium - Low | NM_004345 | guanylate cyclase 1, soluble, beta 2 [Source:HGNC Symbol;Acc:4686] [ENST00000389600]                                                                             |
| 280 | CEACAM8    | 1088  | 3.8803 | 0.026634 | 1.5746 | 0.47 | High - Low; High - Medium;<br>Medium - Low | NM_001816 | Homo sapiens ankyrin repeat domain 36 (ANKRD36), mRNA [NM_001164315]                                                                                             |
| 281 | ALPL       | 249   | 3.8781 | 0.026684 | 1.5737 | 0.47 | High - Low; Medium - High;<br>Medium - Low | NM_000478 | Homo sapiens epsin 2 (EPN2), transcript variant 2, mRNA [NM_014964]                                                                                              |
| 282 | NCRNA00185 | 55410 | 3.8738 | 0.026785 | 1.5721 | 0.47 | Low - High; Medium - High;<br>Medium - Low | NR_001544 | BROAD Institute lincRNA (XLOC_009790), lincRNA [TCONS_00020459]                                                                                                  |
| 283 | RNASE3     | 6037  | 3.8721 | 0.026825 | 1.5715 | 0.47 | High - Low; High - Medium;<br>Low - Medium | NM_002935 | BROAD Institute lincRNA (XLOC_013445), lincRNA [TCONS_00028489]                                                                                                  |
| 284 | LMOD1      | 25802 | 3.8706 | 0.02686  | 1.5709 | 0.47 | Low - High; Medium - High;<br>Low - Medium | NM_012134 | Homo sapiens adenylate cyclase 4 (ADCY4), transcript variant 3, mRNA [NM_001198568]                                                                              |
| 285 | NASP       | 4678  | 3.8678 | 0.026926 | 1.5698 | 0.47 | Low - High; High - Medium;<br>Low - Medium | NM_002482 | Homo sapiens progesterin and adiponectin receptor family member VI (PAQR6), transcript variant 1, mRNA [NM_024897]                                               |
| 286 | MOV10L1    | 54456 | 3.8663 | 0.026961 | 1.5693 | 0.47 | Low - High; Medium - High;<br>Low - Medium | NM_018995 | Q40PK4_DESAC (Q40PK4) IMP dehydrogenase/GMP reductase:Histidine kinase, HAMP region:Bacterial chemotaxis sensory transducer precursor, partial (3%) [THC2722577] |



|     |             |    |        |        |          |        |         |                                            |              |                                                                                                                    |
|-----|-------------|----|--------|--------|----------|--------|---------|--------------------------------------------|--------------|--------------------------------------------------------------------------------------------------------------------|
| 287 | XLOC_008586 | NA |        | 3.8648 | 0.026998 | 1.5687 | 0.47    | Low - High; High - Medium;<br>Low - Medium |              | Homo sapiens solute carrier family 16, member 14 (monocarboxylic acid transporter 14) (SLC16A14), mRNA [NM_152527] |
| 288 | NPPA        |    | 4878   | 3.8558 | 0.027211 | 1.5653 | 0.47    | Low - High; Medium - High;<br>Low - Medium |              | Homo sapiens HNF1A antisense RNA 1 (non-protein coding) (HNF1A-AS1), non-coding RNA [NR_024345]                    |
| 289 | XLOC_012145 | NA |        | 3.8524 | 0.02729  | 1.564  | 0.47    | Low - High; High - Medium;<br>Low - Medium |              | Homo sapiens transmembrane protein 164 (TMEM164), transcript variant 2, mRNA [NM_032227]                           |
| 290 | TUBB2A      |    | 7280   | 3.8467 | 0.027428 | 1.5618 | 0.47    | Low - High; Medium - High;<br>Medium - Low | NM_001069    |                                                                                                                    |
| 291 | LOC728190   |    | 728190 | 3.8456 | 0.027455 | 1.5614 | 0.47    | High - Low; Medium - High;<br>Medium - Low | NR_024397    | Homo sapiens tensin 1 (TNS1), mRNA [NM_022648]                                                                     |
| 292 | C1orf190    |    | 541468 | 3.8443 | 0.027486 | 1.5609 | 0.47    | Low - High; Medium - High;<br>Low - Medium | NM_001013615 | Q2NY92_XANOM (Q2NY92) Methyltransferase, partial (3%) [THC2714968]                                                 |
| 293 | TGFBR2      |    | 7048   | 3.8411 | 0.027562 | 1.5597 | 0.47    | Low - High; Medium - High;<br>Low - Medium | AJ786388     | Homo sapiens cDNA FLJ43093 fis, clone CORDB1000140. [AK125083]                                                     |
| 294 | MDGA1       |    | 266727 | 3.8378 | 0.027642 | 1.5584 | 0.47    | Low - High; Medium - High;<br>Low - Medium | AK126965     | Homo sapiens major facilitator superfamily domain containing 6-like (MFSD6L), mRNA [NM_152599]                     |
| 295 | CECR6       |    | 27439  | 3.8202 | 0.02807  | 1.5518 | 0.47359 | High - Low; High - Medium;<br>Medium - Low | NM_031890    | Homo sapiens nuclear receptor subfamily 4, group A, member 2 (NR4A2), mRNA [NM_006186]                             |
| 296 | CHRM4       |    | 1132   | 3.8141 | 0.028222 | 1.5494 | 0.47359 | High - Low; Medium - High;<br>Medium - Low | NM_000741    | RC0-GN0275-060201-032-g10 GN0275 Homo sapiens cDNA, mRNA sequence [BI055436]                                       |
| 297 | MORN1       |    | 79906  | 3.8125 | 0.028262 | 1.5488 | 0.47359 | Low - High; High - Medium;<br>Low - Medium |              | BROAD Institute lincRNA (XLOC_007868), lincRNA [TCONS_00016491]                                                    |

|     |              |    |       |        |          |        |         |                                            |           |                                                                                                                                                      |
|-----|--------------|----|-------|--------|----------|--------|---------|--------------------------------------------|-----------|------------------------------------------------------------------------------------------------------------------------------------------------------|
| 298 | PAQR6        |    | 79957 | 3.8106 | 0.028309 | 1.5481 | 0.47359 | High - Low; High - Medium;<br>Medium - Low | NM_024897 | Homo sapiens cannabinoid receptor 2 (macrophage) (CNR2), mRNA [NM_001841]                                                                            |
| 299 | XLOC_009123  | NA |       | 3.8065 | 0.028409 | 1.5465 | 0.47359 | High - Low; High - Medium;<br>Low - Medium | XR_111174 | Homo sapiens pyruvate dehydrogenase kinase, isozyme 2 (PDK2), nuclear gene encoding mitochondrial protein, transcript variant 4, mRNA [NM_001199900] |
| 300 | XLOC_014408  | NA |       | 3.8061 | 0.028421 | 1.5464 | 0.47359 | Low - High; Medium - High;<br>Low - Medium |           | Homo sapiens oviductal glycoprotein 1, 120kDa (OVGP1), mRNA [NM_002557]                                                                              |
| 301 | LOC100287225 | NA |       | 3.7906 | 0.02881  | 1.5405 | 0.47635 | Low - High; Medium - High;<br>Low - Medium | NR_040074 | CD69 molecule [Source:HGNC Symbol;Acc:1694] [ENST00000416624]                                                                                        |
| 302 | PRKDC        |    | 5591  | 3.7881 | 0.028871 | 1.5395 | 0.47635 | High - Low; High - Medium;<br>Medium - Low | NM_006904 | Homo sapiens WNK lysine deficient protein kinase 4 (WNK4), mRNA [NM_032387]                                                                          |
| 303 | ORM1         |    | 5004  | 3.7866 | 0.028911 | 1.5389 | 0.47635 | High - Low; High - Medium;<br>Medium - Low | NM_000607 | Homo sapiens olfactomedin 4 (OLFM4), mRNA [NM_006418]                                                                                                |
| 304 | KCNG1        |    | 3755  | 3.7843 | 0.028968 | 1.5381 | 0.47635 | Low - High; Medium - High;<br>Medium - Low | NM_002237 | Homo sapiens dipeptidyl-peptidase 6, mRNA (cDNA clone IMAGE:5494573), complete cds. [BC035912]                                                       |
| 305 | FAAH         |    | 2166  | 3.769  | 0.02936  | 1.5322 | 0.48121 | Low - High; Medium - High;<br>Low - Medium | NM_001441 | BROAD Institute lincRNA (XLOC_004535), lincRNA [TCONS_00009501]                                                                                      |
| 306 | XLOC_002996  | NA |       | 3.7489 | 0.029884 | 1.5246 | 0.48772 | Low - High; Medium - High;<br>Low - Medium |           | Homo sapiens collagen, type XX, alpha 1 (COL20A1), mRNA [NM_020882]                                                                                  |
| 307 | XLOC_005900  | NA |       | 3.7379 | 0.030173 | 1.5204 | 0.48772 | High - Low; Medium - High;<br>Medium - Low | AK130765  | Homo sapiens alkaline phosphatase, liver/bone/kidney (ALPL), transcript variant 1, mRNA [NM_000478]                                                  |
| 308 | MIR22HG      |    | 84981 | 3.7368 | 0.030201 | 1.52   | 0.48772 | Low - High; Medium - High;<br>Low - Medium | NR_028502 |                                                                                                                                                      |

|     |                |    |        |        |          |        |         |                                            |           |                                                                                                     |
|-----|----------------|----|--------|--------|----------|--------|---------|--------------------------------------------|-----------|-----------------------------------------------------------------------------------------------------|
| 309 | XLOC_I2_015892 | NA |        | 3.7351 | 0.030248 | 1.5193 | 0.48772 | Low - High; Medium - High;<br>Low - Medium |           | Homo sapiens gamma-glutamyltransferase 8 pseudogene (GGT8P), non-coding RNA [NR_003503]             |
| 310 | SYNJ2          |    | 8871   | 3.7339 | 0.030279 | 1.5189 | 0.48772 | Low - High; Medium - High;<br>Low - Medium | AK296242  | Homo sapiens keratin associated protein 19-2 (KRTAP19-2), mRNA [NM_181608]                          |
| 311 | TNNT1          |    | 7138   | 3.7315 | 0.030342 | 1.518  | 0.48772 | High - Low; High - Medium;<br>Medium - Low | NM_003283 | ALU1_HUMAN (P39188) Alu subfamily J sequence contamination warning entry, partial (7%) [THC2739199] |
| 312 | ADORA3         |    | 140    | 3.7264 | 0.030479 | 1.516  | 0.48835 | High - Low; High - Medium;<br>Medium - Low | NM_020683 | Homo sapiens coiled-coil domain containing 144A (CCDC144A), mRNA [NM_014695]                        |
| 313 | EGR3           |    | 1960   | 3.7072 | 0.030999 | 1.5087 | 0.49275 | Low - High; High - Medium;<br>Low - Medium | NM_004430 | Homo sapiens uncharacterized LOC100132987 (LOC100132987), non-coding RNA [NR_038985]                |
| 314 | EYA1           |    | 2138   | 3.7002 | 0.031189 | 1.506  | 0.49275 | Low - High; High - Medium;<br>Low - Medium | NM_000503 | BROAD Institute lincRNA (XLOC_I2_013963), lincRNA [TCONS_I2_00026845]                               |
| 315 | XLOC_001823    | NA |        | 3.6999 | 0.031197 | 1.5059 | 0.49275 | Low - High; Medium - High;<br>Medium - Low |           | Homo sapiens acyl-CoA thioesterase 11 (ACOT11), transcript variant 2, mRNA [NM_147161]              |
| 316 |                | NA |        | 3.6973 | 0.031269 | 1.5049 | 0.49275 | Low - High; Medium - High;<br>Low - Medium |           | Homo sapiens uncharacterized LOC339807 (LOC339807), non-coding RNA [NR_034023]                      |
| 317 | XLOC_I2_015855 | NA |        | 3.6971 | 0.031274 | 1.5048 | 0.49275 | Low - High; Medium - High;<br>Low - Medium |           | CR997556 RZPD no.9016 Homo sapiens cDNA clone RZPDp9016I2412 5', mRNA sequence [CR997556]           |
| 318 | ANKRD20A5P     |    | 440482 | 3.6945 | 0.031345 | 1.5038 | 0.49275 | High - Low; High - Medium;<br>Low - Medium | NR_040113 | Homo sapiens oligodendrocyte lineage transcription factor 2 (OLIG2), mRNA [NM_005806]               |
| 319 |                | NA |        | 3.6811 | 0.031718 | 1.4987 | 0.49705 | Low - High; High - Medium;<br>Low - Medium |           | Homo sapiens lysophosphatidylcholine acyltransferase 2 (LPCAT2), mRNA [NM_017839]                   |

|     |                |    |           |        |          |        |         |                                            |              |                                                                                                                                                           |
|-----|----------------|----|-----------|--------|----------|--------|---------|--------------------------------------------|--------------|-----------------------------------------------------------------------------------------------------------------------------------------------------------|
| 320 | LOC100288292   |    | 100288292 | 3.6767 | 0.031842 | 1.497  | 0.49743 | Low - High; Medium - High;<br>Low - Medium | XR_132538    | Q70J93_STRGR (Q70J93) NDP-3-ketoreductase, partial (6%) [THC2606101]                                                                                      |
| 321 | PANX2          |    | 56666     | 3.6639 | 0.032203 | 1.4921 | 0.5015  | High - Low; High - Medium;<br>Medium - Low | NM_052839    | Homo sapiens cDNA FLJ13279 fis, clone OVARC1001055, moderately similar to PRE-B CELL ENHANCING FACTOR PRECURSOR. [AK023341]                               |
| 322 | RFPL4A         |    | 342931    | 3.6468 | 0.032689 | 1.4856 | 0.50196 | Low - High; Medium - High;<br>Medium - Low | NM_001145014 | Homo sapiens unknown mRNA sequence. [AY010113]                                                                                                            |
| 323 | XLOC_I2_015212 | NA |           | 3.6453 | 0.032733 | 1.485  | 0.50196 | High - Low; High - Medium;<br>Medium - Low |              | Homo sapiens chromosome 19 open reading frame 59 (C19orf59), mRNA [NM_174918]                                                                             |
| 324 | RBM38          |    | 55544     | 3.6378 | 0.03295  | 1.4821 | 0.50196 | Low - High; Medium - High;<br>Medium - Low | NM_017495    | Homo sapiens cDNA FLJ43119 fis, clone CTONG3003179. [AK125109]                                                                                            |
| 325 |                | NA |           | 3.6377 | 0.032955 | 1.4821 | 0.50196 | Low - High; Medium - High;<br>Low - Medium | XR_132817    | PREDICTED: Homo sapiens hypothetical LOC100132046 (LOC100132046), miscRNA [XR_132817]                                                                     |
| 326 | VSIG10         |    | 54621     | 3.6324 | 0.033108 | 1.4801 | 0.50196 | High - Low; High - Medium;<br>Medium - Low | NM_019086    | Homo sapiens potassium voltage-gated channel, subfamily G, member 1 (KCNG1), mRNA [NM_002237]                                                             |
| 327 | NAT10          |    | 55226     | 3.6317 | 0.03313  | 1.4798 | 0.50196 | Low - High; Medium - High;<br>Low - Medium | NM_024662    | Homo sapiens zinc and ring finger 3 (ZNRF3), transcript variant 1, mRNA [NM_001206998]                                                                    |
| 328 | XLOC_I2_013963 | NA |           | 3.6306 | 0.033161 | 1.4794 | 0.50196 | Low - High; Medium - High;<br>Low - Medium |              | BC010854 amyloid beta A4 precursor protein-binding, family B, member 1, isoform delta E9 {Homo sapiens} (exp=-1; wgp=0; cg=0), partial (22%) [THC2503819] |

|     |              |    |       |        |          |        |         |                                            |              |                                                                                                                        |
|-----|--------------|----|-------|--------|----------|--------|---------|--------------------------------------------|--------------|------------------------------------------------------------------------------------------------------------------------|
| 329 | XLOC_012503  | NA |       | 3.6261 | 0.033292 | 1.4777 | 0.50196 | High - Low; Medium - High;<br>Medium - Low |              | amyloid beta (A4) precursor protein-binding, family A, member 2 [Source:HGNC Symbol;Acc:579] [ENST00000382938]         |
| 330 | XLOC_002125  | NA |       | 3.6206 | 0.033455 | 1.4755 | 0.50196 | Low - High; Medium - High;<br>Low - Medium | AL355732     |                                                                                                                        |
| 331 | ZNF646       |    | 9726  | 3.6153 | 0.033612 | 1.4735 | 0.50196 | Low - High; High - Medium;<br>Low - Medium | NM_014699    | BROAD Institute lincRNA (XLOC_000535), lincRNA [TCONS_00001250]                                                        |
| 332 | CAV1         |    | 857   | 3.612  | 0.033708 | 1.4723 | 0.50196 | Low - High; High - Medium;<br>Low - Medium | NM_001753    | Homo sapiens Fc fragment of IgG, high affinity Ib, receptor (CD64) (FCGR1B), transcript variant 1, mRNA [NM_001017986] |
| 333 | SPP1         |    | 6696  | 3.6076 | 0.033839 | 1.4706 | 0.50196 | High - Low; High - Medium;<br>Medium - Low | NM_001040058 | BROAD Institute lincRNA (XLOC_007895), lincRNA [TCONS_00016511]                                                        |
| 334 | FOXB1        |    | 27023 | 3.6048 | 0.033924 | 1.4695 | 0.50196 | Low - High; High - Medium;<br>Low - Medium | NM_012182    | Homo sapiens Kruppel-like factor 14 (KLF14), mRNA [NM_138693]                                                          |
| 335 | LGR6         |    | 59352 | 3.6039 | 0.033951 | 1.4691 | 0.50196 | Low - High; Medium - High;<br>Low - Medium | NM_001017403 | Homo sapiens indoleamine 2,3-dioxygenase 1 (IDO1), mRNA [NM_002164]                                                    |
| 336 | YOD1         |    | 55432 | 3.5968 | 0.034164 | 1.4664 | 0.50196 | High - Low; Medium - High;<br>Medium - Low | NM_018566    | HSU07000 breakpoint cluster region protein {Homo sapiens} (exp=-1; wgp=0; cg=0), partial (11%) [THC2481061]            |
| 337 | ATP6V0D1     |    | 9114  | 3.5958 | 0.034194 | 1.466  | 0.50196 | Low - High; Medium - High;<br>Low - Medium | AK125522     | Homo sapiens Vpr (HIV-1) binding protein (VPRBP), transcript variant 1, mRNA [NM_014703]                               |
| 338 | LOC100507195 | NA |       | 3.5897 | 0.03438  | 1.4637 | 0.50196 | High - Low; High - Medium;<br>Medium - Low | XR_110374    | Homo sapiens cDNA FLJ37669 fis, clone BRHIP2011891. [AK094988]                                                         |
| 339 | GRB10        |    | 2887  | 3.5846 | 0.034534 | 1.4617 | 0.50196 | High - Low; High - Medium;<br>Medium - Low | NM_001001555 | Homo sapiens unc-5 homolog C (C. elegans) (UNC5C), mRNA [NM_003728]                                                    |
| 340 | XLOC_002580  | NA |       | 3.5844 | 0.034539 | 1.4617 | 0.50196 | Low - High; Medium - High;<br>Low - Medium |              | Homo sapiens nuclear receptor subfamily 4, group A, member 3 (NR4A3), transcript variant 3, mRNA [NM_173200]           |

|     |             |    |        |        |          |        |         |                                            |              |                                                                                                                        |
|-----|-------------|----|--------|--------|----------|--------|---------|--------------------------------------------|--------------|------------------------------------------------------------------------------------------------------------------------|
| 341 | ACVRL1      |    | 94     | 3.5803 | 0.034666 | 1.4601 | 0.50196 | High - Low; High - Medium;<br>Medium - Low | NM_000020    | Homo sapiens double homeobox 4 (DUX4), mRNA [NM_033178]                                                                |
| 342 | XLOC_007407 | NA |        | 3.5766 | 0.034779 | 1.4587 | 0.50196 | Low - High; Medium - High;<br>Low - Medium |              | Homo sapiens CD248 molecule, endosialin (CD248), mRNA [NM_020404]                                                      |
| 343 | C10orf76    |    | 79591  | 3.5758 | 0.034803 | 1.4584 | 0.50196 | Low - High; Medium - High;<br>Low - Medium | NM_024541    | Homo sapiens small nucleolar RNA, H/ACA box 39 (SNORA39), small nucleolar RNA [NR_002972]                              |
| 344 |             | NA |        | 3.5753 | 0.034818 | 1.4582 | 0.50196 | Low - High; Medium - High;<br>Low - Medium | BC043420     | Homo sapiens transmembrane and coiled-coil domain family 2 (TMCC2), transcript variant 1, mRNA [NM_014858]             |
| 345 | NCAPH       |    | 23397  | 3.5696 | 0.034993 | 1.456  | 0.50196 | Low - High; Medium - High;<br>Low - Medium | NM_015341    | Homo sapiens carbonic anhydrase IV (CA4), mRNA [NM_000717]                                                             |
| 346 |             | NA |        | 3.5692 | 0.035008 | 1.4558 | 0.50196 | High - Low; Medium - High;<br>Medium - Low | AF495725     |                                                                                                                        |
| 347 | XLOC_004710 | NA |        | 3.5612 | 0.035256 | 1.4528 | 0.50196 | Low - High; High - Medium;<br>Low - Medium |              | PREDICTED: Homo sapiens hypothetical LOC100134391 (LOC100134391), miscRNA [XR_109425]                                  |
| 348 | XLOC_012594 | NA |        | 3.5562 | 0.03541  | 1.4509 | 0.50196 | Low - High; High - Medium;<br>Low - Medium |              | BROAD Institute lincRNA (XLOC_000751), lincRNA [TCONS_00001436]                                                        |
| 349 | XLOC_011104 | NA |        | 3.5536 | 0.035491 | 1.4499 | 0.50196 | High - Low; Medium - High;<br>Medium - Low | AX721190     | BROAD Institute lincRNA (XLOC_I2_015855), lincRNA [TCONS_I2_00030882]                                                  |
| 350 | TUBB8       |    | 347688 | 3.553  | 0.035511 | 1.4496 | 0.50196 | High - Low; Medium - High;<br>Medium - Low | NM_177987    | Homo sapiens Fc fragment of IgG, high affinity Ib, receptor (CD64) (FCGR1B), transcript variant 3, mRNA [NM_001244910] |
| 351 | FAM127B     |    | 26071  | 3.5523 | 0.035532 | 1.4494 | 0.50196 | High - Low; Medium - High;<br>Medium - Low | NM_001078172 | BROAD Institute lincRNA (XLOC_012166), lincRNA [TCONS_00025346]                                                        |
| 352 | C19orf59    |    | 199675 | 3.5494 | 0.035626 | 1.4482 | 0.50196 | High - Low; High - Medium;<br>Medium - Low | NM_174918    | ALU2_HUMAN (P39189) Alu subfamily SB sequence contamination warning entry, partial (15%) [THC2520829]                  |

|     |                |    |           |        |          |        |         |                                            |           |                                                                                                                                                                                                   |
|-----|----------------|----|-----------|--------|----------|--------|---------|--------------------------------------------|-----------|---------------------------------------------------------------------------------------------------------------------------------------------------------------------------------------------------|
| 353 | LOC100131820   |    | 100131820 | 3.5461 | 0.035727 | 1.447  | 0.50196 | Low - High; Medium - High;<br>Low - Medium | AK125613  | BROAD Institute lincRNA<br>(XLOC_007407), lincRNA<br>[TCONS_00016016]                                                                                                                             |
| 354 | XLOC_006277    | NA |           | 3.5408 | 0.035897 | 1.4449 | 0.50196 | High - Low; High - Medium;<br>Medium - Low |           | Homo sapiens non-SMC<br>condensin I complex, subunit<br>H (NCAPH), mRNA<br>[NM_015341]                                                                                                            |
| 355 | SLC41A3        |    | 54946     | 3.5405 | 0.035905 | 1.4448 | 0.50196 | Low - High; Medium - High;<br>Low - Medium | NM_017836 | BROAD Institute lincRNA<br>(XLOC_005082), lincRNA<br>[TCONS_00010555]                                                                                                                             |
| 356 | NOP56          | NA |           | 3.5402 | 0.035916 | 1.4447 | 0.50196 | High - Low; Medium - High;<br>Medium - Low | NM_006392 | Homo sapiens cDNA FLJ45013<br>fis, clone BRAWH3013508.<br>[AK126960]                                                                                                                              |
| 357 | XLOC_008015    | NA |           | 3.5377 | 0.035996 | 1.4437 | 0.50196 | High - Low; High - Medium;<br>Medium - Low |           | BROAD Institute lincRNA<br>(XLOC_003400), lincRNA<br>[TCONS_00007354]                                                                                                                             |
| 358 | XLOC_011081    | NA |           | 3.5371 | 0.036013 | 1.4435 | 0.50196 | High - Low; High - Medium;<br>Low - Medium | AK124327  | Homo sapiens uncharacterized<br>LOC100505978<br>(LOC100505978), non-coding<br>RNA [NR_038912]                                                                                                     |
| 359 | XLOC_I2_003666 | NA |           | 3.5283 | 0.036296 | 1.4401 | 0.50196 | Low - High; High - Medium;<br>Low - Medium |           | adenosine monophosphate<br>deaminase 3 [Source:HGNC<br>Symbol;Acc:470]<br>[ENST00000527261]                                                                                                       |
| 360 | CEP104         |    | 9731      | 3.5257 | 0.03638  | 1.4391 | 0.50196 | Low - High; Medium - High;<br>Low - Medium | BC050721  | Lymphocyte antigen 6<br>complex, locus<br>G6ELymphocyte antigen 6<br>complex, locus G6E, isoform<br>CRA_aUncharacterized protein<br>[Source:UniProtKB/TrEMBL;Ac<br>c:A2ABS3]<br>[ENST00000383417] |
| 361 | XLOC_002275    | NA |           | 3.5115 | 0.036839 | 1.4337 | 0.50196 | Low - High; High - Medium;<br>Low - Medium |           | Homo sapiens<br>oligodendrocyte transcription<br>factor 1 (OLIG1), mRNA<br>[NM_138983]                                                                                                            |

|     |              |    |           |        |          |        |         |                                            |           |                                                                                                                                                   |
|-----|--------------|----|-----------|--------|----------|--------|---------|--------------------------------------------|-----------|---------------------------------------------------------------------------------------------------------------------------------------------------|
| 362 | XLOC_000884  | NA |           | 3.5091 | 0.036916 | 1.4328 | 0.50196 | Low - High; High - Medium;<br>Low - Medium |           | BX331476 Homo sapiens<br>NEUROBLASTOMA COT 10-<br>NORMALIZED Homo sapiens<br>cDNA clone CS0DB006YM22 5-<br>PRIME, mRNA sequence<br>[BX331476]     |
| 363 | LOC728052    | NA |           | 3.5067 | 0.036995 | 1.4319 | 0.50196 | Low - High; Medium - High;<br>Low - Medium | XR_108619 | BROAD Institute lincRNA<br>(XLOC_008609), lincRNA<br>[TCONS_00018331]                                                                             |
| 364 | XLOC_007738  | NA |           | 3.4971 | 0.037311 | 1.4282 | 0.50196 | Low - High; Medium - High;<br>Low - Medium |           | BROAD Institute lincRNA<br>(XLOC_002263), lincRNA<br>[TCONS_00004378]                                                                             |
| 365 | NASP         | NA |           | 3.4958 | 0.037354 | 1.4277 | 0.50196 | Low - High; High - Medium;<br>Low - Medium | NM_002482 | BROAD Institute lincRNA<br>(XLOC_007974), lincRNA<br>[TCONS_00017163]                                                                             |
| 366 | CCDC144A     |    | 9720      | 3.4929 | 0.03745  | 1.4265 | 0.50196 | Low - High; Medium - High;<br>Low - Medium | NM_014695 | Homo sapiens 3-<br>hydroxymethyl-3-<br>methylglutaryl-CoA lyase-like<br>1 (HMGCLL1), transcript<br>variant 1, mRNA [NM_019036]                    |
| 367 | TUBB2A       |    | 7280      | 3.4918 | 0.037485 | 1.4261 | 0.50196 | Low - High; Medium - High;<br>Medium - Low | NM_001069 | Homo sapiens 1-<br>aminocyclopropane-1-<br>carboxylate synthase homolog<br>(Arabidopsis)(non-functional)-<br>like (ACCSL), mRNA<br>[NM_001031854] |
| 368 | RNF182       |    | 221687    | 3.4893 | 0.037569 | 1.4252 | 0.50196 | High - Low; Medium - High;<br>Medium - Low | NM_152737 |                                                                                                                                                   |
| 369 | XLOC_003405  | NA |           | 3.4871 | 0.037645 | 1.4243 | 0.50196 | Low - High; Medium - High;<br>Low - Medium |           | Q9V7K8_DROME (Q9V7K8)<br>CG15706-PA (RE36877p),<br>partial (5%) [THC2675915]                                                                      |
| 370 | LOC100507540 | NA |           | 3.4795 | 0.037897 | 1.4214 | 0.50196 | High - Low; Medium - High;<br>Medium - Low | XR_108989 | Homo sapiens killer cell<br>immunoglobulin-like receptor,<br>two domains, long cytoplasmic<br>tail, 5A (KIR2DL5A), mRNA<br>[NM_020535]            |
| 371 | LOC100506342 |    | 100506342 | 3.4656 | 0.038369 | 1.416  | 0.50196 | Low - High; High - Medium;<br>Low - Medium | XR_108862 | Homo sapiens glutathione S-<br>transferase theta 1 (GSTT1),<br>mRNA [NM_000853]                                                                   |



|     |                |    |        |        |          |        |         |                                            |              |                                                                                                                                    |
|-----|----------------|----|--------|--------|----------|--------|---------|--------------------------------------------|--------------|------------------------------------------------------------------------------------------------------------------------------------|
| 372 | ZNF385C        | NA |        | 3.4641 | 0.038419 | 1.4155 | 0.50196 | Low - High; High - Medium;<br>Low - Medium | NM_001242704 | solute carrier family 25,<br>member 37 [Source:HGNC<br>Symbol;Acc:29786]<br>[ENST00000519973]                                      |
| 373 | SRRM3          |    | 222183 | 3.4623 | 0.03848  | 1.4148 | 0.50196 | Low - High; High - Medium;<br>Low - Medium | NM_001110199 | Homo sapiens WDNM1-like<br>pseudogene (LOC645638), non-<br>coding RNA [NR_030732]                                                  |
| 374 |                | NA |        | 3.4586 | 0.038606 | 1.4133 | 0.50196 | Low - High; High - Medium;<br>Low - Medium |              | Homo sapiens RAB2B,<br>member RAS oncogene family<br>(RAB2B), transcript variant 1,<br>mRNA [NM_032846]                            |
| 375 | XLOC_I2_008609 | NA |        | 3.4542 | 0.038755 | 1.4117 | 0.50196 | Low - High; High - Medium;<br>Low - Medium |              | Homo sapiens kringle<br>containing transmembrane<br>protein 1 (KREMEN1),<br>transcript variant 3, mRNA<br>[NM_001039570]           |
| 376 | XLOC_003194    | NA |        | 3.4529 | 0.038801 | 1.4112 | 0.50196 | Low - High; High - Medium;<br>Low - Medium |              | Homo sapiens Fc fragment of<br>IgG, high affinity Ib, receptor<br>(CD64) (FCGR1B), transcript<br>variant 3, mRNA<br>[NM_001244910] |
| 377 | RBM3           |    | 5935   | 3.4524 | 0.03882  | 1.4109 | 0.50196 | Low - High; Medium - High;<br>Low - Medium | NM_006743    | Homo sapiens HOX transcript<br>antisense RNA (non-protein<br>coding) (HOTAIR), antisense<br>RNA [NR_003716]                        |
| 378 |                | NA |        | 3.448  | 0.03897  | 1.4093 | 0.50196 | Low - High; High - Medium;<br>Low - Medium |              | Homo sapiens growth<br>differentiation factor 5 (GDF5),<br>mRNA [NM_000557]                                                        |
| 379 | PLK3           |    | 1263   | 3.4434 | 0.039129 | 1.4075 | 0.50196 | Low - High; High - Medium;<br>Low - Medium | NM_004073    | BROAD Institute lincRNA<br>(XLOC_I2_000037), lincRNA<br>[TCONS_I2_00000066]                                                        |
| 380 |                | NA |        | 3.4418 | 0.039184 | 1.4069 | 0.50196 | Low - High; Medium - High;<br>Low - Medium | AK093943     | Homo sapiens chromosome 5<br>open reading frame 38<br>(C5orf38), mRNA<br>[NM_178569]                                               |
| 381 | SLC6A10P       |    | 386757 | 3.4412 | 0.039204 | 1.4067 | 0.50196 | Low - High; Medium - High;<br>Medium - Low | NR_003083    | BROAD Institute lincRNA<br>(XLOC_005780), lincRNA<br>[TCONS_00012221]                                                              |
| 382 | DACH1          |    | 1602   | 3.4379 | 0.039322 | 1.4054 | 0.50196 | High - Low; High - Medium;<br>Medium - Low | NM_080759    | BROAD Institute lincRNA<br>(XLOC_I2_015212), lincRNA<br>[TCONS_I2_00029343]                                                        |

|     |                |    |        |        |          |        |         |                                            |              |                                                                                                                      |
|-----|----------------|----|--------|--------|----------|--------|---------|--------------------------------------------|--------------|----------------------------------------------------------------------------------------------------------------------|
| 383 | HRC            |    | 3270   | 3.4379 | 0.039322 | 1.4054 | 0.50196 | Low - High; Medium - High;<br>Low - Medium | NM_002152    | Homo sapiens testis-specific transcript, Y-linked 10 (non-protein coding) (TTY10), non-coding RNA [NR_001542]        |
| 384 | XLOC_005731    | NA |        | 3.4339 | 0.039462 | 1.4038 | 0.50196 | Low - High; High - Medium;<br>Low - Medium |              | BROAD Institute lincRNA (XLOC_004375), lincRNA [TCONS_00009956]                                                      |
| 385 | XLOC_000762    | NA |        | 3.4326 | 0.039508 | 1.4033 | 0.50196 | Low - High; High - Medium;<br>Low - Medium | AA773613     | Uncharacterized protein cDNA FLJ40032 fis, clone STOMA2009256 [Source:UniProtKB/TrEMBL;Acc:Q8N843] [ENST00000358234] |
| 386 | XLOC_I2_010239 | NA |        | 3.4286 | 0.039645 | 1.4018 | 0.50196 | Low - High; High - Medium;<br>Low - Medium |              | Homo sapiens nitrogen permease regulator-like 3 (S. cerevisiae) (NPRL3), transcript variant 2, mRNA [NM_001039476]   |
| 387 | LOC100507948   | NA |        | 3.4284 | 0.039653 | 1.4017 | 0.50196 | Low - High; Medium - High;<br>Low - Medium | XR_112445    | Homo sapiens solute carrier family 26, member 8 (SLC26A8), transcript variant 1, mRNA [NM_052961]                    |
| 388 | FXYS5          |    | 53827  | 3.425  | 0.039774 | 1.4004 | 0.50196 | Low - High; High - Medium;<br>Low - Medium |              | PREDICTED: Homo sapiens hypothetical LOC100128262 (LOC100128262), miscRNA [XR_110396]                                |
| 389 | ERAP1          |    | 51752  | 3.4185 | 0.040004 | 1.3979 | 0.50196 | High - Low; High - Medium;<br>Medium - Low | NM_001040458 | BROAD Institute lincRNA (XLOC_004710), lincRNA [TCONS_00010248]                                                      |
| 390 | BEST2          |    | 54831  | 3.4166 | 0.04007  | 1.3972 | 0.50196 | Low - High; High - Medium;<br>Low - Medium | NM_017682    | Homo sapiens family with sequence similarity 129, member C (FAM129C), transcript variant 2, mRNA [NM_001098524]      |
| 391 |                | NA |        | 3.4163 | 0.040081 | 1.3971 | 0.50196 | Low - High; Medium - High;<br>Low - Medium |              | Homo sapiens cDNA FLJ45121 fis, clone BRAWH3036077. [AK127064]                                                       |
| 392 | LYG2           |    | 254773 | 3.4148 | 0.040135 | 1.3965 | 0.50196 | Low - High; High - Medium;<br>Low - Medium | AF323919     | Homo sapiens CDC42 effector protein (Rho GTPase binding) 1 (CDC42EP1), mRNA [NM_152243]                              |

|     |              |    |        |        |          |        |         |                                            |              |                                                                                              |
|-----|--------------|----|--------|--------|----------|--------|---------|--------------------------------------------|--------------|----------------------------------------------------------------------------------------------|
| 393 | CCL3         |    | 6348   | 3.4129 | 0.040204 | 1.3957 | 0.50196 | Low - High; High - Medium;<br>Low - Medium | NM_002983    | Homo sapiens proline rich 5 (renal) (PRR5), transcript variant 2, mRNA [NM_015366]           |
| 394 | GABRA3       |    | 2556   | 3.4116 | 0.040249 | 1.3952 | 0.50196 | Low - High; Medium - High;<br>Low - Medium | NM_000808    | BROAD Institute lincRNA (XLOC_013981), lincRNA [TCONS_00029251]                              |
| 395 | LEPREL2      |    | 10536  | 3.4115 | 0.040253 | 1.3952 | 0.50196 | High - Low; High - Medium;<br>Low - Medium | NM_014262    | BROAD Institute lincRNA (XLOC_I2_002886), lincRNA [TCONS_I2_00005503]                        |
| 396 | LOC100505874 | NA |        | 3.4093 | 0.040333 | 1.3943 | 0.50196 | High - Low; High - Medium;<br>Medium - Low | XR_110950    | BROAD Institute lincRNA (XLOC_003839), lincRNA [TCONS_00008387]                              |
| 397 | LOC283688    | NA |        | 3.4074 | 0.040398 | 1.3936 | 0.50196 | Low - High; High - Medium;<br>Low - Medium | NR_033833    | PREDICTED: Homo sapiens protein FAM27E2-like (LOC100287633), mRNA [XM_002342728]             |
| 398 | TERC         |    | 7012   | 3.4033 | 0.040548 | 1.392  | 0.50196 | Low - High; Medium - High;<br>Low - Medium | NR_001566    | Homo sapiens tachykinin receptor 2 (TACR2), mRNA [NM_001057]                                 |
| 399 | LOC497256    |    | 497256 | 3.4013 | 0.040618 | 1.3913 | 0.50196 | Low - High; High - Medium;<br>Low - Medium | AK094988     | Homo sapiens microtubule-associated protein 7 (MAP7), transcript variant 4, mRNA [NM_003980] |
| 400 |              | NA |        | 3.3965 | 0.040795 | 1.3894 | 0.50196 | High - Low; High - Medium;<br>Medium - Low | AF058072     | Homo sapiens MAP7 domain containing 2 (MAP7D2), transcript variant 2, mRNA [NM_152780]       |
| 401 | OR6T1        |    | 219874 | 3.3943 | 0.040872 | 1.3886 | 0.50196 | High - Low; High - Medium;<br>Medium - Low | NM_001005187 | Homo sapiens uncharacterized LOC92659 (LOC92659), non-coding RNA [NR_015454]                 |
| 402 | C5AR1        |    | 728    | 3.3921 | 0.040954 | 1.3877 | 0.50196 | Low - High; Medium - High;<br>Low - Medium | NM_001736    | RST4038 Athersys RAGE Library Homo sapiens cDNA, mRNA sequence [BG185100]                    |
| 403 | FOXH1        |    | 8928   | 3.3916 | 0.040972 | 1.3875 | 0.50196 | Low - High; Medium - High;<br>Low - Medium | NM_003923    |                                                                                              |
| 404 | XLOC_001370  | NA |        | 3.3838 | 0.041256 | 1.3845 | 0.50196 | Low - High; Medium - High;<br>Low - Medium |              | Homo sapiens SH2 domain containing 2A (SH2D2A), transcript variant 5, mRNA [NM_001161444]    |
| 405 | GSPT1        |    | 2935   | 3.3815 | 0.041339 | 1.3836 | 0.50196 | Low - High; Medium - High;<br>Medium - Low | NM_002094    | Homo sapiens synaptogyrin 1 (SYNGR1), transcript variant 1a, mRNA [NM_004711]                |

|     |              |    |           |        |          |        |         |                                            |              |                                                                                                                                                   |
|-----|--------------|----|-----------|--------|----------|--------|---------|--------------------------------------------|--------------|---------------------------------------------------------------------------------------------------------------------------------------------------|
| 406 | MIAT         | NA |           | 3.3812 | 0.041351 | 1.3835 | 0.50196 | Low - High; Medium - High;<br>Low - Medium | NR_003491    | Homo sapiens E2F transcription factor 2 (E2F2), mRNA [NM_004091]                                                                                  |
| 407 | XLOC_003650  | NA |           | 3.3805 | 0.041379 | 1.3832 | 0.50196 | Low - High; High - Medium;<br>Low - Medium | CR742343     | Homo sapiens arginine-glutamic acid dipeptide (RE) repeats pseudogene 3 (REREP3), non-coding RNA [NR_033735]                                      |
| 408 | SERP2        |    | 387923    | 3.3805 | 0.041379 | 1.3832 | 0.50196 | Low - High; High - Medium;<br>Low - Medium | NM_001010897 | Homo sapiens obscurin, cytoskeletal calmodulin and titin-interacting RhoGEF (OBSCN), transcript variant 1, mRNA [NM_052843]                       |
| 409 | OSM          |    | 5008      | 3.379  | 0.041432 | 1.3827 | 0.50196 | Low - High; Medium - High;<br>Low - Medium | NM_020530    |                                                                                                                                                   |
| 410 | LOC100170939 |    | 100170939 | 3.3708 | 0.041735 | 1.3795 | 0.50196 | Low - High; Medium - High;<br>Low - Medium | NR_024054    | Homo sapiens acetyl-CoA carboxylase beta (ACACB), mRNA [NM_001093]                                                                                |
| 411 | CD24         |    | 100133941 | 3.366  | 0.041915 | 1.3776 | 0.50196 | High - Low; Medium - High;<br>Medium - Low | NM_013230    | Synthetic construct DNA, clone: pF1KE0822, Homo sapiens OLF1031 gene for olfactory receptor 1031, without stop codon, in Flexi system. [AB529253] |
| 412 | UBL4B        |    | 164153    | 3.359  | 0.042176 | 1.3749 | 0.50196 | Low - High; Medium - High;<br>Low - Medium | NM_203412    | Homo sapiens cystatin SA (CST2), mRNA [NM_001322]                                                                                                 |
| 413 | RNF24        |    | 11237     | 3.355  | 0.042325 | 1.3734 | 0.50196 | High - Low; High - Medium;<br>Medium - Low | NM_007219    | Q6P2F0_HUMAN (Q6P2F0) UEV3 protein, partial (39%) [THC2788642]                                                                                    |
| 414 | NFE4         |    | 58160     | 3.3464 | 0.04265  | 1.3701 | 0.50196 | High - Low; High - Medium;<br>Medium - Low | NM_001085386 | Synthetic construct Homo sapiens gateway clone IMAGE:100018551 3' read RAB35 mRNA. [CU677518]                                                     |
| 415 | LOC100129387 |    | 100129387 | 3.3464 | 0.042651 | 1.3701 | 0.50196 | Low - High; Medium - High;<br>Medium - Low | NR_024490    | Homo sapiens uncharacterized LOC100128252 (LOC100128252), transcript variant 2, non-coding RNA [NR_036522]                                        |
| 416 | TRIM10       |    | 10107     | 3.3459 | 0.042671 | 1.3699 | 0.50196 | Low - High; Medium - High;<br>Medium - Low | NM_052828    | Homo sapiens synaptonemal complex central element protein 3 (SYCE3), mRNA [NM_001123225]                                                          |

|     |              |    |           |        |          |        |         |                                            |           |                                                                                                                        |
|-----|--------------|----|-----------|--------|----------|--------|---------|--------------------------------------------|-----------|------------------------------------------------------------------------------------------------------------------------|
| 417 | LOC100129826 |    | 100129826 | 3.3434 | 0.042764 | 1.3689 | 0.50196 | Low - High; High - Medium;<br>Low - Medium | AK126915  | Homo sapiens chemokine (C-C motif) ligand 3 (CCL3), mRNA [NM_002983]                                                   |
| 418 | IGFBP2       |    | 3485      | 3.3426 | 0.042795 | 1.3686 | 0.50196 | High - Low; High - Medium;<br>Low - Medium | NM_000597 | Human MEN1 region clone epsilon/beta mRNA, 3' fragment. [AF001893]                                                     |
| 419 | DDX17        |    | 10521     | 3.3419 | 0.04282  | 1.3683 | 0.50196 | Low - High; Medium - High;<br>Low - Medium | NM_006386 | Homo sapiens guanylate binding protein 3 (GBP3), mRNA [NM_018284]                                                      |
| 420 | LRRN3        |    | 54674     | 3.3401 | 0.042892 | 1.3676 | 0.50196 | Low - High; Medium - High;<br>Low - Medium | NM_018334 | Homo sapiens keratin associated protein 4-12 (KRTAP4-12), mRNA [NM_031854]                                             |
| 421 | CBX7         |    | 23492     | 3.3357 | 0.04306  | 1.3659 | 0.50196 | Low - High; High - Medium;<br>Low - Medium | NM_175709 | BROAD Institute lincRNA (XLOC_012571), lincRNA [TCONS_00025761]                                                        |
| 422 | Q6LRY1       | NA |           | 3.3347 | 0.043096 | 1.3656 | 0.50196 | Low - High; High - Medium;<br>Low - Medium |           | Homo sapiens transmembrane protein 176B (TMEM176B), transcript variant 1, mRNA [NM_014020]                             |
| 423 | XLOC_007370  | NA |           | 3.3344 | 0.04311  | 1.3654 | 0.50196 | High - Low; High - Medium;<br>Medium - Low | BG187845  | Homo sapiens major histocompatibility complex, class II, DR beta 6 (pseudogene) (HLA-DRB6), non-coding RNA [NR_001298] |
| 424 | DNAL4        |    | 10126     | 3.3343 | 0.043113 | 1.3654 | 0.50196 | Low - High; High - Medium;<br>Low - Medium | NM_005740 | Homo sapiens zinc finger protein 839 pseudogene (LOC389906), non-coding RNA [NR_034031]                                |
| 425 | TTY10        |    | 246119    | 3.3335 | 0.043145 | 1.3651 | 0.50196 | Low - High; Medium - High;<br>Medium - Low | NR_001542 | BROAD Institute lincRNA (XLOC_007868), lincRNA [TCONS_00016491]                                                        |
| 426 | ADAM12       |    | 8038      | 3.3322 | 0.043195 | 1.3646 | 0.50196 | Low - High; High - Medium;<br>Low - Medium | NM_021641 | Homo sapiens heme binding protein 1 (HEBP1), mRNA [NM_015987]                                                          |
| 427 | NYX          |    | 60506     | 3.3321 | 0.043198 | 1.3645 | 0.50196 | Low - High; Medium - High;<br>Low - Medium | NM_022567 | Homo sapiens triggering receptor expressed on myeloid cells-like 1 (TREM1), mRNA [NM_178174]                           |
| 428 | FLJ42709     | NA |           | 3.3317 | 0.043211 | 1.3644 | 0.50196 | Low - High; Medium - High;<br>Low - Medium | NR_021490 | Homo sapiens kin of IRRE like (Drosophila) (KIRREL), mRNA [NM_018240]                                                  |

|     |             |    |        |        |          |        |         |                                            |              |                                                                                                               |
|-----|-------------|----|--------|--------|----------|--------|---------|--------------------------------------------|--------------|---------------------------------------------------------------------------------------------------------------|
| 429 | GYPC        |    | 2995   | 3.3313 | 0.043228 | 1.3642 | 0.50196 | Low - High; Medium - High;<br>Medium - Low | NM_002101    | BROAD Institute lincRNA (XLOC_009000), lincRNA [TCONS_00018649]                                               |
| 430 | SLC6A8      |    | 6535   | 3.3309 | 0.043244 | 1.3641 | 0.50196 | Low - High; Medium - High;<br>Medium - Low | NM_005629    | Homo sapiens POU class 4 homeobox 2 (POU4F2), mRNA [NM_004575]                                                |
| 431 | FAM182B     | NA |        | 3.3255 | 0.043452 | 1.362  | 0.50196 | Low - High; High - Medium;<br>Low - Medium | BX648489     | Homo sapiens long intergenic non-protein coding RNA 482 (LINC00482), non-coding RNA [NR_038080]               |
| 432 | ARHGEF10    |    | 9639   | 3.3202 | 0.043658 | 1.3599 | 0.50196 | Low - High; High - Medium;<br>Low - Medium | BC040474     | BROAD Institute lincRNA (XLOC_004093), lincRNA [TCONS_00008588]                                               |
| 433 | FLJ39051    | NA |        | 3.32   | 0.043665 | 1.3599 | 0.50196 | High - Low; High - Medium;<br>Medium - Low | NR_033839    |                                                                                                               |
| 434 | TPST1       |    | 8460   | 3.3197 | 0.043679 | 1.3597 | 0.50196 | High - Low; High - Medium;<br>Medium - Low | NM_003596    | Homo sapiens GDNF family receptor alpha 1 (GFRA1), transcript variant 1, mRNA [NM_005264]                     |
| 435 | DUX4L4      |    | 441056 | 3.3177 | 0.043754 | 1.359  | 0.50196 | Low - High; Medium - High;<br>Low - Medium | NM_001177376 | PREDICTED: Homo sapiens hypothetical LOC100506965 (LOC100506965), miscRNA [XR_110300]                         |
| 436 | LYRM2       |    | 57226  | 3.313  | 0.043938 | 1.3572 | 0.50196 | High - Low; Medium - High;<br>Medium - Low | NM_020466    | ab56g09.s1 Stratagene lung carcinoma 937218 Homo sapiens cDNA clone IMAGE:844864 3', mRNA sequence [AA773613] |
| 437 | XLOC_012831 | NA |        | 3.3124 | 0.04396  | 1.3569 | 0.50196 | Low - High; Medium - High;<br>Low - Medium | BC051727     | Homo sapiens cDNA FLJ59054 complete cds, highly similar to D(1B) dopamine receptor. [AK301306]                |
| 438 | LINC00260   |    | 84719  | 3.3119 | 0.04398  | 1.3567 | 0.50196 | Low - High; High - Medium;<br>Low - Medium | BC000988     | PREDICTED: Homo sapiens family with sequence similarity 27, member E3 (FAM27E3), mRNA [XM_001720463]          |
| 439 | XLOC_013557 | NA |        | 3.29   | 0.044848 | 1.3483 | 0.50762 | Low - High; Medium - High;<br>Low - Medium |              | Homo sapiens DEAD (Asp-Glu-Ala-Asp) box polypeptide 43 (DDX43), mRNA [NM_018665]                              |

|     |                |    |        |        |          |        |         |                                            |              |                                                                                                             |
|-----|----------------|----|--------|--------|----------|--------|---------|--------------------------------------------|--------------|-------------------------------------------------------------------------------------------------------------|
| 440 | IRF2BPL        |    | 64207  | 3.2857 | 0.04502  | 1.3466 | 0.50762 | Low - High; Medium - High;<br>Low - Medium | NM_024496    | Homo sapiens casein kinase 1, gamma 2 (CSNK1G2), mRNA [NM_001319]                                           |
| 441 | XLOC_I2_007184 | NA |        | 3.2852 | 0.04504  | 1.3464 | 0.50762 | Low - High; Medium - High;<br>Low - Medium | AK093290     | Homo sapiens membrane protein, palmitoylated 1, 55kDa (MPP1), transcript variant 3, mRNA [NM_001166461]     |
| 442 | EPB49          |    | 2039   | 3.2829 | 0.045134 | 1.3455 | 0.50762 | Low - High; Medium - High;<br>Medium - Low | NM_001978    | BROAD Institute lincRNA (XLOC_004188), lincRNA [TCONS_00008670]                                             |
| 443 | SMR3A          |    | 26952  | 3.2807 | 0.045222 | 1.3446 | 0.50762 | Low - High; Medium - High;<br>Low - Medium | NM_012390    | Homo sapiens progesterin and adipoQ receptor family member IX (PAQR9), mRNA [NM_198504]                     |
| 444 |                | NA |        | 3.2806 | 0.045226 | 1.3446 | 0.50762 | Low - High; High - Medium;<br>Low - Medium |              | PREDICTED: Homo sapiens hypothetical LOC100506546, transcript variant 2 (LOC100506546), miscRNA [XR_108325] |
| 445 | XLOC_011361    | NA |        | 3.2731 | 0.04553  | 1.3417 | 0.50762 | Low - High; High - Medium;<br>Low - Medium |              | Homo sapiens olfactory receptor, family 8, subfamily G, member 2 (OR8G2), mRNA [NM_001007249]               |
| 446 | LOC642947      |    | 642947 | 3.2713 | 0.045601 | 1.341  | 0.50762 | Low - High; High - Medium;<br>Low - Medium | BC132887     | Homo sapiens KN motif and ankyrin repeat domains 2 (KANK2), transcript variant 1, mRNA [NM_015493]          |
| 447 | HIST1H4J       |    | 8363   | 3.2677 | 0.045749 | 1.3396 | 0.50762 | Low - High; Medium - High;<br>Low - Medium | NM_021968    | PREDICTED: Homo sapiens double homeobox protein 4-like protein 4-like (LOC652119), mRNA [XM_001720798]      |
| 448 | XLOC_I2_001085 | NA |        | 3.2633 | 0.04593  | 1.3379 | 0.50762 | Low - High; Medium - High;<br>Medium - Low | AK090412     | BROAD Institute lincRNA (XLOC_I2_001421), lincRNA [TCONS_I2_00002836]                                       |
| 449 | SLC26A11       |    | 284129 | 3.2627 | 0.045951 | 1.3377 | 0.50762 | Low - High; High - Medium;<br>Low - Medium | NM_001166347 | BX096650 Soares_testis_NHT Homo sapiens cDNA clone IMAGp998C184111, mRNA sequence [BX096650]                |

|     |           |        |        |          |        |         |                                            |              |                                                                                                            |
|-----|-----------|--------|--------|----------|--------|---------|--------------------------------------------|--------------|------------------------------------------------------------------------------------------------------------|
| 450 | LOC400682 | 400682 | 3.2625 | 0.045963 | 1.3376 | 0.50762 | High - Low; High - Medium;<br>Medium - Low | XM_003118492 | BROAD Institute lincRNA (XLOC_009255), lincRNA [TCONS_00019107]                                            |
| 451 | CELA2B    | 51032  | 3.2615 | 0.046002 | 1.3372 | 0.50762 | Low - High; Medium - High;<br>Low - Medium | NM_015849    |                                                                                                            |
| 452 | GOLGA8A   | 23015  | 3.2611 | 0.046019 | 1.3371 | 0.50762 | Low - High; Medium - High;<br>Low - Medium | NM_181077    | Homo sapiens carcinoembryonic antigen-related cell adhesion molecule 18 (CEACAM18), mRNA [NM_001080405]    |
| 453 | C14orf45  | 80127  | 3.2515 | 0.046416 | 1.3333 | 0.50762 | Low - High; Medium - High;<br>Low - Medium | NM_025057    | Homo sapiens phosphodiesterase 2A, cGMP-stimulated (PDE2A), transcript variant 1, mRNA [NM_002599]         |
| 454 | SCARA3    | 51435  | 3.2436 | 0.046744 | 1.3303 | 0.50762 | Low - High; High - Medium;<br>Low - Medium | NM_016240    | Homo sapiens dachshund homolog 1 (Drosophila) (DACH1), transcript variant 1, mRNA [NM_080759]              |
| 455 | FLJ43681  | 388574 | 3.2433 | 0.046757 | 1.3302 | 0.50762 | High - Low; High - Medium;<br>Medium - Low | NR_029406    | UI-H-BW1-amz-e-06-0-UI.s2 NCI_CGAP_Sub7 Homo sapiens cDNA clone IMAGE:3071699 3', mRNA sequence [BF507452] |
| 456 | TAOK2     | 9344   | 3.243  | 0.046768 | 1.33   | 0.50762 | Low - High; High - Medium;<br>Low - Medium | NM_016151    | Homo sapiens haptoglobin-related protein (HPR), mRNA [NM_020995]                                           |
| 457 | ZDHHC23   | 254887 | 3.2426 | 0.046786 | 1.3299 | 0.50762 | Low - High; Medium - High;<br>Low - Medium | NM_173570    | Homo sapiens CD24 molecule (CD24), mRNA [NM_013230]                                                        |
| 458 | CRABP1    | 1381   | 3.2378 | 0.046984 | 1.3281 | 0.50762 | Low - High; Medium - High;<br>Low - Medium | NM_004378    | Homo sapiens tensin 1 (TNS1), mRNA [NM_022648]                                                             |
| 459 | PGM5      | 5239   | 3.2334 | 0.04717  | 1.3263 | 0.50762 | High - Low; High - Medium;<br>Medium - Low | NM_021965    | Homo sapiens peptidase inhibitor 16 (PI16), transcript variant 1, mRNA [NM_153370]                         |
| 460 | BPI       | 671    | 3.2148 | 0.047963 | 1.3191 | 0.50762 | High - Low; High - Medium;<br>Medium - Low | NM_001725    | Homo sapiens eyes absent homolog 1 (Drosophila) (EYA1), transcript variant 3, mRNA [NM_000503]             |
| 461 | REEP1     | 65055  | 3.2095 | 0.048187 | 1.3171 | 0.50762 | Low - High; High - Medium;<br>Low - Medium | NM_022912    | D80009 Start codon is not identified {Homo sapiens} (exp=-1; wgp=0; cg=0), partial (12%) [THC2480131]      |



|     |              |    |        |        |          |        |         |                                            |              |                                                                                                                                                                                                                                                                                     |
|-----|--------------|----|--------|--------|----------|--------|---------|--------------------------------------------|--------------|-------------------------------------------------------------------------------------------------------------------------------------------------------------------------------------------------------------------------------------------------------------------------------------|
| 462 | LOC100652730 | NA |        | 3.2095 | 0.048188 | 1.3171 | 0.50762 | Low - High; Medium - High;<br>Low - Medium | XR_132670    | ALG1_PONPY (Q5R7A2)<br>Chitobiosyldiphosphodolichol<br>beta-mannosyltransferase<br>(GDP-mannose-dolichol<br>diphosphochitobiose<br>mannosyltransferase) (GDP-<br>Man:GlcNAc2-PP-dolichol<br>mannosyltransferase) (Beta-<br>1,4-mannosyltransferase) ,<br>partial (14%) [THC2542402] |
| 463 |              | NA |        | 3.2086 | 0.048227 | 1.3167 | 0.50762 | High - Low; Medium - High;<br>Medium - Low | BC033643     | XM_797160 actin<br>{Trypanosoma cruzi strain CL<br>Brener} (exp=-1; wgp=0; cg=0),<br>partial (9%) [THC2707351]                                                                                                                                                                      |
| 464 | FBRS         |    | 64319  | 3.2078 | 0.048263 | 1.3164 | 0.50762 | Low - High; Medium - High;<br>Low - Medium | NM_001105079 | Q6CC74_YARLI (Q6CC74)<br>Similarity, partial (3%)<br>[THC2487722]                                                                                                                                                                                                                   |
| 465 | NCRNA00083   | NA |        | 3.2077 | 0.048266 | 1.3164 | 0.50762 | Low - High; Medium - High;<br>Low - Medium | XR_108314    | Homo sapiens homeobox A9<br>(HOXA9), mRNA [NM_152739]                                                                                                                                                                                                                               |
| 466 | PER1         |    | 5187   | 3.2074 | 0.048281 | 1.3162 | 0.50762 | Low - High; High - Medium;<br>Low - Medium | NM_002616    | Homo sapiens submaxillary<br>gland androgen regulated<br>protein 3A (SMR3A), mRNA<br>[NM_012390]                                                                                                                                                                                    |
| 467 | GBP3         |    | 2635   | 3.2058 | 0.048351 | 1.3156 | 0.50762 | High - Low; High - Medium;<br>Medium - Low | NM_018284    | 602506627F1 NIH_MGC_79<br>Homo sapiens cDNA clone<br>IMAGE:4603783 5', mRNA<br>sequence [BG434565]                                                                                                                                                                                  |
| 468 | LOC401109    | NA |        | 3.2035 | 0.048447 | 1.3147 | 0.50762 | Low - High; Medium - High;<br>Low - Medium | NR_034088    | HCG1981372, isoform<br>CRA_cNovel<br>proteinUncharacterized<br>protein<br>[Source:UniProtKB/TrEMBL;Ac<br>c:B1B108]<br>[ENST00000471090]                                                                                                                                             |
| 469 | ADCY4        |    | 196883 | 3.1973 | 0.048718 | 1.3123 | 0.50762 | Low - High; Medium - High;<br>Low - Medium | NM_001198568 | Homo sapiens mRNA; cDNA<br>DKFZp586J1922 (from clone<br>DKFZp586J1922) [AL110203]                                                                                                                                                                                                   |
| 470 |              | NA |        | 3.1966 | 0.04875  | 1.312  | 0.50762 | Low - High; High - Medium;<br>Low - Medium | AK021933     |                                                                                                                                                                                                                                                                                     |

|     |                |    |           |        |          |        |         |                                            |              |                                                                                                                    |
|-----|----------------|----|-----------|--------|----------|--------|---------|--------------------------------------------|--------------|--------------------------------------------------------------------------------------------------------------------|
| 471 | UCKL1          |    | 54963     | 3.1944 | 0.048845 | 1.3112 | 0.50762 | Low - High; Medium - High;<br>Low - Medium | NM_017859    | Homo sapiens monoglyceride lipase (MGLL), transcript variant 1, mRNA [NM_007283]                                   |
| 472 | XLOC_I2_004706 | NA |           | 3.189  | 0.049081 | 1.3091 | 0.50762 | Low - High; Medium - High;<br>Low - Medium |              | Homo sapiens BEN domain containing 7 (BEND7), transcript variant 1, mRNA [NM_152751]                               |
| 473 | ANKRD20A2      |    | 441430    | 3.1854 | 0.04924  | 1.3077 | 0.50762 | Low - High; Medium - High;<br>Medium - Low | NM_001012421 | BROAD Institute lincRNA (XLOC_000884), lincRNA [TCONS_00000554]                                                    |
| 474 | STAG3L2        |    | 442582    | 3.1849 | 0.049261 | 1.3075 | 0.50762 | Low - High; Medium - High;<br>Low - Medium | NR_040584    | Homo sapiens lactotransferrin (LTF), transcript variant 1, mRNA [NM_002343]                                        |
| 475 | LOC653075      |    | 653075    | 3.1823 | 0.049376 | 1.3065 | 0.50762 | Low - High; Medium - High;<br>Low - Medium | NR_033933    | Homo sapiens CKLF-like MARVEL transmembrane domain containing 5 (CMTM5), transcript variant 3, mRNA [NM_001037288] |
| 476 | ACTL7A         |    | 10881     | 3.1809 | 0.049438 | 1.3059 | 0.50762 | Low - High; Medium - High;<br>Low - Medium | NM_006687    | Homo sapiens chemokine (C-C motif) ligand 2 (CCL2), mRNA [NM_002982]                                               |
| 477 | HGFAC          |    | 3083      | 3.1782 | 0.049557 | 1.3049 | 0.50762 | Low - High; High - Medium;<br>Low - Medium | NM_001528    | Homo sapiens kringle containing transmembrane protein 1 (KREMEN1), transcript variant 2, mRNA [NM_032045]          |
| 478 |                | NA |           | 3.1771 | 0.049604 | 1.3045 | 0.50762 | Low - High; High - Medium;<br>Low - Medium | XR_109647    | BROAD Institute lincRNA (XLOC_006277), lincRNA [TCONS_00013611]                                                    |
| 479 | LOC100133286   |    | 100133286 | 3.1761 | 0.04965  | 1.3041 | 0.50762 | Low - High; Medium - High;<br>Low - Medium | NR_040084    | Homo sapiens uncharacterized LOC100190939 (LOC100190939), non-coding RNA [NR_024458]                               |
| 480 | LOC100129069   |    | 100129069 | 3.1747 | 0.049711 | 1.3036 | 0.50762 | Low - High; High - Medium;<br>Low - Medium | AK127359     | BROAD Institute lincRNA (XLOC_013744), lincRNA [TCONS_00028390]                                                    |
| 481 | LOC100288594   | NA |           | 3.1745 | 0.04972  | 1.3035 | 0.50762 | High - Low; Medium - High;<br>Medium - Low | XR_108779    | immunoglobulin heavy constant epsilon [Source:HGNC Symbol;Acc:5522] [ENST00000390541]                              |

|     |             |    |        |        |          |        |         |                                            |              |                                                                                                            |
|-----|-------------|----|--------|--------|----------|--------|---------|--------------------------------------------|--------------|------------------------------------------------------------------------------------------------------------|
| 482 | XLOC_001496 | NA |        | 3.1735 | 0.049764 | 1.3031 | 0.50762 | High - Low; High - Medium;<br>Medium - Low |              | Homo sapiens chemokine (C-C motif) receptor 2 (CCR2), transcript variant A, mRNA [NM_001123041]            |
| 483 | IL17REL     |    | 400935 | 3.1729 | 0.049792 | 1.3028 | 0.50762 | Low - High; Medium - High;<br>Low - Medium | NM_001001694 | BROAD Institute lincRNA (XLOC_008079), lincRNA [TCONS_00017468]                                            |
| 484 | SEPT7P2     | NA |        | 3.1721 | 0.04983  | 1.3025 | 0.50762 | Low - High; High - Medium;<br>Low - Medium | AK056032     | Homo sapiens leucine-rich alpha-2-glycoprotein 1 (LRG1), mRNA [NM_052972]                                  |
| 485 | ZAN         |    | 7455   | 3.1705 | 0.049899 | 1.3019 | 0.50762 | Low - High; Medium - High;<br>Low - Medium | NM_173059    | DA569430 HEMBA1 Homo sapiens cDNA clone HEMBA1002792 5', mRNA sequence [DA569430]                          |
| 486 | BPIFB2      |    | 80341  | 3.1702 | 0.049913 | 1.3018 | 0.50762 | Low - High; Medium - High;<br>Low - Medium | NM_025227    | Homo sapiens uncharacterized LOC100128252 (LOC100128252), transcript variant 2, non-coding RNA [NR_036522] |
| 487 | C9orf29     |    | 652972 | 3.1699 | 0.049924 | 1.3017 | 0.50762 | Low - High; Medium - High;<br>Low - Medium | NR_034087    | Homo sapiens chromosome 9 open reading frame 29 (C9orf29), non-coding RNA [NR_034087]                      |

|                  |     |
|------------------|-----|
| Total in Data 1  | 232 |
| Total in Data 2  | 487 |
| Unique in Data 1 | 232 |
| Unique in Data 2 | 422 |
| Common in both   | 6   |
