# Supplementary material for: Association between Arsenic Level, Gene Expression in Asian Population, and In Vitro Carcinogenic Bladder Tumor
Source: Hindawi journal article supplement (doi:10.1155/2022/3459855), 2022-01-01
Supplement: f8 [file 3459855.f8.pdf]

**Table S7. Significant pathways in Data1 (low, high concentrations) and Data2(low, medium, high concentrations), and the overlap between two (highlighted in pink).**

| Data1 |                                                   |               |          |                                                   |
|-------|---------------------------------------------------|---------------|----------|---------------------------------------------------|
| S.No. | Ingenuity Canonical Pathways                      | -log(p-value) | Ratio    | Molecules                                         |
| 1     | Neuropathic Pain Signaling In Dorsal Horn Neurons | 3.39E+00      | 5.94E-02 | GRIA4,ITPR1,PIK3C2B,PIK3R1,PLCG1,PRKCE            |
| 2     | Virus Entry via Endocytic Pathways                | 3.25E+00      | 5.61E-02 | FLNB,ITGB3,PIK3C2B,PIK3R1,PLCG1,PRKCE             |
| 3     | Macropinocytosis Signaling                        | 3.10E+00      | 6.58E-02 | ITGB3,PIK3C2B,PIK3R1,PLCG1,PRKCE                  |
| 4     | GP6 Signaling Pathway                             | 3.01E+00      | 5.04E-02 | FCER1G,ITGB3,ITPR1,PIK3C2B,PIK3R1,PRKCE           |
| 5     | CD28 Signaling in T Helper Cells                  | 2.99E+00      | 5.00E-02 | CARD11,FCER1G,ITPR1,PIK3C2B,PIK3R1,PLCG1          |
| 6     | NF-κB Activation by Viruses                       | 2.95E+00      | 6.10E-02 | ELP1,ITGB3,PIK3C2B,PIK3R1,PRKCE                   |
| 7     | HER-2 Signaling in Breast Cancer                  | 2.91E+00      | 5.95E-02 | ITGB3,PIK3C2B,PIK3R1,PLCG1,PRKCE                  |
| 8     | p70S6K Signaling                                  | 2.83E+00      | 4.65E-02 | EEF2K,IL4R,PIK3C2B,PIK3R1,PLCG1,PRKCE             |
| 9     | EGF Signaling                                     | 2.73E+00      | 7.27E-02 | ITPR1,PIK3C2B,PIK3R1,PLCG1                        |
| 10    | Iron homeostasis signaling pathway                | 2.70E+00      | 4.38E-02 | ATP6V0B,ATP6V0D1,ATP6V1F,CD163,SKP1,SMAD5         |
| 11    | Apelin Cardiomyocyte Signaling Pathway            | 2.59E+00      | 5.05E-02 | ITPR1,PIK3C2B,PIK3R1,PLCG1,PRKCE                  |
| 12    | Gap Junction Signaling                            | 2.53E+00      | 3.54E-02 | GRIA4,ITPR1,PIK3C2B,PIK3R1,PLCG1,PRKCE,TUBA1B     |
| 13    | Thrombopoietin Signaling                          | 2.52E+00      | 6.35E-02 | PIK3C2B,PIK3R1,PLCG1,PRKCE                        |
| 14    | Calcium-induced T Lymphocyte Apoptosis            | 2.44E+00      | 6.06E-02 | FCER1G,ITPR1,PLCG1,PRKCE                          |
| 15    | ErbB4 Signaling                                   | 2.42E+00      | 5.97E-02 | PIK3C2B,PIK3R1,PLCG1,PRKCE                        |
| 16    | iCOS-iCOSL Signaling in T Helper Cells            | 2.38E+00      | 4.50E-02 | FCER1G,ITPR1,PIK3C2B,PIK3R1,PLCG1                 |
| 17    | eNOS Signaling                                    | 2.38E+00      | 3.77E-02 | ITPR1,LPAR4,PIK3C2B,PIK3R1,PLCG1,PRKCE            |
| 18    | Growth Hormone Signaling                          | 2.33E+00      | 5.63E-02 | PIK3C2B,PIK3R1,PLCG1,PRKCE                        |
| 19    | Non-Small Cell Lung Cancer Signaling              | 2.29E+00      | 5.48E-02 | ITPR1,PIK3C2B,PIK3R1,PLCG1                        |
| 20    | Fc Epsilon RI Signaling                           | 2.28E+00      | 4.27E-02 | FCER1G,PIK3C2B,PIK3R1,PLCG1,PRKCE                 |
| 21    | Renin-Angiotensin Signaling                       | 2.27E+00      | 4.24E-02 | ITPR1,PIK3C2B,PIK3R1,PLCG1,PRKCE                  |
| 22    | Glioma Invasiveness Signaling                     | 2.27E+00      | 5.41E-02 | ITGB3,PIK3C2B,PIK3R1,TIMP1                        |
| 23    | Erythropoietin Signaling                          | 2.22E+00      | 5.26E-02 | PIK3C2B,PIK3R1,PLCG1,PRKCE                        |
| 24    | GDNF Family Ligand-Receptor Interactions          | 2.22E+00      | 5.26E-02 | ITPR1,PIK3C2B,PIK3R1,PLCG1                        |
| 25    | CCR3 Signaling in Eosinophils                     | 2.18E+00      | 4.03E-02 | CCR3,ITPR1,PIK3C2B,PIK3R1,PRKCE                   |
| 26    | Phagosome Formation                               | 2.16E+00      | 4.00E-02 | FCER1G,PIK3C2B,PIK3R1,PLCG1,PRKCE                 |
| 27    | 14-3-3-mediated Signaling                         | 2.13E+00      | 3.94E-02 | PIK3C2B,PIK3R1,PLCG1,PRKCE,TUBA1B                 |
| 28    | P2Y Purigenic Receptor Signaling Pathway          | 2.13E+00      | 3.94E-02 | ITGB3,PIK3C2B,PIK3R1,PLCG1,PRKCE                  |
| 29    | Prolactin Signaling                               | 2.13E+00      | 4.94E-02 | PIK3C2B,PIK3R1,PLCG1,PRKCE                        |
| 30    | Glycogen Degradation III                          | 2.12E+00      | 1.43E-01 | AGL,GAA                                           |
| 31    | Role of NFAT in Regulation of the Immune Response | 2.11E+00      | 3.31E-02 | ELP1,FCER1G,ITPR1,PIK3C2B,PIK3R1,PLCG1            |
| 32    | VEGF Family Ligand-Receptor Interactions          | 2.07E+00      | 4.76E-02 | PIK3C2B,PIK3R1,PLCG1,PRKCE                        |
| 33    | FGF Signaling                                     | 2.07E+00      | 4.76E-02 | ITPR1,PIK3C2B,PIK3R1,PLCG1                        |
| 34    | Insulin Secretion Signaling Pathway               | 2.06E+00      | 2.88E-02 | EIF2S1,INSR,ITPR1,PIK3C2B,PIK3R1,PLCG1,PRKCE      |
| 35    | Adipogenesis pathway                              | 2.04E+00      | 3.73E-02 | CDK5,DGKD,KAT2A,RBBP4,SMAD5                       |
| 36    | Endothelin-1 Signaling                            | 2.03E+00      | 3.19E-02 | ITPR1,PIK3C2B,PIK3R1,PLCG1,PNPLA8,PRKCE           |
| 37    | Th2 Pathway                                       | 2.01E+00      | 3.68E-02 | ACVR1C,CCR3,IL4R,PIK3C2B,PIK3R1                   |
| 38    | Synaptogenesis Signaling Pathway                  | 1.99E+00      | 2.56E-02 | CDK5,EFNB2,GRIA4,ITPR1,PIK3C2B,PIK3R1,PLCG1,PRKCE |

|                  |     |
|------------------|-----|
| Total in Data 1  | 112 |
| Total in Data 2  | 45  |
| Common in both   | 14  |
| Unique in Data 1 | 98  |
| Unique in Data 2 | 31  |

|    |                                                             |          |          |                                                      |
|----|-------------------------------------------------------------|----------|----------|------------------------------------------------------|
| 39 | CTLA4 Signaling in Cytotoxic T Lymphocytes                  | 1.99E+00 | 4.49E-02 | FCER1G,PIK3C2B,PIK3R1,PLCG1                          |
| 40 | Leukocyte Extravasation Signaling                           | 1.94E+00 | 3.05E-02 | ITGB3,PIK3C2B,PIK3R1,PLCG1,PRKCE,TIMP1               |
| 41 | Amyloid Processing                                          | 1.92E+00 | 6.00E-02 | BACE2,CDK5,PRKCE                                     |
| 42 | ErbB Signaling                                              | 1.91E+00 | 4.26E-02 | PIK3C2B,PIK3R1,PLCG1,PRKCE                           |
| 43 | Neuregulin Signaling                                        | 1.88E+00 | 4.17E-02 | CDK5,PIK3R1,PLCG1,PRKCE                              |
| 44 | UVB-Induced MAPK Signaling                                  | 1.88E+00 | 5.77E-02 | PIK3C2B,PIK3R1,PRKCE                                 |
| 45 | Lymphotoxin $\beta$ Receptor Signaling                      | 1.85E+00 | 5.66E-02 | ELP1,PIK3C2B,PIK3R1                                  |
| 46 | Factors Promoting Cardiogenesis in Vertebrates              | 1.84E+00 | 3.33E-02 | ACVR1C,PLCG1,PRKCE,SMAD5,WNT10A                      |
| 47 | CREB Signaling in Neurons                                   | 1.84E+00 | 2.90E-02 | GRIA4,ITPR1,PIK3C2B,PIK3R1,PLCG1,PRKCE               |
| 48 | Nitric Oxide Signaling in the Cardiovascular System         | 1.83E+00 | 4.04E-02 | ITPR1,PIK3C2B,PIK3R1,PRKCE                           |
| 49 | VEGF Signaling                                              | 1.83E+00 | 4.04E-02 | EIF2S1,PIK3C2B,PIK3R1,PLCG1                          |
| 50 | Phagosome Maturation                                        | 1.83E+00 | 3.31E-02 | ATP6V0B,ATP6V0D1,ATP6V1F,CTSS,TUBA1B                 |
| 51 | Gustation Pathway                                           | 1.80E+00 | 3.25E-02 | ITPR1,TAS2R10,TAS2R14,TAS2R19,TAS2R20                |
| 52 | PKC $\theta$ Signaling in T Lymphocytes                     | 1.79E+00 | 3.23E-02 | CARD11,FCER1G,PIK3C2B,PIK3R1,PLCG1                   |
| 53 | AMPK Signaling                                              | 1.78E+00 | 2.80E-02 | EEF2K,HLTF,INSR,PIK3C2B,PIK3R1,RAB8A                 |
| 54 | Aldosterone Signaling in Epithelial Cells                   | 1.75E+00 | 3.16E-02 | ITPR1,PIK3C2B,PIK3R1,PLCG1,PRKCE                     |
| 55 | G $\alpha$ q Signaling                                      | 1.75E+00 | 3.16E-02 | ITPR1,PIK3C2B,PIK3R1,PLCG1,PRKCE                     |
| 56 | T Cell Receptor Signaling                                   | 1.74E+00 | 3.81E-02 | CARD11,PIK3C2B,PIK3R1,PLCG1                          |
| 57 | HOTAIR Regulatory Pathway                                   | 1.73E+00 | 3.12E-02 | DZIP3,PIK3C2B,PIK3R1,RBBP4,WNT10A                    |
| 58 | Sulfate Activation for Sulfonation                          | 1.72E+00 | 5.00E-01 | PAPSS2                                               |
| 59 | Dopamine-DARPP32 Feedback in cAMP Signaling                 | 1.70E+00 | 3.07E-02 | CDK5,ITPR1,KCNJ5,PLCG1,PRKCE                         |
| 60 | EIF2 Signaling                                              | 1.69E+00 | 2.68E-02 | EIF2S1,INSR,PIK3C2B,PIK3R1,RPL8,RPS27                |
| 61 | Tec Kinase Signaling                                        | 1.69E+00 | 3.05E-02 | FCER1G,PIK3C2B,PIK3R1,PLCG1,PRKCE                    |
| 62 | Glioma Signaling                                            | 1.68E+00 | 3.64E-02 | PIK3C2B,PIK3R1,PLCG1,PRKCE                           |
| 63 | Glioblastoma Multiforme Signaling                           | 1.68E+00 | 3.03E-02 | ITPR1,PIK3C2B,PIK3R1,PLCG1,WNT10A                    |
| 64 | HGF Signaling                                               | 1.67E+00 | 3.60E-02 | PIK3C2B,PIK3R1,PLCG1,PRKCE                           |
| 65 | Th1 and Th2 Activation Pathway                              | 1.62E+00 | 2.92E-02 | ACVR1C,CCR3,IL4R,PIK3C2B,PIK3R1                      |
| 66 | CD40 Signaling                                              | 1.62E+00 | 4.62E-02 | ELP1,PIK3C2B,PIK3R1                                  |
| 67 | Neuroinflammation Signaling Pathway                         | 1.61E+00 | 2.34E-02 | ACVR1C,BACE2,IDE,KCNJ5,PIK3C2B,PIK3R1,PLCG1          |
| 68 | fMLP Signaling in Neutrophils                               | 1.60E+00 | 3.45E-02 | ITPR1,PIK3C2B,PIK3R1,PRKCE                           |
| 69 | Hepatic Fibrosis Signaling Pathway                          | 1.60E+00 | 2.17E-02 | ACVR1C,ITGB3,PIK3C2B,PIK3R1,PLCG1,PRKCE,TIMP1,WNT10A |
| 70 | Role of Tissue Factor in Cancer                             | 1.59E+00 | 3.42E-02 | ITGB3,P4HB,PIK3C2B,PIK3R1                            |
| 71 | Huntington's Disease Signaling                              | 1.58E+00 | 2.53E-02 | CDK5,HIP1,ITPR1,PIK3C2B,PIK3R1,PRKCE                 |
| 72 | T Cell Exhaustion Signaling Pathway                         | 1.58E+00 | 2.86E-02 | ACVR1C,FCER1G,PIK3C2B,PIK3R1,PLCG1                   |
| 73 | Role of NANOG in Mammalian Embryonic Stem Cell Pluripotency | 1.57E+00 | 3.36E-02 | PIK3C2B,PIK3R1,SMAD5,WNT10A                          |
| 74 | Role of JAK1 and JAK3 in $\gamma$ c Cytokine Signaling      | 1.55E+00 | 4.35E-02 | IL4R,PIK3C2B,PIK3R1                                  |
| 75 | SPINK1 General Cancer Pathway                               | 1.55E+00 | 4.35E-02 | MT1H,PIK3C2B,PIK3R1                                  |
| 76 | Coenzyme A Biosynthesis                                     | 1.55E+00 | 3.33E-01 | COASY                                                |
| 77 | NF- $\kappa$ B Signaling                                    | 1.55E+00 | 2.79E-02 | CARD11,FCER1G,INSR,PIK3C2B,PIK3R1                    |
| 78 | Small Cell Lung Cancer Signaling                            | 1.52E+00 | 4.23E-02 | MAX,PIK3C2B,PIK3R1                                   |
| 79 | Heparan Sulfate Biosynthesis (Late Stages)                  | 1.52E+00 | 4.23E-02 | AARS1,CHST15,HS3ST1                                  |
| 80 | Role of p14/p19ARF in Tumor Suppression                     | 1.51E+00 | 6.90E-02 | PIK3C2B,PIK3R1                                       |
| 81 | Caveolar-mediated Endocytosis Signaling                     | 1.49E+00 | 4.11E-02 | FLNB,INSR,ITGB3                                      |
| 82 | Leptin Signaling in Obesity                                 | 1.47E+00 | 4.05E-02 | PIK3C2B,PIK3R1,PLCG1                                 |
| 83 | Molecular Mechanisms of Cancer                              | 1.47E+00 | 2.05E-02 | ARHGEF18,CDK5,MAX,PIK3C2B,PIK3R1,PRKCE,SMAD5,WNT10A  |

|              |                                                                                |                      |              |                                                            |
|--------------|--------------------------------------------------------------------------------|----------------------|--------------|------------------------------------------------------------|
| 84           | Endocannabinoid Neuronal Synapse Pathway                                       | 1.47E+00             | 3.12E-02     | GRIA4,ITPR1,KCNJ5,PLCG1                                    |
| 85           | Synaptic Long Term Depression                                                  | 1.46E+00             | 2.65E-02     | GRIA4,ITPR1,PLCG1,PNPLA8,PRKCE                             |
| 86           | NRF2-mediated Oxidative Stress Response                                        | 1.46E+00             | 2.65E-02     | DNAJA2,JUNB,PIK3C2B,PIK3R1,PRKCE                           |
| 87           | Angiopoietin Signaling                                                         | 1.46E+00             | 4.00E-02     | ELP1,PIK3C2B,PIK3R1                                        |
| 88           | Synaptic Long Term Potentiation                                                | 1.46E+00             | 3.10E-02     | GRIA4,ITPR1,PLCG1,PRKCE                                    |
| 89           | Reelin Signaling in Neurons                                                    | 1.46E+00             | 3.10E-02     | CDK5,ITGB3,PIK3C2B,PIK3R1                                  |
| 90           | G Protein Signaling Mediated by Tubby                                          | 1.46E+00             | 6.45E-02     | INSR,PLCG1                                                 |
| 91           | ILK Signaling                                                                  | 1.45E+00             | 2.63E-02     | FLNB,ITGB3,LIMS1,PIK3C2B,PIK3R1                            |
| 92           | Semaphorin Neuronal Repulsive Signaling Pathway                                | 1.45E+00             | 3.08E-02     | CDK5,PIK3C2B,PIK3R1,PLCG1                                  |
| 93           | Neurotrophin/TRK Signaling                                                     | 1.45E+00             | 3.95E-02     | PIK3C2B,PIK3R1,PLCG1                                       |
| 94           | RAR Activation                                                                 | 1.42E+00             | 2.58E-02     | HLTF,PIK3R1,PRKCE,RDH13,SMAD5                              |
| 95           | Heparan Sulfate Biosynthesis                                                   | 1.42E+00             | 3.85E-02     | AARS1,CHST15,HS3ST1                                        |
| 96           | IL-9 Signaling                                                                 | 1.41E+00             | 6.06E-02     | PIK3C2B,PIK3R1                                             |
| 97           | IL-3 Signaling                                                                 | 1.40E+00             | 3.80E-02     | PIK3C2B,PIK3R1,PRKCE                                       |
| 98           | Thyroid Cancer Signaling                                                       | 1.40E+00             | 3.80E-02     | INSR,PIK3C2B,PIK3R1                                        |
| 99           | Human Embryonic Stem Cell Pluripotency                                         | 1.40E+00             | 2.96E-02     | PIK3C2B,PIK3R1,SMAD5,WNT10A                                |
| 100          | Adrenomedullin signaling pathway                                               | 1.39E+00             | 2.54E-02     | ITPR1,MAX,PIK3C2B,PIK3R1,PLCG1                             |
| 101          | IL-17 Signaling                                                                | 1.39E+00             | 3.75E-02     | PIK3C2B,PIK3R1,TIMP1                                       |
| 102          | Axonal Guidance Signaling                                                      | 1.37E+00             | 1.86E-02     | CDK5,EFNB2,PIK3C2B,PIK3R1,PLCG1,PRKCE,SEMA4A,TUBA1B,WNT10A |
| 103          | PI3K Signaling in B Lymphocytes                                                | 1.37E+00             | 2.90E-02     | IL4R,ITPR1,PIK3R1,PLCG1                                    |
| 104          | LPS-stimulated MAPK Signaling                                                  | 1.36E+00             | 3.66E-02     | PIK3C2B,PIK3R1,PRKCE                                       |
| 105          | 2-ketoglutarate Dehydrogenase Complex                                          | 1.33E+00             | 2.00E-01     | DLST                                                       |
| 106          | Serine Biosynthesis                                                            | 1.33E+00             | 2.00E-01     | PSPH                                                       |
| 107          | Myo-inositol Biosynthesis                                                      | 1.33E+00             | 2.00E-01     | IMPA2                                                      |
| 108          | Type II Diabetes Mellitus Signaling                                            | 1.33E+00             | 2.82E-02     | INSR,PIK3C2B,PIK3R1,PRKCE                                  |
| 109          | HIPPO signaling                                                                | 1.32E+00             | 3.53E-02     | PATJ,SKP1,SMAD5                                            |
| 110          | IL-4 Signaling                                                                 | 1.32E+00             | 3.53E-02     | IL4R,PIK3C2B,PIK3R1                                        |
| 111          | PDGF Signaling                                                                 | 1.31E+00             | 3.49E-02     | PIK3C2B,PIK3R1,PLCG1                                       |
| 112          | Thrombin Signaling                                                             | 1.31E+00             | 2.40E-02     | ITPR1,PIK3C2B,PIK3R1,PLCG1,PRKCE                           |
|              | Data2                                                                          |                      |              |                                                            |
| <b>S.No.</b> | <b>Ingenuity Canonical Pathways</b>                                            | <b>-log(p-value)</b> | <b>Ratio</b> | <b>Molecules</b>                                           |
| 1            | Osteoarthritis Pathway                                                         | 3.49E+00             | 4.74E-02     | ACVRL1,ALPL,CREB5,CXCL8,GDF5,MMP9,NAMPT,PGF,PTGS2,SPP1     |
| 2            | ILK Signaling                                                                  | 3.20E+00             | 4.74E-02     | CREB5,DSP,FOS,ITGB2,ITGB4,MMP9,PGF,PIK3R6,PTGS2            |
| 3            | Atherosclerosis Signaling                                                      | 2.97E+00             | 5.51E-02     | CXCL8,ITGB2,MMP9,MSR1,ORM1,ORM2,TNFRSF12A                  |
| 4            | Acute Phase Response Signaling                                                 | 2.74E+00             | 4.47E-02     | C4BPA,CRABP1,FOS,HP,IRAK1,ORM1,ORM2,OSM                    |
| 5            | IL-8 Signaling                                                                 | 2.44E+00             | 4.00E-02     | CXCL8,FOS,IRAK1,ITGB2,MMP9,PGF,PIK3R6,PTGS2                |
| 6            | LXR/RXR Activation                                                             | 2.39E+00             | 4.96E-02     | HPR,MMP9,MSR1,ORM1,ORM2,PTGS2                              |
| 7            | Phagosome Formation                                                            | 2.33E+00             | 4.80E-02     | C5AR1,IGHG1,ITGB2,MSR1,PIK3R6,SCARA3                       |
| 8            | Role of Macrophages, Fibroblasts and Endothelial Cells in Rheumatoid Arthritis | 2.24E+00             | 3.21E-02     | C5AR1,CEBPE,CREB5,CXCL8,FOS,IGHG1,IRAK1,OSM,PGF,PIK3R6     |
| 9            | Granulocyte Adhesion and Diapedesis                                            | 2.13E+00             | 3.89E-02     | C5AR1,CCL3,CCL3L3,CXCL8,ITGB2,MMP19,MMP9                   |
| 10           | IGF-1 Signaling                                                                | 2.02E+00             | 4.81E-02     | FOS,GRB10,IGFBP2,PIK3R6,SFN                                |
| 11           | Agranulocyte Adhesion and Diapedesis                                           | 1.97E+00             | 3.63E-02     | C5AR1,CCL3,CCL3L3,CXCL8,ITGB2,MMP19,MMP9                   |
| 12           | Complement System                                                              | 1.97E+00             | 8.11E-02     | C4BPA,C5AR1,ITGB2                                          |
| 13           | Inhibition of Matrix Metalloproteases                                          | 1.91E+00             | 7.69E-02     | ADAM12,MMP19,MMP9                                          |

|    |                                                           |          |          |                                                     |
|----|-----------------------------------------------------------|----------|----------|-----------------------------------------------------|
| 14 | Neuroinflammation Signaling Pathway                       | 1.90E+00 | 3.01E-02 | CCL3,CREB5,CXCL8,FOS,GABRA3,IRAK1,MMP9,PIK3R6,PTGS2 |
| 15 | Caveolar-mediated Endocytosis Signaling                   | 1.89E+00 | 5.48E-02 | CAV1,FLOT2,ITGB2,ITGB4                              |
| 16 | Airway Pathology in Chronic Obstructive Pulmonary Disease | 1.80E+00 | 4.24E-02 | CXCL8,MMP9,ORM1,ORM2,OSM                            |
| 17 | Dermatan Sulfate Biosynthesis (Late Stages)               | 1.71E+00 | 6.52E-02 | CHST12,HS3ST1,SULT1A2                               |
| 18 | G1±i Signaling                                            | 1.70E+00 | 4.00E-02 | ADCY4,ADORA3,CAV1,CHRM4,RGS14                       |
| 19 | 14-3-3-mediated Signaling                                 | 1.67E+00 | 3.94E-02 | FOS,PIK3R6,SFN,TUBB2A,TUBB8                         |
| 20 | Chondroitin Sulfate Biosynthesis (Late Stages)            | 1.66E+00 | 6.25E-02 | CHST12,HS3ST1,SULT1A2                               |
| 21 | Estrogen Receptor Signaling                               | 1.66E+00 | 2.74E-02 | ADCY4,CAV1,CREB5,FOS,MMP19,MMP9,PGF,PIK3R6,PRKDC    |
| 22 | PDGF Signaling                                            | 1.65E+00 | 4.65E-02 | CAV1,FOS,PIK3R6,SYNJ2                               |
| 23 | Hematopoiesis from Pluripotent Stem Cells                 | 1.64E+00 | 6.12E-02 | CXCL8,IGHG1,IGLC1                                   |
| 24 | Role of IL-17A in Arthritis                               | 1.53E+00 | 5.56E-02 | CXCL8,PIK3R6,PTGS2                                  |
| 25 | Communication between Innate and Adaptive Immune Cells    | 1.50E+00 | 4.17E-02 | CCL3,CCL3L3,CXCL8,IGHG1                             |
| 26 | Chondroitin Sulfate Biosynthesis                          | 1.49E+00 | 5.36E-02 | CHST12,HS3ST1,SULT1A2                               |
| 27 | Bladder Cancer Signaling                                  | 1.49E+00 | 4.12E-02 | CXCL8,MMP19,MMP9,PGF                                |
| 28 | Clathrin-mediated Endocytosis Signaling                   | 1.47E+00 | 3.11E-02 | ITGB2,ITGB4,ORM1,ORM2,PGF,PIK3R6                    |
| 29 | p53 Signaling                                             | 1.47E+00 | 4.08E-02 | GADD45G,PIK3R6,PRKDC,SFN                            |
| 30 | VEGF Signaling                                            | 1.46E+00 | 4.04E-02 | EIF1AY,PGF,PIK3R6,SFN                               |
| 31 | Methylglyoxal Degradation I                               | 1.43E+00 | 3.33E-01 | HAGH                                                |
| 32 | Anandamide Degradation                                    | 1.43E+00 | 3.33E-01 | FAAH                                                |
| 33 | Dermatan Sulfate Biosynthesis                             | 1.43E+00 | 5.08E-02 | CHST12,HS3ST1,SULT1A2                               |
| 34 | Gap Junction Signaling                                    | 1.43E+00 | 3.03E-02 | ADCY4,CAV1,CSNK1G2,PIK3R6,TUBB2A,TUBB8              |
| 35 | IL-17A Signaling in Gastric Cells                         | 1.42E+00 | 8.00E-02 | CXCL8,FOS                                           |
| 36 | Colorectal Cancer Metastasis Signaling                    | 1.41E+00 | 2.77E-02 | ADCY4,FOS,MMP19,MMP9,PGF,PIK3R6,PTGS2               |
| 37 | Relaxin Signaling                                         | 1.40E+00 | 3.33E-02 | ADCY4,FOS,MMP9,PIK3R6,RLN1                          |
| 38 | Coronavirus Pathogenesis Pathway                          | 1.40E+00 | 3.33E-02 | CXCL8,FOS,PTGS2,RPS4Y1,RPS4Y2                       |
| 39 | Hepatic Fibrosis Signaling Pathway                        | 1.39E+00 | 2.45E-02 | BAMBI,CCL3,CREB5,CXCL8,FOS,IRAK1,PGF,PIK3R6,SPP1    |
| 40 | Thrombopoietin Signaling                                  | 1.36E+00 | 4.76E-02 | FOS,PIK3R6,THPO                                     |
| 41 | Virus Entry via Endocytic Pathways                        | 1.35E+00 | 3.74E-02 | CAV1,ITGB2,ITGB4,PIK3R6                             |
| 42 | Pancreatic Adenocarcinoma Signaling                       | 1.33E+00 | 3.67E-02 | MMP9,PGF,PIK3R6,PTGS2                               |
| 43 | CD40 Signaling                                            | 1.33E+00 | 4.62E-02 | FOS,PIK3R6,PTGS2                                    |
| 44 | eNOS Signaling                                            | 1.32E+00 | 3.14E-02 | ADCY4,CAV1,CHRM4,PGF,PIK3R6                         |
| 45 | HOTAIR Regulatory Pathway                                 | 1.31E+00 | 3.12E-02 | MMP19,MMP9,PIK3R6,RBM38,SPP1                        |
