# Supplementary material for: Association between Arsenic Level, Gene Expression in Asian Population, and In Vitro Carcinogenic Bladder Tumor
Source: Hindawi journal article supplement (doi:10.1155/2022/3459855), 2022-01-01
Supplement: f9 [file 3459855.f9.pdf]

**Table S8. Significant genes in Data-1 (Low Vs High) and Data-2 (low, medium, and high concentrations) and the overlap between various combinations.**

| Conditions                                            | total genes | Gene names     |
|-------------------------------------------------------|-------------|----------------|
| LowVsHigh_Data1-2, LowVsMed_Data1-2 MedVsHigh_Data1-2 | 4           | XLOC_012515    |
|                                                       |             | IL8            |
|                                                       |             | TNS1           |
|                                                       |             | MALAT1         |
| LoeVsHigh_Data1-1 LowVsHigh_Data1-2 LowVsMed_Data1-2  | 2           | ZDHHC23        |
|                                                       |             | C9orf40        |
| LoeVsHigh_Data1-1 LowVsHigh_Data1-2 MedVsHigh_Data1-2 | 2           | HS3ST1         |
|                                                       |             | DDHD2          |
| LoeVsHigh_Data1-1 LowVsMed_Data1-2 MedVsHigh_Data1-2  | 1           | PSPH           |
| LowVsHigh_Data1-2 LowVsMed_Data1-2                    | 315         |                |
|                                                       |             | C17orf103      |
|                                                       |             | LOC151009      |
|                                                       |             | KRTAP4-12      |
|                                                       |             | BTG2           |
|                                                       |             | XLOC_006924    |
|                                                       |             | PRSS33         |
|                                                       |             | LOC100289580   |
|                                                       |             | C9orf29        |
|                                                       |             | ADAM12         |
|                                                       |             | IRAK1          |
|                                                       |             | XLOC_008527    |
|                                                       |             | LOC100129534   |
|                                                       |             | LOC100134317   |
|                                                       |             | LGR6           |
|                                                       |             | RHOXF1         |
|                                                       |             | NLRC4          |
|                                                       |             | LOC100133612   |
|                                                       |             | XLOC_012503    |
|                                                       |             | NAT10          |
|                                                       |             | XLOC_011924    |
|                                                       |             | TGM2           |
|                                                       |             | NASP           |
|                                                       |             | CA14           |
|                                                       |             | XLOC_002996    |
|                                                       |             | CCL3L3         |
|                                                       |             | LINC00260      |
|                                                       |             | LOC100506437   |
|                                                       |             | XLOC_I2_015100 |
|                                                       |             | DACH1          |
|                                                       |             | CST7           |
|                                                       |             | ITGB4          |
|                                                       |             | LOC283688      |
|                                                       |             | CEACAM8        |

|                |
|----------------|
| SLC26A8        |
| BPIFB2         |
| FAM27E3        |
| XLOC_I2_002886 |
| C19orf25       |
| FAM182B        |
| XLOC_004800    |
| XLOC_011361    |
| LOC388630      |
| KIR2DL4        |
| C14orf56       |
| LOC286149      |
| LMF1           |
| XLOC_I2_013963 |
| DNAL4          |
| TERC           |
| XLOC_009192    |
| ZNHIT2         |
| FLJ42709       |
| XLOC_I2_013506 |
| BAMBI          |
| TNNI3          |
| MORN1          |
| NCRNA00083     |
| LOC389273      |
| OVGP1          |
| XLOC_004093    |
| ORMDL3         |
| C1orf190       |
| AKNA           |
| NEAT1          |
| XLOC_011719    |
| C17orf65       |
| FAM27A         |
| XLOC_007868    |
| LOC100506930   |
| XLOC_010366    |
| XLOC_000884    |
| PRR5           |
| NAALADL2       |
| EGR1           |
| VWA1           |
| NYX            |
| NCR2           |
| ACTR5          |
| RGS14          |
| C10orf76       |

|                |
|----------------|
| CPNE2          |
| XLOC_000683    |
| PHACTR1        |
| C2orf63        |
| SLC34A1        |
| XLOC_005981    |
| XLOC_009567    |
| HP             |
| FAAH           |
| XLOC_012145    |
| FLOT2          |
| CHRM4          |
| NPPA           |
| LOC100132356   |
| XLOC_002172    |
| ZAN            |
| SEC14L3        |
| EYA1           |
| CRABP1         |
| RRP7B          |
| HPR            |
| HMX2           |
| LOC645195      |
| XLOC_002802    |
| APBA2          |
| LOC339807      |
| LOC401320      |
| XLOC_I2_015752 |
| LOC399744      |
| EGR2           |
| CMA1           |
| LOC100287633   |
| UPK3B          |
| LOC497256      |
| XLOC_007895    |
| LPCAT2         |
| PGLYRP1        |
| CSNK1G2        |
| XLOC_I2_003666 |
| PRR25          |
| SYNJ2          |
| SPP1           |
| ANKDD1A        |
| GPR141         |
| BEND7          |
| PTGS2          |
| FLJ39051       |

|                |
|----------------|
| TAOK2          |
| IER5L          |
| WNK4           |
| XLOC_006670    |
| MSR1           |
| CYP4F12        |
| SURF4          |
| MEX3D          |
| CAMP           |
| OBSCN          |
| SFN            |
| LENG8          |
| SLC26A11       |
| LOC100506924   |
| LOC100507540   |
| G0S2           |
| CSRNP1         |
| UBL4B          |
| XLOC_002580    |
| MIAT           |
| INHBB          |
| LOC100133286   |
| C1orf140       |
| MIA            |
| LOC100134391   |
| AZU1           |
| XLOC_004308    |
| TNFRSF12A      |
| XLOC_000762    |
| CEP104         |
| XLOC_007770    |
| GPR88          |
| XLOC_001362    |
| LOC643802      |
| IRF2BPL        |
| XLOC_003462    |
| LOC642947      |
| CREB5          |
| FBR5           |
| XLOC_I2_011204 |
| XLOC_008079    |
| XLOC_I2_009468 |
| OR9A2          |
| ZNF333         |
| SMR3A          |
| SSX3           |
| NCAPH          |

|                |
|----------------|
| SHD            |
| XLOC_001686    |
| MDGA1          |
| UCKL1          |
| GRB10          |
| XLOC_I2_010239 |
| HOTAIR         |
| DOCK9          |
| GADD45G        |
| ZNF385C        |
| PP12719        |
| XLOC_012227    |
| XLOC_010065    |
| NAMPT          |
| XLOC_003194    |
| CRYAA          |
| XLOC_012165    |
| LOC391322      |
| LOC100507948   |
| XLOC_011570    |
| FLJ40434       |
| CA4            |
| XLOC_014393    |
| NOP56          |
| LAMB1          |
| XLOC_007738    |
| LYG2           |
| MOV10L1        |
| LOC100505978   |
| PLA2G5         |
| IL17REL        |
| NPC1L1         |
| FLJ43826       |
| UNC5C          |
| XLOC_008586    |
| SAMD11         |
| DOK3           |
| FOS            |
| XLOC_006193    |
| SHISA4         |
| ARHGEF4        |
| XLOC_006277    |
| CELA2B         |
| SCARA3         |
| CBX7           |
| CAV1           |
| ADORA3         |

|              |
|--------------|
| ACTL7A       |
| CYP1B1-AS1   |
| CHRFAM7A     |
| SYNE1        |
| MXD3         |
| HCG18        |
| C12orf51     |
| DUX4L4       |
| GALNT14      |
| PANX2        |
| GDF5         |
| KLF14        |
| XLOC_006188  |
| 1-Mar        |
| XLOC_012831  |
| ACBD4        |
| LOC100506342 |
| XLOC_002643  |
| XLOC_010730  |
| TBC1D7       |
| XLOC_013981  |
| SLC41A3      |
| XLOC_005900  |
| LOC100129196 |
| XLOC_007635  |
| XLOC_009356  |
| ABP1         |
| XLOC_003650  |
| XLOC_005731  |
| BEST2        |
| XLOC_014408  |
| KIRREL3      |
| BNIP3L       |
| HRC          |
| HEMGN        |
| XLOC_004188  |
| Q6LRY1       |
| ADCY4        |
| HILPDA       |
| LOC100288292 |
| LOC100129069 |
| LOC652119    |
| LOC145837    |
| STAG3L2      |
| FOXH1        |
| KCNQ3        |
| LOC731275    |

|                |
|----------------|
| ANKRD33        |
| XLOC_006476    |
| XLOC_006025    |
| FOSB           |
| XLOC_006638    |
| LOC100506220   |
| XLOC_I2_015562 |
| XLOC_I2_015855 |
| XLOC_013679    |
| XLOC_008609    |
| ZNF418         |
| XLOC_004828    |
| LCN2           |
| OR1S1          |
| IL28RA         |
| MIR22HG        |
| LOC401109      |
| LOC100652730   |
| HIST1H1D       |
| RBMV1B         |
| SERP2          |
| PIK3R6         |
| MMP19          |
| BPI            |
| CCL3           |
| HGFAC          |
| XLOC_012007    |
| CRISPLD2       |
| LOC100268168   |
| LOC100128714   |
| ARHGEF10       |
| TFF3           |
| XLOC_008151    |
| EVPL           |
| XLOC_I2_015532 |
| XLOC_012618    |
| STK17B         |
| RREP3          |
| LOC100129931   |
| LOC100652951   |
| ALPL           |
| XLOC_013826    |
| XLOC_001370    |
| C19orf59       |
| MMP9           |
| XLOC_006593    |
| 64 KCNG1       |

|                |
|----------------|
| XLOC_I2_004611 |
| UTY            |
| DSP            |
| TTY15          |
| XLOC_I2_013931 |
| FAM129C        |
| TXLNG2P        |
| XLOC_011248    |
| LINC00482      |
| LOC283663      |
| RAP1GAP2       |
| RPS4Y2         |
| GYPC           |
| XLOC_I2_015849 |
| RNASE2         |
| XLOC_I2_001085 |
| XLOC_008015    |
| RBM38          |
| LINC00230A     |
| LOC100128252   |
| TAGAP          |
| XLOC_I2_015178 |
| NOTCH2NL       |
| NPRL3          |
| LOC100506003   |
| HAGH           |
| GOLGA8A        |
| USP9Y          |
| FCRL2          |
| CCDC144A       |
| RPS4Y1         |
| OASL           |
| TSPAN5         |
| LOC100509121   |
| OPLAH          |
| BMS1P1         |
| TSIX           |
| ANKRD20A2      |
| XLOC_008323    |
| SNORD90        |
| RNASE3         |
| TCL1A          |
| MXI1           |
| DDX3Y          |
| XIST           |
| XPNPEP3        |
| LOC100129387   |



LoeVsHigh\_Data1-1 LowVsHigh\_Data1-2

LowVsMed\_Data1-2 MedVsHigh\_Data1-2

LoeVsHigh\_Data1-1 LowVsMed\_Data1-2

LowVsHigh\_Data1-2

|     |                |
|-----|----------------|
|     | GSPT1          |
|     | XLOC_008276    |
|     | XLOC_008185    |
|     | PRKY           |
|     | TRIM10         |
|     | LOC643072      |
|     | EIF1AY         |
|     | XLOC_I2_015892 |
|     | XLOC_001823    |
|     | GFRA1          |
|     | KDM5D          |
|     | PLAC8          |
|     | BMS1P5         |
|     | ZFY            |
|     | GABRA3         |
|     | LRRC14         |
| 2   | ATP6VOD1       |
|     | FCER1G         |
| 19  | ZNF646         |
|     | C5orf38        |
|     | XLOC_012571    |
|     | ANXA8L2        |
|     | XLOC_I2_013300 |
|     | SNORA74A       |
|     | LOC100506533   |
|     | MAP7           |
|     | DPYSL4         |
|     | ANKRD20A5P     |
|     | LOC100507254   |
|     | HEBP1          |
|     | TUBB2A         |
|     | HBE1           |
|     | XLOC_003400    |
|     | LOC728190      |
|     | TUBB8          |
|     | C4BPA          |
|     | PSPHP1         |
| 2   | SEMA4A         |
|     | SGCE           |
| 189 | ELMO2          |
|     | LOC100131702   |
|     | FAM153A        |
|     | ZSCAN18        |
|     | LOC100507803   |
|     | RTDR1          |
|     | HIST1H4J       |
|     | LOC653075      |

|                |
|----------------|
| XLOC_001406    |
| LOC100507131   |
| ZNF347         |
| STRADB         |
| ACVRL1         |
| CLCC1          |
| C5AR1          |
| HNF1A-AS1      |
| GPR37L1        |
| NT5M           |
| XLOC_I2_011227 |
| C14orf45       |
| XLOC_013796    |
| DNAH17         |
| PAQR6          |
| ANKRD35        |
| GGT8P          |
| LOC158863      |
| ORM1           |
| SNAR-D         |
| TRIM3          |
| THBS3          |
| NFE4           |
| XLOC_006338    |
| LOC100131820   |
| LOC155060      |
| XLOC_002125    |
| DNAH12         |
| USP10          |
| CAPN1          |
| TRIP12         |
| XLOC_001342    |
| ERAP1          |
| CHI3L1         |
| XLOC_I2_006196 |
| FCGBP          |
| TBXA2R         |
| LOC100506965   |
| C6orf105       |
| XLOC_009670    |
| TRAT1          |
| C5orf4         |
| LOC100505736   |
| SULT1A2        |
| XLOC_013557    |
| ATHL1          |
| LOC100507195   |

|                |
|----------------|
| MYBPH          |
| LOC340335      |
| XLOC_003772    |
| LOC100130916   |
| SFRP2          |
| LOC100190939   |
| ZNF502         |
| XLOC_I2_015212 |
| TTC24          |
| LOC642648      |
| CCR2           |
| VWCE           |
| LOC100507656   |
| LMOD1          |
| SUPT3H         |
| THPO           |
| TACR2          |
| MPP1           |
| XLOC_001745    |
| PLA2G4C        |
| FAM131C        |
| TMEM146        |
| OSM            |
| DUSP1          |
| LOC254896      |
| XLOC_I2_014757 |
| MRC2           |
| FCAR           |
| PRKDC          |
| XLOC_002473    |
| LOC100507218   |
| CHMP3          |
| VPRBP          |
| XLOC_I2_002194 |
| ANKRD36BP2     |
| RBM3           |
| KLC3           |
| XLOC_009898    |
| LOC283050      |
| XLOC_I2_010064 |
| XLOC_011346    |
| XLOC_001496    |
| BLK            |
| XLOC_012575    |
| LOC100287225   |
| HIST1H4K       |
| CCDC164        |

|                |
|----------------|
| XLOC_I2_001496 |
| CCDC64B        |
| RERE           |
| XLOC_001680    |
| ACSM5          |
| LGALS2         |
| LOC728431      |
| PDZK1IP1       |
| GPC4           |
| XLOC_005810    |
| LOC100505874   |
| LOC731424      |
| XPO6           |
| FAM153B        |
| PLEK2          |
| XLOC_003405    |
| XLOC_002749    |
| XLOC_003549    |
| KREMEN1        |
| TMPRSS5        |
| CLCN1          |
| XLOC_007370    |
| SNORA34        |
| FAM109B        |
| SZT2           |
| G6PD           |
| LOC100129034   |
| OR6T1          |
| LTF            |
| XLOC_012240    |
| XLOC_003240    |
| LOC100170939   |
| XLOC_001148    |
| RNF24          |
| HOXA9          |
| PRRC2A         |
| LOC100190986   |
| LRRN3          |
| DDX17          |
| BFSP1          |
| XLOC_007407    |
| GBP3           |
| CECR6          |
| NUDT13         |
| ATP6V1G2       |
| SNAR-B2        |
| LOC100505857   |

|                |
|----------------|
| TGFBR2         |
| ERVMER34-1     |
| PRDM5          |
| MTERFD2        |
| LOC100129726   |
| LRG1           |
| XLOC_011569    |
| TMEM145        |
| RORC           |
| ORM2           |
| PGM5           |
| UNC119         |
| ELMOD3         |
| LOC145216      |
| KLK1           |
| SNAR-G2        |
| SLC25A45       |
| NHSL2          |
| FAM181A        |
| XLOC_I2_011911 |
| LOC100653206   |
| TPST1          |
| LOC728052      |
| HOXD9          |
| XLOC_I2_007184 |
| LOC729175      |
| RN5-8S1        |
| CDC42EP1       |
| XLOC_006858    |
| Q3KR39         |
| KCNJ15         |
| VSIG10         |
| RUNDC3A        |
| LOC400682      |
| CFD            |
| NKIRAS2        |
| FLJ43681       |
| XLOC_I2_004706 |
| ACY3           |
| TNNT1          |
| KCNK16         |
| XLOC_004585    |
| FLJ34208       |
| XLOC_001998    |
| CTAGE10P       |
| CNTNAP1        |
| XLOC_012594    |

306

LowVsMed\_Data1-2

|                |
|----------------|
| XLOC_011104    |
| C11orf42       |
| CXCR4          |
| SEMG1          |
| PPP1R14A       |
| LOC100129826   |
| C2orf73        |
| RBFOX3         |
| C22orf45       |
| XLOC_003863    |
| C2orf49        |
| TFDP2          |
| XK             |
| CEACAM6        |
| ITLN1          |
| SFTA2          |
| KNDC1          |
| NR4A2          |
| XLOC_011181    |
| LOC100505495   |
| LYRM2          |
| XLOC_009021    |
| XLOC_I2_011854 |
| CYP2F1         |
| RGS16          |
| LOC100506853   |
| XLOC_004127    |
| SIGLEC8        |
| LOC100499227   |
| XLOC_I2_008609 |
| VKORC1         |
| OR5AP2         |
| ELANE          |
| CLC            |
| SLC18A3        |
| YOD1           |
| PLK3           |
| XLOC_005681    |
| DUX4           |
| XLOC_013686    |
| LOC404266      |
| XLOC_013546    |
| XLOC_012841    |
| XLOC_013581    |
| P2RX3          |
| CSF1           |
| ATOH8          |

|                |
|----------------|
| UGT2B15        |
| XLOC_000329    |
| XLOC_005505    |
| SEC14L1        |
| DUSP2          |
| LOC92659       |
| C9orf50        |
| XLOC_I2_000297 |
| LOC728054      |
| XLOC_002254    |
| LOC619207      |
| LOC100506775   |
| LOC728377      |
| FOXB1          |
| XLOC_008558    |
| LOC100132330   |
| OR2W3          |
| LOC100131831   |
| RCAN2          |
| LRRC10         |
| FGF1           |
| SEZ6           |
| C9orf173       |
| XLOC_007354    |
| SLC6A18        |
| LOC100506767   |
| C9orf25        |
| ADARB2-AS1     |
| XLOC_007530    |
| XLOC_I2_006640 |
| RTN4RL1        |
| PBX1           |
| XLOC_013602    |
| EMR1           |
| ARHGEF16       |
| XLOC_004535    |
| Q20ZE8         |
| CARD14         |
| OTOA           |
| RNF182         |
| XLOC_I2_013242 |
| ARGFX          |
| VWA2           |
| FAM66A         |
| PITX1          |
| XLOC_012335    |
| LOC286058      |

|                |
|----------------|
| XLOC_011645    |
| BCORP1         |
| XLOC_002049    |
| KRT76          |
| WBP1           |
| LOC100288594   |
| FHL2           |
| MLL4           |
| CNTNAP3B       |
| CD177          |
| CCDC134        |
| LOC100132249   |
| XLOC_005176    |
| BTNL3          |
| LOC727721      |
| XLOC_006151    |
| XLOC_I2_002767 |
| XLOC_I2_007767 |
| LPPR4          |
| SEZ6L2         |
| UNQ6975        |
| XLOC_013562    |
| XLOC_005083    |
| TLR5           |
| CLPS           |
| CCL4           |
| OLIG1          |
| FAM186B        |
| XLOC_001608    |
| IL15RA         |
| TRIB1          |
| TDRD9          |
| DUX4L9         |
| RAB44          |
| ITGB2          |
| XLOC_I2_012071 |
| XLOC_000550    |
| LOC100506262   |
| LOC388210      |
| PCDHB13        |
| MGC39584       |
| KRT31          |
| XLOC_004700    |
| LINC00494      |
| SEMA4B         |
| DPRX           |
| XLOC_001441    |



|                |
|----------------|
| XLOC_000974    |
| GTSCR1         |
| EGR3           |
| PRB3           |
| XLOC_013785    |
| SEPT7P2        |
| LOC255167      |
| ZSCAN1         |
| DOT1L          |
| LOC100506613   |
| XLOC_001974    |
| LOC148696      |
| XLOC_002909    |
| REEP1          |
| PTGDR2         |
| RGS1           |
| XLOC_011515    |
| SNORA29        |
| PPAN           |
| XLOC_014107    |
| DEFA3          |
| XLOC_001516    |
| XLOC_009000    |
| XLOC_004710    |
| CGREF1         |
| LOC100653060   |
| XLOC_I2_004381 |
| LOC100506380   |
| NKAIN1         |
| KRTAP10-12     |
| LALBA          |
| XLOC_007326    |
| COL11A2        |
| RINT1          |
| TLE1           |
| XLOC_I2_010014 |
| PALM           |
| CD24           |
| NFASC          |
| LOC729424      |
| RNF167         |
| AMFR           |
| SLC5A6         |
| ISLR           |
| OLFM4          |
| FLI25694       |
| PEA15          |

|                |
|----------------|
| MESTIT1        |
| OR3A3          |
| CLDN3          |
| FLI39632       |
| LOC100505697   |
| MUC6           |
| LOC400662      |
| LOC200830      |
| SRRM3          |
| PRIMA1         |
| FXYD5          |
| NOTO           |
| TRAK2          |
| XLOC_008144    |
| XLOC_000822    |
| XLOC_007511    |
| SPOCK2         |
| MTVR2          |
| XLOC_000377    |
| XLOC_007438    |
| ZNF501         |
| PFDN6          |
| XLOC_003714    |
| THBS1          |
| OR7E24         |
| SMPD3          |
| DCAF4L2        |
| PMAIP1         |
| XLOC_I2_000465 |
| XLOC_010936    |
| HSP90B1        |
| CXCL1          |
| XLOC_009038    |
| XLOC_004346    |
| XLOC_011519    |
| GPR146         |
| KLRAP1         |
| LOC100233156   |
| TRIM71         |
| CPLX2          |
| ARSD           |
| SLC29A1        |
| LIN9           |
| TFAP2A         |
| XLOC_I2_006718 |
| XLOC_000630    |
| LOC100134229   |

|                |
|----------------|
| MYZAP          |
| XLOC_013814    |
| RGS12          |
| MAP1LC3A       |
| SNORA28        |
| SPAG8          |
| MEG3           |
| GPR25          |
| LOC100499221   |
| Q8VGA8         |
| LSR            |
| ACTR3BP5       |
| LOC100134240   |
| ZNF488         |
| XLOC_006486    |
| XLOC_002275    |
| LOC284757      |
| LOC100134259   |
| LOC100129869   |
| XLOC_011978    |
| PER1           |
| XLOC_001847    |
| NFXL1          |
| LOC100289090   |
| XLOC_014003    |
| SNORA39        |
| LOC648987      |
| ALAS2          |
| XLOC_I2_004817 |
| RGPD1          |
| XLOC_I2_011873 |
| XLOC_008504    |
| S100A12        |
| FOXO3          |
| CD69           |
| FLJ42875       |
| RNF222         |
| FAM127B        |
| B4GALT5        |
| SPTBN4         |
| OR51I2         |
| XLOC_001938    |
| XLOC_004577    |
| XLOC_I2_014931 |
| XLOC_I2_012374 |
| C6orf147       |
| ZFP57          |

MedVsHigh\_Data1-2

|    |                |
|----|----------------|
|    | XLOC_I2_005415 |
|    | CEBPE          |
|    | OLIG2          |
|    | SLC22A10       |
|    | SH2D5          |
|    | ZBTB32         |
|    | AAK1           |
|    | GSTT1          |
|    | ACCSL          |
|    | PDE4A          |
|    | CYP1B1         |
|    | LOC441601      |
|    | XLOC_011880    |
|    | C12orf69       |
|    | SOAT2          |
|    | MYB            |
|    | NAT14          |
| 55 | SLC5A11        |
|    | XLOC_011081    |
|    | NCRNA00185     |
|    | LOC100506159   |
|    | XLOC_I2_011118 |
|    | SLC6A10P       |
|    | LEPREL2        |
|    | DNAJA4         |
|    | QDPR           |
|    | CLEC2B         |
|    | HBZ            |
|    | DCAF12         |
|    | LOC100132207   |
|    | XLOC_008745    |
|    | XLOC_009123    |
|    | TNFAIP6        |
|    | ATP6AP1L       |
|    | XLOC_005119    |
|    | SYCE3          |
|    | EPB49          |
|    | LOC100506035   |
|    | XLOC_009389    |
|    | IGFBP2         |
|    | XLOC_003810    |
|    | KLRC4          |
|    | HLA-DQA1       |
|    | TRIM58         |
|    | UCP2           |
|    | MCF2L          |
|    | LOC100506854   |

LoeVsHigh\_Data1-1

223

|              |
|--------------|
| EIF2AK2      |
| XLOC_011718  |
| SESN3        |
| LOC100128262 |
| DDIT4        |
| PGF          |
| LCN10        |
| OAS2         |
| SLC6A8       |
| XLOC_012099  |
| HBM          |
| GLRX5        |
| E2F2         |
| HERC5        |
| KANK2        |
| LOC100131510 |
| RFPL4A       |
| SLC6A9       |
| ESPN         |
| XLOC_010686  |
| TTY10        |
| SNORD3B-1    |
| BRWD1        |
| IFIT3        |
| MLLT4        |
| COBLL1       |
| KRTCAP2      |
| ZNF799       |
| BTN2A1       |
| ZFP28        |
| POLI         |
| CERK         |
| DOP1B        |
| TAS2R10      |
| DIP2A        |
| HERC2        |
| ZNF510       |
| ZNF506       |
| LPAR4        |
| SMIM3        |
| PAPSS2       |
| ZFP14        |
| CARD11       |
| TRAF5        |
| PLCG1        |
| ZNF43        |
| ATP6V0B      |

|           |
|-----------|
| ZNF141    |
| AQP10     |
| LGALS1    |
| SLC15A4   |
| CABP5     |
| SERPING1  |
| ZNF75A    |
| TMEM156   |
| ALCAM     |
| MRPS17    |
| NIPSNAP3B |
| ZNF836    |
| SNORA44   |
| CCDC122   |
| EBPL      |
| EFCAB7    |
| UPF3A     |
| SNX25     |
| BACE2     |
| NDUFAF6   |
| RPL32     |
| NUP88     |
| VPS36     |
| MOB4      |
| PAN2      |
| CBR4      |
| IFT80     |
| KCNQ5     |
| DTX1      |
| PEX1      |
| CCR3      |
| ANKLE2    |
| ZNF138    |
| GORAB     |
| TUBA1B    |
| HEATR5B   |
| SMC6      |
| DGKD      |
| FAM169A   |
| GAA       |
| DEF8      |
| TTC13     |
| TAS2R19   |
| CTSS      |
| NEMP2     |
| C12orf65  |
| AKTIP     |

|              |
|--------------|
| DLST         |
| NCAPD3       |
| ZNF649       |
| ZBTB16       |
| HIGD1A       |
| PDPR         |
| RAB6B        |
| RAD54B       |
| MBD4         |
| ZFP30        |
| ZNF234       |
| SNORA14A     |
| ITPR1        |
| PSENN        |
| LIPA         |
| NT5E         |
| ACVR1C       |
| CRIM1        |
| LOC100128398 |
| TIMM29       |
| FLNB         |
| PSIP1        |
| GCNT2        |
| ARHGEF18     |
| PPDPF        |
| LRIG1        |
| TMC6         |
| OSGEPL1      |
| CENPC        |
| NHEJ1        |
| LIMS1        |
| SLC31A2      |
| ZNF780B      |
| CCDC14       |
| EEF2K        |
| SNHG32       |
| MT1X         |
| TIMP1        |
| KAT2A        |
| SPIC         |
| MFSD1        |
| RAB31        |
| PIGT         |
| KLHDC2       |
| FAM149B1     |
| HLA-F-AS1    |
| ABI3         |

|          |
|----------|
| TAS2R14  |
| XCL2     |
| ZNF33B   |
| SLC4A10  |
| LY6G5C   |
| GRAMD1C  |
| DDX55    |
| XCL1     |
| ATP6V1F  |
| ZNF767P  |
| ADARB1   |
| CD163    |
| LMO7     |
| HNRNPH1  |
| PPP1R2   |
| ACSS1    |
| RBM4B    |
| METTL18  |
| GUSBP5   |
| CNR2     |
| PIK3C2B  |
| CHMP2A   |
| RTN4IP1  |
| PTGDS    |
| CPSF1    |
| S100A4   |
| YBEY     |
| BTN2A2   |
| ZNF808   |
| SESN1    |
| ZNF844   |
| ZNF286A  |
| ZNF302   |
| UFSP2    |
| JUNB     |
| TP53INP1 |
| TBC1D10C |
| ZNF841   |
| TTC39B   |
| IFI30    |
| EMP3     |
| ZNF426   |
| ZNF121   |
| ADCY10P1 |
| MIR600HG |
| C1QB     |
| AP3S1    |



|           |
|-----------|
| ZNF160    |
| PMS2P5    |
| DZIP3     |
| CCDC144NL |
| CRYGS     |
| NR2C1     |
| TNFRSF13B |
| IL4R      |
| MT1F      |
| JUP       |
| INTS4     |
| GTPBP6    |
| LY6E      |
| PATJ      |
| ATP10D    |
| HAPLN3    |
| SUDS3     |
| RPL8      |
| ELP1      |
| AIM2      |
| NUP205    |
| MT1H      |
| DIS3L     |
| RPL31     |
| CLUAP1    |
| SFMBT1    |
| KLF13     |
| C11orf65  |
| HIP1      |
| RRP15     |
| GGTA1P    |
| C18orf54  |
| ABCA5     |
| ZBTB25    |
| HIGD2A    |
| CXCL16    |
| MT2A      |
| CISH      |
| ZNF33A    |
| PHTF2     |
| TAS2R20   |
| LY96      |
| ERCC6L2   |
| ATG14     |
| PRMT7     |
| ZNF678    |
| ENPP3     |

|          |
|----------|
| SLC38A11 |
| SNORD29  |
| LMBR1    |
| ZNF251   |
| BTAF1    |
| ZNF440   |
| SMAD5    |
| ZBED5    |
| ZNF224   |
| MYADM    |
| DNAJC10  |
| SPEF2    |
| WDSUB1   |
