# Supplementary material for: Association between Arsenic Level, Gene Expression in Asian Population, and In Vitro Carcinogenic Bladder Tumor
Source: Hindawi journal article supplement (doi:10.1155/2022/3459855), 2022-01-01
Supplement: f11 [file 3459855.f11.pdf]

Table S10. List of 147 unique genes.

|             | GB_ACC   | Symbol | Species.Scientific.Name | Annotation.Date | Sequence.Type      | Sequence.Source | Target.Description                                                                                                                                                                                                  | Representative.Public.ID | Gene.Title                                    | Gene.Symbol | ENTREZ_GENE_ID | RefSeq.Transcript.ID                                                                                                             | Gene.Ontology.Biological.Process                                                                                                                                                                                                                                                                                                                                                                                                           | Gene.Ontology.Cellular.Component                                                                                                                                                                  | Gene.Ontology.Molecular.Function                                                                                                                                                                                                                                                                                                                                                                                                                                                                                                                                                                                                          |
|-------------|----------|--------|-------------------------|-----------------|--------------------|-----------------|---------------------------------------------------------------------------------------------------------------------------------------------------------------------------------------------------------------------|--------------------------|-----------------------------------------------|-------------|----------------|----------------------------------------------------------------------------------------------------------------------------------|--------------------------------------------------------------------------------------------------------------------------------------------------------------------------------------------------------------------------------------------------------------------------------------------------------------------------------------------------------------------------------------------------------------------------------------------|---------------------------------------------------------------------------------------------------------------------------------------------------------------------------------------------------|-------------------------------------------------------------------------------------------------------------------------------------------------------------------------------------------------------------------------------------------------------------------------------------------------------------------------------------------------------------------------------------------------------------------------------------------------------------------------------------------------------------------------------------------------------------------------------------------------------------------------------------------|
| 200938_s_at | AI920976 | RERE   | Homo sapiens            | 6-Oct-14        | Consensus sequence | GenBank         | Consensus includes gb:AI920976 /FEA=EST /DB_XREF=gi:5656940 /DB_XREF=est:wo16h05.x1 /CLONE=IMAGE:2455545 /UG=Hs.194369 arginine-glutamic acid dipeptide (RE) repeats /FL=gb:AF118275.1 gb:NM_012102.1 gb:AB036737.1 | AI920976                 | arginine-glutamic acid dipeptide (RE) repeats | RERE        | 473            | NM_001042681 /// NM_001042682 /// NM_012102 /// XM_005263464 /// XM_005263465 /// XM_005263466 /// XM_006710653 /// XM_006710654 | 0006338 // chromatin remodeling // inferred from electronic annotation /// 0006351 // transcription, DNA-templated // inferred from electronic annotation /// 0006355 // regulation of transcription, DNA-templated // inferred from electronic annotation /// 0006607 // NLS-bearing protein import into nucleus // traceable author statement /// 0007275 // multicellular organismal development // inferred from electronic annotation | 0000118 // histone deacetylase complex // inferred from electronic annotation /// 0005634 // nucleus // non-traceable author statement /// 0005739 // mitochondrion // inferred from direct assay | 0003677 // DNA binding // inferred from electronic annotation /// 0003682 // chromatin binding // inferred from electronic annotation /// 0003700 // sequence-specific DNA binding transcription factor activity // inferred from electronic annotation /// 0005515 // protein binding // inferred from physical interaction /// 0008267 // poly-glutamine tract binding // traceable author statement /// 0008270 // zinc ion binding // inferred from electronic annotation /// 0043565 // sequence-specific DNA binding // inferred from electronic annotation /// 0046872 // metal ion binding // inferred from electronic annotation |

|             |           |      |              |          |                   |         |                                                                                                                                                                                                                                                                                                     |           |                                               |      |     |                                                                                                                                  |                                                                                                                                                                                                                                                                                                                                                                                                                                            |                                                                                                                                                                                                   |                                                                                                                                                                                                                                                                                                                                                                                                                                                                                                                                                                                                                                           |
|-------------|-----------|------|--------------|----------|-------------------|---------|-----------------------------------------------------------------------------------------------------------------------------------------------------------------------------------------------------------------------------------------------------------------------------------------------------|-----------|-----------------------------------------------|------|-----|----------------------------------------------------------------------------------------------------------------------------------|--------------------------------------------------------------------------------------------------------------------------------------------------------------------------------------------------------------------------------------------------------------------------------------------------------------------------------------------------------------------------------------------------------------------------------------------|---------------------------------------------------------------------------------------------------------------------------------------------------------------------------------------------------|-------------------------------------------------------------------------------------------------------------------------------------------------------------------------------------------------------------------------------------------------------------------------------------------------------------------------------------------------------------------------------------------------------------------------------------------------------------------------------------------------------------------------------------------------------------------------------------------------------------------------------------------|
| 200939_s_at | NM_012102 | RERE | Homo sapiens | 6-Oct-14 | Exemplar sequence | GenBank | gb:NM_012102.1 /DEF=Homo sapiens arginine-glutamic acid dipeptide (RE) repeats (RERE), mRNA. /FEA=mRNA /GEN=RERE /PROD=arginine-glutamic acid dipeptide (RE) repeats /DB_XREF=gi:6912253 /UG=Hs.194369 arginine-glutamic acid dipeptide (RE) repeats /FL=gb:AF118275.1 gb:NM_012102.1 gb:AB036737.1 | NM_012102 | arginine-glutamic acid dipeptide (RE) repeats | RERE | 473 | NM_001042681 /// NM_001042682 /// NM_012102 /// XM_005263464 /// XM_005263465 /// XM_005263466 /// XM_006710653 /// XM_006710654 | 0006338 // chromatin remodeling // inferred from electronic annotation /// 0006351 // transcription, DNA-templated // inferred from electronic annotation /// 0006355 // regulation of transcription, DNA-templated // inferred from electronic annotation /// 0006607 // NLS-bearing protein import into nucleus // traceable author statement /// 0007275 // multicellular organismal development // inferred from electronic annotation | 0000118 // histone deacetylase complex // inferred from electronic annotation /// 0005634 // nucleus // non-traceable author statement /// 0005739 // mitochondrion // inferred from direct assay | 0003677 // DNA binding // inferred from electronic annotation /// 0003682 // chromatin binding // inferred from electronic annotation /// 0003700 // sequence-specific DNA binding transcription factor activity // inferred from electronic annotation /// 0005515 // protein binding // inferred from physical interaction /// 0008267 // poly-glutamine tract binding // traceable author statement /// 0008270 // zinc ion binding // inferred from electronic annotation /// 0043565 // sequence-specific DNA binding // inferred from electronic annotation /// 0046872 // metal ion binding // inferred from electronic annotation |
|-------------|-----------|------|--------------|----------|-------------------|---------|-----------------------------------------------------------------------------------------------------------------------------------------------------------------------------------------------------------------------------------------------------------------------------------------------------|-----------|-----------------------------------------------|------|-----|----------------------------------------------------------------------------------------------------------------------------------|--------------------------------------------------------------------------------------------------------------------------------------------------------------------------------------------------------------------------------------------------------------------------------------------------------------------------------------------------------------------------------------------------------------------------------------------|---------------------------------------------------------------------------------------------------------------------------------------------------------------------------------------------------|-------------------------------------------------------------------------------------------------------------------------------------------------------------------------------------------------------------------------------------------------------------------------------------------------------------------------------------------------------------------------------------------------------------------------------------------------------------------------------------------------------------------------------------------------------------------------------------------------------------------------------------------|

|             |          |      |              |          |                   |         |                                                                                                                                                                                                                  |          |                                               |      |     |                                                                                                                                  |                                                                                                                                                                                                                                                                                                                                                                                                                                            |                                                                                                                                                                                                   |                                                                                                                                                                                                                                                                                                                                                                                                                                                                                                                                                                                                                                           |
|-------------|----------|------|--------------|----------|-------------------|---------|------------------------------------------------------------------------------------------------------------------------------------------------------------------------------------------------------------------|----------|-----------------------------------------------|------|-----|----------------------------------------------------------------------------------------------------------------------------------|--------------------------------------------------------------------------------------------------------------------------------------------------------------------------------------------------------------------------------------------------------------------------------------------------------------------------------------------------------------------------------------------------------------------------------------------|---------------------------------------------------------------------------------------------------------------------------------------------------------------------------------------------------|-------------------------------------------------------------------------------------------------------------------------------------------------------------------------------------------------------------------------------------------------------------------------------------------------------------------------------------------------------------------------------------------------------------------------------------------------------------------------------------------------------------------------------------------------------------------------------------------------------------------------------------------|
| 200940_s_at | AB036737 | RERE | Homo sapiens | 6-Oct-14 | Exemplar sequence | GenBank | gb:AB036737.1 /DEF=Homo sapiens mRNA for RERE, complete cds. /FEA=mRNA /PROD=RERE /DB_XREF=gi:8096339 /UG=Hs.194369 arginine-glutamic acid dipeptide (RE) repeats /FL=gb:AF118275.1 gb:NM_012102.1 gb:AB036737.1 | AB036737 | arginine-glutamic acid dipeptide (RE) repeats | RERE | 473 | NM_001042681 /// NM_001042682 /// NM_012102 /// XM_005263464 /// XM_005263465 /// XM_005263466 /// XM_006710653 /// XM_006710654 | 0006338 // chromatin remodeling // inferred from electronic annotation /// 0006351 // transcription, DNA-templated // inferred from electronic annotation /// 0006355 // regulation of transcription, DNA-templated // inferred from electronic annotation /// 0006607 // NLS-bearing protein import into nucleus // traceable author statement /// 0007275 // multicellular organismal development // inferred from electronic annotation | 0000118 // histone deacetylase complex // inferred from electronic annotation /// 0005634 // nucleus // non-traceable author statement /// 0005739 // mitochondrion // inferred from direct assay | 0003677 // DNA binding // inferred from electronic annotation /// 0003682 // chromatin binding // inferred from electronic annotation /// 0003700 // sequence-specific DNA binding transcription factor activity // inferred from electronic annotation /// 0005515 // protein binding // inferred from physical interaction /// 0008267 // poly-glutamine tract binding // traceable author statement /// 0008270 // zinc ion binding // inferred from electronic annotation /// 0043565 // sequence-specific DNA binding // inferred from electronic annotation /// 0046872 // metal ion binding // inferred from electronic annotation |
|-------------|----------|------|--------------|----------|-------------------|---------|------------------------------------------------------------------------------------------------------------------------------------------------------------------------------------------------------------------|----------|-----------------------------------------------|------|-----|----------------------------------------------------------------------------------------------------------------------------------|--------------------------------------------------------------------------------------------------------------------------------------------------------------------------------------------------------------------------------------------------------------------------------------------------------------------------------------------------------------------------------------------------------------------------------------------|---------------------------------------------------------------------------------------------------------------------------------------------------------------------------------------------------|-------------------------------------------------------------------------------------------------------------------------------------------------------------------------------------------------------------------------------------------------------------------------------------------------------------------------------------------------------------------------------------------------------------------------------------------------------------------------------------------------------------------------------------------------------------------------------------------------------------------------------------------|

|           |          |       |              |          |                    |         |                                                                                                                                                                                        |          |                       |       |      |                                                   |                                                                                                                                                                                                                                                                                                                                                                                                                                                                                                                                                                                                                                                                                 |                                                                                                                                                                                                                                                                                                                                                                                                                                                              |                                                                                                                                                                                                                                |
|-----------|----------|-------|--------------|----------|--------------------|---------|----------------------------------------------------------------------------------------------------------------------------------------------------------------------------------------|----------|-----------------------|-------|------|---------------------------------------------------|---------------------------------------------------------------------------------------------------------------------------------------------------------------------------------------------------------------------------------------------------------------------------------------------------------------------------------------------------------------------------------------------------------------------------------------------------------------------------------------------------------------------------------------------------------------------------------------------------------------------------------------------------------------------------------|--------------------------------------------------------------------------------------------------------------------------------------------------------------------------------------------------------------------------------------------------------------------------------------------------------------------------------------------------------------------------------------------------------------------------------------------------------------|--------------------------------------------------------------------------------------------------------------------------------------------------------------------------------------------------------------------------------|
| 200962_at | AI348010 | RPL31 | Homo sapiens | 6-Oct-14 | Consensus sequence | GenBank | Consensus includes<br>gb:AI348010<br>/FEA=EST<br>/DB_XREF=gi:4085216<br>/DB_XREF=est:qp61b10.x1<br>/CLONE=IMAGE:1927483<br>/UG=Hs.184014<br>ribosomal protein L31<br>/FL=gb:NM_00993.1 | AI348010 | ribosomal protein L31 | RPL31 | 6160 | NM_000993 ///<br>NM_001098577 ///<br>NM_001099693 | 0000184 // nuclear-transcribed mRNA<br>catabolic process,<br>nonsense-mediated decay<br>// traceable author<br>statement /// 0006412 //<br>translation // non-traceable author<br>statement /// 0006412 //<br>translation // traceable<br>author statement ///<br>0006413 // translational<br>initiation // traceable<br>author statement ///<br>0006414 // translational<br>elongation // traceable<br>author statement ///<br>0006415 // translational<br>termination // traceable<br>author statement ///<br>0006614 // SRP-dependent cotranslational<br>protein targeting to<br>membrane // traceable<br>author statement ///<br>0010467 // gene<br>expression // traceable | 0005622 // intracellular //<br>inferred from<br>electronic<br>annotation ///<br>0005829 // cytosol<br>// traceable author<br>statement ///<br>0005840 // ribosome //<br>inferred from<br>electronic<br>annotation ///<br>0016020 // membrane //<br>inferred from<br>direct assay ///<br>0022625 // cytosolic large<br>ribosomal subunit<br>// inferred from<br>direct assay ///<br>0030529 // ribonucleoprotein<br>complex //<br>inferred from<br>electronic | 0003723 // RNA binding //<br>traceable author statement<br>/// 0003735 // structural<br>constituent of ribosome //<br>non-traceable author<br>statement /// 0044822 //<br>poly(A) RNA binding //<br>inferred from direct assay |
|-----------|----------|-------|--------------|----------|--------------------|---------|----------------------------------------------------------------------------------------------------------------------------------------------------------------------------------------|----------|-----------------------|-------|------|---------------------------------------------------|---------------------------------------------------------------------------------------------------------------------------------------------------------------------------------------------------------------------------------------------------------------------------------------------------------------------------------------------------------------------------------------------------------------------------------------------------------------------------------------------------------------------------------------------------------------------------------------------------------------------------------------------------------------------------------|--------------------------------------------------------------------------------------------------------------------------------------------------------------------------------------------------------------------------------------------------------------------------------------------------------------------------------------------------------------------------------------------------------------------------------------------------------------|--------------------------------------------------------------------------------------------------------------------------------------------------------------------------------------------------------------------------------|

|             |           |       |              |          |                   |         |                                                                                                                                                                                                   |           |                       |       |      |                                             |                                                                                                                                                                                                                                                                                                                                                                                                                                                                                                                                                                                                            |                                                                                                                                                                                                                                                                                                                                                                                               |                                                                                                                                                                                                           |
|-------------|-----------|-------|--------------|----------|-------------------|---------|---------------------------------------------------------------------------------------------------------------------------------------------------------------------------------------------------|-----------|-----------------------|-------|------|---------------------------------------------|------------------------------------------------------------------------------------------------------------------------------------------------------------------------------------------------------------------------------------------------------------------------------------------------------------------------------------------------------------------------------------------------------------------------------------------------------------------------------------------------------------------------------------------------------------------------------------------------------------|-----------------------------------------------------------------------------------------------------------------------------------------------------------------------------------------------------------------------------------------------------------------------------------------------------------------------------------------------------------------------------------------------|-----------------------------------------------------------------------------------------------------------------------------------------------------------------------------------------------------------|
| 200963_x_at | NM_000993 | RPL31 | Homo sapiens | 6-Oct-14 | Exemplar sequence | GenBank | gb:NM_000993.1 /DEF=Homo sapiens ribosomal protein L31 (RPL31), mRNA. /FEA=mRNA /GEN=RPL31 /PROD=ribosomal protein L31 /DB_XREF=gi:4506632 /UG=Hs.184014 ribosomal protein L31 /FL=gb:NM_000993.1 | NM_000993 | ribosomal protein L31 | RPL31 | 6160 | NM_000993 /// NM_001098577 /// NM_001099693 | 0000184 // nuclear-transcribed mRNA catabolic process, nonsense-mediated decay // traceable author statement /// 0006412 // translation // non-traceable author statement /// 0006412 // translation // traceable author statement /// 0006413 // translational initiation // traceable author statement /// 0006414 // translational elongation // traceable author statement /// 0006415 // translational termination // traceable author statement /// 0006614 // SRP-dependent cotranslational protein targeting to membrane // traceable author statement /// 0010467 // gene expression // traceable | 0005622 // intracellular // inferred from electronic annotation /// 0005829 // cytosol // traceable author statement /// 0005840 // ribosome // inferred from electronic annotation /// 0016020 // membrane // inferred from direct assay /// 0022625 // cytosolic large ribosomal subunit // inferred from direct assay /// 0030529 // ribonucleoprotein complex // inferred from electronic | 0003723 // RNA binding // traceable author statement /// 0003735 // structural constituent of ribosome // non-traceable author statement /// 0044822 // poly(A) RNA binding // inferred from direct assay |
|-------------|-----------|-------|--------------|----------|-------------------|---------|---------------------------------------------------------------------------------------------------------------------------------------------------------------------------------------------------|-----------|-----------------------|-------|------|---------------------------------------------|------------------------------------------------------------------------------------------------------------------------------------------------------------------------------------------------------------------------------------------------------------------------------------------------------------------------------------------------------------------------------------------------------------------------------------------------------------------------------------------------------------------------------------------------------------------------------------------------------------|-----------------------------------------------------------------------------------------------------------------------------------------------------------------------------------------------------------------------------------------------------------------------------------------------------------------------------------------------------------------------------------------------|-----------------------------------------------------------------------------------------------------------------------------------------------------------------------------------------------------------|

|             |           |     |              |          |                   |         |                                                                                                                                                                                                                                          |           |                      |     |      |                                                                                                                                                                                                                |                                                                                                                                                                                                                                                                                                                                                                                                                                                                                                                                                                                                                       |                                                                                                                                                                                                                                                                                                                                                                                            |                                                                                                                                                                                                                                                                                                                                                                                                                                                                                                                                                                                                                                                                                                                                              |
|-------------|-----------|-----|--------------|----------|-------------------|---------|------------------------------------------------------------------------------------------------------------------------------------------------------------------------------------------------------------------------------------------|-----------|----------------------|-----|------|----------------------------------------------------------------------------------------------------------------------------------------------------------------------------------------------------------------|-----------------------------------------------------------------------------------------------------------------------------------------------------------------------------------------------------------------------------------------------------------------------------------------------------------------------------------------------------------------------------------------------------------------------------------------------------------------------------------------------------------------------------------------------------------------------------------------------------------------------|--------------------------------------------------------------------------------------------------------------------------------------------------------------------------------------------------------------------------------------------------------------------------------------------------------------------------------------------------------------------------------------------|----------------------------------------------------------------------------------------------------------------------------------------------------------------------------------------------------------------------------------------------------------------------------------------------------------------------------------------------------------------------------------------------------------------------------------------------------------------------------------------------------------------------------------------------------------------------------------------------------------------------------------------------------------------------------------------------------------------------------------------------|
| 201015_s_at | NM_021991 | JUP | Homo sapiens | 6-Oct-14 | Exemplar sequence | GenBank | gb:NM_021991.1 /DEF=Homo sapiens junction plakoglobin (JUP), transcript variant 2, mRNA. /FEA=mRNA /GEN=JUP /PROD=junction plakoglobin, isoform 1 /DB_XREF=gi:12056467 /UG=Hs.2340 junction plakoglobin /FL=gb:NM_021991.1 gb:BC000441.1 | NM_021991 | junction plakoglobin | JUP | 3728 | NM_002230 ///<br>NM_021991 ///<br>XM_005257313 ///<br>XM_006721871 ///<br>XM_006721872 ///<br>XM_006721873 ///<br>XM_006721874 ///<br>XM_006721875 ///<br>XM_006721876 ///<br>XM_006721877 ///<br>XM_006721878 | 0000122 // negative regulation of transcription from RNA polymerase II promoter // not recorded /// 0000902 // cell morphogenesis // not recorded /// 0002159 // desmosome assembly // inferred from direct assay /// 0002159 // desmosome assembly // inferred from mutant phenotype /// 0003136 // negative regulation of heart induction by canonical Wnt signaling pathway // not recorded /// 0003181 // atrioventricular valve morphogenesis // not recorded /// 0003308 // negative regulation of Wnt signaling pathway involved in heart development // not recorded /// 0007016 // cytoskeletal anchoring at | 0005634 // nucleus // inferred from mutant phenotype /// 0005667 // transcription factor complex // not recorded /// 0005737 // cytoplasm // inferred from mutant phenotype /// 0005829 // cytosol // inferred from sequence or structural similarity /// 0005856 // cytoskeleton // inferred from sequence or structural similarity /// 0005882 // intermediate filament // inferred from | 0003713 // transcription coactivator activity // inferred from direct assay /// 0005198 // structural molecule activity // not recorded /// 0005198 // structural molecule activity // non-traceable author statement /// 0005199 // structural constituent of cell wall // inferred by curator /// 0005488 // binding // inferred from electronic annotation /// 0005515 // protein binding // inferred from physical interaction /// 0019901 // protein kinase binding // not recorded /// 0019903 // protein phosphatase binding // inferred from physical interaction /// 0042803 // protein homodimerization activity // inferred from sequence or structural similarity /// 0045294 // alpha-catenin binding // inferred from physical |
|-------------|-----------|-----|--------------|----------|-------------------|---------|------------------------------------------------------------------------------------------------------------------------------------------------------------------------------------------------------------------------------------------|-----------|----------------------|-----|------|----------------------------------------------------------------------------------------------------------------------------------------------------------------------------------------------------------------|-----------------------------------------------------------------------------------------------------------------------------------------------------------------------------------------------------------------------------------------------------------------------------------------------------------------------------------------------------------------------------------------------------------------------------------------------------------------------------------------------------------------------------------------------------------------------------------------------------------------------|--------------------------------------------------------------------------------------------------------------------------------------------------------------------------------------------------------------------------------------------------------------------------------------------------------------------------------------------------------------------------------------------|----------------------------------------------------------------------------------------------------------------------------------------------------------------------------------------------------------------------------------------------------------------------------------------------------------------------------------------------------------------------------------------------------------------------------------------------------------------------------------------------------------------------------------------------------------------------------------------------------------------------------------------------------------------------------------------------------------------------------------------------|

|             |           |       |              |          |                   |         |                                                                                                                                                                                                                              |           |                                |       |      |           |                                                                                                                                                                                                                                                                                                                                                                                                                                                                                                                                                                                                                                                              |                                                                                                                                       |                                                                                                                                                                                                                                                                                                                                                                                                                                                                                                                                                                                                                                                                                                                     |
|-------------|-----------|-------|--------------|----------|-------------------|---------|------------------------------------------------------------------------------------------------------------------------------------------------------------------------------------------------------------------------------|-----------|--------------------------------|-------|------|-----------|--------------------------------------------------------------------------------------------------------------------------------------------------------------------------------------------------------------------------------------------------------------------------------------------------------------------------------------------------------------------------------------------------------------------------------------------------------------------------------------------------------------------------------------------------------------------------------------------------------------------------------------------------------------|---------------------------------------------------------------------------------------------------------------------------------------|---------------------------------------------------------------------------------------------------------------------------------------------------------------------------------------------------------------------------------------------------------------------------------------------------------------------------------------------------------------------------------------------------------------------------------------------------------------------------------------------------------------------------------------------------------------------------------------------------------------------------------------------------------------------------------------------------------------------|
| 201041_s_at | NM_004417 | DUSP1 | Homo sapiens | 6-Oct-14 | Exemplar sequence | GenBank | gb:NM_004417.2 /DEF=Homo sapiens dual specificity phosphatase 1 (DUSP1), mRNA. /FEA=mRNA /GEN=DUSP1 /PROD=dual specificity phosphatase 1 /DB_XREF=gi:7108342 /UG=Hs.171695 dual specificity phosphatase 1 /FL=gb:NM_004417.2 | NM_004417 | dual specificity phosphatase 1 | DUSP1 | 1843 | NM_004417 | 0000188 // inactivation of MAPK activity // inferred from sequence or structural similarity /// 0001706 // endoderm formation // not recorded /// 0006470 // protein dephosphorylation // not recorded /// 0006950 // response to stress // inferred from electronic annotation /// 0006979 // response to oxidative stress // traceable author statement /// 0007049 // cell cycle // inferred from electronic annotation /// 0009416 // response to light stimulus // inferred from electronic annotation /// 0010033 // response to organic substance // inferred from electronic annotation /// 0016311 // dephosphorylation // inferred from electronic | 0005634 // nucleus // inferred from direct assay /// 0005654 // nucleoplasm // /// 0005737 // cytoplasm // inferred from direct assay | 0004721 // phosphoprotein phosphatase activity // inferred from electronic annotation /// 0004725 // protein tyrosine phosphatase activity // inferred from electronic annotation /// 0004726 // non-membrane spanning protein tyrosine phosphatase activity // traceable author statement /// 0005515 // protein binding // inferred from physical interaction /// 0008138 // protein tyrosine/serine/threonine phosphatase activity // not recorded /// 0008330 // protein tyrosine/threonine phosphatase activity // inferred from electronic annotation /// 0016787 // hydrolase activity // inferred from electronic annotation /// 0016791 // phosphatase activity // inferred from electronic annotation /// |
|-------------|-----------|-------|--------------|----------|-------------------|---------|------------------------------------------------------------------------------------------------------------------------------------------------------------------------------------------------------------------------------|-----------|--------------------------------|-------|------|-----------|--------------------------------------------------------------------------------------------------------------------------------------------------------------------------------------------------------------------------------------------------------------------------------------------------------------------------------------------------------------------------------------------------------------------------------------------------------------------------------------------------------------------------------------------------------------------------------------------------------------------------------------------------------------|---------------------------------------------------------------------------------------------------------------------------------------|---------------------------------------------------------------------------------------------------------------------------------------------------------------------------------------------------------------------------------------------------------------------------------------------------------------------------------------------------------------------------------------------------------------------------------------------------------------------------------------------------------------------------------------------------------------------------------------------------------------------------------------------------------------------------------------------------------------------|

|             |          |       |              |          |                    |         |                                                                                                                                                                                                 |          |                                |       |      |           |                                                                                                                                                                                                                                                                                                                                                                                                                                                                                                                                                                                                                                                              |                                                                                                                                       |                                                                                                                                                                                                                                                                                                                                                                                                                                                                                                                                                                                                                                                                                                                     |
|-------------|----------|-------|--------------|----------|--------------------|---------|-------------------------------------------------------------------------------------------------------------------------------------------------------------------------------------------------|----------|--------------------------------|-------|------|-----------|--------------------------------------------------------------------------------------------------------------------------------------------------------------------------------------------------------------------------------------------------------------------------------------------------------------------------------------------------------------------------------------------------------------------------------------------------------------------------------------------------------------------------------------------------------------------------------------------------------------------------------------------------------------|---------------------------------------------------------------------------------------------------------------------------------------|---------------------------------------------------------------------------------------------------------------------------------------------------------------------------------------------------------------------------------------------------------------------------------------------------------------------------------------------------------------------------------------------------------------------------------------------------------------------------------------------------------------------------------------------------------------------------------------------------------------------------------------------------------------------------------------------------------------------|
| 201044_x_at | AA530892 | DUSP1 | Homo sapiens | 6-Oct-14 | Consensus sequence | GenBank | Consensus includes<br>gb:AA530892<br>/FEA=EST<br>/DB_XREF=gj:2273598<br>/DB_XREF=est:ni97d11.s1<br>/CLONE=IMAGE:984789<br>/UG=Hs.171695<br>dual specificity phosphatase 1<br>/FL=gb:NM_004417.2 | AA530892 | dual specificity phosphatase 1 | DUSP1 | 1843 | NM_004417 | 0000188 // inactivation of MAPK activity // inferred from sequence or structural similarity /// 0001706 // endoderm formation // not recorded /// 0006470 // protein dephosphorylation // not recorded /// 0006950 // response to stress // inferred from electronic annotation /// 0006979 // response to oxidative stress // traceable author statement /// 0007049 // cell cycle // inferred from electronic annotation /// 0009416 // response to light stimulus // inferred from electronic annotation /// 0010033 // response to organic substance // inferred from electronic annotation /// 0016311 // dephosphorylation // inferred from electronic | 0005634 // nucleus // inferred from direct assay /// 0005654 // nucleoplasm // /// 0005737 // cytoplasm // inferred from direct assay | 0004721 // phosphoprotein phosphatase activity // inferred from electronic annotation /// 0004725 // protein tyrosine phosphatase activity // inferred from electronic annotation /// 0004726 // non-membrane spanning protein tyrosine phosphatase activity // traceable author statement /// 0005515 // protein binding // inferred from physical interaction /// 0008138 // protein tyrosine/serine/threonine phosphatase activity // not recorded /// 0008330 // protein tyrosine/threonine phosphatase activity // inferred from electronic annotation /// 0016787 // hydrolase activity // inferred from electronic annotation /// 0016791 // phosphatase activity // inferred from electronic annotation /// |
|-------------|----------|-------|--------------|----------|--------------------|---------|-------------------------------------------------------------------------------------------------------------------------------------------------------------------------------------------------|----------|--------------------------------|-------|------|-----------|--------------------------------------------------------------------------------------------------------------------------------------------------------------------------------------------------------------------------------------------------------------------------------------------------------------------------------------------------------------------------------------------------------------------------------------------------------------------------------------------------------------------------------------------------------------------------------------------------------------------------------------------------------------|---------------------------------------------------------------------------------------------------------------------------------------|---------------------------------------------------------------------------------------------------------------------------------------------------------------------------------------------------------------------------------------------------------------------------------------------------------------------------------------------------------------------------------------------------------------------------------------------------------------------------------------------------------------------------------------------------------------------------------------------------------------------------------------------------------------------------------------------------------------------|



|             |          |       |              |          |                    |         |                                                                                                                                                                                   |          |                  |       |      |           |                                                                                                                                                                                                                                                                                                                                                                                                                                                                                                                                                                                                                                                    |                                                                                                                                                                                                                                                                                                                                                                                                        |                                                                                                                                                                                                                                                                                                                                                                                                                                                                                                                                                                                                                                                                                                                          |
|-------------|----------|-------|--------------|----------|--------------------|---------|-----------------------------------------------------------------------------------------------------------------------------------------------------------------------------------|----------|------------------|-------|------|-----------|----------------------------------------------------------------------------------------------------------------------------------------------------------------------------------------------------------------------------------------------------------------------------------------------------------------------------------------------------------------------------------------------------------------------------------------------------------------------------------------------------------------------------------------------------------------------------------------------------------------------------------------------------|--------------------------------------------------------------------------------------------------------------------------------------------------------------------------------------------------------------------------------------------------------------------------------------------------------------------------------------------------------------------------------------------------------|--------------------------------------------------------------------------------------------------------------------------------------------------------------------------------------------------------------------------------------------------------------------------------------------------------------------------------------------------------------------------------------------------------------------------------------------------------------------------------------------------------------------------------------------------------------------------------------------------------------------------------------------------------------------------------------------------------------------------|
| 201107_s_at | AI812030 | THBS1 | Homo sapiens | 6-Oct-14 | Consensus sequence | GenBank | Consensus includes<br>gb:AI812030<br>/FEA=EST<br>/DB_XREF=gi:5398596<br>/DB_XREF=est:tw46c12.x1<br>/CLONE=IMAGE:2262742<br>/UG=Hs.87409<br>thrombospondin 1<br>/FL=gb:NM_003246.1 | AI812030 | thrombospondin 1 | THBS1 | 7057 | NM_003246 | 0000187 // activation of MAPK activity // inferred from mutant phenotype /// 0001666 // response to hypoxia // non-traceable author statement /// 0001937 // negative regulation of endothelial cell proliferation // inferred from direct assay /// 0001937 // negative regulation of endothelial cell proliferation // inferred from mutant phenotype /// 0001953 // negative regulation of cell-matrix adhesion // inferred from direct assay /// 0002040 // sprouting angiogenesis // inferred from mutant phenotype /// 0002544 // chronic inflammatory response // inferred from expression pattern /// 0002576 // platelet degranulation // | 0005576 // extracellular region // traceable author statement /// 0005577 // fibrinogen complex // inferred from direct assay /// 0005615 // extracellular space // inferred from direct assay /// 0005737 // cytoplasm // inferred from electronic annotation /// 0005783 // endoplasmic reticulum // inferred from sequence or structural similarity /// 0009897 // external side of plasma membrane | 0001786 // phosphatidylserine binding // inferred from direct assay /// 0001948 // glycoprotein binding // non-traceable author statement /// 0001968 // fibronectin binding // inferred from direct assay /// 0005178 // integrin binding // inferred from mutant phenotype /// 0005509 // calcium ion binding // non-traceable author statement /// 0005515 // protein binding // inferred from physical interaction /// 0008201 // heparin binding // inferred from direct assay /// 0017134 // fibroblast growth factor binding // inferred from direct assay /// 0030169 // low-density lipoprotein particle binding // inferred from direct assay /// 0042802 // identical protein binding // non-traceable author |
|-------------|----------|-------|--------------|----------|--------------------|---------|-----------------------------------------------------------------------------------------------------------------------------------------------------------------------------------|----------|------------------|-------|------|-----------|----------------------------------------------------------------------------------------------------------------------------------------------------------------------------------------------------------------------------------------------------------------------------------------------------------------------------------------------------------------------------------------------------------------------------------------------------------------------------------------------------------------------------------------------------------------------------------------------------------------------------------------------------|--------------------------------------------------------------------------------------------------------------------------------------------------------------------------------------------------------------------------------------------------------------------------------------------------------------------------------------------------------------------------------------------------------|--------------------------------------------------------------------------------------------------------------------------------------------------------------------------------------------------------------------------------------------------------------------------------------------------------------------------------------------------------------------------------------------------------------------------------------------------------------------------------------------------------------------------------------------------------------------------------------------------------------------------------------------------------------------------------------------------------------------------|

|             |          |       |              |          |                    |         |                                                                                                                                                                                 |          |                  |       |      |           |                                                                                                                                                                                                                                                                                                                                                                                                                                                                                                                                                                                                                                                    |                                                                                                                                                                                                                                                                                                                                                                                                        |                                                                                                                                                                                                                                                                                                                                                                                                                                                                                                                                                                                                                                                                                                                          |
|-------------|----------|-------|--------------|----------|--------------------|---------|---------------------------------------------------------------------------------------------------------------------------------------------------------------------------------|----------|------------------|-------|------|-----------|----------------------------------------------------------------------------------------------------------------------------------------------------------------------------------------------------------------------------------------------------------------------------------------------------------------------------------------------------------------------------------------------------------------------------------------------------------------------------------------------------------------------------------------------------------------------------------------------------------------------------------------------------|--------------------------------------------------------------------------------------------------------------------------------------------------------------------------------------------------------------------------------------------------------------------------------------------------------------------------------------------------------------------------------------------------------|--------------------------------------------------------------------------------------------------------------------------------------------------------------------------------------------------------------------------------------------------------------------------------------------------------------------------------------------------------------------------------------------------------------------------------------------------------------------------------------------------------------------------------------------------------------------------------------------------------------------------------------------------------------------------------------------------------------------------|
| 201108_s_at | BF055462 | THBS1 | Homo sapiens | 6-Oct-14 | Consensus sequence | GenBank | Consensus includes<br>gb:BF055462<br>/FEA=EST<br>/DB_XREF=gi:10809358<br>/DB_XREF=est:7j80e06.x1<br>/CLONE=IMAGE:3392770<br>/UG=Hs.87409 thrombospondin 1<br>/FL=gb:NM_003246.1 | BF055462 | thrombospondin 1 | THBS1 | 7057 | NM_003246 | 0000187 // activation of MAPK activity // inferred from mutant phenotype /// 0001666 // response to hypoxia // non-traceable author statement /// 0001937 // negative regulation of endothelial cell proliferation // inferred from direct assay /// 0001937 // negative regulation of endothelial cell proliferation // inferred from mutant phenotype /// 0001953 // negative regulation of cell-matrix adhesion // inferred from direct assay /// 0002040 // sprouting angiogenesis // inferred from mutant phenotype /// 0002544 // chronic inflammatory response // inferred from expression pattern /// 0002576 // platelet degranulation // | 0005576 // extracellular region // traceable author statement /// 0005577 // fibrinogen complex // inferred from direct assay /// 0005615 // extracellular space // inferred from direct assay /// 0005737 // cytoplasm // inferred from electronic annotation /// 0005783 // endoplasmic reticulum // inferred from sequence or structural similarity /// 0009897 // external side of plasma membrane | 0001786 // phosphatidylserine binding // inferred from direct assay /// 0001948 // glycoprotein binding // non-traceable author statement /// 0001968 // fibronectin binding // inferred from direct assay /// 0005178 // integrin binding // inferred from mutant phenotype /// 0005509 // calcium ion binding // non-traceable author statement /// 0005515 // protein binding // inferred from physical interaction /// 0008201 // heparin binding // inferred from direct assay /// 0017134 // fibroblast growth factor binding // inferred from direct assay /// 0030169 // low-density lipoprotein particle binding // inferred from direct assay /// 0042802 // identical protein binding // non-traceable author |
|-------------|----------|-------|--------------|----------|--------------------|---------|---------------------------------------------------------------------------------------------------------------------------------------------------------------------------------|----------|------------------|-------|------|-----------|----------------------------------------------------------------------------------------------------------------------------------------------------------------------------------------------------------------------------------------------------------------------------------------------------------------------------------------------------------------------------------------------------------------------------------------------------------------------------------------------------------------------------------------------------------------------------------------------------------------------------------------------------|--------------------------------------------------------------------------------------------------------------------------------------------------------------------------------------------------------------------------------------------------------------------------------------------------------------------------------------------------------------------------------------------------------|--------------------------------------------------------------------------------------------------------------------------------------------------------------------------------------------------------------------------------------------------------------------------------------------------------------------------------------------------------------------------------------------------------------------------------------------------------------------------------------------------------------------------------------------------------------------------------------------------------------------------------------------------------------------------------------------------------------------------|

|             |          |       |              |          |                    |         |                                                                                                                                                                           |          |                  |       |      |           |                                                                                                                                                                                                                                                                                                                                                                                                                                                                                                                                                                                                                                                    |                                                                                                                                                                                                                                                                                                                                                                                                        |                                                                                                                                                                                                                                                                                                                                                                                                                                                                                                                                                                                                                                                                                                                          |
|-------------|----------|-------|--------------|----------|--------------------|---------|---------------------------------------------------------------------------------------------------------------------------------------------------------------------------|----------|------------------|-------|------|-----------|----------------------------------------------------------------------------------------------------------------------------------------------------------------------------------------------------------------------------------------------------------------------------------------------------------------------------------------------------------------------------------------------------------------------------------------------------------------------------------------------------------------------------------------------------------------------------------------------------------------------------------------------------|--------------------------------------------------------------------------------------------------------------------------------------------------------------------------------------------------------------------------------------------------------------------------------------------------------------------------------------------------------------------------------------------------------|--------------------------------------------------------------------------------------------------------------------------------------------------------------------------------------------------------------------------------------------------------------------------------------------------------------------------------------------------------------------------------------------------------------------------------------------------------------------------------------------------------------------------------------------------------------------------------------------------------------------------------------------------------------------------------------------------------------------------|
| 201109_s_at | AV726673 | THBS1 | Homo sapiens | 6-Oct-14 | Consensus sequence | GenBank | Consensus includes<br>gb:AV726673<br>/FEA=EST<br>/DB_XREF=gi:10836094<br>/DB_XREF=est:AV726673<br>/CLONE=HTCBG C12<br>/UG=Hs.87409 thrombospondin 1<br>/FL=gb:NM_003246.1 | AV726673 | thrombospondin 1 | THBS1 | 7057 | NM_003246 | 0000187 // activation of MAPK activity // inferred from mutant phenotype /// 0001666 // response to hypoxia // non-traceable author statement /// 0001937 // negative regulation of endothelial cell proliferation // inferred from direct assay /// 0001937 // negative regulation of endothelial cell proliferation // inferred from mutant phenotype /// 0001953 // negative regulation of cell-matrix adhesion // inferred from direct assay /// 0002040 // sprouting angiogenesis // inferred from mutant phenotype /// 0002544 // chronic inflammatory response // inferred from expression pattern /// 0002576 // platelet degranulation // | 0005576 // extracellular region // traceable author statement /// 0005577 // fibrinogen complex // inferred from direct assay /// 0005615 // extracellular space // inferred from direct assay /// 0005737 // cytoplasm // inferred from electronic annotation /// 0005783 // endoplasmic reticulum // inferred from sequence or structural similarity /// 0009897 // external side of plasma membrane | 0001786 // phosphatidylserine binding // inferred from direct assay /// 0001948 // glycoprotein binding // non-traceable author statement /// 0001968 // fibronectin binding // inferred from direct assay /// 0005178 // integrin binding // inferred from mutant phenotype /// 0005509 // calcium ion binding // non-traceable author statement /// 0005515 // protein binding // inferred from physical interaction /// 0008201 // heparin binding // inferred from direct assay /// 0017134 // fibroblast growth factor binding // inferred from direct assay /// 0030169 // low-density lipoprotein particle binding // inferred from direct assay /// 0042802 // identical protein binding // non-traceable author |
|-------------|----------|-------|--------------|----------|--------------------|---------|---------------------------------------------------------------------------------------------------------------------------------------------------------------------------|----------|------------------|-------|------|-----------|----------------------------------------------------------------------------------------------------------------------------------------------------------------------------------------------------------------------------------------------------------------------------------------------------------------------------------------------------------------------------------------------------------------------------------------------------------------------------------------------------------------------------------------------------------------------------------------------------------------------------------------------------|--------------------------------------------------------------------------------------------------------------------------------------------------------------------------------------------------------------------------------------------------------------------------------------------------------------------------------------------------------------------------------------------------------|--------------------------------------------------------------------------------------------------------------------------------------------------------------------------------------------------------------------------------------------------------------------------------------------------------------------------------------------------------------------------------------------------------------------------------------------------------------------------------------------------------------------------------------------------------------------------------------------------------------------------------------------------------------------------------------------------------------------------|

|             |           |       |              |          |                   |         |                                                                                                                                                                                   |           |                  |       |      |           |                                                                                                                                                                                                                                                                                                                                                                                                                                                                                                                                                                                                                                                    |                                                                                                                                                                                                                                                                                                                                                                                                        |                                                                                                                                                                                                                                                                                                                                                                                                                                                                                                                                                                                                                                                                                                                          |
|-------------|-----------|-------|--------------|----------|-------------------|---------|-----------------------------------------------------------------------------------------------------------------------------------------------------------------------------------|-----------|------------------|-------|------|-----------|----------------------------------------------------------------------------------------------------------------------------------------------------------------------------------------------------------------------------------------------------------------------------------------------------------------------------------------------------------------------------------------------------------------------------------------------------------------------------------------------------------------------------------------------------------------------------------------------------------------------------------------------------|--------------------------------------------------------------------------------------------------------------------------------------------------------------------------------------------------------------------------------------------------------------------------------------------------------------------------------------------------------------------------------------------------------|--------------------------------------------------------------------------------------------------------------------------------------------------------------------------------------------------------------------------------------------------------------------------------------------------------------------------------------------------------------------------------------------------------------------------------------------------------------------------------------------------------------------------------------------------------------------------------------------------------------------------------------------------------------------------------------------------------------------------|
| 201110_s_at | NM_003246 | THBS1 | Homo sapiens | 6-Oct-14 | Exemplar sequence | GenBank | gb:NM_003246.1 /DEF=Homo sapiens thrombospondin 1 (THBS1), mRNA. /FEA=mRNA /GEN=THBS1 /PROD=thrombospondin 1 /DB_XREF=gi:4507484 /UG=Hs.87409 thrombospondin 1 /FL=gb:NM_003246.1 | NM_003246 | thrombospondin 1 | THBS1 | 7057 | NM_003246 | 0000187 // activation of MAPK activity // inferred from mutant phenotype /// 0001666 // response to hypoxia // non-traceable author statement /// 0001937 // negative regulation of endothelial cell proliferation // inferred from direct assay /// 0001937 // negative regulation of endothelial cell proliferation // inferred from mutant phenotype /// 0001953 // negative regulation of cell-matrix adhesion // inferred from direct assay /// 0002040 // sprouting angiogenesis // inferred from mutant phenotype /// 0002544 // chronic inflammatory response // inferred from expression pattern /// 0002576 // platelet degranulation // | 0005576 // extracellular region // traceable author statement /// 0005577 // fibrinogen complex // inferred from direct assay /// 0005615 // extracellular space // inferred from direct assay /// 0005737 // cytoplasm // inferred from electronic annotation /// 0005783 // endoplasmic reticulum // inferred from sequence or structural similarity /// 0009897 // external side of plasma membrane | 0001786 // phosphatidylserine binding // inferred from direct assay /// 0001948 // glycoprotein binding // non-traceable author statement /// 0001968 // fibronectin binding // inferred from direct assay /// 0005178 // integrin binding // inferred from mutant phenotype /// 0005509 // calcium ion binding // non-traceable author statement /// 0005515 // protein binding // inferred from physical interaction /// 0008201 // heparin binding // inferred from direct assay /// 0017134 // fibroblast growth factor binding // inferred from direct assay /// 0030169 // low-density lipoprotein particle binding // inferred from direct assay /// 0042802 // identical protein binding // non-traceable author |
|-------------|-----------|-------|--------------|----------|-------------------|---------|-----------------------------------------------------------------------------------------------------------------------------------------------------------------------------------|-----------|------------------|-------|------|-----------|----------------------------------------------------------------------------------------------------------------------------------------------------------------------------------------------------------------------------------------------------------------------------------------------------------------------------------------------------------------------------------------------------------------------------------------------------------------------------------------------------------------------------------------------------------------------------------------------------------------------------------------------------|--------------------------------------------------------------------------------------------------------------------------------------------------------------------------------------------------------------------------------------------------------------------------------------------------------------------------------------------------------------------------------------------------------|--------------------------------------------------------------------------------------------------------------------------------------------------------------------------------------------------------------------------------------------------------------------------------------------------------------------------------------------------------------------------------------------------------------------------------------------------------------------------------------------------------------------------------------------------------------------------------------------------------------------------------------------------------------------------------------------------------------------------|

|             |          |      |              |          |                    |         |                                                                                                                                                                                                        |          |                      |      |      |           |                                                                                                                                                                                                                                                                                                                                                                                                                                                                                                                                                                                                                                 |                                                                          |                                                                                                                                                                                                                                                                                     |
|-------------|----------|------|--------------|----------|--------------------|---------|--------------------------------------------------------------------------------------------------------------------------------------------------------------------------------------------------------|----------|----------------------|------|------|-----------|---------------------------------------------------------------------------------------------------------------------------------------------------------------------------------------------------------------------------------------------------------------------------------------------------------------------------------------------------------------------------------------------------------------------------------------------------------------------------------------------------------------------------------------------------------------------------------------------------------------------------------|--------------------------------------------------------------------------|-------------------------------------------------------------------------------------------------------------------------------------------------------------------------------------------------------------------------------------------------------------------------------------|
| 201235_s_at | BG339064 | BTG2 | Homo sapiens | 6-Oct-14 | Consensus sequence | GenBank | Consensus includes<br>gb:BG339064<br>/FEA=EST<br>/DB_XREF=gj:13145502<br>/DB_XREF=est:602436889F1<br>/CLONE=IMAGE:4554551<br>/UG=Hs.75462<br>BTG family, member 2<br>/FL=gb:U72649.1<br>gb:NM_006763.1 | BG339064 | BTG family, member 2 | BTG2 | 7832 | NM_006763 | 0006281 // DNA repair // traceable author statement /// 0006351 // transcription, DNA-templated // inferred from electronic annotation /// 0006355 // regulation of transcription, DNA-templated // inferred from electronic annotation /// 0006479 // protein methylation // inferred from electronic annotation /// 0006974 // cellular response to DNA damage stimulus // inferred from direct assay /// 0008285 // negative regulation of cell proliferation // inferred from mutant phenotype /// 0008306 // associative learning // inferred from electronic annotation /// 0009612 // response to mechanical stimulus // | 0070062 // extracellular vesicular exosome // inferred from direct assay | 0001077 // RNA polymerase II core promoter proximal region sequence-specific DNA binding transcription factor activity involved in positive regulation of transcription // inferred from electronic annotation /// 0005515 // protein binding // inferred from physical interaction |
|-------------|----------|------|--------------|----------|--------------------|---------|--------------------------------------------------------------------------------------------------------------------------------------------------------------------------------------------------------|----------|----------------------|------|------|-----------|---------------------------------------------------------------------------------------------------------------------------------------------------------------------------------------------------------------------------------------------------------------------------------------------------------------------------------------------------------------------------------------------------------------------------------------------------------------------------------------------------------------------------------------------------------------------------------------------------------------------------------|--------------------------------------------------------------------------|-------------------------------------------------------------------------------------------------------------------------------------------------------------------------------------------------------------------------------------------------------------------------------------|

|             |           |      |              |          |                   |         |                                                                                                                                                                                                         |           |                      |      |      |           |                                                                                                                                                                                                                                                                                                                                                                                                                                                                                                                                                                                                                                 |                                                                          |                                                                                                                                                                                                                                                                                     |
|-------------|-----------|------|--------------|----------|-------------------|---------|---------------------------------------------------------------------------------------------------------------------------------------------------------------------------------------------------------|-----------|----------------------|------|------|-----------|---------------------------------------------------------------------------------------------------------------------------------------------------------------------------------------------------------------------------------------------------------------------------------------------------------------------------------------------------------------------------------------------------------------------------------------------------------------------------------------------------------------------------------------------------------------------------------------------------------------------------------|--------------------------------------------------------------------------|-------------------------------------------------------------------------------------------------------------------------------------------------------------------------------------------------------------------------------------------------------------------------------------|
| 201236_s_at | NM_006763 | BTG2 | Homo sapiens | 6-Oct-14 | Exemplar sequence | GenBank | gb:NM_006763.1 /DEF=Homo sapiens BTG family, member 2 (BTG2), mRNA. /FEA=mRNA /GEN=BTG2 /PROD=BTG family, member 2 /DB_XREF=gi:5802987 /UG=Hs.75462 BTG family, member 2 /FL=gb:U72649.1 gb:NM_006763.1 | NM_006763 | BTG family, member 2 | BTG2 | 7832 | NM_006763 | 0006281 // DNA repair // traceable author statement /// 0006351 // transcription, DNA-templated // inferred from electronic annotation /// 0006355 // regulation of transcription, DNA-templated // inferred from electronic annotation /// 0006479 // protein methylation // inferred from electronic annotation /// 0006974 // cellular response to DNA damage stimulus // inferred from direct assay /// 0008285 // negative regulation of cell proliferation // inferred from mutant phenotype /// 0008306 // associative learning // inferred from electronic annotation /// 0009612 // response to mechanical stimulus // | 0070062 // extracellular vesicular exosome // inferred from direct assay | 0001077 // RNA polymerase II core promoter proximal region sequence-specific DNA binding transcription factor activity involved in positive regulation of transcription // inferred from electronic annotation /// 0005515 // protein binding // inferred from physical interaction |
|-------------|-----------|------|--------------|----------|-------------------|---------|---------------------------------------------------------------------------------------------------------------------------------------------------------------------------------------------------------|-----------|----------------------|------|------|-----------|---------------------------------------------------------------------------------------------------------------------------------------------------------------------------------------------------------------------------------------------------------------------------------------------------------------------------------------------------------------------------------------------------------------------------------------------------------------------------------------------------------------------------------------------------------------------------------------------------------------------------------|--------------------------------------------------------------------------|-------------------------------------------------------------------------------------------------------------------------------------------------------------------------------------------------------------------------------------------------------------------------------------|

|           |           |       |              |          |                   |         |                                                                                                                                                                                 |           |             |       |      |                                                              |                                                                                                                                                                                                                                                                                                                                                                                                                                                                                                                                 |                                                                                                                                                                                                                                                                                                                                                                                                           |                                                                                                                                                              |
|-----------|-----------|-------|--------------|----------|-------------------|---------|---------------------------------------------------------------------------------------------------------------------------------------------------------------------------------|-----------|-------------|-------|------|--------------------------------------------------------------|---------------------------------------------------------------------------------------------------------------------------------------------------------------------------------------------------------------------------------------------------------------------------------------------------------------------------------------------------------------------------------------------------------------------------------------------------------------------------------------------------------------------------------|-----------------------------------------------------------------------------------------------------------------------------------------------------------------------------------------------------------------------------------------------------------------------------------------------------------------------------------------------------------------------------------------------------------|--------------------------------------------------------------------------------------------------------------------------------------------------------------|
| 201350_at | NM_004475 | FLOT2 | Homo sapiens | 6-Oct-14 | Exemplar sequence | GenBank | gb:NM_004475.1 /DEF=Homo sapiens flotillin 2 (FLOT2), mRNA. /FEA=mRNA /GEN=FLOT2 /PROD=flotillin 2 /DB_XREF=gi:4758393 /UG=Hs.184488 flotillin 2 /FL=gb:NM_004475.1 gb:M60922.1 | NM_004475 | flotillin 2 | FLOT2 | 2319 | NM_004475 /// XM_005257950 /// XM_005257952 /// XM_005257953 | 0007155 // cell adhesion // inferred from electronic annotation /// 0008544 // epidermis development // traceable author statement /// 0010629 // negative regulation of gene expression // inferred from mutant phenotype /// 0050821 // protein stabilization // inferred from mutant phenotype /// 0090002 // establishment of protein localization to plasma membrane // inferred from mutant phenotype /// 1902992 // negative regulation of amyloid precursor protein catabolic process // inferred from mutant phenotype | 0002080 // acrosomal membrane // inferred from electronic annotation /// 0005768 // endosome // inferred from direct assay /// 0005886 // plasma membrane // non-traceable author statement /// 0005901 // caveola // inferred from direct assay /// 0009986 // cell surface // inferred from direct assay /// 0016020 // membrane // inferred from direct assay /// 0016020 // membrane // inferred from | 0005515 // protein binding // inferred from physical interaction /// 0035255 // ionotropic glutamate receptor binding // inferred from electronic annotation |
|-----------|-----------|-------|--------------|----------|-------------------|---------|---------------------------------------------------------------------------------------------------------------------------------------------------------------------------------|-----------|-------------|-------|------|--------------------------------------------------------------|---------------------------------------------------------------------------------------------------------------------------------------------------------------------------------------------------------------------------------------------------------------------------------------------------------------------------------------------------------------------------------------------------------------------------------------------------------------------------------------------------------------------------------|-----------------------------------------------------------------------------------------------------------------------------------------------------------------------------------------------------------------------------------------------------------------------------------------------------------------------------------------------------------------------------------------------------------|--------------------------------------------------------------------------------------------------------------------------------------------------------------|

|           |           |       |              |          |                   |         |                                                                                                                                                                                                      |           |                 |       |      |           |                                                                                                                                                                                                                                                                                                                                                                                                                                                                                                                                                                                                                                                                               |                                                                                                                                                                                                                                                                                                                                                                                                           |                                                                                                                                                                                                                                                                                                                                                                                                                                                                      |
|-----------|-----------|-------|--------------|----------|-------------------|---------|------------------------------------------------------------------------------------------------------------------------------------------------------------------------------------------------------|-----------|-----------------|-------|------|-----------|-------------------------------------------------------------------------------------------------------------------------------------------------------------------------------------------------------------------------------------------------------------------------------------------------------------------------------------------------------------------------------------------------------------------------------------------------------------------------------------------------------------------------------------------------------------------------------------------------------------------------------------------------------------------------------|-----------------------------------------------------------------------------------------------------------------------------------------------------------------------------------------------------------------------------------------------------------------------------------------------------------------------------------------------------------------------------------------------------------|----------------------------------------------------------------------------------------------------------------------------------------------------------------------------------------------------------------------------------------------------------------------------------------------------------------------------------------------------------------------------------------------------------------------------------------------------------------------|
| 201505_at | NM_002291 | LAMB1 | Homo sapiens | 6-Oct-14 | Exemplar sequence | GenBank | gb:NM_002291.1 /DEF=Homo sapiens laminin, beta 1 (LAMB1), mRNA. /FEA=mRNA /GEN=LAMB1 /PROD=laminin, beta 1 precursor /DB_XREF=gi:4504950 /UG=Hs.82124 laminin, beta 1 /FL=gb:M61916.1 gb:NM_002291.1 | NM_002291 | laminin, beta 1 | LAMB1 | 3912 | NM_002291 | 0007155 // cell adhesion // traceable author statement /// 0007162 // negative regulation of cell adhesion // inferred from electronic annotation /// 0007411 // axon guidance // traceable author statement /// 0007566 // embryo implantation // inferred from electronic annotation /// 0016192 // vesicle-mediated transport // inferred from electronic annotation /// 0016477 // cell migration // inferred from electronic annotation /// 0021812 // neuronal-glia interaction involved in cerebral cortex radial glia guided migration // inferred from mutant phenotype /// 0022617 // extracellular matrix disassembly // traceable author statement /// 0030198 // | 0005576 // extracellular region // traceable author statement /// 0005578 // proteinaceous extracellular matrix // inferred from electronic annotation /// 0005604 // basement membrane // inferred from direct assay /// 0005604 // basement membrane // traceable author statement /// 0005605 // basal lamina // inferred from electronic annotation /// 0005606 // laminin-1 complex // inferred from | 0005178 // integrin binding // inferred from electronic annotation /// 0005198 // structural molecule activity // non-traceable author statement /// 0005201 // extracellular matrix structural constituent // inferred from direct assay /// 0005515 // protein binding // inferred from electronic annotation /// 0019899 // enzyme binding // inferred from electronic annotation /// 0043208 // glycosphingolipid binding // inferred from electronic annotation |
|-----------|-----------|-------|--------------|----------|-------------------|---------|------------------------------------------------------------------------------------------------------------------------------------------------------------------------------------------------------|-----------|-----------------|-------|------|-----------|-------------------------------------------------------------------------------------------------------------------------------------------------------------------------------------------------------------------------------------------------------------------------------------------------------------------------------------------------------------------------------------------------------------------------------------------------------------------------------------------------------------------------------------------------------------------------------------------------------------------------------------------------------------------------------|-----------------------------------------------------------------------------------------------------------------------------------------------------------------------------------------------------------------------------------------------------------------------------------------------------------------------------------------------------------------------------------------------------------|----------------------------------------------------------------------------------------------------------------------------------------------------------------------------------------------------------------------------------------------------------------------------------------------------------------------------------------------------------------------------------------------------------------------------------------------------------------------|



|           |           |        |              |          |                   |         |                                                                                                                                                                                                                                                                     |           |                                        |        |      |                                                                                                                                                                                                                                                                                   |                                                                                                                                                                                                                                                                                                                                                                                                                                                                                                                                                                                                                                                       |                                                                                                                                                                                           |                                                                                                                                                                                                                                                                                                                                                                                                                                                                                                                                                                                                             |
|-----------|-----------|--------|--------------|----------|-------------------|---------|---------------------------------------------------------------------------------------------------------------------------------------------------------------------------------------------------------------------------------------------------------------------|-----------|----------------------------------------|--------|------|-----------------------------------------------------------------------------------------------------------------------------------------------------------------------------------------------------------------------------------------------------------------------------------|-------------------------------------------------------------------------------------------------------------------------------------------------------------------------------------------------------------------------------------------------------------------------------------------------------------------------------------------------------------------------------------------------------------------------------------------------------------------------------------------------------------------------------------------------------------------------------------------------------------------------------------------------------|-------------------------------------------------------------------------------------------------------------------------------------------------------------------------------------------|-------------------------------------------------------------------------------------------------------------------------------------------------------------------------------------------------------------------------------------------------------------------------------------------------------------------------------------------------------------------------------------------------------------------------------------------------------------------------------------------------------------------------------------------------------------------------------------------------------------|
| 201546_at | NM_004238 | TRIP12 | Homo sapiens | 6-Oct-14 | Exemplar sequence | GenBank | gb:NM_004238.1 /DEF=Homo sapiens thyroid hormone receptor interactor 12 (TRIP12), mRNA. /FEA=mRNA /GEN=TRIP12 /PROD=thyroid hormone receptor interactor 12 /DB_XREF=gi:10863902 /UG=Hs.138617 thyroid hormone receptor interactor 12 /FL=gb:NM_004238.1 gb:D28476.1 | NM_004238 | thyroid hormone receptor interactor 12 | TRIP12 | 9320 | NM_001284214 ///<br>NM_001284215 ///<br>NM_001284216 ///<br>NM_004238 ///<br>XM_005246954 ///<br>XM_005246955 ///<br>XM_005246956 ///<br>XM_005246957 ///<br>XM_005246958 ///<br>XM_005246960 ///<br>XM_005246961 ///<br>XM_005246962 ///<br>XM_005246963 ///<br>XM_006712852 /// | 0006281 // DNA repair // inferred from electronic annotation /// 0006974 // cellular response to DNA damage stimulus // inferred from mutant phenotype /// 0008152 // metabolic process // inferred from electronic annotation /// 0009790 // embryo development // inferred from sequence or structural similarity /// 0016567 // protein ubiquitination // inferred from electronic annotation /// 0016567 // protein ubiquitination // non-traceable author statement /// 0042787 // protein ubiquitination involved in ubiquitin-dependent protein catabolic process // not recorded /// 0042787 // protein ubiquitination involved in ubiquitin- | 0005634 // nucleus // not recorded /// 0005634 // nucleus // inferred from direct assay /// 0005654 // nucleoplasm // inferred from direct assay /// 0005737 // cytoplasm // not recorded | 0004842 // ubiquitin-protein transferase activity // not recorded /// 0004842 // ubiquitin-protein transferase activity // inferred from direct assay /// 0004842 // ubiquitin-protein transferase activity // inferred from mutant phenotype /// 0005488 // binding // inferred from electronic annotation /// 0005515 // protein binding // inferred from physical interaction /// 0008270 // zinc ion binding // inferred from electronic annotation /// 0016874 // ligase activity // inferred from electronic annotation /// 0046966 // thyroid hormone receptor binding // inferred from direct assay |
|-----------|-----------|--------|--------------|----------|-------------------|---------|---------------------------------------------------------------------------------------------------------------------------------------------------------------------------------------------------------------------------------------------------------------------|-----------|----------------------------------------|--------|------|-----------------------------------------------------------------------------------------------------------------------------------------------------------------------------------------------------------------------------------------------------------------------------------|-------------------------------------------------------------------------------------------------------------------------------------------------------------------------------------------------------------------------------------------------------------------------------------------------------------------------------------------------------------------------------------------------------------------------------------------------------------------------------------------------------------------------------------------------------------------------------------------------------------------------------------------------------|-------------------------------------------------------------------------------------------------------------------------------------------------------------------------------------------|-------------------------------------------------------------------------------------------------------------------------------------------------------------------------------------------------------------------------------------------------------------------------------------------------------------------------------------------------------------------------------------------------------------------------------------------------------------------------------------------------------------------------------------------------------------------------------------------------------------|

|             |          |       |              |          |                    |         |                                                                                                                                                                                                                                                                 |          |                                                        |       |       |                                                                       |                                                                                                                                                                                                                                                                                                                                                                                                                                                                                                                                                                                                                  |                                                                                                                                                                                                                              |                                                                                                                                                                                                                                                                                |
|-------------|----------|-------|--------------|----------|--------------------|---------|-----------------------------------------------------------------------------------------------------------------------------------------------------------------------------------------------------------------------------------------------------------------|----------|--------------------------------------------------------|-------|-------|-----------------------------------------------------------------------|------------------------------------------------------------------------------------------------------------------------------------------------------------------------------------------------------------------------------------------------------------------------------------------------------------------------------------------------------------------------------------------------------------------------------------------------------------------------------------------------------------------------------------------------------------------------------------------------------------------|------------------------------------------------------------------------------------------------------------------------------------------------------------------------------------------------------------------------------|--------------------------------------------------------------------------------------------------------------------------------------------------------------------------------------------------------------------------------------------------------------------------------|
| 201638_s_at | BE676642 | CPSF1 | Homo sapiens | 6-Oct-14 | Consensus sequence | GenBank | Consensus includes<br>gb:BE676642<br>/FEA=EST<br>/DB_XREF=gi:10037183<br>/DB_XREF=est:7f33f02.x1<br>/CLONE=IMAGE:3296475<br>/UG=Hs.83727<br>cleavage and polyadenylation specific factor 1, 160kD subunit<br>/FL=gb:U37012.1<br>gb:AB046744.1<br>gb:NM_013291.1 | BE676642 | cleavage and polyadenylation specific factor 1, 160kDa | CPSF1 | 29894 | NM_013291 ///<br>XM_006716548 ///<br>XM_006716549 ///<br>XM_006716550 | 0000398 // mRNA splicing, via spliceosome // traceable author statement /// 0006366 // transcription from RNA polymerase II promoter // traceable author statement /// 0006369 // termination of RNA polymerase II transcription // traceable author statement /// 0006378 // mRNA polyadenylation // inferred from direct assay /// 0006379 // mRNA cleavage // inferred from direct assay /// 0006397 // mRNA processing // inferred from electronic annotation /// 0006406 // mRNA export from nucleus // traceable author statement /// 0008380 // RNA splicing // traceable author statement /// 0010467 // | 0005634 // nucleus // inferred from electronic annotation /// 0005654 // nucleoplasm // traceable author statement /// 0005847 // mRNA cleavage and polyadenylation specificity factor complex // inferred from direct assay | 0003676 // nucleic acid binding // inferred from electronic annotation /// 0003723 // RNA binding // inferred from electronic annotation /// 0003730 // mRNA 3'-UTR binding // inferred from direct assay /// 0005515 // protein binding // inferred from physical interaction |
|-------------|----------|-------|--------------|----------|--------------------|---------|-----------------------------------------------------------------------------------------------------------------------------------------------------------------------------------------------------------------------------------------------------------------|----------|--------------------------------------------------------|-------|-------|-----------------------------------------------------------------------|------------------------------------------------------------------------------------------------------------------------------------------------------------------------------------------------------------------------------------------------------------------------------------------------------------------------------------------------------------------------------------------------------------------------------------------------------------------------------------------------------------------------------------------------------------------------------------------------------------------|------------------------------------------------------------------------------------------------------------------------------------------------------------------------------------------------------------------------------|--------------------------------------------------------------------------------------------------------------------------------------------------------------------------------------------------------------------------------------------------------------------------------|

|             |           |       |              |          |                   |         |                                                                                                                                           |           |                                                                                                          |                                       |                                                     |                                                                                                  |                                                                                                                                                                                                                                                                                                                                                                                                                                                                                                                                                                                                          |                                                                                                                                                                                                                            |                                                                                                                                                                                                                                                                             |
|-------------|-----------|-------|--------------|----------|-------------------|---------|-------------------------------------------------------------------------------------------------------------------------------------------|-----------|----------------------------------------------------------------------------------------------------------|---------------------------------------|-----------------------------------------------------|--------------------------------------------------------------------------------------------------|----------------------------------------------------------------------------------------------------------------------------------------------------------------------------------------------------------------------------------------------------------------------------------------------------------------------------------------------------------------------------------------------------------------------------------------------------------------------------------------------------------------------------------------------------------------------------------------------------------|----------------------------------------------------------------------------------------------------------------------------------------------------------------------------------------------------------------------------|-----------------------------------------------------------------------------------------------------------------------------------------------------------------------------------------------------------------------------------------------------------------------------|
| 201639_s_at | NM_013291 | CPSF1 | Homo sapiens | 6-Oct-14 | Exemplar sequence | GenBank | gb:NM_013291.1 /DEF=Homo sapiens cleavage and polyadenylation specific factor 1, 160kDa // microRNA 1234 // microRNA 6849 // microRNA 939 | NM_013291 | cleavage and polyadenylation specific factor 1, 160kDa // microRNA 1234 // microRNA 6849 // microRNA 939 | CPSF1 // MIR1234 // MIR6849 // MIR939 | 29894 // 10012635 // 10030219 // 6 // 10246674 // 9 | NM_013291 // NR_030635 // NR_031600 // NR_106908 // XM_006716548 // XM_006716549 // XM_006716550 | 0000398 // mRNA splicing, via spliceosome // traceable author statement // 0006366 // transcription from RNA polymerase II promoter // traceable author statement // 0006369 // termination of RNA polymerase II transcription // traceable author statement // 0006378 // mRNA polyadenylation // inferred from direct assay // 0006379 // mRNA cleavage // inferred from direct assay // 0006397 // mRNA processing // inferred from electronic annotation // 0006406 // mRNA export from nucleus // traceable author statement // 0008380 // RNA splicing // traceable author statement // 0010467 // | 0005634 // nucleus // inferred from electronic annotation // 0005654 // nucleoplasm // traceable author statement // 0005847 // mRNA cleavage and polyadenylation specificity factor complex // inferred from direct assay | 0003676 // nucleic acid binding // inferred from electronic annotation // 0003723 // RNA binding // inferred from electronic annotation // 0003730 // mRNA 3'-UTR binding // inferred from direct assay // 0005515 // protein binding // inferred from physical interaction |
|-------------|-----------|-------|--------------|----------|-------------------|---------|-------------------------------------------------------------------------------------------------------------------------------------------|-----------|----------------------------------------------------------------------------------------------------------|---------------------------------------|-----------------------------------------------------|--------------------------------------------------------------------------------------------------|----------------------------------------------------------------------------------------------------------------------------------------------------------------------------------------------------------------------------------------------------------------------------------------------------------------------------------------------------------------------------------------------------------------------------------------------------------------------------------------------------------------------------------------------------------------------------------------------------------|----------------------------------------------------------------------------------------------------------------------------------------------------------------------------------------------------------------------------|-----------------------------------------------------------------------------------------------------------------------------------------------------------------------------------------------------------------------------------------------------------------------------|

|             |          |      |              |          |                    |         |                                                                                                                                                                                                    |          |                         |      |      |           |                                                                                                                                                                                                                                                                                                                                                                                                                                                                                                                                                                                                                                         |                                                                                                                                                                                                                                                                                                                                                                               |                                                                                                                                                                                                                                                                                                                                                                                                                                                                                                                                                                                                                                                                                                                                                        |
|-------------|----------|------|--------------|----------|--------------------|---------|----------------------------------------------------------------------------------------------------------------------------------------------------------------------------------------------------|----------|-------------------------|------|------|-----------|-----------------------------------------------------------------------------------------------------------------------------------------------------------------------------------------------------------------------------------------------------------------------------------------------------------------------------------------------------------------------------------------------------------------------------------------------------------------------------------------------------------------------------------------------------------------------------------------------------------------------------------------|-------------------------------------------------------------------------------------------------------------------------------------------------------------------------------------------------------------------------------------------------------------------------------------------------------------------------------------------------------------------------------|--------------------------------------------------------------------------------------------------------------------------------------------------------------------------------------------------------------------------------------------------------------------------------------------------------------------------------------------------------------------------------------------------------------------------------------------------------------------------------------------------------------------------------------------------------------------------------------------------------------------------------------------------------------------------------------------------------------------------------------------------------|
| 201693_s_at | AV733950 | EGR1 | Homo sapiens | 6-Oct-14 | Consensus sequence | GenBank | Consensus includes<br>gb:AV733950<br>/FEA=EST<br>/DB_XREF=gj:10851495<br>/DB_XREF=est:AV733950<br>/CLONE=cdAADG12<br>/UG=Hs.326035<br>early growth response 1<br>/FL=gb:M62829.1<br>gb:NM_001964.1 | AV733950 | early growth response 1 | EGR1 | 1958 | NM_001964 | 0000122 // negative regulation of transcription from RNA polymerase II promoter // inferred from electronic annotation /// 0001975 // response to amphetamine // inferred from electronic annotation /// 0006351 // transcription, DNA-templated // inferred from electronic annotation /// 0006355 // regulation of transcription, DNA-templated // inferred from electronic annotation /// 0006366 // transcription from RNA polymerase II promoter // inferred from direct assay /// 0007611 // learning or memory // inferred from electronic annotation /// 0007623 // circadian rhythm // inferred from electronic annotation /// | 0005634 // nucleus // inferred from direct assay /// 0005634 // nucleus // inferred from sequence or structural similarity /// 0005654 // nucleoplasm // traceable author statement /// 0005730 // nucleolus // inferred from direct assay /// 0005737 // cytoplasm // inferred from direct assay /// 0005737 // cytoplasm // inferred from sequence or structural similarity | 0000976 // transcription regulatory region sequence-specific DNA binding // inferred from direct assay /// 0000977 // RNA polymerase II regulatory region sequence-specific DNA binding // inferred from electronic annotation /// 0000979 // RNA polymerase II core promoter sequence-specific DNA binding // inferred from electronic annotation /// 0000982 // RNA polymerase II core promoter proximal region sequence-specific DNA binding transcription factor activity // inferred from electronic annotation /// 0001077 // RNA polymerase II core promoter proximal region sequence-specific DNA binding transcription factor activity involved in positive regulation of transcription // inferred from electronic annotation /// 0003676 // |
|-------------|----------|------|--------------|----------|--------------------|---------|----------------------------------------------------------------------------------------------------------------------------------------------------------------------------------------------------|----------|-------------------------|------|------|-----------|-----------------------------------------------------------------------------------------------------------------------------------------------------------------------------------------------------------------------------------------------------------------------------------------------------------------------------------------------------------------------------------------------------------------------------------------------------------------------------------------------------------------------------------------------------------------------------------------------------------------------------------------|-------------------------------------------------------------------------------------------------------------------------------------------------------------------------------------------------------------------------------------------------------------------------------------------------------------------------------------------------------------------------------|--------------------------------------------------------------------------------------------------------------------------------------------------------------------------------------------------------------------------------------------------------------------------------------------------------------------------------------------------------------------------------------------------------------------------------------------------------------------------------------------------------------------------------------------------------------------------------------------------------------------------------------------------------------------------------------------------------------------------------------------------------|

|             |           |      |              |          |                   |         |                                                                                                                                                                                                                   |           |                         |      |      |           |                                                                                                                                                                                                                                                                                                                                                                                                                                                                                                                                                                                                                                         |                                                                                                                                                                                                                                                                                                                                                                               |                                                                                                                                                                                                                                                                                                                                                                                                                                                                                                                                                                                                                                                                                                                                                        |
|-------------|-----------|------|--------------|----------|-------------------|---------|-------------------------------------------------------------------------------------------------------------------------------------------------------------------------------------------------------------------|-----------|-------------------------|------|------|-----------|-----------------------------------------------------------------------------------------------------------------------------------------------------------------------------------------------------------------------------------------------------------------------------------------------------------------------------------------------------------------------------------------------------------------------------------------------------------------------------------------------------------------------------------------------------------------------------------------------------------------------------------------|-------------------------------------------------------------------------------------------------------------------------------------------------------------------------------------------------------------------------------------------------------------------------------------------------------------------------------------------------------------------------------|--------------------------------------------------------------------------------------------------------------------------------------------------------------------------------------------------------------------------------------------------------------------------------------------------------------------------------------------------------------------------------------------------------------------------------------------------------------------------------------------------------------------------------------------------------------------------------------------------------------------------------------------------------------------------------------------------------------------------------------------------------|
| 201694_s_at | NM_001964 | EGR1 | Homo sapiens | 6-Oct-14 | Exemplar sequence | GenBank | gb:NM_001964.1 /DEF=Homo sapiens early growth response 1 (EGR1), mRNA. /FEA=mRNA /GEN=EGR1 /PROD=early growth response 1 /DB_XREF=gi:4503492 /UG=Hs.326035 early growth response 1 /FL=gb:M62829.1 gb:NM_001964.1 | NM_001964 | early growth response 1 | EGR1 | 1958 | NM_001964 | 0000122 // negative regulation of transcription from RNA polymerase II promoter // inferred from electronic annotation /// 0001975 // response to amphetamine // inferred from electronic annotation /// 0006351 // transcription, DNA-templated // inferred from electronic annotation /// 0006355 // regulation of transcription, DNA-templated // inferred from electronic annotation /// 0006366 // transcription from RNA polymerase II promoter // inferred from direct assay /// 0007611 // learning or memory // inferred from electronic annotation /// 0007623 // circadian rhythm // inferred from electronic annotation /// | 0005634 // nucleus // inferred from direct assay /// 0005634 // nucleus // inferred from sequence or structural similarity /// 0005654 // nucleoplasm // traceable author statement /// 0005730 // nucleolus // inferred from direct assay /// 0005737 // cytoplasm // inferred from direct assay /// 0005737 // cytoplasm // inferred from sequence or structural similarity | 0000976 // transcription regulatory region sequence-specific DNA binding // inferred from direct assay /// 0000977 // RNA polymerase II regulatory region sequence-specific DNA binding // inferred from electronic annotation /// 0000979 // RNA polymerase II core promoter sequence-specific DNA binding // inferred from electronic annotation /// 0000982 // RNA polymerase II core promoter proximal region sequence-specific DNA binding transcription factor activity // inferred from electronic annotation /// 0001077 // RNA polymerase II core promoter proximal region sequence-specific DNA binding transcription factor activity involved in positive regulation of transcription // inferred from electronic annotation /// 0003676 // |
|-------------|-----------|------|--------------|----------|-------------------|---------|-------------------------------------------------------------------------------------------------------------------------------------------------------------------------------------------------------------------|-----------|-------------------------|------|------|-----------|-----------------------------------------------------------------------------------------------------------------------------------------------------------------------------------------------------------------------------------------------------------------------------------------------------------------------------------------------------------------------------------------------------------------------------------------------------------------------------------------------------------------------------------------------------------------------------------------------------------------------------------------|-------------------------------------------------------------------------------------------------------------------------------------------------------------------------------------------------------------------------------------------------------------------------------------------------------------------------------------------------------------------------------|--------------------------------------------------------------------------------------------------------------------------------------------------------------------------------------------------------------------------------------------------------------------------------------------------------------------------------------------------------------------------------------------------------------------------------------------------------------------------------------------------------------------------------------------------------------------------------------------------------------------------------------------------------------------------------------------------------------------------------------------------------|

|             |          |         |              |          |                   |         |                                                                                                                                                                                                                                                                                                                |          |                                                                           |         |      |                                                                                                                                                                                                                                       |                                                                                                                                                                                                                                                                                                                                                                                                                                                                                                                                                                                                                                                                    |                                                                                                                                                                                                                                                                                                                                                                                       |                                                                                                 |
|-------------|----------|---------|--------------|----------|-------------------|---------|----------------------------------------------------------------------------------------------------------------------------------------------------------------------------------------------------------------------------------------------------------------------------------------------------------------|----------|---------------------------------------------------------------------------|---------|------|---------------------------------------------------------------------------------------------------------------------------------------------------------------------------------------------------------------------------------------|--------------------------------------------------------------------------------------------------------------------------------------------------------------------------------------------------------------------------------------------------------------------------------------------------------------------------------------------------------------------------------------------------------------------------------------------------------------------------------------------------------------------------------------------------------------------------------------------------------------------------------------------------------------------|---------------------------------------------------------------------------------------------------------------------------------------------------------------------------------------------------------------------------------------------------------------------------------------------------------------------------------------------------------------------------------------|-------------------------------------------------------------------------------------------------|
| 201801_s_at | AF079117 | SLC29A1 | Homo sapiens | 6-Oct-14 | Exemplar sequence | GenBank | gb:AF079117.1 /DEF=Homo sapiens equilibrative NBMPR-sensitive nucleoside transporter (ENT1) mRNA, complete cds. /FEA=mRNA /GEN=ENT1 /PROD=equilibrative NBMPR-sensitive nucleoside transporter /DB_XREF=gi:3694939 /UG=Hs.25450 solute carrier family 29 (nucleoside transporters), member 1 /FL=gb:BC001382.1 | AF079117 | solute carrier family 29 (equilibrative nucleoside transporter), member 1 | SLC29A1 | 2030 | NM_001078174 ///<br>NM_001078175 ///<br>NM_001078176 ///<br>NM_001078177 ///<br>NM_004955 ///<br>XM_005248875 ///<br>XM_005248876 ///<br>XM_005248878 ///<br>XM_005248879 ///<br>XM_005248880 ///<br>XM_005248881 ///<br>XM_005248882 | 0006139 // nucleobase-containing compound<br>metabolic process // traceable author statement /// 0006810 // transport // inferred from electronic annotation /// 0007595 // lactation // inferred from electronic annotation /// 0015858 // nucleoside transport // inferred from direct assay /// 0015862 // uridine transport // inferred from electronic annotation /// 0030431 // sleep // inferred from electronic annotation /// 0055085 // transmembrane transport // traceable author statement /// 0060079 // regulation of excitatory postsynaptic membrane potential // inferred from electronic annotation /// 0071333 // cellular response to glucose | 0005886 // plasma membrane // traceable author statement /// 0005887 // integral component of plasma membrane // traceable author statement /// 0016020 // membrane // traceable author statement /// 0016021 // integral component of membrane // inferred from electronic annotation /// 0016323 // basolateral plasma membrane // inferred from direct assay /// 0016324 // apical | 0005337 // nucleoside transmembrane transporter activity // inferred from electronic annotation |
|-------------|----------|---------|--------------|----------|-------------------|---------|----------------------------------------------------------------------------------------------------------------------------------------------------------------------------------------------------------------------------------------------------------------------------------------------------------------|----------|---------------------------------------------------------------------------|---------|------|---------------------------------------------------------------------------------------------------------------------------------------------------------------------------------------------------------------------------------------|--------------------------------------------------------------------------------------------------------------------------------------------------------------------------------------------------------------------------------------------------------------------------------------------------------------------------------------------------------------------------------------------------------------------------------------------------------------------------------------------------------------------------------------------------------------------------------------------------------------------------------------------------------------------|---------------------------------------------------------------------------------------------------------------------------------------------------------------------------------------------------------------------------------------------------------------------------------------------------------------------------------------------------------------------------------------|-------------------------------------------------------------------------------------------------|

|           |           |         |              |          |                   |         |                                                                                                                                                                                                                                                                                                                          |           |                                                                           |         |      |                                                                                                                                                                                                                                       |                                                                                                                                                                                                                                                                                                                                                                                                                                                                                                                                                                                                                                                                 |                                                                                                                                                                                                                                                                                                                                                                                       |                                                                                                 |
|-----------|-----------|---------|--------------|----------|-------------------|---------|--------------------------------------------------------------------------------------------------------------------------------------------------------------------------------------------------------------------------------------------------------------------------------------------------------------------------|-----------|---------------------------------------------------------------------------|---------|------|---------------------------------------------------------------------------------------------------------------------------------------------------------------------------------------------------------------------------------------|-----------------------------------------------------------------------------------------------------------------------------------------------------------------------------------------------------------------------------------------------------------------------------------------------------------------------------------------------------------------------------------------------------------------------------------------------------------------------------------------------------------------------------------------------------------------------------------------------------------------------------------------------------------------|---------------------------------------------------------------------------------------------------------------------------------------------------------------------------------------------------------------------------------------------------------------------------------------------------------------------------------------------------------------------------------------|-------------------------------------------------------------------------------------------------|
| 201802_at | NM_004955 | SLC29A1 | Homo sapiens | 6-Oct-14 | Exemplar sequence | GenBank | gb:NM_004955.1 /DEF=Homo sapiens solute carrier family 29 (nucleoside transporters), member 1 (SLC29A1), mRNA. /FEA=mRNA /GEN=SLC29A1 /PROD=solute carrier family 29 (nucleoside transporters), member 1 /DB_XREF=gi:4826715 /UG=Hs.25450 solute carrier family 29 (nucleoside transporters), member 1 /FL=gb:BC001382.1 | NM_004955 | solute carrier family 29 (equilibrative nucleoside transporter), member 1 | SLC29A1 | 2030 | NM_001078174 ///<br>NM_001078175 ///<br>NM_001078176 ///<br>NM_001078177 ///<br>NM_004955 ///<br>XM_005248875 ///<br>XM_005248876 ///<br>XM_005248878 ///<br>XM_005248879 ///<br>XM_005248880 ///<br>XM_005248881 ///<br>XM_005248882 | 0006139 // nucleobase-containing compound metabolic process // traceable author statement /// 0006810 // transport // inferred from electronic annotation /// 0007595 // lactation // inferred from electronic annotation /// 0015858 // nucleoside transport // inferred from direct assay /// 0015862 // uridine transport // inferred from electronic annotation /// 0030431 // sleep // inferred from electronic annotation /// 0055085 // transmembrane transport // traceable author statement /// 0060079 // regulation of excitatory postsynaptic membrane potential // inferred from electronic annotation /// 0071333 // cellular response to glucose | 0005886 // plasma membrane // traceable author statement /// 0005887 // integral component of plasma membrane // traceable author statement /// 0016020 // membrane // traceable author statement /// 0016021 // integral component of membrane // inferred from electronic annotation /// 0016323 // basolateral plasma membrane // inferred from direct assay /// 0016324 // apical | 0005337 // nucleoside transmembrane transporter activity // inferred from electronic annotation |
|-----------|-----------|---------|--------------|----------|-------------------|---------|--------------------------------------------------------------------------------------------------------------------------------------------------------------------------------------------------------------------------------------------------------------------------------------------------------------------------|-----------|---------------------------------------------------------------------------|---------|------|---------------------------------------------------------------------------------------------------------------------------------------------------------------------------------------------------------------------------------------|-----------------------------------------------------------------------------------------------------------------------------------------------------------------------------------------------------------------------------------------------------------------------------------------------------------------------------------------------------------------------------------------------------------------------------------------------------------------------------------------------------------------------------------------------------------------------------------------------------------------------------------------------------------------|---------------------------------------------------------------------------------------------------------------------------------------------------------------------------------------------------------------------------------------------------------------------------------------------------------------------------------------------------------------------------------------|-------------------------------------------------------------------------------------------------|

|             |           |       |              |          |                   |         |                                                                                                                                                                                                                |           |                            |       |      |                                                                                                    |                                                                                                                                                                                                                                                                                                                                                                                                                                                                                                                                                              |                                                            |                                                                                                                                                                                                                                                                                                                                                                                                                                |
|-------------|-----------|-------|--------------|----------|-------------------|---------|----------------------------------------------------------------------------------------------------------------------------------------------------------------------------------------------------------------|-----------|----------------------------|-------|------|----------------------------------------------------------------------------------------------------|--------------------------------------------------------------------------------------------------------------------------------------------------------------------------------------------------------------------------------------------------------------------------------------------------------------------------------------------------------------------------------------------------------------------------------------------------------------------------------------------------------------------------------------------------------------|------------------------------------------------------------|--------------------------------------------------------------------------------------------------------------------------------------------------------------------------------------------------------------------------------------------------------------------------------------------------------------------------------------------------------------------------------------------------------------------------------|
| 201912_s_at | NM_002094 | GSPT1 | Homo sapiens | 6-Oct-14 | Exemplar sequence | GenBank | gb:NM_002094.1 /DEF=Homo sapiens G1 to S phase transition 1 (GSPT1), mRNA. /FEA=mRNA /GEN=GSPT1 /PROD=G1 to S phase transition 1 /DB_XREF=gi:4504166 /UG=Hs.2707 G1 to S phase transition 1 /FL=gb:NM_002094.1 | NM_002094 | G1 to S phase transition 1 | GSPT1 | 2935 | NM_001130006<br>///<br>NM_001130007<br>/// NM_002094<br>///<br>XM_005255274<br>///<br>XM_005255275 | 0000082 // G1/S transition of mitotic cell cycle // traceable author statement /// 0000184 // nuclear-transcribed mRNA catabolic process, nonsense-mediated decay // traceable author statement /// 0006184 // GTP catabolic process // inferred from electronic annotation /// 0006184 // GTP catabolic process // traceable author statement /// 0006412 // translation // inferred from electronic annotation /// 0006415 // translational termination // inferred from mutant phenotype /// 0006479 // protein methylation // inferred from direct assay | 0005622 // intracellular // non-traceable author statement | 0000166 // nucleotide binding // inferred from electronic annotation /// 0003747 // translation release factor activity // inferred from mutant phenotype /// 0003924 // GTPase activity // traceable author statement /// 0005515 // protein binding // inferred from physical interaction /// 0005525 // GTP binding // inferred from electronic annotation /// 0044822 // poly(A) RNA binding // inferred from direct assay |
|-------------|-----------|-------|--------------|----------|-------------------|---------|----------------------------------------------------------------------------------------------------------------------------------------------------------------------------------------------------------------|-----------|----------------------------|-------|------|----------------------------------------------------------------------------------------------------|--------------------------------------------------------------------------------------------------------------------------------------------------------------------------------------------------------------------------------------------------------------------------------------------------------------------------------------------------------------------------------------------------------------------------------------------------------------------------------------------------------------------------------------------------------------|------------------------------------------------------------|--------------------------------------------------------------------------------------------------------------------------------------------------------------------------------------------------------------------------------------------------------------------------------------------------------------------------------------------------------------------------------------------------------------------------------|



|           |          |       |              |          |                    |         |                                                                                                                                                                                                                             |          |                                            |       |     |                                                                             |                                                                                                                                                                                                                                                                                                               |                                                                                                                                                                                                                                                                                                                                                                                                                                                    |                                                                                                                                             |
|-----------|----------|-------|--------------|----------|--------------------|---------|-----------------------------------------------------------------------------------------------------------------------------------------------------------------------------------------------------------------------------|----------|--------------------------------------------|-------|-----|-----------------------------------------------------------------------------|---------------------------------------------------------------------------------------------------------------------------------------------------------------------------------------------------------------------------------------------------------------------------------------------------------------|----------------------------------------------------------------------------------------------------------------------------------------------------------------------------------------------------------------------------------------------------------------------------------------------------------------------------------------------------------------------------------------------------------------------------------------------------|---------------------------------------------------------------------------------------------------------------------------------------------|
| 201951_at | BF242905 | ALCAM | Homo sapiens | 6-Oct-14 | Consensus sequence | GenBank | Consensus includes<br>gb:BF242905<br>/FEA=EST<br>/DB_XREF=gj:1156833<br>/DB_XREF=est:601877949F1<br>/CLONE=IMAGE:4106028<br>/UG=Hs.10247<br>activated leucocyte cell adhesion molecule<br>/FL=gb:NM_001627.1<br>gb:L38608.1 | BF242905 | activated leucocyte cell adhesion molecule | ALCAM | 214 | NM_001243280<br>///<br>NM_001243281<br>///<br>NM_001243283<br>/// NM_001627 | 0007155 // cell adhesion<br>// inferred from electronic<br>annotation /// 0007165 //<br>signal transduction //<br>traceable author<br>statement /// 0007411 //<br>axon guidance // traceable<br>author statement ///<br>0008045 // motor neuron<br>axon guidance // inferred<br>from electronic<br>annotation | 0005576 // extracellular<br>region // inferred<br>from electronic<br>annotation ///<br>0009897 // external side of<br>plasma membrane<br>// inferred from<br>electronic<br>annotation ///<br>0016020 // membrane //<br>inferred from<br>electronic<br>annotation ///<br>0016021 // integral<br>component of<br>membrane //<br>inferred from<br>electronic<br>annotation ///<br>0030424 // axon //<br>inferred from<br>electronic<br>annotation /// | 0005102 // receptor binding<br>// traceable author statement<br>/// 0005515 // protein<br>binding // inferred from<br>electronic annotation |
|-----------|----------|-------|--------------|----------|--------------------|---------|-----------------------------------------------------------------------------------------------------------------------------------------------------------------------------------------------------------------------------|----------|--------------------------------------------|-------|-----|-----------------------------------------------------------------------------|---------------------------------------------------------------------------------------------------------------------------------------------------------------------------------------------------------------------------------------------------------------------------------------------------------------|----------------------------------------------------------------------------------------------------------------------------------------------------------------------------------------------------------------------------------------------------------------------------------------------------------------------------------------------------------------------------------------------------------------------------------------------------|---------------------------------------------------------------------------------------------------------------------------------------------|

|             |          |         |              |          |                    |         |                                                                                                                                                                                                                           |          |                                            |         |      |                                                                                                                                                  |                                                                                                                                                                                                                                                                              |                                                                                                                                                                                                                                                                                                                                                                                  |                                                                                                                                 |
|-------------|----------|---------|--------------|----------|--------------------|---------|---------------------------------------------------------------------------------------------------------------------------------------------------------------------------------------------------------------------------|----------|--------------------------------------------|---------|------|--------------------------------------------------------------------------------------------------------------------------------------------------|------------------------------------------------------------------------------------------------------------------------------------------------------------------------------------------------------------------------------------------------------------------------------|----------------------------------------------------------------------------------------------------------------------------------------------------------------------------------------------------------------------------------------------------------------------------------------------------------------------------------------------------------------------------------|---------------------------------------------------------------------------------------------------------------------------------|
| 201952_at   | AA156721 | ALCAM   | Homo sapiens | 6-Oct-14 | Consensus sequence | GenBank | Consensus includes<br>gb:AA156721<br>/FEA=EST<br>/DB_XREF=gi:1728335<br>/DB_XREF=est:z118b04.s1<br>/CLONE=IMAGE:502255<br>/UG=Hs.10247<br>activated leucocyte cell adhesion molecule<br>/FL=gb:NM_001627.1<br>gb:L38608.1 | AA156721 | activated leucocyte cell adhesion molecule | ALCAM   | 214  | NM_001243280<br>///<br>NM_001243281<br>///<br>NM_001243283<br>/// NM_001627                                                                      | 0007155 // cell adhesion // inferred from electronic annotation /// 0007165 // signal transduction // traceable author statement /// 0007411 // axon guidance // traceable author statement /// 0008045 // motor neuron axon guidance // inferred from electronic annotation | 0005576 // extracellular region // inferred from electronic annotation /// 0009897 // external side of plasma membrane // inferred from electronic annotation /// 0016020 // membrane // inferred from electronic annotation /// 0016021 // integral component of membrane // inferred from electronic annotation /// 0030424 // axon // inferred from electronic annotation /// | 0005102 // receptor binding // traceable author statement /// 0005515 // protein binding // inferred from electronic annotation |
| 202082_s_at | AV748469 | SEC14L1 | Homo sapiens | 6-Oct-14 | Consensus sequence | GenBank | Consensus includes<br>gb:AV748469<br>/FEA=EST<br>/DB_XREF=gi:10906317<br>/DB_XREF=est:AV748469<br>/CLONE=NPCAXA07<br>/UG=Hs.75232<br>SEC14 (S. cerevisiae)-like 1<br>/FL=gb:D67029.1<br>gb:NM_003003.1                    | AV748469 | SEC14-like 1 (S. cerevisiae)               | SEC14L1 | 6397 | NM_001039573<br>///<br>NM_001143998<br>///<br>NM_001143999<br>///<br>NM_001144001<br>///<br>NM_001204408<br>///<br>NM_001204410<br>/// NM_003003 | 0006810 // transport // inferred from electronic annotation                                                                                                                                                                                                                  | 0005794 // Golgi apparatus // traceable author statement /// 0016020 // membrane // traceable author statement /// 0016021 // integral component of membrane // inferred from electronic annotation                                                                                                                                                                              |                                                                                                                                 |

|             |           |         |              |          |                    |         |                                                                                                                                                                                                                                                               |           |                              |         |      |                                                                                                                                                     |                                                             |                                                                                                                                                                                                   |  |
|-------------|-----------|---------|--------------|----------|--------------------|---------|---------------------------------------------------------------------------------------------------------------------------------------------------------------------------------------------------------------------------------------------------------------|-----------|------------------------------|---------|------|-----------------------------------------------------------------------------------------------------------------------------------------------------|-------------------------------------------------------------|---------------------------------------------------------------------------------------------------------------------------------------------------------------------------------------------------|--|
| 202083_s_at | AI017770  | SEC14L1 | Homo sapiens | 6-Oct-14 | Consensus sequence | GenBank | Consensus includes<br>gb:AI017770<br>/FEA=EST<br>/DB_XREF=gj:3232106<br>/DB_XREF=est:ov32b12.x1<br>/CLONE=IMAGE:1639007<br>/UG=Hs.75232<br>SEC14 (S. cerevisiae)-like 1<br>/FL=gb:D67029.1<br>gb:NM_003003.1                                                  | AI017770  | SEC14-like 1 (S. cerevisiae) | SEC14L1 | 6397 | NM_001039573<br>///<br>NM_001143998<br>///<br>NM_001143999<br>///<br>NM_001144001<br>///<br>NM_001204408<br>///<br>NM_001204410<br>///<br>NM_003003 | 0006810 // transport // inferred from electronic annotation | 0005794 // Golgi apparatus // traceable author statement // 0016020 // membrane // traceable author statement // 0016021 // integral component of membrane // inferred from electronic annotation |  |
| 202084_s_at | NM_003003 | SEC14L1 | Homo sapiens | 6-Oct-14 | Exemplar sequence  | GenBank | gb:NM_003003.1 /DEF=Homo sapiens SEC14 (S. cerevisiae)-like 1 (SEC14L1), mRNA.<br>/FEA=mRNA<br>/GEN=SEC14L1<br>/PROD=SEC14 (S. cerevisiae)-like 1<br>/DB_XREF=gj:4506866<br>/UG=Hs.75232<br>SEC14 (S. cerevisiae)-like 1<br>/FL=gb:D67029.1<br>gb:NM_003003.1 | NM_003003 | SEC14-like 1 (S. cerevisiae) | SEC14L1 | 6397 | NM_001039573<br>///<br>NM_001143998<br>///<br>NM_001143999<br>///<br>NM_001144001<br>///<br>NM_001204408<br>///<br>NM_001204410<br>///<br>NM_003003 | 0006810 // transport // inferred from electronic annotation | 0005794 // Golgi apparatus // traceable author statement // 0016020 // membrane // traceable author statement // 0016021 // integral component of membrane // inferred from electronic annotation |  |

|             |          |       |              |          |                    |         |                                                                                                                                                                                                                                                     |          |                                        |       |       |                            |                                                                                                                                                                                                                                                                                                                                            |                                                                                                                                                                                                                                                                                                                                                                                 |                                                                                                                                                                                                                                                                                                 |
|-------------|----------|-------|--------------|----------|--------------------|---------|-----------------------------------------------------------------------------------------------------------------------------------------------------------------------------------------------------------------------------------------------------|----------|----------------------------------------|-------|-------|----------------------------|--------------------------------------------------------------------------------------------------------------------------------------------------------------------------------------------------------------------------------------------------------------------------------------------------------------------------------------------|---------------------------------------------------------------------------------------------------------------------------------------------------------------------------------------------------------------------------------------------------------------------------------------------------------------------------------------------------------------------------------|-------------------------------------------------------------------------------------------------------------------------------------------------------------------------------------------------------------------------------------------------------------------------------------------------|
| 202124_s_at | AV705253 | TRAK2 | Homo sapiens | 6-Oct-14 | Consensus sequence | GenBank | Consensus includes<br>gb:AV705253<br>/FEA=EST<br>/DB_XREF=gi:10722559<br>/DB_XREF=est:AV705253<br>/CLONE=ADBBQF03<br>/UG=Hs.154248 amyotrophic lateral sclerosis 2 (juvenile) chromosome region, candidate 3<br>/FL=gb:AB038951.1<br>gb:NM_015049.1 | AV705253 | trafficking protein, kinesin binding 2 | TRAK2 | 66008 | NM_015049 /// XM_006712714 | 0006357 // regulation of transcription from RNA polymerase II promoter // inferred from electronic annotation /// 0006493 // protein O-linked glycosylation // inferred from electronic annotation /// 0006605 // protein targeting // inferred from electronic annotation /// 0006810 // transport // inferred from electronic annotation | 0005634 // nucleus // inferred from electronic annotation /// 0005737 // cytoplasm // inferred from sequence or structural similarity /// 0005739 // mitochondrion // inferred from sequence or structural similarity /// 0005768 // endosome // inferred from electronic annotation /// 0005769 // early endosome // inferred from electronic annotation /// 0005886 // plasma | 0005102 // receptor binding // inferred from sequence or structural similarity /// 0005515 // protein binding // inferred from physical interaction /// 0019899 // enzyme binding // inferred from electronic annotation /// 0050811 // GABA receptor binding // non-traceable author statement |
|-------------|----------|-------|--------------|----------|--------------------|---------|-----------------------------------------------------------------------------------------------------------------------------------------------------------------------------------------------------------------------------------------------------|----------|----------------------------------------|-------|-------|----------------------------|--------------------------------------------------------------------------------------------------------------------------------------------------------------------------------------------------------------------------------------------------------------------------------------------------------------------------------------------|---------------------------------------------------------------------------------------------------------------------------------------------------------------------------------------------------------------------------------------------------------------------------------------------------------------------------------------------------------------------------------|-------------------------------------------------------------------------------------------------------------------------------------------------------------------------------------------------------------------------------------------------------------------------------------------------|

|             |           |       |              |          |                   |         |                                                                                                                                                                                                                                                                                                                                     |           |                                        |       |       |                            |                                                                                                                                                                                                                                                                                                                                            |                                                                                                                                                                                                                                                                                                                                                                                 |                                                                                                                                                                                                                                                                                                 |
|-------------|-----------|-------|--------------|----------|-------------------|---------|-------------------------------------------------------------------------------------------------------------------------------------------------------------------------------------------------------------------------------------------------------------------------------------------------------------------------------------|-----------|----------------------------------------|-------|-------|----------------------------|--------------------------------------------------------------------------------------------------------------------------------------------------------------------------------------------------------------------------------------------------------------------------------------------------------------------------------------------|---------------------------------------------------------------------------------------------------------------------------------------------------------------------------------------------------------------------------------------------------------------------------------------------------------------------------------------------------------------------------------|-------------------------------------------------------------------------------------------------------------------------------------------------------------------------------------------------------------------------------------------------------------------------------------------------|
| 202125_s_at | NM_015049 | TRAK2 | Homo sapiens | 6-Oct-14 | Exemplar sequence | GenBank | gb:NM_015049.1 /DEF=Homo sapiens amyotrophic lateral sclerosis 2 (juvenile) chromosome region, candidate 3 (ALS2CR3), mRNA. /FEA=mRNA /GEN=ALS2CR3 /PROD=amyotrophic lateral sclerosis 2 (juvenile) chromosome region, candidate 3 /DB_XREF=gi:13027379 /UG=Hs.154248 amyotrophic lateral sclerosis 2 (juvenile) chromosome region, | NM_015049 | trafficking protein, kinesin binding 2 | TRAK2 | 66008 | NM_015049 /// XM_006712714 | 0006357 // regulation of transcription from RNA polymerase II promoter // inferred from electronic annotation /// 0006493 // protein O-linked glycosylation // inferred from electronic annotation /// 0006605 // protein targeting // inferred from electronic annotation /// 0006810 // transport // inferred from electronic annotation | 0005634 // nucleus // inferred from electronic annotation /// 0005737 // cytoplasm // inferred from sequence or structural similarity /// 0005739 // mitochondrion // inferred from sequence or structural similarity /// 0005768 // endosome // inferred from electronic annotation /// 0005769 // early endosome // inferred from electronic annotation /// 0005886 // plasma | 0005102 // receptor binding // inferred from sequence or structural similarity /// 0005515 // protein binding // inferred from physical interaction /// 0019899 // enzyme binding // inferred from electronic annotation /// 0050811 // GABA receptor binding // non-traceable author statement |
|-------------|-----------|-------|--------------|----------|-------------------|---------|-------------------------------------------------------------------------------------------------------------------------------------------------------------------------------------------------------------------------------------------------------------------------------------------------------------------------------------|-----------|----------------------------------------|-------|-------|----------------------------|--------------------------------------------------------------------------------------------------------------------------------------------------------------------------------------------------------------------------------------------------------------------------------------------------------------------------------------------|---------------------------------------------------------------------------------------------------------------------------------------------------------------------------------------------------------------------------------------------------------------------------------------------------------------------------------------------------------------------------------|-------------------------------------------------------------------------------------------------------------------------------------------------------------------------------------------------------------------------------------------------------------------------------------------------|

|           |          |        |              |          |                    |         |                                                                                                                                                                                                                             |          |                                                         |        |      |                                                                                                    |                                                                                                                                                                                                                                                                                                                                                                                                                                                                                                                                                                                                                                           |  |                                                                                                                                                                                                                                                                    |
|-----------|----------|--------|--------------|----------|--------------------|---------|-----------------------------------------------------------------------------------------------------------------------------------------------------------------------------------------------------------------------------|----------|---------------------------------------------------------|--------|------|----------------------------------------------------------------------------------------------------|-------------------------------------------------------------------------------------------------------------------------------------------------------------------------------------------------------------------------------------------------------------------------------------------------------------------------------------------------------------------------------------------------------------------------------------------------------------------------------------------------------------------------------------------------------------------------------------------------------------------------------------------|--|--------------------------------------------------------------------------------------------------------------------------------------------------------------------------------------------------------------------------------------------------------------------|
| 202165_at | BF966540 | PPP1R2 | Homo sapiens | 6-Oct-14 | Consensus sequence | GenBank | Consensus includes<br>gb:BF966540<br>/FEA=EST<br>/DB_XREF=gi:12333755<br>/DB_XREF=est:602287009T1<br>/CLONE=IMAGE:4375586<br>/UG=Hs.267819<br>protein phosphatase 1, regulatory (inhibitor) subunit 2<br>/FL=gb:NM_006241.1 | BF966540 | protein phosphatase 1, regulatory (inhibitor) subunit 2 | PPP1R2 | 5504 | NM_001291504<br>///<br>NM_001291505<br>/// NM_006241<br>///<br>XM_006713682<br>///<br>XM_006713683 | 0005975 // carbohydrate metabolic process // inferred from electronic annotation /// 0005977 // glycogen metabolic process // inferred from electronic annotation /// 0006091 // generation of precursor metabolites and energy // traceable author statement /// 0009966 // regulation of signal transduction // inferred from electronic annotation /// 0043086 // negative regulation of catalytic activity // inferred from electronic annotation /// 0043086 // negative regulation of catalytic activity // traceable author statement /// 0043666 // regulation of phosphoprotein phosphatase activity // inferred from electronic |  | 0004864 // protein phosphatase inhibitor activity // inferred from electronic annotation /// 0004865 // protein serine/threonine phosphatase inhibitor activity // traceable author statement /// 0005515 // protein binding // inferred from physical interaction |
|-----------|----------|--------|--------------|----------|--------------------|---------|-----------------------------------------------------------------------------------------------------------------------------------------------------------------------------------------------------------------------------|----------|---------------------------------------------------------|--------|------|----------------------------------------------------------------------------------------------------|-------------------------------------------------------------------------------------------------------------------------------------------------------------------------------------------------------------------------------------------------------------------------------------------------------------------------------------------------------------------------------------------------------------------------------------------------------------------------------------------------------------------------------------------------------------------------------------------------------------------------------------------|--|--------------------------------------------------------------------------------------------------------------------------------------------------------------------------------------------------------------------------------------------------------------------|

|             |           |        |              |          |                   |         |                                                                                                                                                                                                                                                                                                           |           |                                                         |        |      |                                                                                           |                                                                                                                                                                                                                                                                                                                                                                                                                                                                                                                                                                                                                                           |  |                                                                                                                                                                                                                                                                    |
|-------------|-----------|--------|--------------|----------|-------------------|---------|-----------------------------------------------------------------------------------------------------------------------------------------------------------------------------------------------------------------------------------------------------------------------------------------------------------|-----------|---------------------------------------------------------|--------|------|-------------------------------------------------------------------------------------------|-------------------------------------------------------------------------------------------------------------------------------------------------------------------------------------------------------------------------------------------------------------------------------------------------------------------------------------------------------------------------------------------------------------------------------------------------------------------------------------------------------------------------------------------------------------------------------------------------------------------------------------------|--|--------------------------------------------------------------------------------------------------------------------------------------------------------------------------------------------------------------------------------------------------------------------|
| 202166_s_at | NM_006241 | PPP1R2 | Homo sapiens | 6-Oct-14 | Exemplar sequence | GenBank | gb:NM_006241.1 /DEF=Homo sapiens protein phosphatase 1, regulatory (inhibitor) subunit 2 (PPP1R2), mRNA. /FEA=mRNA /GEN=PPP1R2 /PROD=protein phosphatase 1, regulatory (inhibitor) subunit 2 /DB_XREF=gi:5453945 /UG=Hs.267819 protein phosphatase 1, regulatory (inhibitor) subunit 2 /FL=gb:NM_006241.1 | NM_006241 | protein phosphatase 1, regulatory (inhibitor) subunit 2 | PPP1R2 | 5504 | NM_001291504 ///<br>NM_001291505 ///<br>NM_006241 ///<br>XM_006713682 ///<br>XM_006713683 | 0005975 // carbohydrate metabolic process // inferred from electronic annotation /// 0005977 // glycogen metabolic process // inferred from electronic annotation /// 0006091 // generation of precursor metabolites and energy // traceable author statement /// 0009966 // regulation of signal transduction // inferred from electronic annotation /// 0043086 // negative regulation of catalytic activity // inferred from electronic annotation /// 0043086 // negative regulation of catalytic activity // traceable author statement /// 0043666 // regulation of phosphoprotein phosphatase activity // inferred from electronic |  | 0004864 // protein phosphatase inhibitor activity // inferred from electronic annotation /// 0004865 // protein serine/threonine phosphatase inhibitor activity // traceable author statement /// 0005515 // protein binding // inferred from physical interaction |
|-------------|-----------|--------|--------------|----------|-------------------|---------|-----------------------------------------------------------------------------------------------------------------------------------------------------------------------------------------------------------------------------------------------------------------------------------------------------------|-----------|---------------------------------------------------------|--------|------|-------------------------------------------------------------------------------------------|-------------------------------------------------------------------------------------------------------------------------------------------------------------------------------------------------------------------------------------------------------------------------------------------------------------------------------------------------------------------------------------------------------------------------------------------------------------------------------------------------------------------------------------------------------------------------------------------------------------------------------------------|--|--------------------------------------------------------------------------------------------------------------------------------------------------------------------------------------------------------------------------------------------------------------------|

|           |           |       |              |          |                   |         |                                                                                                                                                                                                                                                                                                                                                |           |                                |       |      |                                             |                                                                                                                                                                                                                                                                                                                                                                                                                                                                                                                                                                                                                            |                                                                                                                                                                                                                                                                                                                                                                                                                                                   |                                                                                                                                                                                                                                                                                                                                                                                                                                                                                                                                                                                                                                                                                                                                                                |
|-----------|-----------|-------|--------------|----------|-------------------|---------|------------------------------------------------------------------------------------------------------------------------------------------------------------------------------------------------------------------------------------------------------------------------------------------------------------------------------------------------|-----------|--------------------------------|-------|------|---------------------------------------------|----------------------------------------------------------------------------------------------------------------------------------------------------------------------------------------------------------------------------------------------------------------------------------------------------------------------------------------------------------------------------------------------------------------------------------------------------------------------------------------------------------------------------------------------------------------------------------------------------------------------------|---------------------------------------------------------------------------------------------------------------------------------------------------------------------------------------------------------------------------------------------------------------------------------------------------------------------------------------------------------------------------------------------------------------------------------------------------|----------------------------------------------------------------------------------------------------------------------------------------------------------------------------------------------------------------------------------------------------------------------------------------------------------------------------------------------------------------------------------------------------------------------------------------------------------------------------------------------------------------------------------------------------------------------------------------------------------------------------------------------------------------------------------------------------------------------------------------------------------------|
| 202182_at | NM_021078 | KAT2A | Homo sapiens | 6-Oct-14 | Exemplar sequence | GenBank | gb:NM_021078.1 /DEF=Homo sapiens GCN5 (general control of amino-acid synthesis, yeast, homolog)-like 2 (GCN5L2), mRNA. /FEA=mRNA /GEN=GCN5L2 /PROD=GCN5 (general control of amino-acid synthesis, yeast, homolog)-like 2 /DB_XREF=gi:10835100 /UG=Hs.101067 GCN5 (general control of amino-acid synthesis, yeast, homolog)-like 2 /FL=gb:NM_02 | NM_021078 | K(lysine) acetyltransferase 2A | KAT2A | 2648 | NM_021078 /// XM_006721817 /// XM_006721818 | 0001701 // in utero embryonic development // inferred from electronic annotation /// 0001756 // somitogenesis // inferred from electronic annotation /// 0001843 // neural tube closure // inferred from electronic annotation /// 0006325 // chromatin organization // traceable author statement /// 0006338 // chromatin remodeling // traceable author statement /// 0006351 // transcription, DNA-templated // inferred from electronic annotation /// 0006355 // regulation of transcription, DNA-templated // inferred from electronic annotation /// 0006357 // regulation of transcription from RNA polymerase II | 0000123 // histone acetyltransferase complex // inferred from electronic annotation /// 0005615 // extracellular space // inferred from direct assay /// 0005634 // direct assay /// 0005634 // nucleus // inferred from electronic annotation /// 0005654 // nucleoplasm // traceable author statement /// 0005671 // Ada2/Gcn5/Ada3 transcription activator complex // inferred from direct assay /// 0030914 // STAGA complex // inferred from | 0003682 // chromatin binding // inferred from electronic annotation /// 0003713 // transcription coactivator activity // inferred from direct assay /// 0004402 // histone acetyltransferase activity // inferred from direct assay /// 0005515 // protein binding // inferred from physical interaction /// 0008080 // N-acetyltransferase activity // inferred from electronic annotation /// 0010484 // H3 histone acetyltransferase activity // inferred from direct assay /// 0016740 // transferase activity // inferred from electronic annotation /// 0016746 // transferase activity, transferring acyl groups // inferred from electronic annotation /// 0042826 // histone deacetylase binding // inferred from physical interaction /// 0043997 // |
|-----------|-----------|-------|--------------|----------|-------------------|---------|------------------------------------------------------------------------------------------------------------------------------------------------------------------------------------------------------------------------------------------------------------------------------------------------------------------------------------------------|-----------|--------------------------------|-------|------|---------------------------------------------|----------------------------------------------------------------------------------------------------------------------------------------------------------------------------------------------------------------------------------------------------------------------------------------------------------------------------------------------------------------------------------------------------------------------------------------------------------------------------------------------------------------------------------------------------------------------------------------------------------------------------|---------------------------------------------------------------------------------------------------------------------------------------------------------------------------------------------------------------------------------------------------------------------------------------------------------------------------------------------------------------------------------------------------------------------------------------------------|----------------------------------------------------------------------------------------------------------------------------------------------------------------------------------------------------------------------------------------------------------------------------------------------------------------------------------------------------------------------------------------------------------------------------------------------------------------------------------------------------------------------------------------------------------------------------------------------------------------------------------------------------------------------------------------------------------------------------------------------------------------|



|           |           |       |              |          |                   |         |                                                                                                                                                                                                                                                                                     |           |                         |       |       |                                                                                        |                                                                                                                                                                                                                                                                                                                                                                                                                                                                                                                                                                                                                                        |                                                                                                         |                                                                                                                                                                                                                                                                                                                                                                                                                                                                                                                                                                                                                                                                                                                                         |
|-----------|-----------|-------|--------------|----------|-------------------|---------|-------------------------------------------------------------------------------------------------------------------------------------------------------------------------------------------------------------------------------------------------------------------------------------|-----------|-------------------------|-------|-------|----------------------------------------------------------------------------------------|----------------------------------------------------------------------------------------------------------------------------------------------------------------------------------------------------------------------------------------------------------------------------------------------------------------------------------------------------------------------------------------------------------------------------------------------------------------------------------------------------------------------------------------------------------------------------------------------------------------------------------------|---------------------------------------------------------------------------------------------------------|-----------------------------------------------------------------------------------------------------------------------------------------------------------------------------------------------------------------------------------------------------------------------------------------------------------------------------------------------------------------------------------------------------------------------------------------------------------------------------------------------------------------------------------------------------------------------------------------------------------------------------------------------------------------------------------------------------------------------------------------|
| 202241_at | NM_025195 | TRIB1 | Homo sapiens | 6-Oct-14 | Exemplar sequence | GenBank | gb:NM_025195.1 /DEF=Homo sapiens phosphoprotein regulated by mitogenic pathways (C8FW), mRNA. /FEA=mRNA /GEN=C8FW /PROD=G-protein-coupled receptor induced protein /DB_XREF=gi:13399327 /UG=Hs.7837 phosphoprotein regulated by mitogenic pathways /FL=gb:AF205437.1 gb:NM_025195.1 | NM_025195 | tribbles pseudokinase 1 | TRIB1 | 10221 | NM_001282985<br>/// NM_025195<br>/// XM_006716496<br>/// XM_006716497<br>/// XR_428373 | 0006468 // protein phosphorylation // traceable author statement /// 0006469 // negative regulation of protein kinase activity // inferred from mutant phenotype /// 0007254 // JNK cascade // inferred from mutant phenotype /// 0014912 // negative regulation of smooth muscle cell migration // inferred from mutant phenotype /// 0031665 // negative regulation of lipopolysaccharide-mediated signaling pathway // inferred from mutant phenotype /// 0032436 // positive regulation of proteasomal ubiquitin-dependent protein catabolic process // inferred from sequence or structural similarity /// 0032496 // response to | 0005634 // nucleus // inferred from direct assay /// 0005737 // cytoplasm // inferred from direct assay | 0004672 // protein kinase activity // traceable author statement /// 0004860 // protein kinase inhibitor activity // inferred from mutant phenotype /// 0005524 // ATP binding // traceable author statement /// 0008134 // transcription factor binding // inferred from physical interaction /// 0016772 // transferase activity, transferring phosphorus-containing groups // inferred from electronic annotation /// 0031434 // mitogen-activated protein kinase kinase binding // inferred from direct assay /// 0031625 // ubiquitin protein ligase binding // inferred from sequence or structural similarity /// 0055106 // ubiquitin-protein transferase regulator activity // inferred from sequence or structural similarity |
|-----------|-----------|-------|--------------|----------|-------------------|---------|-------------------------------------------------------------------------------------------------------------------------------------------------------------------------------------------------------------------------------------------------------------------------------------|-----------|-------------------------|-------|-------|----------------------------------------------------------------------------------------|----------------------------------------------------------------------------------------------------------------------------------------------------------------------------------------------------------------------------------------------------------------------------------------------------------------------------------------------------------------------------------------------------------------------------------------------------------------------------------------------------------------------------------------------------------------------------------------------------------------------------------------|---------------------------------------------------------------------------------------------------------|-----------------------------------------------------------------------------------------------------------------------------------------------------------------------------------------------------------------------------------------------------------------------------------------------------------------------------------------------------------------------------------------------------------------------------------------------------------------------------------------------------------------------------------------------------------------------------------------------------------------------------------------------------------------------------------------------------------------------------------------|

|           |           |      |              |          |                   |         |                                                                                                                                                                                                                                                                                                           |           |                                   |      |      |                                                              |                                                                                                                                                                                                                                                                                                                                                                                                                                                                                                                                                                                                                        |                                                                                                                                                                                                                                                                                                                                                                                                                               |                                                                                                                                                                                                                                                                                                                                                                                                                                                                                                                                                                                                                                                                                              |
|-----------|-----------|------|--------------|----------|-------------------|---------|-----------------------------------------------------------------------------------------------------------------------------------------------------------------------------------------------------------------------------------------------------------------------------------------------------------|-----------|-----------------------------------|------|------|--------------------------------------------------------------|------------------------------------------------------------------------------------------------------------------------------------------------------------------------------------------------------------------------------------------------------------------------------------------------------------------------------------------------------------------------------------------------------------------------------------------------------------------------------------------------------------------------------------------------------------------------------------------------------------------------|-------------------------------------------------------------------------------------------------------------------------------------------------------------------------------------------------------------------------------------------------------------------------------------------------------------------------------------------------------------------------------------------------------------------------------|----------------------------------------------------------------------------------------------------------------------------------------------------------------------------------------------------------------------------------------------------------------------------------------------------------------------------------------------------------------------------------------------------------------------------------------------------------------------------------------------------------------------------------------------------------------------------------------------------------------------------------------------------------------------------------------------|
| 202275_at | NM_000402 | G6PD | Homo sapiens | 6-Oct-14 | Exemplar sequence | GenBank | gb:NM_000402.1 /DEF=Homo sapiens glucose-6-phosphate dehydrogenase (G6PD), nuclear gene encoding mitochondrial protein, mRNA. /FEA=mRNA /GEN=G6PD /PROD=glucose-6-phosphate dehydrogenase /DB_XREF=gj:4503844 /UG=Hs.80206 glucose-6-phosphate dehydrogenase /FL=gb:BC000337.1 gb:M21248.1 gb:NM_000402.1 | NM_000402 | glucose-6-phosphate dehydrogenase | G6PD | 2539 | NM_000402 /// NM_001042351 /// XM_005274657 /// XM_005274658 | 0001816 // cytokine production // inferred from mutant phenotype /// 0005975 // carbohydrate metabolic process // traceable author statement /// 0006006 // glucose metabolic process // inferred from electronic annotation /// 0006098 // pentose-phosphate shunt // inferred from direct assay /// 0006098 // pentose-phosphate shunt // traceable author statement /// 0006629 // lipid metabolic process // traceable author statement /// 0006695 // cholesterol biosynthetic process // inferred from mutant phenotype /// 0006739 // NADP metabolic process // inferred from direct assay /// 0006740 // NADPH | 0005634 // nucleus // inferred from electronic annotation /// 0005737 // cytoplasm // inferred from direct assay /// 0005813 // centrosome // inferred from direct assay /// 0005829 // cytosol // inferred from direct assay /// 0005829 // cytosol // traceable author statement /// 0009898 // cytoplasmic side of plasma membrane // inferred from direct assay /// 0016020 // membrane // inferred from direct assay /// | 0004345 // glucose-6-phosphate dehydrogenase activity // inferred from direct assay /// 0004345 // glucose-6-phosphate dehydrogenase activity // inferred from mutant phenotype /// 0005515 // protein binding // inferred from physical interaction /// 0005536 // glucose binding // inferred from direct assay /// 0005536 // glucose binding // inferred from mutant phenotype /// 0016491 // oxidoreductase activity // inferred from electronic annotation /// 0030246 // carbohydrate binding // inferred from electronic annotation /// 0042803 // protein homodimerization activity // inferred from physical interaction /// 0050661 // NADP binding // inferred from direct assay |
|-----------|-----------|------|--------------|----------|-------------------|---------|-----------------------------------------------------------------------------------------------------------------------------------------------------------------------------------------------------------------------------------------------------------------------------------------------------------|-----------|-----------------------------------|------|------|--------------------------------------------------------------|------------------------------------------------------------------------------------------------------------------------------------------------------------------------------------------------------------------------------------------------------------------------------------------------------------------------------------------------------------------------------------------------------------------------------------------------------------------------------------------------------------------------------------------------------------------------------------------------------------------------|-------------------------------------------------------------------------------------------------------------------------------------------------------------------------------------------------------------------------------------------------------------------------------------------------------------------------------------------------------------------------------------------------------------------------------|----------------------------------------------------------------------------------------------------------------------------------------------------------------------------------------------------------------------------------------------------------------------------------------------------------------------------------------------------------------------------------------------------------------------------------------------------------------------------------------------------------------------------------------------------------------------------------------------------------------------------------------------------------------------------------------------|

|             |          |       |              |          |                    |         |                                                                                                                                                                                                                  |          |                                                                                                   |                              |                        |                                                                                                                       |                                                                                                                                                                                                                                                                                                                                                                                                                                                                        |                                                                                                                                                                                                                                                                                                                                                                                           |                                                                                                                                                                                                                                                                                                                                                                                                                                                                                                                                  |
|-------------|----------|-------|--------------|----------|--------------------|---------|------------------------------------------------------------------------------------------------------------------------------------------------------------------------------------------------------------------|----------|---------------------------------------------------------------------------------------------------|------------------------------|------------------------|-----------------------------------------------------------------------------------------------------------------------|------------------------------------------------------------------------------------------------------------------------------------------------------------------------------------------------------------------------------------------------------------------------------------------------------------------------------------------------------------------------------------------------------------------------------------------------------------------------|-------------------------------------------------------------------------------------------------------------------------------------------------------------------------------------------------------------------------------------------------------------------------------------------------------------------------------------------------------------------------------------------|----------------------------------------------------------------------------------------------------------------------------------------------------------------------------------------------------------------------------------------------------------------------------------------------------------------------------------------------------------------------------------------------------------------------------------------------------------------------------------------------------------------------------------|
| 202551_s_at | BG546884 | CRIM1 | Homo sapiens | 6-Oct-14 | Consensus sequence | GenBank | Consensus includes<br>gb:BG546884<br>/FEA=EST<br>/DB_XREF=gj:13545549<br>/DB_XREF=est:602574066F1<br>/CLONE=IMAGE:4702049<br>/UG=Hs.19280<br>cysteine-rich motor neuron 1<br>/FL=gb:NM_016441.1<br>gb:AF167706.1 | BG546884 | cysteine rich transmembrane BMP regulator 1 (chordin-like)<br>/// uncharacterized<br>LOC101929500 | CRIM1<br>///<br>LOC101929500 | 51232 ///<br>101929500 | NM_016441 ///<br>XM_005264357 ///<br>XM_005264358 ///<br>XR_244983 ///<br>XR_249109 ///<br>XR_251054 ///<br>XR_426983 | 0001558 // regulation of cell growth // inferred from electronic annotation ///<br>0007399 // nervous system development // traceable author statement ///<br>0010951 // negative regulation of endopeptidase activity // inferred from electronic annotation ///<br>0043086 // negative regulation of catalytic activity // inferred from electronic annotation ///<br>0048009 // insulin-like growth factor receptor signaling pathway // traceable author statement | 0005576 // extracellular region // inferred from electronic annotation ///<br>0005886 // plasma membrane // inferred from electronic annotation ///<br>0016020 // membrane // inferred from electronic annotation ///<br>0016021 // integral component of membrane // inferred from electronic annotation ///<br>0070062 // extracellular vesicular exosome // inferred from direct assay | 0004857 // enzyme inhibitor activity // inferred from electronic annotation ///<br>0004867 // serine-type endopeptidase inhibitor activity // inferred from electronic annotation ///<br>0005010 // insulin-like growth factor-activated receptor activity // traceable author statement ///<br>0005515 // protein binding // inferred from electronic annotation ///<br>0005520 // insulin-like growth factor binding // inferred from electronic annotation ///<br>0030165 // PDZ domain binding // inferred from direct assay |
|-------------|----------|-------|--------------|----------|--------------------|---------|------------------------------------------------------------------------------------------------------------------------------------------------------------------------------------------------------------------|----------|---------------------------------------------------------------------------------------------------|------------------------------|------------------------|-----------------------------------------------------------------------------------------------------------------------|------------------------------------------------------------------------------------------------------------------------------------------------------------------------------------------------------------------------------------------------------------------------------------------------------------------------------------------------------------------------------------------------------------------------------------------------------------------------|-------------------------------------------------------------------------------------------------------------------------------------------------------------------------------------------------------------------------------------------------------------------------------------------------------------------------------------------------------------------------------------------|----------------------------------------------------------------------------------------------------------------------------------------------------------------------------------------------------------------------------------------------------------------------------------------------------------------------------------------------------------------------------------------------------------------------------------------------------------------------------------------------------------------------------------|

|             |           |       |              |          |                   |         |                                                                                                                                                                                                                                      |           |                                                                                         |                    |                    |                                                                                               |                                                                                                                                                                                                                                                                                                                                                                                                                                                        |                                                                                                                                                                                                                                                                                                                                                                           |                                                                                                                                                                                                                                                                                                                                                                                                                                                                                                              |
|-------------|-----------|-------|--------------|----------|-------------------|---------|--------------------------------------------------------------------------------------------------------------------------------------------------------------------------------------------------------------------------------------|-----------|-----------------------------------------------------------------------------------------|--------------------|--------------------|-----------------------------------------------------------------------------------------------|--------------------------------------------------------------------------------------------------------------------------------------------------------------------------------------------------------------------------------------------------------------------------------------------------------------------------------------------------------------------------------------------------------------------------------------------------------|---------------------------------------------------------------------------------------------------------------------------------------------------------------------------------------------------------------------------------------------------------------------------------------------------------------------------------------------------------------------------|--------------------------------------------------------------------------------------------------------------------------------------------------------------------------------------------------------------------------------------------------------------------------------------------------------------------------------------------------------------------------------------------------------------------------------------------------------------------------------------------------------------|
| 202552_s_at | NM_016441 | CRIM1 | Homo sapiens | 6-Oct-14 | Exemplar sequence | GenBank | gb:NM_016441.1 /DEF=Homo sapiens cysteine-rich motor neuron 1 (CRIM1), mRNA. /FEA=mRNA /GEN=CRIM1 /PROD=cysteine-rich motor neuron 1 /DB_XREF=gi:10092638 /UG=Hs.19280 cysteine-rich motor neuron 1 /FL=gb:NM_016441.1 gb:AF167706.1 | NM_016441 | cysteine rich transmembrane BMP regulator 1 (chordin-like) uncharacterized LOC101929500 | CRIM1 LOC101929500 | 51232 // 101929500 | NM_016441 // XM_005264357 // XM_005264358 // XR_244983 // XR_249109 // XR_251054 // XR_426983 | 0001558 // regulation of cell growth // inferred from electronic annotation // 0007399 // nervous system development // traceable author statement // 0010951 // negative regulation of endopeptidase activity // inferred from electronic annotation // 0043086 // negative regulation of catalytic activity // inferred from electronic annotation // 0048009 // insulin-like growth factor receptor signaling pathway // traceable author statement | 0005576 // extracellular region // inferred from electronic annotation // 0005886 // plasma membrane // inferred from electronic annotation // 0016020 // membrane // inferred from electronic annotation // 0016021 // integral component of membrane // inferred from electronic annotation // 0070062 // extracellular vesicular exosome // inferred from direct assay | 0004857 // enzyme inhibitor activity // inferred from electronic annotation // 0004867 // serine-type endopeptidase inhibitor activity // inferred from electronic annotation // 0005010 // insulin-like growth factor-activated receptor activity // traceable author statement // 0005515 // protein binding // inferred from electronic annotation // 0005520 // insulin-like growth factor binding // inferred from electronic annotation // 0030165 // PDZ domain binding // inferred from direct assay |
|-------------|-----------|-------|--------------|----------|-------------------|---------|--------------------------------------------------------------------------------------------------------------------------------------------------------------------------------------------------------------------------------------|-----------|-----------------------------------------------------------------------------------------|--------------------|--------------------|-----------------------------------------------------------------------------------------------|--------------------------------------------------------------------------------------------------------------------------------------------------------------------------------------------------------------------------------------------------------------------------------------------------------------------------------------------------------------------------------------------------------------------------------------------------------|---------------------------------------------------------------------------------------------------------------------------------------------------------------------------------------------------------------------------------------------------------------------------------------------------------------------------------------------------------------------------|--------------------------------------------------------------------------------------------------------------------------------------------------------------------------------------------------------------------------------------------------------------------------------------------------------------------------------------------------------------------------------------------------------------------------------------------------------------------------------------------------------------|

|           |          |         |              |          |                    |         |                                                                                                                                                                                        |          |                          |         |      |                                                                                                              |                                                                                                                                                                                                                                                                                                                                                                                                                                                                                                                                                                                                                     |                                                                                                                                                               |                                                                                                                                                                                                                                                                                                                                                                                                                                                                                                                                                                                                                                                                                                                    |
|-----------|----------|---------|--------------|----------|--------------------|---------|----------------------------------------------------------------------------------------------------------------------------------------------------------------------------------------|----------|--------------------------|---------|------|--------------------------------------------------------------------------------------------------------------|---------------------------------------------------------------------------------------------------------------------------------------------------------------------------------------------------------------------------------------------------------------------------------------------------------------------------------------------------------------------------------------------------------------------------------------------------------------------------------------------------------------------------------------------------------------------------------------------------------------------|---------------------------------------------------------------------------------------------------------------------------------------------------------------|--------------------------------------------------------------------------------------------------------------------------------------------------------------------------------------------------------------------------------------------------------------------------------------------------------------------------------------------------------------------------------------------------------------------------------------------------------------------------------------------------------------------------------------------------------------------------------------------------------------------------------------------------------------------------------------------------------------------|
| 202573_at | AL530441 | CSNK1G2 | Homo sapiens | 6-Oct-14 | Consensus sequence | GenBank | Consensus includes gb:AL530441 /FEA=EST /DB_XREF=gi:12793934 /DB_XREF=est:AL530441 /CLONE=CS0DD007YK14 (3 prime) /UG=Hs.181390 casein kinase 1, gamma 2 /FL=gb:NM_001319.2 gb:U89896.1 | AL530441 | casein kinase 1, gamma 2 | CSNK1G2 | 1455 | NM_001319 /// XM_005259498 /// XM_005259499 /// XM_005259500 /// XM_005259501 /// XM_005259502 /// XR_430129 | 0006468 // protein phosphorylation // traceable author statement /// 0006665 // sphingolipid metabolic process // traceable author statement /// 0007165 // signal transduction // traceable author statement /// 0008152 // metabolic process // inferred from electronic annotation /// 0016055 // Wnt signaling pathway // inferred from electronic annotation /// 0016310 // phosphorylation // inferred from electronic annotation /// 0030148 // sphingolipid biosynthetic process // traceable author statement /// 0044281 // small molecule metabolic process // traceable author statement /// 0046777 // | 0005737 // cytoplasm // inferred from direct assay /// 0005829 // cytosol // traceable author statement /// 0016020 // membrane // inferred from direct assay | 0000166 // nucleotide binding // inferred from electronic annotation /// 0000287 // magnesium ion binding // inferred from electronic annotation /// 0001948 // glycoprotein binding // inferred from electronic annotation /// 0004672 // protein kinase activity // inferred from electronic annotation /// 0004674 // protein serine/threonine kinase activity // traceable author statement /// 0004713 // protein tyrosine kinase activity // inferred from electronic annotation /// 0005515 // protein binding // inferred from physical interaction /// 0005524 // ATP binding // inferred from electronic annotation /// 0016301 // kinase activity // inferred from electronic annotation /// 0016740 // |
|-----------|----------|---------|--------------|----------|--------------------|---------|----------------------------------------------------------------------------------------------------------------------------------------------------------------------------------------|----------|--------------------------|---------|------|--------------------------------------------------------------------------------------------------------------|---------------------------------------------------------------------------------------------------------------------------------------------------------------------------------------------------------------------------------------------------------------------------------------------------------------------------------------------------------------------------------------------------------------------------------------------------------------------------------------------------------------------------------------------------------------------------------------------------------------------|---------------------------------------------------------------------------------------------------------------------------------------------------------------|--------------------------------------------------------------------------------------------------------------------------------------------------------------------------------------------------------------------------------------------------------------------------------------------------------------------------------------------------------------------------------------------------------------------------------------------------------------------------------------------------------------------------------------------------------------------------------------------------------------------------------------------------------------------------------------------------------------------|

|             |           |         |              |          |                   |         |                                                                                                                                                                                                                            |           |                          |         |      |                                                                                                              |                                                                                                                                                                                                                                                                                                                                                                                                                                                                                                                                                                                                                     |                                                                                                                                                               |                                                                                                                                                                                                                                                                                                                                                                                                                                                                                                                                                                                                                                                                                                                    |
|-------------|-----------|---------|--------------|----------|-------------------|---------|----------------------------------------------------------------------------------------------------------------------------------------------------------------------------------------------------------------------------|-----------|--------------------------|---------|------|--------------------------------------------------------------------------------------------------------------|---------------------------------------------------------------------------------------------------------------------------------------------------------------------------------------------------------------------------------------------------------------------------------------------------------------------------------------------------------------------------------------------------------------------------------------------------------------------------------------------------------------------------------------------------------------------------------------------------------------------|---------------------------------------------------------------------------------------------------------------------------------------------------------------|--------------------------------------------------------------------------------------------------------------------------------------------------------------------------------------------------------------------------------------------------------------------------------------------------------------------------------------------------------------------------------------------------------------------------------------------------------------------------------------------------------------------------------------------------------------------------------------------------------------------------------------------------------------------------------------------------------------------|
| 202574_s_at | NM_001319 | CSNK1G2 | Homo sapiens | 6-Oct-14 | Exemplar sequence | GenBank | gb:NM_001319.2 /DEF=Homo sapiens casein kinase 1, gamma 2 (CSNK1G2), mRNA. /FEA=mRNA /GEN=CSNK1G2 /PROD=casein kinase 1, gamma 2 /DB_XREF=gi:1079647 /UG=Hs.181390 casein kinase 1, gamma 2 /FL=gb:NM_001319.2 gb:U89896.1 | NM_001319 | casein kinase 1, gamma 2 | CSNK1G2 | 1455 | NM_001319 /// XM_005259498 /// XM_005259499 /// XM_005259500 /// XM_005259501 /// XM_005259502 /// XR_430129 | 0006468 // protein phosphorylation // traceable author statement /// 0006665 // sphingolipid metabolic process // traceable author statement /// 0007165 // signal transduction // traceable author statement /// 0008152 // metabolic process // inferred from electronic annotation /// 0016055 // Wnt signaling pathway // inferred from electronic annotation /// 0016310 // phosphorylation // inferred from electronic annotation /// 0030148 // sphingolipid biosynthetic process // traceable author statement /// 0044281 // small molecule metabolic process // traceable author statement /// 0046777 // | 0005737 // cytoplasm // inferred from direct assay /// 0005829 // cytosol // traceable author statement /// 0016020 // membrane // inferred from direct assay | 0000166 // nucleotide binding // inferred from electronic annotation /// 0000287 // magnesium ion binding // inferred from electronic annotation /// 0001948 // glycoprotein binding // inferred from electronic annotation /// 0004672 // protein kinase activity // inferred from electronic annotation /// 0004674 // protein serine/threonine kinase activity // traceable author statement /// 0004713 // protein tyrosine kinase activity // inferred from electronic annotation /// 0005515 // protein binding // inferred from physical interaction /// 0005524 // ATP binding // inferred from electronic annotation /// 0016301 // kinase activity // inferred from electronic annotation /// 0016740 // |
|-------------|-----------|---------|--------------|----------|-------------------|---------|----------------------------------------------------------------------------------------------------------------------------------------------------------------------------------------------------------------------------|-----------|--------------------------|---------|------|--------------------------------------------------------------------------------------------------------------|---------------------------------------------------------------------------------------------------------------------------------------------------------------------------------------------------------------------------------------------------------------------------------------------------------------------------------------------------------------------------------------------------------------------------------------------------------------------------------------------------------------------------------------------------------------------------------------------------------------------|---------------------------------------------------------------------------------------------------------------------------------------------------------------|--------------------------------------------------------------------------------------------------------------------------------------------------------------------------------------------------------------------------------------------------------------------------------------------------------------------------------------------------------------------------------------------------------------------------------------------------------------------------------------------------------------------------------------------------------------------------------------------------------------------------------------------------------------------------------------------------------------------|

|             |           |       |              |          |                   |         |                                                                                                                                                                                                                    |           |                                   |       |       |           |                                                                                                                                                                                                                                                                                                                                                                                                                                                                                                                                                                                                                                   |                                                                                                                                                                                                                                                 |                                                                          |
|-------------|-----------|-------|--------------|----------|-------------------|---------|--------------------------------------------------------------------------------------------------------------------------------------------------------------------------------------------------------------------|-----------|-----------------------------------|-------|-------|-----------|-----------------------------------------------------------------------------------------------------------------------------------------------------------------------------------------------------------------------------------------------------------------------------------------------------------------------------------------------------------------------------------------------------------------------------------------------------------------------------------------------------------------------------------------------------------------------------------------------------------------------------------|-------------------------------------------------------------------------------------------------------------------------------------------------------------------------------------------------------------------------------------------------|--------------------------------------------------------------------------|
| 202887_s_at | NM_019058 | DDIT4 | Homo sapiens | 6-Oct-14 | Exemplar sequence | GenBank | gb:NM_019058.1 /DEF=Homo sapiens hypothetical protein (FLJ20500), mRNA. /FEA=mRNA /GEN=FLJ20500 /PROD=hypothetical protein /DB_XREF=gi:9506686 /UG=Hs.111244 hypothetical protein /FL=gb:AL136668.1 gb:NM_019058.1 | NM_019058 | DNA-damage-inducible transcript 4 | DDIT4 | 54541 | NM_019058 | 0001666 // response to hypoxia // inferred from direct assay /// 0001764 // neuron migration // inferred from sequence or structural similarity /// 0006915 // apoptotic process // inferred from electronic annotation /// 0007420 // brain development // inferred from sequence or structural similarity /// 0008283 // cell proliferation // inferred from sequence or structural similarity /// 0009968 // negative regulation of signal transduction // inferred from electronic annotation /// 0010801 // negative regulation of peptidyl-threonine phosphorylation // inferred from sequence or structural similarity /// | 0005622 // intracellular // inferred from direct assay /// 0005737 // cytoplasm // inferred from direct assay /// 0005739 // mitochondrion // inferred from electronic annotation /// 0005829 // cytosol // inferred from electronic annotation | 0071889 // 14-3-3 protein binding // inferred from electronic annotation |
|-------------|-----------|-------|--------------|----------|-------------------|---------|--------------------------------------------------------------------------------------------------------------------------------------------------------------------------------------------------------------------|-----------|-----------------------------------|-------|-------|-----------|-----------------------------------------------------------------------------------------------------------------------------------------------------------------------------------------------------------------------------------------------------------------------------------------------------------------------------------------------------------------------------------------------------------------------------------------------------------------------------------------------------------------------------------------------------------------------------------------------------------------------------------|-------------------------------------------------------------------------------------------------------------------------------------------------------------------------------------------------------------------------------------------------|--------------------------------------------------------------------------|

|             |           |      |              |          |                   |         |                                                                                                                                                                                                                                                                                               |           |                                     |      |      |                                                                                              |  |                                                                                                                                                                                                                                                                                                                                                                                                  |                                                                  |
|-------------|-----------|------|--------------|----------|-------------------|---------|-----------------------------------------------------------------------------------------------------------------------------------------------------------------------------------------------------------------------------------------------------------------------------------------------|-----------|-------------------------------------|------|------|----------------------------------------------------------------------------------------------|--|--------------------------------------------------------------------------------------------------------------------------------------------------------------------------------------------------------------------------------------------------------------------------------------------------------------------------------------------------------------------------------------------------|------------------------------------------------------------------|
| 202947_s_at | NM_002101 | GYPC | Homo sapiens | 6-Oct-14 | Exemplar sequence | GenBank | gb:NM_002101.2 /DEF=Homo sapiens glycophorin C (Gerbich blood group) (GYPC), transcript variant 1, mRNA.<br>/FEA=mRNA<br>/GEN=GYPC<br>/PROD=glycophorin C, isoform 1<br>/DB_XREF=gi:8051606<br>/UG=Hs.81994 glycophorin C (Gerbich blood group)<br>/FL=gb:M36284.1 gb:M11802.1 gb:NM_002101.2 | NM_002101 | glycophorin C (Gerbich blood group) | GYPC | 2995 | NM_001256584<br>/// NM_002101<br>/// NM_016815<br>///<br>XM_005263653<br>///<br>XM_006712460 |  | 0005886 // plasma membrane // non-traceable author statement ///<br>0005887 // integral component of plasma membrane // traceable author statement ///<br>0016020 // membrane // inferred from direct assay ///<br>0016020 // membrane // inferred from electronic annotation ///<br>0016021 // integral component of membrane // inferred from electronic annotation ///<br>0030863 // cortical | 0005515 // protein binding // inferred from physical interaction |
|-------------|-----------|------|--------------|----------|-------------------|---------|-----------------------------------------------------------------------------------------------------------------------------------------------------------------------------------------------------------------------------------------------------------------------------------------------|-----------|-------------------------------------|------|------|----------------------------------------------------------------------------------------------|--|--------------------------------------------------------------------------------------------------------------------------------------------------------------------------------------------------------------------------------------------------------------------------------------------------------------------------------------------------------------------------------------------------|------------------------------------------------------------------|



|             |           |      |              |          |                   |         |                                                                                                                                                                                                                                          |           |                                    |      |      |           |                                                                                                                                                                                                                                                                                                                                                                                                                                                                                                                                                                                                                  |                                                                                     |                                                                                                                      |
|-------------|-----------|------|--------------|----------|-------------------|---------|------------------------------------------------------------------------------------------------------------------------------------------------------------------------------------------------------------------------------------------|-----------|------------------------------------|------|------|-----------|------------------------------------------------------------------------------------------------------------------------------------------------------------------------------------------------------------------------------------------------------------------------------------------------------------------------------------------------------------------------------------------------------------------------------------------------------------------------------------------------------------------------------------------------------------------------------------------------------------------|-------------------------------------------------------------------------------------|----------------------------------------------------------------------------------------------------------------------|
| 202988_s_at | NM_002922 | RGS1 | Homo sapiens | 6-Oct-14 | Exemplar sequence | GenBank | gb:NM_002922.1 /DEF=Homo sapiens regulator of G-protein signalling 1 (RGS1), mRNA. /FEA=mRNA /GEN=RGS1 /PROD=regulator of G-protein signalling 1 /DB_XREF=gi:4506514 /UG=Hs.75256 regulator of G-protein signalling 1 /FL=gb:NM_002922.1 | NM_002922 | regulator of G-protein signaling 1 | RGS1 | 5996 | NM_002922 | 0006955 // immune response // traceable author statement /// 0007165 // signal transduction // non-traceable author statement /// 0007193 // adenylate cyclase-inhibiting G-protein coupled receptor signaling pathway // traceable author statement /// 0009968 // negative regulation of signal transduction // inferred from electronic annotation /// 0038032 // termination of G-protein coupled receptor signaling pathway // inferred from electronic annotation /// 0043547 // positive regulation of GTPase activity // not recorded /// 0043547 // positive regulation of GTPase activity // traceable | 0005737 // cytoplasm // not recorded /// 0005886 // plasma membrane // not recorded | 0005096 // GTPase activator activity // not recorded /// 0005516 // calmodulin binding // traceable author statement |
|-------------|-----------|------|--------------|----------|-------------------|---------|------------------------------------------------------------------------------------------------------------------------------------------------------------------------------------------------------------------------------------------|-----------|------------------------------------|------|------|-----------|------------------------------------------------------------------------------------------------------------------------------------------------------------------------------------------------------------------------------------------------------------------------------------------------------------------------------------------------------------------------------------------------------------------------------------------------------------------------------------------------------------------------------------------------------------------------------------------------------------------|-------------------------------------------------------------------------------------|----------------------------------------------------------------------------------------------------------------------|

|           |           |      |              |          |                   |         |                                                                                                                                                                                                                                          |           |                                    |      |      |           |                                                                                                                                                                                                                                                                                                                                                                                                                                                                                                                                                                                                                  |                                                                                     |                                                                                                                      |
|-----------|-----------|------|--------------|----------|-------------------|---------|------------------------------------------------------------------------------------------------------------------------------------------------------------------------------------------------------------------------------------------|-----------|------------------------------------|------|------|-----------|------------------------------------------------------------------------------------------------------------------------------------------------------------------------------------------------------------------------------------------------------------------------------------------------------------------------------------------------------------------------------------------------------------------------------------------------------------------------------------------------------------------------------------------------------------------------------------------------------------------|-------------------------------------------------------------------------------------|----------------------------------------------------------------------------------------------------------------------|
| 202989_at | NM_002922 | RGS1 | Homo sapiens | 6-Oct-14 | Exemplar sequence | GenBank | gb:NM_002922.1 /DEF=Homo sapiens regulator of G-protein signalling 1 (RGS1), mRNA. /FEA=mRNA /GEN=RGS1 /PROD=regulator of G-protein signalling 1 /DB_XREF=gi:4506514 /UG=Hs.75256 regulator of G-protein signalling 1 /FL=gb:NM_002922.1 | NM_002922 | regulator of G-protein signaling 1 | RGS1 | 5996 | NM_002922 | 0006955 // immune response // traceable author statement /// 0007165 // signal transduction // non-traceable author statement /// 0007193 // adenylate cyclase-inhibiting G-protein coupled receptor signaling pathway // traceable author statement /// 0009968 // negative regulation of signal transduction // inferred from electronic annotation /// 0038032 // termination of G-protein coupled receptor signaling pathway // inferred from electronic annotation /// 0043547 // positive regulation of GTPase activity // not recorded /// 0043547 // positive regulation of GTPase activity // traceable | 0005737 // cytoplasm // not recorded /// 0005886 // plasma membrane // not recorded | 0005096 // GTPase activator activity // not recorded /// 0005516 // calmodulin binding // traceable author statement |
|-----------|-----------|------|--------------|----------|-------------------|---------|------------------------------------------------------------------------------------------------------------------------------------------------------------------------------------------------------------------------------------------|-----------|------------------------------------|------|------|-----------|------------------------------------------------------------------------------------------------------------------------------------------------------------------------------------------------------------------------------------------------------------------------------------------------------------------------------------------------------------------------------------------------------------------------------------------------------------------------------------------------------------------------------------------------------------------------------------------------------------------|-------------------------------------------------------------------------------------|----------------------------------------------------------------------------------------------------------------------|

|             |           |      |              |          |                   |         |                                                                                                                                                                                                                       |           |                                            |      |      |                                             |                                                                                                                                                                                                                                                                                                                                                                                                                                                                                                                                                                                                                                            |                                                                                                                                                                                                                                                                                                                                |                                                                                                                                                                                                                                                                                                                                                                                                                                                                                                                                                                                                                                                                                                                    |
|-------------|-----------|------|--------------|----------|-------------------|---------|-----------------------------------------------------------------------------------------------------------------------------------------------------------------------------------------------------------------------|-----------|--------------------------------------------|------|------|---------------------------------------------|--------------------------------------------------------------------------------------------------------------------------------------------------------------------------------------------------------------------------------------------------------------------------------------------------------------------------------------------------------------------------------------------------------------------------------------------------------------------------------------------------------------------------------------------------------------------------------------------------------------------------------------------|--------------------------------------------------------------------------------------------------------------------------------------------------------------------------------------------------------------------------------------------------------------------------------------------------------------------------------|--------------------------------------------------------------------------------------------------------------------------------------------------------------------------------------------------------------------------------------------------------------------------------------------------------------------------------------------------------------------------------------------------------------------------------------------------------------------------------------------------------------------------------------------------------------------------------------------------------------------------------------------------------------------------------------------------------------------|
| 203117_s_at | NM_014871 | PAN2 | Homo sapiens | 6-Oct-14 | Exemplar sequence | GenBank | gb:NM_014871.1 /DEF=Homo sapiens KIAA0710 gene product (KIAA0710), mRNA. /FEA=mRNA /GEN=KIAA0710 /PROD=KIAA0710 gene product /DB_XREF=gi:7662257 /UG=Hs.273397 KIAA0710 gene product /FL=gb:AB014610.1 gb:NM_014871.1 | NM_014871 | PAN2 poly(A) specific ribonuclease subunit | PAN2 | 9924 | NM_001127460 /// NM_001166279 /// NM_014871 | 0000184 // nuclear-transcribed mRNA catabolic process, nonsense-mediated decay // inferred from electronic annotation /// 0000288 // nuclear-transcribed mRNA catabolic process, deadenylation-dependent decay // traceable author statement /// 0000289 // nuclear-transcribed mRNA poly(A) tail shortening // traceable author statement /// 0006397 // mRNA processing // inferred from electronic annotation /// 0006511 // ubiquitin-dependent protein catabolic process // inferred from electronic annotation /// 0010467 // gene expression // traceable author statement /// 0016070 // RNA metabolic process // traceable author | 0000932 // cytoplasmic mRNA processing body // inferred from electronic annotation /// 0005634 // nucleus // inferred from electronic annotation /// 0005737 // cytoplasm // inferred from electronic annotation /// 0005829 // cytosol // traceable author statement /// 0031251 // PAN complex // inferred from direct assay | 0000175 // 3'-5'-exoribonuclease activity // inferred from direct assay /// 0003676 // nucleic acid binding // inferred from electronic annotation /// 0004221 // ubiquitin thiolesterase activity // inferred from electronic annotation /// 0004518 // nuclease activity // inferred from electronic annotation /// 0004527 // exonuclease activity // inferred from electronic annotation /// 0004535 // poly(A)-specific ribonuclease activity // inferred from direct assay /// 0004535 // poly(A)-specific ribonuclease activity // traceable author statement /// 0005515 // protein binding // inferred from physical interaction /// 0016787 // hydrolase activity // inferred from electronic annotation |
|-------------|-----------|------|--------------|----------|-------------------|---------|-----------------------------------------------------------------------------------------------------------------------------------------------------------------------------------------------------------------------|-----------|--------------------------------------------|------|------|---------------------------------------------|--------------------------------------------------------------------------------------------------------------------------------------------------------------------------------------------------------------------------------------------------------------------------------------------------------------------------------------------------------------------------------------------------------------------------------------------------------------------------------------------------------------------------------------------------------------------------------------------------------------------------------------------|--------------------------------------------------------------------------------------------------------------------------------------------------------------------------------------------------------------------------------------------------------------------------------------------------------------------------------|--------------------------------------------------------------------------------------------------------------------------------------------------------------------------------------------------------------------------------------------------------------------------------------------------------------------------------------------------------------------------------------------------------------------------------------------------------------------------------------------------------------------------------------------------------------------------------------------------------------------------------------------------------------------------------------------------------------------|

|             |          |       |              |          |                    |         |                                                                                                                                                                                                                     |          |                                                    |       |      |                                                                                                                              |                                                                                                                                                                                                                                                                                                                                                                                                                          |  |                                                                             |
|-------------|----------|-------|--------------|----------|--------------------|---------|---------------------------------------------------------------------------------------------------------------------------------------------------------------------------------------------------------------------|----------|----------------------------------------------------|-------|------|------------------------------------------------------------------------------------------------------------------------------|--------------------------------------------------------------------------------------------------------------------------------------------------------------------------------------------------------------------------------------------------------------------------------------------------------------------------------------------------------------------------------------------------------------------------|--|-----------------------------------------------------------------------------|
| 203289_s_at | BE791629 | NPRL3 | Homo sapiens | 6-Oct-14 | Consensus sequence | GenBank | Consensus includes<br>gb:BE791629<br>/FEA=EST<br>/DB_XREF=gi:10212827<br>/DB_XREF=est:601585959F1<br>/CLONE=IMAGE:3940215<br>/UG=Hs.19699<br>Conserved gene telomeric to alpha globin cluster<br>/FL=gb:NM_012075.1 | BE791629 | nitrogen permease regulator-like 3 (S. cerevisiae) | NPRL3 | 8131 | NM_001039476<br>///<br>NM_001077350<br>///<br>NM_001243247<br>///<br>NM_001243248<br>///<br>NM_001243249<br>///<br>NM_012075 | 0003281 // ventricular septum development // inferred from electronic annotation /// 0035909 // aorta morphogenesis // inferred from electronic annotation /// 0043547 // positive regulation of GTPase activity // inferred from electronic annotation /// 0048738 // cardiac muscle tissue development // inferred from electronic annotation /// 0060021 // palate development // inferred from electronic annotation |  | 0005096 // GTPase activator activity // inferred from electronic annotation |
|-------------|----------|-------|--------------|----------|--------------------|---------|---------------------------------------------------------------------------------------------------------------------------------------------------------------------------------------------------------------------|----------|----------------------------------------------------|-------|------|------------------------------------------------------------------------------------------------------------------------------|--------------------------------------------------------------------------------------------------------------------------------------------------------------------------------------------------------------------------------------------------------------------------------------------------------------------------------------------------------------------------------------------------------------------------|--|-----------------------------------------------------------------------------|

|           |           |          |              |          |                   |         |                                                                                                                                                                                                                                                                                                                                |           |                                                        |          |      |                                                                                                                                                                                               |                                                                                                                                                                                                                                                                                                                                                                                                                                                                                                                                                                                                                                           |                                                                                                                                                                                                                                                                                                                                                              |                                                                                                                                                                                                                                                                                                                         |
|-----------|-----------|----------|--------------|----------|-------------------|---------|--------------------------------------------------------------------------------------------------------------------------------------------------------------------------------------------------------------------------------------------------------------------------------------------------------------------------------|-----------|--------------------------------------------------------|----------|------|-----------------------------------------------------------------------------------------------------------------------------------------------------------------------------------------------|-------------------------------------------------------------------------------------------------------------------------------------------------------------------------------------------------------------------------------------------------------------------------------------------------------------------------------------------------------------------------------------------------------------------------------------------------------------------------------------------------------------------------------------------------------------------------------------------------------------------------------------------|--------------------------------------------------------------------------------------------------------------------------------------------------------------------------------------------------------------------------------------------------------------------------------------------------------------------------------------------------------------|-------------------------------------------------------------------------------------------------------------------------------------------------------------------------------------------------------------------------------------------------------------------------------------------------------------------------|
| 203290_at | NM_002122 | HLA-DQA1 | Homo sapiens | 6-Oct-14 | Exemplar sequence | GenBank | gb:NM_002122.1 /DEF=Homo sapiens major histocompatibility complex, class II, DQ alpha 1 (HLA-DQA1), mRNA. /FEA=mRNA /GEN=HLA-DQA1 /PROD=major histocompatibility complex, class II, DQalpha 1 /DB_XREF=gi:4504406 /UG=Hs.198253 major histocompatibility complex, class II, DQ alpha 1 /FL=gb:M33906.1 gb:M17846.1 gb:M17847.1 | NM_002122 | major histocompatibility complex, class II, DQ alpha 1 | HLA-DQA1 | 3117 | NM_002122 ///<br>XM_003846468 ///<br>XM_005274953 ///<br>XM_005275108 ///<br>XM_005275333 ///<br>XM_005275542 ///<br>XM_005275544 ///<br>XM_006715079 ///<br>XM_006725484 ///<br>XM_006725999 | 0002376 // immune system process // inferred from electronic annotation /// 0002504 // antigen processing and presentation of peptide or polysaccharide antigen via MHC class II // inferred from electronic annotation /// 0006955 // immune response // non-traceable author statement /// 0019221 // cytokine-mediated signaling pathway // traceable author statement /// 0019882 // antigen processing and presentation // inferred from electronic annotation /// 0019886 // antigen processing and presentation of exogenous peptide antigen via MHC class II // traceable author statement /// 0031295 // T cell costimulation // | 0000139 // Golgi membrane // traceable author statement /// 0005764 // lysosome // inferred from electronic annotation /// 0005765 // lysosomal membrane // traceable author statement /// 0005768 // endosome // inferred from electronic annotation /// 0005783 // endoplasmic reticulum // inferred from electronic annotation /// 0005789 // endoplasmic | 0005515 // protein binding // inferred from electronic annotation /// 0032395 // MHC class II receptor activity // non-traceable author statement /// 0032395 // MHC class II receptor activity // traceable author statement /// 0042605 // peptide antigen binding // inferred from sequence or structural similarity |
|-----------|-----------|----------|--------------|----------|-------------------|---------|--------------------------------------------------------------------------------------------------------------------------------------------------------------------------------------------------------------------------------------------------------------------------------------------------------------------------------|-----------|--------------------------------------------------------|----------|------|-----------------------------------------------------------------------------------------------------------------------------------------------------------------------------------------------|-------------------------------------------------------------------------------------------------------------------------------------------------------------------------------------------------------------------------------------------------------------------------------------------------------------------------------------------------------------------------------------------------------------------------------------------------------------------------------------------------------------------------------------------------------------------------------------------------------------------------------------------|--------------------------------------------------------------------------------------------------------------------------------------------------------------------------------------------------------------------------------------------------------------------------------------------------------------------------------------------------------------|-------------------------------------------------------------------------------------------------------------------------------------------------------------------------------------------------------------------------------------------------------------------------------------------------------------------------|

|           |           |        |              |          |                   |         |                                                                                                                                                                                                                                                                 |           |                                  |        |      |                                             |                                                                          |                                                                                  |                                                                                                                                                                                                                                                                                                                      |
|-----------|-----------|--------|--------------|----------|-------------------|---------|-----------------------------------------------------------------------------------------------------------------------------------------------------------------------------------------------------------------------------------------------------------------|-----------|----------------------------------|--------|------|---------------------------------------------|--------------------------------------------------------------------------|----------------------------------------------------------------------------------|----------------------------------------------------------------------------------------------------------------------------------------------------------------------------------------------------------------------------------------------------------------------------------------------------------------------|
| 203314_at | NM_012227 | GTPBP6 | Homo sapiens | 6-Oct-14 | Exemplar sequence | GenBank | gb:NM_012227.1 /DEF=Homo sapiens Pseudoautosomal GTP-binding protein-like (PGPL), mRNA. /FEA=mRNA /GEN=PGPL /PROD=Pseudoautosomal GTP-binding protein-likeprotein /DB_XREF=gi:6912587 /UG=Hs.101033 Pseudoautosomal GTP-binding protein-like /FL=gb:NM_012227.1 | NM_012227 | GTP binding protein 6 (putative) | GTPBP6 | 8225 | NM_012227 /// XM_006724447 /// XM_006724868 | 0015684 // ferrous iron transport // inferred from electronic annotation | 0016021 // integral component of membrane // inferred from electronic annotation | 0000166 // nucleotide binding // inferred from electronic annotation /// 0005525 // GTP binding // inferred from electronic annotation /// 0015093 // ferrous iron transmembrane transporter activity // inferred from electronic annotation /// 0046872 // metal ion binding // inferred from electronic annotation |
|-----------|-----------|--------|--------------|----------|-------------------|---------|-----------------------------------------------------------------------------------------------------------------------------------------------------------------------------------------------------------------------------------------------------------------|-----------|----------------------------------|--------|------|---------------------------------------------|--------------------------------------------------------------------------|----------------------------------------------------------------------------------|----------------------------------------------------------------------------------------------------------------------------------------------------------------------------------------------------------------------------------------------------------------------------------------------------------------------|

|           |           |      |              |          |                   |         |                                                                                                                                                                                                                                               |           |                               |      |      |           |                                                                                                                                                      |                                                                                                                                                 |  |
|-----------|-----------|------|--------------|----------|-------------------|---------|-----------------------------------------------------------------------------------------------------------------------------------------------------------------------------------------------------------------------------------------------|-----------|-------------------------------|------|------|-----------|------------------------------------------------------------------------------------------------------------------------------------------------------|-------------------------------------------------------------------------------------------------------------------------------------------------|--|
| 203729_at | NM_001425 | EMP3 | Homo sapiens | 6-Oct-14 | Exemplar sequence | GenBank | gb:NM_001425.1 /DEF=Homo sapiens epithelial membrane protein 3 (EMP3), mRNA. /FEA=mRNA /GEN=EMP3 /PROD=epithelial membrane protein 3 /DB_XREF=gi:4503562 /UG=Hs.9999 epithelial membrane protein 3 /FL=gb:U52101.1 gb:U87947.1 gb:NM_001425.1 | NM_001425 | epithelial membrane protein 3 | EMP3 | 2014 | NM_001425 | 0008285 // negative regulation of cell proliferation // traceable author statement /// 0016049 // cell growth // inferred from electronic annotation | 0016020 // membrane // inferred from electronic annotation /// 0016021 // integral component of membrane // inferred from electronic annotation |  |
|-----------|-----------|------|--------------|----------|-------------------|---------|-----------------------------------------------------------------------------------------------------------------------------------------------------------------------------------------------------------------------------------------------|-----------|-------------------------------|------|------|-----------|------------------------------------------------------------------------------------------------------------------------------------------------------|-------------------------------------------------------------------------------------------------------------------------------------------------|--|

|             |           |        |              |          |                   |         |                                                                                                                                                                                                                                                                                              |           |                                       |        |     |                                                                                                                                                                                                                                                                                                   |                                                                                                                                                                                                                                                                                                                                                                                                                                                                                                                                                                                                                                     |                                                                                                                                                                  |                                                                                                                                                                                                                                                                                                                                                                                                                                                                                                                                                                                                                                                                 |
|-------------|-----------|--------|--------------|----------|-------------------|---------|----------------------------------------------------------------------------------------------------------------------------------------------------------------------------------------------------------------------------------------------------------------------------------------------|-----------|---------------------------------------|--------|-----|---------------------------------------------------------------------------------------------------------------------------------------------------------------------------------------------------------------------------------------------------------------------------------------------------|-------------------------------------------------------------------------------------------------------------------------------------------------------------------------------------------------------------------------------------------------------------------------------------------------------------------------------------------------------------------------------------------------------------------------------------------------------------------------------------------------------------------------------------------------------------------------------------------------------------------------------------|------------------------------------------------------------------------------------------------------------------------------------------------------------------|-----------------------------------------------------------------------------------------------------------------------------------------------------------------------------------------------------------------------------------------------------------------------------------------------------------------------------------------------------------------------------------------------------------------------------------------------------------------------------------------------------------------------------------------------------------------------------------------------------------------------------------------------------------------|
| 203865_s_at | NM_015833 | ADARB1 | Homo sapiens | 6-Oct-14 | Exemplar sequence | GenBank | gb:NM_015833.1 /DEF=Homo sapiens adenosine deaminase, RNA-specific, B1 (homolog of rat RED1) (ADARB1), transcript variant DRABA2b, mRNA. /FEA=mRNA /GEN=ADARB1 /PROD=RNA-specific adenosine deaminase B1, isoformDRABA2b /DB_XREF=gi:7669476 /UG=Hs.85302 adenosine deaminase, RNA-specific, | NM_015833 | adenosine deaminase, RNA-specific, B1 | ADARB1 | 104 | NM_001033049<br>/// NM_001112<br>///<br>NM_001160230<br>/// NM_015833<br>/// NM_015834<br>/// NR_027672 ///<br>NR_027673 ///<br>NR_027674 ///<br>NR_073200 ///<br>XM_006723953<br>///<br>XM_006723954<br>///<br>XM_006723955<br>///<br>XM_006723956<br>///<br>XM_006723957<br>///<br>XM_006723958 | 0002376 // immune system process // inferred from electronic annotation /// 0006382 // adenosine to inosine editing // inferred from direct assay /// 0006382 // adenosine to inosine editing // traceable author statement /// 0006396 // RNA processing // inferred from direct assay /// 0006397 // mRNA processing // inferred from electronic annotation /// 0008285 // negative regulation of cell proliferation // inferred from direct assay /// 0010467 // gene expression // traceable author statement /// 0016553 // base conversion or substitution editing // inferred by curator /// 0016556 // mRNA modification // | 0005634 // nucleus // inferred from direct assay /// 0005654 // nucleoplasm // traceable author statement /// 0005730 // nucleolus // inferred from direct assay | 0003723 // RNA binding // inferred from direct assay /// 0003725 // double-stranded RNA binding // inferred from direct assay /// 0003726 // double-stranded RNA adenosine deaminase activity // inferred from direct assay /// 0003729 // mRNA binding // traceable author statement /// 0004000 // adenosine deaminase activity // inferred from electronic annotation /// 0005515 // protein binding // inferred from physical interaction /// 0016787 // hydrolase activity // inferred from electronic annotation /// 0044822 // poly(A) RNA binding // inferred from direct assay /// 0046872 // metal ion binding // inferred from electronic annotation |
|-------------|-----------|--------|--------------|----------|-------------------|---------|----------------------------------------------------------------------------------------------------------------------------------------------------------------------------------------------------------------------------------------------------------------------------------------------|-----------|---------------------------------------|--------|-----|---------------------------------------------------------------------------------------------------------------------------------------------------------------------------------------------------------------------------------------------------------------------------------------------------|-------------------------------------------------------------------------------------------------------------------------------------------------------------------------------------------------------------------------------------------------------------------------------------------------------------------------------------------------------------------------------------------------------------------------------------------------------------------------------------------------------------------------------------------------------------------------------------------------------------------------------------|------------------------------------------------------------------------------------------------------------------------------------------------------------------|-----------------------------------------------------------------------------------------------------------------------------------------------------------------------------------------------------------------------------------------------------------------------------------------------------------------------------------------------------------------------------------------------------------------------------------------------------------------------------------------------------------------------------------------------------------------------------------------------------------------------------------------------------------------|



|           |           |      |              |          |                   |         |                                                                                                                                                                                        |           |                              |      |      |                            |                                                                                                                                                                                                                                                                                                                                                                                                                                                                                                                                                                                                    |                                                                                                                                                                                                                                                                                                                                                                                         |                                                                                                                                                                                                                                                                                                                                                                               |
|-----------|-----------|------|--------------|----------|-------------------|---------|----------------------------------------------------------------------------------------------------------------------------------------------------------------------------------------|-----------|------------------------------|------|------|----------------------------|----------------------------------------------------------------------------------------------------------------------------------------------------------------------------------------------------------------------------------------------------------------------------------------------------------------------------------------------------------------------------------------------------------------------------------------------------------------------------------------------------------------------------------------------------------------------------------------------------|-----------------------------------------------------------------------------------------------------------------------------------------------------------------------------------------------------------------------------------------------------------------------------------------------------------------------------------------------------------------------------------------|-------------------------------------------------------------------------------------------------------------------------------------------------------------------------------------------------------------------------------------------------------------------------------------------------------------------------------------------------------------------------------|
| 203939_at | NM_002526 | NT5E | Homo sapiens | 6-Oct-14 | Exemplar sequence | GenBank | gb:NM_002526.1 /DEF=Homo sapiens 5 nucleotidase (CD73) (NT5), mRNA. /FEA=mRNA /GEN=NT5 /PROD=5 nucleotidase /DB_XREF=gi:4505466 /UG=Hs.153952 5 nucleotidase (CD73) /FL=gb:NM_002526.1 | NM_002526 | 5'-nucleotidase, ecto (CD73) | NT5E | 4907 | NM_001204813 /// NM_002526 | 0006144 // purine nucleobase metabolic process // traceable author statement /// 0006195 // purine nucleotide catabolic process // traceable author statement /// 0006196 // AMP catabolic process // inferred from electronic annotation /// 0006206 // pyrimidine nucleobase metabolic process // traceable author statement /// 0006259 // DNA metabolic process // traceable author statement /// 0009166 // nucleotide catabolic process // inferred from electronic annotation /// 0016311 // dephosphorylation // not recorded /// 0016311 // dephosphorylation // inferred from electronic | 0005737 // cytoplasm // inferred from direct assay /// 0005886 // plasma membrane // inferred from direct assay /// 0005886 // plasma membrane // traceable author statement /// 0016020 // membrane // traceable author statement /// 0031225 // anchored component of membrane // inferred from electronic annotation /// 0070062 // extracellular vesicular exosome // inferred from | 0000166 // nucleotide binding // inferred from electronic annotation /// 0008253 // 5'-nucleotidase activity // not recorded /// 0016787 // hydrolase activity // inferred from electronic annotation /// 0016788 // hydrolase activity, acting on ester bonds // inferred from electronic annotation /// 0046872 // metal ion binding // inferred from electronic annotation |
|-----------|-----------|------|--------------|----------|-------------------|---------|----------------------------------------------------------------------------------------------------------------------------------------------------------------------------------------|-----------|------------------------------|------|------|----------------------------|----------------------------------------------------------------------------------------------------------------------------------------------------------------------------------------------------------------------------------------------------------------------------------------------------------------------------------------------------------------------------------------------------------------------------------------------------------------------------------------------------------------------------------------------------------------------------------------------------|-----------------------------------------------------------------------------------------------------------------------------------------------------------------------------------------------------------------------------------------------------------------------------------------------------------------------------------------------------------------------------------------|-------------------------------------------------------------------------------------------------------------------------------------------------------------------------------------------------------------------------------------------------------------------------------------------------------------------------------------------------------------------------------|

|             |          |       |              |          |                    |         |                                                                                                                                                                                               |          |           |       |      |           |                                                                                                                                                                                                                                        |                                                                                                                                                                                                                                                                                                                                                                                                         |                                                                                                                                                                                                                                                                                                                                      |
|-------------|----------|-------|--------------|----------|--------------------|---------|-----------------------------------------------------------------------------------------------------------------------------------------------------------------------------------------------|----------|-----------|-------|------|-----------|----------------------------------------------------------------------------------------------------------------------------------------------------------------------------------------------------------------------------------------|---------------------------------------------------------------------------------------------------------------------------------------------------------------------------------------------------------------------------------------------------------------------------------------------------------------------------------------------------------------------------------------------------------|--------------------------------------------------------------------------------------------------------------------------------------------------------------------------------------------------------------------------------------------------------------------------------------------------------------------------------------|
| 203953_s_at | BE791251 | CLDN3 | Homo sapiens | 6-Oct-14 | Consensus sequence | GenBank | Consensus includes<br>gb:BE791251<br>/FEA=EST<br>/DB_XREF=gj:10212449<br>/DB_XREF=est:601583966F1<br>/CLONE=IMAGE:3938249<br>/UG=Hs.25640<br>claudin 3<br>/FL=gb:AB000714.1<br>gb:NM_001306.1 | BE791251 | claudin 3 | CLDN3 | 1365 | NM_001306 | 0001666 // response to hypoxia // inferred from expression pattern ///<br>0007165 // signal transduction // traceable author statement ///<br>0016338 // calcium-independent cell-cell adhesion // inferred from electronic annotation | 0005886 // plasma membrane // inferred from electronic annotation ///<br>0005887 // integral component of plasma membrane // traceable author statement ///<br>0005923 // tight junction // inferred from electronic annotation ///<br>0016020 // membrane // inferred from electronic annotation ///<br>0016021 // integral component of membrane // traceable author statement ///<br>0030054 // cell | 0004888 // transmembrane signaling receptor activity // traceable author statement ///<br>0005198 // structural molecule activity // inferred from electronic annotation ///<br>0005515 // protein binding // inferred from electronic annotation ///<br>0042802 // identical protein binding // inferred from electronic annotation |
|-------------|----------|-------|--------------|----------|--------------------|---------|-----------------------------------------------------------------------------------------------------------------------------------------------------------------------------------------------|----------|-----------|-------|------|-----------|----------------------------------------------------------------------------------------------------------------------------------------------------------------------------------------------------------------------------------------|---------------------------------------------------------------------------------------------------------------------------------------------------------------------------------------------------------------------------------------------------------------------------------------------------------------------------------------------------------------------------------------------------------|--------------------------------------------------------------------------------------------------------------------------------------------------------------------------------------------------------------------------------------------------------------------------------------------------------------------------------------|

|             |           |       |              |          |                   |         |                                                                                                                                                                            |           |           |       |      |           |                                                                                                                                                                                                                                  |                                                                                                                                                                                                                                                                                                                                                                                          |                                                                                                                                                                                                                                                                                                                             |
|-------------|-----------|-------|--------------|----------|-------------------|---------|----------------------------------------------------------------------------------------------------------------------------------------------------------------------------|-----------|-----------|-------|------|-----------|----------------------------------------------------------------------------------------------------------------------------------------------------------------------------------------------------------------------------------|------------------------------------------------------------------------------------------------------------------------------------------------------------------------------------------------------------------------------------------------------------------------------------------------------------------------------------------------------------------------------------------|-----------------------------------------------------------------------------------------------------------------------------------------------------------------------------------------------------------------------------------------------------------------------------------------------------------------------------|
| 203954_x_at | NM_001306 | CLDN3 | Homo sapiens | 6-Oct-14 | Exemplar sequence | GenBank | gb:NM_001306.1 /DEF=Homo sapiens claudin 3 (CLDN3), mRNA. /FEA=mRNA /GEN=CLDN3 /PROD=claudin 3 /DB_XREF=gi:4502874 /UG=Hs.25640 claudin 3 /FL=gb:AB000714.1 gb:NM_001306.1 | NM_001306 | claudin 3 | CLDN3 | 1365 | NM_001306 | 0001666 // response to hypoxia // inferred from expression pattern /// 0007165 // signal transduction // traceable author statement /// 0016338 // calcium-independent cell-cell adhesion // inferred from electronic annotation | 0005886 // plasma membrane // inferred from electronic annotation /// 0005887 // integral component of plasma membrane // traceable author statement /// 0005923 // tight junction // inferred from electronic annotation /// 0016020 // membrane // inferred from electronic annotation /// 0016021 // integral component of membrane // traceable author statement /// 0030054 // cell | 0004888 // transmembrane signaling receptor activity // traceable author statement /// 0005198 // structural molecule activity // inferred from electronic annotation /// 0005515 // protein binding // inferred from electronic annotation /// 0042802 // identical protein binding // inferred from electronic annotation |
|-------------|-----------|-------|--------------|----------|-------------------|---------|----------------------------------------------------------------------------------------------------------------------------------------------------------------------------|-----------|-----------|-------|------|-----------|----------------------------------------------------------------------------------------------------------------------------------------------------------------------------------------------------------------------------------|------------------------------------------------------------------------------------------------------------------------------------------------------------------------------------------------------------------------------------------------------------------------------------------------------------------------------------------------------------------------------------------|-----------------------------------------------------------------------------------------------------------------------------------------------------------------------------------------------------------------------------------------------------------------------------------------------------------------------------|

|             |           |        |              |          |                   |         |                                                                                                                                                                                                                                                                                                             |           |                                                                                  |        |      |                                                                                             |                                                                                                                                                                                                                                                                                                                                                                                                                                                                                                                                                                                                                                             |                                                                                                                                                                                                                                                                                                                                                                                    |                                                                                                                                                                                                                                                                        |
|-------------|-----------|--------|--------------|----------|-------------------|---------|-------------------------------------------------------------------------------------------------------------------------------------------------------------------------------------------------------------------------------------------------------------------------------------------------------------|-----------|----------------------------------------------------------------------------------|--------|------|---------------------------------------------------------------------------------------------|---------------------------------------------------------------------------------------------------------------------------------------------------------------------------------------------------------------------------------------------------------------------------------------------------------------------------------------------------------------------------------------------------------------------------------------------------------------------------------------------------------------------------------------------------------------------------------------------------------------------------------------------|------------------------------------------------------------------------------------------------------------------------------------------------------------------------------------------------------------------------------------------------------------------------------------------------------------------------------------------------------------------------------------|------------------------------------------------------------------------------------------------------------------------------------------------------------------------------------------------------------------------------------------------------------------------|
| 204087_s_at | NM_021095 | SLC5A6 | Homo sapiens | 6-Oct-14 | Exemplar sequence | GenBank | gb:NM_021095.1 /DEF=Homo sapiens solute carrier family 5 (sodium-dependent vitamin transporter), member 6 (SLC5A6), mRNA. /FEA=mRNA /GEN=SLC5A6 /PROD=solute carrier family 5 (sodium-dependent vitamin transporter), member 6 /DB_XREF=gi:10863878 /UG=Hs.321579 solute carrier family 5 (sodium-dependent | NM_021095 | solute carrier family 5 (sodium/multivitamin and iodide cotransporter), member 6 | SLC5A6 | 8884 | NM_021095 /// NR_028323 /// XM_006712128 /// XM_006712129 /// XM_006712130 /// XM_006712131 | 0006766 // vitamin metabolic process // traceable author statement /// 0006767 // water-soluble vitamin metabolic process // traceable author statement /// 0006768 // biotin metabolic process // traceable author statement /// 0006810 // transport // traceable author statement /// 0006811 // ion transport // inferred from electronic annotation /// 0006814 // sodium ion transport // inferred from electronic annotation /// 0015878 // biotin transport // inferred from electronic annotation /// 0015887 // pantothenate transmembrane transport // inferred from electronic annotation /// 0015939 // pantothenate metabolic | 0005886 // plasma membrane // traceable author statement /// 0005887 // integral component of plasma membrane // traceable author statement /// 0012506 // vesicle membrane // inferred from electronic annotation /// 0016020 // membrane // traceable author statement /// 0016021 // integral component of membrane // inferred from electronic annotation /// 0031526 // brush | 0005215 // transporter activity // inferred from electronic annotation /// 0008523 // sodium-dependent multivitamin transmembrane transporter activity // inferred from electronic annotation /// 0015293 // symporter activity // inferred from electronic annotation |
|-------------|-----------|--------|--------------|----------|-------------------|---------|-------------------------------------------------------------------------------------------------------------------------------------------------------------------------------------------------------------------------------------------------------------------------------------------------------------|-----------|----------------------------------------------------------------------------------|--------|------|---------------------------------------------------------------------------------------------|---------------------------------------------------------------------------------------------------------------------------------------------------------------------------------------------------------------------------------------------------------------------------------------------------------------------------------------------------------------------------------------------------------------------------------------------------------------------------------------------------------------------------------------------------------------------------------------------------------------------------------------------|------------------------------------------------------------------------------------------------------------------------------------------------------------------------------------------------------------------------------------------------------------------------------------------------------------------------------------------------------------------------------------|------------------------------------------------------------------------------------------------------------------------------------------------------------------------------------------------------------------------------------------------------------------------|

|             |        |       |              |          |                    |         |                                                                                                                                                                                                |        |                 |       |      |                                                                    |                                                                                                                                                                                                                                                                                                                                                                                                                                                                                                                                                                                                                                                        |                                                                                                                                                                                                                                                                                    |                                                                                                                                                                                                                                                                                                                                                                                                                                                                                                                                                                                                                                                    |
|-------------|--------|-------|--------------|----------|--------------------|---------|------------------------------------------------------------------------------------------------------------------------------------------------------------------------------------------------|--------|-----------------|-------|------|--------------------------------------------------------------------|--------------------------------------------------------------------------------------------------------------------------------------------------------------------------------------------------------------------------------------------------------------------------------------------------------------------------------------------------------------------------------------------------------------------------------------------------------------------------------------------------------------------------------------------------------------------------------------------------------------------------------------------------------|------------------------------------------------------------------------------------------------------------------------------------------------------------------------------------------------------------------------------------------------------------------------------------|----------------------------------------------------------------------------------------------------------------------------------------------------------------------------------------------------------------------------------------------------------------------------------------------------------------------------------------------------------------------------------------------------------------------------------------------------------------------------------------------------------------------------------------------------------------------------------------------------------------------------------------------------|
| 204131_s_at | N25732 | FOXO3 | Homo sapiens | 6-Oct-14 | Consensus sequence | GenBank | Consensus includes<br>gb:N25732<br>/FEA=EST<br>/DB_XREF=gi:140080<br>/DB_XREF=est:yx83c03.s1<br>/CLONE=IMAGE:268324<br>/UG=Hs.14845<br>forkhead box O3A<br>/FL=gb:AF032886.1<br>gb:NM_001455.1 | N25732 | forkhead box O3 | FOXO3 | 2309 | NM_001455 ///<br>NM_201559 ///<br>XM_005266867 ///<br>XM_005266868 | 0000122 // negative regulation of transcription from RNA polymerase II promoter // inferred from mutant phenotype ///<br>0001542 // ovulation from ovarian follicle // inferred from electronic annotation ///<br>0001544 // initiation of primordial ovarian follicle growth // inferred from electronic annotation ///<br>0001547 // antral ovarian follicle growth // inferred from electronic annotation ///<br>0001556 // oocyte maturation // inferred from electronic annotation ///<br>0006351 // transcription, DNA-templated // inferred from electronic annotation ///<br>0006355 // regulation of transcription, DNA-templated // inferred | 0005634 // nucleus // inferred from direct assay ///<br>0005654 // nucleoplasm // traceable author statement ///<br>0005737 // cytoplasm // inferred from direct assay ///<br>0005829 // cytosol // not recorded ///<br>0016020 // membrane // inferred from electronic annotation | 0001047 // core promoter binding // inferred from sequence or structural similarity ///<br>0003677 // DNA binding // inferred from direct assay ///<br>0003700 // sequence-specific DNA binding transcription factor activity // inferred from direct assay ///<br>0005515 // protein binding // inferred from physical interaction ///<br>0008301 // DNA binding, bending // not recorded ///<br>0019901 // protein kinase binding // inferred from physical interaction ///<br>0031490 // chromatin DNA binding // inferred from sequence or structural similarity ///<br>0043565 // sequence-specific DNA binding // inferred from direct assay |
|-------------|--------|-------|--------------|----------|--------------------|---------|------------------------------------------------------------------------------------------------------------------------------------------------------------------------------------------------|--------|-----------------|-------|------|--------------------------------------------------------------------|--------------------------------------------------------------------------------------------------------------------------------------------------------------------------------------------------------------------------------------------------------------------------------------------------------------------------------------------------------------------------------------------------------------------------------------------------------------------------------------------------------------------------------------------------------------------------------------------------------------------------------------------------------|------------------------------------------------------------------------------------------------------------------------------------------------------------------------------------------------------------------------------------------------------------------------------------|----------------------------------------------------------------------------------------------------------------------------------------------------------------------------------------------------------------------------------------------------------------------------------------------------------------------------------------------------------------------------------------------------------------------------------------------------------------------------------------------------------------------------------------------------------------------------------------------------------------------------------------------------|

|             |           |       |              |          |                   |         |                                                                                                                                                                                                   |           |                                                 |                  |               |                                                                         |                                                                                                                                                                                                                                                                                                                                                                                                                                                                                                                                                                                                                                      |                                                                                                                                                                                                                                                                        |                                                                                                                                                                                                                                                                                                                                                                                                                                                                                                                                                                                                                               |
|-------------|-----------|-------|--------------|----------|-------------------|---------|---------------------------------------------------------------------------------------------------------------------------------------------------------------------------------------------------|-----------|-------------------------------------------------|------------------|---------------|-------------------------------------------------------------------------|--------------------------------------------------------------------------------------------------------------------------------------------------------------------------------------------------------------------------------------------------------------------------------------------------------------------------------------------------------------------------------------------------------------------------------------------------------------------------------------------------------------------------------------------------------------------------------------------------------------------------------------|------------------------------------------------------------------------------------------------------------------------------------------------------------------------------------------------------------------------------------------------------------------------|-------------------------------------------------------------------------------------------------------------------------------------------------------------------------------------------------------------------------------------------------------------------------------------------------------------------------------------------------------------------------------------------------------------------------------------------------------------------------------------------------------------------------------------------------------------------------------------------------------------------------------|
| 204132_s_at | NM_001455 | FOXO3 | Homo sapiens | 6-Oct-14 | Exemplar sequence | GenBank | gb:NM_001455.1 /DEF=Homo sapiens forkhead box O3A (FOXO3A), mRNA. /FEA=mRNA /GEN=FOXO3A /PROD=forkhead box O3A /DB_XREF=gi:4503738 /UG=Hs.14845 forkhead box O3A /FL=gb:AF032886.1 gb:NM_001455.1 | NM_001455 | forkhead box O3 /// forkhead box O3B pseudogene | FOXO3 /// FOXO3B | 2309 /// 2310 | NM_001455 /// NM_201559 /// NR_026718 /// XM_005266867 /// XM_005266868 | 0000122 // negative regulation of transcription from RNA polymerase II promoter // inferred from mutant phenotype /// 0001542 // ovulation from ovarian follicle // inferred from electronic annotation /// 0001544 // initiation of primordial ovarian follicle growth // inferred from electronic annotation /// 0001547 // antral ovarian follicle growth // inferred from electronic annotation /// 0001556 // oocyte maturation // inferred from electronic annotation /// 0006351 // transcription, DNA-templated // inferred from electronic annotation /// 0006355 // regulation of transcription, DNA-templated // inferred | 0005634 // nucleus // inferred from direct assay /// 0005654 // nucleoplasm // traceable author statement /// 0005737 // cytoplasm // inferred from direct assay /// 0005829 // cytosol // not recorded /// 0016020 // membrane // inferred from electronic annotation | 0001047 // core promoter binding // inferred from sequence or structural similarity /// 0003677 // DNA binding // inferred from direct assay /// 0003700 // sequence-specific DNA binding transcription factor activity // inferred from direct assay /// 0005515 // protein binding // inferred from physical interaction /// 0008301 // DNA binding, bending // not recorded /// 0019901 // protein kinase binding // inferred from physical interaction /// 0031490 // chromatin DNA binding // inferred from sequence or structural similarity /// 0043565 // sequence-specific DNA binding // inferred from direct assay |
|-------------|-----------|-------|--------------|----------|-------------------|---------|---------------------------------------------------------------------------------------------------------------------------------------------------------------------------------------------------|-----------|-------------------------------------------------|------------------|---------------|-------------------------------------------------------------------------|--------------------------------------------------------------------------------------------------------------------------------------------------------------------------------------------------------------------------------------------------------------------------------------------------------------------------------------------------------------------------------------------------------------------------------------------------------------------------------------------------------------------------------------------------------------------------------------------------------------------------------------|------------------------------------------------------------------------------------------------------------------------------------------------------------------------------------------------------------------------------------------------------------------------|-------------------------------------------------------------------------------------------------------------------------------------------------------------------------------------------------------------------------------------------------------------------------------------------------------------------------------------------------------------------------------------------------------------------------------------------------------------------------------------------------------------------------------------------------------------------------------------------------------------------------------|

|           |           |        |              |          |                   |         |                                                                                                                                                                                                                           |           |                            |        |      |           |                                                                                                                                                                                                                                                                                                                                                                                                                                                                            |                                                                                                                                                                                                                                                                                                                                                                                                        |                                                                                                                                                                                                                                                                                                           |
|-----------|-----------|--------|--------------|----------|-------------------|---------|---------------------------------------------------------------------------------------------------------------------------------------------------------------------------------------------------------------------------|-----------|----------------------------|--------|------|-----------|----------------------------------------------------------------------------------------------------------------------------------------------------------------------------------------------------------------------------------------------------------------------------------------------------------------------------------------------------------------------------------------------------------------------------------------------------------------------------|--------------------------------------------------------------------------------------------------------------------------------------------------------------------------------------------------------------------------------------------------------------------------------------------------------------------------------------------------------------------------------------------------------|-----------------------------------------------------------------------------------------------------------------------------------------------------------------------------------------------------------------------------------------------------------------------------------------------------------|
| 204141_at | NM_001069 | TUBB2A | Homo sapiens | 6-Oct-14 | Exemplar sequence | GenBank | gb:NM_001069.1 /DEF=Homo sapiens tubulin, beta polypeptide (TUBB), mRNA. /FEA=mRNA /GEN=TUBB /PROD=tubulin, beta polypeptide /DB_XREF=gi:4507728 /UG=Hs.179661 tubulin, beta polypeptide /FL=gb:BC001194.1 gb:NM_001069.1 | NM_001069 | tubulin, beta 2A class IIa | TUBB2A | 7280 | NM_001069 | 0006184 // GTP catabolic process // inferred from electronic annotation /// 0006457 // protein folding // traceable author statement /// 0007017 // microtubule-based process // inferred from electronic annotation /// 0044267 // cellular protein metabolic process // traceable author statement /// 0051084 // 'de novo' posttranslational protein folding // traceable author statement /// 0051258 // protein polymerization // inferred from electronic annotation | 0005634 // nucleus // inferred from direct assay /// 0005737 // cytoplasm // inferred from electronic annotation /// 0005856 // cytoskeleton // inferred from electronic annotation /// 0005874 // microtubule // inferred from direct assay /// 0005886 // plasma membrane // inferred from direct assay /// 0015630 // microtubule cytoskeleton // inferred from direct assay /// 0043234 // protein | 0000166 // nucleotide binding // inferred from electronic annotation /// 0003924 // GTPase activity // inferred from electronic annotation /// 0005200 // structural constituent of cytoskeleton // inferred from electronic annotation /// 0005525 // GTP binding // inferred from electronic annotation |
|-----------|-----------|--------|--------------|----------|-------------------|---------|---------------------------------------------------------------------------------------------------------------------------------------------------------------------------------------------------------------------------|-----------|----------------------------|--------|------|-----------|----------------------------------------------------------------------------------------------------------------------------------------------------------------------------------------------------------------------------------------------------------------------------------------------------------------------------------------------------------------------------------------------------------------------------------------------------------------------------|--------------------------------------------------------------------------------------------------------------------------------------------------------------------------------------------------------------------------------------------------------------------------------------------------------------------------------------------------------------------------------------------------------|-----------------------------------------------------------------------------------------------------------------------------------------------------------------------------------------------------------------------------------------------------------------------------------------------------------|

|             |          |        |              |          |                    |         |                                                                                                                                                                                                                 |          |                                                   |        |      |           |                                                                                                                                                                                                                                                                                                                                                                                                                                                                                                                                                                                                                                     |                                                                                                                                                                                                                                                                                                 |                                                                  |
|-------------|----------|--------|--------------|----------|--------------------|---------|-----------------------------------------------------------------------------------------------------------------------------------------------------------------------------------------------------------------|----------|---------------------------------------------------|--------|------|-----------|-------------------------------------------------------------------------------------------------------------------------------------------------------------------------------------------------------------------------------------------------------------------------------------------------------------------------------------------------------------------------------------------------------------------------------------------------------------------------------------------------------------------------------------------------------------------------------------------------------------------------------------|-------------------------------------------------------------------------------------------------------------------------------------------------------------------------------------------------------------------------------------------------------------------------------------------------|------------------------------------------------------------------|
| 204285_s_at | AI857639 | PMAIP1 | Homo sapiens | 6-Oct-14 | Consensus sequence | GenBank | Consensus includes<br>gb:AI857639<br>/FEA=EST<br>/DB_XREF=gi:5511255<br>/DB_XREF=est:wk95g09.x1<br>/CLONE=IMAGE:2423200<br>/UG=Hs.96<br>phorbol-12-myristate-13-acetate-induced protein 1<br>/FL=gb:NM_021127.1 | AI857639 | phorbol-12-myristate-13-acetate-induced protein 1 | PMAIP1 | 5366 | NM_021127 | 0001836 // release of cytochrome c from mitochondria // inferred from electronic annotation /// 0006915 // apoptotic process // inferred from mutant phenotype /// 0006915 // apoptotic process // traceable author statement /// 0006919 // activation of cysteine-type endopeptidase activity involved in apoptotic process // inferred from electronic annotation /// 0006974 // cellular response to DNA damage stimulus // inferred from electronic annotation /// 0008630 // intrinsic apoptotic signaling pathway in response to DNA damage // inferred from electronic annotation /// 0009411 // response to UV // inferred | 0005634 // nucleus // inferred from direct assay /// 0005739 // mitochondrion // inferred from direct assay /// 0005741 // mitochondrial outer membrane // traceable author statement /// 0005829 // cytosol // inferred from direct assay /// 0005829 // cytosol // traceable author statement | 0005515 // protein binding // inferred from physical interaction |
|-------------|----------|--------|--------------|----------|--------------------|---------|-----------------------------------------------------------------------------------------------------------------------------------------------------------------------------------------------------------------|----------|---------------------------------------------------|--------|------|-----------|-------------------------------------------------------------------------------------------------------------------------------------------------------------------------------------------------------------------------------------------------------------------------------------------------------------------------------------------------------------------------------------------------------------------------------------------------------------------------------------------------------------------------------------------------------------------------------------------------------------------------------------|-------------------------------------------------------------------------------------------------------------------------------------------------------------------------------------------------------------------------------------------------------------------------------------------------|------------------------------------------------------------------|



|             |           |        |              |          |                   |         |                                                                                                                                                                                                                                                                                     |           |                                                   |        |      |           |                                                                                                                                                                                                                                                                                                                                                                                                                                                                                                                                                                                                                                     |                                                                                                                                                                                                                                                                                                 |                                                                  |
|-------------|-----------|--------|--------------|----------|-------------------|---------|-------------------------------------------------------------------------------------------------------------------------------------------------------------------------------------------------------------------------------------------------------------------------------------|-----------|---------------------------------------------------|--------|------|-----------|-------------------------------------------------------------------------------------------------------------------------------------------------------------------------------------------------------------------------------------------------------------------------------------------------------------------------------------------------------------------------------------------------------------------------------------------------------------------------------------------------------------------------------------------------------------------------------------------------------------------------------------|-------------------------------------------------------------------------------------------------------------------------------------------------------------------------------------------------------------------------------------------------------------------------------------------------|------------------------------------------------------------------|
| 204286_s_at | NM_021127 | PMAIP1 | Homo sapiens | 6-Oct-14 | Exemplar sequence | GenBank | gb:NM_021127.1 /DEF=Homo sapiens phorbol-12-myristate-13-acetate-induced protein 1 (PMAIP1), mRNA. /FEA=mRNA /GEN=PMAIP1 /PROD=phorbol-12-myristate-13-acetate-induced protein1 /DB_XREF=gi:10863922 /UG=Hs.96 phorbol-12-myristate-13-acetate-induced protein 1 /FL=gb:NM_021127.1 | NM_021127 | phorbol-12-myristate-13-acetate-induced protein 1 | PMAIP1 | 5366 | NM_021127 | 0001836 // release of cytochrome c from mitochondria // inferred from electronic annotation /// 0006915 // apoptotic process // inferred from mutant phenotype /// 0006915 // apoptotic process // traceable author statement /// 0006919 // activation of cysteine-type endopeptidase activity involved in apoptotic process // inferred from electronic annotation /// 0006974 // cellular response to DNA damage stimulus // inferred from electronic annotation /// 0008630 // intrinsic apoptotic signaling pathway in response to DNA damage // inferred from electronic annotation /// 0009411 // response to UV // inferred | 0005634 // nucleus // inferred from direct assay /// 0005739 // mitochondrion // inferred from direct assay /// 0005741 // mitochondrial outer membrane // traceable author statement /// 0005829 // cytosol // inferred from direct assay /// 0005829 // cytosol // traceable author statement | 0005515 // protein binding // inferred from physical interaction |
|-------------|-----------|--------|--------------|----------|-------------------|---------|-------------------------------------------------------------------------------------------------------------------------------------------------------------------------------------------------------------------------------------------------------------------------------------|-----------|---------------------------------------------------|--------|------|-----------|-------------------------------------------------------------------------------------------------------------------------------------------------------------------------------------------------------------------------------------------------------------------------------------------------------------------------------------------------------------------------------------------------------------------------------------------------------------------------------------------------------------------------------------------------------------------------------------------------------------------------------------|-------------------------------------------------------------------------------------------------------------------------------------------------------------------------------------------------------------------------------------------------------------------------------------------------|------------------------------------------------------------------|

|             |           |      |              |          |                   |         |                                                                                                                                                                                       |           |                    |      |      |           |                                                                                                                                                                                                                                                                                                                                                                                                                            |                                                                                                                                                                                                           |                                                                                                                                               |
|-------------|-----------|------|--------------|----------|-------------------|---------|---------------------------------------------------------------------------------------------------------------------------------------------------------------------------------------|-----------|--------------------|------|------|-----------|----------------------------------------------------------------------------------------------------------------------------------------------------------------------------------------------------------------------------------------------------------------------------------------------------------------------------------------------------------------------------------------------------------------------------|-----------------------------------------------------------------------------------------------------------------------------------------------------------------------------------------------------------|-----------------------------------------------------------------------------------------------------------------------------------------------|
| 204326_x_at | NM_002450 | MT1X | Homo sapiens | 6-Oct-14 | Exemplar sequence | GenBank | gb:NM_002450.1 /DEF=Homo sapiens metallothionein 1L (MT1L), mRNA. /FEA=mRNA /GEN=MT1L /PROD=metallothionein 1L /DB_XREF=gi:4505270 /UG=Hs.94360 metallothionein 1L /FL=gb:NM_002450.1 | NM_002450 | metallothionein 1X | MT1X | 4501 | NM_005952 | 0010038 // response to metal ion // traceable author statement /// 0036018 // cellular response to erythropoietin // inferred from expression pattern /// 0045926 // negative regulation of growth // inferred from sequence or structural similarity /// 0071276 // cellular response to cadmium ion // inferred from expression pattern /// 0071294 // cellular response to zinc ion // inferred from expression pattern | 0005634 // nucleus // inferred from direct assay /// 0005737 // cytoplasm // inferred from direct assay /// 0048471 // perinuclear region of cytoplasm // inferred from sequence or structural similarity | 0008270 // zinc ion binding // inferred from sequence or structural similarity /// 0046872 // metal ion binding // traceable author statement |
|-------------|-----------|------|--------------|----------|-------------------|---------|---------------------------------------------------------------------------------------------------------------------------------------------------------------------------------------|-----------|--------------------|------|------|-----------|----------------------------------------------------------------------------------------------------------------------------------------------------------------------------------------------------------------------------------------------------------------------------------------------------------------------------------------------------------------------------------------------------------------------------|-----------------------------------------------------------------------------------------------------------------------------------------------------------------------------------------------------------|-----------------------------------------------------------------------------------------------------------------------------------------------|

|           |           |       |              |          |                   |         |                                                                                                                                                                                                                                                 |           |                                  |       |      |                                                                                        |                                                                                                                                                                                                                                                                                                                                                                                                                                                                                                                                                                                                                                                   |                                                                                                                                                                                                                                                                                                                                                               |                                                                                                                                                                                                                                                                                                                                                                                                                                                                                                                                                               |
|-----------|-----------|-------|--------------|----------|-------------------|---------|-------------------------------------------------------------------------------------------------------------------------------------------------------------------------------------------------------------------------------------------------|-----------|----------------------------------|-------|------|----------------------------------------------------------------------------------------|---------------------------------------------------------------------------------------------------------------------------------------------------------------------------------------------------------------------------------------------------------------------------------------------------------------------------------------------------------------------------------------------------------------------------------------------------------------------------------------------------------------------------------------------------------------------------------------------------------------------------------------------------|---------------------------------------------------------------------------------------------------------------------------------------------------------------------------------------------------------------------------------------------------------------------------------------------------------------------------------------------------------------|---------------------------------------------------------------------------------------------------------------------------------------------------------------------------------------------------------------------------------------------------------------------------------------------------------------------------------------------------------------------------------------------------------------------------------------------------------------------------------------------------------------------------------------------------------------|
| 204352_at | NM_004619 | TRAF5 | Homo sapiens | 6-Oct-14 | Exemplar sequence | GenBank | gb:NM_004619.1 /DEF=Homo sapiens TNF receptor-associated factor 5 (TRAF5), mRNA. /FEA=mRNA /GEN=TRAF5 /PROD=TNF receptor-associated factor 5 /DB_XREF=gi:1321602 /UG=Hs.29736 TNF receptor-associated factor 5 /FL=gb:NM_004619.1 gb:AB000509.1 | NM_004619 | TNF receptor-associated factor 5 | TRAF5 | 7188 | NM_001033910<br>/// NM_004619<br>/// NM_145759<br>/// XM_005273249<br>/// XM_006711524 | 0006915 // apoptotic process // inferred from electronic annotation /// 0007165 // signal transduction // inferred from electronic annotation /// 0008284 // positive regulation of cell proliferation // inferred from electronic annotation /// 0016567 // protein ubiquitination // inferred from electronic annotation /// 0042981 // regulation of apoptotic process // inferred from electronic annotation /// 0043123 // positive regulation of I-kappaB kinase/NF-kappaB signaling // inferred from expression pattern /// 0051091 // positive regulation of sequence-specific DNA binding transcription factor activity // inferred from | 0005737 // cytoplasm // inferred from direct assay /// 0005813 // centrosome // inferred from direct assay /// 0005829 // cytosol // inferred from direct assay /// 0009898 // cytoplasmic side of plasma membrane // inferred from sequence or structural similarity /// 0035631 // CD40 receptor complex // inferred from sequence or structural similarity | 0004842 // ubiquitin-protein transferase activity // inferred from electronic annotation /// 0004871 // signal transducer activity // inferred from electronic annotation /// 0005515 // protein binding // inferred from physical interaction /// 0008270 // zinc ion binding // inferred from electronic annotation /// 0031625 // ubiquitin protein ligase binding // inferred from physical interaction /// 0031996 // thioesterase binding // inferred from physical interaction /// 0046872 // metal ion binding // inferred from electronic annotation |
|-----------|-----------|-------|--------------|----------|-------------------|---------|-------------------------------------------------------------------------------------------------------------------------------------------------------------------------------------------------------------------------------------------------|-----------|----------------------------------|-------|------|----------------------------------------------------------------------------------------|---------------------------------------------------------------------------------------------------------------------------------------------------------------------------------------------------------------------------------------------------------------------------------------------------------------------------------------------------------------------------------------------------------------------------------------------------------------------------------------------------------------------------------------------------------------------------------------------------------------------------------------------------|---------------------------------------------------------------------------------------------------------------------------------------------------------------------------------------------------------------------------------------------------------------------------------------------------------------------------------------------------------------|---------------------------------------------------------------------------------------------------------------------------------------------------------------------------------------------------------------------------------------------------------------------------------------------------------------------------------------------------------------------------------------------------------------------------------------------------------------------------------------------------------------------------------------------------------------|

|             |          |       |              |          |                    |         |                                                                                                                                                                                                   |          |                              |       |       |                                                                                                                                                                                                |                                                                                                                                                                                                                                               |                                                                                                                                                                                                                                                                                                                                                                   |                                                                                                                                                                                                               |
|-------------|----------|-------|--------------|----------|--------------------|---------|---------------------------------------------------------------------------------------------------------------------------------------------------------------------------------------------------|----------|------------------------------|-------|-------|------------------------------------------------------------------------------------------------------------------------------------------------------------------------------------------------|-----------------------------------------------------------------------------------------------------------------------------------------------------------------------------------------------------------------------------------------------|-------------------------------------------------------------------------------------------------------------------------------------------------------------------------------------------------------------------------------------------------------------------------------------------------------------------------------------------------------------------|---------------------------------------------------------------------------------------------------------------------------------------------------------------------------------------------------------------|
| 204364_s_at | BE535746 | REEP1 | Homo sapiens | 6-Oct-14 | Consensus sequence | GenBank | Consensus includes<br>gb:BE535746<br>/FEA=EST<br>/DB_XREF=gi:9764391<br>/DB_XREF=est:601060419F1<br>/CLONE=IMAGE:3446788<br>/UG=Hs.7358<br>hypothetical protein<br>FLJ13110<br>/FL=gb:NM_022912.1 | BE535746 | receptor accessory protein 1 | REEP1 | 65055 | NM_001164730<br>///<br>NM_001164731<br>///<br>NM_001164732<br>/// NM_022912<br>///<br>XM_005264502<br>///<br>XM_005264503<br>///<br>XM_005264504<br>///<br>XM_005264505<br>///<br>XM_006712078 | 0008219 // cell death // inferred from electronic annotation /// 0051205 // protein insertion into membrane // inferred from direct assay /// 0071786 // endoplasmic reticulum tubular network organization // inferred from mutant phenotype | 0005737 // cytoplasm // inferred from direct assay /// 0005739 // mitochondrion // inferred from electronic annotation /// 0005783 // endoplasmic reticulum // inferred from direct assay /// 0016020 // membrane // inferred from direct assay /// 0016021 // integral component of membrane // inferred from electronic annotation /// 0031966 // mitochondrial | 0005515 // protein binding // inferred from physical interaction /// 0008017 // microtubule binding // inferred from direct assay /// 0031849 // olfactory receptor binding // inferred from mutant phenotype |
|-------------|----------|-------|--------------|----------|--------------------|---------|---------------------------------------------------------------------------------------------------------------------------------------------------------------------------------------------------|----------|------------------------------|-------|-------|------------------------------------------------------------------------------------------------------------------------------------------------------------------------------------------------|-----------------------------------------------------------------------------------------------------------------------------------------------------------------------------------------------------------------------------------------------|-------------------------------------------------------------------------------------------------------------------------------------------------------------------------------------------------------------------------------------------------------------------------------------------------------------------------------------------------------------------|---------------------------------------------------------------------------------------------------------------------------------------------------------------------------------------------------------------|

|             |           |       |              |          |                   |         |                                                                                                                                                                                                                                |           |                              |       |       |                                                                                                                                                                           |                                                                                                                                                                                                                                               |                                                                                                                                                                                                                                                                                                                                                                                  |                                                                                                                                                                                                                  |
|-------------|-----------|-------|--------------|----------|-------------------|---------|--------------------------------------------------------------------------------------------------------------------------------------------------------------------------------------------------------------------------------|-----------|------------------------------|-------|-------|---------------------------------------------------------------------------------------------------------------------------------------------------------------------------|-----------------------------------------------------------------------------------------------------------------------------------------------------------------------------------------------------------------------------------------------|----------------------------------------------------------------------------------------------------------------------------------------------------------------------------------------------------------------------------------------------------------------------------------------------------------------------------------------------------------------------------------|------------------------------------------------------------------------------------------------------------------------------------------------------------------------------------------------------------------|
| 204365_s_at | NM_022912 | REEP1 | Homo sapiens | 6-Oct-14 | Exemplar sequence | GenBank | gb:NM_022912.1 /DEF=Homo sapiens hypothetical protein FLJ13110 (FLJ13110), mRNA. /FEA=mRNA /GEN=FLJ13110 /PROD=hypothetical protein FLJ13110 /DB_XREF=gi:12597656 /UG=Hs.7358 hypothetical protein FLJ13110 /FL=gb:NM_022912.1 | NM_022912 | receptor accessory protein 1 | REEP1 | 65055 | NM_001164730 ///<br>NM_001164731 ///<br>NM_001164732 ///<br>NM_022912 ///<br>XM_005264502 ///<br>XM_005264503 ///<br>XM_005264504 ///<br>XM_005264505 ///<br>XM_006712078 | 0008219 // cell death // inferred from electronic annotation /// 0051205 // protein insertion into membrane // inferred from direct assay /// 0071786 // endoplasmic reticulum tubular network organization // inferred from mutant phenotype | 0005737 // cytoplasm // inferred from direct assay ///<br>0005739 // mitochondrion // inferred from electronic annotation ///<br>0005783 // endoplasmic reticulum // inferred from direct assay ///<br>0016020 // membrane // inferred from direct assay ///<br>0016021 // integral component of membrane // inferred from electronic annotation ///<br>0031966 // mitochondrial | 0005515 // protein binding // inferred from physical interaction /// 0008017 // microtubule binding // inferred from direct assay ///<br>0031849 // olfactory receptor binding // inferred from mutant phenotype |
|-------------|-----------|-------|--------------|----------|-------------------|---------|--------------------------------------------------------------------------------------------------------------------------------------------------------------------------------------------------------------------------------|-----------|------------------------------|-------|-------|---------------------------------------------------------------------------------------------------------------------------------------------------------------------------|-----------------------------------------------------------------------------------------------------------------------------------------------------------------------------------------------------------------------------------------------|----------------------------------------------------------------------------------------------------------------------------------------------------------------------------------------------------------------------------------------------------------------------------------------------------------------------------------------------------------------------------------|------------------------------------------------------------------------------------------------------------------------------------------------------------------------------------------------------------------|

|           |           |       |              |          |                   |         |                                                                                                                                                                                                                       |           |                             |       |      |                                                                                                                                                                                                                            |                                                                                                                                                                                                                                                                                                                                                                                                                                                                                                                                                                                                                                                |                                                                                                                                                                                |                                                                                                                                                                                                                                                                                                                                                                                                                                                                                                                                                                                                                    |
|-----------|-----------|-------|--------------|----------|-------------------|---------|-----------------------------------------------------------------------------------------------------------------------------------------------------------------------------------------------------------------------|-----------|-----------------------------|-------|------|----------------------------------------------------------------------------------------------------------------------------------------------------------------------------------------------------------------------------|------------------------------------------------------------------------------------------------------------------------------------------------------------------------------------------------------------------------------------------------------------------------------------------------------------------------------------------------------------------------------------------------------------------------------------------------------------------------------------------------------------------------------------------------------------------------------------------------------------------------------------------------|--------------------------------------------------------------------------------------------------------------------------------------------------------------------------------|--------------------------------------------------------------------------------------------------------------------------------------------------------------------------------------------------------------------------------------------------------------------------------------------------------------------------------------------------------------------------------------------------------------------------------------------------------------------------------------------------------------------------------------------------------------------------------------------------------------------|
| 204376_at | NM_014703 | VPRBP | Homo sapiens | 6-Oct-14 | Exemplar sequence | GenBank | gb:NM_014703.1 /DEF=Homo sapiens KIAA0800 gene product (KIAA0800), mRNA. /FEA=mRNA /GEN=KIAA0800 /PROD=KIAA0800 gene product /DB_XREF=gi:7662315 /UG=Hs.118738 KIAA0800 gene product /FL=gb:AB018343.1 gb:NM_014703.1 | NM_014703 | Vpr (HIV-1) binding protein | VPRBP | 9730 | NM_001171904 /// NM_014703 /// XM_005276751 /// XM_005276752 /// XM_005276753 /// XM_005276754 /// XM_005276755 /// XM_006713426 /// XM_006713427 /// XM_006713428 /// XR_254197 /// XR_254198 /// XR_427298 /// XR_427299 | 0000122 // negative regulation of transcription from RNA polymerase II promoter // inferred from direct assay /// 0006351 // transcription, DNA-templated // inferred from electronic annotation /// 0006355 // regulation of transcription, DNA-templated // inferred from electronic annotation /// 0016032 // viral process // inferred from electronic annotation /// 0016310 // phosphorylation // inferred from electronic annotation /// 0016567 // protein ubiquitination // inferred from electronic annotation /// 0016568 // chromatin modification // inferred from electronic annotation /// 0030183 // B cell differentiation // | 0005634 // nucleus // inferred from direct assay /// 0005737 // cytoplasm // inferred from electronic annotation /// 0008180 // COP9 signalosome // inferred from direct assay | 0000166 // nucleotide binding // inferred from electronic annotation /// 0004674 // protein serine/threonine kinase activity // inferred from electronic annotation /// 0005488 // binding // inferred from electronic annotation /// 0005515 // protein binding // inferred from physical interaction /// 0005524 // ATP binding // inferred from electronic annotation /// 0016301 // kinase activity // inferred from electronic annotation /// 0016740 // transferase activity // inferred from electronic annotation /// 1990244 // histone kinase activity (H2A-T120 specific) // inferred from direct assay |
|-----------|-----------|-------|--------------|----------|-------------------|---------|-----------------------------------------------------------------------------------------------------------------------------------------------------------------------------------------------------------------------|-----------|-----------------------------|-------|------|----------------------------------------------------------------------------------------------------------------------------------------------------------------------------------------------------------------------------|------------------------------------------------------------------------------------------------------------------------------------------------------------------------------------------------------------------------------------------------------------------------------------------------------------------------------------------------------------------------------------------------------------------------------------------------------------------------------------------------------------------------------------------------------------------------------------------------------------------------------------------------|--------------------------------------------------------------------------------------------------------------------------------------------------------------------------------|--------------------------------------------------------------------------------------------------------------------------------------------------------------------------------------------------------------------------------------------------------------------------------------------------------------------------------------------------------------------------------------------------------------------------------------------------------------------------------------------------------------------------------------------------------------------------------------------------------------------|

|             |           |       |              |          |                   |         |                                                                                                                                                                                                                       |           |                             |       |      |                                                                                                                                                                                                                            |                                                                                                                                                                                                                                                                                                                                                                                                                                                                                                                                                                                                                                                |                                                                                                                                                                                |                                                                                                                                                                                                                                                                                                                                                                                                                                                                                                                                                                                                                    |
|-------------|-----------|-------|--------------|----------|-------------------|---------|-----------------------------------------------------------------------------------------------------------------------------------------------------------------------------------------------------------------------|-----------|-----------------------------|-------|------|----------------------------------------------------------------------------------------------------------------------------------------------------------------------------------------------------------------------------|------------------------------------------------------------------------------------------------------------------------------------------------------------------------------------------------------------------------------------------------------------------------------------------------------------------------------------------------------------------------------------------------------------------------------------------------------------------------------------------------------------------------------------------------------------------------------------------------------------------------------------------------|--------------------------------------------------------------------------------------------------------------------------------------------------------------------------------|--------------------------------------------------------------------------------------------------------------------------------------------------------------------------------------------------------------------------------------------------------------------------------------------------------------------------------------------------------------------------------------------------------------------------------------------------------------------------------------------------------------------------------------------------------------------------------------------------------------------|
| 204377_s_at | NM_014703 | VPRBP | Homo sapiens | 6-Oct-14 | Exemplar sequence | GenBank | gb:NM_014703.1 /DEF=Homo sapiens KIAA0800 gene product (KIAA0800), mRNA. /FEA=mRNA /GEN=KIAA0800 /PROD=KIAA0800 gene product /DB_XREF=gi:7662315 /UG=Hs.118738 KIAA0800 gene product /FL=gb:AB018343.1 gb:NM_014703.1 | NM_014703 | Vpr (HIV-1) binding protein | VPRBP | 9730 | NM_001171904 /// NM_014703 /// XM_005276751 /// XM_005276752 /// XM_005276753 /// XM_005276754 /// XM_005276755 /// XM_006713426 /// XM_006713427 /// XM_006713428 /// XR_254197 /// XR_254198 /// XR_427298 /// XR_427299 | 0000122 // negative regulation of transcription from RNA polymerase II promoter // inferred from direct assay /// 0006351 // transcription, DNA-templated // inferred from electronic annotation /// 0006355 // regulation of transcription, DNA-templated // inferred from electronic annotation /// 0016032 // viral process // inferred from electronic annotation /// 0016310 // phosphorylation // inferred from electronic annotation /// 0016567 // protein ubiquitination // inferred from electronic annotation /// 0016568 // chromatin modification // inferred from electronic annotation /// 0030183 // B cell differentiation // | 0005634 // nucleus // inferred from direct assay /// 0005737 // cytoplasm // inferred from electronic annotation /// 0008180 // COP9 signalosome // inferred from direct assay | 0000166 // nucleotide binding // inferred from electronic annotation /// 0004674 // protein serine/threonine kinase activity // inferred from electronic annotation /// 0005488 // binding // inferred from electronic annotation /// 0005515 // protein binding // inferred from physical interaction /// 0005524 // ATP binding // inferred from electronic annotation /// 0016301 // kinase activity // inferred from electronic annotation /// 0016740 // transferase activity // inferred from electronic annotation /// 1990244 // histone kinase activity (H2A-T120 specific) // inferred from direct assay |
|-------------|-----------|-------|--------------|----------|-------------------|---------|-----------------------------------------------------------------------------------------------------------------------------------------------------------------------------------------------------------------------|-----------|-----------------------------|-------|------|----------------------------------------------------------------------------------------------------------------------------------------------------------------------------------------------------------------------------|------------------------------------------------------------------------------------------------------------------------------------------------------------------------------------------------------------------------------------------------------------------------------------------------------------------------------------------------------------------------------------------------------------------------------------------------------------------------------------------------------------------------------------------------------------------------------------------------------------------------------------------------|--------------------------------------------------------------------------------------------------------------------------------------------------------------------------------|--------------------------------------------------------------------------------------------------------------------------------------------------------------------------------------------------------------------------------------------------------------------------------------------------------------------------------------------------------------------------------------------------------------------------------------------------------------------------------------------------------------------------------------------------------------------------------------------------------------------|

|           |           |      |              |          |                   |         |                                                                                                                                                                                                             |           |                      |      |      |                                                                                                                                                                 |                                                                                                                                     |                                                                                                                                                                                                                                                                                                                                                                             |                                                                       |
|-----------|-----------|------|--------------|----------|-------------------|---------|-------------------------------------------------------------------------------------------------------------------------------------------------------------------------------------------------------------|-----------|----------------------|------|------|-----------------------------------------------------------------------------------------------------------------------------------------------------------------|-------------------------------------------------------------------------------------------------------------------------------------|-----------------------------------------------------------------------------------------------------------------------------------------------------------------------------------------------------------------------------------------------------------------------------------------------------------------------------------------------------------------------------|-----------------------------------------------------------------------|
| 204688_at | NM_003919 | SGCE | Homo sapiens | 6-Oct-14 | Exemplar sequence | GenBank | gb:NM_003919.1 /DEF=Homo sapiens sarcoglycan, epsilon (SGCE), mRNA. /FEA=mRNA /GEN=SGCE /PROD=sarcoglycan, epsilon /DB_XREF=gi:10835046 /UG=Hs.110708 sarcoglycan, epsilon /FL=gb:NM_003919.1 gb:AF036364.1 | NM_003919 | sarcoglycan, epsilon | SGCE | 8910 | NM_001099400 /// NM_001099401 /// NM_003919 /// XM_005250675 /// XM_005250677 /// XM_005250679 /// XM_006716165 /// XM_006716166 /// XM_006716167 /// XR_428187 | 0007160 // cell-matrix adhesion // traceable author statement /// 0007517 // muscle organ development // traceable author statement | 0005737 // cytoplasm // inferred from electronic annotation /// 0005794 // Golgi apparatus // inferred from sequence or structural similarity /// 0005856 // cytoskeleton // inferred from electronic annotation /// 0005886 // plasma membrane // inferred from sequence or structural similarity /// 0005887 // integral component of plasma membrane // traceable author | 0005509 // calcium ion binding // inferred from electronic annotation |
|-----------|-----------|------|--------------|----------|-------------------|---------|-------------------------------------------------------------------------------------------------------------------------------------------------------------------------------------------------------------|-----------|----------------------|------|------|-----------------------------------------------------------------------------------------------------------------------------------------------------------------|-------------------------------------------------------------------------------------------------------------------------------------|-----------------------------------------------------------------------------------------------------------------------------------------------------------------------------------------------------------------------------------------------------------------------------------------------------------------------------------------------------------------------------|-----------------------------------------------------------------------|



|           |           |       |              |          |                   |         |                                                                                                                                                                                                                                                                                                                    |           |                                                             |       |      |                                                                       |                                                                                                                                                                                                                                                                                                                                                                                                                                                                                                                                                                                                                               |                                                                                                                                                                    |                                                                                                                                                 |
|-----------|-----------|-------|--------------|----------|-------------------|---------|--------------------------------------------------------------------------------------------------------------------------------------------------------------------------------------------------------------------------------------------------------------------------------------------------------------------|-----------|-------------------------------------------------------------|-------|------|-----------------------------------------------------------------------|-------------------------------------------------------------------------------------------------------------------------------------------------------------------------------------------------------------------------------------------------------------------------------------------------------------------------------------------------------------------------------------------------------------------------------------------------------------------------------------------------------------------------------------------------------------------------------------------------------------------------------|--------------------------------------------------------------------------------------------------------------------------------------------------------------------|-------------------------------------------------------------------------------------------------------------------------------------------------|
| 204747_at | NM_001549 | IFIT3 | Homo sapiens | 6-Oct-14 | Exemplar sequence | GenBank | gb:NM_001549.1 /DEF=Homo sapiens interferon-induced protein with tetratricopeptide repeats 4 (IFIT4), mRNA. /FEA=mRNA /GEN=IFIT4 /PROD=interferon-induced protein with tetratricopeptide repeats 4 /DB_XREF=gi:4504586 /UG=Hs.181874 interferon-induced protein with tetratricopeptide repeats 4 /FL=gb:BC001383.1 | NM_001549 | interferon-induced protein with tetratricopeptide repeats 3 | IFIT3 | 3437 | NM_001031683 ///<br>NM_001289758 ///<br>NM_001289759 ///<br>NM_001549 | 0002376 // immune system process // inferred from electronic annotation /// 0008285 // negative regulation of cell proliferation // inferred from direct assay /// 0009615 // response to virus // inferred from mutant phenotype /// 0019221 // cytokine-mediated signaling pathway // traceable author statement /// 0035457 // cellular response to interferon-alpha // inferred from electronic annotation /// 0043066 // negative regulation of apoptotic process // inferred from direct assay /// 0045087 // innate immune response // inferred from electronic annotation /// 0051607 // defense response to virus // | 0005737 // cytoplasm // inferred from direct assay /// 0005739 // mitochondrion // inferred from direct assay /// 0005829 // cytosol // traceable author statement | 0005515 // protein binding // inferred from physical interaction /// 0042802 // identical protein binding // inferred from physical interaction |
|-----------|-----------|-------|--------------|----------|-------------------|---------|--------------------------------------------------------------------------------------------------------------------------------------------------------------------------------------------------------------------------------------------------------------------------------------------------------------------|-----------|-------------------------------------------------------------|-------|------|-----------------------------------------------------------------------|-------------------------------------------------------------------------------------------------------------------------------------------------------------------------------------------------------------------------------------------------------------------------------------------------------------------------------------------------------------------------------------------------------------------------------------------------------------------------------------------------------------------------------------------------------------------------------------------------------------------------------|--------------------------------------------------------------------------------------------------------------------------------------------------------------------|-------------------------------------------------------------------------------------------------------------------------------------------------|

|           |           |       |              |          |                   |         |                                                                                                                                                                                                                                                                                                      |           |                                                                                       |       |      |           |                                                                                                                                                                                                                                                                                                                                                                                                                                                                                                                                                                                                                                                            |                                                                                                                                                                                                                                                                                                                                                                      |                                                                                                                                                                                                                                                                                                                                                                                                                                                                                                                                                                                                                                                                                                                               |
|-----------|-----------|-------|--------------|----------|-------------------|---------|------------------------------------------------------------------------------------------------------------------------------------------------------------------------------------------------------------------------------------------------------------------------------------------------------|-----------|---------------------------------------------------------------------------------------|-------|------|-----------|------------------------------------------------------------------------------------------------------------------------------------------------------------------------------------------------------------------------------------------------------------------------------------------------------------------------------------------------------------------------------------------------------------------------------------------------------------------------------------------------------------------------------------------------------------------------------------------------------------------------------------------------------------|----------------------------------------------------------------------------------------------------------------------------------------------------------------------------------------------------------------------------------------------------------------------------------------------------------------------------------------------------------------------|-------------------------------------------------------------------------------------------------------------------------------------------------------------------------------------------------------------------------------------------------------------------------------------------------------------------------------------------------------------------------------------------------------------------------------------------------------------------------------------------------------------------------------------------------------------------------------------------------------------------------------------------------------------------------------------------------------------------------------|
| 204748_at | NM_000963 | PTGS2 | Homo sapiens | 6-Oct-14 | Exemplar sequence | GenBank | gb:NM_000963.1 /DEF=Homo sapiens prostaglandin-endoperoxide synthase 2 (prostaglandin GH synthase and cyclooxygenase) (PTGS2), mRNA. /FEA=mRNA /GEN=PTGS2 /PROD=prostaglandin-endoperoxide synthase 2(prostaglandin GH synthase and cyclooxygenase) /DB_XREF=gi:4506264 /UG=Hs.196384 prostaglandin- | NM_000963 | prostaglandin-endoperoxide synthase 2 (prostaglandin G/H synthase and cyclooxygenase) | PTGS2 | 5743 | NM_000963 | 0001516 // prostaglandin biosynthetic process // inferred from sequence or structural similarity /// 0001516 // prostaglandin biosynthetic process // non-traceable author statement /// 0001525 // angiogenesis // inferred from electronic annotation /// 0006629 // lipid metabolic process // inferred from electronic annotation /// 0006631 // fatty acid metabolic process // inferred from electronic annotation /// 0006633 // fatty acid biosynthetic process // inferred from electronic annotation /// 0006693 // prostaglandin metabolic process // traceable author statement /// 0006928 // cellular component movement // traceable author | 0005634 // nucleus // inferred from sequence or structural similarity /// 0005737 // cytoplasm // inferred from direct assay /// 0005737 // cytoplasm // inferred from sequence or structural similarity /// 0005783 // endoplasmic reticulum // inferred from electronic annotation /// 0005789 // endoplasmic reticulum membrane // traceable author statement /// | 0004601 // peroxidase activity // non-traceable author statement /// 0004666 // prostaglandin-endoperoxide synthase activity // inferred from direct assay /// 0005515 // protein binding // inferred from electronic annotation /// 0008289 // lipid binding // inferred from electronic annotation /// 0016491 // oxidoreductase activity // inferred from electronic annotation /// 0016702 // oxidoreductase activity, acting on single donors with incorporation of molecular oxygen, incorporation of two atoms of oxygen // inferred from electronic annotation /// 0019899 // enzyme binding // inferred from physical interaction /// 0020037 // heme binding // inferred from sequence or structural similarity /// |
|-----------|-----------|-------|--------------|----------|-------------------|---------|------------------------------------------------------------------------------------------------------------------------------------------------------------------------------------------------------------------------------------------------------------------------------------------------------|-----------|---------------------------------------------------------------------------------------|-------|------|-----------|------------------------------------------------------------------------------------------------------------------------------------------------------------------------------------------------------------------------------------------------------------------------------------------------------------------------------------------------------------------------------------------------------------------------------------------------------------------------------------------------------------------------------------------------------------------------------------------------------------------------------------------------------------|----------------------------------------------------------------------------------------------------------------------------------------------------------------------------------------------------------------------------------------------------------------------------------------------------------------------------------------------------------------------|-------------------------------------------------------------------------------------------------------------------------------------------------------------------------------------------------------------------------------------------------------------------------------------------------------------------------------------------------------------------------------------------------------------------------------------------------------------------------------------------------------------------------------------------------------------------------------------------------------------------------------------------------------------------------------------------------------------------------------|

|           |           |     |              |          |                   |         |                                                                                                                                                                                                                                                                                                         |           |                                                   |     |      |                                                                                                                                                                           |                                                                                                                                                                                                                                                                                                                                                                                                                                                                                                                                                                                                                                       |                                                                                                                              |                                                                                                                                                                                                                                                                                                                                                                                                                                                                                                                                                                                                                                                                           |
|-----------|-----------|-----|--------------|----------|-------------------|---------|---------------------------------------------------------------------------------------------------------------------------------------------------------------------------------------------------------------------------------------------------------------------------------------------------------|-----------|---------------------------------------------------|-----|------|---------------------------------------------------------------------------------------------------------------------------------------------------------------------------|---------------------------------------------------------------------------------------------------------------------------------------------------------------------------------------------------------------------------------------------------------------------------------------------------------------------------------------------------------------------------------------------------------------------------------------------------------------------------------------------------------------------------------------------------------------------------------------------------------------------------------------|------------------------------------------------------------------------------------------------------------------------------|---------------------------------------------------------------------------------------------------------------------------------------------------------------------------------------------------------------------------------------------------------------------------------------------------------------------------------------------------------------------------------------------------------------------------------------------------------------------------------------------------------------------------------------------------------------------------------------------------------------------------------------------------------------------------|
| 204798_at | NM_005375 | MYB | Homo sapiens | 6-Oct-14 | Exemplar sequence | GenBank | gb:NM_005375.1 /DEF=Homo sapiens v-myb avian myeloblastosis viral oncogene homolog (MYB), mRNA. /FEA=mRNA /GEN=MYB /PROD=v-myb avian myeloblastosis viral oncogene homolog /DB_XREF=gi:4885496 /UG=Hs.1334 v-myb avian myeloblastosis viral oncogene homolog /FL=gb:M15024.1 gb:AF104863.1 gb:NM_005375 | NM_005375 | v-myb avian myeloblastosis viral oncogene homolog | MYB | 4602 | NM_001130172 ///<br>NM_001130173 ///<br>NM_001161656 ///<br>NM_001161657 ///<br>NM_001161658 ///<br>NM_001161659 ///<br>NM_001161660 ///<br>NM_005375 ///<br>XM_006715495 | 0000082 // G1/S transition of mitotic cell cycle // inferred from electronic annotation ///<br>0000122 // negative regulation of transcription from RNA polymerase II promoter // inferred from mutant phenotype ///<br>0001701 // in utero embryonic development // inferred from electronic annotation ///<br>0006260 // DNA replication // inferred from electronic annotation ///<br>0006338 // chromatin remodeling // inferred from mutant phenotype ///<br>0006351 // transcription, DNA-templated // inferred from electronic annotation ///<br>0006355 // regulation of transcription, DNA-templated // non-traceable author | 0005634 // nucleus // inferred from electronic annotation ///<br>0016363 // nuclear matrix // non-traceable author statement | 0000978 // RNA polymerase II core promoter proximal region sequence-specific DNA binding // inferred from direct assay ///<br>0001077 // RNA polymerase II core promoter proximal region sequence-specific DNA binding transcription factor activity involved in positive regulation of transcription // inferred by curator ///<br>0003677 // DNA binding // inferred from electronic annotation ///<br>0003682 // chromatin binding // inferred from electronic annotation ///<br>0003700 // sequence-specific DNA binding transcription factor activity // inferred from electronic annotation ///<br>0005515 // protein binding // inferred from physical interaction |
|-----------|-----------|-----|--------------|----------|-------------------|---------|---------------------------------------------------------------------------------------------------------------------------------------------------------------------------------------------------------------------------------------------------------------------------------------------------------|-----------|---------------------------------------------------|-----|------|---------------------------------------------------------------------------------------------------------------------------------------------------------------------------|---------------------------------------------------------------------------------------------------------------------------------------------------------------------------------------------------------------------------------------------------------------------------------------------------------------------------------------------------------------------------------------------------------------------------------------------------------------------------------------------------------------------------------------------------------------------------------------------------------------------------------------|------------------------------------------------------------------------------------------------------------------------------|---------------------------------------------------------------------------------------------------------------------------------------------------------------------------------------------------------------------------------------------------------------------------------------------------------------------------------------------------------------------------------------------------------------------------------------------------------------------------------------------------------------------------------------------------------------------------------------------------------------------------------------------------------------------------|

|           |           |      |              |          |                   |         |                                                                                                                                                                                                                                                                           |           |                                             |      |      |                                                |                                                                                                                                                                                                                                                                                                                                                                                                                                                                                                                                                                                                                                                                |                                                                                                                                                                                                                                                                                                                                                                                            |                                                                                                                                                                                                                                                                                                                                                                                                                                                                                                                                                                                                                                                                                                   |
|-----------|-----------|------|--------------|----------|-------------------|---------|---------------------------------------------------------------------------------------------------------------------------------------------------------------------------------------------------------------------------------------------------------------------------|-----------|---------------------------------------------|------|------|------------------------------------------------|----------------------------------------------------------------------------------------------------------------------------------------------------------------------------------------------------------------------------------------------------------------------------------------------------------------------------------------------------------------------------------------------------------------------------------------------------------------------------------------------------------------------------------------------------------------------------------------------------------------------------------------------------------------|--------------------------------------------------------------------------------------------------------------------------------------------------------------------------------------------------------------------------------------------------------------------------------------------------------------------------------------------------------------------------------------------|---------------------------------------------------------------------------------------------------------------------------------------------------------------------------------------------------------------------------------------------------------------------------------------------------------------------------------------------------------------------------------------------------------------------------------------------------------------------------------------------------------------------------------------------------------------------------------------------------------------------------------------------------------------------------------------------------|
| 204972_at | NM_016817 | OAS2 | Homo sapiens | 6-Oct-14 | Exemplar sequence | GenBank | gb:NM_016817.1 /DEF=Homo sapiens 2-5oligoadenylate synthetase 2 (OAS2), transcript variant 1, mRNA. /FEA=mRNA /GEN=OAS2 /PROD=2-5oligoadenylate synthetase 2, isoform p71 /DB_XREF=gi:8051624 /UG=Hs.264981 2-5oligoadenylate synthetase 2 /FL=gb:M87434.1 gb:NM_016817.1 | NM_016817 | 2'-5'-oligoadenylate synthetase 2, 69/71kDa | OAS2 | 4939 | NM_001032731<br>/// NM_002535<br>/// NM_016817 | 0002376 // immune system process // inferred from electronic annotation /// 0006139 // nucleobase-containing compound metabolic process // traceable author statement /// 0006164 // purine nucleotide biosynthetic process // inferred from direct assay /// 0006401 // RNA catabolic process // inferred from electronic annotation /// 0006486 // protein glycosylation // inferred from direct assay /// 0006955 // immune response // inferred from electronic annotation /// 0008152 // metabolic process // inferred from electronic annotation /// 0009615 // response to virus // traceable author statement /// 0018377 // protein myristoylation // | 0005634 // nucleus // inferred from electronic annotation /// 0005737 // cytoplasm // inferred from direct assay /// 0005739 // mitochondrion // inferred from electronic annotation /// 0005783 // endoplasmic reticulum // inferred from electronic annotation /// 0005829 // cytosol // traceable author statement /// 0016020 // membrane // traceable author statement /// 0043231 // | 0000166 // nucleotide binding // inferred from electronic annotation /// 0001730 // 2'-5'-oligoadenylate synthetase activity // inferred from direct assay /// 0001730 // 2'-5'-oligoadenylate synthetase activity // inferred from mutant phenotype /// 0003723 // RNA binding // inferred from electronic annotation /// 0003725 // double-stranded RNA binding // inferred from direct assay /// 0003725 // double-stranded RNA binding // inferred from mutant phenotype /// 0005524 // ATP binding // inferred from mutant phenotype /// 0008270 // zinc ion binding // inferred from direct assay /// 0016740 // transferase activity // inferred from electronic annotation /// 0016779 // |
|-----------|-----------|------|--------------|----------|-------------------|---------|---------------------------------------------------------------------------------------------------------------------------------------------------------------------------------------------------------------------------------------------------------------------------|-----------|---------------------------------------------|------|------|------------------------------------------------|----------------------------------------------------------------------------------------------------------------------------------------------------------------------------------------------------------------------------------------------------------------------------------------------------------------------------------------------------------------------------------------------------------------------------------------------------------------------------------------------------------------------------------------------------------------------------------------------------------------------------------------------------------------|--------------------------------------------------------------------------------------------------------------------------------------------------------------------------------------------------------------------------------------------------------------------------------------------------------------------------------------------------------------------------------------------|---------------------------------------------------------------------------------------------------------------------------------------------------------------------------------------------------------------------------------------------------------------------------------------------------------------------------------------------------------------------------------------------------------------------------------------------------------------------------------------------------------------------------------------------------------------------------------------------------------------------------------------------------------------------------------------------------|

|           |           |       |              |          |                   |         |                                                                                                                                                                                                                                                                                                                                    |           |                                                 |       |      |                                                                               |                                                                                                                                                 |                                                                                                                                                                                 |                                                                                                                                                                                                                                                                                                                                                                                                                                                                                                                                                                                              |
|-----------|-----------|-------|--------------|----------|-------------------|---------|------------------------------------------------------------------------------------------------------------------------------------------------------------------------------------------------------------------------------------------------------------------------------------------------------------------------------------|-----------|-------------------------------------------------|-------|------|-------------------------------------------------------------------------------|-------------------------------------------------------------------------------------------------------------------------------------------------|---------------------------------------------------------------------------------------------------------------------------------------------------------------------------------|----------------------------------------------------------------------------------------------------------------------------------------------------------------------------------------------------------------------------------------------------------------------------------------------------------------------------------------------------------------------------------------------------------------------------------------------------------------------------------------------------------------------------------------------------------------------------------------------|
| 205000_at | NM_004660 | DDX3Y | Homo sapiens | 6-Oct-14 | Exemplar sequence | GenBank | gb:NM_004660.2 /DEF=Homo sapiens DEADH (Asp-Glu-Ala-AspHis) box polypeptide, Y chromosome (DBY), mRNA. /FEA=mRNA /GEN=DBY /PROD=DEADH (Asp-Glu-Ala-AspHis) box polypeptide, Y chromosome /DB_XREF=gi:13514808 /UG=Hs.99120 DEADH (Asp-Glu-Ala-AspHis) box polypeptide, Y chromosome /FL=gb:NM_004660.2 gb:AF000984.1 gb:AF000985.1 | NM_004660 | DEAD (Asp-Glu-Ala-Asp) box helicase 3, Y-linked | DDX3Y | 8653 | NM_001122665 /// NM_004660 /// XM_005262564 /// XM_006724877 /// XM_006724878 | 0006200 // ATP catabolic process // inferred from electronic annotation /// 0008152 // metabolic process // inferred from electronic annotation | 0005634 // nucleus // inferred from electronic annotation /// 0005737 // cytoplasm // inferred from electronic annotation /// 0016020 // membrane // inferred from direct assay | 0000166 // nucleotide binding // inferred from electronic annotation /// 0003676 // nucleic acid binding // inferred from electronic annotation /// 0003677 // DNA binding // inferred from electronic annotation /// 0003723 // RNA binding // inferred from electronic annotation /// 0004386 // helicase activity // inferred from electronic annotation /// 0005524 // ATP binding // inferred from electronic annotation /// 0008026 // ATP-dependent helicase activity // inferred from electronic annotation /// 0016787 // hydrolase activity // inferred from electronic annotation |
|-----------|-----------|-------|--------------|----------|-------------------|---------|------------------------------------------------------------------------------------------------------------------------------------------------------------------------------------------------------------------------------------------------------------------------------------------------------------------------------------|-----------|-------------------------------------------------|-------|------|-------------------------------------------------------------------------------|-------------------------------------------------------------------------------------------------------------------------------------------------|---------------------------------------------------------------------------------------------------------------------------------------------------------------------------------|----------------------------------------------------------------------------------------------------------------------------------------------------------------------------------------------------------------------------------------------------------------------------------------------------------------------------------------------------------------------------------------------------------------------------------------------------------------------------------------------------------------------------------------------------------------------------------------------|

|             |          |       |              |          |                   |         |                                                                                                                                                                                                                                                                                               |          |                                                 |       |      |                                                                               |                                                                                                                                                 |                                                                                                                                                                                 |                                                                                                                                                                                                                                                                                                                                                                                                                                                                                                                                                                                              |
|-------------|----------|-------|--------------|----------|-------------------|---------|-----------------------------------------------------------------------------------------------------------------------------------------------------------------------------------------------------------------------------------------------------------------------------------------------|----------|-------------------------------------------------|-------|------|-------------------------------------------------------------------------------|-------------------------------------------------------------------------------------------------------------------------------------------------|---------------------------------------------------------------------------------------------------------------------------------------------------------------------------------|----------------------------------------------------------------------------------------------------------------------------------------------------------------------------------------------------------------------------------------------------------------------------------------------------------------------------------------------------------------------------------------------------------------------------------------------------------------------------------------------------------------------------------------------------------------------------------------------|
| 205001_s_at | AF000985 | DDX3Y | Homo sapiens | 6-Oct-14 | Exemplar sequence | GenBank | gb:AF000985.1 /DEF=Homo sapiens dead box, Y isoform (DBY) mRNA, alternative transcript 1, complete cds. /FEA=mRNA /GEN=DBY /PROD=dead box, Y isoform /DB_XREF=gi:2580555 /UG=Hs.99120 DEADH (Asp-Glu-Ala-AspHis) box polypeptide, Y chromosome /FL=gb:NM_004660.2 gb:AF000984.1 gb:AF000985.1 | AF000985 | DEAD (Asp-Glu-Ala-Asp) box helicase 3, Y-linked | DDX3Y | 8653 | NM_001122665 /// NM_004660 /// XM_005262564 /// XM_006724877 /// XM_006724878 | 0006200 // ATP catabolic process // inferred from electronic annotation /// 0008152 // metabolic process // inferred from electronic annotation | 0005634 // nucleus // inferred from electronic annotation /// 0005737 // cytoplasm // inferred from electronic annotation /// 0016020 // membrane // inferred from direct assay | 0000166 // nucleotide binding // inferred from electronic annotation /// 0003676 // nucleic acid binding // inferred from electronic annotation /// 0003677 // DNA binding // inferred from electronic annotation /// 0003723 // RNA binding // inferred from electronic annotation /// 0004386 // helicase activity // inferred from electronic annotation /// 0005524 // ATP binding // inferred from electronic annotation /// 0008026 // ATP-dependent helicase activity // inferred from electronic annotation /// 0016787 // hydrolase activity // inferred from electronic annotation |
|-------------|----------|-------|--------------|----------|-------------------|---------|-----------------------------------------------------------------------------------------------------------------------------------------------------------------------------------------------------------------------------------------------------------------------------------------------|----------|-------------------------------------------------|-------|------|-------------------------------------------------------------------------------|-------------------------------------------------------------------------------------------------------------------------------------------------|---------------------------------------------------------------------------------------------------------------------------------------------------------------------------------|----------------------------------------------------------------------------------------------------------------------------------------------------------------------------------------------------------------------------------------------------------------------------------------------------------------------------------------------------------------------------------------------------------------------------------------------------------------------------------------------------------------------------------------------------------------------------------------------|

|             |           |      |              |          |                   |         |                                                                                                                                                                                                                                                                 |           |                                   |      |      |                                                      |                                                                                                                                                   |                                                                                                                                                                                                                                                                                                                                                  |                                                                                                                                                                                                                                                                                                            |
|-------------|-----------|------|--------------|----------|-------------------|---------|-----------------------------------------------------------------------------------------------------------------------------------------------------------------------------------------------------------------------------------------------------------------|-----------|-----------------------------------|------|------|------------------------------------------------------|---------------------------------------------------------------------------------------------------------------------------------------------------|--------------------------------------------------------------------------------------------------------------------------------------------------------------------------------------------------------------------------------------------------------------------------------------------------------------------------------------------------|------------------------------------------------------------------------------------------------------------------------------------------------------------------------------------------------------------------------------------------------------------------------------------------------------------|
| 205012_s_at | NM_005326 | HAGH | Homo sapiens | 6-Oct-14 | Exemplar sequence | GenBank | gb:NM_005326.1 /DEF=Homo sapiens hydroxyacyl glutathione hydrolase (HAGH), mRNA. /FEA=mRNA /GEN=HAGH /PROD=hydroxyacyl glutathione hydrolase /DB_XREF=gi:4885388 /UG=Hs.155482 hydroxyacyl glutathione hydrolase /FL=gb:BC000840.1 gb:BC002627.1 gb:NM_005326.1 | NM_005326 | hydroxyacyl glutathione hydrolase | HAGH | 3029 | NM_001040427<br>///<br>NM_001286249<br>/// NM_005326 | 0006750 // glutathione biosynthetic process // inferred from direct assay /// 0008152 // metabolic process // inferred from electronic annotation | 0005737 // cytoplasm // inferred from direct assay /// 0005739 // mitochondrion // inferred from electronic annotation /// 0005759 // mitochondrial matrix // inferred from direct assay /// 0005759 // mitochondrial matrix // inferred from electronic annotation /// 0070062 // extracellular vesicular exosome // inferred from direct assay | 0004416 // hydroxyacylglutathione hydrolase activity // inferred from direct assay /// 0008270 // zinc ion binding // inferred from electronic annotation /// 0016787 // hydrolase activity // inferred from electronic annotation /// 0046872 // metal ion binding // inferred from electronic annotation |
|-------------|-----------|------|--------------|----------|-------------------|---------|-----------------------------------------------------------------------------------------------------------------------------------------------------------------------------------------------------------------------------------------------------------------|-----------|-----------------------------------|------|------|------------------------------------------------------|---------------------------------------------------------------------------------------------------------------------------------------------------|--------------------------------------------------------------------------------------------------------------------------------------------------------------------------------------------------------------------------------------------------------------------------------------------------------------------------------------------------|------------------------------------------------------------------------------------------------------------------------------------------------------------------------------------------------------------------------------------------------------------------------------------------------------------|

|             |           |      |              |          |                   |         |                                                                                                                                                                                            |           |                                 |               |               |                         |                                                                                                                                                                                                                                                                                                     |                                                                                                                                                                                                                                                                                  |                                                                  |
|-------------|-----------|------|--------------|----------|-------------------|---------|--------------------------------------------------------------------------------------------------------------------------------------------------------------------------------------------|-----------|---------------------------------|---------------|---------------|-------------------------|-----------------------------------------------------------------------------------------------------------------------------------------------------------------------------------------------------------------------------------------------------------------------------------------------------|----------------------------------------------------------------------------------------------------------------------------------------------------------------------------------------------------------------------------------------------------------------------------------|------------------------------------------------------------------|
| 205040_at   | NM_000607 | ORM1 | Homo sapiens | 6-Oct-14 | Exemplar sequence | GenBank | gb:NM_000607.1 /DEF=Homo sapiens orosomuroid 1 (ORM1), mRNA. /FEA=mRNA /GEN=ORM1 /PROD=orosomuroid 1 precursor /DB_XREF=gi:9257231 /UG=Hs.572 orosomuroid 1 /FL=gb:M13692.1 gb:NM_000607.1 | NM_000607 | orosomuroid 1                   | ORM1          | 5004          | NM_000607               | 0002682 // regulation of immune system process // inferred from electronic annotation /// 0006810 // transport // inferred from electronic annotation /// 0006953 // acute-phase response // inferred from electronic annotation /// 0006954 // inflammatory response // traceable author statement | 0005576 // extracellular region // non-traceable author statement /// 0005615 // extracellular space // inferred from direct assay /// 0070062 // extracellular vesicular exosome // inferred from direct assay /// 0072562 // blood microparticle // inferred from direct assay | 0005515 // protein binding // inferred from physical interaction |
| 205041_s_at | NM_000607 | ORM1 | Homo sapiens | 6-Oct-14 | Exemplar sequence | GenBank | gb:NM_000607.1 /DEF=Homo sapiens orosomuroid 1 (ORM1), mRNA. /FEA=mRNA /GEN=ORM1 /PROD=orosomuroid 1 precursor /DB_XREF=gi:9257231 /UG=Hs.572 orosomuroid 1 /FL=gb:M13692.1 gb:NM_000607.1 | NM_000607 | orosomuroid 1 /// orosomuroid 2 | ORM1 /// ORM2 | 5004 /// 5005 | NM_000607 /// NM_000608 | 0002682 // regulation of immune system process // inferred from electronic annotation /// 0006810 // transport // inferred from electronic annotation /// 0006953 // acute-phase response // inferred from electronic annotation /// 0006954 // inflammatory response // traceable author statement | 0005576 // extracellular region // non-traceable author statement /// 0005615 // extracellular space // inferred from direct assay /// 0070062 // extracellular vesicular exosome // inferred from direct assay /// 0072562 // blood microparticle // inferred from direct assay | 0005515 // protein binding // inferred from physical interaction |



|             |           |      |              |          |                   |         |                                                                                                                                                                                                                                    |           |                           |      |      |                                                                                                                                                       |                                                                                                                                                                                                                                                                                                                                                                                                                                                                                                                                                                                                                                            |                                                                                                                                                                   |                                                                                                                                                                                                                                                                                                                                                                                                                                                                                                                                                                                                                                                                                                   |
|-------------|-----------|------|--------------|----------|-------------------|---------|------------------------------------------------------------------------------------------------------------------------------------------------------------------------------------------------------------------------------------|-----------|---------------------------|------|------|-------------------------------------------------------------------------------------------------------------------------------------------------------|--------------------------------------------------------------------------------------------------------------------------------------------------------------------------------------------------------------------------------------------------------------------------------------------------------------------------------------------------------------------------------------------------------------------------------------------------------------------------------------------------------------------------------------------------------------------------------------------------------------------------------------------|-------------------------------------------------------------------------------------------------------------------------------------------------------------------|---------------------------------------------------------------------------------------------------------------------------------------------------------------------------------------------------------------------------------------------------------------------------------------------------------------------------------------------------------------------------------------------------------------------------------------------------------------------------------------------------------------------------------------------------------------------------------------------------------------------------------------------------------------------------------------------------|
| 205048_s_at | NM_003832 | PSPH | Homo sapiens | 6-Oct-14 | Exemplar sequence | GenBank | gb:NM_003832.1 /DEF=Homo sapiens phosphoserine phosphatase-like (PSPHL), mRNA. /FEA=mRNA /GEN=PSPHL /PROD=L-3-phosphoserine phosphatase homolog /DB_XREF=gi:4502934 /UG=Hs.76845 phosphoserine phosphatase-like /FL=gb:NM_003832.1 | NM_003832 | phosphoserine phosphatase | PSPH | 5723 | NM_004577 ///<br>XM_005271773 ///<br>XM_005271774 ///<br>XM_005271775 ///<br>XM_005271776 ///<br>XM_005271777 ///<br>XM_006715760 ///<br>XM_006715761 | 0006563 // L-serine metabolic process // inferred from direct assay /// 0006564 // L-serine biosynthetic process // not recorded /// 0006564 // L-serine biosynthetic process // traceable author statement /// 0008152 // metabolic process // inferred from electronic annotation /// 0008652 // cellular amino acid biosynthetic process // traceable author statement /// 0009612 // response to mechanical stimulus // inferred from electronic annotation /// 0016311 // dephosphorylation // inferred from direct assay /// 0016311 // dephosphorylation // inferred from electronic annotation /// 0016311 // dephosphorylation // | 0005737 // cytoplasm // not recorded /// 0005829 // cytosol // traceable author statement /// 0043005 // neuron projection // inferred from electronic annotation | 0000287 // magnesium ion binding // inferred from direct assay /// 0004647 // phosphoserine phosphatase activity // inferred from direct assay /// 0004647 // phosphoserine phosphatase activity // traceable author statement /// 0005509 // calcium ion binding // inferred from direct assay /// 0008253 // 5'-nucleotidase activity // inferred from electronic annotation /// 0016787 // hydrolase activity // inferred from electronic annotation /// 0016791 // phosphatase activity // inferred from electronic annotation /// 0042803 // protein homodimerization activity // inferred from physical interaction /// 0046872 // metal ion binding // inferred from electronic annotation |
|-------------|-----------|------|--------------|----------|-------------------|---------|------------------------------------------------------------------------------------------------------------------------------------------------------------------------------------------------------------------------------------|-----------|---------------------------|------|------|-------------------------------------------------------------------------------------------------------------------------------------------------------|--------------------------------------------------------------------------------------------------------------------------------------------------------------------------------------------------------------------------------------------------------------------------------------------------------------------------------------------------------------------------------------------------------------------------------------------------------------------------------------------------------------------------------------------------------------------------------------------------------------------------------------------|-------------------------------------------------------------------------------------------------------------------------------------------------------------------|---------------------------------------------------------------------------------------------------------------------------------------------------------------------------------------------------------------------------------------------------------------------------------------------------------------------------------------------------------------------------------------------------------------------------------------------------------------------------------------------------------------------------------------------------------------------------------------------------------------------------------------------------------------------------------------------------|

|           |        |      |              |          |                    |         |                                                                                                                                                                          |        |                                     |      |      |                                                                                                                                                                                                                                                                                                 |                                                                                                                                                                                                                                                                                                                                                                                                                                                                                                                                                                                                                                                               |                                                                                                                                                                                                                                                                                                                                                                                                                                   |                                                                                                                                                                                                                                                                                                                                                                                                                                                                                                                               |
|-----------|--------|------|--------------|----------|--------------------|---------|--------------------------------------------------------------------------------------------------------------------------------------------------------------------------|--------|-------------------------------------|------|------|-------------------------------------------------------------------------------------------------------------------------------------------------------------------------------------------------------------------------------------------------------------------------------------------------|---------------------------------------------------------------------------------------------------------------------------------------------------------------------------------------------------------------------------------------------------------------------------------------------------------------------------------------------------------------------------------------------------------------------------------------------------------------------------------------------------------------------------------------------------------------------------------------------------------------------------------------------------------------|-----------------------------------------------------------------------------------------------------------------------------------------------------------------------------------------------------------------------------------------------------------------------------------------------------------------------------------------------------------------------------------------------------------------------------------|-------------------------------------------------------------------------------------------------------------------------------------------------------------------------------------------------------------------------------------------------------------------------------------------------------------------------------------------------------------------------------------------------------------------------------------------------------------------------------------------------------------------------------|
| 205117_at | X59065 | FGF1 | Homo sapiens | 6-Oct-14 | Consensus sequence | GenBank | Consensus includes gb:X59065 /DEF=H.sapiens FGF gene, exon 3 /FEA=mRNA /DB_XREF=gi:31359 /UG=Hs.75297 fibroblast growth factor 1 (acidic) /FL=gb:M13361.1 gb:NM_000800.1 | X59065 | fibroblast growth factor 1 (acidic) | FGF1 | 2246 | NM_000800 ///<br>NM_001144892 ///<br>NM_001144934 ///<br>NM_001144935 ///<br>NM_001257205 ///<br>NM_001257206 ///<br>NM_001257207 ///<br>NM_001257208 ///<br>NM_001257209 ///<br>NM_001257210 ///<br>NM_001257211 ///<br>NM_001257212 ///<br>NM_033136 ///<br>NM_033137 ///<br>XM_005268390 /// | 0001525 // angiogenesis // inferred from electronic annotation /// 0001759 // organ induction // inferred from electronic annotation /// 0001934 // positive regulation of protein phosphorylation // inferred from electronic annotation /// 0007165 // signal transduction // non-traceable author statement /// 0007173 // epidermal growth factor receptor signaling pathway // traceable author statement /// 0007275 // multicellular organismal development // traceable author statement /// 0008284 // positive regulation of cell proliferation // inferred from genetic interaction /// 0008286 // insulin receptor signaling pathway // traceable | 0005576 // extracellular region // inferred from direct assay /// 0005576 // extracellular region // traceable author statement /// 0005578 // proteinaceous extracellular matrix // inferred from electronic annotation /// 0005615 // extracellular space // inferred from direct assay /// 0005634 // nucleus // inferred from direct assay /// 0005730 // nucleolus // inferred from direct assay /// 0005737 // cytoplasm // | 0005102 // receptor binding // inferred from electronic annotation /// 0005104 // fibroblast growth factor receptor binding // inferred from physical interaction /// 0005515 // protein binding // inferred from physical interaction /// 0008083 // growth factor activity // inferred from direct assay /// 0008201 // heparin binding // inferred from direct assay /// 0030544 // Hsp70 protein binding // inferred from electronic annotation /// 0044548 // S100 protein binding // inferred from physical interaction |
|-----------|--------|------|--------------|----------|--------------------|---------|--------------------------------------------------------------------------------------------------------------------------------------------------------------------------|--------|-------------------------------------|------|------|-------------------------------------------------------------------------------------------------------------------------------------------------------------------------------------------------------------------------------------------------------------------------------------------------|---------------------------------------------------------------------------------------------------------------------------------------------------------------------------------------------------------------------------------------------------------------------------------------------------------------------------------------------------------------------------------------------------------------------------------------------------------------------------------------------------------------------------------------------------------------------------------------------------------------------------------------------------------------|-----------------------------------------------------------------------------------------------------------------------------------------------------------------------------------------------------------------------------------------------------------------------------------------------------------------------------------------------------------------------------------------------------------------------------------|-------------------------------------------------------------------------------------------------------------------------------------------------------------------------------------------------------------------------------------------------------------------------------------------------------------------------------------------------------------------------------------------------------------------------------------------------------------------------------------------------------------------------------|

|             |           |     |              |          |                   |         |                                                                                                                                                                |           |                                     |               |               |                                                                                                                                                                                                                                                     |                                                                                                                                                                                                                                                                                                                                                                                                                                                                                                                                                                                                                     |                                                                                                                                                                                                                                                                                                                                                                                           |                                                                                                                                                                                                                                                                                                                                                                                                                                                                                                                                                                                                                                                                                                                                                                       |
|-------------|-----------|-----|--------------|----------|-------------------|---------|----------------------------------------------------------------------------------------------------------------------------------------------------------------|-----------|-------------------------------------|---------------|---------------|-----------------------------------------------------------------------------------------------------------------------------------------------------------------------------------------------------------------------------------------------------|---------------------------------------------------------------------------------------------------------------------------------------------------------------------------------------------------------------------------------------------------------------------------------------------------------------------------------------------------------------------------------------------------------------------------------------------------------------------------------------------------------------------------------------------------------------------------------------------------------------------|-------------------------------------------------------------------------------------------------------------------------------------------------------------------------------------------------------------------------------------------------------------------------------------------------------------------------------------------------------------------------------------------|-----------------------------------------------------------------------------------------------------------------------------------------------------------------------------------------------------------------------------------------------------------------------------------------------------------------------------------------------------------------------------------------------------------------------------------------------------------------------------------------------------------------------------------------------------------------------------------------------------------------------------------------------------------------------------------------------------------------------------------------------------------------------|
| 205157_s_at | NM_000422 | JUP | Homo sapiens | 6-Oct-14 | Exemplar sequence | GenBank | gb:NM_000422.1 /DEF=Homo sapiens keratin 17 (KRT17), mRNA. /FEA=mRNA /GEN=KRT17 /PROD=keratin 17 /DB_XREF=gi:4557700 /UG=Hs.2785 keratin 17 /FL=gb:NM_000422.1 | NM_000422 | junction plakoglobin /// keratin 17 | JUP /// KRT17 | 3728 /// 3872 | NM_000422 ///<br>NM_002230 ///<br>NM_021991 ///<br>XM_005257313 ///<br>XM_005257349 ///<br>XM_006721871 ///<br>XM_006721872 ///<br>XM_006721873 ///<br>XM_006721874 ///<br>XM_006721875 ///<br>XM_006721876 ///<br>XM_006721877 ///<br>XM_006721878 | 0000122 // negative regulation of transcription from RNA polymerase II promoter // not recorded /// 0000902 // cell morphogenesis // not recorded /// 0002009 // morphogenesis of an epithelium // inferred from electronic annotation /// 0002159 // desmosome assembly // inferred from direct assay /// 0002159 // desmosome assembly // inferred from mutant phenotype /// 0003136 // negative regulation of heart induction by canonical Wnt signaling pathway // not recorded /// 0003181 // atrioventricular valve morphogenesis // not recorded /// 0003308 // negative regulation of Wnt signaling pathway | 0005634 // nucleus // inferred from mutant phenotype /// 0005667 // transcription factor complex // not recorded /// 0005737 // cytoplasm // inferred from mutant phenotype /// 0005737 // cytoplasm // inferred from electronic annotation /// 0005829 // cytosol // inferred from sequence or structural similarity /// 0005856 // cytoskeleton // inferred from sequence or structural | 0003713 // transcription coactivator activity // inferred from direct assay /// 0005198 // structural molecule activity // not recorded /// 0005198 // structural molecule activity // non-traceable author statement /// 0005199 // structural constituent of cell wall // inferred by curator /// 0005200 // structural constituent of cytoskeleton // traceable author statement /// 0005488 // binding // inferred from electronic annotation /// 0005515 // protein binding // inferred from physical interaction /// 0019901 // protein kinase binding // not recorded /// 0019903 // protein phosphatase binding // inferred from physical interaction /// 0032395 // MHC class II receptor activity // inferred from direct assay /// 0042289 // MHC class II |
|-------------|-----------|-----|--------------|----------|-------------------|---------|----------------------------------------------------------------------------------------------------------------------------------------------------------------|-----------|-------------------------------------|---------------|---------------|-----------------------------------------------------------------------------------------------------------------------------------------------------------------------------------------------------------------------------------------------------|---------------------------------------------------------------------------------------------------------------------------------------------------------------------------------------------------------------------------------------------------------------------------------------------------------------------------------------------------------------------------------------------------------------------------------------------------------------------------------------------------------------------------------------------------------------------------------------------------------------------|-------------------------------------------------------------------------------------------------------------------------------------------------------------------------------------------------------------------------------------------------------------------------------------------------------------------------------------------------------------------------------------------|-----------------------------------------------------------------------------------------------------------------------------------------------------------------------------------------------------------------------------------------------------------------------------------------------------------------------------------------------------------------------------------------------------------------------------------------------------------------------------------------------------------------------------------------------------------------------------------------------------------------------------------------------------------------------------------------------------------------------------------------------------------------------|

|           |          |       |              |          |                   |         |                                                                                                                                                                                                                                                                        |          |                      |       |      |                                             |                                                                                                                                                                                                                                                                                                                                                                                                                                                                                                                                                                                                                                             |                                                                                                                                                                                                                                                                                                                                                                                          |                                                                                                                                                                                                                                                                                                                                                                                                                                                                                                                                                                                                                                                                                                                                                        |
|-----------|----------|-------|--------------|----------|-------------------|---------|------------------------------------------------------------------------------------------------------------------------------------------------------------------------------------------------------------------------------------------------------------------------|----------|----------------------|-------|------|---------------------------------------------|---------------------------------------------------------------------------------------------------------------------------------------------------------------------------------------------------------------------------------------------------------------------------------------------------------------------------------------------------------------------------------------------------------------------------------------------------------------------------------------------------------------------------------------------------------------------------------------------------------------------------------------------|------------------------------------------------------------------------------------------------------------------------------------------------------------------------------------------------------------------------------------------------------------------------------------------------------------------------------------------------------------------------------------------|--------------------------------------------------------------------------------------------------------------------------------------------------------------------------------------------------------------------------------------------------------------------------------------------------------------------------------------------------------------------------------------------------------------------------------------------------------------------------------------------------------------------------------------------------------------------------------------------------------------------------------------------------------------------------------------------------------------------------------------------------------|
| 205187_at | AF010601 | SMAD5 | Homo sapiens | 6-Oct-14 | Exemplar sequence | GenBank | gb:AF010601.1 /DEF=Homo sapiens SMAD5 (Smad5) mRNA, complete cds. /FEA=mRNA /GEN=Smad5 /PROD=SMAD5 /DB_XREF=gi:2317785 /UG=Hs.37501 MAD (mothers against decapentaplegic, Drosophila) homolog 5 /FL=gb:U59913.1 gb:U73825.1 gb:AF009678.1 gb:AF010601.1 gb:NM_005903.1 | AF010601 | SMAD family member 5 | SMAD5 | 4090 | NM_001001419 /// NM_001001420 /// NM_005903 | 0001503 // ossification // inferred from electronic annotation /// 0001657 // ureteric bud development // inferred from electronic annotation /// 0001880 // Mullerian duct regression // inferred from electronic annotation /// 0002051 // osteoblast fate commitment // inferred from electronic annotation /// 0006351 // transcription, DNA-templated // inferred from electronic annotation /// 0006355 // regulation of transcription, DNA-templated // inferred from electronic annotation /// 0006468 // protein phosphorylation // inferred from electronic annotation /// 0007165 // signal transduction // non-traceable author | 0005622 // intracellular // non-traceable author statement /// 0005634 // nucleus // non-traceable author statement /// 0005634 // nucleus // traceable author statement /// 0005654 // nucleoplasm // traceable author statement /// 0005667 // transcription factor complex // inferred from electronic annotation /// 0005737 // cytoplasm // inferred from electronic annotation /// | 0000979 // RNA polymerase II core promoter sequence-specific DNA binding // inferred from electronic annotation /// 0003677 // DNA binding // inferred from electronic annotation /// 0003700 // sequence-specific DNA binding transcription factor activity // inferred from electronic annotation /// 0005057 // receptor signaling protein activity // non-traceable author statement /// 0005515 // protein binding // inferred from physical interaction /// 0030618 // transforming growth factor beta receptor, pathway-specific cytoplasmic mediator activity // traceable author statement /// 0031625 // ubiquitin protein ligase binding // inferred from physical interaction /// 0046872 // metal ion binding // inferred from electronic |
|-----------|----------|-------|--------------|----------|-------------------|---------|------------------------------------------------------------------------------------------------------------------------------------------------------------------------------------------------------------------------------------------------------------------------|----------|----------------------|-------|------|---------------------------------------------|---------------------------------------------------------------------------------------------------------------------------------------------------------------------------------------------------------------------------------------------------------------------------------------------------------------------------------------------------------------------------------------------------------------------------------------------------------------------------------------------------------------------------------------------------------------------------------------------------------------------------------------------|------------------------------------------------------------------------------------------------------------------------------------------------------------------------------------------------------------------------------------------------------------------------------------------------------------------------------------------------------------------------------------------|--------------------------------------------------------------------------------------------------------------------------------------------------------------------------------------------------------------------------------------------------------------------------------------------------------------------------------------------------------------------------------------------------------------------------------------------------------------------------------------------------------------------------------------------------------------------------------------------------------------------------------------------------------------------------------------------------------------------------------------------------------|

|             |           |       |              |          |                   |         |                                                                                                                                                                                                                                                                                                                |           |                      |       |      |                                                   |                                                                                                                                                                                                                                                                                                                                                                                                                                                                                                                                                                                                                                                                  |                                                                                                                                                                                                                                                                                                                                                                                                         |                                                                                                                                                                                                                                                                                                                                                                                                                                                                                                                                                                                                                                                                                                                                                                             |
|-------------|-----------|-------|--------------|----------|-------------------|---------|----------------------------------------------------------------------------------------------------------------------------------------------------------------------------------------------------------------------------------------------------------------------------------------------------------------|-----------|----------------------|-------|------|---------------------------------------------------|------------------------------------------------------------------------------------------------------------------------------------------------------------------------------------------------------------------------------------------------------------------------------------------------------------------------------------------------------------------------------------------------------------------------------------------------------------------------------------------------------------------------------------------------------------------------------------------------------------------------------------------------------------------|---------------------------------------------------------------------------------------------------------------------------------------------------------------------------------------------------------------------------------------------------------------------------------------------------------------------------------------------------------------------------------------------------------|-----------------------------------------------------------------------------------------------------------------------------------------------------------------------------------------------------------------------------------------------------------------------------------------------------------------------------------------------------------------------------------------------------------------------------------------------------------------------------------------------------------------------------------------------------------------------------------------------------------------------------------------------------------------------------------------------------------------------------------------------------------------------------|
| 205188_s_at | NM_005903 | SMAD5 | Homo sapiens | 6-Oct-14 | Exemplar sequence | GenBank | gb:NM_005903.1 /DEF=Homo sapiens MAD (mothers against decapentaplegic, Drosophila) homolog 5 (MADH5), mRNA. /FEA=mRNA /GEN=MADH5 /PROD=MAD (mothers against decapentaplegic, Drosophila) homolog 5 /DB_XREF=gi:5174514 /UG=Hs.37501 MAD (mothers against decapentaplegic, Drosophila) homolog 5 /FL=gb:U59913. | NM_005903 | SMAD family member 5 | SMAD5 | 4090 | NM_001001419 ///<br>NM_001001420 ///<br>NM_005903 | 0001503 // ossification // inferred from electronic annotation ///<br>0001657 // ureteric bud development // inferred from electronic annotation ///<br>0001880 // Mullerian duct regression // inferred from electronic annotation ///<br>0002051 // osteoblast fate commitment // inferred from electronic annotation ///<br>0006351 // transcription, DNA-templated // inferred from electronic annotation ///<br>0006355 // regulation of transcription, DNA-templated // inferred from electronic annotation ///<br>0006468 // protein phosphorylation // inferred from electronic annotation ///<br>0007165 // signal transduction // non-traceable author | 0005622 // intracellular // non-traceable author statement ///<br>0005634 // nucleus // non-traceable author statement ///<br>0005634 // nucleus // traceable author statement ///<br>0005654 // nucleoplasm // traceable author statement ///<br>0005667 // transcription factor complex // inferred from electronic annotation ///<br>0005737 // cytoplasm // inferred from electronic annotation /// | 0000979 // RNA polymerase II core promoter sequence-specific DNA binding // inferred from electronic annotation ///<br>0003677 // DNA binding // inferred from electronic annotation ///<br>0003700 // sequence-specific DNA binding transcription factor activity // inferred from electronic annotation ///<br>0005057 // receptor signaling protein activity // non-traceable author statement ///<br>0005515 // protein binding // inferred from physical interaction ///<br>0030618 // transforming growth factor beta receptor, pathway-specific cytoplasmic mediator activity // traceable author statement ///<br>0031625 // ubiquitin protein ligase binding // inferred from physical interaction ///<br>0046872 // metal ion binding // inferred from electronic |
|-------------|-----------|-------|--------------|----------|-------------------|---------|----------------------------------------------------------------------------------------------------------------------------------------------------------------------------------------------------------------------------------------------------------------------------------------------------------------|-----------|----------------------|-------|------|---------------------------------------------------|------------------------------------------------------------------------------------------------------------------------------------------------------------------------------------------------------------------------------------------------------------------------------------------------------------------------------------------------------------------------------------------------------------------------------------------------------------------------------------------------------------------------------------------------------------------------------------------------------------------------------------------------------------------|---------------------------------------------------------------------------------------------------------------------------------------------------------------------------------------------------------------------------------------------------------------------------------------------------------------------------------------------------------------------------------------------------------|-----------------------------------------------------------------------------------------------------------------------------------------------------------------------------------------------------------------------------------------------------------------------------------------------------------------------------------------------------------------------------------------------------------------------------------------------------------------------------------------------------------------------------------------------------------------------------------------------------------------------------------------------------------------------------------------------------------------------------------------------------------------------------|

|           |           |      |              |          |                   |         |                                                                                                                                                                                                            |           |                           |      |      |                                                                                                                                                       |                                                                                                                                                                                                                                                                                                                                                                                                                                                                                                                                                                                                                                            |                                                                                                                                                                   |                                                                                                                                                                                                                                                                                                                                                                                                                                                                                                                                                                                                                                                                                                   |
|-----------|-----------|------|--------------|----------|-------------------|---------|------------------------------------------------------------------------------------------------------------------------------------------------------------------------------------------------------------|-----------|---------------------------|------|------|-------------------------------------------------------------------------------------------------------------------------------------------------------|--------------------------------------------------------------------------------------------------------------------------------------------------------------------------------------------------------------------------------------------------------------------------------------------------------------------------------------------------------------------------------------------------------------------------------------------------------------------------------------------------------------------------------------------------------------------------------------------------------------------------------------------|-------------------------------------------------------------------------------------------------------------------------------------------------------------------|---------------------------------------------------------------------------------------------------------------------------------------------------------------------------------------------------------------------------------------------------------------------------------------------------------------------------------------------------------------------------------------------------------------------------------------------------------------------------------------------------------------------------------------------------------------------------------------------------------------------------------------------------------------------------------------------------|
| 205194_at | NM_004577 | PSPH | Homo sapiens | 6-Oct-14 | Exemplar sequence | GenBank | gb:NM_004577.1 /DEF=Homo sapiens phosphoserine phosphatase (PSPH), mRNA. /FEA=mRNA /GEN=PSPH /PROD=phosphoserine phosphatase /DB_XREF=gi:4758971 /UG=Hs.56407 phosphoserine phosphatase /FL=gb:NM_004577.1 | NM_004577 | phosphoserine phosphatase | PSPH | 5723 | NM_004577 ///<br>XM_005271773 ///<br>XM_005271774 ///<br>XM_005271775 ///<br>XM_005271776 ///<br>XM_005271777 ///<br>XM_006715760 ///<br>XM_006715761 | 0006563 // L-serine metabolic process // inferred from direct assay /// 0006564 // L-serine biosynthetic process // not recorded /// 0006564 // L-serine biosynthetic process // traceable author statement /// 0008152 // metabolic process // inferred from electronic annotation /// 0008652 // cellular amino acid biosynthetic process // traceable author statement /// 0009612 // response to mechanical stimulus // inferred from electronic annotation /// 0016311 // dephosphorylation // inferred from direct assay /// 0016311 // dephosphorylation // inferred from electronic annotation /// 0016311 // dephosphorylation // | 0005737 // cytoplasm // not recorded /// 0005829 // cytosol // traceable author statement /// 0043005 // neuron projection // inferred from electronic annotation | 0000287 // magnesium ion binding // inferred from direct assay /// 0004647 // phosphoserine phosphatase activity // inferred from direct assay /// 0004647 // phosphoserine phosphatase activity // traceable author statement /// 0005509 // calcium ion binding // inferred from direct assay /// 0008253 // 5'-nucleotidase activity // inferred from electronic annotation /// 0016787 // hydrolase activity // inferred from electronic annotation /// 0016791 // phosphatase activity // inferred from electronic annotation /// 0042803 // protein homodimerization activity // inferred from physical interaction /// 0046872 // metal ion binding // inferred from electronic annotation |
|-----------|-----------|------|--------------|----------|-------------------|---------|------------------------------------------------------------------------------------------------------------------------------------------------------------------------------------------------------------|-----------|---------------------------|------|------|-------------------------------------------------------------------------------------------------------------------------------------------------------|--------------------------------------------------------------------------------------------------------------------------------------------------------------------------------------------------------------------------------------------------------------------------------------------------------------------------------------------------------------------------------------------------------------------------------------------------------------------------------------------------------------------------------------------------------------------------------------------------------------------------------------------|-------------------------------------------------------------------------------------------------------------------------------------------------------------------|---------------------------------------------------------------------------------------------------------------------------------------------------------------------------------------------------------------------------------------------------------------------------------------------------------------------------------------------------------------------------------------------------------------------------------------------------------------------------------------------------------------------------------------------------------------------------------------------------------------------------------------------------------------------------------------------------|

|           |           |        |              |          |                   |         |                                                                                                                                                                                                                                                                                                |           |                             |        |      |           |                                                                                                                                                                                                                                                                                                                                                                                                                                                                                                                                                                              |                                                                                                                                                                                                                                                                                                                                                                           |                                                                                                                                                                                                                                                                                                                                                                                                                                                                                                                                                                                                                                                                                                                             |
|-----------|-----------|--------|--------------|----------|-------------------|---------|------------------------------------------------------------------------------------------------------------------------------------------------------------------------------------------------------------------------------------------------------------------------------------------------|-----------|-----------------------------|--------|------|-----------|------------------------------------------------------------------------------------------------------------------------------------------------------------------------------------------------------------------------------------------------------------------------------------------------------------------------------------------------------------------------------------------------------------------------------------------------------------------------------------------------------------------------------------------------------------------------------|---------------------------------------------------------------------------------------------------------------------------------------------------------------------------------------------------------------------------------------------------------------------------------------------------------------------------------------------------------------------------|-----------------------------------------------------------------------------------------------------------------------------------------------------------------------------------------------------------------------------------------------------------------------------------------------------------------------------------------------------------------------------------------------------------------------------------------------------------------------------------------------------------------------------------------------------------------------------------------------------------------------------------------------------------------------------------------------------------------------------|
| 205214_at | NM_004226 | STK17B | Homo sapiens | 6-Oct-14 | Exemplar sequence | GenBank | gb:NM_004226.1 /DEF=Homo sapiens serinethreonine kinase 17b (apoptosis-inducing) (STK17B), mRNA. /FEA=mRNA /GEN=STK17B /PROD=serinethreonine kinase 17b(apoptosis-inducing) /DB_XREF=gi:4758193 /UG=Hs.120996 serinethreonine kinase 17b (apoptosis-inducing) /FL=gb:AB011421.1 gb:NM_004226.1 | NM_004226 | serine/threonine kinase 17b | STK17B | 9262 | NM_004226 | 0006468 // protein phosphorylation // inferred from direct assay /// 0006915 // apoptotic process // inferred from electronic annotation /// 0012501 // programmed cell death // inferred from electronic annotation /// 0016310 // phosphorylation // inferred from electronic annotation /// 0035556 // intracellular signal transduction // inferred from direct assay /// 0046777 // protein autophosphorylation // inferred from sequence or structural similarity /// 2000271 // positive regulation of fibroblast apoptotic process // inferred from mutant phenotype | 0005634 // nucleus // inferred from direct assay /// 0005793 // endoplasmic reticulum-Golgi intermediate compartment // inferred from electronic annotation /// 0005886 // plasma membrane // inferred from electronic annotation /// 0015629 // actin cytoskeleton // inferred from electronic annotation /// 0016020 // membrane // inferred from electronic annotation | 0000166 // nucleotide binding // inferred from electronic annotation /// 0004672 // protein kinase activity // inferred from sequence or structural similarity /// 0004674 // protein serine/threonine kinase activity // inferred from direct assay /// 0004713 // protein tyrosine kinase activity // inferred from electronic annotation /// 0005515 // protein binding // inferred from electronic annotation /// 0005524 // ATP binding // inferred from direct assay /// 0016301 // kinase activity // inferred from electronic annotation /// 0016740 // transferase activity // inferred from electronic annotation /// 0016772 // transferase activity, transferring phosphorus-containing groups // inferred from |
|-----------|-----------|--------|--------------|----------|-------------------|---------|------------------------------------------------------------------------------------------------------------------------------------------------------------------------------------------------------------------------------------------------------------------------------------------------|-----------|-----------------------------|--------|------|-----------|------------------------------------------------------------------------------------------------------------------------------------------------------------------------------------------------------------------------------------------------------------------------------------------------------------------------------------------------------------------------------------------------------------------------------------------------------------------------------------------------------------------------------------------------------------------------------|---------------------------------------------------------------------------------------------------------------------------------------------------------------------------------------------------------------------------------------------------------------------------------------------------------------------------------------------------------------------------|-----------------------------------------------------------------------------------------------------------------------------------------------------------------------------------------------------------------------------------------------------------------------------------------------------------------------------------------------------------------------------------------------------------------------------------------------------------------------------------------------------------------------------------------------------------------------------------------------------------------------------------------------------------------------------------------------------------------------------|

|             |           |        |              |          |                    |         |                                                                                                                                                                                                                                                                                     |           |                                      |        |       |                                                                                                                                                                                                                                                                     |                                                                                                                                                                                                                                                                                                                                                           |                                                                                                                                                                                                                                    |                                                                   |
|-------------|-----------|--------|--------------|----------|--------------------|---------|-------------------------------------------------------------------------------------------------------------------------------------------------------------------------------------------------------------------------------------------------------------------------------------|-----------|--------------------------------------|--------|-------|---------------------------------------------------------------------------------------------------------------------------------------------------------------------------------------------------------------------------------------------------------------------|-----------------------------------------------------------------------------------------------------------------------------------------------------------------------------------------------------------------------------------------------------------------------------------------------------------------------------------------------------------|------------------------------------------------------------------------------------------------------------------------------------------------------------------------------------------------------------------------------------|-------------------------------------------------------------------|
| 205298_s_at | W58757    | BTN2A2 | Homo sapiens | 6-Oct-14 | Consensus sequence | GenBank | Consensus includes<br>gb:W58757<br>/FEA=EST<br>/DB_XREF=gi:1364334<br>/DB_XREF=est:zd24d07.s1<br>/CLONE=IMAGE:341581<br>/UG=Hs.91813<br>butyrophilin, subfamily 2, member A2<br>/FL=gb:U90550.1<br>gb:NM_006995.2                                                                   | W58757    | butyrophilin, subfamily 2, member A2 | BTN2A2 | 10385 | NM_001197237<br>///<br>NM_001197238<br>///<br>NM_001197239<br>///<br>NM_001197240<br>///<br>NM_006995<br>///<br>NM_181531<br>///<br>XM_005248797<br>///<br>XM_005248798<br>///<br>XM_006714953<br>///<br>XM_006714954<br>///<br>XM_006714955<br>///<br>XM_006714956 | 0031324 // negative regulation of cellular metabolic process // inferred from sequence or structural similarity ///<br>0046007 // negative regulation of activated T cell proliferation // inferred from sequence or structural similarity ///<br>0050710 // negative regulation of cytokine secretion // inferred from sequence or structural similarity | 0016020 // membrane // inferred from electronic annotation ///<br>0016021 // integral component of membrane // inferred from electronic annotation ///<br>0070062 // extracellular vesicular exosome // inferred from direct assay | 0005515 // protein binding // inferred from electronic annotation |
| 205299_s_at | NM_006995 | BTN2A2 | Homo sapiens | 6-Oct-14 | Exemplar sequence  | GenBank | gb:NM_006995.2 /DEF=Homo sapiens butyrophilin, subfamily 2, member A2 (BTN2A2), mRNA.<br>/FEA=mRNA<br>/GEN=BTN2A2<br>/PROD=butyrophilin, subfamily 2, member A2<br>/DB_XREF=gi:6453812<br>/UG=Hs.91813<br>butyrophilin, subfamily 2, member A2<br>/FL=gb:U90550.1<br>gb:NM_006995.2 | NM_006995 | butyrophilin, subfamily 2, member A2 | BTN2A2 | 10385 | NM_001197237<br>///<br>NM_001197238<br>///<br>NM_001197239<br>///<br>NM_001197240<br>///<br>NM_006995<br>///<br>NM_181531<br>///<br>XM_005248797<br>///<br>XM_005248798<br>///<br>XM_006714953<br>///<br>XM_006714954<br>///<br>XM_006714955<br>///<br>XM_006714956 | 0031324 // negative regulation of cellular metabolic process // inferred from sequence or structural similarity ///<br>0046007 // negative regulation of activated T cell proliferation // inferred from sequence or structural similarity ///<br>0050710 // negative regulation of cytokine secretion // inferred from sequence or structural similarity | 0016020 // membrane // inferred from electronic annotation ///<br>0016021 // integral component of membrane // inferred from electronic annotation ///<br>0070062 // extracellular vesicular exosome // inferred from direct assay | 0005515 // protein binding // inferred from electronic annotation |



|             |          |      |              |          |                    |         |                                                                                                                                                                                                                 |          |                         |      |       |           |                                                                                                                                                                                                                                                                                                                                                                                                                                                                                                                                                                                                                              |                                                                                                                                                                                                                                                                                                                                                                                           |                                                                                                                                                                                                                                                                                                                                                                                                                                                                                                                                                                                                                                                                                                                                    |
|-------------|----------|------|--------------|----------|--------------------|---------|-----------------------------------------------------------------------------------------------------------------------------------------------------------------------------------------------------------------|----------|-------------------------|------|-------|-----------|------------------------------------------------------------------------------------------------------------------------------------------------------------------------------------------------------------------------------------------------------------------------------------------------------------------------------------------------------------------------------------------------------------------------------------------------------------------------------------------------------------------------------------------------------------------------------------------------------------------------------|-------------------------------------------------------------------------------------------------------------------------------------------------------------------------------------------------------------------------------------------------------------------------------------------------------------------------------------------------------------------------------------------|------------------------------------------------------------------------------------------------------------------------------------------------------------------------------------------------------------------------------------------------------------------------------------------------------------------------------------------------------------------------------------------------------------------------------------------------------------------------------------------------------------------------------------------------------------------------------------------------------------------------------------------------------------------------------------------------------------------------------------|
| 205434_s_at | AW451954 | AAK1 | Homo sapiens | 6-Oct-14 | Consensus sequence | GenBank | Consensus includes<br>gb:AW451954<br>/FEA=EST<br>/DB_XREF=gi:6992730<br>/DB_XREF=est:UI-H-BI3-alt-h-06-0-UI.s1<br>/CLONE=IMAGE:3068771<br>/UG=Hs.135941 KIAA1048 protein<br>/FL=gb:AB028971.1<br>gb:NM_014911.1 | AW451954 | AP2 associated kinase 1 | AAK1 | 22848 | NM_014911 | 0006468 // protein phosphorylation // inferred from direct assay /// 0006897 // endocytosis // inferred from electronic annotation /// 0016310 // phosphorylation // inferred from electronic annotation /// 0032880 // regulation of protein localization // inferred from direct assay /// 0045747 // positive regulation of Notch signaling pathway // inferred from direct assay /// 0046777 // protein autophosphorylation // inferred from sequence or structural similarity /// 0050821 // protein stabilization // inferred from direct assay /// 2000369 // regulation of clathrin-mediated endocytosis // inferred | 0005886 // plasma membrane // inferred from electronic annotation /// 0005905 // coated pit // inferred from electronic annotation /// 0016020 // membrane // inferred from electronic annotation /// 0019897 // extrinsic component of plasma membrane // inferred from sequence or structural similarity /// 0030136 // clathrin-coated vesicle // inferred from sequence or structural | 0000166 // nucleotide binding // inferred from electronic annotation /// 0004672 // protein kinase activity // inferred from electronic annotation /// 0004674 // protein serine/threonine kinase activity // inferred from sequence or structural similarity /// 0004713 // protein tyrosine kinase activity // inferred from electronic annotation /// 0005112 // Notch binding // inferred from direct assay /// 0005515 // protein binding // inferred from physical interaction /// 0005524 // ATP binding // inferred from electronic annotation /// 0016301 // kinase activity // inferred from electronic annotation /// 0016740 // transferase activity // inferred from electronic annotation /// 0016772 // transferase |
|-------------|----------|------|--------------|----------|--------------------|---------|-----------------------------------------------------------------------------------------------------------------------------------------------------------------------------------------------------------------|----------|-------------------------|------|-------|-----------|------------------------------------------------------------------------------------------------------------------------------------------------------------------------------------------------------------------------------------------------------------------------------------------------------------------------------------------------------------------------------------------------------------------------------------------------------------------------------------------------------------------------------------------------------------------------------------------------------------------------------|-------------------------------------------------------------------------------------------------------------------------------------------------------------------------------------------------------------------------------------------------------------------------------------------------------------------------------------------------------------------------------------------|------------------------------------------------------------------------------------------------------------------------------------------------------------------------------------------------------------------------------------------------------------------------------------------------------------------------------------------------------------------------------------------------------------------------------------------------------------------------------------------------------------------------------------------------------------------------------------------------------------------------------------------------------------------------------------------------------------------------------------|

|             |           |      |              |          |                   |         |                                                                                                                                                                                                        |           |                         |      |       |           |                                                                                                                                                                                                                                                                                                                                                                                                                                                                                                                                                                                                                              |                                                                                                                                                                                                                                                                                                                                                                                           |                                                                                                                                                                                                                                                                                                                                                                                                                                                                                                                                                                                                                                                                                                                                    |
|-------------|-----------|------|--------------|----------|-------------------|---------|--------------------------------------------------------------------------------------------------------------------------------------------------------------------------------------------------------|-----------|-------------------------|------|-------|-----------|------------------------------------------------------------------------------------------------------------------------------------------------------------------------------------------------------------------------------------------------------------------------------------------------------------------------------------------------------------------------------------------------------------------------------------------------------------------------------------------------------------------------------------------------------------------------------------------------------------------------------|-------------------------------------------------------------------------------------------------------------------------------------------------------------------------------------------------------------------------------------------------------------------------------------------------------------------------------------------------------------------------------------------|------------------------------------------------------------------------------------------------------------------------------------------------------------------------------------------------------------------------------------------------------------------------------------------------------------------------------------------------------------------------------------------------------------------------------------------------------------------------------------------------------------------------------------------------------------------------------------------------------------------------------------------------------------------------------------------------------------------------------------|
| 205435_s_at | NM_014911 | AAK1 | Homo sapiens | 6-Oct-14 | Exemplar sequence | GenBank | gb:NM_014911.1 /DEF=Homo sapiens KIAA1048 protein (KIAA1048), mRNA. /FEA=mRNA /GEN=KIAA1048 /PROD=KIAA1048 protein /DB_XREF=gi:7662461 /UG=Hs.135941 KIAA1048 protein /FL=gb:AB028971.1 gb:NM_014911.1 | NM_014911 | AP2 associated kinase 1 | AAK1 | 22848 | NM_014911 | 0006468 // protein phosphorylation // inferred from direct assay /// 0006897 // endocytosis // inferred from electronic annotation /// 0016310 // phosphorylation // inferred from electronic annotation /// 0032880 // regulation of protein localization // inferred from direct assay /// 0045747 // positive regulation of Notch signaling pathway // inferred from direct assay /// 0046777 // protein autophosphorylation // inferred from sequence or structural similarity /// 0050821 // protein stabilization // inferred from direct assay /// 2000369 // regulation of clathrin-mediated endocytosis // inferred | 0005886 // plasma membrane // inferred from electronic annotation /// 0005905 // coated pit // inferred from electronic annotation /// 0016020 // membrane // inferred from electronic annotation /// 0019897 // extrinsic component of plasma membrane // inferred from sequence or structural similarity /// 0030136 // clathrin-coated vesicle // inferred from sequence or structural | 0000166 // nucleotide binding // inferred from electronic annotation /// 0004672 // protein kinase activity // inferred from electronic annotation /// 0004674 // protein serine/threonine kinase activity // inferred from sequence or structural similarity /// 0004713 // protein tyrosine kinase activity // inferred from electronic annotation /// 0005112 // Notch binding // inferred from direct assay /// 0005515 // protein binding // inferred from physical interaction /// 0005524 // ATP binding // inferred from electronic annotation /// 0016301 // kinase activity // inferred from electronic annotation /// 0016740 // transferase activity // inferred from electronic annotation /// 0016772 // transferase |
|-------------|-----------|------|--------------|----------|-------------------|---------|--------------------------------------------------------------------------------------------------------------------------------------------------------------------------------------------------------|-----------|-------------------------|------|-------|-----------|------------------------------------------------------------------------------------------------------------------------------------------------------------------------------------------------------------------------------------------------------------------------------------------------------------------------------------------------------------------------------------------------------------------------------------------------------------------------------------------------------------------------------------------------------------------------------------------------------------------------------|-------------------------------------------------------------------------------------------------------------------------------------------------------------------------------------------------------------------------------------------------------------------------------------------------------------------------------------------------------------------------------------------|------------------------------------------------------------------------------------------------------------------------------------------------------------------------------------------------------------------------------------------------------------------------------------------------------------------------------------------------------------------------------------------------------------------------------------------------------------------------------------------------------------------------------------------------------------------------------------------------------------------------------------------------------------------------------------------------------------------------------------|

|             |          |        |              |          |                    |         |                                                                                                                                                                                                                                         |          |                                                      |        |      |                            |                                                                                                                                                                                                                                                                                                                            |                                                                                                                                                                                                                                                               |                                                                                                                                                                                                                                                                 |
|-------------|----------|--------|--------------|----------|--------------------|---------|-----------------------------------------------------------------------------------------------------------------------------------------------------------------------------------------------------------------------------------------|----------|------------------------------------------------------|--------|------|----------------------------|----------------------------------------------------------------------------------------------------------------------------------------------------------------------------------------------------------------------------------------------------------------------------------------------------------------------------|---------------------------------------------------------------------------------------------------------------------------------------------------------------------------------------------------------------------------------------------------------------|-----------------------------------------------------------------------------------------------------------------------------------------------------------------------------------------------------------------------------------------------------------------|
| 205465_x_at | BF000296 | HS3ST1 | Homo sapiens | 6-Oct-14 | Consensus sequence | GenBank | Consensus includes<br>gb:BF000296<br>/FEA=EST<br>/DB_XREF=gi:10700571<br>/DB_XREF=est:7h25e12.x1<br>/CLONE=IMAGE:3317038<br>/UG=Hs.40968<br>heparan sulfate (glucosamine) 3-O-sulfotransferase 1<br>/FL=gb:AF019386.1<br>gb:NM_005114.1 | BF000296 | heparan sulfate (glucosamine) 3-O-sulfotransferase 1 | HS3ST1 | 9957 | NM_005114 /// XM_005248221 | 0005975 // carbohydrate metabolic process // traceable author statement /// 0006024 // glycosaminoglycan biosynthetic process // traceable author statement /// 0030203 // glycosaminoglycan metabolic process // traceable author statement /// 0044281 // small molecule metabolic process // traceable author statement | 0005737 // cytoplasm // inferred from direct assay /// 0005794 // Golgi apparatus // inferred from electronic annotation /// 0005796 // Golgi lumen // traceable author statement /// 0016021 // integral component of membrane // traceable author statement | 0008146 // sulfotransferase activity // traceable author statement /// 0008467 // [heparan sulfate]-glucosamine 3-sulfotransferase 1 activity // inferred from electronic annotation /// 0016740 // transferase activity // inferred from electronic annotation |
|-------------|----------|--------|--------------|----------|--------------------|---------|-----------------------------------------------------------------------------------------------------------------------------------------------------------------------------------------------------------------------------------------|----------|------------------------------------------------------|--------|------|----------------------------|----------------------------------------------------------------------------------------------------------------------------------------------------------------------------------------------------------------------------------------------------------------------------------------------------------------------------|---------------------------------------------------------------------------------------------------------------------------------------------------------------------------------------------------------------------------------------------------------------|-----------------------------------------------------------------------------------------------------------------------------------------------------------------------------------------------------------------------------------------------------------------|

|             |           |        |              |          |                   |         |                                                                                                                                                                                                                                                                                                          |           |                                                      |        |      |                            |                                                                                                                                                                                                                                                                                                                            |                                                                                                                                                                                                                                                               |                                                                                                                                                                                                                                                                 |
|-------------|-----------|--------|--------------|----------|-------------------|---------|----------------------------------------------------------------------------------------------------------------------------------------------------------------------------------------------------------------------------------------------------------------------------------------------------------|-----------|------------------------------------------------------|--------|------|----------------------------|----------------------------------------------------------------------------------------------------------------------------------------------------------------------------------------------------------------------------------------------------------------------------------------------------------------------------|---------------------------------------------------------------------------------------------------------------------------------------------------------------------------------------------------------------------------------------------------------------|-----------------------------------------------------------------------------------------------------------------------------------------------------------------------------------------------------------------------------------------------------------------|
| 205466_s_at | NM_005114 | HS3ST1 | Homo sapiens | 6-Oct-14 | Exemplar sequence | GenBank | gb:NM_005114.1 /DEF=Homo sapiens heparan sulfate (glucosamine) 3-O-sulfotransferase 1 (HS3ST1), mRNA. /FEA=mRNA /GEN=HS3ST1 /PROD=heparan sulfate D-glucosaminyl3-O-sulfotransferase 1 precursor /DB_XREF=gj:4826763 /UG=Hs.40968 heparan sulfate (glucosamine) 3-O-sulfotransferase 1 /FL=gb:AF019386.1 | NM_005114 | heparan sulfate (glucosamine) 3-O-sulfotransferase 1 | HS3ST1 | 9957 | NM_005114 /// XM_005248221 | 0005975 // carbohydrate metabolic process // traceable author statement /// 0006024 // glycosaminoglycan biosynthetic process // traceable author statement /// 0030203 // glycosaminoglycan metabolic process // traceable author statement /// 0044281 // small molecule metabolic process // traceable author statement | 0005737 // cytoplasm // inferred from direct assay /// 0005794 // Golgi apparatus // inferred from electronic annotation /// 0005796 // Golgi lumen // traceable author statement /// 0016021 // integral component of membrane // traceable author statement | 0008146 // sulfotransferase activity // traceable author statement /// 0008467 // [heparan sulfate]-glucosamine 3-sulfotransferase 1 activity // inferred from electronic annotation /// 0016740 // transferase activity // inferred from electronic annotation |
|-------------|-----------|--------|--------------|----------|-------------------|---------|----------------------------------------------------------------------------------------------------------------------------------------------------------------------------------------------------------------------------------------------------------------------------------------------------------|-----------|------------------------------------------------------|--------|------|----------------------------|----------------------------------------------------------------------------------------------------------------------------------------------------------------------------------------------------------------------------------------------------------------------------------------------------------------------------|---------------------------------------------------------------------------------------------------------------------------------------------------------------------------------------------------------------------------------------------------------------|-----------------------------------------------------------------------------------------------------------------------------------------------------------------------------------------------------------------------------------------------------------------|

|           |           |        |              |          |                   |         |                                                                                                                                                                                                                                                                              |           |                                             |        |       |                                                                       |                                                                                                                                                                                                                                                                                                                                                                                                                                                          |                                                                        |                                                                                                                                               |
|-----------|-----------|--------|--------------|----------|-------------------|---------|------------------------------------------------------------------------------------------------------------------------------------------------------------------------------------------------------------------------------------------------------------------------------|-----------|---------------------------------------------|--------|-------|-----------------------------------------------------------------------|----------------------------------------------------------------------------------------------------------------------------------------------------------------------------------------------------------------------------------------------------------------------------------------------------------------------------------------------------------------------------------------------------------------------------------------------------------|------------------------------------------------------------------------|-----------------------------------------------------------------------------------------------------------------------------------------------|
| 205937_at | NM_006569 | CGREF1 | Homo sapiens | 6-Oct-14 | Exemplar sequence | GenBank | gb:NM_006569.1 /DEF=Homo sapiens cell growth regulatory with EF-hand domain (CGR11), mRNA. /FEA=mRNA /GEN=CGR11 /PROD=cell growth regulatory with EF-hand domain /DB_XREF=gi:5729762 /UG=Hs.159525 cell growth regulatory with EF-hand domain /FL=gb:U66468.1 gb:NM_006569.1 | NM_006569 | cell growth regulator with EF-hand domain 1 | CGREF1 | 10669 | NM_001166239 ///<br>NM_001166240 ///<br>NM_001166241 ///<br>NM_006569 | 0006950 // response to stress // traceable author statement /// 0007049 // cell cycle // inferred from electronic annotation /// 0007050 // cell cycle arrest // inferred from electronic annotation /// 0007155 // cell adhesion // inferred from electronic annotation /// 0008285 // negative regulation of cell proliferation // traceable author statement /// 0030308 // negative regulation of cell growth // inferred from electronic annotation | 0005576 // extracellular region // inferred from electronic annotation | 0005509 // calcium ion binding // inferred from electronic annotation /// 0046872 // metal ion binding // inferred from electronic annotation |
|-----------|-----------|--------|--------------|----------|-------------------|---------|------------------------------------------------------------------------------------------------------------------------------------------------------------------------------------------------------------------------------------------------------------------------------|-----------|---------------------------------------------|--------|-------|-----------------------------------------------------------------------|----------------------------------------------------------------------------------------------------------------------------------------------------------------------------------------------------------------------------------------------------------------------------------------------------------------------------------------------------------------------------------------------------------------------------------------------------------|------------------------------------------------------------------------|-----------------------------------------------------------------------------------------------------------------------------------------------|

|           |           |       |              |          |                   |         |                                                                                                                                                                                                                               |           |                              |       |      |                            |                                                                                                                                                                                                                                                                                                                                                                                                                                                                                                                                                                                                                          |                                                                                                                                                                                                                       |                                                                                                                                                  |
|-----------|-----------|-------|--------------|----------|-------------------|---------|-------------------------------------------------------------------------------------------------------------------------------------------------------------------------------------------------------------------------------|-----------|------------------------------|-------|------|----------------------------|--------------------------------------------------------------------------------------------------------------------------------------------------------------------------------------------------------------------------------------------------------------------------------------------------------------------------------------------------------------------------------------------------------------------------------------------------------------------------------------------------------------------------------------------------------------------------------------------------------------------------|-----------------------------------------------------------------------------------------------------------------------------------------------------------------------------------------------------------------------|--------------------------------------------------------------------------------------------------------------------------------------------------|
| 206189_at | NM_003728 | UNC5C | Homo sapiens | 6-Oct-14 | Exemplar sequence | GenBank | gb:NM_003728.1 /DEF=Homo sapiens unc5 (C.elegans homolog) c (UNC5C), mRNA. /FEA=mRNA /GEN=UNC5C /PROD=unc5 (C.elegans homolog) c /DB_XREF=gi:4507836 /UG=Hs.44553 unc5 (C.elegans homolog) c /FL=gb:AF055634.1 gb:NM_003728.1 | NM_003728 | unc-5 homolog C (C. elegans) | UNC5C | 8633 | NM_003728 /// XM_005263321 | 0006915 // apoptotic process // inferred from electronic annotation /// 0007165 // signal transduction // inferred from electronic annotation /// 0007275 // multicellular organismal development // inferred from electronic annotation /// 0007411 // axon guidance // traceable author statement /// 0007420 // brain development // inferred from electronic annotation /// 0030334 // regulation of cell migration // inferred from electronic annotation /// 0033564 // anterior/posterior axon guidance // inferred from electronic annotation /// 0038007 // netrin-activated signaling pathway // inferred from | 0005886 // plasma membrane // inferred from electronic annotation /// 0016020 // membrane // inferred from electronic annotation /// 0016021 // integral component of membrane // inferred from electronic annotation | 0005042 // netrin receptor activity // inferred from electronic annotation /// 0005515 // protein binding // inferred from electronic annotation |
|-----------|-----------|-------|--------------|----------|-------------------|---------|-------------------------------------------------------------------------------------------------------------------------------------------------------------------------------------------------------------------------------|-----------|------------------------------|-------|------|----------------------------|--------------------------------------------------------------------------------------------------------------------------------------------------------------------------------------------------------------------------------------------------------------------------------------------------------------------------------------------------------------------------------------------------------------------------------------------------------------------------------------------------------------------------------------------------------------------------------------------------------------------------|-----------------------------------------------------------------------------------------------------------------------------------------------------------------------------------------------------------------------|--------------------------------------------------------------------------------------------------------------------------------------------------|

|             |           |      |              |          |                   |         |                                                                                                                                                                                       |           |                    |      |      |           |                                                                                                                                                                                                                                                                  |                                                                                                                                                                                                                                                     |                                                                                                                                                                                                                             |
|-------------|-----------|------|--------------|----------|-------------------|---------|---------------------------------------------------------------------------------------------------------------------------------------------------------------------------------------|-----------|--------------------|------|------|-----------|------------------------------------------------------------------------------------------------------------------------------------------------------------------------------------------------------------------------------------------------------------------|-----------------------------------------------------------------------------------------------------------------------------------------------------------------------------------------------------------------------------------------------------|-----------------------------------------------------------------------------------------------------------------------------------------------------------------------------------------------------------------------------|
| 206461_x_at | NM_005951 | MT1H | Homo sapiens | 6-Oct-14 | Exemplar sequence | GenBank | gb:NM_005951.1 /DEF=Homo sapiens metallothionein 1H (MT1H), mRNA. /FEA=mRNA /GEN=MT1H /PROD=metallothionein 1H /DB_XREF=gi:10835084 /UG=Hs.2667 metallothionein 1H /FL=gb:NM_005951.1 | NM_005951 | metallothionein 1H | MT1H | 4496 | NM_005951 | 0045926 // negative regulation of growth // inferred from sequence or structural similarity /// 0071276 // cellular response to cadmium ion // inferred from expression pattern /// 0071294 // cellular response to zinc ion // inferred from expression pattern | 0005634 // nucleus // inferred from sequence or structural similarity /// 0005737 // cytoplasm // inferred from sequence or structural similarity /// 0048471 // perinuclear region of cytoplasm // inferred from sequence or structural similarity | 0005515 // protein binding // inferred from physical interaction /// 0008270 // zinc ion binding // inferred from sequence or structural similarity /// 0046872 // metal ion binding // inferred from electronic annotation |
|-------------|-----------|------|--------------|----------|-------------------|---------|---------------------------------------------------------------------------------------------------------------------------------------------------------------------------------------|-----------|--------------------|------|------|-----------|------------------------------------------------------------------------------------------------------------------------------------------------------------------------------------------------------------------------------------------------------------------|-----------------------------------------------------------------------------------------------------------------------------------------------------------------------------------------------------------------------------------------------------|-----------------------------------------------------------------------------------------------------------------------------------------------------------------------------------------------------------------------------|

|           |           |      |              |          |                   |         |                                                                                                                                                                                                                                                                           |           |                                             |      |      |                                                |                                                                                                                                                                                                                                                                                                                                                                                                                                                                                                                                                                                                                                                                |                                                                                                                                                                                                                                                                                                                                                                                            |                                                                                                                                                                                                                                                                                                                                                                                                                                                                                                                                                                                                                                                                                                   |
|-----------|-----------|------|--------------|----------|-------------------|---------|---------------------------------------------------------------------------------------------------------------------------------------------------------------------------------------------------------------------------------------------------------------------------|-----------|---------------------------------------------|------|------|------------------------------------------------|----------------------------------------------------------------------------------------------------------------------------------------------------------------------------------------------------------------------------------------------------------------------------------------------------------------------------------------------------------------------------------------------------------------------------------------------------------------------------------------------------------------------------------------------------------------------------------------------------------------------------------------------------------------|--------------------------------------------------------------------------------------------------------------------------------------------------------------------------------------------------------------------------------------------------------------------------------------------------------------------------------------------------------------------------------------------|---------------------------------------------------------------------------------------------------------------------------------------------------------------------------------------------------------------------------------------------------------------------------------------------------------------------------------------------------------------------------------------------------------------------------------------------------------------------------------------------------------------------------------------------------------------------------------------------------------------------------------------------------------------------------------------------------|
| 206553_at | NM_002535 | OAS2 | Homo sapiens | 6-Oct-14 | Exemplar sequence | GenBank | gb:NM_002535.1 /DEF=Homo sapiens 2-5oligoadenylate synthetase 2 (OAS2), transcript variant 2, mRNA. /FEA=mRNA /GEN=OAS2 /PROD=2-5oligoadenylate synthetase 2, isoform p69 /DB_XREF=gi:4505484 /UG=Hs.264981 2-5oligoadenylate synthetase 2 /FL=gb:M87284.1 gb:NM_002535.1 | NM_002535 | 2'-5'-oligoadenylate synthetase 2, 69/71kDa | OAS2 | 4939 | NM_001032731<br>/// NM_002535<br>/// NM_016817 | 0002376 // immune system process // inferred from electronic annotation /// 0006139 // nucleobase-containing compound metabolic process // traceable author statement /// 0006164 // purine nucleotide biosynthetic process // inferred from direct assay /// 0006401 // RNA catabolic process // inferred from electronic annotation /// 0006486 // protein glycosylation // inferred from direct assay /// 0006955 // immune response // inferred from electronic annotation /// 0008152 // metabolic process // inferred from electronic annotation /// 0009615 // response to virus // traceable author statement /// 0018377 // protein myristoylation // | 0005634 // nucleus // inferred from electronic annotation /// 0005737 // cytoplasm // inferred from direct assay /// 0005739 // mitochondrion // inferred from electronic annotation /// 0005783 // endoplasmic reticulum // inferred from electronic annotation /// 0005829 // cytosol // traceable author statement /// 0016020 // membrane // traceable author statement /// 0043231 // | 0000166 // nucleotide binding // inferred from electronic annotation /// 0001730 // 2'-5'-oligoadenylate synthetase activity // inferred from direct assay /// 0001730 // 2'-5'-oligoadenylate synthetase activity // inferred from mutant phenotype /// 0003723 // RNA binding // inferred from electronic annotation /// 0003725 // double-stranded RNA binding // inferred from direct assay /// 0003725 // double-stranded RNA binding // inferred from mutant phenotype /// 0005524 // ATP binding // inferred from mutant phenotype /// 0008270 // zinc ion binding // inferred from direct assay /// 0016740 // transferase activity // inferred from electronic annotation /// 0016779 // |
|-----------|-----------|------|--------------|----------|-------------------|---------|---------------------------------------------------------------------------------------------------------------------------------------------------------------------------------------------------------------------------------------------------------------------------|-----------|---------------------------------------------|------|------|------------------------------------------------|----------------------------------------------------------------------------------------------------------------------------------------------------------------------------------------------------------------------------------------------------------------------------------------------------------------------------------------------------------------------------------------------------------------------------------------------------------------------------------------------------------------------------------------------------------------------------------------------------------------------------------------------------------------|--------------------------------------------------------------------------------------------------------------------------------------------------------------------------------------------------------------------------------------------------------------------------------------------------------------------------------------------------------------------------------------------|---------------------------------------------------------------------------------------------------------------------------------------------------------------------------------------------------------------------------------------------------------------------------------------------------------------------------------------------------------------------------------------------------------------------------------------------------------------------------------------------------------------------------------------------------------------------------------------------------------------------------------------------------------------------------------------------------|



|           |           |      |              |          |                   |         |                                                                                                                                                                                                 |           |                       |      |       |                            |                                                                                                                                                                                                                                                                                                                                                                                                                                                                                                                                                                                               |                                                                                                                                                                                                                                                                                                                                                               |                                                                                                                                                                                                                     |
|-----------|-----------|------|--------------|----------|-------------------|---------|-------------------------------------------------------------------------------------------------------------------------------------------------------------------------------------------------|-----------|-----------------------|------|-------|----------------------------|-----------------------------------------------------------------------------------------------------------------------------------------------------------------------------------------------------------------------------------------------------------------------------------------------------------------------------------------------------------------------------------------------------------------------------------------------------------------------------------------------------------------------------------------------------------------------------------------------|---------------------------------------------------------------------------------------------------------------------------------------------------------------------------------------------------------------------------------------------------------------------------------------------------------------------------------------------------------------|---------------------------------------------------------------------------------------------------------------------------------------------------------------------------------------------------------------------|
| 206584_at | NM_015364 | LY96 | Homo sapiens | 6-Oct-14 | Exemplar sequence | GenBank | gb:NM_015364.1 /DEF=Homo sapiens MD-2 protein (MD-2), mRNA. /FEA=mRNA /GEN=MD-2 /PROD=MD-2 protein /DB_XREF=gi:7662503 /UG=Hs.69328 MD-2 protein /FL=gb:AB018549.1 gb:NM_015364.1 gb:AF168121.1 | NM_015364 | lymphocyte antigen 96 | LY96 | 23643 | NM_001195797 /// NM_015364 | 0002224 // toll-like receptor signaling pathway // traceable author statement /// 0002376 // immune system process // inferred from electronic annotation /// 0002755 // MyD88-dependent toll-like receptor signaling pathway // traceable author statement /// 0002756 // MyD88-independent toll-like receptor signaling pathway // traceable author statement /// 0006954 // inflammatory response // inferred from electronic annotation /// 0006968 // cellular defense response // traceable author statement /// 0007166 // cell surface receptor signaling pathway // traceable author | 0005576 // extracellular region // inferred from electronic annotation /// 0005615 // extracellular space // inferred from electronic annotation /// 0005886 // plasma membrane // traceable author statement /// 0010008 // endosome membrane // traceable author statement /// 0046696 // lipopolysaccharide receptor complex // inferred from direct assay | 0001875 // lipopolysaccharide receptor activity // inferred from direct assay /// 0005515 // protein binding // inferred from physical interaction /// 0015026 // coreceptor activity // traceable author statement |
|-----------|-----------|------|--------------|----------|-------------------|---------|-------------------------------------------------------------------------------------------------------------------------------------------------------------------------------------------------|-----------|-----------------------|------|-------|----------------------------|-----------------------------------------------------------------------------------------------------------------------------------------------------------------------------------------------------------------------------------------------------------------------------------------------------------------------------------------------------------------------------------------------------------------------------------------------------------------------------------------------------------------------------------------------------------------------------------------------|---------------------------------------------------------------------------------------------------------------------------------------------------------------------------------------------------------------------------------------------------------------------------------------------------------------------------------------------------------------|---------------------------------------------------------------------------------------------------------------------------------------------------------------------------------------------------------------------|

|           |           |    |              |          |                   |         |                                                                                                                                                                                                                                                                     |           |                         |    |      |           |                                                                                                                               |                                                                                                                                        |                                                                                                                                    |
|-----------|-----------|----|--------------|----------|-------------------|---------|---------------------------------------------------------------------------------------------------------------------------------------------------------------------------------------------------------------------------------------------------------------------|-----------|-------------------------|----|------|-----------|-------------------------------------------------------------------------------------------------------------------------------|----------------------------------------------------------------------------------------------------------------------------------------|------------------------------------------------------------------------------------------------------------------------------------|
| 206698_at | NM_021083 | XK | Homo sapiens | 6-Oct-14 | Exemplar sequence | GenBank | gb:NM_021083.1 /DEF=Homo sapiens Kell blood group precursor (McLeod phenotype) (XK), mRNA. /FEA=mRNA /GEN=XK /PROD=Kell blood group precursor (McLeod phenotype) /DB_XREF=gi:10835266 /UG=Hs.78919 Kell blood group precursor (McLeod phenotype) /FL=gb:NM_021083.1 | NM_021083 | X-linked Kx blood group | XK | 7504 | NM_021083 | 0006810 // transport // traceable author statement /// 0006865 // amino acid transport // inferred from electronic annotation | 0016020 // membrane // inferred from electronic annotation /// 0016021 // integral component of membrane // traceable author statement | 0005215 // transporter activity // traceable author statement /// 0005515 // protein binding // inferred from physical interaction |
|-----------|-----------|----|--------------|----------|-------------------|---------|---------------------------------------------------------------------------------------------------------------------------------------------------------------------------------------------------------------------------------------------------------------------|-----------|-------------------------|----|------|-----------|-------------------------------------------------------------------------------------------------------------------------------|----------------------------------------------------------------------------------------------------------------------------------------|------------------------------------------------------------------------------------------------------------------------------------|

|           |           |       |              |          |                   |         |                                                                                                                                                                                                               |           |                                |       |      |                                             |                                                                                                                                                                                                                                                                                                                                                                                                                                                                                                                                                                                                                                                 |                                                                                                                                                                                                                                                                                                                                                                                                                                 |                                                                                                                                                                                                                                                                                                                                                                                                                                                                                                                                                                                                                                                                                                                                                                                   |
|-----------|-----------|-------|--------------|----------|-------------------|---------|---------------------------------------------------------------------------------------------------------------------------------------------------------------------------------------------------------------|-----------|--------------------------------|-------|------|---------------------------------------------|-------------------------------------------------------------------------------------------------------------------------------------------------------------------------------------------------------------------------------------------------------------------------------------------------------------------------------------------------------------------------------------------------------------------------------------------------------------------------------------------------------------------------------------------------------------------------------------------------------------------------------------------------|---------------------------------------------------------------------------------------------------------------------------------------------------------------------------------------------------------------------------------------------------------------------------------------------------------------------------------------------------------------------------------------------------------------------------------|-----------------------------------------------------------------------------------------------------------------------------------------------------------------------------------------------------------------------------------------------------------------------------------------------------------------------------------------------------------------------------------------------------------------------------------------------------------------------------------------------------------------------------------------------------------------------------------------------------------------------------------------------------------------------------------------------------------------------------------------------------------------------------------|
| 206871_at | NM_001972 | ELANE | Homo sapiens | 6-Oct-14 | Exemplar sequence | GenBank | gb:NM_001972.1 /DEF=Homo sapiens elastase 2, neutrophil (ELA2), mRNA. /FEA=mRNA /GEN=ELA2 /PROD=elastase 2, neutrophil /DB_XREF=gi:4503548 /UG=Hs.99863 elastase 2, neutrophil /FL=gb:M34379.1 gb:NM_001972.1 | NM_001972 | elastase, neutrophil expressed | ELANE | 1991 | NM_001972 /// XM_005259517 /// XM_006725397 | 0000122 // negative regulation of transcription from RNA polymerase II promoter // inferred from mutant phenotype /// 0001878 // response to yeast // inferred from electronic annotation /// 0002438 // acute inflammatory response to antigenic stimulus // inferred from electronic annotation /// 0006508 // proteolysis // inferred from direct assay /// 0006874 // cellular calcium ion homeostasis // non-traceable author statement /// 0006909 // phagocytosis // inferred from electronic annotation /// 0009411 // response to UV // inferred from direct assay /// 0022617 // extracellular matrix disassembly // traceable author | 0005576 // extracellular region // non-traceable author statement /// 0005576 // extracellular region // traceable author statement /// 0005737 // cytoplasm // inferred from direct assay /// 0009986 // cell surface // inferred from direct assay /// 0017053 // transcriptional repressor complex // inferred from direct assay /// 0030141 // secretory granule // inferred from direct assay /// 0070062 // extracellular | 0001106 // RNA polymerase II transcription corepressor activity // inferred from mutant phenotype /// 0002020 // protease binding // inferred from physical interaction /// 0003824 // catalytic activity // inferred from electronic annotation /// 0004175 // endopeptidase activity // inferred from direct assay /// 0004252 // serine-type endopeptidase activity // inferred from electronic annotation /// 0005515 // protein binding // inferred from physical interaction /// 0008201 // heparin binding // inferred from direct assay /// 0008233 // peptidase activity // inferred from direct assay /// 0008236 // serine-type peptidase activity // inferred from electronic annotation /// 0016787 // hydrolase activity // inferred from electronic annotation /// |
|-----------|-----------|-------|--------------|----------|-------------------|---------|---------------------------------------------------------------------------------------------------------------------------------------------------------------------------------------------------------------|-----------|--------------------------------|-------|------|---------------------------------------------|-------------------------------------------------------------------------------------------------------------------------------------------------------------------------------------------------------------------------------------------------------------------------------------------------------------------------------------------------------------------------------------------------------------------------------------------------------------------------------------------------------------------------------------------------------------------------------------------------------------------------------------------------|---------------------------------------------------------------------------------------------------------------------------------------------------------------------------------------------------------------------------------------------------------------------------------------------------------------------------------------------------------------------------------------------------------------------------------|-----------------------------------------------------------------------------------------------------------------------------------------------------------------------------------------------------------------------------------------------------------------------------------------------------------------------------------------------------------------------------------------------------------------------------------------------------------------------------------------------------------------------------------------------------------------------------------------------------------------------------------------------------------------------------------------------------------------------------------------------------------------------------------|

|           |           |        |              |          |                   |         |                                                                                                                                                                                                                                                                    |           |                         |        |      |                            |                                                                                                                                                                                                                                                                                                                                                                                                                                                                                                                           |                                                                                                                               |                                                                                                                                                                                                                  |
|-----------|-----------|--------|--------------|----------|-------------------|---------|--------------------------------------------------------------------------------------------------------------------------------------------------------------------------------------------------------------------------------------------------------------------|-----------|-------------------------|--------|------|----------------------------|---------------------------------------------------------------------------------------------------------------------------------------------------------------------------------------------------------------------------------------------------------------------------------------------------------------------------------------------------------------------------------------------------------------------------------------------------------------------------------------------------------------------------|-------------------------------------------------------------------------------------------------------------------------------|------------------------------------------------------------------------------------------------------------------------------------------------------------------------------------------------------------------|
| 206931_at | NM_003441 | ZNF141 | Homo sapiens | 6-Oct-14 | Exemplar sequence | GenBank | gb:NM_003441.1 /DEF=Homo sapiens zinc finger protein 141 (clone pHZ-44) (ZNF141), mRNA. /FEA=mRNA /GEN=ZNF141 /PROD=zinc finger protein 141 (clone pHZ-44) /DB_XREF=gi:4507992 /UG=Hs.193677 zinc finger protein 141 (clone pHZ-44) /FL=gb:L15309.1 gb:NM_003441.1 | NM_003441 | zinc finger protein 141 | ZNF141 | 7700 | NM_003441 /// XM_005278365 | 0006351 // transcription, DNA-templated // inferred from electronic annotation /// 0006355 // regulation of transcription, DNA-templated // inferred from electronic annotation /// 0006366 // transcription from RNA polymerase II promoter // traceable author statement /// 0007275 // multicellular organismal development // inferred from electronic annotation /// 0009653 // anatomical structure morphogenesis // traceable author statement /// 0035108 // limb morphogenesis // inferred from mutant phenotype | 0005622 // intracellular // inferred from electronic annotation /// 0005634 // nucleus // inferred from electronic annotation | 0003676 // nucleic acid binding // inferred from electronic annotation /// 0003677 // DNA binding // inferred from electronic annotation /// 0046872 // metal ion binding // inferred from electronic annotation |
|-----------|-----------|--------|--------------|----------|-------------------|---------|--------------------------------------------------------------------------------------------------------------------------------------------------------------------------------------------------------------------------------------------------------------------|-----------|-------------------------|--------|------|----------------------------|---------------------------------------------------------------------------------------------------------------------------------------------------------------------------------------------------------------------------------------------------------------------------------------------------------------------------------------------------------------------------------------------------------------------------------------------------------------------------------------------------------------------------|-------------------------------------------------------------------------------------------------------------------------------|------------------------------------------------------------------------------------------------------------------------------------------------------------------------------------------------------------------|

|           |           |      |              |          |                   |         |                                                                                                                                                                                                                                           |           |                                  |      |        |                                     |                                                                                                                                                                                                                                                                                                                                                                                                                                                                                                                                                                                                                                                             |                                                                                                                                                                                                                                                                                                                                                                                               |                                                                                                                                                                                                                                                                                                                                                                                                                                                                                                                        |
|-----------|-----------|------|--------------|----------|-------------------|---------|-------------------------------------------------------------------------------------------------------------------------------------------------------------------------------------------------------------------------------------------|-----------|----------------------------------|------|--------|-------------------------------------|-------------------------------------------------------------------------------------------------------------------------------------------------------------------------------------------------------------------------------------------------------------------------------------------------------------------------------------------------------------------------------------------------------------------------------------------------------------------------------------------------------------------------------------------------------------------------------------------------------------------------------------------------------------|-----------------------------------------------------------------------------------------------------------------------------------------------------------------------------------------------------------------------------------------------------------------------------------------------------------------------------------------------------------------------------------------------|------------------------------------------------------------------------------------------------------------------------------------------------------------------------------------------------------------------------------------------------------------------------------------------------------------------------------------------------------------------------------------------------------------------------------------------------------------------------------------------------------------------------|
| 206978_at | NM_000647 | CCR2 | Homo sapiens | 6-Oct-14 | Exemplar sequence | GenBank | gb:NM_000647.2 /DEF=Homo sapiens chemokine (C-C motif) receptor 2 (CCR2), mRNA. /FEA=mRNA /GEN=CCR2 /PROD=chemokine (C-C motif) receptor 2 /DB_XREF=gi:4827072 /UG=Hs.395 chemokine (C-C motif) receptor 2 /FL=gb:U03882.1 gb:NM_000647.2 | NM_000647 | chemokine (C-C motif) receptor 2 | CCR2 | 729230 | NM_001123041<br>///<br>NM_001123396 | 0001974 // blood vessel remodeling // inferred from sequence or structural similarity /// 0002407 // dendritic cell chemotaxis // traceable author statement /// 0002827 // positive regulation of T-helper 1 type immune response // inferred from sequence or structural similarity /// 0002829 // negative regulation of type 2 immune response // inferred from sequence or structural similarity /// 0006874 // cellular calcium ion homeostasis // inferred from sequence or structural similarity /// 0006935 // chemotaxis // traceable author statement /// 0006954 // inflammatory response // inferred from electronic annotation /// 0006955 // | 0005737 // cytoplasm // inferred from direct assay /// 0005829 // cytosol // inferred from sequence or structural similarity /// 0005886 // plasma membrane // inferred from direct assay /// 0005886 // plasma membrane // traceable author statement /// 0005887 // integral component of plasma membrane // traceable author statement /// 0016020 // membrane // inferred from electronic | 0004871 // signal transducer activity // inferred from electronic annotation /// 0004930 // G-protein coupled receptor activity // inferred from electronic annotation /// 0004950 // chemokine receptor activity // traceable author statement /// 0016493 // C-C chemokine receptor activity // inferred from electronic annotation /// 0031727 // CCR2 chemokine receptor binding // inferred from direct assay /// 0042803 // protein homodimerization activity // inferred from sequence or structural similarity |
|-----------|-----------|------|--------------|----------|-------------------|---------|-------------------------------------------------------------------------------------------------------------------------------------------------------------------------------------------------------------------------------------------|-----------|----------------------------------|------|--------|-------------------------------------|-------------------------------------------------------------------------------------------------------------------------------------------------------------------------------------------------------------------------------------------------------------------------------------------------------------------------------------------------------------------------------------------------------------------------------------------------------------------------------------------------------------------------------------------------------------------------------------------------------------------------------------------------------------|-----------------------------------------------------------------------------------------------------------------------------------------------------------------------------------------------------------------------------------------------------------------------------------------------------------------------------------------------------------------------------------------------|------------------------------------------------------------------------------------------------------------------------------------------------------------------------------------------------------------------------------------------------------------------------------------------------------------------------------------------------------------------------------------------------------------------------------------------------------------------------------------------------------------------------|

|             |           |       |              |          |                   |         |                                                                                                                                                                                                        |           |                           |       |       |                                                                               |                                                                                                                                                          |                                                                                                                               |                                                                                                                                                                                                                                                                                                             |
|-------------|-----------|-------|--------------|----------|-------------------|---------|--------------------------------------------------------------------------------------------------------------------------------------------------------------------------------------------------------|-----------|---------------------------|-------|-------|-------------------------------------------------------------------------------|----------------------------------------------------------------------------------------------------------------------------------------------------------|-------------------------------------------------------------------------------------------------------------------------------|-------------------------------------------------------------------------------------------------------------------------------------------------------------------------------------------------------------------------------------------------------------------------------------------------------------|
| 207090_x_at | NM_014898 | ZFP30 | Homo sapiens | 6-Oct-14 | Exemplar sequence | GenBank | gb:NM_014898.1 /DEF=Homo sapiens KIAA0961 protein (KIAA0961), mRNA. /FEA=mRNA /GEN=KIAA0961 /PROD=KIAA0961 protein /DB_XREF=gi:7662407 /UG=Hs.189464 KIAA0961 protein /FL=gb:AB023178.1 gb:NM_014898.1 | NM_014898 | ZFP30 zinc finger protein | ZFP30 | 22835 | NM_014898 /// XM_005258665 /// XM_006723087 /// XM_006723088 /// XM_006723089 | 0006351 // transcription, DNA-templated // inferred from electronic annotation /// 0006355 // regulation of transcription, DNA-templated // not recorded | 0005622 // intracellular // inferred from electronic annotation /// 0005634 // nucleus // inferred from electronic annotation | 0003676 // nucleic acid binding // inferred from electronic annotation /// 0003677 // DNA binding // inferred from electronic annotation /// 0003700 // sequence-specific DNA binding transcription factor activity // not recorded /// 0046872 // metal ion binding // inferred from electronic annotation |
|-------------|-----------|-------|--------------|----------|-------------------|---------|--------------------------------------------------------------------------------------------------------------------------------------------------------------------------------------------------------|-----------|---------------------------|-------|-------|-------------------------------------------------------------------------------|----------------------------------------------------------------------------------------------------------------------------------------------------------|-------------------------------------------------------------------------------------------------------------------------------|-------------------------------------------------------------------------------------------------------------------------------------------------------------------------------------------------------------------------------------------------------------------------------------------------------------|

|             |           |         |              |          |                   |         |                                                                                                                                                                                                                                                                                                                     |           |                                                                     |         |      |                                                           |                                                                                                                                                                                                                                                                                                                                                                                                                                                                                                                                                                                                                                               |                                                                                                                  |                                                                                                                                                                                                                                                                                                             |
|-------------|-----------|---------|--------------|----------|-------------------|---------|---------------------------------------------------------------------------------------------------------------------------------------------------------------------------------------------------------------------------------------------------------------------------------------------------------------------|-----------|---------------------------------------------------------------------|---------|------|-----------------------------------------------------------|-----------------------------------------------------------------------------------------------------------------------------------------------------------------------------------------------------------------------------------------------------------------------------------------------------------------------------------------------------------------------------------------------------------------------------------------------------------------------------------------------------------------------------------------------------------------------------------------------------------------------------------------------|------------------------------------------------------------------------------------------------------------------|-------------------------------------------------------------------------------------------------------------------------------------------------------------------------------------------------------------------------------------------------------------------------------------------------------------|
| 207122_x_at | NM_001054 | SULT1A2 | Homo sapiens | 6-Oct-14 | Exemplar sequence | GenBank | gb:NM_001054.1 /DEF=Homo sapiens sulfotransferase family, cytosolic, 1A, phenol-preferring, member 2 (SULT1A2), mRNA. /FEA=mRNA /GEN=SULT1A2 /PROD=sulfotransferase family, cytosolic, 1A, phenol-preferring, member 2 /DB_XREF=gi:4507302 /UG=Hs.272462 sulfotransferase family, cytosolic, 1A, phenol-preferring, | NM_001054 | sulfotransferase family, cytosolic, 1A, phenol-preferring, member 2 | SULT1A2 | 6799 | NM_001054 /// NM_177528 /// XM_006721076 /// XM_006721077 | 0006584 // catecholamine metabolic process // inferred from electronic annotation /// 0006629 // lipid metabolic process // inferred from electronic annotation /// 0006805 // xenobiotic metabolic process // inferred from direct assay /// 0006805 // xenobiotic metabolic process // traceable author statement /// 0008152 // metabolic process // inferred from electronic annotation /// 0008202 // steroid metabolic process // inferred from electronic annotation /// 0009309 // amine biosynthetic process // traceable author statement /// 0018958 // phenol-containing compound metabolic process // inferred from direct assay | 0005737 // cytoplasm // inferred from electronic annotation /// 0005829 // cytosol // traceable author statement | 0004062 // aryl sulfotransferase activity // inferred from direct assay /// 0008146 // sulfotransferase activity // traceable author statement /// 0016740 // transferase activity // inferred from electronic annotation /// 0047894 // flavonol 3-sulfotransferase activity // inferred from direct assay |
|-------------|-----------|---------|--------------|----------|-------------------|---------|---------------------------------------------------------------------------------------------------------------------------------------------------------------------------------------------------------------------------------------------------------------------------------------------------------------------|-----------|---------------------------------------------------------------------|---------|------|-----------------------------------------------------------|-----------------------------------------------------------------------------------------------------------------------------------------------------------------------------------------------------------------------------------------------------------------------------------------------------------------------------------------------------------------------------------------------------------------------------------------------------------------------------------------------------------------------------------------------------------------------------------------------------------------------------------------------|------------------------------------------------------------------------------------------------------------------|-------------------------------------------------------------------------------------------------------------------------------------------------------------------------------------------------------------------------------------------------------------------------------------------------------------|

|             |           |       |              |          |                   |         |                                                                                                                                                                                                                                                                                        |           |                                                                                                      |                  |                     |                                                                                                                                                                                                                                                          |                                                                                                                                                                                                                                                                                                                                           |                                                                                                                                                                                                                                                                                                                                                                                                      |                                                                                                                                                                                                                                                                               |
|-------------|-----------|-------|--------------|----------|-------------------|---------|----------------------------------------------------------------------------------------------------------------------------------------------------------------------------------------------------------------------------------------------------------------------------------------|-----------|------------------------------------------------------------------------------------------------------|------------------|---------------------|----------------------------------------------------------------------------------------------------------------------------------------------------------------------------------------------------------------------------------------------------------|-------------------------------------------------------------------------------------------------------------------------------------------------------------------------------------------------------------------------------------------------------------------------------------------------------------------------------------------|------------------------------------------------------------------------------------------------------------------------------------------------------------------------------------------------------------------------------------------------------------------------------------------------------------------------------------------------------------------------------------------------------|-------------------------------------------------------------------------------------------------------------------------------------------------------------------------------------------------------------------------------------------------------------------------------|
| 207198_s_at | NM_004987 | LIMS1 | Homo sapiens | 6-Oct-14 | Exemplar sequence | GenBank | gb:NM_004987.2 /DEF=Homo sapiens LIM and senescent cell antigen-like domains 1 (LIMS1), mRNA. /FEA=mRNA /GEN=LIMS1 /PROD=LIM and senescent cell antigen-like domains 1 /DB_XREF=gi:13518025 /UG=Hs.112378 LIM and senescent cell antigen-like domains 1 /FL=gb:U09284.2 gb:NM_004987.2 | NM_004987 | LIM and senescent cell antigen-like domains 1 /// LIM and senescent cell antigen-like domains 3-like | LIMS1 /// LIMS3L | 3987 /// 10028869 5 | NM_001193482 /// NM_001193483 /// NM_001193484 /// NM_001193485 /// NM_001193488 /// NM_001205288 /// NM_004987 /// NR_038099 /// XM_005263563 /// XM_005263946 /// XM_005263947 /// XM_005263948 /// XM_005263949 /// XM_005263950 /// XM_005263951 /// | 0007569 // cell aging // traceable author statement /// 0034329 // cell junction assembly // traceable author statement /// 0045892 // negative regulation of transcription, DNA-templated // inferred from direct assay /// 0071560 // cellular response to transforming growth factor beta stimulus // inferred from expression pattern | 0005737 // cytoplasm // inferred from electronic annotation /// 0005829 // cytosol // traceable author statement /// 0005886 // plasma membrane // inferred from electronic annotation /// 0005925 // focal adhesion // inferred from direct assay /// 0016020 // membrane // inferred from electronic annotation /// 0030054 // cell junction // inferred from electronic annotation /// 0048471 // | 0005515 // protein binding // inferred from physical interaction /// 0008270 // zinc ion binding // inferred from direct assay /// 0008270 // zinc ion binding // inferred from electronic annotation /// 0046872 // metal ion binding // inferred from electronic annotation |
|-------------|-----------|-------|--------------|----------|-------------------|---------|----------------------------------------------------------------------------------------------------------------------------------------------------------------------------------------------------------------------------------------------------------------------------------------|-----------|------------------------------------------------------------------------------------------------------|------------------|---------------------|----------------------------------------------------------------------------------------------------------------------------------------------------------------------------------------------------------------------------------------------------------|-------------------------------------------------------------------------------------------------------------------------------------------------------------------------------------------------------------------------------------------------------------------------------------------------------------------------------------------|------------------------------------------------------------------------------------------------------------------------------------------------------------------------------------------------------------------------------------------------------------------------------------------------------------------------------------------------------------------------------------------------------|-------------------------------------------------------------------------------------------------------------------------------------------------------------------------------------------------------------------------------------------------------------------------------|



|             |           |         |              |          |                   |         |                                                                                                                                                                                                                                                                                                                     |           |                                                       |         |      |           |                                                                                                                                                                                                                                                                                            |                                                                                                                                                                                                                                                                                                                                           |                                                                                                                                                                                                                                                                                                                                                                                                                                          |
|-------------|-----------|---------|--------------|----------|-------------------|---------|---------------------------------------------------------------------------------------------------------------------------------------------------------------------------------------------------------------------------------------------------------------------------------------------------------------------|-----------|-------------------------------------------------------|---------|------|-----------|--------------------------------------------------------------------------------------------------------------------------------------------------------------------------------------------------------------------------------------------------------------------------------------------|-------------------------------------------------------------------------------------------------------------------------------------------------------------------------------------------------------------------------------------------------------------------------------------------------------------------------------------------|------------------------------------------------------------------------------------------------------------------------------------------------------------------------------------------------------------------------------------------------------------------------------------------------------------------------------------------------------------------------------------------------------------------------------------------|
| 207392_x_at | NM_001076 | UGT2B15 | Homo sapiens | 6-Oct-14 | Exemplar sequence | GenBank | gb:NM_001076.1 /DEF=Homo sapiens UDP glycosyltransferase 2 family, polypeptide B15 (UGT2B15), mRNA. /FEA=mRNA /GEN=UGT2B15 /PROD=UDP glycosyltransferase 2 family, polypeptide B15 /DB_XREF=gj:4507818 /UG=Hs.150207 UDP glycosyltransferase 2 family, polypeptide B15 /FL=gb:NM_001076.1 gb:U08854.1 gb:AF180322.1 | NM_001076 | UDP glucuronosyltransferase 2 family, polypeptide B15 | UGT2B15 | 7366 | NM_001076 | 0006805 // xenobiotic metabolic process // traceable author statement /// 0008152 // metabolic process // inferred from electronic annotation /// 0008202 // steroid metabolic process // traceable author statement /// 0052695 // cellular glucuronidation // inferred from direct assay | 0005783 // endoplasmic reticulum // inferred from electronic annotation /// 0005789 // endoplasmic reticulum membrane // inferred from electronic annotation /// 0016020 // membrane // inferred from electronic annotation /// 0016021 // integral component of membrane // inferred from electronic annotation /// 0031090 // organelle | 0001972 // retinoic acid binding // inferred from direct assay /// 0015020 // glucuronosyltransferase activity // inferred from direct assay /// 0016740 // transferase activity // inferred from electronic annotation /// 0016757 // transferase activity, transferring glycosyl groups // inferred from electronic annotation /// 0016758 // transferase activity, transferring hexosyl groups // inferred from electronic annotation |
|-------------|-----------|---------|--------------|----------|-------------------|---------|---------------------------------------------------------------------------------------------------------------------------------------------------------------------------------------------------------------------------------------------------------------------------------------------------------------------|-----------|-------------------------------------------------------|---------|------|-----------|--------------------------------------------------------------------------------------------------------------------------------------------------------------------------------------------------------------------------------------------------------------------------------------------|-------------------------------------------------------------------------------------------------------------------------------------------------------------------------------------------------------------------------------------------------------------------------------------------------------------------------------------------|------------------------------------------------------------------------------------------------------------------------------------------------------------------------------------------------------------------------------------------------------------------------------------------------------------------------------------------------------------------------------------------------------------------------------------------|

|           |           |           |              |          |                   |         |                                                                                                                                                                                                                                                                                 |           |                                                        |           |       |           |                                                                                                                                                                                                                                                                                                                                         |                                                                                                                                                                                                                                                                                                                                    |                                                                                                                                 |
|-----------|-----------|-----------|--------------|----------|-------------------|---------|---------------------------------------------------------------------------------------------------------------------------------------------------------------------------------------------------------------------------------------------------------------------------------|-----------|--------------------------------------------------------|-----------|-------|-----------|-----------------------------------------------------------------------------------------------------------------------------------------------------------------------------------------------------------------------------------------------------------------------------------------------------------------------------------------|------------------------------------------------------------------------------------------------------------------------------------------------------------------------------------------------------------------------------------------------------------------------------------------------------------------------------------|---------------------------------------------------------------------------------------------------------------------------------|
| 207641_at | NM_012452 | TNFRSF13B | Homo sapiens | 6-Oct-14 | Exemplar sequence | GenBank | gb:NM_012452.1 /DEF=Homo sapiens transmembrane activator and CAML interactor (TACI), mRNA. /FEA=mRNA /GEN=TACI /PROD=transmembrane activator and CAML interactor /DB_XREF=gi:6912693 /UG=Hs.158341 transmembrane activator and CAML interactor /FL=gb:AF023614.1 gb:NM_012452.1 | NM_012452 | tumor necrosis factor receptor superfamily, member 13B | TNFRSF13B | 23495 | NM_012452 | 0001782 // B cell homeostasis // inferred from electronic annotation /// 0002376 // immune system process // inferred from electronic annotation /// 0007166 // cell surface receptor signaling pathway // traceable author statement /// 0030889 // negative regulation of B cell proliferation // inferred from electronic annotation | 0005887 // integral component of plasma membrane // inferred from electronic annotation /// 0009897 // external side of plasma membrane // inferred from electronic annotation /// 0016020 // membrane // inferred from electronic annotation /// 0016021 // integral component of membrane // inferred from electronic annotation | 0004872 // receptor activity // traceable author statement /// 0005515 // protein binding // inferred from physical interaction |
|-----------|-----------|-----------|--------------|----------|-------------------|---------|---------------------------------------------------------------------------------------------------------------------------------------------------------------------------------------------------------------------------------------------------------------------------------|-----------|--------------------------------------------------------|-----------|-------|-----------|-----------------------------------------------------------------------------------------------------------------------------------------------------------------------------------------------------------------------------------------------------------------------------------------------------------------------------------------|------------------------------------------------------------------------------------------------------------------------------------------------------------------------------------------------------------------------------------------------------------------------------------------------------------------------------------|---------------------------------------------------------------------------------------------------------------------------------|

|           |           |      |              |          |                   |         |                                                                                                                                                                                                                                                          |           |                                  |      |      |                                                                                                                                                                    |                                                          |                                                                                                                                                                                                                                                                                                                                                                                        |                                                               |
|-----------|-----------|------|--------------|----------|-------------------|---------|----------------------------------------------------------------------------------------------------------------------------------------------------------------------------------------------------------------------------------------------------------|-----------|----------------------------------|------|------|--------------------------------------------------------------------------------------------------------------------------------------------------------------------|----------------------------------------------------------|----------------------------------------------------------------------------------------------------------------------------------------------------------------------------------------------------------------------------------------------------------------------------------------------------------------------------------------------------------------------------------------|---------------------------------------------------------------|
| 207674_at | NM_002000 | FCAR | Homo sapiens | 6-Oct-14 | Exemplar sequence | GenBank | gb:NM_002000.1 /DEF=Homo sapiens Fc fragment of IgA, receptor for (FCAR), mRNA. /FEA=mRNA /GEN=FCAR /PROD=Fc fragment of IgA, receptor for /DB_XREF=gi:4503672 /UG=Hs.193122 Fc fragment of IgA, receptor for /FL=gb:D87855.1 gb:D87861.1 gb:NM_002000.1 | NM_002000 | Fc fragment of IgA, receptor for | FCAR | 2204 | NM_002000 ///<br>NM_133269 ///<br>NM_133271 ///<br>NM_133272 ///<br>NM_133273 ///<br>NM_133274 ///<br>NM_133277 ///<br>NM_133278 ///<br>NM_133279 ///<br>NM_133280 | 0006955 // immune response // traceable author statement | 0005576 // extracellular region // inferred from electronic annotation ///<br>0005886 // plasma membrane // inferred from direct assay ///<br>0005887 // integral component of plasma membrane // traceable author statement ///<br>0016020 // membrane // inferred from electronic annotation ///<br>0016021 // integral component of membrane // inferred from electronic annotation | 0019862 // IgA binding // inferred from electronic annotation |
|-----------|-----------|------|--------------|----------|-------------------|---------|----------------------------------------------------------------------------------------------------------------------------------------------------------------------------------------------------------------------------------------------------------|-----------|----------------------------------|------|------|--------------------------------------------------------------------------------------------------------------------------------------------------------------------|----------------------------------------------------------|----------------------------------------------------------------------------------------------------------------------------------------------------------------------------------------------------------------------------------------------------------------------------------------------------------------------------------------------------------------------------------------|---------------------------------------------------------------|

|           |           |      |              |          |                   |         |                                                                                                                                                                                                                                                       |           |                                  |      |        |                                     |                                                                                                                                                                                                                                                                                                                                                                                                                                                                                                                                                                                                                                                             |                                                                                                                                                                                                                                                                                                                                                                                               |                                                                                                                                                                                                                                                                                                                                                                                                                                                                                                                        |
|-----------|-----------|------|--------------|----------|-------------------|---------|-------------------------------------------------------------------------------------------------------------------------------------------------------------------------------------------------------------------------------------------------------|-----------|----------------------------------|------|--------|-------------------------------------|-------------------------------------------------------------------------------------------------------------------------------------------------------------------------------------------------------------------------------------------------------------------------------------------------------------------------------------------------------------------------------------------------------------------------------------------------------------------------------------------------------------------------------------------------------------------------------------------------------------------------------------------------------------|-----------------------------------------------------------------------------------------------------------------------------------------------------------------------------------------------------------------------------------------------------------------------------------------------------------------------------------------------------------------------------------------------|------------------------------------------------------------------------------------------------------------------------------------------------------------------------------------------------------------------------------------------------------------------------------------------------------------------------------------------------------------------------------------------------------------------------------------------------------------------------------------------------------------------------|
| 207794_at | NM_000648 | CCR2 | Homo sapiens | 6-Oct-14 | Exemplar sequence | GenBank | gb:NM_000648.1 /DEF=Homo sapiens chemokine (C-C motif) receptor 2 (CCR2), mRNA. /FEA=mRNA /GEN=CCR2 /PROD=chemokine (C-C motif) receptor 2 /DB_XREF=gi:4757937 /UG=Hs.395 chemokine (C-C motif) receptor 2 /FL=gb:U03905.1 gb:NM_000648.1 gb:D29984.1 | NM_000648 | chemokine (C-C motif) receptor 2 | CCR2 | 729230 | NM_001123041<br>///<br>NM_001123396 | 0001974 // blood vessel remodeling // inferred from sequence or structural similarity /// 0002407 // dendritic cell chemotaxis // traceable author statement /// 0002827 // positive regulation of T-helper 1 type immune response // inferred from sequence or structural similarity /// 0002829 // negative regulation of type 2 immune response // inferred from sequence or structural similarity /// 0006874 // cellular calcium ion homeostasis // inferred from sequence or structural similarity /// 0006935 // chemotaxis // traceable author statement /// 0006954 // inflammatory response // inferred from electronic annotation /// 0006955 // | 0005737 // cytoplasm // inferred from direct assay /// 0005829 // cytosol // inferred from sequence or structural similarity /// 0005886 // plasma membrane // inferred from direct assay /// 0005886 // plasma membrane // traceable author statement /// 0005887 // integral component of plasma membrane // traceable author statement /// 0016020 // membrane // inferred from electronic | 0004871 // signal transducer activity // inferred from electronic annotation /// 0004930 // G-protein coupled receptor activity // inferred from electronic annotation /// 0004950 // chemokine receptor activity // traceable author statement /// 0016493 // C-C chemokine receptor activity // inferred from electronic annotation /// 0031727 // CCR2 chemokine receptor binding // inferred from direct assay /// 0042803 // protein homodimerization activity // inferred from sequence or structural similarity |
|-----------|-----------|------|--------------|----------|-------------------|---------|-------------------------------------------------------------------------------------------------------------------------------------------------------------------------------------------------------------------------------------------------------|-----------|----------------------------------|------|--------|-------------------------------------|-------------------------------------------------------------------------------------------------------------------------------------------------------------------------------------------------------------------------------------------------------------------------------------------------------------------------------------------------------------------------------------------------------------------------------------------------------------------------------------------------------------------------------------------------------------------------------------------------------------------------------------------------------------|-----------------------------------------------------------------------------------------------------------------------------------------------------------------------------------------------------------------------------------------------------------------------------------------------------------------------------------------------------------------------------------------------|------------------------------------------------------------------------------------------------------------------------------------------------------------------------------------------------------------------------------------------------------------------------------------------------------------------------------------------------------------------------------------------------------------------------------------------------------------------------------------------------------------------------|

|             |           |        |              |          |                   |         |                                                                                                                                                                                                                                                                                              |           |                                       |        |     |                                                                                                                                                                                                                                                                                                   |                                                                                                                                                                                                                                                                                                                                                                                                                                                                                                                                                                                                                                     |                                                                                                                                                                  |                                                                                                                                                                                                                                                                                                                                                                                                                                                                                                                                                                                                                                                                 |
|-------------|-----------|--------|--------------|----------|-------------------|---------|----------------------------------------------------------------------------------------------------------------------------------------------------------------------------------------------------------------------------------------------------------------------------------------------|-----------|---------------------------------------|--------|-----|---------------------------------------------------------------------------------------------------------------------------------------------------------------------------------------------------------------------------------------------------------------------------------------------------|-------------------------------------------------------------------------------------------------------------------------------------------------------------------------------------------------------------------------------------------------------------------------------------------------------------------------------------------------------------------------------------------------------------------------------------------------------------------------------------------------------------------------------------------------------------------------------------------------------------------------------------|------------------------------------------------------------------------------------------------------------------------------------------------------------------|-----------------------------------------------------------------------------------------------------------------------------------------------------------------------------------------------------------------------------------------------------------------------------------------------------------------------------------------------------------------------------------------------------------------------------------------------------------------------------------------------------------------------------------------------------------------------------------------------------------------------------------------------------------------|
| 207999_s_at | NM_001112 | ADARB1 | Homo sapiens | 6-Oct-14 | Exemplar sequence | GenBank | gb:NM_001112.1 /DEF=Homo sapiens adenosine deaminase, RNA-specific, B1 (homolog of rat RED1) (ADARB1), transcript variant DRADA2a, mRNA. /FEA=mRNA /GEN=ADARB1 /PROD=RNA-specific adenosine deaminase B1, isoformDRADA2a /DB_XREF=gi:4501918 /UG=Hs.85302 adenosine deaminase, RNA-specific, | NM_001112 | adenosine deaminase, RNA-specific, B1 | ADARB1 | 104 | NM_001033049<br>/// NM_001112<br>///<br>NM_001160230<br>/// NM_015833<br>/// NM_015834<br>/// NR_027672 ///<br>NR_027673 ///<br>NR_027674 ///<br>NR_073200 ///<br>XM_006723953<br>///<br>XM_006723954<br>///<br>XM_006723955<br>///<br>XM_006723956<br>///<br>XM_006723957<br>///<br>XM_006723958 | 0002376 // immune system process // inferred from electronic annotation /// 0006382 // adenosine to inosine editing // inferred from direct assay /// 0006382 // adenosine to inosine editing // traceable author statement /// 0006396 // RNA processing // inferred from direct assay /// 0006397 // mRNA processing // inferred from electronic annotation /// 0008285 // negative regulation of cell proliferation // inferred from direct assay /// 0010467 // gene expression // traceable author statement /// 0016553 // base conversion or substitution editing // inferred by curator /// 0016556 // mRNA modification // | 0005634 // nucleus // inferred from direct assay /// 0005654 // nucleoplasm // traceable author statement /// 0005730 // nucleolus // inferred from direct assay | 0003723 // RNA binding // inferred from direct assay /// 0003725 // double-stranded RNA binding // inferred from direct assay /// 0003726 // double-stranded RNA adenosine deaminase activity // inferred from direct assay /// 0003729 // mRNA binding // traceable author statement /// 0004000 // adenosine deaminase activity // inferred from electronic annotation /// 0005515 // protein binding // inferred from physical interaction /// 0016787 // hydrolase activity // inferred from electronic annotation /// 0044822 // poly(A) RNA binding // inferred from direct assay /// 0046872 // metal ion binding // inferred from electronic annotation |
|-------------|-----------|--------|--------------|----------|-------------------|---------|----------------------------------------------------------------------------------------------------------------------------------------------------------------------------------------------------------------------------------------------------------------------------------------------|-----------|---------------------------------------|--------|-----|---------------------------------------------------------------------------------------------------------------------------------------------------------------------------------------------------------------------------------------------------------------------------------------------------|-------------------------------------------------------------------------------------------------------------------------------------------------------------------------------------------------------------------------------------------------------------------------------------------------------------------------------------------------------------------------------------------------------------------------------------------------------------------------------------------------------------------------------------------------------------------------------------------------------------------------------------|------------------------------------------------------------------------------------------------------------------------------------------------------------------|-----------------------------------------------------------------------------------------------------------------------------------------------------------------------------------------------------------------------------------------------------------------------------------------------------------------------------------------------------------------------------------------------------------------------------------------------------------------------------------------------------------------------------------------------------------------------------------------------------------------------------------------------------------------|

|             |           |      |              |          |                   |         |                                                                                                                                                                                                                                                          |           |                                     |      |      |                                                                                                                         |                                                                                                                                                                                                                                                                                                                                                                                                                                                                                                                                                                                                                                                |                                                                                                                                                                                                                                                                                                                               |                                                                                                                                                                                                                                                                                                                                                                                                                                                                                                                                                                                                                                                                                                                                   |
|-------------|-----------|------|--------------|----------|-------------------|---------|----------------------------------------------------------------------------------------------------------------------------------------------------------------------------------------------------------------------------------------------------------|-----------|-------------------------------------|------|------|-------------------------------------------------------------------------------------------------------------------------|------------------------------------------------------------------------------------------------------------------------------------------------------------------------------------------------------------------------------------------------------------------------------------------------------------------------------------------------------------------------------------------------------------------------------------------------------------------------------------------------------------------------------------------------------------------------------------------------------------------------------------------------|-------------------------------------------------------------------------------------------------------------------------------------------------------------------------------------------------------------------------------------------------------------------------------------------------------------------------------|-----------------------------------------------------------------------------------------------------------------------------------------------------------------------------------------------------------------------------------------------------------------------------------------------------------------------------------------------------------------------------------------------------------------------------------------------------------------------------------------------------------------------------------------------------------------------------------------------------------------------------------------------------------------------------------------------------------------------------------|
| 208072_s_at | NM_003648 | DGKD | Homo sapiens | 6-Oct-14 | Exemplar sequence | GenBank | gb:NM_003648.1 /DEF=Homo sapiens diacylglycerol kinase, delta (130kD) (DGKD), mRNA. /FEA=mRNA /GEN=DGKD /PROD=diacylglycerol kinase, delta (130kD) /DB_XREF=gi:4503310 /UG=Hs.115907 diacylglycerol kinase, delta (130kD) /FL=gb:D73409.1 gb:NM_003648.1 | NM_003648 | diacylglycerol kinase, delta 130kDa | DGKD | 8527 | NM_003648 /// NM_152879 /// XM_005246107 /// XM_005246108 /// XM_005246109 /// XM_005246110 /// XR_427118 /// XR_427119 | 0006810 // transport // inferred from electronic annotation /// 0006897 // endocytosis // inferred from electronic annotation /// 0007165 // signal transduction // traceable author statement /// 0007173 // epidermal growth factor receptor signaling pathway // non-traceable author statement /// 0007205 // protein kinase C-activating G-protein coupled receptor signaling pathway // non-traceable author statement /// 0007275 // multicellular organismal development // non-traceable author statement /// 0007596 // blood coagulation // traceable author statement /// 0008152 // metabolic process // inferred from electronic | 0005737 // cytoplasm // inferred from direct assay /// 0005886 // plasma membrane // inferred from direct assay /// 0005886 // plasma membrane // traceable author statement /// 0016020 // membrane // inferred from electronic annotation /// 0016023 // cytoplasmic membrane-bounded vesicle // inferred from direct assay | 0000166 // nucleotide binding // inferred from electronic annotation /// 0003951 // NAD+ kinase activity // inferred from electronic annotation /// 0004143 // diacylglycerol kinase activity // inferred from direct assay /// 0004143 // diacylglycerol kinase activity // traceable author statement /// 0005515 // protein binding // inferred from physical interaction /// 0005524 // ATP binding // inferred from electronic annotation /// 0005543 // phospholipid binding // inferred from electronic annotation /// 0016301 // kinase activity // inferred from electronic annotation /// 0016740 // transferase activity // inferred from electronic annotation /// 0019992 // diacylglycerol binding // non-traceable |
|-------------|-----------|------|--------------|----------|-------------------|---------|----------------------------------------------------------------------------------------------------------------------------------------------------------------------------------------------------------------------------------------------------------|-----------|-------------------------------------|------|------|-------------------------------------------------------------------------------------------------------------------------|------------------------------------------------------------------------------------------------------------------------------------------------------------------------------------------------------------------------------------------------------------------------------------------------------------------------------------------------------------------------------------------------------------------------------------------------------------------------------------------------------------------------------------------------------------------------------------------------------------------------------------------------|-------------------------------------------------------------------------------------------------------------------------------------------------------------------------------------------------------------------------------------------------------------------------------------------------------------------------------|-----------------------------------------------------------------------------------------------------------------------------------------------------------------------------------------------------------------------------------------------------------------------------------------------------------------------------------------------------------------------------------------------------------------------------------------------------------------------------------------------------------------------------------------------------------------------------------------------------------------------------------------------------------------------------------------------------------------------------------|

|             |           |        |              |          |                   |         |                                                                                                                                                                                                                                        |           |                             |        |      |                                                                                                                                                                                                                                                                            |  |                                                                                                                                                                                                                                                                       |                                                                                                                                   |
|-------------|-----------|--------|--------------|----------|-------------------|---------|----------------------------------------------------------------------------------------------------------------------------------------------------------------------------------------------------------------------------------------|-----------|-----------------------------|--------|------|----------------------------------------------------------------------------------------------------------------------------------------------------------------------------------------------------------------------------------------------------------------------------|--|-----------------------------------------------------------------------------------------------------------------------------------------------------------------------------------------------------------------------------------------------------------------------|-----------------------------------------------------------------------------------------------------------------------------------|
| 208132_x_at | NM_004638 | PRRC2A | Homo sapiens | 6-Oct-14 | Exemplar sequence | GenBank | gb:NM_004638.1 /DEF=Homo sapiens HLA-B associated transcript-2 (D6S51E), mRNA. /FEA=mRNA /GEN=D6S51E /PROD=HLA-B associated transcript-2 /DB_XREF=gi:4758107 /UG=Hs.25911 HLA-B associated transcript-2 /FL=gb:M33509.1 gb:NM_004638.1 | NM_004638 | proline-rich coiled-coil 2A | PRRC2A | 7916 | NM_004638 ///<br>NM_080686 ///<br>XM_006715191 ///<br>XM_006725507 ///<br>XM_006725508 ///<br>XM_006725723 ///<br>XM_006725724 ///<br>XM_006725833 ///<br>XM_006725834 ///<br>XM_006725922 ///<br>XM_006726023 ///<br>XM_006726024 ///<br>XM_006726111 ///<br>XM_006726112 |  | 0005634 // nucleus // inferred from electronic annotation ///<br>0005737 // cytoplasm // inferred from electronic annotation ///<br>0016020 // membrane // inferred from direct assay ///<br>0070062 // extracellular vesicular exosome // inferred from direct assay | 0005515 // protein binding // inferred from physical interaction /// 0044822 // poly(A) RNA binding // inferred from direct assay |
|-------------|-----------|--------|--------------|----------|-------------------|---------|----------------------------------------------------------------------------------------------------------------------------------------------------------------------------------------------------------------------------------------|-----------|-----------------------------|--------|------|----------------------------------------------------------------------------------------------------------------------------------------------------------------------------------------------------------------------------------------------------------------------------|--|-----------------------------------------------------------------------------------------------------------------------------------------------------------------------------------------------------------------------------------------------------------------------|-----------------------------------------------------------------------------------------------------------------------------------|

|             |           |       |              |          |                   |         |                                                                                                                                                                                                                                                       |           |                                        |       |       |                                                           |                                                                                                                                                                                                                                                                                                                                                                                                                                                                                                                                                                                                                  |                                                                                                                                                                        |                                                                                                                                                                                                                                                                                                                                                                                                                                                                                                                                                                                                                                                                                                                            |
|-------------|-----------|-------|--------------|----------|-------------------|---------|-------------------------------------------------------------------------------------------------------------------------------------------------------------------------------------------------------------------------------------------------------|-----------|----------------------------------------|-------|-------|-----------------------------------------------------------|------------------------------------------------------------------------------------------------------------------------------------------------------------------------------------------------------------------------------------------------------------------------------------------------------------------------------------------------------------------------------------------------------------------------------------------------------------------------------------------------------------------------------------------------------------------------------------------------------------------|------------------------------------------------------------------------------------------------------------------------------------------------------------------------|----------------------------------------------------------------------------------------------------------------------------------------------------------------------------------------------------------------------------------------------------------------------------------------------------------------------------------------------------------------------------------------------------------------------------------------------------------------------------------------------------------------------------------------------------------------------------------------------------------------------------------------------------------------------------------------------------------------------------|
| 208151_x_at | NM_030881 | DDX17 | Homo sapiens | 6-Oct-14 | Exemplar sequence | GenBank | gb:NM_030881.1 /DEF=Homo sapiens DEADH (Asp-Glu-Ala-AspHis) box polypeptide 17 (72kD) (DDX17), transcript variant 2, mRNA. /FEA=mRNA /GEN=DDX17 /PROD=DEADH (Asp-Glu-Ala-AspHis) box polypeptide 17,isoform 2 /DB_XREF=gi:13787203 /FL=gb:NM_030881.1 | NM_030881 | DEAD (Asp-Glu-Ala-Asp) box helicase 17 | DDX17 | 10521 | NM_001098504 /// NM_001098505 /// NM_006386 /// NM_030881 | 0006200 // ATP catabolic process // inferred from electronic annotation /// 0006200 // ATP catabolic process // traceable author statement /// 0006351 // transcription, DNA-templated // inferred from electronic annotation /// 0006355 // regulation of transcription, DNA-templated // inferred from electronic annotation /// 0006396 // RNA processing // traceable author statement /// 0008152 // metabolic process // inferred from electronic annotation /// 0009791 // post-embryonic development // inferred from electronic annotation /// 0033148 // positive regulation of intracellular estrogen | 0005634 // nucleus // inferred from direct assay /// 0005730 // nucleolus // inferred from electronic annotation /// 0016020 // membrane // inferred from direct assay | 0000166 // nucleotide binding // inferred from electronic annotation /// 0003676 // nucleic acid binding // inferred from electronic annotation /// 0003713 // transcription coactivator activity // inferred from direct assay /// 0003723 // RNA binding // traceable author statement /// 0003724 // RNA helicase activity // traceable author statement /// 0004386 // helicase activity // inferred from electronic annotation /// 0005515 // protein binding // inferred from physical interaction /// 0005524 // ATP binding // inferred from electronic annotation /// 0008026 // ATP-dependent helicase activity // inferred from electronic annotation /// 0008186 // RNA-dependent ATPase activity // traceable |
|-------------|-----------|-------|--------------|----------|-------------------|---------|-------------------------------------------------------------------------------------------------------------------------------------------------------------------------------------------------------------------------------------------------------|-----------|----------------------------------------|-------|-------|-----------------------------------------------------------|------------------------------------------------------------------------------------------------------------------------------------------------------------------------------------------------------------------------------------------------------------------------------------------------------------------------------------------------------------------------------------------------------------------------------------------------------------------------------------------------------------------------------------------------------------------------------------------------------------------|------------------------------------------------------------------------------------------------------------------------------------------------------------------------|----------------------------------------------------------------------------------------------------------------------------------------------------------------------------------------------------------------------------------------------------------------------------------------------------------------------------------------------------------------------------------------------------------------------------------------------------------------------------------------------------------------------------------------------------------------------------------------------------------------------------------------------------------------------------------------------------------------------------|



|             |           |      |              |          |                   |         |                                                                                                                                                                                                                                                                                    |           |                                     |      |      |                                                                                                                                                                                                                                                                                                 |                                                                                                                                                                                                                                                                                                                                                                                                                                                                                                                                                                                                                                                               |                                                                                                                                                                                                                                                                                                                                                                                                                                   |                                                                                                                                                                                                                                                                                                                                                                                                                                                                                                                               |
|-------------|-----------|------|--------------|----------|-------------------|---------|------------------------------------------------------------------------------------------------------------------------------------------------------------------------------------------------------------------------------------------------------------------------------------|-----------|-------------------------------------|------|------|-------------------------------------------------------------------------------------------------------------------------------------------------------------------------------------------------------------------------------------------------------------------------------------------------|---------------------------------------------------------------------------------------------------------------------------------------------------------------------------------------------------------------------------------------------------------------------------------------------------------------------------------------------------------------------------------------------------------------------------------------------------------------------------------------------------------------------------------------------------------------------------------------------------------------------------------------------------------------|-----------------------------------------------------------------------------------------------------------------------------------------------------------------------------------------------------------------------------------------------------------------------------------------------------------------------------------------------------------------------------------------------------------------------------------|-------------------------------------------------------------------------------------------------------------------------------------------------------------------------------------------------------------------------------------------------------------------------------------------------------------------------------------------------------------------------------------------------------------------------------------------------------------------------------------------------------------------------------|
| 208240_s_at | NM_013394 | FGF1 | Homo sapiens | 6-Oct-14 | Exemplar sequence | GenBank | gb:NM_013394.1 /DEF=Homo sapiens acid fibroblast growth factor-like protein (GLIO703), mRNA. /FEA=mRNA /GEN=GLIO703 /PROD=acid fibroblast growth factor-like protein /DB_XREF=gj:7019394 /UG=Hs.278954 acid fibroblast growth factor-like protein /FL=gb:AF211169.1 gb:NM_013394.1 | NM_013394 | fibroblast growth factor 1 (acidic) | FGF1 | 2246 | NM_000800 ///<br>NM_001144892 ///<br>NM_001144934 ///<br>NM_001144935 ///<br>NM_001257205 ///<br>NM_001257206 ///<br>NM_001257207 ///<br>NM_001257208 ///<br>NM_001257209 ///<br>NM_001257210 ///<br>NM_001257211 ///<br>NM_001257212 ///<br>NM_033136 ///<br>NM_033137 ///<br>XM_005268390 /// | 0001525 // angiogenesis // inferred from electronic annotation /// 0001759 // organ induction // inferred from electronic annotation /// 0001934 // positive regulation of protein phosphorylation // inferred from electronic annotation /// 0007165 // signal transduction // non-traceable author statement /// 0007173 // epidermal growth factor receptor signaling pathway // traceable author statement /// 0007275 // multicellular organismal development // traceable author statement /// 0008284 // positive regulation of cell proliferation // inferred from genetic interaction /// 0008286 // insulin receptor signaling pathway // traceable | 0005576 // extracellular region // inferred from direct assay /// 0005576 // extracellular region // traceable author statement /// 0005578 // proteinaceous extracellular matrix // inferred from electronic annotation /// 0005615 // extracellular space // inferred from direct assay /// 0005634 // nucleus // inferred from direct assay /// 0005730 // nucleolus // inferred from direct assay /// 0005737 // cytoplasm // | 0005102 // receptor binding // inferred from electronic annotation /// 0005104 // fibroblast growth factor receptor binding // inferred from physical interaction /// 0005515 // protein binding // inferred from physical interaction /// 0008083 // growth factor activity // inferred from direct assay /// 0008201 // heparin binding // inferred from direct assay /// 0030544 // Hsp70 protein binding // inferred from electronic annotation /// 0044548 // S100 protein binding // inferred from physical interaction |
|-------------|-----------|------|--------------|----------|-------------------|---------|------------------------------------------------------------------------------------------------------------------------------------------------------------------------------------------------------------------------------------------------------------------------------------|-----------|-------------------------------------|------|------|-------------------------------------------------------------------------------------------------------------------------------------------------------------------------------------------------------------------------------------------------------------------------------------------------|---------------------------------------------------------------------------------------------------------------------------------------------------------------------------------------------------------------------------------------------------------------------------------------------------------------------------------------------------------------------------------------------------------------------------------------------------------------------------------------------------------------------------------------------------------------------------------------------------------------------------------------------------------------|-----------------------------------------------------------------------------------------------------------------------------------------------------------------------------------------------------------------------------------------------------------------------------------------------------------------------------------------------------------------------------------------------------------------------------------|-------------------------------------------------------------------------------------------------------------------------------------------------------------------------------------------------------------------------------------------------------------------------------------------------------------------------------------------------------------------------------------------------------------------------------------------------------------------------------------------------------------------------------|

|             |           |      |              |          |                   |         |                                                                                                                                                                                        |           |                    |      |      |           |                                                                                                                                                                                                                                                                                                                                                                                                                            |                                                                                                                                                                                                           |                                                                                                                                               |
|-------------|-----------|------|--------------|----------|-------------------|---------|----------------------------------------------------------------------------------------------------------------------------------------------------------------------------------------|-----------|--------------------|------|------|-----------|----------------------------------------------------------------------------------------------------------------------------------------------------------------------------------------------------------------------------------------------------------------------------------------------------------------------------------------------------------------------------------------------------------------------------|-----------------------------------------------------------------------------------------------------------------------------------------------------------------------------------------------------------|-----------------------------------------------------------------------------------------------------------------------------------------------|
| 208581_x_at | NM_005952 | MT1X | Homo sapiens | 6-Oct-14 | Exemplar sequence | GenBank | gb:NM_005952.1 /DEF=Homo sapiens metallothionein 1X (MT1X), mRNA. /FEA=CDS /GEN=MT1X /PROD=metallothionein 1X /DB_XREF=gi:10835231 /UG=Hs.278462 metallothionein 1X /FL=gb:NM_005952.1 | NM_005952 | metallothionein 1X | MT1X | 4501 | NM_005952 | 0010038 // response to metal ion // traceable author statement /// 0036018 // cellular response to erythropoietin // inferred from expression pattern /// 0045926 // negative regulation of growth // inferred from sequence or structural similarity /// 0071276 // cellular response to cadmium ion // inferred from expression pattern /// 0071294 // cellular response to zinc ion // inferred from expression pattern | 0005634 // nucleus // inferred from direct assay /// 0005737 // cytoplasm // inferred from direct assay /// 0048471 // perinuclear region of cytoplasm // inferred from sequence or structural similarity | 0008270 // zinc ion binding // inferred from sequence or structural similarity /// 0046872 // metal ion binding // traceable author statement |
|-------------|-----------|------|--------------|----------|-------------------|---------|----------------------------------------------------------------------------------------------------------------------------------------------------------------------------------------|-----------|--------------------|------|------|-----------|----------------------------------------------------------------------------------------------------------------------------------------------------------------------------------------------------------------------------------------------------------------------------------------------------------------------------------------------------------------------------------------------------------------------------|-----------------------------------------------------------------------------------------------------------------------------------------------------------------------------------------------------------|-----------------------------------------------------------------------------------------------------------------------------------------------|

|             |          |      |              |          |                    |         |                                                                                                                                                                                                                                                              |          |               |      |       |                                                                                                                                               |                                                                                                                                                                                                                                                                                                                                                                                                                                                                                                                                                                                                                                                                                              |                                                                                                                                                                                                                                                                                                                                               |                                                                                                                                                                                                                                                                                                                           |
|-------------|----------|------|--------------|----------|--------------------|---------|--------------------------------------------------------------------------------------------------------------------------------------------------------------------------------------------------------------------------------------------------------------|----------|---------------|------|-------|-----------------------------------------------------------------------------------------------------------------------------------------------|----------------------------------------------------------------------------------------------------------------------------------------------------------------------------------------------------------------------------------------------------------------------------------------------------------------------------------------------------------------------------------------------------------------------------------------------------------------------------------------------------------------------------------------------------------------------------------------------------------------------------------------------------------------------------------------------|-----------------------------------------------------------------------------------------------------------------------------------------------------------------------------------------------------------------------------------------------------------------------------------------------------------------------------------------------|---------------------------------------------------------------------------------------------------------------------------------------------------------------------------------------------------------------------------------------------------------------------------------------------------------------------------|
| 208650_s_at | BG327863 | CD24 | Homo sapiens | 6-Oct-14 | Consensus sequence | GenBank | Consensus includes<br>gb:BG327863<br>/FEA=EST<br>/DB_XREF=gi:13134301<br>/DB_XREF=est:602426876F1<br>/CLONE=IMAGE:4564675<br>/UG=Hs.286124<br>CD24 antigen (small cell lung carcinoma cluster 4 antigen)<br>/FL=gb:M58664.1<br>gb:L33930.1<br>gb:NM_013230.1 | BG327863 | CD24 molecule | CD24 | 1E+08 | NM_001291737<br>///<br>NM_001291738<br>///<br>NM_001291739<br>///<br>NM_013230<br>///<br>NR_117089<br>///<br>NR_117090<br>///<br>XM_005278329 | 0001666 // response to hypoxia // inferred from expression pattern ///<br>0001775 // cell activation // inferred from direct assay ///<br>0001959 // regulation of cytokine-mediated signaling pathway // inferred from sequence or structural similarity ///<br>0002237 // response to molecule of bacterial origin // inferred from sequence or structural similarity ///<br>0002768 // immune response-regulating cell surface receptor signaling pathway // inferred by curator ///<br>0007155 // cell adhesion // inferred from electronic annotation ///<br>0007204 // positive regulation of cytosolic calcium ion concentration // inferred from direct assay ///<br>0007411 // axon | 0005886 // plasma membrane // inferred from electronic annotation ///<br>0009986 // cell surface // inferred from direct assay ///<br>0016020 // membrane // inferred from direct assay ///<br>0031225 // anchored component of membrane // inferred from electronic annotation ///<br>0045121 // membrane raft // inferred from direct assay | 0004871 // signal transducer activity // non-traceable author statement ///<br>0005515 // protein binding // inferred from physical interaction ///<br>0019901 // protein kinase binding // inferred from physical interaction ///<br>0030296 // protein tyrosine kinase activator activity // inferred from direct assay |
|-------------|----------|------|--------------|----------|--------------------|---------|--------------------------------------------------------------------------------------------------------------------------------------------------------------------------------------------------------------------------------------------------------------|----------|---------------|------|-------|-----------------------------------------------------------------------------------------------------------------------------------------------|----------------------------------------------------------------------------------------------------------------------------------------------------------------------------------------------------------------------------------------------------------------------------------------------------------------------------------------------------------------------------------------------------------------------------------------------------------------------------------------------------------------------------------------------------------------------------------------------------------------------------------------------------------------------------------------------|-----------------------------------------------------------------------------------------------------------------------------------------------------------------------------------------------------------------------------------------------------------------------------------------------------------------------------------------------|---------------------------------------------------------------------------------------------------------------------------------------------------------------------------------------------------------------------------------------------------------------------------------------------------------------------------|

|             |        |      |              |          |                   |         |                                                                                                                                                                                                                                                        |        |               |      |       |                                                                                                                             |                                                                                                                                                                                                                                                                                                                                                                                                                                                                                                                                                                                                                                                                                              |                                                                                                                                                                                                                                                                                                                                               |                                                                                                                                                                                                                                                                                                                           |
|-------------|--------|------|--------------|----------|-------------------|---------|--------------------------------------------------------------------------------------------------------------------------------------------------------------------------------------------------------------------------------------------------------|--------|---------------|------|-------|-----------------------------------------------------------------------------------------------------------------------------|----------------------------------------------------------------------------------------------------------------------------------------------------------------------------------------------------------------------------------------------------------------------------------------------------------------------------------------------------------------------------------------------------------------------------------------------------------------------------------------------------------------------------------------------------------------------------------------------------------------------------------------------------------------------------------------------|-----------------------------------------------------------------------------------------------------------------------------------------------------------------------------------------------------------------------------------------------------------------------------------------------------------------------------------------------|---------------------------------------------------------------------------------------------------------------------------------------------------------------------------------------------------------------------------------------------------------------------------------------------------------------------------|
| 208651_x_at | M58664 | CD24 | Homo sapiens | 6-Oct-14 | Exemplar sequence | GenBank | gb:M58664.1 /DEF=Homo sapiens CD24 signal transducer mRNA, complete cds. /FEA=mRNA /PROD=signal transducer CD24 /DB_XREF=gi:180167 /UG=Hs.286124 CD24 antigen (small cell lung carcinoma cluster 4 antigen) /FL=gb:M58664.1 gb:L33930.1 gb:NM_013230.1 | M58664 | CD24 molecule | CD24 | 1E+08 | NM_001291737 ///<br>NM_001291738 ///<br>NM_001291739 ///<br>NM_013230 ///<br>NR_117089 ///<br>NR_117090 ///<br>XM_005278329 | 0001666 // response to hypoxia // inferred from expression pattern ///<br>0001775 // cell activation // inferred from direct assay ///<br>0001959 // regulation of cytokine-mediated signaling pathway // inferred from sequence or structural similarity ///<br>0002237 // response to molecule of bacterial origin // inferred from sequence or structural similarity ///<br>0002768 // immune response-regulating cell surface receptor signaling pathway // inferred by curator ///<br>0007155 // cell adhesion // inferred from electronic annotation ///<br>0007204 // positive regulation of cytosolic calcium ion concentration // inferred from direct assay ///<br>0007411 // axon | 0005886 // plasma membrane // inferred from electronic annotation ///<br>0009986 // cell surface // inferred from direct assay ///<br>0016020 // membrane // inferred from direct assay ///<br>0031225 // anchored component of membrane // inferred from electronic annotation ///<br>0045121 // membrane raft // inferred from direct assay | 0004871 // signal transducer activity // non-traceable author statement ///<br>0005515 // protein binding // inferred from physical interaction ///<br>0019901 // protein kinase binding // inferred from physical interaction ///<br>0030296 // protein tyrosine kinase activator activity // inferred from direct assay |
|-------------|--------|------|--------------|----------|-------------------|---------|--------------------------------------------------------------------------------------------------------------------------------------------------------------------------------------------------------------------------------------------------------|--------|---------------|------|-------|-----------------------------------------------------------------------------------------------------------------------------|----------------------------------------------------------------------------------------------------------------------------------------------------------------------------------------------------------------------------------------------------------------------------------------------------------------------------------------------------------------------------------------------------------------------------------------------------------------------------------------------------------------------------------------------------------------------------------------------------------------------------------------------------------------------------------------------|-----------------------------------------------------------------------------------------------------------------------------------------------------------------------------------------------------------------------------------------------------------------------------------------------------------------------------------------------|---------------------------------------------------------------------------------------------------------------------------------------------------------------------------------------------------------------------------------------------------------------------------------------------------------------------------|

|           |        |       |              |          |                    |         |                                                                                                                                                                                                                                                                                                                              |        |                                        |       |       |                                                           |                                                                                                                                                                                                                                                                                                                                                                                                                                                                                                                                                                                                                  |                                                                                                                                                                        |                                                                                                                                                                                                                                                                                                                                                                                                                                                                                                                                                                                                                                                                                                                            |
|-----------|--------|-------|--------------|----------|--------------------|---------|------------------------------------------------------------------------------------------------------------------------------------------------------------------------------------------------------------------------------------------------------------------------------------------------------------------------------|--------|----------------------------------------|-------|-------|-----------------------------------------------------------|------------------------------------------------------------------------------------------------------------------------------------------------------------------------------------------------------------------------------------------------------------------------------------------------------------------------------------------------------------------------------------------------------------------------------------------------------------------------------------------------------------------------------------------------------------------------------------------------------------------|------------------------------------------------------------------------------------------------------------------------------------------------------------------------|----------------------------------------------------------------------------------------------------------------------------------------------------------------------------------------------------------------------------------------------------------------------------------------------------------------------------------------------------------------------------------------------------------------------------------------------------------------------------------------------------------------------------------------------------------------------------------------------------------------------------------------------------------------------------------------------------------------------------|
| 208718_at | Z97056 | DDX17 | Homo sapiens | 6-Oct-14 | Consensus sequence | GenBank | Consensus includes gb:Z97056 /DEF=Human DNA sequence from clone RP3-434P1 on chromosome 22 Contains the KCNJ4 gene for inwardly rectifying potassium channel J4 (hippocampal inward rectifier, HIR, HRK1, HIRK2, KIR2.3), the KDELR3 gene for KDEL (Lys-Asp-Glu-Leu) endoplasmic reticulu... /FEA=mRNA_5 /DB_XREF=gi:2832593 | Z97056 | DEAD (Asp-Glu-Ala-Asp) box helicase 17 | DDX17 | 10521 | NM_001098504 /// NM_001098505 /// NM_006386 /// NM_030881 | 0006200 // ATP catabolic process // inferred from electronic annotation /// 0006200 // ATP catabolic process // traceable author statement /// 0006351 // transcription, DNA-templated // inferred from electronic annotation /// 0006355 // regulation of transcription, DNA-templated // inferred from electronic annotation /// 0006396 // RNA processing // traceable author statement /// 0008152 // metabolic process // inferred from electronic annotation /// 0009791 // post-embryonic development // inferred from electronic annotation /// 0033148 // positive regulation of intracellular estrogen | 0005634 // nucleus // inferred from direct assay /// 0005730 // nucleolus // inferred from electronic annotation /// 0016020 // membrane // inferred from direct assay | 0000166 // nucleotide binding // inferred from electronic annotation /// 0003676 // nucleic acid binding // inferred from electronic annotation /// 0003713 // transcription coactivator activity // inferred from direct assay /// 0003723 // RNA binding // traceable author statement /// 0003724 // RNA helicase activity // traceable author statement /// 0004386 // helicase activity // inferred from electronic annotation /// 0005515 // protein binding // inferred from physical interaction /// 0005524 // ATP binding // inferred from electronic annotation /// 0008026 // ATP-dependent helicase activity // inferred from electronic annotation /// 0008186 // RNA-dependent ATPase activity // traceable |
|-----------|--------|-------|--------------|----------|--------------------|---------|------------------------------------------------------------------------------------------------------------------------------------------------------------------------------------------------------------------------------------------------------------------------------------------------------------------------------|--------|----------------------------------------|-------|-------|-----------------------------------------------------------|------------------------------------------------------------------------------------------------------------------------------------------------------------------------------------------------------------------------------------------------------------------------------------------------------------------------------------------------------------------------------------------------------------------------------------------------------------------------------------------------------------------------------------------------------------------------------------------------------------------|------------------------------------------------------------------------------------------------------------------------------------------------------------------------|----------------------------------------------------------------------------------------------------------------------------------------------------------------------------------------------------------------------------------------------------------------------------------------------------------------------------------------------------------------------------------------------------------------------------------------------------------------------------------------------------------------------------------------------------------------------------------------------------------------------------------------------------------------------------------------------------------------------------|

|             |          |         |              |          |                    |         |                                                                                                                                                                                                                                                       |          |                                        |         |       |                                                           |                                                                                                                                                                                                                                                                                                                                                                                                                                                                                                                                                                                                                  |                                                                                                                                                                                                                |                                                                                                                                                                                                                                                                                                                                                                                                                                                                                                                                                                                                                                                                                                                            |
|-------------|----------|---------|--------------|----------|--------------------|---------|-------------------------------------------------------------------------------------------------------------------------------------------------------------------------------------------------------------------------------------------------------|----------|----------------------------------------|---------|-------|-----------------------------------------------------------|------------------------------------------------------------------------------------------------------------------------------------------------------------------------------------------------------------------------------------------------------------------------------------------------------------------------------------------------------------------------------------------------------------------------------------------------------------------------------------------------------------------------------------------------------------------------------------------------------------------|----------------------------------------------------------------------------------------------------------------------------------------------------------------------------------------------------------------|----------------------------------------------------------------------------------------------------------------------------------------------------------------------------------------------------------------------------------------------------------------------------------------------------------------------------------------------------------------------------------------------------------------------------------------------------------------------------------------------------------------------------------------------------------------------------------------------------------------------------------------------------------------------------------------------------------------------------|
| 208719_s_at | U59321   | DDX17   | Homo sapiens | 6-Oct-14 | Exemplar sequence  | GenBank | gb:U59321.1 /DEF=Human DEAD-box protein p72 (P72) mRNA, complete cds. /FEA=mRNA /GEN=P72 /PROD=DEAD-box protein p72 /DB_XREF=gi:1592564 /UG=Hs.6179 DEADH (Asp-Glu-Ala-AspHis) box polypeptide 17 (72kD) /FL=gb:BC000595.1 gb:NM_006386.2 gb:U59321.1 | U59321   | DEAD (Asp-Glu-Ala-Asp) box helicase 17 | DDX17   | 10521 | NM_001098504 /// NM_001098505 /// NM_006386 /// NM_030881 | 0006200 // ATP catabolic process // inferred from electronic annotation /// 0006200 // ATP catabolic process // traceable author statement /// 0006351 // transcription, DNA-templated // inferred from electronic annotation /// 0006355 // regulation of transcription, DNA-templated // inferred from electronic annotation /// 0006396 // RNA processing // traceable author statement /// 0008152 // metabolic process // inferred from electronic annotation /// 0009791 // post-embryonic development // inferred from electronic annotation /// 0033148 // positive regulation of intracellular estrogen | 0005634 // nucleus // inferred from direct assay /// 0005730 // nucleolus // inferred from electronic annotation /// 0016020 // membrane // inferred from direct assay                                         | 0000166 // nucleotide binding // inferred from electronic annotation /// 0003676 // nucleic acid binding // inferred from electronic annotation /// 0003713 // transcription coactivator activity // inferred from direct assay /// 0003723 // RNA binding // traceable author statement /// 0003724 // RNA helicase activity // traceable author statement /// 0004386 // helicase activity // inferred from electronic annotation /// 0005515 // protein binding // inferred from physical interaction /// 0005524 // ATP binding // inferred from electronic annotation /// 0008026 // ATP-dependent helicase activity // inferred from electronic annotation /// 0008186 // RNA-dependent ATPase activity // traceable |
| 208797_s_at | AI829170 | GOLGA8A | Homo sapiens | 6-Oct-14 | Consensus sequence | GenBank | Consensus includes gb:AI829170 /FEA=EST /DB_XREF=gi:5449841 /DB_XREF=est:wk76b03.x1 /CLONE=IMAGE:2421293 /UG=Hs.182982 golgin-67 /FL=gb:NM_015003.1 gb:AF204231.1                                                                                     | AI829170 | golgin A8 family, member A             | GOLGA8A | 23015 | NM_181077 /// NR_027409 /// XM_006720440                  |                                                                                                                                                                                                                                                                                                                                                                                                                                                                                                                                                                                                                  | 0005794 // Golgi apparatus // inferred from electronic annotation /// 0016020 // membrane // inferred from electronic annotation /// 0032580 // Golgi cisterna membrane // inferred from electronic annotation |                                                                                                                                                                                                                                                                                                                                                                                                                                                                                                                                                                                                                                                                                                                            |

|                 |          |         |                 |          |                      |         |                                                                                                                                                                                                                                                               |          |                                  |             |       |                                                |  |                                                                                                                                                                                                                                                             |  |
|-----------------|----------|---------|-----------------|----------|----------------------|---------|---------------------------------------------------------------------------------------------------------------------------------------------------------------------------------------------------------------------------------------------------------------|----------|----------------------------------|-------------|-------|------------------------------------------------|--|-------------------------------------------------------------------------------------------------------------------------------------------------------------------------------------------------------------------------------------------------------------|--|
| 208798_x<br>_at | AF204231 | GOLGA8A | Homo<br>sapiens | 6-Oct-14 | Exemplar<br>sequence | GenBank | gb:AF204231.1<br>/DEF=Homo<br>sapiens 88-kDa<br>Golgi protein<br>(GM88) mRNA,<br>complete cds.<br>/FEA=mRNA<br>/GEN=GM88<br>/PROD=88-kDa<br>Golgi protein<br>/DB_XREF=gi:6<br>808610<br>/UG=Hs.182982<br>golgin-67<br>/FL=gb:NM_01<br>5003.1<br>gb:AF204231.1 | AF204231 | golgin A8<br>family,<br>member A | GOLGA8<br>A | 23015 | NM_181077 ///<br>NR_027409 ///<br>XM_006720440 |  | 0005794 // Golgi<br>apparatus //<br>inferred from<br>electronic<br>annotation ///<br>0016020 //<br>membrane //<br>inferred from<br>electronic<br>annotation ///<br>0032580 // Golgi<br>cisterna<br>membrane //<br>inferred from<br>electronic<br>annotation |  |
|-----------------|----------|---------|-----------------|----------|----------------------|---------|---------------------------------------------------------------------------------------------------------------------------------------------------------------------------------------------------------------------------------------------------------------|----------|----------------------------------|-------------|-------|------------------------------------------------|--|-------------------------------------------------------------------------------------------------------------------------------------------------------------------------------------------------------------------------------------------------------------|--|

|           |          |     |              |          |                   |         |                                                                                                                                                                                                                                                                                                                             |          |                                                |     |      |           |                                                                                                                                                                                                                                                                                                                                                                                                                                                                                                                                                                                                      |                                                                                                                                                                                                                                                                                                                                                                                      |                                                                                                                                                                                                                                                                                                                                                                                                                                                                                                                                                                                                                                                                   |
|-----------|----------|-----|--------------|----------|-------------------|---------|-----------------------------------------------------------------------------------------------------------------------------------------------------------------------------------------------------------------------------------------------------------------------------------------------------------------------------|----------|------------------------------------------------|-----|------|-----------|------------------------------------------------------------------------------------------------------------------------------------------------------------------------------------------------------------------------------------------------------------------------------------------------------------------------------------------------------------------------------------------------------------------------------------------------------------------------------------------------------------------------------------------------------------------------------------------------------|--------------------------------------------------------------------------------------------------------------------------------------------------------------------------------------------------------------------------------------------------------------------------------------------------------------------------------------------------------------------------------------|-------------------------------------------------------------------------------------------------------------------------------------------------------------------------------------------------------------------------------------------------------------------------------------------------------------------------------------------------------------------------------------------------------------------------------------------------------------------------------------------------------------------------------------------------------------------------------------------------------------------------------------------------------------------|
| 209189_at | BC004490 | FOS | Homo sapiens | 6-Oct-14 | Exemplar sequence | GenBank | gb:BC004490.1<br>/DEF=Homo sapiens, v-fos FBJ murine osteosarcoma viral oncogene homolog, clone MGC:11074, mRNA, complete cds.<br>/FEA=mRNA<br>/PROD=v-fos FBJ murine osteosarcoma viral oncogene homolog<br>/DB_XREF=gi:13325363<br>/UG=Hs.25647 v-fos FBJ murine osteosarcoma viral oncogene homolog<br>/FL=gb:BC004490.1 | BC004490 | FBJ murine osteosarcoma viral oncogene homolog | FOS | 2353 | NM_005252 | 0001661 // conditioned taste aversion // inferred from electronic annotation /// 0002224 // toll-like receptor signaling pathway // traceable author statement /// 0002755 // MyD88-dependent toll-like receptor signaling pathway // traceable author statement /// 0002756 // MyD88-independent toll-like receptor signaling pathway // traceable author statement /// 0006306 // DNA methylation // traceable author statement /// 0006355 // regulation of transcription, DNA-templated // inferred from electronic annotation /// 0006357 // regulation of transcription from RNA polymerase II | 0005634 // nucleus // inferred from direct assay /// 0005654 // nucleoplasm // traceable author statement /// 0005667 // transcription factor complex // inferred from electronic annotation /// 0005730 // nucleolus // inferred from direct assay /// 0005737 // cytoplasm // inferred from electronic annotation /// 0005783 // endoplasmic reticulum // inferred from electronic | 0003677 // DNA binding // inferred from electronic annotation /// 0003690 // double-stranded DNA binding // inferred from electronic annotation /// 0003700 // sequence-specific DNA binding transcription factor activity // inferred from direct assay /// 0005515 // protein binding // inferred from physical interaction /// 0008134 // transcription factor binding // inferred from electronic annotation /// 0043565 // sequence-specific DNA binding // inferred from electronic annotation /// 0044212 // transcription regulatory region DNA binding // inferred from direct assay /// 0070412 // R-SMAD binding // inferred from physical interaction |
|-----------|----------|-----|--------------|----------|-------------------|---------|-----------------------------------------------------------------------------------------------------------------------------------------------------------------------------------------------------------------------------------------------------------------------------------------------------------------------------|----------|------------------------------------------------|-----|------|-----------|------------------------------------------------------------------------------------------------------------------------------------------------------------------------------------------------------------------------------------------------------------------------------------------------------------------------------------------------------------------------------------------------------------------------------------------------------------------------------------------------------------------------------------------------------------------------------------------------------|--------------------------------------------------------------------------------------------------------------------------------------------------------------------------------------------------------------------------------------------------------------------------------------------------------------------------------------------------------------------------------------|-------------------------------------------------------------------------------------------------------------------------------------------------------------------------------------------------------------------------------------------------------------------------------------------------------------------------------------------------------------------------------------------------------------------------------------------------------------------------------------------------------------------------------------------------------------------------------------------------------------------------------------------------------------------|



|             |        |       |              |          |                   |         |                                                                                                                                                                                                                                                                                                           |        |                                    |       |      |                            |                                                                                                                                                                                                                                                                                                                                                                                                                                                                                                                                                                                                                                                    |                                                                                                                                                                                                                                                                                                                                                                                               |                                                                                                                                                                                                                                                                                                                                                                                                                                                                                                                                                                                                                                                                                                                                             |
|-------------|--------|-------|--------------|----------|-------------------|---------|-----------------------------------------------------------------------------------------------------------------------------------------------------------------------------------------------------------------------------------------------------------------------------------------------------------|--------|------------------------------------|-------|------|----------------------------|----------------------------------------------------------------------------------------------------------------------------------------------------------------------------------------------------------------------------------------------------------------------------------------------------------------------------------------------------------------------------------------------------------------------------------------------------------------------------------------------------------------------------------------------------------------------------------------------------------------------------------------------------|-----------------------------------------------------------------------------------------------------------------------------------------------------------------------------------------------------------------------------------------------------------------------------------------------------------------------------------------------------------------------------------------------|---------------------------------------------------------------------------------------------------------------------------------------------------------------------------------------------------------------------------------------------------------------------------------------------------------------------------------------------------------------------------------------------------------------------------------------------------------------------------------------------------------------------------------------------------------------------------------------------------------------------------------------------------------------------------------------------------------------------------------------------|
| 209201_x_at | L01639 | CXCR4 | Homo sapiens | 6-Oct-14 | Exemplar sequence | GenBank | gb:L01639.1 /DEF=Human (clone HSY3RR) neuropeptide Y receptor (NPYR) mRNA, complete cds. /FEA=mRNA /GEN=NPYR /PROD=neuropeptide Y receptor /DB_XREF=gi:189313 /UG=Hs.89414 chemokine (C-X-C motif), receptor 4 (fusin) /FL=gb:L01639.1 gb:AF025375.1 gb:M99293.1 gb:L06797.1 gb:NM_003467.1 gb:AF147204.1 | L01639 | chemokine (C-X-C motif) receptor 4 | CXCR4 | 7852 | NM_001008540 /// NM_003467 | 0000187 // activation of MAPK activity // traceable author statement /// 0001569 // patterning of blood vessels // inferred from electronic annotation /// 0001666 // response to hypoxia // inferred from expression pattern /// 0001667 // amoeboid cell migration // inferred from electronic annotation /// 0001764 // neuron migration // inferred from electronic annotation /// 0002407 // dendritic cell chemotaxis // traceable author statement /// 0006915 // apoptotic process // traceable author statement /// 0006935 // chemotaxis // inferred from electronic annotation /// 0006954 // inflammatory response // traceable author | 0005737 // cytoplasm // traceable author statement /// 0005764 // lysosome // inferred from direct assay /// 0005768 // endosome // inferred from electronic annotation /// 0005769 // early endosome // inferred from direct assay /// 0005770 // late endosome // inferred from direct assay /// 0005886 // plasma membrane // inferred from direct assay /// 0005886 // plasma membrane // | 0001618 // virus receptor activity // inferred from electronic annotation /// 0003779 // actin binding // inferred from direct assay /// 0004871 // signal transducer activity // inferred from electronic annotation /// 0004930 // G-protein coupled receptor activity // traceable author statement /// 0004950 // chemokine receptor activity // inferred from electronic annotation /// 0005515 // protein binding // inferred from physical interaction /// 0015026 // coreceptor activity // traceable author statement /// 0016494 // C-X-C chemokine receptor activity // non-traceable author statement /// 0019955 // cytokine binding // inferred from electronic annotation /// 0031625 // ubiquitin protein ligase binding // |
|-------------|--------|-------|--------------|----------|-------------------|---------|-----------------------------------------------------------------------------------------------------------------------------------------------------------------------------------------------------------------------------------------------------------------------------------------------------------|--------|------------------------------------|-------|------|----------------------------|----------------------------------------------------------------------------------------------------------------------------------------------------------------------------------------------------------------------------------------------------------------------------------------------------------------------------------------------------------------------------------------------------------------------------------------------------------------------------------------------------------------------------------------------------------------------------------------------------------------------------------------------------|-----------------------------------------------------------------------------------------------------------------------------------------------------------------------------------------------------------------------------------------------------------------------------------------------------------------------------------------------------------------------------------------------|---------------------------------------------------------------------------------------------------------------------------------------------------------------------------------------------------------------------------------------------------------------------------------------------------------------------------------------------------------------------------------------------------------------------------------------------------------------------------------------------------------------------------------------------------------------------------------------------------------------------------------------------------------------------------------------------------------------------------------------------|

|             |          |       |              |          |                    |         |                                                                                                                                                                                                                                       |          |                                     |       |      |           |                                                                                                                                                                                                                                                                                                                                                                                                                                                                                                                                                                        |                                                                                        |                                                                                                                                                                                                 |
|-------------|----------|-------|--------------|----------|--------------------|---------|---------------------------------------------------------------------------------------------------------------------------------------------------------------------------------------------------------------------------------------|----------|-------------------------------------|-------|------|-----------|------------------------------------------------------------------------------------------------------------------------------------------------------------------------------------------------------------------------------------------------------------------------------------------------------------------------------------------------------------------------------------------------------------------------------------------------------------------------------------------------------------------------------------------------------------------------|----------------------------------------------------------------------------------------|-------------------------------------------------------------------------------------------------------------------------------------------------------------------------------------------------|
| 209324_s_at | BF304996 | RGS16 | Homo sapiens | 6-Oct-14 | Consensus sequence | GenBank | Consensus includes<br>gb:BF304996<br>/FEA=EST<br>/DB_XREF=gi:1251810<br>/DB_XREF=est:601888511F1<br>/CLONE=IMAGE:4122242<br>/UG=Hs.183601<br>regulator of G-protein signalling 16<br>/FL=gb:U70426.1<br>gb:U94829.1<br>gb:NM_002928.1 | BF304996 | regulator of G-protein signaling 16 | RGS16 | 6004 | NM_002928 | 0007601 // visual perception // traceable author statement ///<br>0008277 // regulation of G-protein coupled receptor protein signaling pathway // traceable author statement ///<br>0009968 // negative regulation of signal transduction // inferred from electronic annotation ///<br>0038032 // termination of G-protein coupled receptor signaling pathway // inferred from electronic annotation ///<br>0043547 // positive regulation of GTPase activity // not recorded ///<br>0043547 // positive regulation of GTPase activity // traceable author statement | 0005737 // cytoplasm // not recorded ///<br>0005886 // plasma membrane // not recorded | 0005096 // GTPase activator activity // not recorded ///<br>0005515 // protein binding // inferred from physical interaction ///<br>0005516 // calmodulin binding // traceable author statement |
|-------------|----------|-------|--------------|----------|--------------------|---------|---------------------------------------------------------------------------------------------------------------------------------------------------------------------------------------------------------------------------------------|----------|-------------------------------------|-------|------|-----------|------------------------------------------------------------------------------------------------------------------------------------------------------------------------------------------------------------------------------------------------------------------------------------------------------------------------------------------------------------------------------------------------------------------------------------------------------------------------------------------------------------------------------------------------------------------------|----------------------------------------------------------------------------------------|-------------------------------------------------------------------------------------------------------------------------------------------------------------------------------------------------|

|             |        |       |              |          |                   |         |                                                                                                                                                                                                                                                                                                                         |        |                                     |       |      |           |                                                                                                                                                                                                                                                                                                                                                                                                                                                                                                                                                         |                                                                                     |                                                                                                                                                                                           |
|-------------|--------|-------|--------------|----------|-------------------|---------|-------------------------------------------------------------------------------------------------------------------------------------------------------------------------------------------------------------------------------------------------------------------------------------------------------------------------|--------|-------------------------------------|-------|------|-----------|---------------------------------------------------------------------------------------------------------------------------------------------------------------------------------------------------------------------------------------------------------------------------------------------------------------------------------------------------------------------------------------------------------------------------------------------------------------------------------------------------------------------------------------------------------|-------------------------------------------------------------------------------------|-------------------------------------------------------------------------------------------------------------------------------------------------------------------------------------------|
| 209325_s_at | U94829 | RGS16 | Homo sapiens | 6-Oct-14 | Exemplar sequence | GenBank | gb:U94829.1 /DEF=Human retinally abundant regulator of G-protein signaling hRGS-r (hRGS-r) mRNA, complete cds. /FEA=mRNA /GEN=hRGS-r /PROD=retinally abundant regulator of G-protein signaling hRGS-r /DB_XREF=gj:2605639 /UG=Hs.183601 regulator of G-protein signalling 16 /FL=gb:U70426.1 gb:U94829.1 gb:NM_002928.1 | U94829 | regulator of G-protein signaling 16 | RGS16 | 6004 | NM_002928 | 0007601 // visual perception // traceable author statement /// 0008277 // regulation of G-protein coupled receptor protein signaling pathway // traceable author statement /// 0009968 // negative regulation of signal transduction // inferred from electronic annotation /// 0038032 // termination of G-protein coupled receptor signaling pathway // inferred from electronic annotation /// 0043547 // positive regulation of GTPase activity // not recorded /// 0043547 // positive regulation of GTPase activity // traceable author statement | 0005737 // cytoplasm // not recorded /// 0005886 // plasma membrane // not recorded | 0005096 // GTPase activator activity // not recorded /// 0005515 // protein binding // inferred from physical interaction /// 0005516 // calmodulin binding // traceable author statement |
|-------------|--------|-------|--------------|----------|-------------------|---------|-------------------------------------------------------------------------------------------------------------------------------------------------------------------------------------------------------------------------------------------------------------------------------------------------------------------------|--------|-------------------------------------|-------|------|-----------|---------------------------------------------------------------------------------------------------------------------------------------------------------------------------------------------------------------------------------------------------------------------------------------------------------------------------------------------------------------------------------------------------------------------------------------------------------------------------------------------------------------------------------------------------------|-------------------------------------------------------------------------------------|-------------------------------------------------------------------------------------------------------------------------------------------------------------------------------------------|

|             |          |        |              |          |                    |         |                                                                                                                                                                                              |          |                                                              |                      |                    |                            |                                                                                                                                                                                                                                                                                                                                                                                                                                                                                                                                                                |                                                                                                                                                                                                                                                                                                                                                                                                                          |                                                                                                                                                                                                                                                                                                                                                                                            |
|-------------|----------|--------|--------------|----------|--------------------|---------|----------------------------------------------------------------------------------------------------------------------------------------------------------------------------------------------|----------|--------------------------------------------------------------|----------------------|--------------------|----------------------------|----------------------------------------------------------------------------------------------------------------------------------------------------------------------------------------------------------------------------------------------------------------------------------------------------------------------------------------------------------------------------------------------------------------------------------------------------------------------------------------------------------------------------------------------------------------|--------------------------------------------------------------------------------------------------------------------------------------------------------------------------------------------------------------------------------------------------------------------------------------------------------------------------------------------------------------------------------------------------------------------------|--------------------------------------------------------------------------------------------------------------------------------------------------------------------------------------------------------------------------------------------------------------------------------------------------------------------------------------------------------------------------------------------|
| 209372_x_at | BF971587 | TUBB2A | Homo sapiens | 6-Oct-14 | Consensus sequence | GenBank | Consensus includes<br>gb:BF971587<br>/FEA=EST<br>/DB_XREF=gi:12338802<br>/DB_XREF=est:602239834F1<br>/CLONE=IMAGE:4328385<br>/UG=Hs.179661<br>tubulin, beta polypeptide<br>/FL=gb:BC001352.1 | BF971587 | tubulin, beta 2A class IIa<br>/// tubulin, beta 2B class IIb | TUBB2A<br>/// TUBB2B | 7280 ///<br>347733 | NM_001069 ///<br>NM_178012 | 0001764 // neuron migration // inferred from mutant phenotype ///<br>0006184 // GTP catabolic process // inferred from electronic annotation ///<br>0006457 // protein folding // traceable author statement ///<br>0007017 // microtubule-based process // inferred from electronic annotation ///<br>0044267 // cellular protein metabolic process // traceable author statement ///<br>0051084 // 'de novo' posttranslational protein folding // traceable author statement ///<br>0051258 // protein polymerization // inferred from electronic annotation | 0005634 // nucleus // inferred from direct assay ///<br>0005737 // cytoplasm // inferred from electronic annotation ///<br>0005856 // cytoskeleton // inferred from electronic annotation ///<br>0005874 // microtubule // inferred from direct assay ///<br>0005886 // plasma membrane // inferred from direct assay ///<br>0015630 // microtubule cytoskeleton // inferred from direct assay ///<br>0043234 // protein | 0000166 // nucleotide binding // inferred from electronic annotation ///<br>0003924 // GTPase activity // inferred from electronic annotation ///<br>0005200 // structural constituent of cytoskeleton // inferred from electronic annotation ///<br>0005515 // protein binding // inferred from physical interaction ///<br>0005525 // GTP binding // inferred from electronic annotation |
|-------------|----------|--------|--------------|----------|--------------------|---------|----------------------------------------------------------------------------------------------------------------------------------------------------------------------------------------------|----------|--------------------------------------------------------------|----------------------|--------------------|----------------------------|----------------------------------------------------------------------------------------------------------------------------------------------------------------------------------------------------------------------------------------------------------------------------------------------------------------------------------------------------------------------------------------------------------------------------------------------------------------------------------------------------------------------------------------------------------------|--------------------------------------------------------------------------------------------------------------------------------------------------------------------------------------------------------------------------------------------------------------------------------------------------------------------------------------------------------------------------------------------------------------------------|--------------------------------------------------------------------------------------------------------------------------------------------------------------------------------------------------------------------------------------------------------------------------------------------------------------------------------------------------------------------------------------------|

|           |          |       |              |          |                    |         |                                                                                                                                                                                                                                             |          |                                                                          |       |      |                                                           |                                                                                                                                                                                                                                                                    |                                                           |                                                                                                                                                                                                                                                                                                                                                                                                                                                                                                                                                                                                                                                                                       |
|-----------|----------|-------|--------------|----------|--------------------|---------|---------------------------------------------------------------------------------------------------------------------------------------------------------------------------------------------------------------------------------------------|----------|--------------------------------------------------------------------------|-------|------|-----------------------------------------------------------|--------------------------------------------------------------------------------------------------------------------------------------------------------------------------------------------------------------------------------------------------------------------|-----------------------------------------------------------|---------------------------------------------------------------------------------------------------------------------------------------------------------------------------------------------------------------------------------------------------------------------------------------------------------------------------------------------------------------------------------------------------------------------------------------------------------------------------------------------------------------------------------------------------------------------------------------------------------------------------------------------------------------------------------------|
| 209430_at | AJ001017 | BTAF1 | Homo sapiens | 6-Oct-14 | Consensus sequence | GenBank | Consensus includes gb:AJ001017.2 /DEF=Homo sapiens partial mRNA for TBP-associated factor 170 (TAFII170). /FEA=mRNA /GEN=TAFII170 /PROD=TBP associated factor /DB_XREF=gj:7018281 /UG=Hs.180930 TBP-associated factor 172 /FL=gb:AF038362.1 | AJ001017 | BTAF1 RNA polymerase II, B-TFIID transcription factor-associated, 170kDa | BTAF1 | 9044 | NM_003972 /// XM_005270265 /// XM_005270266 /// XR_246113 | 0008152 // metabolic process // inferred from electronic annotation /// 0035562 // negative regulation of chromatin binding // inferred from mutant phenotype /// 0045892 // negative regulation of transcription, DNA-templated // non-traceable author statement | 0005634 // nucleus // inferred from electronic annotation | 0000166 // nucleotide binding // inferred from electronic annotation /// 0003676 // nucleic acid binding // inferred from electronic annotation /// 0003677 // DNA binding // inferred from electronic annotation /// 0003700 // sequence-specific DNA binding transcription factor activity // non-traceable author statement /// 0004386 // helicase activity // inferred from electronic annotation /// 0005488 // binding // inferred from electronic annotation /// 0005515 // protein binding // inferred from electronic annotation /// 0005524 // ATP binding // inferred from electronic annotation /// 0016787 // hydrolase activity // inferred from electronic annotation |
|-----------|----------|-------|--------------|----------|--------------------|---------|---------------------------------------------------------------------------------------------------------------------------------------------------------------------------------------------------------------------------------------------|----------|--------------------------------------------------------------------------|-------|------|-----------------------------------------------------------|--------------------------------------------------------------------------------------------------------------------------------------------------------------------------------------------------------------------------------------------------------------------|-----------------------------------------------------------|---------------------------------------------------------------------------------------------------------------------------------------------------------------------------------------------------------------------------------------------------------------------------------------------------------------------------------------------------------------------------------------------------------------------------------------------------------------------------------------------------------------------------------------------------------------------------------------------------------------------------------------------------------------------------------------|

|             |          |       |              |          |                   |         |                                                                                                                                                                                                                                                                                        |          |                              |       |       |                                                        |                                                                                                                                                                                                                                                                                                                                                                                                                                                                                                                                                                                                                                            |                                                                                                                           |                                                                                                                                                                                                                                                                                                                                                                                                                                                                                                        |
|-------------|----------|-------|--------------|----------|-------------------|---------|----------------------------------------------------------------------------------------------------------------------------------------------------------------------------------------------------------------------------------------------------------------------------------------|----------|------------------------------|-------|-------|--------------------------------------------------------|--------------------------------------------------------------------------------------------------------------------------------------------------------------------------------------------------------------------------------------------------------------------------------------------------------------------------------------------------------------------------------------------------------------------------------------------------------------------------------------------------------------------------------------------------------------------------------------------------------------------------------------------|---------------------------------------------------------------------------------------------------------------------------|--------------------------------------------------------------------------------------------------------------------------------------------------------------------------------------------------------------------------------------------------------------------------------------------------------------------------------------------------------------------------------------------------------------------------------------------------------------------------------------------------------|
| 209497_s_at | BC003503 | RBM4B | Homo sapiens | 6-Oct-14 | Exemplar sequence | GenBank | gb:BC003503.1 /DEF=Homo sapiens, Similar to RIKEN cDNA 4921506122 gene, clone MGC:10380, mRNA, complete cds. /FEA=mRNA /PROD=Similar to RIKEN cDNA 4921506122 gene /DB_XREF=gj:13097557 /UG=Hs.49994 Homo sapiens, clone MGC:10871, mRNA, complete cds /FL=gb:BC003503.1 gb:BC004951.1 | BC003503 | RNA binding motif protein 4B | RBM4B | 83759 | NM_001286135 /// NM_031492 /// XR_247213 /// XR_247214 | 0006397 // mRNA processing // inferred from electronic annotation /// 0006417 // regulation of translation // inferred from sequence or structural similarity /// 0007623 // circadian rhythm // inferred from sequence or structural similarity /// 0008380 // RNA splicing // inferred from electronic annotation /// 0010628 // positive regulation of gene expression // inferred from electronic annotation /// 0032922 // circadian regulation of gene expression // inferred from sequence or structural similarity /// 0043153 // entrainment of circadian clock by photoperiod // inferred from sequence or structural similarity | 0005634 // nucleus // inferred from electronic annotation /// 0005730 // nucleolus // inferred from electronic annotation | 0000166 // nucleotide binding // inferred from electronic annotation /// 0003676 // nucleic acid binding // inferred from electronic annotation /// 0003723 // RNA binding // inferred from electronic annotation /// 0005515 // protein binding // inferred from physical interaction /// 0008270 // zinc ion binding // inferred from electronic annotation /// 0044822 // poly(A) RNA binding // inferred from direct assay /// 0046872 // metal ion binding // inferred from electronic annotation |
|-------------|----------|-------|--------------|----------|-------------------|---------|----------------------------------------------------------------------------------------------------------------------------------------------------------------------------------------------------------------------------------------------------------------------------------------|----------|------------------------------|-------|-------|--------------------------------------------------------|--------------------------------------------------------------------------------------------------------------------------------------------------------------------------------------------------------------------------------------------------------------------------------------------------------------------------------------------------------------------------------------------------------------------------------------------------------------------------------------------------------------------------------------------------------------------------------------------------------------------------------------------|---------------------------------------------------------------------------------------------------------------------------|--------------------------------------------------------------------------------------------------------------------------------------------------------------------------------------------------------------------------------------------------------------------------------------------------------------------------------------------------------------------------------------------------------------------------------------------------------------------------------------------------------|

|             |          |      |              |          |                    |         |                                                                                                                                                                                                                                             |          |                                     |      |      |                                                                                                    |                                                                                                                                                                                                                                                                                                                                                                                                                                                                                                                                                                                                                                                                                |                                                                                                                                                                                                                                                                                                  |                                                                                                                                                                                                                                                                                                                                                                                                                                                                                                                                                    |
|-------------|----------|------|--------------|----------|--------------------|---------|---------------------------------------------------------------------------------------------------------------------------------------------------------------------------------------------------------------------------------------------|----------|-------------------------------------|------|------|----------------------------------------------------------------------------------------------------|--------------------------------------------------------------------------------------------------------------------------------------------------------------------------------------------------------------------------------------------------------------------------------------------------------------------------------------------------------------------------------------------------------------------------------------------------------------------------------------------------------------------------------------------------------------------------------------------------------------------------------------------------------------------------------|--------------------------------------------------------------------------------------------------------------------------------------------------------------------------------------------------------------------------------------------------------------------------------------------------|----------------------------------------------------------------------------------------------------------------------------------------------------------------------------------------------------------------------------------------------------------------------------------------------------------------------------------------------------------------------------------------------------------------------------------------------------------------------------------------------------------------------------------------------------|
| 209579_s_at | AL556619 | MBD4 | Homo sapiens | 6-Oct-14 | Consensus sequence | GenBank | Consensus includes<br>gb:AL556619<br>/FEA=EST<br>/DB_XREF=gj:12899460<br>/DB_XREF=est:AL556619<br>/CLONE=CSODK006YH06 (5 prime)<br>/UG=Hs.35947 methyl-CpG binding domain protein 4<br>/FL=gb:AF072250.1<br>gb:NM_003925.1<br>gb:AF114784.1 | AL556619 | methyl-CpG binding domain protein 4 | MBD4 | 8930 | NM_001276270<br>///<br>NM_001276271<br>///<br>NM_001276272<br>///<br>NM_001276273<br>/// NM_003925 | 0000737 // DNA catabolic process, endonucleolytic<br>// traceable author statement /// 0006281 // DNA repair // traceable author statement /// 0006284 // base-excision repair // traceable author statement /// 0006285 // base-excision repair, AP site formation // traceable author statement /// 0006974 // cellular response to DNA damage stimulus // inferred from electronic annotation /// 0007095 // mitotic G2 DNA damage checkpoint // inferred from electronic annotation /// 0008630 // intrinsic apoptotic signaling pathway in response to DNA damage // inferred from electronic annotation /// 0009314 // response to radiation // inferred from electronic | 0000785 // chromatin // inferred from electronic annotation /// 0005634 // nucleus // inferred from direct assay /// 0005654 // nucleoplasm // traceable author statement /// 0005730 // nucleolus // inferred from direct assay /// 0005737 // cytoplasm // inferred from electronic annotation | 0003677 // DNA binding // inferred from electronic annotation /// 0003696 // satellite DNA binding // traceable author statement /// 0003824 // catalytic activity // inferred from electronic annotation /// 0004520 // endodeoxyribonuclease activity // traceable author statement /// 0005515 // protein binding // inferred from physical interaction /// 0008263 // pyrimidine-specific mismatch base pair DNA N-glycosylase activity // inferred from direct assay /// 0016787 // hydrolase activity // inferred from electronic annotation |
|-------------|----------|------|--------------|----------|--------------------|---------|---------------------------------------------------------------------------------------------------------------------------------------------------------------------------------------------------------------------------------------------|----------|-------------------------------------|------|------|----------------------------------------------------------------------------------------------------|--------------------------------------------------------------------------------------------------------------------------------------------------------------------------------------------------------------------------------------------------------------------------------------------------------------------------------------------------------------------------------------------------------------------------------------------------------------------------------------------------------------------------------------------------------------------------------------------------------------------------------------------------------------------------------|--------------------------------------------------------------------------------------------------------------------------------------------------------------------------------------------------------------------------------------------------------------------------------------------------|----------------------------------------------------------------------------------------------------------------------------------------------------------------------------------------------------------------------------------------------------------------------------------------------------------------------------------------------------------------------------------------------------------------------------------------------------------------------------------------------------------------------------------------------------|

|             |          |      |              |          |                   |         |                                                                                                                                                                                                                                                                          |          |                                     |      |      |                                                                               |                                                                                                                                                                                                                                                                                                                                                                                                                                                                                                                                                                                                                                                                             |                                                                                                                                                                                                                                                                                                  |                                                                                                                                                                                                                                                                                                                                                                                                                                                                                                                                                    |
|-------------|----------|------|--------------|----------|-------------------|---------|--------------------------------------------------------------------------------------------------------------------------------------------------------------------------------------------------------------------------------------------------------------------------|----------|-------------------------------------|------|------|-------------------------------------------------------------------------------|-----------------------------------------------------------------------------------------------------------------------------------------------------------------------------------------------------------------------------------------------------------------------------------------------------------------------------------------------------------------------------------------------------------------------------------------------------------------------------------------------------------------------------------------------------------------------------------------------------------------------------------------------------------------------------|--------------------------------------------------------------------------------------------------------------------------------------------------------------------------------------------------------------------------------------------------------------------------------------------------|----------------------------------------------------------------------------------------------------------------------------------------------------------------------------------------------------------------------------------------------------------------------------------------------------------------------------------------------------------------------------------------------------------------------------------------------------------------------------------------------------------------------------------------------------|
| 209580_s_at | AF114784 | MBD4 | Homo sapiens | 6-Oct-14 | Exemplar sequence | GenBank | gb:AF114784.1 /DEF=Homo sapiens methyl-CpG binding endonuclease (MED1) mRNA, complete cds. /FEA=mRNA /GEN=MED1 /PROD=methyl-CpG binding endonuclease /DB_XREF=gi:4539758 /UG=Hs.35947 methyl-CpG binding domain protein 4 /FL=gb:AF072250.1 gb:NM_003925.1 gb:AF114784.1 | AF114784 | methyl-CpG binding domain protein 4 | MBD4 | 8930 | NM_001276270 /// NM_001276271 /// NM_001276272 /// NM_001276273 /// NM_003925 | 0000737 // DNA catabolic process, endonucleolytic // traceable author statement /// 0006281 // DNA repair // traceable author statement /// 0006284 // base-excision repair // traceable author statement /// 0006285 // base-excision repair, AP site formation // traceable author statement /// 0006974 // cellular response to DNA damage stimulus // inferred from electronic annotation /// 0007095 // mitotic G2 DNA damage checkpoint // inferred from electronic annotation /// 0008630 // intrinsic apoptotic signaling pathway in response to DNA damage // inferred from electronic annotation /// 0009314 // response to radiation // inferred from electronic | 0000785 // chromatin // inferred from electronic annotation /// 0005634 // nucleus // inferred from direct assay /// 0005654 // nucleoplasm // traceable author statement /// 0005730 // nucleolus // inferred from direct assay /// 0005737 // cytoplasm // inferred from electronic annotation | 0003677 // DNA binding // inferred from electronic annotation /// 0003696 // satellite DNA binding // traceable author statement /// 0003824 // catalytic activity // inferred from electronic annotation /// 0004520 // endodeoxyribonuclease activity // traceable author statement /// 0005515 // protein binding // inferred from physical interaction /// 0008263 // pyrimidine-specific mismatch base pair DNA N-glycosylase activity // inferred from direct assay /// 0016787 // hydrolase activity // inferred from electronic annotation |
|-------------|----------|------|--------------|----------|-------------------|---------|--------------------------------------------------------------------------------------------------------------------------------------------------------------------------------------------------------------------------------------------------------------------------|----------|-------------------------------------|------|------|-------------------------------------------------------------------------------|-----------------------------------------------------------------------------------------------------------------------------------------------------------------------------------------------------------------------------------------------------------------------------------------------------------------------------------------------------------------------------------------------------------------------------------------------------------------------------------------------------------------------------------------------------------------------------------------------------------------------------------------------------------------------------|--------------------------------------------------------------------------------------------------------------------------------------------------------------------------------------------------------------------------------------------------------------------------------------------------|----------------------------------------------------------------------------------------------------------------------------------------------------------------------------------------------------------------------------------------------------------------------------------------------------------------------------------------------------------------------------------------------------------------------------------------------------------------------------------------------------------------------------------------------------|



|           |        |       |              |          |                    |         |                                                                                                                                                                                  |        |                                        |       |       |                                                                               |                                                                                                                                                                                                                                                                                                                                                                                                                                                                                                                                                                                                                                                   |                                                                                                                                                                                                                                                                                                                                                                                                 |                                                                                                                                                                                                                                                                                                                                                                                                                                                                                                                                                                                                                                                                                                                                                           |
|-----------|--------|-------|--------------|----------|--------------------|---------|----------------------------------------------------------------------------------------------------------------------------------------------------------------------------------|--------|----------------------------------------|-------|-------|-------------------------------------------------------------------------------|---------------------------------------------------------------------------------------------------------------------------------------------------------------------------------------------------------------------------------------------------------------------------------------------------------------------------------------------------------------------------------------------------------------------------------------------------------------------------------------------------------------------------------------------------------------------------------------------------------------------------------------------------|-------------------------------------------------------------------------------------------------------------------------------------------------------------------------------------------------------------------------------------------------------------------------------------------------------------------------------------------------------------------------------------------------|-----------------------------------------------------------------------------------------------------------------------------------------------------------------------------------------------------------------------------------------------------------------------------------------------------------------------------------------------------------------------------------------------------------------------------------------------------------------------------------------------------------------------------------------------------------------------------------------------------------------------------------------------------------------------------------------------------------------------------------------------------------|
| 209701_at | D16217 | ERAP1 | Homo sapiens | 6-Oct-14 | Consensus sequence | GenBank | Consensus includes gb:D16217.1 /DEF=Human mRNA for calpastatin, complete cds. /FEA=mRNA /GEN=CAST /PROD=calpastatin /DB_XREF=gi:303598 /UG=Hs.279607 calpastatin /FL=gb:D16217.1 | D16217 | endoplasmic reticulum aminopeptidase 1 | ERAP1 | 51752 | NM_001040458 /// NM_001198541 /// NM_016442 /// XM_005272015 /// XM_005272016 | 0001525 // angiogenesis // traceable author statement /// 0002376 // immune system process // inferred from electronic annotation /// 0002474 // antigen processing and presentation of peptide antigen via MHC class I // traceable author statement /// 0006508 // proteolysis // inferred from electronic annotation /// 0006509 // membrane protein ectodomain proteolysis // inferred from direct assay /// 0008217 // regulation of blood pressure // non-traceable author statement /// 0008217 // regulation of blood pressure // traceable author statement /// 0009617 // response to bacterium // inferred from expression pattern /// | 0005576 // extracellular region // inferred from direct assay /// 0005615 // extracellular space // inferred from direct assay /// 0005737 // cytoplasm // inferred from electronic annotation /// 0005783 // endoplasmic reticulum // non-traceable author statement /// 0005788 // endoplasmic reticulum lumen // traceable author statement /// 0005789 // endoplasmic reticulum membrane // | 0004177 // aminopeptidase activity // inferred from direct assay /// 0005138 // interleukin-6 receptor binding // inferred from physical interaction /// 0005151 // interleukin-1, Type II receptor binding // traceable author statement /// 0005515 // protein binding // inferred from physical interaction /// 0008233 // peptidase activity // inferred from electronic annotation /// 0008235 // metalloexopeptidase activity // inferred from direct assay /// 0008237 // metallopeptidase activity // inferred from electronic annotation /// 0008270 // zinc ion binding // non-traceable author statement /// 0016787 // hydrolase activity // inferred from electronic annotation /// 0046872 // metal ion binding // inferred from electronic |
|-----------|--------|-------|--------------|----------|--------------------|---------|----------------------------------------------------------------------------------------------------------------------------------------------------------------------------------|--------|----------------------------------------|-------|-------|-------------------------------------------------------------------------------|---------------------------------------------------------------------------------------------------------------------------------------------------------------------------------------------------------------------------------------------------------------------------------------------------------------------------------------------------------------------------------------------------------------------------------------------------------------------------------------------------------------------------------------------------------------------------------------------------------------------------------------------------|-------------------------------------------------------------------------------------------------------------------------------------------------------------------------------------------------------------------------------------------------------------------------------------------------------------------------------------------------------------------------------------------------|-----------------------------------------------------------------------------------------------------------------------------------------------------------------------------------------------------------------------------------------------------------------------------------------------------------------------------------------------------------------------------------------------------------------------------------------------------------------------------------------------------------------------------------------------------------------------------------------------------------------------------------------------------------------------------------------------------------------------------------------------------------|

|           |          |        |              |          |                   |         |                                                                                                                                                                                                                                                                                                                                  |          |                                         |        |      |           |  |                                                                                                                                                                                                                                    |                                                                        |
|-----------|----------|--------|--------------|----------|-------------------|---------|----------------------------------------------------------------------------------------------------------------------------------------------------------------------------------------------------------------------------------------------------------------------------------------------------------------------------------|----------|-----------------------------------------|--------|------|-----------|--|------------------------------------------------------------------------------------------------------------------------------------------------------------------------------------------------------------------------------------|------------------------------------------------------------------------|
| 209732_at | BC005254 | CLEC2B | Homo sapiens | 6-Oct-14 | Exemplar sequence | GenBank | gb:BC005254.1 /DEF=Homo sapiens, Similar to C-type (calcium dependent, carbohydrate-recognition domain) lectin, superfamily member 2 (activation-induced), clone MGC:12289, mRNA, complete cds. /FEA=mRNA /PROD=Similar to C-type (calcium dependent, carbohydrate-recognition domain) lectin, superfamily member 2 (activation- | BC005254 | C-type lectin domain family 2, member B | CLEC2B | 9976 | NM_005127 |  | 0005887 // integral component of plasma membrane // traceable author statement /// 0016020 // membrane // inferred from electronic annotation /// 0016021 // integral component of membrane // inferred from electronic annotation | 0030246 // carbohydrate binding // inferred from electronic annotation |
|-----------|----------|--------|--------------|----------|-------------------|---------|----------------------------------------------------------------------------------------------------------------------------------------------------------------------------------------------------------------------------------------------------------------------------------------------------------------------------------|----------|-----------------------------------------|--------|------|-----------|--|------------------------------------------------------------------------------------------------------------------------------------------------------------------------------------------------------------------------------------|------------------------------------------------------------------------|

|             |          |      |              |          |                    |         |                                                                                                                                                                                                                           |          |               |      |       |                                                                                                                                   |                                                                                                                                                                                                                                                                                                                                                                                                                                                                                                                                                                                                                                                                                              |                                                                                                                                                                                                                                                                                                                                               |                                                                                                                                                                                                                                                                                                                           |
|-------------|----------|------|--------------|----------|--------------------|---------|---------------------------------------------------------------------------------------------------------------------------------------------------------------------------------------------------------------------------|----------|---------------|------|-------|-----------------------------------------------------------------------------------------------------------------------------------|----------------------------------------------------------------------------------------------------------------------------------------------------------------------------------------------------------------------------------------------------------------------------------------------------------------------------------------------------------------------------------------------------------------------------------------------------------------------------------------------------------------------------------------------------------------------------------------------------------------------------------------------------------------------------------------------|-----------------------------------------------------------------------------------------------------------------------------------------------------------------------------------------------------------------------------------------------------------------------------------------------------------------------------------------------|---------------------------------------------------------------------------------------------------------------------------------------------------------------------------------------------------------------------------------------------------------------------------------------------------------------------------|
| 209771_x_at | AA761181 | CD24 | Homo sapiens | 6-Oct-14 | Consensus sequence | GenBank | Consensus includes<br>gb:AA761181<br>/FEA=EST<br>/DB_XREF=gi:2810111<br>/DB_XREF=est:nz09g03.s1<br>/CLONE=IMAGE:1287316<br>/UG=Hs.286124<br>CD24 antigen (small cell lung carcinoma cluster 4 antigen)<br>/FL=gb:X69397.1 | AA761181 | CD24 molecule | CD24 | 1E+08 | NM_001291737<br>///<br>NM_001291738<br>///<br>NM_001291739<br>/// NM_013230<br>/// NR_117089 ///<br>NR_117090 ///<br>XM_005278329 | 0001666 // response to hypoxia // inferred from expression pattern ///<br>0001775 // cell activation // inferred from direct assay ///<br>0001959 // regulation of cytokine-mediated signaling pathway // inferred from sequence or structural similarity ///<br>0002237 // response to molecule of bacterial origin // inferred from sequence or structural similarity ///<br>0002768 // immune response-regulating cell surface receptor signaling pathway // inferred by curator ///<br>0007155 // cell adhesion // inferred from electronic annotation ///<br>0007204 // positive regulation of cytosolic calcium ion concentration // inferred from direct assay ///<br>0007411 // axon | 0005886 // plasma membrane // inferred from electronic annotation ///<br>0009986 // cell surface // inferred from direct assay ///<br>0016020 // membrane // inferred from direct assay ///<br>0031225 // anchored component of membrane // inferred from electronic annotation ///<br>0045121 // membrane raft // inferred from direct assay | 0004871 // signal transducer activity // non-traceable author statement ///<br>0005515 // protein binding // inferred from physical interaction ///<br>0019901 // protein kinase binding // inferred from physical interaction ///<br>0030296 // protein tyrosine kinase activator activity // inferred from direct assay |
|-------------|----------|------|--------------|----------|--------------------|---------|---------------------------------------------------------------------------------------------------------------------------------------------------------------------------------------------------------------------------|----------|---------------|------|-------|-----------------------------------------------------------------------------------------------------------------------------------|----------------------------------------------------------------------------------------------------------------------------------------------------------------------------------------------------------------------------------------------------------------------------------------------------------------------------------------------------------------------------------------------------------------------------------------------------------------------------------------------------------------------------------------------------------------------------------------------------------------------------------------------------------------------------------------------|-----------------------------------------------------------------------------------------------------------------------------------------------------------------------------------------------------------------------------------------------------------------------------------------------------------------------------------------------|---------------------------------------------------------------------------------------------------------------------------------------------------------------------------------------------------------------------------------------------------------------------------------------------------------------------------|

|             |        |      |              |          |                   |         |                                                                                                                                                                                                                |        |               |      |       |                                                                                                           |                                                                                                                                                                                                                                                                                                                                                                                                                                                                                                                                                                                                                                                                         |                                                                                                                                                                                                                                                                                                                                   |                                                                                                                                                                                                                                                                                                                  |
|-------------|--------|------|--------------|----------|-------------------|---------|----------------------------------------------------------------------------------------------------------------------------------------------------------------------------------------------------------------|--------|---------------|------|-------|-----------------------------------------------------------------------------------------------------------|-------------------------------------------------------------------------------------------------------------------------------------------------------------------------------------------------------------------------------------------------------------------------------------------------------------------------------------------------------------------------------------------------------------------------------------------------------------------------------------------------------------------------------------------------------------------------------------------------------------------------------------------------------------------------|-----------------------------------------------------------------------------------------------------------------------------------------------------------------------------------------------------------------------------------------------------------------------------------------------------------------------------------|------------------------------------------------------------------------------------------------------------------------------------------------------------------------------------------------------------------------------------------------------------------------------------------------------------------|
| 209772_s_at | X69397 | CD24 | Homo sapiens | 6-Oct-14 | Exemplar sequence | GenBank | gb:X69397.1 /DEF=H.sapiens CD24 gene, complete CDS. /FEA=mRNA /GEN=CD24 /PROD=cell surface antigen /DB_XREF=gi:396167 /UG=Hs.286124 CD24 antigen (small cell lung carcinoma cluster 4 antigen) /FL=gb:X69397.1 | X69397 | CD24 molecule | CD24 | 1E+08 | NM_001291737 /// NM_001291738 /// NM_001291739 /// NM_013230 /// NR_117089 /// NR_117090 /// XM_005278329 | 0001666 // response to hypoxia // inferred from expression pattern /// 0001775 // cell activation // inferred from direct assay /// 0001959 // regulation of cytokine-mediated signaling pathway // inferred from sequence or structural similarity /// 0002237 // response to molecule of bacterial origin // inferred from sequence or structural similarity /// 0002768 // immune response-regulating cell surface receptor signaling pathway // inferred by curator /// 0007155 // cell adhesion // inferred from electronic annotation /// 0007204 // positive regulation of cytosolic calcium ion concentration // inferred from direct assay /// 0007411 // axon | 0005886 // plasma membrane // inferred from electronic annotation /// 0009986 // cell surface // inferred from direct assay /// 0016020 // membrane // inferred from direct assay /// 0031225 // anchored component of membrane // inferred from electronic annotation /// 0045121 // membrane raft // inferred from direct assay | 0004871 // signal transducer activity // non-traceable author statement /// 0005515 // protein binding // inferred from physical interaction /// 0019901 // protein kinase binding // inferred from physical interaction /// 0030296 // protein tyrosine kinase activator activity // inferred from direct assay |
|-------------|--------|------|--------------|----------|-------------------|---------|----------------------------------------------------------------------------------------------------------------------------------------------------------------------------------------------------------------|--------|---------------|------|-------|-----------------------------------------------------------------------------------------------------------|-------------------------------------------------------------------------------------------------------------------------------------------------------------------------------------------------------------------------------------------------------------------------------------------------------------------------------------------------------------------------------------------------------------------------------------------------------------------------------------------------------------------------------------------------------------------------------------------------------------------------------------------------------------------------|-----------------------------------------------------------------------------------------------------------------------------------------------------------------------------------------------------------------------------------------------------------------------------------------------------------------------------------|------------------------------------------------------------------------------------------------------------------------------------------------------------------------------------------------------------------------------------------------------------------------------------------------------------------|

|           |          |       |              |          |                   |         |                                                                                                                                                                                                                                                   |          |                                             |       |       |                                                                                                                                                                         |                                                                                                                                                                                 |                                                                                                                              |                                                               |
|-----------|----------|-------|--------------|----------|-------------------|---------|---------------------------------------------------------------------------------------------------------------------------------------------------------------------------------------------------------------------------------------------------|----------|---------------------------------------------|-------|-------|-------------------------------------------------------------------------------------------------------------------------------------------------------------------------|---------------------------------------------------------------------------------------------------------------------------------------------------------------------------------|------------------------------------------------------------------------------------------------------------------------------|---------------------------------------------------------------|
| 209780_at | AL136883 | PHTF2 | Homo sapiens | 6-Oct-14 | Exemplar sequence | GenBank | gb:AL136883.1<br>/DEF=Homo sapiens mRNA; cDNA DKFZp434D166 (from clone DKFZp434D166); complete cds. /FEA=mRNA /GEN=DKFZp434D166 /PROD=hypothetical protein /DB_XREF=gi:12053266 /UG=Hs.128653 hypothetical protein DKFZp564F013 /FL=gb:AL136883.1 | AL136883 | putative homeodomain transcription factor 2 | PHTF2 | 57157 | NM_001127357<br>///<br>NM_001127358<br>///<br>NM_001127359<br>///<br>NM_001127360<br>/// NM_020432<br>///<br>XM_005250508<br>///<br>XM_005250509<br>///<br>XM_006716063 | 0006351 // transcription, DNA-templated // inferred from electronic annotation /// 0006355 // regulation of transcription, DNA-templated // inferred from electronic annotation | 0005634 // nucleus // inferred from electronic annotation /// 0005783 // endoplasmic reticulum // inferred from direct assay | 0003677 // DNA binding // inferred from electronic annotation |
|-----------|----------|-------|--------------|----------|-------------------|---------|---------------------------------------------------------------------------------------------------------------------------------------------------------------------------------------------------------------------------------------------------|----------|---------------------------------------------|-------|-------|-------------------------------------------------------------------------------------------------------------------------------------------------------------------------|---------------------------------------------------------------------------------------------------------------------------------------------------------------------------------|------------------------------------------------------------------------------------------------------------------------------|---------------------------------------------------------------|

|             |          |         |              |          |                   |         |                                                                                                                                                                                                                                                                                                    |          |                                                              |         |      |                                                                                                |                                                                                                                                                                                                                                                                                                                                                                                                                                                                                                                                                                                                                                                              |                                                                                                                                                                                                                                                                                                                                                                                               |                                                                                                                                                                                                                                                                                                                                                                                                    |
|-------------|----------|---------|--------------|----------|-------------------|---------|----------------------------------------------------------------------------------------------------------------------------------------------------------------------------------------------------------------------------------------------------------------------------------------------------|----------|--------------------------------------------------------------|---------|------|------------------------------------------------------------------------------------------------|--------------------------------------------------------------------------------------------------------------------------------------------------------------------------------------------------------------------------------------------------------------------------------------------------------------------------------------------------------------------------------------------------------------------------------------------------------------------------------------------------------------------------------------------------------------------------------------------------------------------------------------------------------------|-----------------------------------------------------------------------------------------------------------------------------------------------------------------------------------------------------------------------------------------------------------------------------------------------------------------------------------------------------------------------------------------------|----------------------------------------------------------------------------------------------------------------------------------------------------------------------------------------------------------------------------------------------------------------------------------------------------------------------------------------------------------------------------------------------------|
| 209785_s_at | AF065214 | PLA2G4C | Homo sapiens | 6-Oct-14 | Exemplar sequence | GenBank | gb:AF065214.1 /DEF=Homo sapiens cytosolic phospholipase A2 gamma (cPLA2 gamma) mRNA, complete cds. /FEA=mRNA /GEN=cPLA2 gamma /PROD=cytosolic phospholipase A2 gamma /DB_XREF=gi:3811344 /UG=Hs.18858 phospholipase A2, group IVC (cytosolic, calcium-independent) /FL=gb:AF058921.1 gb:AF065214.1 | AF065214 | phospholipase A2, group IVC (cytosolic, calcium-independent) | PLA2G4C | 8605 | NM_001159322 /// NM_001159323 /// NM_003706 /// XM_006723451 /// XM_006723452 /// XM_006723453 | 0006629 // lipid metabolic process // inferred from electronic annotation /// 0006644 // phospholipid metabolic process // traceable author statement /// 0006954 // inflammatory response // non-traceable author statement /// 0007567 // parturition // non-traceable author statement /// 0008152 // metabolic process // inferred from electronic annotation /// 0009395 // phospholipid catabolic process // inferred from electronic annotation /// 0016042 // lipid catabolic process // inferred from electronic annotation /// 0019369 // arachidonic acid metabolic process // non-traceable author statement /// 0035556 // intracellular signal | 0005635 // nuclear envelope // inferred from electronic annotation /// 0005654 // nucleoplasm // inferred from electronic annotation /// 0005789 // endoplasmic reticulum membrane // traceable author statement /// 0005829 // cytosol // traceable author statement /// 0005938 // cell cortex // inferred from electronic annotation /// 0016020 // membrane // traceable author statement | 0004620 // phospholipase activity // inferred from electronic annotation /// 0004623 // phospholipase A2 activity // inferred from electronic annotation /// 0005543 // phospholipid binding // non-traceable author statement /// 0016787 // hydrolase activity // inferred from electronic annotation /// 0047499 // calcium-independent phospholipase A2 activity // inferred from direct assay |
|-------------|----------|---------|--------------|----------|-------------------|---------|----------------------------------------------------------------------------------------------------------------------------------------------------------------------------------------------------------------------------------------------------------------------------------------------------|----------|--------------------------------------------------------------|---------|------|------------------------------------------------------------------------------------------------|--------------------------------------------------------------------------------------------------------------------------------------------------------------------------------------------------------------------------------------------------------------------------------------------------------------------------------------------------------------------------------------------------------------------------------------------------------------------------------------------------------------------------------------------------------------------------------------------------------------------------------------------------------------|-----------------------------------------------------------------------------------------------------------------------------------------------------------------------------------------------------------------------------------------------------------------------------------------------------------------------------------------------------------------------------------------------|----------------------------------------------------------------------------------------------------------------------------------------------------------------------------------------------------------------------------------------------------------------------------------------------------------------------------------------------------------------------------------------------------|

|             |          |        |              |          |                   |         |                                                                                                                                                                                                                                                                                          |          |                                        |        |       |                                                                               |                                                                                                                                                                                                                                                                                                                                                                                                                                                                                                                                                                                                                                                   |                                                                                                                                                                                                                                                                                                                                                                                                 |                                                                                                                                                                                                                                                                                                                                                                                                                                                                                                                                                                                                                                                                                                                                                           |
|-------------|----------|--------|--------------|----------|-------------------|---------|------------------------------------------------------------------------------------------------------------------------------------------------------------------------------------------------------------------------------------------------------------------------------------------|----------|----------------------------------------|--------|-------|-------------------------------------------------------------------------------|---------------------------------------------------------------------------------------------------------------------------------------------------------------------------------------------------------------------------------------------------------------------------------------------------------------------------------------------------------------------------------------------------------------------------------------------------------------------------------------------------------------------------------------------------------------------------------------------------------------------------------------------------|-------------------------------------------------------------------------------------------------------------------------------------------------------------------------------------------------------------------------------------------------------------------------------------------------------------------------------------------------------------------------------------------------|-----------------------------------------------------------------------------------------------------------------------------------------------------------------------------------------------------------------------------------------------------------------------------------------------------------------------------------------------------------------------------------------------------------------------------------------------------------------------------------------------------------------------------------------------------------------------------------------------------------------------------------------------------------------------------------------------------------------------------------------------------------|
| 209788_s_at | AF183569 | ERAP1  | Homo sapiens | 6-Oct-14 | Exemplar sequence | GenBank | gb:AF183569.1 /DEF=Homo sapiens aminopeptidase PILS (APPILS) mRNA, complete cds. /FEA=mRNA /GEN=APPILS /PROD=aminopeptidase PILS /DB_XREF=gi:642986 /UG=Hs.247043 type 1 tumor necrosis factor receptor shedding aminopeptidase regulator /FL=gb:AF183569.1 gb:AF222340.1 gb:NM_016442.1 | AF183569 | endoplasmic reticulum aminopeptidase 1 | ERAP1  | 51752 | NM_001040458 /// NM_001198541 /// NM_016442 /// XM_005272015 /// XM_005272016 | 0001525 // angiogenesis // traceable author statement /// 0002376 // immune system process // inferred from electronic annotation /// 0002474 // antigen processing and presentation of peptide antigen via MHC class I // traceable author statement /// 0006508 // proteolysis // inferred from electronic annotation /// 0006509 // membrane protein ectodomain proteolysis // inferred from direct assay /// 0008217 // regulation of blood pressure // non-traceable author statement /// 0008217 // regulation of blood pressure // traceable author statement /// 0009617 // response to bacterium // inferred from expression pattern /// | 0005576 // extracellular region // inferred from direct assay /// 0005615 // extracellular space // inferred from direct assay /// 0005737 // cytoplasm // inferred from electronic annotation /// 0005783 // endoplasmic reticulum // non-traceable author statement /// 0005788 // endoplasmic reticulum lumen // traceable author statement /// 0005789 // endoplasmic reticulum membrane // | 0004177 // aminopeptidase activity // inferred from direct assay /// 0005138 // interleukin-6 receptor binding // inferred from physical interaction /// 0005151 // interleukin-1, Type II receptor binding // traceable author statement /// 0005515 // protein binding // inferred from physical interaction /// 0008233 // peptidase activity // inferred from electronic annotation /// 0008235 // metalloexopeptidase activity // inferred from direct assay /// 0008237 // metallopeptidase activity // inferred from electronic annotation /// 0008270 // zinc ion binding // non-traceable author statement /// 0016787 // hydrolase activity // inferred from electronic annotation /// 0046872 // metal ion binding // inferred from electronic |
| 209890_at   | AF065389 | TSPAN5 | Homo sapiens | 6-Oct-14 | Exemplar sequence | GenBank | gb:AF065389.1 /DEF=Homo sapiens tetraspan NET-4 mRNA, complete cds. /FEA=mRNA /PROD=tetraspan NET-4 /DB_XREF=gi:3152702 /UG=Hs.20709 tetraspan 5 /FL=gb:AF065389.1 gb:NM_005723.1                                                                                                        | AF065389 | tetraspanin 5                          | TSPAN5 | 10098 | NM_005723 /// XM_005262680 /// XR_244617                                      | 0045747 // positive regulation of Notch signaling pathway // inferred from mutant phenotype /// 0051604 // protein maturation // inferred from mutant phenotype /// 0090002 // establishment of protein localization to plasma membrane // inferred from mutant phenotype                                                                                                                                                                                                                                                                                                                                                                         | 0005886 // plasma membrane // inferred from direct assay /// 0016020 // membrane // inferred from electronic annotation /// 0016021 // integral component of membrane // inferred from electronic annotation                                                                                                                                                                                    | 0019899 // enzyme binding // inferred from physical interaction                                                                                                                                                                                                                                                                                                                                                                                                                                                                                                                                                                                                                                                                                           |

|           |          |        |              |          |                   |         |                                                                                                                                                                                                                             |          |                                       |        |     |                                                                                                                                                                                                                                                                                                   |                                                                                                                                                                                                                                                                                                                                                                                                                                                                                                                                                                                                                                     |                                                                                                                                                                  |                                                                                                                                                                                                                                                                                                                                                                                                                                                                                                                                                                                                                                                                 |
|-----------|----------|--------|--------------|----------|-------------------|---------|-----------------------------------------------------------------------------------------------------------------------------------------------------------------------------------------------------------------------------|----------|---------------------------------------|--------|-----|---------------------------------------------------------------------------------------------------------------------------------------------------------------------------------------------------------------------------------------------------------------------------------------------------|-------------------------------------------------------------------------------------------------------------------------------------------------------------------------------------------------------------------------------------------------------------------------------------------------------------------------------------------------------------------------------------------------------------------------------------------------------------------------------------------------------------------------------------------------------------------------------------------------------------------------------------|------------------------------------------------------------------------------------------------------------------------------------------------------------------|-----------------------------------------------------------------------------------------------------------------------------------------------------------------------------------------------------------------------------------------------------------------------------------------------------------------------------------------------------------------------------------------------------------------------------------------------------------------------------------------------------------------------------------------------------------------------------------------------------------------------------------------------------------------|
| 209979_at | AF001042 | ADARB1 | Homo sapiens | 6-Oct-14 | Exemplar sequence | GenBank | gb:AF001042.1 /DEF=Homo sapiens RNA editase (RED1) mRNA, complete cds. /FEA=mRNA /GEN=RED1 /PROD=RNA editase /DB_XREF=gi:2114492 /UG=Hs.85302 adenosine deaminase, RNA-specific, B1 (homolog of rat RED1) /FL=gb:AF001042.1 | AF001042 | adenosine deaminase, RNA-specific, B1 | ADARB1 | 104 | NM_001033049<br>/// NM_001112<br>///<br>NM_001160230<br>/// NM_015833<br>/// NM_015834<br>/// NR_027672 ///<br>NR_027673 ///<br>NR_027674 ///<br>NR_073200 ///<br>XM_006723953<br>///<br>XM_006723954<br>///<br>XM_006723955<br>///<br>XM_006723956<br>///<br>XM_006723957<br>///<br>XM_006723958 | 0002376 // immune system process // inferred from electronic annotation /// 0006382 // adenosine to inosine editing // inferred from direct assay /// 0006382 // adenosine to inosine editing // traceable author statement /// 0006396 // RNA processing // inferred from direct assay /// 0006397 // mRNA processing // inferred from electronic annotation /// 0008285 // negative regulation of cell proliferation // inferred from direct assay /// 0010467 // gene expression // traceable author statement /// 0016553 // base conversion or substitution editing // inferred by curator /// 0016556 // mRNA modification // | 0005634 // nucleus // inferred from direct assay /// 0005654 // nucleoplasm // traceable author statement /// 0005730 // nucleolus // inferred from direct assay | 0003723 // RNA binding // inferred from direct assay /// 0003725 // double-stranded RNA binding // inferred from direct assay /// 0003726 // double-stranded RNA adenosine deaminase activity // inferred from direct assay /// 0003729 // mRNA binding // traceable author statement /// 0004000 // adenosine deaminase activity // inferred from electronic annotation /// 0005515 // protein binding // inferred from physical interaction /// 0016787 // hydrolase activity // inferred from electronic annotation /// 0044822 // poly(A) RNA binding // inferred from direct assay /// 0046872 // metal ion binding // inferred from electronic annotation |
|-----------|----------|--------|--------------|----------|-------------------|---------|-----------------------------------------------------------------------------------------------------------------------------------------------------------------------------------------------------------------------------|----------|---------------------------------------|--------|-----|---------------------------------------------------------------------------------------------------------------------------------------------------------------------------------------------------------------------------------------------------------------------------------------------------|-------------------------------------------------------------------------------------------------------------------------------------------------------------------------------------------------------------------------------------------------------------------------------------------------------------------------------------------------------------------------------------------------------------------------------------------------------------------------------------------------------------------------------------------------------------------------------------------------------------------------------------|------------------------------------------------------------------------------------------------------------------------------------------------------------------|-----------------------------------------------------------------------------------------------------------------------------------------------------------------------------------------------------------------------------------------------------------------------------------------------------------------------------------------------------------------------------------------------------------------------------------------------------------------------------------------------------------------------------------------------------------------------------------------------------------------------------------------------------------------|



|             |          |       |              |          |                   |         |                                                                                                                                                                                                                                                                                   |          |                                        |       |       |                                                                               |                                                                                                                                                                                                                                                                                                                                                                                                                                                                                                                                                                                                                                                   |                                                                                                                                                                                                                                                                                                                                                                                                 |                                                                                                                                                                                                                                                                                                                                                                                                                                                                                                                                                                                                                                                                                                                                                           |
|-------------|----------|-------|--------------|----------|-------------------|---------|-----------------------------------------------------------------------------------------------------------------------------------------------------------------------------------------------------------------------------------------------------------------------------------|----------|----------------------------------------|-------|-------|-------------------------------------------------------------------------------|---------------------------------------------------------------------------------------------------------------------------------------------------------------------------------------------------------------------------------------------------------------------------------------------------------------------------------------------------------------------------------------------------------------------------------------------------------------------------------------------------------------------------------------------------------------------------------------------------------------------------------------------------|-------------------------------------------------------------------------------------------------------------------------------------------------------------------------------------------------------------------------------------------------------------------------------------------------------------------------------------------------------------------------------------------------|-----------------------------------------------------------------------------------------------------------------------------------------------------------------------------------------------------------------------------------------------------------------------------------------------------------------------------------------------------------------------------------------------------------------------------------------------------------------------------------------------------------------------------------------------------------------------------------------------------------------------------------------------------------------------------------------------------------------------------------------------------------|
| 210385_s_at | AF106037 | ERAP1 | Homo sapiens | 6-Oct-14 | Exemplar sequence | GenBank | gb:AF106037.1 /DEF=Homo sapiens adipocyte-derived leucine aminopeptidase mRNA, complete cds. /FEA=mRNA /PROD=adipocyte-derived leucine aminopeptidase /DB_XREF=gi:6381988 /UG=Hs.247043 type 1 tumor necrosis factor receptor shedding aminopeptidase regulator /FL=gb:AF106037.1 | AF106037 | endoplasmic reticulum aminopeptidase 1 | ERAP1 | 51752 | NM_001040458 /// NM_001198541 /// NM_016442 /// XM_005272015 /// XM_005272016 | 0001525 // angiogenesis // traceable author statement /// 0002376 // immune system process // inferred from electronic annotation /// 0002474 // antigen processing and presentation of peptide antigen via MHC class I // traceable author statement /// 0006508 // proteolysis // inferred from electronic annotation /// 0006509 // membrane protein ectodomain proteolysis // inferred from direct assay /// 0008217 // regulation of blood pressure // non-traceable author statement /// 0008217 // regulation of blood pressure // traceable author statement /// 0009617 // response to bacterium // inferred from expression pattern /// | 0005576 // extracellular region // inferred from direct assay /// 0005615 // extracellular space // inferred from direct assay /// 0005737 // cytoplasm // inferred from electronic annotation /// 0005783 // endoplasmic reticulum // non-traceable author statement /// 0005788 // endoplasmic reticulum lumen // traceable author statement /// 0005789 // endoplasmic reticulum membrane // | 0004177 // aminopeptidase activity // inferred from direct assay /// 0005138 // interleukin-6 receptor binding // inferred from physical interaction /// 0005151 // interleukin-1, Type II receptor binding // traceable author statement /// 0005515 // protein binding // inferred from physical interaction /// 0008233 // peptidase activity // inferred from electronic annotation /// 0008235 // metalloexopeptidase activity // inferred from direct assay /// 0008237 // metallopeptidase activity // inferred from electronic annotation /// 0008270 // zinc ion binding // non-traceable author statement /// 0016787 // hydrolase activity // inferred from electronic annotation /// 0046872 // metal ion binding // inferred from electronic |
|-------------|----------|-------|--------------|----------|-------------------|---------|-----------------------------------------------------------------------------------------------------------------------------------------------------------------------------------------------------------------------------------------------------------------------------------|----------|----------------------------------------|-------|-------|-------------------------------------------------------------------------------|---------------------------------------------------------------------------------------------------------------------------------------------------------------------------------------------------------------------------------------------------------------------------------------------------------------------------------------------------------------------------------------------------------------------------------------------------------------------------------------------------------------------------------------------------------------------------------------------------------------------------------------------------|-------------------------------------------------------------------------------------------------------------------------------------------------------------------------------------------------------------------------------------------------------------------------------------------------------------------------------------------------------------------------------------------------|-----------------------------------------------------------------------------------------------------------------------------------------------------------------------------------------------------------------------------------------------------------------------------------------------------------------------------------------------------------------------------------------------------------------------------------------------------------------------------------------------------------------------------------------------------------------------------------------------------------------------------------------------------------------------------------------------------------------------------------------------------------|

|             |          |         |              |          |                   |         |                                                                                                                                                                                          |          |                                                                                            |                                        |                                |                                                                                                                                                                                                                                            |  |                                                                                                                                                                                                                |  |
|-------------|----------|---------|--------------|----------|-------------------|---------|------------------------------------------------------------------------------------------------------------------------------------------------------------------------------------------|----------|--------------------------------------------------------------------------------------------|----------------------------------------|--------------------------------|--------------------------------------------------------------------------------------------------------------------------------------------------------------------------------------------------------------------------------------------|--|----------------------------------------------------------------------------------------------------------------------------------------------------------------------------------------------------------------|--|
| 210424_s_at | AF163441 | GOLGA8A | Homo sapiens | 6-Oct-14 | Exemplar sequence | GenBank | gb:AF163441.1 /DEF=Homo sapiens golgin 67 mRNA, complete cds. /FEA=mRNA /PROD=golgin 67 /DB_XREF=gi:6969979 /UG=Hs.182982 golgin-67 /FL=gb:AF163441.1 gb:AF164622.1                      | AF163441 | golgin A8 family, member A /// golgin A8 family, member B /// uncharacterized LOC101930583 | GOLGA8 A /// GOLGA8 B /// LOC101930583 | 23015 /// 440270 /// 101930583 | NM_001023567 /// NM_181077 /// NR_027409 /// NR_027410 /// XM_005254389 /// XM_005254391 /// XM_006720440 /// XM_006720530 /// XR_248092 /// XR_248093 /// XR_248094 /// XR_248096 /// XR_424599 /// XR_424600 /// XR_424601 /// XR_424602 |  | 0005794 // Golgi apparatus // inferred from electronic annotation /// 0016020 // membrane // inferred from electronic annotation /// 0032580 // Golgi cisterna membrane // inferred from electronic annotation |  |
| 210425_x_at | AF164622 | GOLGA8A | Homo sapiens | 6-Oct-14 | Exemplar sequence | GenBank | gb:AF164622.1 /DEF=Homo sapiens golgin-67 (GOLGA5) mRNA, complete cds. /FEA=mRNA /GEN=GOLGA5 /PROD=golgin-67 /DB_XREF=gi:7211437 /UG=Hs.182982 golgin-67 /FL=gb:AF163441.1 gb:AF164622.1 | AF164622 | golgin A8 family, member A /// golgin A8 family, member B /// uncharacterized LOC101930583 | GOLGA8 A /// GOLGA8 B /// LOC101930583 | 23015 /// 440270 /// 101930583 | NM_001023567 /// NM_181077 /// NR_027409 /// NR_027410 /// XM_005254389 /// XM_005254391 /// XM_006720440 /// XM_006720530 /// XR_248092 /// XR_248093 /// XR_248094 /// XR_248096 /// XR_424599 /// XR_424600 /// XR_424601 /// XR_424602 |  | 0005794 // Golgi apparatus // inferred from electronic annotation /// 0016020 // membrane // inferred from electronic annotation /// 0032580 // Golgi cisterna membrane // inferred from electronic annotation |  |

|             |          |       |              |          |                   |         |                                                                                                                                                                                                                |          |                                                 |                  |               |                                                                         |                                                                                                                                                                                                                                                                                                                                                                                                                                                                                                                                                                                                                                      |                                                                                                                                                                                                                                                                        |                                                                                                                                                                                                                                                                                                                                                                                                                                                                                                                                                                                                                               |
|-------------|----------|-------|--------------|----------|-------------------|---------|----------------------------------------------------------------------------------------------------------------------------------------------------------------------------------------------------------------|----------|-------------------------------------------------|------------------|---------------|-------------------------------------------------------------------------|--------------------------------------------------------------------------------------------------------------------------------------------------------------------------------------------------------------------------------------------------------------------------------------------------------------------------------------------------------------------------------------------------------------------------------------------------------------------------------------------------------------------------------------------------------------------------------------------------------------------------------------|------------------------------------------------------------------------------------------------------------------------------------------------------------------------------------------------------------------------------------------------------------------------|-------------------------------------------------------------------------------------------------------------------------------------------------------------------------------------------------------------------------------------------------------------------------------------------------------------------------------------------------------------------------------------------------------------------------------------------------------------------------------------------------------------------------------------------------------------------------------------------------------------------------------|
| 210655_s_at | AF041336 | FOXO3 | Homo sapiens | 6-Oct-14 | Exemplar sequence | GenBank | gb:AF041336.1 /DEF=Homo sapiens fork head-like protein (FKHRL1P2) mRNA, complete cds. /FEA=mRNA /GEN=FKHRL1P2 /PROD=fork head-like protein /DB_XREF=gi:4106722 /UG=Hs.14845 forkhead box O3A /FL=gb:AF041336.1 | AF041336 | forkhead box O3 /// forkhead box O3B pseudogene | FOXO3 /// FOXO3B | 2309 /// 2310 | NM_001455 /// NM_201559 /// NR_026718 /// XM_005266867 /// XM_005266868 | 0000122 // negative regulation of transcription from RNA polymerase II promoter // inferred from mutant phenotype /// 0001542 // ovulation from ovarian follicle // inferred from electronic annotation /// 0001544 // initiation of primordial ovarian follicle growth // inferred from electronic annotation /// 0001547 // antral ovarian follicle growth // inferred from electronic annotation /// 0001556 // oocyte maturation // inferred from electronic annotation /// 0006351 // transcription, DNA-templated // inferred from electronic annotation /// 0006355 // regulation of transcription, DNA-templated // inferred | 0005634 // nucleus // inferred from direct assay /// 0005654 // nucleoplasm // traceable author statement /// 0005737 // cytoplasm // inferred from direct assay /// 0005829 // cytosol // not recorded /// 0016020 // membrane // inferred from electronic annotation | 0001047 // core promoter binding // inferred from sequence or structural similarity /// 0003677 // DNA binding // inferred from direct assay /// 0003700 // sequence-specific DNA binding transcription factor activity // inferred from direct assay /// 0005515 // protein binding // inferred from physical interaction /// 0008301 // DNA binding, bending // not recorded /// 0019901 // protein kinase binding // inferred from physical interaction /// 0031490 // chromatin DNA binding // inferred from sequence or structural similarity /// 0043565 // sequence-specific DNA binding // inferred from direct assay |
|-------------|----------|-------|--------------|----------|-------------------|---------|----------------------------------------------------------------------------------------------------------------------------------------------------------------------------------------------------------------|----------|-------------------------------------------------|------------------|---------------|-------------------------------------------------------------------------|--------------------------------------------------------------------------------------------------------------------------------------------------------------------------------------------------------------------------------------------------------------------------------------------------------------------------------------------------------------------------------------------------------------------------------------------------------------------------------------------------------------------------------------------------------------------------------------------------------------------------------------|------------------------------------------------------------------------------------------------------------------------------------------------------------------------------------------------------------------------------------------------------------------------|-------------------------------------------------------------------------------------------------------------------------------------------------------------------------------------------------------------------------------------------------------------------------------------------------------------------------------------------------------------------------------------------------------------------------------------------------------------------------------------------------------------------------------------------------------------------------------------------------------------------------------|

|             |          |       |              |          |                    |         |                                                                                                                                                                                                                                                                                                                   |          |                                                    |       |       |                                                                                                                                                                                                                                                                          |                                                                                                                                                                                                                                                                                                                                                                                                                          |  |                                                                             |
|-------------|----------|-------|--------------|----------|--------------------|---------|-------------------------------------------------------------------------------------------------------------------------------------------------------------------------------------------------------------------------------------------------------------------------------------------------------------------|----------|----------------------------------------------------|-------|-------|--------------------------------------------------------------------------------------------------------------------------------------------------------------------------------------------------------------------------------------------------------------------------|--------------------------------------------------------------------------------------------------------------------------------------------------------------------------------------------------------------------------------------------------------------------------------------------------------------------------------------------------------------------------------------------------------------------------|--|-----------------------------------------------------------------------------|
| 210672_s_at | BC004185 | NPRL3 | Homo sapiens | 6-Oct-14 | Exemplar sequence  | GenBank | gb:BC004185.1 /DEF=Homo sapiens, Similar to Conserved gene telomeric to alpha globin cluster, clone MGC:2816, mRNA, complete cds. /FEA=mRNA /PROD=Similar to Conserved gene telomeric to alphaglobin cluster /DB_XREF=gi:13278839 /UG=Hs.19699 Conserved gene telomeric to alpha globin cluster /FL=gb:BC004185.1 | BC004185 | nitrogen permease regulator-like 3 (S. cerevisiae) | NPRL3 | 8131  | NM_001039476 ///<br>NM_001077350 ///<br>NM_001243247 ///<br>NM_001243248 ///<br>NM_001243249 ///<br>NM_012075                                                                                                                                                            | 0003281 // ventricular septum development // inferred from electronic annotation /// 0035909 // aorta morphogenesis // inferred from electronic annotation /// 0043547 // positive regulation of GTPase activity // inferred from electronic annotation /// 0048738 // cardiac muscle tissue development // inferred from electronic annotation /// 0060021 // palate development // inferred from electronic annotation |  | 0005096 // GTPase activator activity // inferred from electronic annotation |
| 210794_s_at | AF119863 | MEG3  | Homo sapiens | 6-Oct-14 | Consensus sequence | GenBank | Consensus includes gb:AF119863.1 /DEF=Homo sapiens PRO2160 mRNA, complete cds. /FEA=mRNA /PROD=PRO2160 /DB_XREF=gi:7770162 /UG=Hs.112844 maternally expressed 3 /FL=gb:AF119863.1                                                                                                                                 | AF119863 | maternally expressed 3 (non-protein coding)        | MEG3  | 55384 | NR_002766 ///<br>NR_003530 ///<br>NR_003531 ///<br>NR_033358 ///<br>NR_033359 ///<br>NR_033360 ///<br>NR_046464 ///<br>NR_046465 ///<br>NR_046466 ///<br>NR_046467 ///<br>NR_046468 ///<br>NR_046469 ///<br>NR_046470 ///<br>NR_046471 ///<br>NR_046472 ///<br>NR_046473 |                                                                                                                                                                                                                                                                                                                                                                                                                          |  |                                                                             |

|           |        |       |              |          |                   |         |                                                                                                                                                                                                                                                                         |        |                                                                           |       |      |                                                                                                                                             |                                                                                                                                                                                                                                                                                                                                                                                                                                                                                                                                                                                                                            |                                                                                                                                                                                                                                                                                   |                                                                                                                                                                                                                                                                                                                                                                                                                                                                                                                                     |
|-----------|--------|-------|--------------|----------|-------------------|---------|-------------------------------------------------------------------------------------------------------------------------------------------------------------------------------------------------------------------------------------------------------------------------|--------|---------------------------------------------------------------------------|-------|------|---------------------------------------------------------------------------------------------------------------------------------------------|----------------------------------------------------------------------------------------------------------------------------------------------------------------------------------------------------------------------------------------------------------------------------------------------------------------------------------------------------------------------------------------------------------------------------------------------------------------------------------------------------------------------------------------------------------------------------------------------------------------------------|-----------------------------------------------------------------------------------------------------------------------------------------------------------------------------------------------------------------------------------------------------------------------------------|-------------------------------------------------------------------------------------------------------------------------------------------------------------------------------------------------------------------------------------------------------------------------------------------------------------------------------------------------------------------------------------------------------------------------------------------------------------------------------------------------------------------------------------|
| 211020_at | L19659 | GCNT2 | Homo sapiens | 6-Oct-14 | Exemplar sequence | GenBank | gb:L19659.1 /DEF=Human I beta 1-6 N-acetylglucosaminyltransferase mRNA, complete cds. /FEA=mRNA /PROD=I beta 1-6 N-acetylglucosaminyltransferase /DB_XREF=gi:307297 /UG=Hs.934 glucosaminyl (N-acetyl) transferase 2, I-branching enzyme /FL=gb:L19659.1 gb:NM_001491.1 | L19659 | glucosaminyl (N-acetyl) transferase 2, I-branching enzyme (I blood group) | GCNT2 | 2651 | NM_001491 /// NM_145649 /// NM_145655 /// XM_005248997 /// XM_005248999 /// XM_006715052 /// XM_006715053 /// XM_006715054 /// XM_006715055 | 0006024 // glycosaminoglycan biosynthetic process // traceable author statement /// 0006486 // protein glycosylation // inferred from electronic annotation /// 0006486 // protein glycosylation // inferred from mutant phenotype /// 0007179 // transforming growth factor beta receptor signaling pathway // inferred from mutant phenotype /// 0007179 // transforming growth factor beta receptor signaling pathway // inferred from sequence or structural similarity /// 0007275 // multicellular organismal development // traceable author statement /// 0008152 // metabolic process // inferred from electronic | 0000139 // Golgi membrane // inferred from electronic annotation /// 0005794 // Golgi apparatus // inferred from electronic annotation /// 0016020 // membrane // traceable author statement /// 0016021 // integral component of membrane // inferred from electronic annotation | 0008109 // N-acetyllactosaminide beta-1,6-N-acetylglucosaminyltransferase activity // inferred from electronic annotation /// 0008109 // N-acetyllactosaminide beta-1,6-N-acetylglucosaminyltransferase activity // inferred from mutant phenotype /// 0008375 // acetylglucosaminyltransferase activity // inferred from electronic annotation /// 0016740 // transferase activity // inferred from electronic annotation /// 0016757 // transferase activity, transferring glycosyl groups // inferred from electronic annotation |
|-----------|--------|-------|--------------|----------|-------------------|---------|-------------------------------------------------------------------------------------------------------------------------------------------------------------------------------------------------------------------------------------------------------------------------|--------|---------------------------------------------------------------------------|-------|------|---------------------------------------------------------------------------------------------------------------------------------------------|----------------------------------------------------------------------------------------------------------------------------------------------------------------------------------------------------------------------------------------------------------------------------------------------------------------------------------------------------------------------------------------------------------------------------------------------------------------------------------------------------------------------------------------------------------------------------------------------------------------------------|-----------------------------------------------------------------------------------------------------------------------------------------------------------------------------------------------------------------------------------------------------------------------------------|-------------------------------------------------------------------------------------------------------------------------------------------------------------------------------------------------------------------------------------------------------------------------------------------------------------------------------------------------------------------------------------------------------------------------------------------------------------------------------------------------------------------------------------|

|           |        |      |              |          |                   |         |                                                                                                                                                                                                                                                                     |        |                |      |      |                                                                                                                                                                                                                                                                                             |                                                                                                                                                                                                                                                                                                                                                                                                                                                                                                                                                                                                                                                     |                                                                                                                                                     |                                                                                                                                                                                                                      |
|-----------|--------|------|--------------|----------|-------------------|---------|---------------------------------------------------------------------------------------------------------------------------------------------------------------------------------------------------------------------------------------------------------------------|--------|----------------|------|------|---------------------------------------------------------------------------------------------------------------------------------------------------------------------------------------------------------------------------------------------------------------------------------------------|-----------------------------------------------------------------------------------------------------------------------------------------------------------------------------------------------------------------------------------------------------------------------------------------------------------------------------------------------------------------------------------------------------------------------------------------------------------------------------------------------------------------------------------------------------------------------------------------------------------------------------------------------------|-----------------------------------------------------------------------------------------------------------------------------------------------------|----------------------------------------------------------------------------------------------------------------------------------------------------------------------------------------------------------------------|
| 211154_at | D32047 | THPO | Homo sapiens | 6-Oct-14 | Exemplar sequence | GenBank | gb:D32047.1 /DEF=Homo sapiens mRNA for thrombopoietin, complete cds. /FEA=mRNA /PROD=thrombopoietin /DB_XREF=gi:2351117 /UG=Hs.1166 thrombopoietin (myeloproliferative leukemia virus oncogene ligand, megakaryocyte growth and development factor) /FL=gb:D32047.1 | D32047 | thrombopoietin | THPO | 7066 | NM_000460 ///<br>NM_001177597 ///<br>NM_001177598 ///<br>NM_001289997 ///<br>NM_001289998 ///<br>NM_001290003 ///<br>NM_001290022 ///<br>NM_001290026 ///<br>NM_001290027 ///<br>NM_001290028 ///<br>NM_199228 ///<br>NM_199356 ///<br>XM_005247737 ///<br>XM_006713738 ///<br>XM_006713739 | 0001934 // positive regulation of protein phosphorylation // inferred from sequence or structural similarity ///<br>0007275 // multicellular organismal development // traceable author statement ///<br>0007596 // blood coagulation // traceable author statement ///<br>0008283 // cell proliferation // inferred from electronic annotation ///<br>0030099 // myeloid cell differentiation // inferred from electronic annotation ///<br>0030168 // platelet activation // traceable author statement ///<br>0038163 // thrombopoietin-mediated signaling pathway // inferred from sequence or structural similarity ///<br>0045654 // positive | 0005576 // extracellular region // inferred from electronic annotation ///<br>0005615 // extracellular space // inferred from electronic annotation | 0005125 // cytokine activity // inferred from electronic annotation ///<br>0005179 // hormone activity // inferred from electronic annotation ///<br>0008083 // growth factor activity // traceable author statement |
|-----------|--------|------|--------------|----------|-------------------|---------|---------------------------------------------------------------------------------------------------------------------------------------------------------------------------------------------------------------------------------------------------------------------|--------|----------------|------|------|---------------------------------------------------------------------------------------------------------------------------------------------------------------------------------------------------------------------------------------------------------------------------------------------|-----------------------------------------------------------------------------------------------------------------------------------------------------------------------------------------------------------------------------------------------------------------------------------------------------------------------------------------------------------------------------------------------------------------------------------------------------------------------------------------------------------------------------------------------------------------------------------------------------------------------------------------------------|-----------------------------------------------------------------------------------------------------------------------------------------------------|----------------------------------------------------------------------------------------------------------------------------------------------------------------------------------------------------------------------|

|             |        |      |              |          |                   |         |                                                                                                                                                                                                                                                                     |        |                |      |      |                                                                                                                                                                                                                                                                                             |                                                                                                                                                                                                                                                                                                                                                                                                                                                                                                                                                                                                                                                              |                                                                                                                                                     |                                                                                                                                                                                                                      |
|-------------|--------|------|--------------|----------|-------------------|---------|---------------------------------------------------------------------------------------------------------------------------------------------------------------------------------------------------------------------------------------------------------------------|--------|----------------|------|------|---------------------------------------------------------------------------------------------------------------------------------------------------------------------------------------------------------------------------------------------------------------------------------------------|--------------------------------------------------------------------------------------------------------------------------------------------------------------------------------------------------------------------------------------------------------------------------------------------------------------------------------------------------------------------------------------------------------------------------------------------------------------------------------------------------------------------------------------------------------------------------------------------------------------------------------------------------------------|-----------------------------------------------------------------------------------------------------------------------------------------------------|----------------------------------------------------------------------------------------------------------------------------------------------------------------------------------------------------------------------|
| 211155_s_at | D32047 | THPO | Homo sapiens | 6-Oct-14 | Exemplar sequence | GenBank | gb:D32047.1 /DEF=Homo sapiens mRNA for thrombopoietin, complete cds. /FEA=mRNA /PROD=thrombopoietin /DB_XREF=gi:2351117 /UG=Hs.1166 thrombopoietin (myeloproliferative leukemia virus oncogene ligand, megakaryocyte growth and development factor) /FL=gb:D32047.1 | D32047 | thrombopoietin | THPO | 7066 | NM_000460 ///<br>NM_001177597 ///<br>NM_001177598 ///<br>NM_001289997 ///<br>NM_001289998 ///<br>NM_001290003 ///<br>NM_001290022 ///<br>NM_001290026 ///<br>NM_001290027 ///<br>NM_001290028 ///<br>NM_199228 ///<br>NM_199356 ///<br>XM_005247737 ///<br>XM_006713738 ///<br>XM_006713739 | 0001934 // positive regulation of protein phosphorylation //<br>inferred from sequence or structural similarity ///<br>0007275 // multicellular organismal development // traceable author statement /// 0007596 //<br>blood coagulation // traceable author statement /// 0008283 //<br>cell proliferation //<br>inferred from electronic annotation /// 0030099 //<br>myeloid cell differentiation // inferred from electronic annotation /// 0030168 //<br>platelet activation // traceable author statement /// 0038163 //<br>thrombopoietin-mediated signaling pathway //<br>inferred from sequence or structural similarity ///<br>0045654 // positive | 0005576 // extracellular region // inferred from electronic annotation ///<br>0005615 // extracellular space // inferred from electronic annotation | 0005125 // cytokine activity // inferred from electronic annotation ///<br>0005179 // hormone activity // inferred from electronic annotation ///<br>0008083 // growth factor activity // traceable author statement |
|-------------|--------|------|--------------|----------|-------------------|---------|---------------------------------------------------------------------------------------------------------------------------------------------------------------------------------------------------------------------------------------------------------------------|--------|----------------|------|------|---------------------------------------------------------------------------------------------------------------------------------------------------------------------------------------------------------------------------------------------------------------------------------------------|--------------------------------------------------------------------------------------------------------------------------------------------------------------------------------------------------------------------------------------------------------------------------------------------------------------------------------------------------------------------------------------------------------------------------------------------------------------------------------------------------------------------------------------------------------------------------------------------------------------------------------------------------------------|-----------------------------------------------------------------------------------------------------------------------------------------------------|----------------------------------------------------------------------------------------------------------------------------------------------------------------------------------------------------------------------|

|             |          |      |              |          |                   |         |                                                                                                                                                                                                                     |          |                         |      |       |           |                                                                                                                                                                                                                                                                                                                                                                                                                                                                                                                                                                                                                              |                                                                                                                                                                                                                                                                                                                                                                                           |                                                                                                                                                                                                                                                                                                                                                                                                                                                                                                                                                                                                                                                                                                                                    |
|-------------|----------|------|--------------|----------|-------------------|---------|---------------------------------------------------------------------------------------------------------------------------------------------------------------------------------------------------------------------|----------|-------------------------|------|-------|-----------|------------------------------------------------------------------------------------------------------------------------------------------------------------------------------------------------------------------------------------------------------------------------------------------------------------------------------------------------------------------------------------------------------------------------------------------------------------------------------------------------------------------------------------------------------------------------------------------------------------------------------|-------------------------------------------------------------------------------------------------------------------------------------------------------------------------------------------------------------------------------------------------------------------------------------------------------------------------------------------------------------------------------------------|------------------------------------------------------------------------------------------------------------------------------------------------------------------------------------------------------------------------------------------------------------------------------------------------------------------------------------------------------------------------------------------------------------------------------------------------------------------------------------------------------------------------------------------------------------------------------------------------------------------------------------------------------------------------------------------------------------------------------------|
| 211186_s_at | BC002695 | AAK1 | Homo sapiens | 6-Oct-14 | Exemplar sequence | GenBank | gb:BC002695.1 /DEF=Homo sapiens, Similar to KIAA1048 protein, clone MGC:3535, mRNA, complete cds. /FEA=mRNA /PROD=Similar to KIAA1048 protein /DB_XREF=gi:12803718 /UG=Hs.135941 KIAA1048 protein /FL=gb:BC002695.1 | BC002695 | AP2 associated kinase 1 | AAK1 | 22848 | NM_014911 | 0006468 // protein phosphorylation // inferred from direct assay /// 0006897 // endocytosis // inferred from electronic annotation /// 0016310 // phosphorylation // inferred from electronic annotation /// 0032880 // regulation of protein localization // inferred from direct assay /// 0045747 // positive regulation of Notch signaling pathway // inferred from direct assay /// 0046777 // protein autophosphorylation // inferred from sequence or structural similarity /// 0050821 // protein stabilization // inferred from direct assay /// 2000369 // regulation of clathrin-mediated endocytosis // inferred | 0005886 // plasma membrane // inferred from electronic annotation /// 0005905 // coated pit // inferred from electronic annotation /// 0016020 // membrane // inferred from electronic annotation /// 0019897 // extrinsic component of plasma membrane // inferred from sequence or structural similarity /// 0030136 // clathrin-coated vesicle // inferred from sequence or structural | 0000166 // nucleotide binding // inferred from electronic annotation /// 0004672 // protein kinase activity // inferred from electronic annotation /// 0004674 // protein serine/threonine kinase activity // inferred from sequence or structural similarity /// 0004713 // protein tyrosine kinase activity // inferred from electronic annotation /// 0005112 // Notch binding // inferred from direct assay /// 0005515 // protein binding // inferred from physical interaction /// 0005524 // ATP binding // inferred from electronic annotation /// 0016301 // kinase activity // inferred from electronic annotation /// 0016740 // transferase activity // inferred from electronic annotation /// 0016772 // transferase |
|-------------|----------|------|--------------|----------|-------------------|---------|---------------------------------------------------------------------------------------------------------------------------------------------------------------------------------------------------------------------|----------|-------------------------|------|-------|-----------|------------------------------------------------------------------------------------------------------------------------------------------------------------------------------------------------------------------------------------------------------------------------------------------------------------------------------------------------------------------------------------------------------------------------------------------------------------------------------------------------------------------------------------------------------------------------------------------------------------------------------|-------------------------------------------------------------------------------------------------------------------------------------------------------------------------------------------------------------------------------------------------------------------------------------------------------------------------------------------------------------------------------------------|------------------------------------------------------------------------------------------------------------------------------------------------------------------------------------------------------------------------------------------------------------------------------------------------------------------------------------------------------------------------------------------------------------------------------------------------------------------------------------------------------------------------------------------------------------------------------------------------------------------------------------------------------------------------------------------------------------------------------------|



|             |          |       |              |          |                   |         |                                                                                                                                                                                                      |          |             |       |      |                                                              |                                                                                                                                                                                                                                                                                                                                                                                                                                                                                                                                 |                                                                                                                                                                                                                                                                                                                                                                                                           |                                                                                                                                                              |
|-------------|----------|-------|--------------|----------|-------------------|---------|------------------------------------------------------------------------------------------------------------------------------------------------------------------------------------------------------|----------|-------------|-------|------|--------------------------------------------------------------|---------------------------------------------------------------------------------------------------------------------------------------------------------------------------------------------------------------------------------------------------------------------------------------------------------------------------------------------------------------------------------------------------------------------------------------------------------------------------------------------------------------------------------|-----------------------------------------------------------------------------------------------------------------------------------------------------------------------------------------------------------------------------------------------------------------------------------------------------------------------------------------------------------------------------------------------------------|--------------------------------------------------------------------------------------------------------------------------------------------------------------|
| 211299_s_at | BC003683 | FLOT2 | Homo sapiens | 6-Oct-14 | Exemplar sequence | GenBank | gb:BC003683.1 /DEF=Homo sapiens, Similar to flotillin 2, clone MGC:5052, mRNA, complete cds. /FEA=mRNA /PROD=Similar to flotillin 2 /DB_XREF=gi:13277549 /UG=Hs.184488 flotillin 2 /FL=gb:BC003683.1 | BC003683 | flotillin 2 | FLOT2 | 2319 | NM_004475 /// XM_005257950 /// XM_005257952 /// XM_005257953 | 0007155 // cell adhesion // inferred from electronic annotation /// 0008544 // epidermis development // traceable author statement /// 0010629 // negative regulation of gene expression // inferred from mutant phenotype /// 0050821 // protein stabilization // inferred from mutant phenotype /// 0090002 // establishment of protein localization to plasma membrane // inferred from mutant phenotype /// 1902992 // negative regulation of amyloid precursor protein catabolic process // inferred from mutant phenotype | 0002080 // acrosomal membrane // inferred from electronic annotation /// 0005768 // endosome // inferred from direct assay /// 0005886 // plasma membrane // non-traceable author statement /// 0005901 // caveola // inferred from direct assay /// 0009986 // cell surface // inferred from direct assay /// 0016020 // membrane // inferred from direct assay /// 0016020 // membrane // inferred from | 0005515 // protein binding // inferred from physical interaction /// 0035255 // ionotropic glutamate receptor binding // inferred from electronic annotation |
|-------------|----------|-------|--------------|----------|-------------------|---------|------------------------------------------------------------------------------------------------------------------------------------------------------------------------------------------------------|----------|-------------|-------|------|--------------------------------------------------------------|---------------------------------------------------------------------------------------------------------------------------------------------------------------------------------------------------------------------------------------------------------------------------------------------------------------------------------------------------------------------------------------------------------------------------------------------------------------------------------------------------------------------------------|-----------------------------------------------------------------------------------------------------------------------------------------------------------------------------------------------------------------------------------------------------------------------------------------------------------------------------------------------------------------------------------------------------------|--------------------------------------------------------------------------------------------------------------------------------------------------------------|

|             |        |      |              |          |                   |         |                                                                                                                                                                              |        |                                  |      |      |                                                                                                                                                                    |                                                          |                                                                                                                                                                                                                                                                                                                                                                                        |                                                               |
|-------------|--------|------|--------------|----------|-------------------|---------|------------------------------------------------------------------------------------------------------------------------------------------------------------------------------|--------|----------------------------------|------|------|--------------------------------------------------------------------------------------------------------------------------------------------------------------------|----------------------------------------------------------|----------------------------------------------------------------------------------------------------------------------------------------------------------------------------------------------------------------------------------------------------------------------------------------------------------------------------------------------------------------------------------------|---------------------------------------------------------------|
| 211305_x_at | U56236 | FCAR | Homo sapiens | 6-Oct-14 | Exemplar sequence | GenBank | gb:U56236.1 /DEF=Human Fc alpha receptor b mRNA, complete cds. /FEA=mRNA /PROD=Fcalpha Rb /DB_XREF=gi:1326228 /UG=Hs.193122 Fc fragment of IgA, receptor for /FL=gb:U56236.1 | U56236 | Fc fragment of IgA, receptor for | FCAR | 2204 | NM_002000 ///<br>NM_133269 ///<br>NM_133271 ///<br>NM_133272 ///<br>NM_133273 ///<br>NM_133274 ///<br>NM_133277 ///<br>NM_133278 ///<br>NM_133279 ///<br>NM_133280 | 0006955 // immune response // traceable author statement | 0005576 // extracellular region // inferred from electronic annotation ///<br>0005886 // plasma membrane // inferred from direct assay ///<br>0005887 // integral component of plasma membrane // traceable author statement ///<br>0016020 // membrane // inferred from electronic annotation ///<br>0016021 // integral component of membrane // inferred from electronic annotation | 0019862 // IgA binding // inferred from electronic annotation |
|-------------|--------|------|--------------|----------|-------------------|---------|------------------------------------------------------------------------------------------------------------------------------------------------------------------------------|--------|----------------------------------|------|------|--------------------------------------------------------------------------------------------------------------------------------------------------------------------|----------------------------------------------------------|----------------------------------------------------------------------------------------------------------------------------------------------------------------------------------------------------------------------------------------------------------------------------------------------------------------------------------------------------------------------------------------|---------------------------------------------------------------|

|             |        |      |              |          |                   |         |                                                                                                                                                                                             |        |                                  |      |      |                                                                                                                                                                    |                                                          |                                                                                                                                                                                                                                                                                                                                                                                        |                                                               |
|-------------|--------|------|--------------|----------|-------------------|---------|---------------------------------------------------------------------------------------------------------------------------------------------------------------------------------------------|--------|----------------------------------|------|------|--------------------------------------------------------------------------------------------------------------------------------------------------------------------|----------------------------------------------------------|----------------------------------------------------------------------------------------------------------------------------------------------------------------------------------------------------------------------------------------------------------------------------------------------------------------------------------------------------------------------------------------|---------------------------------------------------------------|
| 211306_s_at | U56237 | FCAR | Homo sapiens | 6-Oct-14 | Exemplar sequence | GenBank | gb:U56237.1 /DEF=Human Fc alpha receptor b deltaS2 mRNA, complete cds. /FEA=mRNA /PROD=Fcalpha RbdeltaS2 /DB_XREF=gi:1326230 /UG=Hs.193122 Fc fragment of IgA, receptor for /FL=gb:U56237.1 | U56237 | Fc fragment of IgA, receptor for | FCAR | 2204 | NM_002000 ///<br>NM_133269 ///<br>NM_133271 ///<br>NM_133272 ///<br>NM_133273 ///<br>NM_133274 ///<br>NM_133277 ///<br>NM_133278 ///<br>NM_133279 ///<br>NM_133280 | 0006955 // immune response // traceable author statement | 0005576 // extracellular region // inferred from electronic annotation ///<br>0005886 // plasma membrane // inferred from direct assay ///<br>0005887 // integral component of plasma membrane // traceable author statement ///<br>0016020 // membrane // inferred from electronic annotation ///<br>0016021 // integral component of membrane // inferred from electronic annotation | 0019862 // IgA binding // inferred from electronic annotation |
|-------------|--------|------|--------------|----------|-------------------|---------|---------------------------------------------------------------------------------------------------------------------------------------------------------------------------------------------|--------|----------------------------------|------|------|--------------------------------------------------------------------------------------------------------------------------------------------------------------------|----------------------------------------------------------|----------------------------------------------------------------------------------------------------------------------------------------------------------------------------------------------------------------------------------------------------------------------------------------------------------------------------------------------------------------------------------------|---------------------------------------------------------------|

|             |        |      |              |          |                   |         |                                                                                                                                                                                                                                                           |        |                                  |      |      |                                                                                                                                                                    |                                                          |                                                                                                                                                                                                                                                                                                                                                                                        |                                                               |
|-------------|--------|------|--------------|----------|-------------------|---------|-----------------------------------------------------------------------------------------------------------------------------------------------------------------------------------------------------------------------------------------------------------|--------|----------------------------------|------|------|--------------------------------------------------------------------------------------------------------------------------------------------------------------------|----------------------------------------------------------|----------------------------------------------------------------------------------------------------------------------------------------------------------------------------------------------------------------------------------------------------------------------------------------------------------------------------------------------------------------------------------------|---------------------------------------------------------------|
| 211307_s_at | U43677 | FCAR | Homo sapiens | 6-Oct-14 | Exemplar sequence | GenBank | gb:U43677.1 /DEF=Human Fc alpha receptor, splice variant Fc alpha R a.3 (CD89) mRNA, complete cds. /FEA=mRNA /GEN=CD89 /PROD=Fc alpha receptor /DB_XREF=gi:1439557 /UG=Hs.193122 Fc fragment of IgA, receptor for /FL=gb:U43677.1 gb:D87854.1 gb:D87856.1 | U43677 | Fc fragment of IgA, receptor for | FCAR | 2204 | NM_002000 ///<br>NM_133269 ///<br>NM_133271 ///<br>NM_133272 ///<br>NM_133273 ///<br>NM_133274 ///<br>NM_133277 ///<br>NM_133278 ///<br>NM_133279 ///<br>NM_133280 | 0006955 // immune response // traceable author statement | 0005576 // extracellular region // inferred from electronic annotation ///<br>0005886 // plasma membrane // inferred from direct assay ///<br>0005887 // integral component of plasma membrane // traceable author statement ///<br>0016020 // membrane // inferred from electronic annotation ///<br>0016021 // integral component of membrane // inferred from electronic annotation | 0019862 // IgA binding // inferred from electronic annotation |
|-------------|--------|------|--------------|----------|-------------------|---------|-----------------------------------------------------------------------------------------------------------------------------------------------------------------------------------------------------------------------------------------------------------|--------|----------------------------------|------|------|--------------------------------------------------------------------------------------------------------------------------------------------------------------------|----------------------------------------------------------|----------------------------------------------------------------------------------------------------------------------------------------------------------------------------------------------------------------------------------------------------------------------------------------------------------------------------------------------------------------------------------------|---------------------------------------------------------------|

|             |          |         |              |          |                   |         |                                                                                                                                                                                                                                                      |          |                                                                     |         |       |                                                           |                                                                                                                                                                                                                                                                                                                                                                                                                                                                                                                                                                                                                                               |                                                                                                                                                 |                                                                                                                                                                                                                                                                                                             |
|-------------|----------|---------|--------------|----------|-------------------|---------|------------------------------------------------------------------------------------------------------------------------------------------------------------------------------------------------------------------------------------------------------|----------|---------------------------------------------------------------------|---------|-------|-----------------------------------------------------------|-----------------------------------------------------------------------------------------------------------------------------------------------------------------------------------------------------------------------------------------------------------------------------------------------------------------------------------------------------------------------------------------------------------------------------------------------------------------------------------------------------------------------------------------------------------------------------------------------------------------------------------------------|-------------------------------------------------------------------------------------------------------------------------------------------------|-------------------------------------------------------------------------------------------------------------------------------------------------------------------------------------------------------------------------------------------------------------------------------------------------------------|
| 211385_x_at | U28169   | SULT1A2 | Homo sapiens | 6-Oct-14 | Exemplar sequence | GenBank | gb:U28169.1 /DEF=Human clone hast4v aryl sulfotransferase mRNA, complete cds. /FEA=mRNA /PROD=aryl sulfotransferase /DB_XREF=gi:881502 /UG=Hs.272462 sulfotransferase family, cytosolic, 1A, phenol-preferring, member 2 /FL=gb:U28169.1 gb:U28170.1 | U28169   | sulfotransferase family, cytosolic, 1A, phenol-preferring, member 2 | SULT1A2 | 6799  | NM_001054 /// NM_177528 /// XM_006721076 /// XM_006721077 | 0006584 // catecholamine metabolic process // inferred from electronic annotation /// 0006629 // lipid metabolic process // inferred from electronic annotation /// 0006805 // xenobiotic metabolic process // inferred from direct assay /// 0006805 // xenobiotic metabolic process // traceable author statement /// 0008152 // metabolic process // inferred from electronic annotation /// 0008202 // steroid metabolic process // inferred from electronic annotation /// 0009309 // amine biosynthetic process // traceable author statement /// 0018958 // phenol-containing compound metabolic process // inferred from direct assay | 0005737 // cytoplasm // inferred from electronic annotation /// 0005829 // cytosol // traceable author statement                                | 0004062 // aryl sulfotransferase activity // inferred from direct assay /// 0008146 // sulfotransferase activity // traceable author statement /// 0016740 // transferase activity // inferred from electronic annotation /// 0047894 // flavonol 3-sulfotransferase activity // inferred from direct assay |
| 211596_s_at | AB050468 | LRIG1   | Homo sapiens | 6-Oct-14 | Exemplar sequence | GenBank | gb:AB050468.1 /DEF=Homo sapiens mRNA for membrane glycoprotein LIG-1, complete cds. /FEA=mRNA /GEN=lig-1 /PROD=membrane glycoprotein LIG-1 /DB_XREF=gi:13537354 /FL=gb:AB050468.1                                                                    | AB050468 | leucine-rich repeats and immunoglobulin-like domains 1              | LRIG1   | 26018 | NM_015541                                                 |                                                                                                                                                                                                                                                                                                                                                                                                                                                                                                                                                                                                                                               | 0016020 // membrane // inferred from electronic annotation /// 0016021 // integral component of membrane // inferred from electronic annotation | 0005515 // protein binding // inferred from electronic annotation                                                                                                                                                                                                                                           |

|             |        |       |              |          |                   |         |                                                                                                               |        |                 |       |      |           |                                                                                                                                                                                                                                                                                                                                                                                                                                                                                                                                                                                                                                                                               |                                                                                                                                                                                                                                                                                                                                                                                                           |                                                                                                                                                                                                                                                                                                                                                                                                                                                                      |
|-------------|--------|-------|--------------|----------|-------------------|---------|---------------------------------------------------------------------------------------------------------------|--------|-----------------|-------|------|-----------|-------------------------------------------------------------------------------------------------------------------------------------------------------------------------------------------------------------------------------------------------------------------------------------------------------------------------------------------------------------------------------------------------------------------------------------------------------------------------------------------------------------------------------------------------------------------------------------------------------------------------------------------------------------------------------|-----------------------------------------------------------------------------------------------------------------------------------------------------------------------------------------------------------------------------------------------------------------------------------------------------------------------------------------------------------------------------------------------------------|----------------------------------------------------------------------------------------------------------------------------------------------------------------------------------------------------------------------------------------------------------------------------------------------------------------------------------------------------------------------------------------------------------------------------------------------------------------------|
| 211651_s_at | M20206 | LAMB1 | Homo sapiens | 6-Oct-14 | Exemplar sequence | GenBank | gb:M20206.1 /DEF=Human laminin B1 mRNA, complete cds. /FEA=mRNA /GEN=LAMB1 /DB_XREF=gi:186914 /FL=gb:M20206.1 | M20206 | laminin, beta 1 | LAMB1 | 3912 | NM_002291 | 0007155 // cell adhesion // traceable author statement /// 0007162 // negative regulation of cell adhesion // inferred from electronic annotation /// 0007411 // axon guidance // traceable author statement /// 0007566 // embryo implantation // inferred from electronic annotation /// 0016192 // vesicle-mediated transport // inferred from electronic annotation /// 0016477 // cell migration // inferred from electronic annotation /// 0021812 // neuronal-glia interaction involved in cerebral cortex radial glia guided migration // inferred from mutant phenotype /// 0022617 // extracellular matrix disassembly // traceable author statement /// 0030198 // | 0005576 // extracellular region // traceable author statement /// 0005578 // proteinaceous extracellular matrix // inferred from electronic annotation /// 0005604 // basement membrane // inferred from direct assay /// 0005604 // basement membrane // traceable author statement /// 0005605 // basal lamina // inferred from electronic annotation /// 0005606 // laminin-1 complex // inferred from | 0005178 // integrin binding // inferred from electronic annotation /// 0005198 // structural molecule activity // non-traceable author statement /// 0005201 // extracellular matrix structural constituent // inferred from direct assay /// 0005515 // protein binding // inferred from electronic annotation /// 0019899 // enzyme binding // inferred from electronic annotation /// 0043208 // glycosphingolipid binding // inferred from electronic annotation |
|-------------|--------|-------|--------------|----------|-------------------|---------|---------------------------------------------------------------------------------------------------------------|--------|-----------------|-------|------|-----------|-------------------------------------------------------------------------------------------------------------------------------------------------------------------------------------------------------------------------------------------------------------------------------------------------------------------------------------------------------------------------------------------------------------------------------------------------------------------------------------------------------------------------------------------------------------------------------------------------------------------------------------------------------------------------------|-----------------------------------------------------------------------------------------------------------------------------------------------------------------------------------------------------------------------------------------------------------------------------------------------------------------------------------------------------------------------------------------------------------|----------------------------------------------------------------------------------------------------------------------------------------------------------------------------------------------------------------------------------------------------------------------------------------------------------------------------------------------------------------------------------------------------------------------------------------------------------------------|

|             |        |      |              |          |                   |         |                                                                                                                                                                                       |        |                                  |      |      |                                                                                                                                                                    |                                                          |                                                                                                                                                                                                                                                                                                                                                                                        |                                                               |
|-------------|--------|------|--------------|----------|-------------------|---------|---------------------------------------------------------------------------------------------------------------------------------------------------------------------------------------|--------|----------------------------------|------|------|--------------------------------------------------------------------------------------------------------------------------------------------------------------------|----------------------------------------------------------|----------------------------------------------------------------------------------------------------------------------------------------------------------------------------------------------------------------------------------------------------------------------------------------------------------------------------------------------------------------------------------------|---------------------------------------------------------------|
| 211816_x_at | D87858 | FCAR | Homo sapiens | 6-Oct-14 | Exemplar sequence | GenBank | gb:D87858.1 /DEF=Homo sapiens mRNA for CD89_U04, complete cds. /FEA=CDS /PROD=CD89_U04 /DB_XREF=gi:1561545 /UG=Hs.193122 Fc fragment of IgA, receptor for /FL=gb:D87858.1 gb:D87860.1 | D87858 | Fc fragment of IgA, receptor for | FCAR | 2204 | NM_002000 ///<br>NM_133269 ///<br>NM_133271 ///<br>NM_133272 ///<br>NM_133273 ///<br>NM_133274 ///<br>NM_133277 ///<br>NM_133278 ///<br>NM_133279 ///<br>NM_133280 | 0006955 // immune response // traceable author statement | 0005576 // extracellular region // inferred from electronic annotation ///<br>0005886 // plasma membrane // inferred from direct assay ///<br>0005887 // integral component of plasma membrane // traceable author statement ///<br>0016020 // membrane // inferred from electronic annotation ///<br>0016021 // integral component of membrane // inferred from electronic annotation | 0019862 // IgA binding // inferred from electronic annotation |
|-------------|--------|------|--------------|----------|-------------------|---------|---------------------------------------------------------------------------------------------------------------------------------------------------------------------------------------|--------|----------------------------------|------|------|--------------------------------------------------------------------------------------------------------------------------------------------------------------------|----------------------------------------------------------|----------------------------------------------------------------------------------------------------------------------------------------------------------------------------------------------------------------------------------------------------------------------------------------------------------------------------------------------------------------------------------------|---------------------------------------------------------------|

|             |        |      |              |          |                   |         |                                                                                                                                                                                                                                                                                                |        |                |      |      |                                                                                                                                                                                                                                                                                             |                                                                                                                                                                                                                                                                                                                                                                                                                                                                                                                                                                                                                                                              |                                                                                                                                                     |                                                                                                                                                                                                                      |
|-------------|--------|------|--------------|----------|-------------------|---------|------------------------------------------------------------------------------------------------------------------------------------------------------------------------------------------------------------------------------------------------------------------------------------------------|--------|----------------|------|------|---------------------------------------------------------------------------------------------------------------------------------------------------------------------------------------------------------------------------------------------------------------------------------------------|--------------------------------------------------------------------------------------------------------------------------------------------------------------------------------------------------------------------------------------------------------------------------------------------------------------------------------------------------------------------------------------------------------------------------------------------------------------------------------------------------------------------------------------------------------------------------------------------------------------------------------------------------------------|-----------------------------------------------------------------------------------------------------------------------------------------------------|----------------------------------------------------------------------------------------------------------------------------------------------------------------------------------------------------------------------|
| 211831_s_at | U59495 | THPO | Homo sapiens | 6-Oct-14 | Exemplar sequence | GenBank | gb:U59495.1 /DEF=Human truncated thrombopoietin (thTPO) mRNA, complete cds. /FEA=CDS /GEN=thTPO /PROD=truncated thrombopoietin /DB_XREF=gi:1401249 /UG=Hs.1166 thrombopoietin (myeloproliferative leukemia virus oncogene ligand, megakaryocyte growth and development factor) /FL=gb:U59495.1 | U59495 | thrombopoietin | THPO | 7066 | NM_000460 ///<br>NM_001177597 ///<br>NM_001177598 ///<br>NM_001289997 ///<br>NM_001289998 ///<br>NM_001290003 ///<br>NM_001290022 ///<br>NM_001290026 ///<br>NM_001290027 ///<br>NM_001290028 ///<br>NM_199228 ///<br>NM_199356 ///<br>XM_005247737 ///<br>XM_006713738 ///<br>XM_006713739 | 0001934 // positive regulation of protein phosphorylation //<br>inferred from sequence or structural similarity ///<br>0007275 // multicellular organismal development // traceable author statement /// 0007596 //<br>blood coagulation // traceable author statement /// 0008283 //<br>cell proliferation //<br>inferred from electronic annotation /// 0030099 //<br>myeloid cell differentiation // inferred from electronic annotation /// 0030168 //<br>platelet activation // traceable author statement /// 0038163 //<br>thrombopoietin-mediated signaling pathway //<br>inferred from sequence or structural similarity ///<br>0045654 // positive | 0005576 // extracellular region // inferred from electronic annotation ///<br>0005615 // extracellular space // inferred from electronic annotation | 0005125 // cytokine activity // inferred from electronic annotation ///<br>0005179 // hormone activity // inferred from electronic annotation ///<br>0008083 // growth factor activity // traceable author statement |
|-------------|--------|------|--------------|----------|-------------------|---------|------------------------------------------------------------------------------------------------------------------------------------------------------------------------------------------------------------------------------------------------------------------------------------------------|--------|----------------|------|------|---------------------------------------------------------------------------------------------------------------------------------------------------------------------------------------------------------------------------------------------------------------------------------------------|--------------------------------------------------------------------------------------------------------------------------------------------------------------------------------------------------------------------------------------------------------------------------------------------------------------------------------------------------------------------------------------------------------------------------------------------------------------------------------------------------------------------------------------------------------------------------------------------------------------------------------------------------------------|-----------------------------------------------------------------------------------------------------------------------------------------------------|----------------------------------------------------------------------------------------------------------------------------------------------------------------------------------------------------------------------|



|             |          |       |              |          |                   |         |                                                                                                                                                             |          |                                    |      |                            |                                                                                                                                                                                                                                                                                                                                                                                                                                                                                                                                                                                                                                                    |                                                                                                                                                                                                                                                                                                                                                                                               |                                                                                                                                                                                                                                                                                                                                                                                                                                                                                                                                                                                                                                                                                                                                             |
|-------------|----------|-------|--------------|----------|-------------------|---------|-------------------------------------------------------------------------------------------------------------------------------------------------------------|----------|------------------------------------|------|----------------------------|----------------------------------------------------------------------------------------------------------------------------------------------------------------------------------------------------------------------------------------------------------------------------------------------------------------------------------------------------------------------------------------------------------------------------------------------------------------------------------------------------------------------------------------------------------------------------------------------------------------------------------------------------|-----------------------------------------------------------------------------------------------------------------------------------------------------------------------------------------------------------------------------------------------------------------------------------------------------------------------------------------------------------------------------------------------|---------------------------------------------------------------------------------------------------------------------------------------------------------------------------------------------------------------------------------------------------------------------------------------------------------------------------------------------------------------------------------------------------------------------------------------------------------------------------------------------------------------------------------------------------------------------------------------------------------------------------------------------------------------------------------------------------------------------------------------------|
| 211919_s_at | AF348491 | CXCR4 | Homo sapiens | 6-Oct-14 | Exemplar sequence | GenBank | gb:AF348491.1 /DEF=Homo sapiens chemokine receptor CXCR4 mRNA, complete cds. /FEA=CDS /PROD=chemokine receptor CXCR4 /DB_XREF=gi:13549089 /FL=gb:AF348491.1 | AF348491 | chemokine (C-X-C motif) receptor 4 | 7852 | NM_001008540 /// NM_003467 | 0000187 // activation of MAPK activity // traceable author statement /// 0001569 // patterning of blood vessels // inferred from electronic annotation /// 0001666 // response to hypoxia // inferred from expression pattern /// 0001667 // amoeboid cell migration // inferred from electronic annotation /// 0001764 // neuron migration // inferred from electronic annotation /// 0002407 // dendritic cell chemotaxis // traceable author statement /// 0006915 // apoptotic process // traceable author statement /// 0006935 // chemotaxis // inferred from electronic annotation /// 0006954 // inflammatory response // traceable author | 0005737 // cytoplasm // traceable author statement /// 0005764 // lysosome // inferred from direct assay /// 0005768 // endosome // inferred from electronic annotation /// 0005769 // early endosome // inferred from direct assay /// 0005770 // late endosome // inferred from direct assay /// 0005886 // plasma membrane // inferred from direct assay /// 0005886 // plasma membrane // | 0001618 // virus receptor activity // inferred from electronic annotation /// 0003779 // actin binding // inferred from direct assay /// 0004871 // signal transducer activity // inferred from electronic annotation /// 0004930 // G-protein coupled receptor activity // traceable author statement /// 0004950 // chemokine receptor activity // inferred from electronic annotation /// 0005515 // protein binding // inferred from physical interaction /// 0015026 // coreceptor activity // traceable author statement /// 0016494 // C-X-C chemokine receptor activity // non-traceable author statement /// 0019955 // cytokine binding // inferred from electronic annotation /// 0031625 // ubiquitin protein ligase binding // |
|-------------|----------|-------|--------------|----------|-------------------|---------|-------------------------------------------------------------------------------------------------------------------------------------------------------------|----------|------------------------------------|------|----------------------------|----------------------------------------------------------------------------------------------------------------------------------------------------------------------------------------------------------------------------------------------------------------------------------------------------------------------------------------------------------------------------------------------------------------------------------------------------------------------------------------------------------------------------------------------------------------------------------------------------------------------------------------------------|-----------------------------------------------------------------------------------------------------------------------------------------------------------------------------------------------------------------------------------------------------------------------------------------------------------------------------------------------------------------------------------------------|---------------------------------------------------------------------------------------------------------------------------------------------------------------------------------------------------------------------------------------------------------------------------------------------------------------------------------------------------------------------------------------------------------------------------------------------------------------------------------------------------------------------------------------------------------------------------------------------------------------------------------------------------------------------------------------------------------------------------------------------|

|             |          |        |              |          |                    |         |                                                                                                                                                                                                                                                                                                              |          |                             |        |      |                                                                                                                                                                                                                                                                            |  |                                                                                                                                                                                                                                                                       |                                                                                                                                      |
|-------------|----------|--------|--------------|----------|--------------------|---------|--------------------------------------------------------------------------------------------------------------------------------------------------------------------------------------------------------------------------------------------------------------------------------------------------------------|----------|-----------------------------|--------|------|----------------------------------------------------------------------------------------------------------------------------------------------------------------------------------------------------------------------------------------------------------------------------|--|-----------------------------------------------------------------------------------------------------------------------------------------------------------------------------------------------------------------------------------------------------------------------|--------------------------------------------------------------------------------------------------------------------------------------|
| 212081_x_at | AF129756 | PRRC2A | Homo sapiens | 6-Oct-14 | Consensus sequence | GenBank | Consensus includes gb:AF129756 /DEF=Homo sapiens MSH55 gene, partial cds; and CLIC1, DDAH, G6b, G6c, G5b, G6d, G6e, G6f, BAT5, G5b, CSK2B, BAT4, G4, Apo M, BAT3, BAT2, AIF-1, 1C7, LST-1, LTB, TNF, and LTA genes, complete cds /FEA=mRNA_20 /DB_XREF=gi:4337095 /UG=Hs.25911 HLA-B associated transcript-2 | AF129756 | proline-rich coiled-coil 2A | PRRC2A | 7916 | NM_004638 ///<br>NM_080686 ///<br>XM_006715191 ///<br>XM_006725507 ///<br>XM_006725508 ///<br>XM_006725723 ///<br>XM_006725724 ///<br>XM_006725833 ///<br>XM_006725834 ///<br>XM_006725922 ///<br>XM_006726023 ///<br>XM_006726024 ///<br>XM_006726111 ///<br>XM_006726112 |  | 0005634 // nucleus // inferred from electronic annotation ///<br>0005737 // cytoplasm // inferred from electronic annotation ///<br>0016020 // membrane // inferred from direct assay ///<br>0070062 // extracellular vesicular exosome // inferred from direct assay | 0005515 // protein binding // inferred from physical interaction ///<br>0044822 // poly(A) RNA binding // inferred from direct assay |
|-------------|----------|--------|--------------|----------|--------------------|---------|--------------------------------------------------------------------------------------------------------------------------------------------------------------------------------------------------------------------------------------------------------------------------------------------------------------|----------|-----------------------------|--------|------|----------------------------------------------------------------------------------------------------------------------------------------------------------------------------------------------------------------------------------------------------------------------------|--|-----------------------------------------------------------------------------------------------------------------------------------------------------------------------------------------------------------------------------------------------------------------------|--------------------------------------------------------------------------------------------------------------------------------------|

|             |           |      |              |          |                    |         |                                                                                                                                                                                                          |           |                    |      |      |           |                                                                                                                                                                                                                                                                                                                                                                                                                                                                                                                                                                                                                       |                                                                                                                                                                                                                                                                                                          |                                                                                                                                                                                                                                                                                                                                                     |
|-------------|-----------|------|--------------|----------|--------------------|---------|----------------------------------------------------------------------------------------------------------------------------------------------------------------------------------------------------------|-----------|--------------------|------|------|-----------|-----------------------------------------------------------------------------------------------------------------------------------------------------------------------------------------------------------------------------------------------------------------------------------------------------------------------------------------------------------------------------------------------------------------------------------------------------------------------------------------------------------------------------------------------------------------------------------------------------------------------|----------------------------------------------------------------------------------------------------------------------------------------------------------------------------------------------------------------------------------------------------------------------------------------------------------|-----------------------------------------------------------------------------------------------------------------------------------------------------------------------------------------------------------------------------------------------------------------------------------------------------------------------------------------------------|
| 212185_x_at | NM_005953 | MT2A | Homo sapiens | 6-Oct-14 | Consensus sequence | GenBank | Consensus includes gb:NM_005953.1 /DEF=Homo sapiens metallothionein 2A (MT2A), mRNA. /FEA=CDS /GEN=MT2A /PROD=metallothionein 2A /DB_XREF=gi:5174763 /UG=Hs.118786 metallothionein 2A /FL=gb:NM_005953.1 | NM_005953 | metallothionein 2A | MT2A | 4502 | NM_005953 | 0006878 // cellular copper ion homeostasis // traceable author statement /// 0019221 // cytokine-mediated signaling pathway // traceable author statement /// 0035690 // cellular response to drug // inferred from direct assay /// 0036016 // cellular response to interleukin-3 // inferred from expression pattern /// 0036018 // cellular response to erythropoietin // inferred from expression pattern /// 0045926 // negative regulation of growth // inferred from sequence or structural similarity /// 0060333 // interferon-gamma-mediated signaling pathway // traceable author statement /// 0071294 // | 0005634 // nucleus // inferred from sequence or structural similarity /// 0005737 // cytoplasm // inferred from sequence or structural similarity /// 0005829 // cytosol // traceable author statement /// 0048471 // perinuclear region of cytoplasm // inferred from sequence or structural similarity | 0005515 // protein binding // inferred from physical interaction /// 0008144 // drug binding // inferred from direct assay /// 0008270 // zinc ion binding // inferred from direct assay /// 0008270 // zinc ion binding // inferred from sequence or structural similarity /// 0046872 // metal ion binding // inferred from electronic annotation |
|-------------|-----------|------|--------------|----------|--------------------|---------|----------------------------------------------------------------------------------------------------------------------------------------------------------------------------------------------------------|-----------|--------------------|------|------|-----------|-----------------------------------------------------------------------------------------------------------------------------------------------------------------------------------------------------------------------------------------------------------------------------------------------------------------------------------------------------------------------------------------------------------------------------------------------------------------------------------------------------------------------------------------------------------------------------------------------------------------------|----------------------------------------------------------------------------------------------------------------------------------------------------------------------------------------------------------------------------------------------------------------------------------------------------------|-----------------------------------------------------------------------------------------------------------------------------------------------------------------------------------------------------------------------------------------------------------------------------------------------------------------------------------------------------|

|             |        |     |              |          |                    |         |                                                                                                                        |        |                                     |               |               |                                                                                                                                                                                                                                                     |                                                                                                                                                                                                                                                                                                                                                                                                                                                                                                                                                                                                                     |                                                                                                                                                                                                                                                                                                                                                                                           |                                                                                                                                                                                                                                                                                                                                                                                                                                                                                                                                                                                                                                                                                                                                                                       |
|-------------|--------|-----|--------------|----------|--------------------|---------|------------------------------------------------------------------------------------------------------------------------|--------|-------------------------------------|---------------|---------------|-----------------------------------------------------------------------------------------------------------------------------------------------------------------------------------------------------------------------------------------------------|---------------------------------------------------------------------------------------------------------------------------------------------------------------------------------------------------------------------------------------------------------------------------------------------------------------------------------------------------------------------------------------------------------------------------------------------------------------------------------------------------------------------------------------------------------------------------------------------------------------------|-------------------------------------------------------------------------------------------------------------------------------------------------------------------------------------------------------------------------------------------------------------------------------------------------------------------------------------------------------------------------------------------|-----------------------------------------------------------------------------------------------------------------------------------------------------------------------------------------------------------------------------------------------------------------------------------------------------------------------------------------------------------------------------------------------------------------------------------------------------------------------------------------------------------------------------------------------------------------------------------------------------------------------------------------------------------------------------------------------------------------------------------------------------------------------|
| 212236_x_at | Z19574 | JUP | Homo sapiens | 6-Oct-14 | Consensus sequence | GenBank | Consensus includes gb:Z19574 /DEF=H.sapiens gene for cytokeratin 17 /FEA=mRNA /DB_XREF=gi:30378 /UG=Hs.2785 keratin 17 | Z19574 | junction plakoglobin /// keratin 17 | JUP /// KRT17 | 3728 /// 3872 | NM_000422 ///<br>NM_002230 ///<br>NM_021991 ///<br>XM_005257313 ///<br>XM_005257349 ///<br>XM_006721871 ///<br>XM_006721872 ///<br>XM_006721873 ///<br>XM_006721874 ///<br>XM_006721875 ///<br>XM_006721876 ///<br>XM_006721877 ///<br>XM_006721878 | 0000122 // negative regulation of transcription from RNA polymerase II promoter // not recorded /// 0000902 // cell morphogenesis // not recorded /// 0002009 // morphogenesis of an epithelium // inferred from electronic annotation /// 0002159 // desmosome assembly // inferred from direct assay /// 0002159 // desmosome assembly // inferred from mutant phenotype /// 0003136 // negative regulation of heart induction by canonical Wnt signaling pathway // not recorded /// 0003181 // atrioventricular valve morphogenesis // not recorded /// 0003308 // negative regulation of Wnt signaling pathway | 0005634 // nucleus // inferred from mutant phenotype /// 0005667 // transcription factor complex // not recorded /// 0005737 // cytoplasm // inferred from mutant phenotype /// 0005737 // cytoplasm // inferred from electronic annotation /// 0005829 // cytosol // inferred from sequence or structural similarity /// 0005856 // cytoskeleton // inferred from sequence or structural | 0003713 // transcription coactivator activity // inferred from direct assay /// 0005198 // structural molecule activity // not recorded /// 0005198 // structural molecule activity // non-traceable author statement /// 0005199 // structural constituent of cell wall // inferred by curator /// 0005200 // structural constituent of cytoskeleton // traceable author statement /// 0005488 // binding // inferred from electronic annotation /// 0005515 // protein binding // inferred from physical interaction /// 0019901 // protein kinase binding // not recorded /// 0019903 // protein phosphatase binding // inferred from physical interaction /// 0032395 // MHC class II receptor activity // inferred from direct assay /// 0042289 // MHC class II |
|-------------|--------|-----|--------------|----------|--------------------|---------|------------------------------------------------------------------------------------------------------------------------|--------|-------------------------------------|---------------|---------------|-----------------------------------------------------------------------------------------------------------------------------------------------------------------------------------------------------------------------------------------------------|---------------------------------------------------------------------------------------------------------------------------------------------------------------------------------------------------------------------------------------------------------------------------------------------------------------------------------------------------------------------------------------------------------------------------------------------------------------------------------------------------------------------------------------------------------------------------------------------------------------------|-------------------------------------------------------------------------------------------------------------------------------------------------------------------------------------------------------------------------------------------------------------------------------------------------------------------------------------------------------------------------------------------|-----------------------------------------------------------------------------------------------------------------------------------------------------------------------------------------------------------------------------------------------------------------------------------------------------------------------------------------------------------------------------------------------------------------------------------------------------------------------------------------------------------------------------------------------------------------------------------------------------------------------------------------------------------------------------------------------------------------------------------------------------------------------|

|           |          |       |              |          |                    |         |                                                                                                                                                                                                                                                                                                                                   |          |                              |       |       |                                                                                        |                                                                                                                                                                                                                                                                                                                                                                                                                                                                                                                                                                                                                                                          |                                                                                                                                                                                                                                     |                                                                                                                                                                                                                                                                                                                                                                                                                                                                                  |
|-----------|----------|-------|--------------|----------|--------------------|---------|-----------------------------------------------------------------------------------------------------------------------------------------------------------------------------------------------------------------------------------------------------------------------------------------------------------------------------------|----------|------------------------------|-------|-------|----------------------------------------------------------------------------------------|----------------------------------------------------------------------------------------------------------------------------------------------------------------------------------------------------------------------------------------------------------------------------------------------------------------------------------------------------------------------------------------------------------------------------------------------------------------------------------------------------------------------------------------------------------------------------------------------------------------------------------------------------------|-------------------------------------------------------------------------------------------------------------------------------------------------------------------------------------------------------------------------------------|----------------------------------------------------------------------------------------------------------------------------------------------------------------------------------------------------------------------------------------------------------------------------------------------------------------------------------------------------------------------------------------------------------------------------------------------------------------------------------|
| 212430_at | AL109955 | RBM38 | Homo sapiens | 6-Oct-14 | Consensus sequence | GenBank | Consensus includes gb:AL109955 /DEF=Human DNA sequence from clone RP4-800J21 on chromosome 20 Contains ESTs, STSs, GSSs and CpG islands. Contains the 3 part of the RAE1 gene for a homolog to RNA export protein 1 from S.pombe and the gene for the ssDNA binding protein SEB4D.n /FEA=mRNA_1 /DB_XREF=gi:1558768 /UG=Hs.236361 | AL109955 | RNA binding motif protein 38 | RBM38 | 55544 | NM_001291780<br>/// NM_017495<br>/// NM_183425<br>/// XM_005260445<br>/// XM_005260446 | 0006397 // mRNA processing // inferred from electronic annotation /// 0006977 // DNA damage response, signal transduction by p53 class mediator resulting in cell cycle arrest // inferred from direct assay /// 0006978 // DNA damage response, signal transduction by p53 class mediator resulting in transcription of p21 class mediator // inferred from direct assay /// 0007049 // cell cycle // inferred from electronic annotation /// 0007050 // cell cycle arrest // inferred from direct assay /// 0008285 // negative regulation of cell proliferation // inferred from direct assay /// 0008380 // RNA splicing // inferred from electronic | 0005634 // nucleus // inferred from direct assay /// 0005737 // cytoplasm // inferred from electronic annotation /// 0005829 // cytosol // inferred from direct assay /// 0005829 // cytosol // inferred from electronic annotation | 0000166 // nucleotide binding // inferred from electronic annotation /// 0003676 // nucleic acid binding // inferred from electronic annotation /// 0003723 // RNA binding // inferred from electronic annotation /// 0003729 // mRNA binding // inferred from direct assay /// 0003729 // mRNA binding // inferred from electronic annotation /// 0003730 // mRNA 3'-UTR binding // inferred from direct assay /// 0044822 // poly(A) RNA binding // inferred from direct assay |
|-----------|----------|-------|--------------|----------|--------------------|---------|-----------------------------------------------------------------------------------------------------------------------------------------------------------------------------------------------------------------------------------------------------------------------------------------------------------------------------------|----------|------------------------------|-------|-------|----------------------------------------------------------------------------------------|----------------------------------------------------------------------------------------------------------------------------------------------------------------------------------------------------------------------------------------------------------------------------------------------------------------------------------------------------------------------------------------------------------------------------------------------------------------------------------------------------------------------------------------------------------------------------------------------------------------------------------------------------------|-------------------------------------------------------------------------------------------------------------------------------------------------------------------------------------------------------------------------------------|----------------------------------------------------------------------------------------------------------------------------------------------------------------------------------------------------------------------------------------------------------------------------------------------------------------------------------------------------------------------------------------------------------------------------------------------------------------------------------|

|           |          |       |              |          |                    |         |                                                                                                                                                                 |          |                            |       |       |                                                                                                                                                                                                                                                                                                                                    |                                                                                                                                                                                                                                                                                                                                                                                                                                                  |                                                                                                                                                                                           |                                                                                                                                                                                                                                                                                                                                                                                                               |
|-----------|----------|-------|--------------|----------|--------------------|---------|-----------------------------------------------------------------------------------------------------------------------------------------------------------------|----------|----------------------------|-------|-------|------------------------------------------------------------------------------------------------------------------------------------------------------------------------------------------------------------------------------------------------------------------------------------------------------------------------------------|--------------------------------------------------------------------------------------------------------------------------------------------------------------------------------------------------------------------------------------------------------------------------------------------------------------------------------------------------------------------------------------------------------------------------------------------------|-------------------------------------------------------------------------------------------------------------------------------------------------------------------------------------------|---------------------------------------------------------------------------------------------------------------------------------------------------------------------------------------------------------------------------------------------------------------------------------------------------------------------------------------------------------------------------------------------------------------|
| 212538_at | AL576253 | DOCK9 | Homo sapiens | 6-Oct-14 | Consensus sequence | GenBank | Consensus includes<br>gb:AL576253<br>/FEA=EST<br>/DB_XREF=gj:12938214<br>/DB_XREF=est:AL576253<br>/CLONE=CSODI073YM22 (3 prime)<br>/UG=Hs.8021 KIAA1058 protein | AL576253 | dedicator of cytokinesis 9 | DOCK9 | 23348 | NM_001130048<br>///<br>NM_001130049<br>///<br>NM_001130050<br>///<br>NM_015296<br>///<br>XM_005254034<br>///<br>XM_005254035<br>///<br>XM_005254036<br>///<br>XM_006719922<br>///<br>XM_006719923<br>///<br>XM_006719924<br>///<br>XM_006719925<br>///<br>XM_006719926<br>///<br>XM_006719927<br>///<br>XM_006719928<br>///<br>/// | 0007264 // small GTPase mediated signal transduction // inferred from electronic annotation /// 0007596 // blood coagulation // traceable author statement /// 0032319 // regulation of Rho GTPase activity // inferred from electronic annotation /// 0032321 // positive regulation of Rho GTPase activity // inferred from electronic annotation /// 0043547 // positive regulation of GTPase activity // inferred from electronic annotation | 0005829 // cytosol // traceable author statement /// 0012505 // endomembrane system // inferred from electronic annotation /// 0016020 // membrane // inferred from electronic annotation | 0005085 // guanyl-nucleotide exchange factor activity // inferred from electronic annotation /// 0005089 // Rho guanyl-nucleotide exchange factor activity // inferred from electronic annotation /// 0005488 // binding // inferred from electronic annotation /// 0005515 // protein binding // inferred from physical interaction /// 0017048 // Rho GTPase binding // inferred from electronic annotation |
|-----------|----------|-------|--------------|----------|--------------------|---------|-----------------------------------------------------------------------------------------------------------------------------------------------------------------|----------|----------------------------|-------|-------|------------------------------------------------------------------------------------------------------------------------------------------------------------------------------------------------------------------------------------------------------------------------------------------------------------------------------------|--------------------------------------------------------------------------------------------------------------------------------------------------------------------------------------------------------------------------------------------------------------------------------------------------------------------------------------------------------------------------------------------------------------------------------------------------|-------------------------------------------------------------------------------------------------------------------------------------------------------------------------------------------|---------------------------------------------------------------------------------------------------------------------------------------------------------------------------------------------------------------------------------------------------------------------------------------------------------------------------------------------------------------------------------------------------------------|

|             |          |          |              |          |                    |         |                                                                                                                                                                                 |          |                                                                                                                                                                                      |                                        |                              |                                                                                                                                                                                                                    |                                                                                                                                                                                                                                                                                                                                                                                                                                                                                                                                                                                                                                           |                                                                                                                                                                                                                                                                                                                                                              |                                                                                                                                                                                                                                                                                                                         |
|-------------|----------|----------|--------------|----------|--------------------|---------|---------------------------------------------------------------------------------------------------------------------------------------------------------------------------------|----------|--------------------------------------------------------------------------------------------------------------------------------------------------------------------------------------|----------------------------------------|------------------------------|--------------------------------------------------------------------------------------------------------------------------------------------------------------------------------------------------------------------|-------------------------------------------------------------------------------------------------------------------------------------------------------------------------------------------------------------------------------------------------------------------------------------------------------------------------------------------------------------------------------------------------------------------------------------------------------------------------------------------------------------------------------------------------------------------------------------------------------------------------------------------|--------------------------------------------------------------------------------------------------------------------------------------------------------------------------------------------------------------------------------------------------------------------------------------------------------------------------------------------------------------|-------------------------------------------------------------------------------------------------------------------------------------------------------------------------------------------------------------------------------------------------------------------------------------------------------------------------|
| 212671_s_at | BG397856 | HLA-DQA1 | Homo sapiens | 6-Oct-14 | Consensus sequence | GenBank | Consensus includes gb:BG397856 /FEA=EST /DB_XREF=gi:13291304 /DB_XREF=est:602438950F1 /CLONE=IMAGE:4564956 /UG=Hs.198253 major histocompatibility complex, class II, DQ alpha 1 | BG397856 | major histocompatibility complex, class II, DQ alpha 1 /// major histocompatibility complex, class II, DQ alpha 2 /// HLA class II histocompatibility antigen, DQ alpha 1 chain-like | HLA-DQA1 /// HLA-DQA2 /// LOC100509457 | 3117 /// 3118 /// 10050945 7 | NM_002122 /// NM_020056 /// XM_003120269 /// XM_003846468 /// XM_005274953 /// XM_005275108 /// XM_005275333 /// XM_005275542 /// XM_005275544 /// XM_005276080 /// XM_006715079 /// XM_006725484 /// XM_006725999 | 0002376 // immune system process // inferred from electronic annotation /// 0002504 // antigen processing and presentation of peptide or polysaccharide antigen via MHC class II // inferred from electronic annotation /// 0006955 // immune response // non-traceable author statement /// 0019221 // cytokine-mediated signaling pathway // traceable author statement /// 0019882 // antigen processing and presentation // inferred from electronic annotation /// 0019886 // antigen processing and presentation of exogenous peptide antigen via MHC class II // traceable author statement /// 0031295 // T cell costimulation // | 0000139 // Golgi membrane // traceable author statement /// 0005764 // lysosome // inferred from electronic annotation /// 0005765 // lysosomal membrane // traceable author statement /// 0005768 // endosome // inferred from electronic annotation /// 0005783 // endoplasmic reticulum // inferred from electronic annotation /// 0005789 // endoplasmic | 0005515 // protein binding // inferred from electronic annotation /// 0032395 // MHC class II receptor activity // non-traceable author statement /// 0032395 // MHC class II receptor activity // traceable author statement /// 0042605 // peptide antigen binding // inferred from sequence or structural similarity |
|-------------|----------|----------|--------------|----------|--------------------|---------|---------------------------------------------------------------------------------------------------------------------------------------------------------------------------------|----------|--------------------------------------------------------------------------------------------------------------------------------------------------------------------------------------|----------------------------------------|------------------------------|--------------------------------------------------------------------------------------------------------------------------------------------------------------------------------------------------------------------|-------------------------------------------------------------------------------------------------------------------------------------------------------------------------------------------------------------------------------------------------------------------------------------------------------------------------------------------------------------------------------------------------------------------------------------------------------------------------------------------------------------------------------------------------------------------------------------------------------------------------------------------|--------------------------------------------------------------------------------------------------------------------------------------------------------------------------------------------------------------------------------------------------------------------------------------------------------------------------------------------------------------|-------------------------------------------------------------------------------------------------------------------------------------------------------------------------------------------------------------------------------------------------------------------------------------------------------------------------|

|           |          |       |              |          |                    |         |                                                                                                                                                                                                                        |          |                                                                                                                                                        |                            |                               |                                                                                                                                                                                                                                                                     |                                                                                                                                                                                                                                                                                                                                           |                                                                                                                                                                                                                                                                                                                                                                                                      |                                                                                                                                                                                                                                                                               |
|-----------|----------|-------|--------------|----------|--------------------|---------|------------------------------------------------------------------------------------------------------------------------------------------------------------------------------------------------------------------------|----------|--------------------------------------------------------------------------------------------------------------------------------------------------------|----------------------------|-------------------------------|---------------------------------------------------------------------------------------------------------------------------------------------------------------------------------------------------------------------------------------------------------------------|-------------------------------------------------------------------------------------------------------------------------------------------------------------------------------------------------------------------------------------------------------------------------------------------------------------------------------------------|------------------------------------------------------------------------------------------------------------------------------------------------------------------------------------------------------------------------------------------------------------------------------------------------------------------------------------------------------------------------------------------------------|-------------------------------------------------------------------------------------------------------------------------------------------------------------------------------------------------------------------------------------------------------------------------------|
| 212687_at | AL110164 | LIMS1 | Homo sapiens | 6-Oct-14 | Consensus sequence | GenBank | Consensus includes gb:AL110164.1 /DEF=Homo sapiens mRNA; cDNA DKFZp586I0324 (from clone DKFZp586I0324 ). /FEA=mRNA /DB_XREF=gi:5817069 /UG=Hs.193700 Homo sapiens mRNA; cDNA DKFZp586I0324 (from clone DKFZp586I0324 ) | AL110164 | LIM and senescent cell antigen-like domains 1 /// LIM and senescent cell antigen-like domains 3 /// LIM and senescent cell antigen-like domains 3-like | LIMS1 /// LIMS3 /// LIMS3L | 3987 /// 96626 /// 10028869 5 | NM_001193482 /// NM_001193483 /// NM_001193484 /// NM_001193485 /// NM_001193488 /// NM_001205288 /// NM_004987 /// NM_033514 /// NR_027467 /// NR_038099 /// XM_005263563 /// XM_005263946 /// XM_005263947 /// XM_005263948 /// XM_005263949 /// XM_005263950 /// | 0007569 // cell aging // traceable author statement /// 0034329 // cell junction assembly // traceable author statement /// 0045892 // negative regulation of transcription, DNA-templated // inferred from direct assay /// 0071560 // cellular response to transforming growth factor beta stimulus // inferred from expression pattern | 0005737 // cytoplasm // inferred from electronic annotation /// 0005829 // cytosol // traceable author statement /// 0005886 // plasma membrane // inferred from electronic annotation /// 0005925 // focal adhesion // inferred from direct assay /// 0016020 // membrane // inferred from electronic annotation /// 0030054 // cell junction // inferred from electronic annotation /// 0048471 // | 0005515 // protein binding // inferred from physical interaction /// 0008270 // zinc ion binding // inferred from direct assay /// 0008270 // zinc ion binding // inferred from electronic annotation /// 0046872 // metal ion binding // inferred from electronic annotation |
| 212732_at | AI950273 | MEG3  | Homo sapiens | 6-Oct-14 | Consensus sequence | GenBank | Consensus includes gb:AI950273 /FEA=EST /DB_XREF=gi:5742583 /DB_XREF=est:wq37h05.x1 /CLONE=IMAGE:2473497 /UG=Hs.112844 maternally expressed 3                                                                          | AI950273 | maternally expressed 3 (non-protein coding)                                                                                                            | MEG3                       | 55384                         | NR_002766 /// NR_003530 /// NR_003531 /// NR_033358 /// NR_033359 /// NR_033360 /// NR_046464 /// NR_046465 /// NR_046466 /// NR_046467 /// NR_046468 /// NR_046469 /// NR_046470 /// NR_046471 /// NR_046472 /// NR_046473                                         |                                                                                                                                                                                                                                                                                                                                           |                                                                                                                                                                                                                                                                                                                                                                                                      |                                                                                                                                                                                                                                                                               |



|             |          |       |              |          |                    |         |                                                                                                                                                                                                                                                                                                            |          |                |       |       |           |                                                                                                                                                                                                                                                                                                                                                                                                                                                                                                                                                                                                                                                                          |                                                                                                                                                                                                                                                                                                                                                                                                                                      |                                                                                                                                                                                                                                                                                                 |
|-------------|----------|-------|--------------|----------|--------------------|---------|------------------------------------------------------------------------------------------------------------------------------------------------------------------------------------------------------------------------------------------------------------------------------------------------------------|----------|----------------|-------|-------|-----------|--------------------------------------------------------------------------------------------------------------------------------------------------------------------------------------------------------------------------------------------------------------------------------------------------------------------------------------------------------------------------------------------------------------------------------------------------------------------------------------------------------------------------------------------------------------------------------------------------------------------------------------------------------------------------|--------------------------------------------------------------------------------------------------------------------------------------------------------------------------------------------------------------------------------------------------------------------------------------------------------------------------------------------------------------------------------------------------------------------------------------|-------------------------------------------------------------------------------------------------------------------------------------------------------------------------------------------------------------------------------------------------------------------------------------------------|
| 212768_s_at | AL390736 | OLFM4 | Homo sapiens | 6-Oct-14 | Consensus sequence | GenBank | Consensus includes gb:AL390736 /DEF=Human DNA sequence from clone RP11-209J19 on chromosome 13 Contains ESTs, STSs and GSSs. Contains the gene for the GW112 protein with two isoforms (GW112 and KIAA4294) /FEA=mRNA /DB_XREF=gi:1182238 /UG=Hs.273321 differentially expressed in hematopoietic lineages | AL390736 | olfactomedin 4 | OLFM4 | 10562 | NM_006418 | 0007155 // cell adhesion // inferred from electronic annotation /// 0008152 // metabolic process // inferred from electronic annotation /// 0010939 // regulation of necrotic cell death // inferred from mutant phenotype /// 0042981 // regulation of apoptotic process // inferred from mutant phenotype /// 0043124 // negative regulation of I-kappaB kinase/NF-kappaB signaling // inferred from electronic annotation /// 0050764 // regulation of phagocytosis // inferred from mutant phenotype /// 0050777 // negative regulation of immune response // inferred from electronic annotation /// 0051260 // protein homooligomerization // inferred from mutant | 0005576 // extracellular region // inferred from electronic annotation /// 0005615 // extracellular space // inferred from direct assay /// 0005615 // extracellular space // inferred from mutant phenotype /// 0005739 // mitochondrion // inferred from electronic annotation /// 0005886 // plasma membrane // inferred from direct assay /// 0030141 // secretory granule // inferred from direct assay /// 0042581 // specific | 0003824 // catalytic activity // inferred from electronic annotation /// 0005515 // protein binding // inferred from electronic annotation /// 0042803 // protein homodimerization activity // inferred from mutant phenotype /// 0045296 // cadherin binding // inferred from mutant phenotype |
|-------------|----------|-------|--------------|----------|--------------------|---------|------------------------------------------------------------------------------------------------------------------------------------------------------------------------------------------------------------------------------------------------------------------------------------------------------------|----------|----------------|-------|-------|-----------|--------------------------------------------------------------------------------------------------------------------------------------------------------------------------------------------------------------------------------------------------------------------------------------------------------------------------------------------------------------------------------------------------------------------------------------------------------------------------------------------------------------------------------------------------------------------------------------------------------------------------------------------------------------------------|--------------------------------------------------------------------------------------------------------------------------------------------------------------------------------------------------------------------------------------------------------------------------------------------------------------------------------------------------------------------------------------------------------------------------------------|-------------------------------------------------------------------------------------------------------------------------------------------------------------------------------------------------------------------------------------------------------------------------------------------------|

|           |          |      |              |          |                    |         |                                                                                                                                                    |          |                     |      |       |                                                                                                                                   |                                                                                                                                                                                                                                                                                                                                                                                             |                                                                                                                                                                                                                                                                                                                                                                                                                                     |                                                                                                                                                                                                                                                                                                                      |
|-----------|----------|------|--------------|----------|--------------------|---------|----------------------------------------------------------------------------------------------------------------------------------------------------|----------|---------------------|------|-------|-----------------------------------------------------------------------------------------------------------------------------------|---------------------------------------------------------------------------------------------------------------------------------------------------------------------------------------------------------------------------------------------------------------------------------------------------------------------------------------------------------------------------------------------|-------------------------------------------------------------------------------------------------------------------------------------------------------------------------------------------------------------------------------------------------------------------------------------------------------------------------------------------------------------------------------------------------------------------------------------|----------------------------------------------------------------------------------------------------------------------------------------------------------------------------------------------------------------------------------------------------------------------------------------------------------------------|
| 212914_at | AV648364 | CBX7 | Homo sapiens | 6-Oct-14 | Consensus sequence | GenBank | Consensus includes<br>gb:AV648364<br>/FEA=EST<br>/DB_XREF=gi:9869378<br>/DB_XREF=est:AV648364<br>/CLONE=GLCBIF04<br>/UG=Hs.152151<br>plakophilin 4 | AV648364 | chromobox homolog 7 | CBX7 | 23492 | NM_175709 ///<br>XM_005261413 ///<br>XM_006724174 ///<br>XM_006724175 ///<br>XM_006724176 ///<br>XM_006724177 ///<br>XM_006724178 | 0000122 // negative regulation of transcription from RNA polymerase II promoter // inferred from mutant phenotype ///<br>0006351 // transcription, DNA-templated // inferred from electronic annotation ///<br>0006355 // regulation of transcription, DNA-templated // inferred from electronic annotation ///<br>0016568 // chromatin modification // inferred from electronic annotation | 0000790 // nuclear chromatin // inferred from direct assay ///<br>0000792 // heterochromatin // inferred from electronic annotation ///<br>0005634 // nucleus // inferred from direct assay ///<br>0005730 // nucleolus // inferred from direct assay ///<br>0005737 // cytoplasm // inferred from direct assay ///<br>0031519 // PcG protein complex // inferred from direct assay ///<br>0035102 // PRC1 complex // inferred from | 0003682 // chromatin binding // inferred from electronic annotation ///<br>0003727 // single-stranded RNA binding // inferred from electronic annotation ///<br>0005515 // protein binding // inferred from physical interaction ///<br>0035064 // methylated histone binding // inferred from electronic annotation |
|-----------|----------|------|--------------|----------|--------------------|---------|----------------------------------------------------------------------------------------------------------------------------------------------------|----------|---------------------|------|-------|-----------------------------------------------------------------------------------------------------------------------------------|---------------------------------------------------------------------------------------------------------------------------------------------------------------------------------------------------------------------------------------------------------------------------------------------------------------------------------------------------------------------------------------------|-------------------------------------------------------------------------------------------------------------------------------------------------------------------------------------------------------------------------------------------------------------------------------------------------------------------------------------------------------------------------------------------------------------------------------------|----------------------------------------------------------------------------------------------------------------------------------------------------------------------------------------------------------------------------------------------------------------------------------------------------------------------|

|           |          |       |              |          |                    |         |                                                                                                                                                                                             |          |                                                    |       |       |                                                                                                                                                                                                                                                                                                |                                                                                                                                                                                                                                                                                                                                                                                                                                                                                                                                                                                                                                           |                                                                                                                                                                                                                                                                                                                                                                                            |                                                                                                                                                                                                                                                                                                                                                                                                                                         |
|-----------|----------|-------|--------------|----------|--------------------|---------|---------------------------------------------------------------------------------------------------------------------------------------------------------------------------------------------|----------|----------------------------------------------------|-------|-------|------------------------------------------------------------------------------------------------------------------------------------------------------------------------------------------------------------------------------------------------------------------------------------------------|-------------------------------------------------------------------------------------------------------------------------------------------------------------------------------------------------------------------------------------------------------------------------------------------------------------------------------------------------------------------------------------------------------------------------------------------------------------------------------------------------------------------------------------------------------------------------------------------------------------------------------------------|--------------------------------------------------------------------------------------------------------------------------------------------------------------------------------------------------------------------------------------------------------------------------------------------------------------------------------------------------------------------------------------------|-----------------------------------------------------------------------------------------------------------------------------------------------------------------------------------------------------------------------------------------------------------------------------------------------------------------------------------------------------------------------------------------------------------------------------------------|
| 212935_at | AB002360 | MCF2L | Homo sapiens | 6-Oct-14 | Consensus sequence | GenBank | Consensus includes gb:AB002360.1 /DEF=Human mRNA for KIAA0362 gene, partial cds. /FEA=mRNA /GEN=KIAA0362 /DB_XREF=gi:224664 /UG=Hs.25515 MCF.2 cell line derived transforming sequence-like | AB002360 | MCF.2 cell line derived transforming sequence-like | MCF2L | 23263 | NM_001112732<br>/// NM_024979<br>/// XM_005268307<br>/// XM_005268308<br>/// XM_005268309<br>/// XM_005268310<br>/// XM_005268312<br>/// XM_005268313<br>/// XM_005268314<br>/// XM_005268315<br>/// XM_005268316<br>/// XM_006719966<br>/// XM_006719967<br>/// XM_006719968<br>/// XR_429282 | 0007264 // small GTPase mediated signal transduction // traceable author statement /// 0007266 // Rho protein signal transduction // inferred from electronic annotation /// 0032319 // regulation of Rho GTPase activity // inferred from electronic annotation /// 0032321 // positive regulation of Rho GTPase activity // inferred from electronic annotation /// 0035023 // regulation of Rho protein signal transduction // inferred from electronic annotation /// 0035556 // intracellular signal transduction // inferred from electronic annotation /// 0043065 // positive regulation of apoptotic process // traceable author | 0005615 // extracellular space // inferred from direct assay /// 0005737 // cytoplasm // inferred from electronic annotation /// 0005829 // cytosol // traceable author statement /// 0005886 // plasma membrane // inferred from electronic annotation /// 0016020 // membrane // inferred from electronic annotation /// 0030027 // lamellipodium // inferred from electronic annotation | 0005085 // guanyl-nucleotide exchange factor activity // inferred from electronic annotation /// 0005089 // Rho guanyl-nucleotide exchange factor activity // inferred from electronic annotation /// 0005515 // protein binding // inferred from electronic annotation /// 0005543 // phospholipid binding // inferred from electronic annotation /// 0005545 // 1-phosphatidylinositol binding // inferred from electronic annotation |
|-----------|----------|-------|--------------|----------|--------------------|---------|---------------------------------------------------------------------------------------------------------------------------------------------------------------------------------------------|----------|----------------------------------------------------|-------|-------|------------------------------------------------------------------------------------------------------------------------------------------------------------------------------------------------------------------------------------------------------------------------------------------------|-------------------------------------------------------------------------------------------------------------------------------------------------------------------------------------------------------------------------------------------------------------------------------------------------------------------------------------------------------------------------------------------------------------------------------------------------------------------------------------------------------------------------------------------------------------------------------------------------------------------------------------------|--------------------------------------------------------------------------------------------------------------------------------------------------------------------------------------------------------------------------------------------------------------------------------------------------------------------------------------------------------------------------------------------|-----------------------------------------------------------------------------------------------------------------------------------------------------------------------------------------------------------------------------------------------------------------------------------------------------------------------------------------------------------------------------------------------------------------------------------------|

|           |        |       |              |          |                    |         |                                                                                                                                                  |        |                                        |       |       |                                                                                                                                   |                                                                                                                                                                                                                                                                                                                                                                                                                                            |                                                                                                                                                                                                                                                                                                                                                                                                        |                                                                  |
|-----------|--------|-------|--------------|----------|--------------------|---------|--------------------------------------------------------------------------------------------------------------------------------------------------|--------|----------------------------------------|-------|-------|-----------------------------------------------------------------------------------------------------------------------------------|--------------------------------------------------------------------------------------------------------------------------------------------------------------------------------------------------------------------------------------------------------------------------------------------------------------------------------------------------------------------------------------------------------------------------------------------|--------------------------------------------------------------------------------------------------------------------------------------------------------------------------------------------------------------------------------------------------------------------------------------------------------------------------------------------------------------------------------------------------------|------------------------------------------------------------------|
| 212949_at | D38553 | NCAPH | Homo sapiens | 6-Oct-14 | Consensus sequence | GenBank | Consensus includes gb:D38553.1 /DEF=Homo sapiens HCAP-H mRNA, partial cds. /FEA=mRNA /GEN=HCAP-H /DB_XREF=gi:559714 /UG=Hs.1192 KIAA0074 protein | D38553 | non-SMC condensin I complex, subunit H | NCAPH | 23397 | NM_001281710 ///<br>NM_001281711 ///<br>NM_001281712 ///<br>NM_015341 ///<br>XM_005263907 ///<br>XM_005263908 ///<br>XM_006712388 | 0000278 // mitotic cell cycle // traceable author statement /// 0007049 // cell cycle // inferred from electronic annotation /// 0007067 // mitotic nuclear division // inferred from electronic annotation /// 0007076 // mitotic chromosome condensation // inferred from direct assay /// 0030261 // chromosome condensation // inferred from electronic annotation /// 0051301 // cell division // inferred from electronic annotation | 0000796 // condensin complex // inferred from direct assay /// 0005634 // nucleus // inferred from electronic annotation /// 0005694 // chromosome // inferred from electronic annotation /// 0005737 // cytoplasm // inferred from direct assay /// 0005829 // cytosol // traceable author statement /// 0015630 // microtubule cytoskeleton // inferred from direct assay /// 0016020 // membrane // | 0005515 // protein binding // inferred from physical interaction |
|-----------|--------|-------|--------------|----------|--------------------|---------|--------------------------------------------------------------------------------------------------------------------------------------------------|--------|----------------------------------------|-------|-------|-----------------------------------------------------------------------------------------------------------------------------------|--------------------------------------------------------------------------------------------------------------------------------------------------------------------------------------------------------------------------------------------------------------------------------------------------------------------------------------------------------------------------------------------------------------------------------------------|--------------------------------------------------------------------------------------------------------------------------------------------------------------------------------------------------------------------------------------------------------------------------------------------------------------------------------------------------------------------------------------------------------|------------------------------------------------------------------|

|             |          |         |              |          |                    |         |                                                                                                                                                                                                                    |          |                           |         |       |                                             |                                                                                                                                                                                                                                                                                 |                                                                                                                                                                                                           |                                                                                                                                                                                                                                                                                                 |
|-------------|----------|---------|--------------|----------|--------------------|---------|--------------------------------------------------------------------------------------------------------------------------------------------------------------------------------------------------------------------|----------|---------------------------|---------|-------|---------------------------------------------|---------------------------------------------------------------------------------------------------------------------------------------------------------------------------------------------------------------------------------------------------------------------------------|-----------------------------------------------------------------------------------------------------------------------------------------------------------------------------------------------------------|-------------------------------------------------------------------------------------------------------------------------------------------------------------------------------------------------------------------------------------------------------------------------------------------------|
| 213528_at   | AL035369 | METTL18 | Homo sapiens | 6-Oct-14 | Consensus sequence | GenBank | Consensus includes gb:AL035369.1 /DEF=H.sapiens novel gene from PAC 117P20, chromosome 1. /FEA=mRNA /PROD=hypothetical protein /DB_XREF=gi:4239681 /UG=Hs.33922 H.sapiens novel gene from PAC 117P20, chromosome 1 | AL035369 | methyltransferase like 18 | METTL18 | 92342 | NM_033418 /// XM_005245606 /// XM_006711627 | 0006479 // protein methylation // inferred from electronic annotation /// 0032259 // methylation // inferred from electronic annotation                                                                                                                                         | 0005737 // cytoplasm // inferred from electronic annotation                                                                                                                                               | 0008168 // methyltransferase activity // inferred from electronic annotation /// 0008276 // protein methyltransferase activity // inferred from electronic annotation /// 0016740 // transferase activity // inferred from electronic annotation                                                |
| 213629_x_at | BF246115 | MT1F    | Homo sapiens | 6-Oct-14 | Consensus sequence | GenBank | Consensus includes gb:BF246115 /FEA=EST /DB_XREF=gi:1160133 /DB_XREF=est:601854068F1 /CLONE=IMAGE:4073921 /UG=Hs.8765 RNA helicase-related protein                                                                 | BF246115 | metallothionein 1F        | MT1F    | 4494  | NM_005949                                   | 0045926 // negative regulation of growth // inferred from sequence or structural similarity /// 0071276 // cellular response to cadmium ion // inferred from expression pattern /// 0071294 // cellular response to zinc ion // inferred from sequence or structural similarity | 0005634 // nucleus // inferred from direct assay /// 0005737 // cytoplasm // inferred from direct assay /// 0048471 // perinuclear region of cytoplasm // inferred from sequence or structural similarity | 0005507 // copper ion binding // non-traceable author statement /// 0008270 // zinc ion binding // inferred from sequence or structural similarity /// 0046870 // cadmium ion binding // non-traceable author statement /// 0046872 // metal ion binding // inferred from electronic annotation |

|           |          |         |              |          |                    |         |                                                                                                                                                                                                                                                       |          |                                   |         |        |                                                                                                                                                                         |                                                                                                                                                                                                                                                                                                                                                                                                                          |                                                                                                                                                                                                                                                                                                                                                                                                          |                                                                                                                                                                          |
|-----------|----------|---------|--------------|----------|--------------------|---------|-------------------------------------------------------------------------------------------------------------------------------------------------------------------------------------------------------------------------------------------------------|----------|-----------------------------------|---------|--------|-------------------------------------------------------------------------------------------------------------------------------------------------------------------------|--------------------------------------------------------------------------------------------------------------------------------------------------------------------------------------------------------------------------------------------------------------------------------------------------------------------------------------------------------------------------------------------------------------------------|----------------------------------------------------------------------------------------------------------------------------------------------------------------------------------------------------------------------------------------------------------------------------------------------------------------------------------------------------------------------------------------------------------|--------------------------------------------------------------------------------------------------------------------------------------------------------------------------|
| 213638_at | AW054711 | PHACTR1 | Homo sapiens | 6-Oct-14 | Consensus sequence | GenBank | Consensus includes<br>gb:AW054711<br>/FEA=EST<br>/DB_XREF=gi:5920414<br>/DB_XREF=est:wz96g08.x1<br>/CLONE=IMAGE:2566718<br>/UG=Hs.121591<br>Human DNA sequence from PAC 257A7 on chromosome 6p24. Contains two unknown genes and ESTs, STSs and a GSS | AW054711 | phosphatase and actin regulator 1 | PHACTR1 | 221692 | NM_001242648<br>/// NM_030948<br>///<br>XM_005248933<br>///<br>XM_005248934<br>///<br>XM_005248935<br>///<br>XM_005248936<br>///<br>XM_005248937<br>///<br>XM_006715021 | 0031032 // actomyosin structure organization // inferred from mutant phenotype /// 0031532 // actin cytoskeleton reorganization // inferred from sequence or structural similarity /// 0043086 // negative regulation of catalytic activity // inferred from electronic annotation /// 0043149 // stress fiber assembly // inferred from mutant phenotype /// 0048870 // cell motility // inferred from mutant phenotype | 0005634 // nucleus // inferred from sequence or structural similarity /// 0005737 // cytoplasm // inferred from electronic annotation /// 0005737 // cytoplasm // inferred from direct assay /// 0005829 // cytosol // inferred from sequence or structural similarity /// 0030054 // cell junction // inferred from electronic annotation /// 0045202 // synapse // inferred from electronic annotation | 0003779 // actin binding // inferred from sequence or structural similarity /// 0004864 // protein phosphatase inhibitor activity // inferred from electronic annotation |
|-----------|----------|---------|--------------|----------|--------------------|---------|-------------------------------------------------------------------------------------------------------------------------------------------------------------------------------------------------------------------------------------------------------|----------|-----------------------------------|---------|--------|-------------------------------------------------------------------------------------------------------------------------------------------------------------------------|--------------------------------------------------------------------------------------------------------------------------------------------------------------------------------------------------------------------------------------------------------------------------------------------------------------------------------------------------------------------------------------------------------------------------|----------------------------------------------------------------------------------------------------------------------------------------------------------------------------------------------------------------------------------------------------------------------------------------------------------------------------------------------------------------------------------------------------------|--------------------------------------------------------------------------------------------------------------------------------------------------------------------------|

|           |          |         |              |          |                    |         |                                                                                                                                                    |          |                                                                                                  |                                              |                                             |                                                                                                                                                                                                                                                                                                  |  |                                                                                                                                                                                                                      |  |
|-----------|----------|---------|--------------|----------|--------------------|---------|----------------------------------------------------------------------------------------------------------------------------------------------------|----------|--------------------------------------------------------------------------------------------------|----------------------------------------------|---------------------------------------------|--------------------------------------------------------------------------------------------------------------------------------------------------------------------------------------------------------------------------------------------------------------------------------------------------|--|----------------------------------------------------------------------------------------------------------------------------------------------------------------------------------------------------------------------|--|
| 213650_at | AW006438 | GOLGA8A | Homo sapiens | 6-Oct-14 | Consensus sequence | GenBank | Consensus includes<br>gb:AW006438<br>/FEA=EST<br>/DB_XREF=gi:5855216<br>/DB_XREF=est:wr16f06.x1<br>/CLONE=IMAGE:2481731<br>/UG=Hs.182982 golgin-67 | AW006438 | golgin A8 family, member A<br>/// golgin A8 family, member B /// uncharacterized<br>LOC101930583 | GOLGA8 A ///<br>GOLGA8 B ///<br>LOC101930583 | 23015 ///<br>440270<br>///<br>10193058<br>3 | NM_001023567<br>/// NM_181077<br>/// NR_027409 ///<br>NR_027410 ///<br>XM_005254389<br>///<br>XM_005254391<br>///<br>XM_006720440<br>///<br>XM_006720530<br>/// XR_248092 ///<br>XR_248093 ///<br>XR_248094 ///<br>XR_248096 ///<br>XR_424599 ///<br>XR_424600 ///<br>XR_424601 ///<br>XR_424602 |  | 0005794 // Golgi apparatus // inferred from electronic annotation ///<br>0016020 // membrane // inferred from electronic annotation ///<br>0032580 // Golgi cisterna membrane // inferred from electronic annotation |  |
|-----------|----------|---------|--------------|----------|--------------------|---------|----------------------------------------------------------------------------------------------------------------------------------------------------|----------|--------------------------------------------------------------------------------------------------|----------------------------------------------|---------------------------------------------|--------------------------------------------------------------------------------------------------------------------------------------------------------------------------------------------------------------------------------------------------------------------------------------------------|--|----------------------------------------------------------------------------------------------------------------------------------------------------------------------------------------------------------------------|--|

|             |          |        |              |          |                    |         |                                                                                                                                                                                                     |          |                                                         |        |      |                                                                                                    |                                                                                                                                                                                                                                                                                                                                                                                                                                                                                                                                                                 |  |                                                                                                                                                                       |
|-------------|----------|--------|--------------|----------|--------------------|---------|-----------------------------------------------------------------------------------------------------------------------------------------------------------------------------------------------------|----------|---------------------------------------------------------|--------|------|----------------------------------------------------------------------------------------------------|-----------------------------------------------------------------------------------------------------------------------------------------------------------------------------------------------------------------------------------------------------------------------------------------------------------------------------------------------------------------------------------------------------------------------------------------------------------------------------------------------------------------------------------------------------------------|--|-----------------------------------------------------------------------------------------------------------------------------------------------------------------------|
| 213774_s_at | AW614578 | PPP1R2 | Homo sapiens | 6-Oct-14 | Consensus sequence | GenBank | Consensus includes<br>gb:AW614578<br>/FEA=EST<br>/DB_XREF=gi:7319764<br>/DB_XREF=est:hh01f08.x1<br>/CLONE=IMAGE:2953863<br>/UG=Hs.267819<br>protein phosphatase 1, regulatory (inhibitor) subunit 2 | AW614578 | protein phosphatase 1, regulatory (inhibitor) subunit 2 | PPP1R2 | 5504 | NM_001291504<br>///<br>NM_001291505<br>/// NM_006241<br>///<br>XM_006713682<br>///<br>XM_006713683 | 0005977 // glycogen metabolic process // inferred from electronic annotation /// 0006091 // generation of precursor metabolites and energy // traceable author statement /// 0009966 // regulation of signal transduction // inferred from electronic annotation /// 0043086 // negative regulation of catalytic activity // inferred from electronic annotation /// 0043086 // negative regulation of catalytic activity // traceable author statement /// 0043666 // regulation of phosphoprotein phosphatase activity // inferred from electronic annotation |  | 0004865 // protein serine/threonine phosphatase inhibitor activity // traceable author statement /// 0005515 // protein binding // inferred from physical interaction |
|-------------|----------|--------|--------------|----------|--------------------|---------|-----------------------------------------------------------------------------------------------------------------------------------------------------------------------------------------------------|----------|---------------------------------------------------------|--------|------|----------------------------------------------------------------------------------------------------|-----------------------------------------------------------------------------------------------------------------------------------------------------------------------------------------------------------------------------------------------------------------------------------------------------------------------------------------------------------------------------------------------------------------------------------------------------------------------------------------------------------------------------------------------------------------|--|-----------------------------------------------------------------------------------------------------------------------------------------------------------------------|



|             |          |          |              |          |                    |         |                                                                                                                                                                                                                                                               |          |                                                                   |                           |                    |                                                                                                                                                                                                      |                                                                                                                                                                                                                                                                                                                                                                                                                                                                                                                                                                                                                                           |                                                                                                                                                                                                                                                                                                                                                              |                                                                                                                                                                                                                                                                                                                         |
|-------------|----------|----------|--------------|----------|--------------------|---------|---------------------------------------------------------------------------------------------------------------------------------------------------------------------------------------------------------------------------------------------------------------|----------|-------------------------------------------------------------------|---------------------------|--------------------|------------------------------------------------------------------------------------------------------------------------------------------------------------------------------------------------------|-------------------------------------------------------------------------------------------------------------------------------------------------------------------------------------------------------------------------------------------------------------------------------------------------------------------------------------------------------------------------------------------------------------------------------------------------------------------------------------------------------------------------------------------------------------------------------------------------------------------------------------------|--------------------------------------------------------------------------------------------------------------------------------------------------------------------------------------------------------------------------------------------------------------------------------------------------------------------------------------------------------------|-------------------------------------------------------------------------------------------------------------------------------------------------------------------------------------------------------------------------------------------------------------------------------------------------------------------------|
| 213831_at   | X00452   | HLA-DQA1 | Homo sapiens | 6-Oct-14 | Consensus sequence | GenBank | Consensus includes gb:X00452.1 /DEF=Human mRNA for DC classII histocompatibility antigen alpha-chain. /FEA=mRNA /PROD=DC classII histocompatibility antigenalpha chain /DB_XREF=gi:32265 /UG=Hs.198253 major histocompatibility complex, class II, DQ alpha 1 | X00452   | major histocompatibility complex, class II, DQ alpha 1 chain-like | HLA-DQA1 /// LOC100509457 | 3117 /// 100509457 | NM_002122 /// XM_003120269 /// XM_003846468 /// XM_005274953 /// XM_005275108 /// XM_005275333 /// XM_005275542 /// XM_005275544 /// XM_005276080 /// XM_006715079 /// XM_006725484 /// XM_006725999 | 0002376 // immune system process // inferred from electronic annotation /// 0002504 // antigen processing and presentation of peptide or polysaccharide antigen via MHC class II // inferred from electronic annotation /// 0006955 // immune response // non-traceable author statement /// 0019221 // cytokine-mediated signaling pathway // traceable author statement /// 0019882 // antigen processing and presentation // inferred from electronic annotation /// 0019886 // antigen processing and presentation of exogenous peptide antigen via MHC class II // traceable author statement /// 0031295 // T cell costimulation // | 0000139 // Golgi membrane // traceable author statement /// 0005764 // lysosome // inferred from electronic annotation /// 0005765 // lysosomal membrane // traceable author statement /// 0005768 // endosome // inferred from electronic annotation /// 0005783 // endoplasmic reticulum // inferred from electronic annotation /// 0005789 // endoplasmic | 0005515 // protein binding // inferred from electronic annotation /// 0032395 // MHC class II receptor activity // non-traceable author statement /// 0032395 // MHC class II receptor activity // traceable author statement /// 0042605 // peptide antigen binding // inferred from sequence or structural similarity |
| 213991_s_at | BF940710 | HS3ST1   | Homo sapiens | 6-Oct-14 | Consensus sequence | GenBank | Consensus includes gb:BF940710 /FEA=EST /DB_XREF=gi:12358030 /DB_XREF=est:nae24b08.x1 /CLONE=IMAGE:3435999 /UG=Hs.40968 heparan sulfate (glucosamine) 3-O-sulfotransferase 1                                                                                  | BF940710 | heparan sulfate (glucosamine) 3-O-sulfotransferase 1              | HS3ST1                    | 9957               | NM_005114 /// XM_005248221                                                                                                                                                                           | 0005975 // carbohydrate metabolic process // traceable author statement /// 0006024 // glycosaminoglycan biosynthetic process // traceable author statement /// 0030203 // glycosaminoglycan metabolic process // traceable author statement /// 0044281 // small molecule metabolic process // traceable author statement                                                                                                                                                                                                                                                                                                                | 0005796 // Golgi lumen // traceable author statement /// 0016021 // integral component of membrane // traceable author statement                                                                                                                                                                                                                             | 0008146 // sulfotransferase activity // traceable author statement /// 0008467 // [heparan sulfate]-glucosamine 3-sulfotransferase 1 activity // inferred from electronic annotation                                                                                                                                    |

|             |          |       |              |          |                    |         |                                                                                                                                                                                                |          |                                        |       |       |                                                                       |                                                                                                                                                                                                                                                                                                                                                                                                                                                                                                                                                                                                                                       |                                                                                                                                                                              |                                                                                                                                                                                                                                                                                                                                                                                                                                                                                                                                                                                                                                                                                                                                                       |
|-------------|----------|-------|--------------|----------|--------------------|---------|------------------------------------------------------------------------------------------------------------------------------------------------------------------------------------------------|----------|----------------------------------------|-------|-------|-----------------------------------------------------------------------|---------------------------------------------------------------------------------------------------------------------------------------------------------------------------------------------------------------------------------------------------------------------------------------------------------------------------------------------------------------------------------------------------------------------------------------------------------------------------------------------------------------------------------------------------------------------------------------------------------------------------------------|------------------------------------------------------------------------------------------------------------------------------------------------------------------------------|-------------------------------------------------------------------------------------------------------------------------------------------------------------------------------------------------------------------------------------------------------------------------------------------------------------------------------------------------------------------------------------------------------------------------------------------------------------------------------------------------------------------------------------------------------------------------------------------------------------------------------------------------------------------------------------------------------------------------------------------------------|
| 213998_s_at | AW188131 | DDX17 | Homo sapiens | 6-Oct-14 | Consensus sequence | GenBank | Consensus includes<br>gb:AW188131<br>/FEA=EST<br>/DB_XREF=gi:6462567<br>/DB_XREF=est:xj92f11.x1<br>/CLONE=IMAGE:2664717<br>/UG=Hs.6179<br>DEADH (Asp-Glu-Ala-AspHis) box polypeptide 17 (72kD) | AW188131 | DEAD (Asp-Glu-Ala-Asp) box helicase 17 | DDX17 | 10521 | NM_001098504<br>///<br>NM_001098505<br>/// NM_006386<br>/// NM_030881 | 0006200 // ATP catabolic process // inferred from electronic annotation ///<br>0006200 // ATP catabolic process // traceable author statement ///<br>0006351 // transcription, DNA-templated // inferred from electronic annotation ///<br>0006355 // regulation of transcription, DNA-templated // inferred from electronic annotation ///<br>0006396 // RNA processing // traceable author statement ///<br>0008152 // metabolic process // inferred from electronic annotation ///<br>0009791 // post-embryonic development // inferred from electronic annotation ///<br>0033148 // positive regulation of intracellular estrogen | 0005634 // nucleus // inferred from direct assay ///<br>0005730 // nucleolus // inferred from electronic annotation ///<br>0016020 // membrane // inferred from direct assay | 0000166 // nucleotide binding // inferred from electronic annotation ///<br>0003676 // nucleic acid binding // inferred from electronic annotation ///<br>0003713 // transcription coactivator activity // inferred from direct assay ///<br>0003723 // RNA binding // traceable author statement ///<br>0003724 // RNA helicase activity // traceable author statement ///<br>0004386 // helicase activity // inferred from electronic annotation ///<br>0005515 // protein binding // inferred from physical interaction ///<br>0005524 // ATP binding // inferred from electronic annotation ///<br>0008026 // ATP-dependent helicase activity // inferred from electronic annotation ///<br>0008186 // RNA-dependent ATPase activity // traceable |
|-------------|----------|-------|--------------|----------|--------------------|---------|------------------------------------------------------------------------------------------------------------------------------------------------------------------------------------------------|----------|----------------------------------------|-------|-------|-----------------------------------------------------------------------|---------------------------------------------------------------------------------------------------------------------------------------------------------------------------------------------------------------------------------------------------------------------------------------------------------------------------------------------------------------------------------------------------------------------------------------------------------------------------------------------------------------------------------------------------------------------------------------------------------------------------------------|------------------------------------------------------------------------------------------------------------------------------------------------------------------------------|-------------------------------------------------------------------------------------------------------------------------------------------------------------------------------------------------------------------------------------------------------------------------------------------------------------------------------------------------------------------------------------------------------------------------------------------------------------------------------------------------------------------------------------------------------------------------------------------------------------------------------------------------------------------------------------------------------------------------------------------------------|

|           |          |       |              |          |                    |         |                                                                                                                                                                                                                     |          |                                        |       |       |                                                                                                    |                                                                                                                                                                                                                                                                                                                                                                                                                                                                                                                                                                                                                                                   |                                                                                                                                                                                                                                                                                                                                                                                                 |                                                                                                                                                                                                                                                                                                                                                                                                                                                                                                                                                                                                                                                                                                                                                           |
|-----------|----------|-------|--------------|----------|--------------------|---------|---------------------------------------------------------------------------------------------------------------------------------------------------------------------------------------------------------------------|----------|----------------------------------------|-------|-------|----------------------------------------------------------------------------------------------------|---------------------------------------------------------------------------------------------------------------------------------------------------------------------------------------------------------------------------------------------------------------------------------------------------------------------------------------------------------------------------------------------------------------------------------------------------------------------------------------------------------------------------------------------------------------------------------------------------------------------------------------------------|-------------------------------------------------------------------------------------------------------------------------------------------------------------------------------------------------------------------------------------------------------------------------------------------------------------------------------------------------------------------------------------------------|-----------------------------------------------------------------------------------------------------------------------------------------------------------------------------------------------------------------------------------------------------------------------------------------------------------------------------------------------------------------------------------------------------------------------------------------------------------------------------------------------------------------------------------------------------------------------------------------------------------------------------------------------------------------------------------------------------------------------------------------------------------|
| 214012_at | BE551138 | ERAP1 | Homo sapiens | 6-Oct-14 | Consensus sequence | GenBank | Consensus includes<br>gb:BE551138<br>/FEA=EST<br>/DB_XREF=gi:9792830<br>/DB_XREF=est:7b55a07.x1<br>/CLONE=IMAGE:3232116<br>/UG=Hs.247043<br>type 1 tumor necrosis factor receptor shedding aminopeptidase regulator | BE551138 | endoplasmic reticulum aminopeptidase 1 | ERAP1 | 51752 | NM_001040458<br>///<br>NM_001198541<br>/// NM_016442<br>///<br>XM_005272015<br>///<br>XM_005272016 | 0001525 // angiogenesis // traceable author statement /// 0002376 // immune system process // inferred from electronic annotation /// 0002474 // antigen processing and presentation of peptide antigen via MHC class I // traceable author statement /// 0006508 // proteolysis // inferred from electronic annotation /// 0006509 // membrane protein ectodomain proteolysis // inferred from direct assay /// 0008217 // regulation of blood pressure // non-traceable author statement /// 0008217 // regulation of blood pressure // traceable author statement /// 0009617 // response to bacterium // inferred from expression pattern /// | 0005576 // extracellular region // inferred from direct assay /// 0005615 // extracellular space // inferred from direct assay /// 0005737 // cytoplasm // inferred from electronic annotation /// 0005783 // endoplasmic reticulum // non-traceable author statement /// 0005788 // endoplasmic reticulum lumen // traceable author statement /// 0005789 // endoplasmic reticulum membrane // | 0004177 // aminopeptidase activity // inferred from direct assay /// 0005138 // interleukin-6 receptor binding // inferred from physical interaction /// 0005151 // interleukin-1, Type II receptor binding // traceable author statement /// 0005515 // protein binding // inferred from physical interaction /// 0008233 // peptidase activity // inferred from electronic annotation /// 0008235 // metalloexopeptidase activity // inferred from direct assay /// 0008237 // metallopeptidase activity // inferred from electronic annotation /// 0008270 // zinc ion binding // non-traceable author statement /// 0016787 // hydrolase activity // inferred from electronic annotation /// 0046872 // metal ion binding // inferred from electronic |
|-----------|----------|-------|--------------|----------|--------------------|---------|---------------------------------------------------------------------------------------------------------------------------------------------------------------------------------------------------------------------|----------|----------------------------------------|-------|-------|----------------------------------------------------------------------------------------------------|---------------------------------------------------------------------------------------------------------------------------------------------------------------------------------------------------------------------------------------------------------------------------------------------------------------------------------------------------------------------------------------------------------------------------------------------------------------------------------------------------------------------------------------------------------------------------------------------------------------------------------------------------|-------------------------------------------------------------------------------------------------------------------------------------------------------------------------------------------------------------------------------------------------------------------------------------------------------------------------------------------------------------------------------------------------|-----------------------------------------------------------------------------------------------------------------------------------------------------------------------------------------------------------------------------------------------------------------------------------------------------------------------------------------------------------------------------------------------------------------------------------------------------------------------------------------------------------------------------------------------------------------------------------------------------------------------------------------------------------------------------------------------------------------------------------------------------------|

|           |          |       |              |          |                    |         |                                                                                                                                                                                                                                                     |          |                                        |       |       |                                                                               |                                                                                                                                                                                                                                                                                                                                                                                                                                                                                                                                                                                                                                                   |                                                                                                                                                                                                                                                                                                                                                                                                 |                                                                                                                                                                                                                                                                                                                                                                                                                                                                                                                                                                                                                                                                                                                                                           |
|-----------|----------|-------|--------------|----------|--------------------|---------|-----------------------------------------------------------------------------------------------------------------------------------------------------------------------------------------------------------------------------------------------------|----------|----------------------------------------|-------|-------|-------------------------------------------------------------------------------|---------------------------------------------------------------------------------------------------------------------------------------------------------------------------------------------------------------------------------------------------------------------------------------------------------------------------------------------------------------------------------------------------------------------------------------------------------------------------------------------------------------------------------------------------------------------------------------------------------------------------------------------------|-------------------------------------------------------------------------------------------------------------------------------------------------------------------------------------------------------------------------------------------------------------------------------------------------------------------------------------------------------------------------------------------------|-----------------------------------------------------------------------------------------------------------------------------------------------------------------------------------------------------------------------------------------------------------------------------------------------------------------------------------------------------------------------------------------------------------------------------------------------------------------------------------------------------------------------------------------------------------------------------------------------------------------------------------------------------------------------------------------------------------------------------------------------------------|
| 214034_at | AB011097 | ERAP1 | Homo sapiens | 6-Oct-14 | Consensus sequence | GenBank | Consensus includes gb:AB011097.1 /DEF=Homo sapiens mRNA for KIAA0525 protein, partial cds. /FEA=mRNA /GEN=KIAA0525 /PROD=KIAA0525 protein /DB_XREF=gi:3043573 /UG=Hs.247043 type 1 tumor necrosis factor receptor shedding aminopeptidase regulator | AB011097 | endoplasmic reticulum aminopeptidase 1 | ERAP1 | 51752 | NM_001040458 /// NM_001198541 /// NM_016442 /// XM_005272015 /// XM_005272016 | 0001525 // angiogenesis // traceable author statement /// 0002376 // immune system process // inferred from electronic annotation /// 0002474 // antigen processing and presentation of peptide antigen via MHC class I // traceable author statement /// 0006508 // proteolysis // inferred from electronic annotation /// 0006509 // membrane protein ectodomain proteolysis // inferred from direct assay /// 0008217 // regulation of blood pressure // non-traceable author statement /// 0008217 // regulation of blood pressure // traceable author statement /// 0009617 // response to bacterium // inferred from expression pattern /// | 0005576 // extracellular region // inferred from direct assay /// 0005615 // extracellular space // inferred from direct assay /// 0005737 // cytoplasm // inferred from electronic annotation /// 0005783 // endoplasmic reticulum // non-traceable author statement /// 0005788 // endoplasmic reticulum lumen // traceable author statement /// 0005789 // endoplasmic reticulum membrane // | 0004177 // aminopeptidase activity // inferred from direct assay /// 0005138 // interleukin-6 receptor binding // inferred from physical interaction /// 0005151 // interleukin-1, Type II receptor binding // traceable author statement /// 0005515 // protein binding // inferred from physical interaction /// 0008233 // peptidase activity // inferred from electronic annotation /// 0008235 // metalloexopeptidase activity // inferred from direct assay /// 0008237 // metallopeptidase activity // inferred from electronic annotation /// 0008270 // zinc ion binding // non-traceable author statement /// 0016787 // hydrolase activity // inferred from electronic annotation /// 0046872 // metal ion binding // inferred from electronic |
|-----------|----------|-------|--------------|----------|--------------------|---------|-----------------------------------------------------------------------------------------------------------------------------------------------------------------------------------------------------------------------------------------------------|----------|----------------------------------------|-------|-------|-------------------------------------------------------------------------------|---------------------------------------------------------------------------------------------------------------------------------------------------------------------------------------------------------------------------------------------------------------------------------------------------------------------------------------------------------------------------------------------------------------------------------------------------------------------------------------------------------------------------------------------------------------------------------------------------------------------------------------------------|-------------------------------------------------------------------------------------------------------------------------------------------------------------------------------------------------------------------------------------------------------------------------------------------------------------------------------------------------------------------------------------------------|-----------------------------------------------------------------------------------------------------------------------------------------------------------------------------------------------------------------------------------------------------------------------------------------------------------------------------------------------------------------------------------------------------------------------------------------------------------------------------------------------------------------------------------------------------------------------------------------------------------------------------------------------------------------------------------------------------------------------------------------------------------|

|             |          |      |              |          |                    |         |                                                                                                                                                                                |          |                                     |      |      |                                                                                                    |                                                                                                                                                                                                                                                                                                                                                                                                                                                                                                                                                                                                                                                                                |                                                                                                                                                                                                                                                                                                  |                                                                                                                                                                                                                                                                                                                                                                                                                                                                                                                                                    |
|-------------|----------|------|--------------|----------|--------------------|---------|--------------------------------------------------------------------------------------------------------------------------------------------------------------------------------|----------|-------------------------------------|------|------|----------------------------------------------------------------------------------------------------|--------------------------------------------------------------------------------------------------------------------------------------------------------------------------------------------------------------------------------------------------------------------------------------------------------------------------------------------------------------------------------------------------------------------------------------------------------------------------------------------------------------------------------------------------------------------------------------------------------------------------------------------------------------------------------|--------------------------------------------------------------------------------------------------------------------------------------------------------------------------------------------------------------------------------------------------------------------------------------------------|----------------------------------------------------------------------------------------------------------------------------------------------------------------------------------------------------------------------------------------------------------------------------------------------------------------------------------------------------------------------------------------------------------------------------------------------------------------------------------------------------------------------------------------------------|
| 214047_s_at | AI913365 | MBD4 | Homo sapiens | 6-Oct-14 | Consensus sequence | GenBank | Consensus includes<br>gb:AI913365<br>/FEA=EST<br>/DB_XREF=gi:5633220<br>/DB_XREF=est:wa11d06.x1<br>/CLONE=IMAGE:2297771<br>/UG=Hs.35947<br>methyl-CpG binding domain protein 4 | AI913365 | methyl-CpG binding domain protein 4 | MBD4 | 8930 | NM_001276270<br>///<br>NM_001276271<br>///<br>NM_001276272<br>///<br>NM_001276273<br>/// NM_003925 | 0000737 // DNA catabolic process, endonucleolytic<br>// traceable author statement /// 0006281 // DNA repair // traceable author statement /// 0006284 // base-excision repair // traceable author statement /// 0006285 // base-excision repair, AP site formation // traceable author statement /// 0006974 // cellular response to DNA damage stimulus // inferred from electronic annotation /// 0007095 // mitotic G2 DNA damage checkpoint // inferred from electronic annotation /// 0008630 // intrinsic apoptotic signaling pathway in response to DNA damage // inferred from electronic annotation /// 0009314 // response to radiation // inferred from electronic | 0000785 // chromatin // inferred from electronic annotation /// 0005634 // nucleus // inferred from direct assay /// 0005654 // nucleoplasm // traceable author statement /// 0005730 // nucleolus // inferred from direct assay /// 0005737 // cytoplasm // inferred from electronic annotation | 0003677 // DNA binding // inferred from electronic annotation /// 0003696 // satellite DNA binding // traceable author statement /// 0003824 // catalytic activity // inferred from electronic annotation /// 0004520 // endodeoxyribonuclease activity // traceable author statement /// 0005515 // protein binding // inferred from physical interaction /// 0008263 // pyrimidine-specific mismatch base pair DNA N-glycosylase activity // inferred from direct assay /// 0016787 // hydrolase activity // inferred from electronic annotation |
|-------------|----------|------|--------------|----------|--------------------|---------|--------------------------------------------------------------------------------------------------------------------------------------------------------------------------------|----------|-------------------------------------|------|------|----------------------------------------------------------------------------------------------------|--------------------------------------------------------------------------------------------------------------------------------------------------------------------------------------------------------------------------------------------------------------------------------------------------------------------------------------------------------------------------------------------------------------------------------------------------------------------------------------------------------------------------------------------------------------------------------------------------------------------------------------------------------------------------------|--------------------------------------------------------------------------------------------------------------------------------------------------------------------------------------------------------------------------------------------------------------------------------------------------|----------------------------------------------------------------------------------------------------------------------------------------------------------------------------------------------------------------------------------------------------------------------------------------------------------------------------------------------------------------------------------------------------------------------------------------------------------------------------------------------------------------------------------------------------|

|           |          |      |              |          |                    |         |                                                                                                                                                                                |          |                                     |      |      |                                                                                                    |                                                                                                                                                                                                                                                                                                                                                                                                                                                                                                                                                                                                                                                                                |                                                                                                                                                                                                                                                                                                  |                                                                                                                                                                                                                                                                                                                                                                                                                                                                                                                                                    |
|-----------|----------|------|--------------|----------|--------------------|---------|--------------------------------------------------------------------------------------------------------------------------------------------------------------------------------|----------|-------------------------------------|------|------|----------------------------------------------------------------------------------------------------|--------------------------------------------------------------------------------------------------------------------------------------------------------------------------------------------------------------------------------------------------------------------------------------------------------------------------------------------------------------------------------------------------------------------------------------------------------------------------------------------------------------------------------------------------------------------------------------------------------------------------------------------------------------------------------|--------------------------------------------------------------------------------------------------------------------------------------------------------------------------------------------------------------------------------------------------------------------------------------------------|----------------------------------------------------------------------------------------------------------------------------------------------------------------------------------------------------------------------------------------------------------------------------------------------------------------------------------------------------------------------------------------------------------------------------------------------------------------------------------------------------------------------------------------------------|
| 214048_at | AI913365 | MBD4 | Homo sapiens | 6-Oct-14 | Consensus sequence | GenBank | Consensus includes<br>gb:AI913365<br>/FEA=EST<br>/DB_XREF=gi:5633220<br>/DB_XREF=est:wa11d06.x1<br>/CLONE=IMAGE:2297771<br>/UG=Hs.35947<br>methyl-CpG binding domain protein 4 | AI913365 | methyl-CpG binding domain protein 4 | MBD4 | 8930 | NM_001276270<br>///<br>NM_001276271<br>///<br>NM_001276272<br>///<br>NM_001276273<br>/// NM_003925 | 0000737 // DNA catabolic process, endonucleolytic<br>// traceable author statement /// 0006281 // DNA repair // traceable author statement /// 0006284 // base-excision repair // traceable author statement /// 0006285 // base-excision repair, AP site formation // traceable author statement /// 0006974 // cellular response to DNA damage stimulus // inferred from electronic annotation /// 0007095 // mitotic G2 DNA damage checkpoint // inferred from electronic annotation /// 0008630 // intrinsic apoptotic signaling pathway in response to DNA damage // inferred from electronic annotation /// 0009314 // response to radiation // inferred from electronic | 0000785 // chromatin // inferred from electronic annotation /// 0005634 // nucleus // inferred from direct assay /// 0005654 // nucleoplasm // traceable author statement /// 0005730 // nucleolus // inferred from direct assay /// 0005737 // cytoplasm // inferred from electronic annotation | 0003677 // DNA binding // inferred from electronic annotation /// 0003696 // satellite DNA binding // traceable author statement /// 0003824 // catalytic activity // inferred from electronic annotation /// 0004520 // endodeoxyribonuclease activity // traceable author statement /// 0005515 // protein binding // inferred from physical interaction /// 0008263 // pyrimidine-specific mismatch base pair DNA N-glycosylase activity // inferred from direct assay /// 0016787 // hydrolase activity // inferred from electronic annotation |
|-----------|----------|------|--------------|----------|--------------------|---------|--------------------------------------------------------------------------------------------------------------------------------------------------------------------------------|----------|-------------------------------------|------|------|----------------------------------------------------------------------------------------------------|--------------------------------------------------------------------------------------------------------------------------------------------------------------------------------------------------------------------------------------------------------------------------------------------------------------------------------------------------------------------------------------------------------------------------------------------------------------------------------------------------------------------------------------------------------------------------------------------------------------------------------------------------------------------------------|--------------------------------------------------------------------------------------------------------------------------------------------------------------------------------------------------------------------------------------------------------------------------------------------------|----------------------------------------------------------------------------------------------------------------------------------------------------------------------------------------------------------------------------------------------------------------------------------------------------------------------------------------------------------------------------------------------------------------------------------------------------------------------------------------------------------------------------------------------------|

|             |          |        |              |          |                    |         |                                                                                                                                                                                       |          |                                                    |        |      |                                                                                                                                                                                                                                                                            |                                                                                                                                                                                                                                                                                                                                                                                                                                      |                                                                                                                                                                                                                                                                       |                                                                                                                                      |
|-------------|----------|--------|--------------|----------|--------------------|---------|---------------------------------------------------------------------------------------------------------------------------------------------------------------------------------------|----------|----------------------------------------------------|--------|------|----------------------------------------------------------------------------------------------------------------------------------------------------------------------------------------------------------------------------------------------------------------------------|--------------------------------------------------------------------------------------------------------------------------------------------------------------------------------------------------------------------------------------------------------------------------------------------------------------------------------------------------------------------------------------------------------------------------------------|-----------------------------------------------------------------------------------------------------------------------------------------------------------------------------------------------------------------------------------------------------------------------|--------------------------------------------------------------------------------------------------------------------------------------|
| 214201_x_at | AA742237 | PRRC2A | Homo sapiens | 6-Oct-14 | Consensus sequence | GenBank | Consensus includes<br>gb:AA742237<br>/FEA=EST<br>/DB_XREF=gi:2784237<br>/DB_XREF=est:ny80a09.s1<br>/CLONE=IMAGE:1284568<br>/UG=Hs.25911<br>HLA-B associated transcript-2              | AA742237 | proline-rich coiled-coil 2A                        | PRRC2A | 7916 | NM_004638 ///<br>NM_080686 ///<br>XM_006715191 ///<br>XM_006725507 ///<br>XM_006725508 ///<br>XM_006725723 ///<br>XM_006725724 ///<br>XM_006725833 ///<br>XM_006725834 ///<br>XM_006725922 ///<br>XM_006726023 ///<br>XM_006726024 ///<br>XM_006726111 ///<br>XM_006726112 |                                                                                                                                                                                                                                                                                                                                                                                                                                      | 0005634 // nucleus // inferred from electronic annotation ///<br>0005737 // cytoplasm // inferred from electronic annotation ///<br>0016020 // membrane // inferred from direct assay ///<br>0070062 // extracellular vesicular exosome // inferred from direct assay | 0005515 // protein binding // inferred from physical interaction ///<br>0044822 // poly(A) RNA binding // inferred from direct assay |
| 214273_x_at | AV704353 | NPRL3  | Homo sapiens | 6-Oct-14 | Consensus sequence | GenBank | Consensus includes<br>gb:AV704353<br>/FEA=EST<br>/DB_XREF=gi:10721671<br>/DB_XREF=est:AV704353<br>/CLONE=ADBCNG09<br>/UG=Hs.19699<br>Conserved gene telomeric to alpha globin cluster | AV704353 | nitrogen permease regulator-like 3 (S. cerevisiae) | NPRL3  | 8131 | NM_001039476 ///<br>NM_001077350 ///<br>NM_001243247 ///<br>NM_001243248 ///<br>NM_001243249 ///<br>NM_012075                                                                                                                                                              | 0003281 // ventricular septum development // inferred from electronic annotation ///<br>0035909 // aorta morphogenesis // inferred from electronic annotation ///<br>0043547 // positive regulation of GTPase activity // inferred from electronic annotation ///<br>0048738 // cardiac muscle tissue development // inferred from electronic annotation ///<br>0060021 // palate development // inferred from electronic annotation | 0005096 // GTPase activator activity // inferred from electronic annotation                                                                                                                                                                                           |                                                                                                                                      |

|           |           |      |              |          |                    |         |                                                                                                                                                                                           |           |                                 |               |               |                         |                                                                                                                                                                                                                                                                                                     |                                                                                                                                                                                                                                                                                  |                                                                  |
|-----------|-----------|------|--------------|----------|--------------------|---------|-------------------------------------------------------------------------------------------------------------------------------------------------------------------------------------------|-----------|---------------------------------|---------------|---------------|-------------------------|-----------------------------------------------------------------------------------------------------------------------------------------------------------------------------------------------------------------------------------------------------------------------------------------------------|----------------------------------------------------------------------------------------------------------------------------------------------------------------------------------------------------------------------------------------------------------------------------------|------------------------------------------------------------------|
| 214465_at | NM_000608 | ORM1 | Homo sapiens | 6-Oct-14 | Consensus sequence | GenBank | Consensus includes gb:NM_000608.1 /DEF=Homo sapiens orosomuroid 2 (ORM2), mRNA. /FEA=CDS /GEN=ORM2 /PROD=orosomuroid 2 /DB_XREF=gi:4505528 /UG=Hs.278388 orosomuroid 2 /FL=gb:NM_000608.1 | NM_000608 | orosomuroid 1 /// orosomuroid 2 | ORM1 /// ORM2 | 5004 /// 5005 | NM_000607 /// NM_000608 | 0002682 // regulation of immune system process // inferred from electronic annotation /// 0006810 // transport // inferred from electronic annotation /// 0006953 // acute-phase response // inferred from electronic annotation /// 0006954 // inflammatory response // traceable author statement | 0005576 // extracellular region // non-traceable author statement /// 0005615 // extracellular space // inferred from direct assay /// 0070062 // extracellular vesicular exosome // inferred from direct assay /// 0072562 // blood microparticle // inferred from direct assay | 0005515 // protein binding // inferred from physical interaction |
|-----------|-----------|------|--------------|----------|--------------------|---------|-------------------------------------------------------------------------------------------------------------------------------------------------------------------------------------------|-----------|---------------------------------|---------------|---------------|-------------------------|-----------------------------------------------------------------------------------------------------------------------------------------------------------------------------------------------------------------------------------------------------------------------------------------------------|----------------------------------------------------------------------------------------------------------------------------------------------------------------------------------------------------------------------------------------------------------------------------------|------------------------------------------------------------------|



|             |           |       |              |          |                    |         |                                                                                                                                                                                                                                                                                                                       |           |                                                                                                          |                    |                 |                         |  |                                                                                                                                         |  |
|-------------|-----------|-------|--------------|----------|--------------------|---------|-----------------------------------------------------------------------------------------------------------------------------------------------------------------------------------------------------------------------------------------------------------------------------------------------------------------------|-----------|----------------------------------------------------------------------------------------------------------|--------------------|-----------------|-------------------------|--|-----------------------------------------------------------------------------------------------------------------------------------------|--|
| 214565_s_at | NM_012390 | SMR3A | Homo sapiens | 6-Oct-14 | Consensus sequence | GenBank | Consensus includes gb:NM_012390.1 /DEF=Homo sapiens protein homologous to salivary proline-rich protein P-B (PBI), mRNA. /FEA=CDS /GEN=PBI /PROD=protein homologous to salivary proline-rich protein P-B /DB_XREF=gi:6912577 /UG=Hs.166099 protein homologous to salivary proline-rich protein P-B /FL=gb:NM_012390.1 | NM_012390 | submaxillary gland androgen regulated protein 3A<br>/// submaxillary gland androgen regulated protein 3B | SMR3A<br>/// SMR3B | 10879 /// 26952 | NM_006685 /// NM_012390 |  | 0005576 // extracellular region // inferred from electronic annotation /// 0005615 // extracellular space // traceable author statement |  |
|-------------|-----------|-------|--------------|----------|--------------------|---------|-----------------------------------------------------------------------------------------------------------------------------------------------------------------------------------------------------------------------------------------------------------------------------------------------------------------------|-----------|----------------------------------------------------------------------------------------------------------|--------------------|-----------------|-------------------------|--|-----------------------------------------------------------------------------------------------------------------------------------------|--|

|             |           |        |              |          |                    |         |                                                                                                                                                                                                                                                                                                                       |           |                                                  |        |       |                                                                                                                                                    |                                                                                                                                                                                                                                              |                                                                                                                               |                                                                                                                                                                                                                  |
|-------------|-----------|--------|--------------|----------|--------------------|---------|-----------------------------------------------------------------------------------------------------------------------------------------------------------------------------------------------------------------------------------------------------------------------------------------------------------------------|-----------|--------------------------------------------------|--------|-------|----------------------------------------------------------------------------------------------------------------------------------------------------|----------------------------------------------------------------------------------------------------------------------------------------------------------------------------------------------------------------------------------------------|-------------------------------------------------------------------------------------------------------------------------------|------------------------------------------------------------------------------------------------------------------------------------------------------------------------------------------------------------------|
| 214566_at   | NM_012390 | SMR3A  | Homo sapiens | 6-Oct-14 | Consensus sequence | GenBank | Consensus includes gb:NM_012390.1 /DEF=Homo sapiens protein homologous to salivary proline-rich protein P-B (PBI), mRNA. /FEA=CDS /GEN=PBI /PROD=protein homologous to salivary proline-rich protein P-B /DB_XREF=gi:6912577 /UG=Hs.166099 protein homologous to salivary proline-rich protein P-B /FL=gb:NM_012390.1 | NM_012390 | submaxillary gland androgen regulated protein 3A | SMR3A  | 26952 | NM_012390                                                                                                                                          |                                                                                                                                                                                                                                              | 0005576 // extracellular region // inferred from electronic annotation                                                        |                                                                                                                                                                                                                  |
| 214715_x_at | AK024789  | ZNF160 | Homo sapiens | 6-Oct-14 | Consensus sequence | GenBank | Consensus includes gb:AK024789.1 /DEF=Homo sapiens cDNA: FLJ21136 fis, clone CAS07469. /FEA=mRNA /DB_XREF=gi:10437175 /UG=Hs.206882 Homo sapiens mRNA for FLJ00032 protein, partial cds                                                                                                                               | AK024789  | zinc finger protein 160                          | ZNF160 | 90338 | NM_001102603<br>/// NM_033288<br>/// NM_198893<br>/// XM_005259378<br>/// XM_005259379<br>/// XM_005259380<br>/// XM_006723461<br>/// XM_006723462 | 0006351 // transcription, DNA-templated // inferred from electronic annotation /// 0006355 // regulation of transcription, DNA-templated // inferred from electronic annotation /// 0030097 // hemopoiesis // non-traceable author statement | 0005622 // intracellular // inferred from electronic annotation /// 0005634 // nucleus // inferred from electronic annotation | 0003676 // nucleic acid binding // inferred from electronic annotation /// 0003677 // DNA binding // inferred from electronic annotation /// 0046872 // metal ion binding // inferred from electronic annotation |

|           |          |       |              |          |                    |         |                                                                                                                                                                                   |          |                                                     |       |       |                                                                       |                                                                                                                                                                                                                                                                                                                                                                                                                                                                                                                                                                      |                                                                                                                                                                          |                                                                                                                                                                                                                                                                                                                                                                                                                                                                                                                                                                    |
|-----------|----------|-------|--------------|----------|--------------------|---------|-----------------------------------------------------------------------------------------------------------------------------------------------------------------------------------|----------|-----------------------------------------------------|-------|-------|-----------------------------------------------------------------------|----------------------------------------------------------------------------------------------------------------------------------------------------------------------------------------------------------------------------------------------------------------------------------------------------------------------------------------------------------------------------------------------------------------------------------------------------------------------------------------------------------------------------------------------------------------------|--------------------------------------------------------------------------------------------------------------------------------------------------------------------------|--------------------------------------------------------------------------------------------------------------------------------------------------------------------------------------------------------------------------------------------------------------------------------------------------------------------------------------------------------------------------------------------------------------------------------------------------------------------------------------------------------------------------------------------------------------------|
| 214764_at | AW029169 | RRP15 | Homo sapiens | 6-Oct-14 | Consensus sequence | GenBank | Consensus includes<br>gb:AW029169<br>/FEA=EST<br>/DB_XREF=gi:5887925<br>/DB_XREF=est:wx06g01.x1<br>/CLONE=IMAGE:2542896<br>/UG=Hs.158241 KIAA0507 protein                         | AW029169 | ribosomal RNA processing 15 homolog (S. cerevisiae) | RRP15 | 51018 | NM_016052                                                             |                                                                                                                                                                                                                                                                                                                                                                                                                                                                                                                                                                      | 0005634 // nucleus // inferred from direct assay<br>/// 0005730 // nucleolus // inferred from direct assay<br>/// 0005739 // mitochondrion // inferred from direct assay |                                                                                                                                                                                                                                                                                                                                                                                                                                                                                                                                                                    |
| 214865_at | AC004490 | DOT1L | Homo sapiens | 6-Oct-14 | Consensus sequence | GenBank | Consensus includes<br>gb:AC004490<br>/DEF=Homo sapiens chromosome 19, cosmid R29381<br>/FEA=CDS<br>/DB_XREF=gi:2995576<br>/UG=Hs.156015 Homo sapiens chromosome 19, cosmid R29381 | AC004490 | DOT1-like histone H3K79 methyltransferase           | DOT1L | 84444 | NM_032482 ///<br>XM_005259659 ///<br>XM_005259660 ///<br>XM_006722923 | 0016568 // chromatin modification // inferred from electronic annotation /// 0016571 // histone methylation // inferred from electronic annotation /// 0032259 // methylation // inferred from electronic annotation /// 0034968 // histone lysine methylation // inferred from direct assay /// 0034968 // histone lysine methylation // inferred from electronic annotation /// 0046425 // regulation of JAK-STAT cascade // inferred from direct assay /// 2000677 // regulation of transcription regulatory region DNA binding // inferred from mutant phenotype | 0005634 // nucleus // inferred from electronic annotation                                                                                                                | 0003677 // DNA binding // inferred from electronic annotation /// 0005515 // protein binding // inferred from physical interaction /// 0008134 // transcription factor binding // inferred from physical interaction /// 0008168 // methyltransferase activity // inferred from electronic annotation /// 0016740 // transferase activity // inferred from electronic annotation /// 0018024 // histone-lysine N-methyltransferase activity // inferred from direct assay /// 0042054 // histone methyltransferase activity // inferred from electronic annotation |

|           |          |      |              |          |                    |         |                                                                                                                                                  |          |                         |      |       |           |                                                                                                                                                                                                                                                                                                                                                                                                                                                                                                                                                                                                                              |                                                                                                                                                                                                                                                                                                                                                                                           |                                                                                                                                                                                                                                                                                                                                                                                                                                                                                                                                                                                                                                                                                                                                    |
|-----------|----------|------|--------------|----------|--------------------|---------|--------------------------------------------------------------------------------------------------------------------------------------------------|----------|-------------------------|------|-------|-----------|------------------------------------------------------------------------------------------------------------------------------------------------------------------------------------------------------------------------------------------------------------------------------------------------------------------------------------------------------------------------------------------------------------------------------------------------------------------------------------------------------------------------------------------------------------------------------------------------------------------------------|-------------------------------------------------------------------------------------------------------------------------------------------------------------------------------------------------------------------------------------------------------------------------------------------------------------------------------------------------------------------------------------------|------------------------------------------------------------------------------------------------------------------------------------------------------------------------------------------------------------------------------------------------------------------------------------------------------------------------------------------------------------------------------------------------------------------------------------------------------------------------------------------------------------------------------------------------------------------------------------------------------------------------------------------------------------------------------------------------------------------------------------|
| 214956_at | AF090101 | AAK1 | Homo sapiens | 6-Oct-14 | Consensus sequence | GenBank | Consensus includes gb:AF090101.1 /DEF=Homo sapiens clone IMAGE 30714. /FEA=mRNA /DB_XREF=gi:4063636 /UG=Hs.177837 Homo sapiens clone IMAGE 30714 | AF090101 | AP2 associated kinase 1 | AAK1 | 22848 | NM_014911 | 0006468 // protein phosphorylation // inferred from direct assay /// 0006897 // endocytosis // inferred from electronic annotation /// 0016310 // phosphorylation // inferred from electronic annotation /// 0032880 // regulation of protein localization // inferred from direct assay /// 0045747 // positive regulation of Notch signaling pathway // inferred from direct assay /// 0046777 // protein autophosphorylation // inferred from sequence or structural similarity /// 0050821 // protein stabilization // inferred from direct assay /// 2000369 // regulation of clathrin-mediated endocytosis // inferred | 0005886 // plasma membrane // inferred from electronic annotation /// 0005905 // coated pit // inferred from electronic annotation /// 0016020 // membrane // inferred from electronic annotation /// 0019897 // extrinsic component of plasma membrane // inferred from sequence or structural similarity /// 0030136 // clathrin-coated vesicle // inferred from sequence or structural | 0000166 // nucleotide binding // inferred from electronic annotation /// 0004672 // protein kinase activity // inferred from electronic annotation /// 0004674 // protein serine/threonine kinase activity // inferred from sequence or structural similarity /// 0004713 // protein tyrosine kinase activity // inferred from electronic annotation /// 0005112 // Notch binding // inferred from direct assay /// 0005515 // protein binding // inferred from physical interaction /// 0005524 // ATP binding // inferred from electronic annotation /// 0016301 // kinase activity // inferred from electronic annotation /// 0016740 // transferase activity // inferred from electronic annotation /// 0016772 // transferase |
|-----------|----------|------|--------------|----------|--------------------|---------|--------------------------------------------------------------------------------------------------------------------------------------------------|----------|-------------------------|------|-------|-----------|------------------------------------------------------------------------------------------------------------------------------------------------------------------------------------------------------------------------------------------------------------------------------------------------------------------------------------------------------------------------------------------------------------------------------------------------------------------------------------------------------------------------------------------------------------------------------------------------------------------------------|-------------------------------------------------------------------------------------------------------------------------------------------------------------------------------------------------------------------------------------------------------------------------------------------------------------------------------------------------------------------------------------------|------------------------------------------------------------------------------------------------------------------------------------------------------------------------------------------------------------------------------------------------------------------------------------------------------------------------------------------------------------------------------------------------------------------------------------------------------------------------------------------------------------------------------------------------------------------------------------------------------------------------------------------------------------------------------------------------------------------------------------|

|           |          |      |              |          |                    |         |                                                                                                                                                  |          |                         |      |       |           |                                                                                                                                                                                                                                                                                                                                                                                                                                                                                                                                                                                                                              |                                                                                                                                                                                                                                                                                                                                                                                           |                                                                                                                                                                                                                                                                                                                                                                                                                                                                                                                                                                                                                                                                                                                                    |
|-----------|----------|------|--------------|----------|--------------------|---------|--------------------------------------------------------------------------------------------------------------------------------------------------|----------|-------------------------|------|-------|-----------|------------------------------------------------------------------------------------------------------------------------------------------------------------------------------------------------------------------------------------------------------------------------------------------------------------------------------------------------------------------------------------------------------------------------------------------------------------------------------------------------------------------------------------------------------------------------------------------------------------------------------|-------------------------------------------------------------------------------------------------------------------------------------------------------------------------------------------------------------------------------------------------------------------------------------------------------------------------------------------------------------------------------------------|------------------------------------------------------------------------------------------------------------------------------------------------------------------------------------------------------------------------------------------------------------------------------------------------------------------------------------------------------------------------------------------------------------------------------------------------------------------------------------------------------------------------------------------------------------------------------------------------------------------------------------------------------------------------------------------------------------------------------------|
| 214998_at | AF090100 | AAK1 | Homo sapiens | 6-Oct-14 | Consensus sequence | GenBank | Consensus includes gb:AF090100.1 /DEF=Homo sapiens clone IMAGE 23915. /FEA=mRNA /DB_XREF=gi:4063635 /UG=Hs.170241 Homo sapiens clone IMAGE 23915 | AF090100 | AP2 associated kinase 1 | AAK1 | 22848 | NM_014911 | 0006468 // protein phosphorylation // inferred from direct assay /// 0006897 // endocytosis // inferred from electronic annotation /// 0016310 // phosphorylation // inferred from electronic annotation /// 0032880 // regulation of protein localization // inferred from direct assay /// 0045747 // positive regulation of Notch signaling pathway // inferred from direct assay /// 0046777 // protein autophosphorylation // inferred from sequence or structural similarity /// 0050821 // protein stabilization // inferred from direct assay /// 2000369 // regulation of clathrin-mediated endocytosis // inferred | 0005886 // plasma membrane // inferred from electronic annotation /// 0005905 // coated pit // inferred from electronic annotation /// 0016020 // membrane // inferred from electronic annotation /// 0019897 // extrinsic component of plasma membrane // inferred from sequence or structural similarity /// 0030136 // clathrin-coated vesicle // inferred from sequence or structural | 0000166 // nucleotide binding // inferred from electronic annotation /// 0004672 // protein kinase activity // inferred from electronic annotation /// 0004674 // protein serine/threonine kinase activity // inferred from sequence or structural similarity /// 0004713 // protein tyrosine kinase activity // inferred from electronic annotation /// 0005112 // Notch binding // inferred from direct assay /// 0005515 // protein binding // inferred from physical interaction /// 0005524 // ATP binding // inferred from electronic annotation /// 0016301 // kinase activity // inferred from electronic annotation /// 0016740 // transferase activity // inferred from electronic annotation /// 0016772 // transferase |
|-----------|----------|------|--------------|----------|--------------------|---------|--------------------------------------------------------------------------------------------------------------------------------------------------|----------|-------------------------|------|-------|-----------|------------------------------------------------------------------------------------------------------------------------------------------------------------------------------------------------------------------------------------------------------------------------------------------------------------------------------------------------------------------------------------------------------------------------------------------------------------------------------------------------------------------------------------------------------------------------------------------------------------------------------|-------------------------------------------------------------------------------------------------------------------------------------------------------------------------------------------------------------------------------------------------------------------------------------------------------------------------------------------------------------------------------------------|------------------------------------------------------------------------------------------------------------------------------------------------------------------------------------------------------------------------------------------------------------------------------------------------------------------------------------------------------------------------------------------------------------------------------------------------------------------------------------------------------------------------------------------------------------------------------------------------------------------------------------------------------------------------------------------------------------------------------------|

|             |          |       |              |          |                    |         |                                                                                                                                                                                                                                                                                                                      |          |                            |       |       |                                                                                                                                                                                                                                                                                   |                                                                                                                                                                                                                                                                                                                                                                                                                                                  |                                                                                                                                                                                           |                                                                                                                                                                                                                                                                                                                                                                                                               |
|-------------|----------|-------|--------------|----------|--------------------|---------|----------------------------------------------------------------------------------------------------------------------------------------------------------------------------------------------------------------------------------------------------------------------------------------------------------------------|----------|----------------------------|-------|-------|-----------------------------------------------------------------------------------------------------------------------------------------------------------------------------------------------------------------------------------------------------------------------------------|--------------------------------------------------------------------------------------------------------------------------------------------------------------------------------------------------------------------------------------------------------------------------------------------------------------------------------------------------------------------------------------------------------------------------------------------------|-------------------------------------------------------------------------------------------------------------------------------------------------------------------------------------------|---------------------------------------------------------------------------------------------------------------------------------------------------------------------------------------------------------------------------------------------------------------------------------------------------------------------------------------------------------------------------------------------------------------|
| 215041_s_at | BE259050 | DOCK9 | Homo sapiens | 6-Oct-14 | Consensus sequence | GenBank | Consensus includes gb:BE259050 /FEA=EST /DB_XREF=gi:9129548 /DB_XREF=est:601110055F1 /CLONE=IMAGE:3350965 /UG=Hs.307137 Human DNA sequence from clone RP11-155N3 on chromosome 13 Contains ESTs, STSs and GSSs. Contains the 3 part of a novel gene similar to KIAA0694, the KIAA1058 gene and a putative novel gene | BE259050 | dedicator of cytokinesis 9 | DOCK9 | 23348 | NM_001130048 ///<br>NM_001130049 ///<br>NM_001130050 ///<br>NM_015296 ///<br>XM_005254034 ///<br>XM_005254035 ///<br>XM_005254036 ///<br>XM_006719922 ///<br>XM_006719923 ///<br>XM_006719924 ///<br>XM_006719925 ///<br>XM_006719926 ///<br>XM_006719927 ///<br>XM_006719928 /// | 0007264 // small GTPase mediated signal transduction // inferred from electronic annotation /// 0007596 // blood coagulation // traceable author statement /// 0032319 // regulation of Rho GTPase activity // inferred from electronic annotation /// 0032321 // positive regulation of Rho GTPase activity // inferred from electronic annotation /// 0043547 // positive regulation of GTPase activity // inferred from electronic annotation | 0005829 // cytosol // traceable author statement /// 0012505 // endomembrane system // inferred from electronic annotation /// 0016020 // membrane // inferred from electronic annotation | 0005085 // guanyl-nucleotide exchange factor activity // inferred from electronic annotation /// 0005089 // Rho guanyl-nucleotide exchange factor activity // inferred from electronic annotation /// 0005488 // binding // inferred from electronic annotation /// 0005515 // protein binding // inferred from physical interaction /// 0017048 // Rho GTPase binding // inferred from electronic annotation |
|-------------|----------|-------|--------------|----------|--------------------|---------|----------------------------------------------------------------------------------------------------------------------------------------------------------------------------------------------------------------------------------------------------------------------------------------------------------------------|----------|----------------------------|-------|-------|-----------------------------------------------------------------------------------------------------------------------------------------------------------------------------------------------------------------------------------------------------------------------------------|--------------------------------------------------------------------------------------------------------------------------------------------------------------------------------------------------------------------------------------------------------------------------------------------------------------------------------------------------------------------------------------------------------------------------------------------------|-------------------------------------------------------------------------------------------------------------------------------------------------------------------------------------------|---------------------------------------------------------------------------------------------------------------------------------------------------------------------------------------------------------------------------------------------------------------------------------------------------------------------------------------------------------------------------------------------------------------|

|           |          |        |              |          |                    |         |                                                                                                                                                                                                                                  |          |                                |        |       |           |                                                                                                                                                                                                                                                                                                                                                                                                                                                                    |                                                                                                                                                                                                                                                                                                                                                       |                                                                                                                                                                                                                                                                                                                                                                                                       |
|-----------|----------|--------|--------------|----------|--------------------|---------|----------------------------------------------------------------------------------------------------------------------------------------------------------------------------------------------------------------------------------|----------|--------------------------------|--------|-------|-----------|--------------------------------------------------------------------------------------------------------------------------------------------------------------------------------------------------------------------------------------------------------------------------------------------------------------------------------------------------------------------------------------------------------------------------------------------------------------------|-------------------------------------------------------------------------------------------------------------------------------------------------------------------------------------------------------------------------------------------------------------------------------------------------------------------------------------------------------|-------------------------------------------------------------------------------------------------------------------------------------------------------------------------------------------------------------------------------------------------------------------------------------------------------------------------------------------------------------------------------------------------------|
| 215047_at | AL080170 | TRIM58 | Homo sapiens | 6-Oct-14 | Consensus sequence | GenBank | Consensus includes gb:AL080170.1 /DEF=Homo sapiens mRNA; cDNA DKFZp434C091 (from clone DKFZp434C091) ; partial cds. /FEA=mRNA /GEN=DKFZp434C091 /PROD=hypothetical protein /DB_XREF=gi:5262639 /UG=Hs.51692 DKFZP434C091 protein | AL080170 | tripartite motif containing 58 | TRIM58 | 25893 | NM_015431 | 0007165 // signal transduction // inferred from electronic annotation /// 0007186 // G-protein coupled receptor signaling pathway // inferred from electronic annotation /// 0007608 // sensory perception of smell // inferred from electronic annotation /// 0050896 // response to stimulus // inferred from electronic annotation /// 0050911 // detection of chemical stimulus involved in sensory perception of smell // inferred from electronic annotation | 0005622 // intracellular // inferred from electronic annotation /// 0005886 // plasma membrane // inferred from electronic annotation /// 005886 // plasma membrane // traceable author statement /// 0016020 // membrane // inferred from electronic annotation /// 0016021 // integral component of membrane // inferred from electronic annotation | 0004871 // signal transducer activity // inferred from electronic annotation /// 0004930 // G-protein coupled receptor activity // inferred from electronic annotation /// 0004984 // olfactory receptor activity // inferred from electronic annotation /// 0005515 // protein binding // inferred from electronic annotation /// 0008270 // zinc ion binding // inferred from electronic annotation |
|-----------|----------|--------|--------------|----------|--------------------|---------|----------------------------------------------------------------------------------------------------------------------------------------------------------------------------------------------------------------------------------|----------|--------------------------------|--------|-------|-----------|--------------------------------------------------------------------------------------------------------------------------------------------------------------------------------------------------------------------------------------------------------------------------------------------------------------------------------------------------------------------------------------------------------------------------------------------------------------------|-------------------------------------------------------------------------------------------------------------------------------------------------------------------------------------------------------------------------------------------------------------------------------------------------------------------------------------------------------|-------------------------------------------------------------------------------------------------------------------------------------------------------------------------------------------------------------------------------------------------------------------------------------------------------------------------------------------------------------------------------------------------------|

|           |          |          |              |          |                    |         |                                                                                                                                                                                                                   |          |                                                 |           |      |                                                                                                                                                                                                                                            |                                                                                                                                                                                                                                                                                                                                                                                                                                                                                                                                                                                                                                                                    |                                                                                                              |                                                                                                                                                                                                                                                                                                                                    |
|-----------|----------|----------|--------------|----------|--------------------|---------|-------------------------------------------------------------------------------------------------------------------------------------------------------------------------------------------------------------------|----------|-------------------------------------------------|-----------|------|--------------------------------------------------------------------------------------------------------------------------------------------------------------------------------------------------------------------------------------------|--------------------------------------------------------------------------------------------------------------------------------------------------------------------------------------------------------------------------------------------------------------------------------------------------------------------------------------------------------------------------------------------------------------------------------------------------------------------------------------------------------------------------------------------------------------------------------------------------------------------------------------------------------------------|--------------------------------------------------------------------------------------------------------------|------------------------------------------------------------------------------------------------------------------------------------------------------------------------------------------------------------------------------------------------------------------------------------------------------------------------------------|
| 215139_at | AL137508 | ARHGEF10 | Homo sapiens | 6-Oct-14 | Consensus sequence | GenBank | Consensus includes gb:AL137508.1 /DEF=Homo sapiens mRNA; cDNA DKFZp761P221 (from clone DKFZp761P221) . /FEA=mRNA /DB_XREF=gi:6808163 /UG=Hs.224403 Homo sapiens mRNA; cDNA DKFZp761P221 (from clone DKFZp761P221) | AL137508 | Rho guanine nucleotide exchange factor (GEF) 10 | ARHGEF 10 | 9639 | NM_014629 /// XM_005266039 /// XM_005266040 /// XM_005266041 /// XM_005266042 /// XM_006716238 /// XM_006716239 /// XM_006716240 /// XM_006716241 /// XM_006725104 /// XM_006725105 /// XM_006725106 /// XM_006725107 /// XM_006725108 /// | 0022011 // myelination in peripheral nervous system // inferred from mutant phenotype /// 0032319 // regulation of Rho GTPase activity // inferred from direct assay /// 0032319 // regulation of Rho GTPase activity // inferred from electronic annotation /// 0032321 // positive regulation of Rho GTPase activity // inferred from direct assay /// 0032321 // positive regulation of Rho GTPase activity // inferred from electronic annotation /// 0033126 // positive regulation of GTP catabolic process // inferred from direct assay /// 0035023 // regulation of Rho protein signal transduction // inferred from electronic annotation /// 0043547 // | 0005813 // centrosome // inferred from direct assay /// 0005829 // cytosol // non-traceable author statement | 0005085 // guanyl-nucleotide exchange factor activity // inferred from electronic annotation /// 0005089 // Rho guanyl-nucleotide exchange factor activity // inferred from direct assay /// 0005515 // protein binding // inferred from physical interaction /// 0019894 // kinesin binding // inferred from physical interaction |
|-----------|----------|----------|--------------|----------|--------------------|---------|-------------------------------------------------------------------------------------------------------------------------------------------------------------------------------------------------------------------|----------|-------------------------------------------------|-----------|------|--------------------------------------------------------------------------------------------------------------------------------------------------------------------------------------------------------------------------------------------|--------------------------------------------------------------------------------------------------------------------------------------------------------------------------------------------------------------------------------------------------------------------------------------------------------------------------------------------------------------------------------------------------------------------------------------------------------------------------------------------------------------------------------------------------------------------------------------------------------------------------------------------------------------------|--------------------------------------------------------------------------------------------------------------|------------------------------------------------------------------------------------------------------------------------------------------------------------------------------------------------------------------------------------------------------------------------------------------------------------------------------------|



|           |          |     |              |          |                    |         |                                                                                                                                                                                          |          |                                                   |     |      |                                                                                                                                                                                                |                                                                                                                                                                                                                                                                                                                                                                                                                                                                                                                                                                                                                           |                                                                                                                              |                                                                                                                                                                                                                                                                                                                                                                                                                                                                                                                                                                                                                                                                     |
|-----------|----------|-----|--------------|----------|--------------------|---------|------------------------------------------------------------------------------------------------------------------------------------------------------------------------------------------|----------|---------------------------------------------------|-----|------|------------------------------------------------------------------------------------------------------------------------------------------------------------------------------------------------|---------------------------------------------------------------------------------------------------------------------------------------------------------------------------------------------------------------------------------------------------------------------------------------------------------------------------------------------------------------------------------------------------------------------------------------------------------------------------------------------------------------------------------------------------------------------------------------------------------------------------|------------------------------------------------------------------------------------------------------------------------------|---------------------------------------------------------------------------------------------------------------------------------------------------------------------------------------------------------------------------------------------------------------------------------------------------------------------------------------------------------------------------------------------------------------------------------------------------------------------------------------------------------------------------------------------------------------------------------------------------------------------------------------------------------------------|
| 215152_at | AI357042 | MYB | Homo sapiens | 6-Oct-14 | Consensus sequence | GenBank | Consensus includes<br>gb:AI357042<br>/FEA=EST<br>/DB_XREF=gi:4108663<br>/DB_XREF=est:qx62b04.x1<br>/CLONE=IMAGE:2005903<br>/UG=Hs.1334 v-myb avian myeloblastosis viral oncogene homolog | AI357042 | v-myb avian myeloblastosis viral oncogene homolog | MYB | 4602 | NM_001130172<br>///<br>NM_001130173<br>///<br>NM_001161656<br>///<br>NM_001161657<br>///<br>NM_001161658<br>///<br>NM_001161659<br>///<br>NM_001161660<br>/// NM_005375<br>///<br>XM_006715495 | 0000082 // G1/S transition of mitotic cell cycle // inferred from electronic annotation ///<br>0000122 // negative regulation of transcription from RNA polymerase II promoter // inferred from mutant phenotype ///<br>0001701 // in utero embryonic development // inferred from electronic annotation /// 0006260 // DNA replication // inferred from electronic annotation /// 0006338 // chromatin remodeling // inferred from mutant phenotype /// 0006351 // transcription, DNA-templated // inferred from electronic annotation /// 0006355 // regulation of transcription, DNA-templated // non-traceable author | 0005634 // nucleus // inferred from electronic annotation ///<br>0016363 // nuclear matrix // non-traceable author statement | 0000978 // RNA polymerase II core promoter proximal region sequence-specific DNA binding // inferred from direct assay /// 0001077 // RNA polymerase II core promoter proximal region sequence-specific DNA binding transcription factor activity involved in positive regulation of transcription // inferred by curator ///<br>0003677 // DNA binding // inferred from electronic annotation /// 0003682 // chromatin binding // inferred from electronic annotation ///<br>0003700 // sequence-specific DNA binding transcription factor activity // inferred from electronic annotation ///<br>0005515 // protein binding // inferred from physical interaction |
|-----------|----------|-----|--------------|----------|--------------------|---------|------------------------------------------------------------------------------------------------------------------------------------------------------------------------------------------|----------|---------------------------------------------------|-----|------|------------------------------------------------------------------------------------------------------------------------------------------------------------------------------------------------|---------------------------------------------------------------------------------------------------------------------------------------------------------------------------------------------------------------------------------------------------------------------------------------------------------------------------------------------------------------------------------------------------------------------------------------------------------------------------------------------------------------------------------------------------------------------------------------------------------------------------|------------------------------------------------------------------------------------------------------------------------------|---------------------------------------------------------------------------------------------------------------------------------------------------------------------------------------------------------------------------------------------------------------------------------------------------------------------------------------------------------------------------------------------------------------------------------------------------------------------------------------------------------------------------------------------------------------------------------------------------------------------------------------------------------------------|

|           |              |       |              |          |                    |         |                                                                                                                                                                        |          |                            |       |       |                                                                                                                                                                                                                                                                                                                          |                                                                                                                                                                                                                                                                                                                                                                                                                                                  |                                                                                                                                                                                           |                                                                                                                                                                                                                                                                                                                                                 |
|-----------|--------------|-------|--------------|----------|--------------------|---------|------------------------------------------------------------------------------------------------------------------------------------------------------------------------|----------|----------------------------|-------|-------|--------------------------------------------------------------------------------------------------------------------------------------------------------------------------------------------------------------------------------------------------------------------------------------------------------------------------|--------------------------------------------------------------------------------------------------------------------------------------------------------------------------------------------------------------------------------------------------------------------------------------------------------------------------------------------------------------------------------------------------------------------------------------------------|-------------------------------------------------------------------------------------------------------------------------------------------------------------------------------------------|-------------------------------------------------------------------------------------------------------------------------------------------------------------------------------------------------------------------------------------------------------------------------------------------------------------------------------------------------|
| 215237_at | AW45075<br>1 | DOCK9 | Homo sapiens | 6-Oct-14 | Consensus sequence | GenBank | Consensus includes<br>gb:AW450751<br>/FEA=EST<br>/DB_XREF=gi:6991527<br>/DB_XREF=est:UI-H-BI3-akq-f-11-0-UI.s1<br>/CLONE=IMAGE:2735372<br>/UG=Hs.8021 KIAA1058 protein | AW450751 | dedicator of cytokinesis 9 | DOCK9 | 23348 | NM_001130048<br>///<br>NM_001130049<br>///<br>NM_001130050<br>/// NM_015296<br>///<br>XM_005254034<br>///<br>XM_005254035<br>///<br>XM_005254036<br>///<br>XM_006719922<br>///<br>XM_006719923<br>///<br>XM_006719924<br>///<br>XM_006719925<br>///<br>XM_006719926<br>///<br>XM_006719927<br>///<br>XM_006719928<br>/// | 0007264 // small GTPase mediated signal transduction // inferred from electronic annotation /// 0007596 // blood coagulation // traceable author statement /// 0032319 // regulation of Rho GTPase activity // inferred from electronic annotation /// 0032321 // positive regulation of Rho GTPase activity // inferred from electronic annotation /// 0043547 // positive regulation of GTPase activity // inferred from electronic annotation | 0005829 // cytosol // traceable author statement /// 0012505 // endomembrane system // inferred from electronic annotation /// 0016020 // membrane // inferred from electronic annotation | 0005085 // guanyl-nucleotide exchange factor activity // inferred from electronic annotation /// 0005089 // Rho guanyl-nucleotide exchange factor activity // inferred from electronic annotation /// 0005515 // protein binding // inferred from physical interaction /// 0017048 // Rho GTPase binding // inferred from electronic annotation |
|-----------|--------------|-------|--------------|----------|--------------------|---------|------------------------------------------------------------------------------------------------------------------------------------------------------------------------|----------|----------------------------|-------|-------|--------------------------------------------------------------------------------------------------------------------------------------------------------------------------------------------------------------------------------------------------------------------------------------------------------------------------|--------------------------------------------------------------------------------------------------------------------------------------------------------------------------------------------------------------------------------------------------------------------------------------------------------------------------------------------------------------------------------------------------------------------------------------------------|-------------------------------------------------------------------------------------------------------------------------------------------------------------------------------------------|-------------------------------------------------------------------------------------------------------------------------------------------------------------------------------------------------------------------------------------------------------------------------------------------------------------------------------------------------|

|             |          |       |              |          |                    |         |                                                                                                                                                                        |          |                            |       |       |                                                                                                                                                                                                                                                                                                                             |                                                                                                                                                                                                                                                                                                                                                                                                                                                  |                                                                                                                                                                                           |                                                                                                                                                                                                                                                                                                                                                                                                               |
|-------------|----------|-------|--------------|----------|--------------------|---------|------------------------------------------------------------------------------------------------------------------------------------------------------------------------|----------|----------------------------|-------|-------|-----------------------------------------------------------------------------------------------------------------------------------------------------------------------------------------------------------------------------------------------------------------------------------------------------------------------------|--------------------------------------------------------------------------------------------------------------------------------------------------------------------------------------------------------------------------------------------------------------------------------------------------------------------------------------------------------------------------------------------------------------------------------------------------|-------------------------------------------------------------------------------------------------------------------------------------------------------------------------------------------|---------------------------------------------------------------------------------------------------------------------------------------------------------------------------------------------------------------------------------------------------------------------------------------------------------------------------------------------------------------------------------------------------------------|
| 215238_s_at | AW450751 | DOCK9 | Homo sapiens | 6-Oct-14 | Consensus sequence | GenBank | Consensus includes<br>gb:AW450751<br>/FEA=EST<br>/DB_XREF=gi:6991527<br>/DB_XREF=est:UI-H-BI3-akq-f-11-0-UI.s1<br>/CLONE=IMAGE:2735372<br>/UG=Hs.8021 KIAA1058 protein | AW450751 | dedicator of cytokinesis 9 | DOCK9 | 23348 | NM_001130048<br>///<br>NM_001130049<br>///<br>NM_001130050<br>///<br>NM_015296<br>///<br>XM_005254034<br>///<br>XM_005254035<br>///<br>XM_005254036<br>///<br>XM_006719922<br>///<br>XM_006719923<br>///<br>XM_006719924<br>///<br>XM_006719925<br>///<br>XM_006719926<br>///<br>XM_006719927<br>///<br>XM_006719928<br>/// | 0007264 // small GTPase mediated signal transduction // inferred from electronic annotation /// 0007596 // blood coagulation // traceable author statement /// 0032319 // regulation of Rho GTPase activity // inferred from electronic annotation /// 0032321 // positive regulation of Rho GTPase activity // inferred from electronic annotation /// 0043547 // positive regulation of GTPase activity // inferred from electronic annotation | 0005829 // cytosol // traceable author statement /// 0012505 // endomembrane system // inferred from electronic annotation /// 0016020 // membrane // inferred from electronic annotation | 0005085 // guanyl-nucleotide exchange factor activity // inferred from electronic annotation /// 0005089 // Rho guanyl-nucleotide exchange factor activity // inferred from electronic annotation /// 0005488 // binding // inferred from electronic annotation /// 0005515 // protein binding // inferred from physical interaction /// 0017048 // Rho GTPase binding // inferred from electronic annotation |
|-------------|----------|-------|--------------|----------|--------------------|---------|------------------------------------------------------------------------------------------------------------------------------------------------------------------------|----------|----------------------------|-------|-------|-----------------------------------------------------------------------------------------------------------------------------------------------------------------------------------------------------------------------------------------------------------------------------------------------------------------------------|--------------------------------------------------------------------------------------------------------------------------------------------------------------------------------------------------------------------------------------------------------------------------------------------------------------------------------------------------------------------------------------------------------------------------------------------------|-------------------------------------------------------------------------------------------------------------------------------------------------------------------------------------------|---------------------------------------------------------------------------------------------------------------------------------------------------------------------------------------------------------------------------------------------------------------------------------------------------------------------------------------------------------------------------------------------------------------|

|             |          |       |              |          |                    |         |                                                                                                                                                                                                                 |          |                                             |       |       |                                                                                                                                                       |                                                                                                                                                                                 |                                                                                                                              |                                                               |
|-------------|----------|-------|--------------|----------|--------------------|---------|-----------------------------------------------------------------------------------------------------------------------------------------------------------------------------------------------------------------|----------|---------------------------------------------|-------|-------|-------------------------------------------------------------------------------------------------------------------------------------------------------|---------------------------------------------------------------------------------------------------------------------------------------------------------------------------------|------------------------------------------------------------------------------------------------------------------------------|---------------------------------------------------------------|
| 215286_s_at | AL050389 | PHTF2 | Homo sapiens | 6-Oct-14 | Consensus sequence | GenBank | Consensus includes gb:AL050389.1 /DEF=Homo sapiens mRNA; cDNA DKFZp564F013 (from clone DKFZp564F013) . /FEA=mRNA /PROD=hypothetical protein /DB_XREF=gi:4914570 /UG=Hs.128653 hypothetical protein DKFZp564F013 | AL050389 | putative homeodomain transcription factor 2 | PHTF2 | 57157 | NM_001127357 ///<br>NM_001127358 ///<br>NM_001127359 ///<br>NM_001127360 ///<br>NM_020432 ///<br>XM_005250508 ///<br>XM_005250509 ///<br>XM_006716063 | 0006351 // transcription, DNA-templated // inferred from electronic annotation /// 0006355 // regulation of transcription, DNA-templated // inferred from electronic annotation | 0005634 // nucleus // inferred from electronic annotation /// 0005783 // endoplasmic reticulum // inferred from direct assay | 0003677 // DNA binding // inferred from electronic annotation |
|-------------|----------|-------|--------------|----------|--------------------|---------|-----------------------------------------------------------------------------------------------------------------------------------------------------------------------------------------------------------------|----------|---------------------------------------------|-------|-------|-------------------------------------------------------------------------------------------------------------------------------------------------------|---------------------------------------------------------------------------------------------------------------------------------------------------------------------------------|------------------------------------------------------------------------------------------------------------------------------|---------------------------------------------------------------|

|             |          |       |              |          |                    |         |                                                                                                                                                                        |          |                            |       |      |                                                                                                    |                                                                                                                                                                                                                                                                                                                                                                                                                                                                                                                                                              |                                                            |                                                                                                                                                                                                                                                                                                                                                                                                                                |
|-------------|----------|-------|--------------|----------|--------------------|---------|------------------------------------------------------------------------------------------------------------------------------------------------------------------------|----------|----------------------------|-------|------|----------------------------------------------------------------------------------------------------|--------------------------------------------------------------------------------------------------------------------------------------------------------------------------------------------------------------------------------------------------------------------------------------------------------------------------------------------------------------------------------------------------------------------------------------------------------------------------------------------------------------------------------------------------------------|------------------------------------------------------------|--------------------------------------------------------------------------------------------------------------------------------------------------------------------------------------------------------------------------------------------------------------------------------------------------------------------------------------------------------------------------------------------------------------------------------|
| 215438_x_at | BE906054 | GSPT1 | Homo sapiens | 6-Oct-14 | Consensus sequence | GenBank | Consensus includes<br>gb:BE906054<br>/FEA=EST<br>/DB_XREF=gj:10399395<br>/DB_XREF=est:601497073F1<br>/CLONE=IMAGE:3899034<br>/UG=Hs.2707<br>G1 to S phase transition 1 | BE906054 | G1 to S phase transition 1 | GSPT1 | 2935 | NM_001130006<br>///<br>NM_001130007<br>/// NM_002094<br>///<br>XM_005255274<br>///<br>XM_005255275 | 0000082 // G1/S transition of mitotic cell cycle // traceable author statement /// 0000184 // nuclear-transcribed mRNA catabolic process, nonsense-mediated decay // traceable author statement /// 0006184 // GTP catabolic process // inferred from electronic annotation /// 0006184 // GTP catabolic process // traceable author statement /// 0006412 // translation // inferred from electronic annotation /// 0006415 // translational termination // inferred from mutant phenotype /// 0006479 // protein methylation // inferred from direct assay | 0005622 // intracellular // non-traceable author statement | 0000166 // nucleotide binding // inferred from electronic annotation /// 0003747 // translation release factor activity // inferred from mutant phenotype /// 0003924 // GTPase activity // traceable author statement /// 0005515 // protein binding // inferred from physical interaction /// 0005525 // GTP binding // inferred from electronic annotation /// 0044822 // poly(A) RNA binding // inferred from direct assay |
|-------------|----------|-------|--------------|----------|--------------------|---------|------------------------------------------------------------------------------------------------------------------------------------------------------------------------|----------|----------------------------|-------|------|----------------------------------------------------------------------------------------------------|--------------------------------------------------------------------------------------------------------------------------------------------------------------------------------------------------------------------------------------------------------------------------------------------------------------------------------------------------------------------------------------------------------------------------------------------------------------------------------------------------------------------------------------------------------------|------------------------------------------------------------|--------------------------------------------------------------------------------------------------------------------------------------------------------------------------------------------------------------------------------------------------------------------------------------------------------------------------------------------------------------------------------------------------------------------------------|

|           |          |          |              |          |                    |         |                                                                                                                                                                                                                           |          |                                    |          |      |                                                                             |                                                                                                                                                                                                                                                                                                                                                                                                                                                                                                                                                                                                                                                    |                                                                                                                                                                                                                                                                                                                                                                                                        |                                                                                                                                                                                                                                                                                                                                                                                                                                                                                                                                                                                                                                                                                                                          |
|-----------|----------|----------|--------------|----------|--------------------|---------|---------------------------------------------------------------------------------------------------------------------------------------------------------------------------------------------------------------------------|----------|------------------------------------|----------|------|-----------------------------------------------------------------------------|----------------------------------------------------------------------------------------------------------------------------------------------------------------------------------------------------------------------------------------------------------------------------------------------------------------------------------------------------------------------------------------------------------------------------------------------------------------------------------------------------------------------------------------------------------------------------------------------------------------------------------------------------|--------------------------------------------------------------------------------------------------------------------------------------------------------------------------------------------------------------------------------------------------------------------------------------------------------------------------------------------------------------------------------------------------------|--------------------------------------------------------------------------------------------------------------------------------------------------------------------------------------------------------------------------------------------------------------------------------------------------------------------------------------------------------------------------------------------------------------------------------------------------------------------------------------------------------------------------------------------------------------------------------------------------------------------------------------------------------------------------------------------------------------------------|
| 215775_at | BF084105 | THBS1    | Homo sapiens | 6-Oct-14 | Consensus sequence | GenBank | Consensus includes<br>gb:BF084105<br>/FEA=EST<br>/DB_XREF=gi:10877935<br>/DB_XREF=est:QV4-CT0491-140900-398-e06<br>/UG=Hs.247954<br>Human thrombospondin-1 gene, partial cds                                              | BF084105 | thrombospondin 1                   | THBS1    | 7057 | NM_003246                                                                   | 0000187 // activation of MAPK activity // inferred from mutant phenotype /// 0001666 // response to hypoxia // non-traceable author statement /// 0001937 // negative regulation of endothelial cell proliferation // inferred from direct assay /// 0001937 // negative regulation of endothelial cell proliferation // inferred from mutant phenotype /// 0001953 // negative regulation of cell-matrix adhesion // inferred from direct assay /// 0002040 // sprouting angiogenesis // inferred from mutant phenotype /// 0002544 // chronic inflammatory response // inferred from expression pattern /// 0002576 // platelet degranulation // | 0005576 // extracellular region // traceable author statement /// 0005577 // fibrinogen complex // inferred from direct assay /// 0005615 // extracellular space // inferred from direct assay /// 0005737 // cytoplasm // inferred from electronic annotation /// 0005783 // endoplasmic reticulum // inferred from sequence or structural similarity /// 0009897 // external side of plasma membrane | 0001786 // phosphatidylserine binding // inferred from direct assay /// 0001948 // glycoprotein binding // non-traceable author statement /// 0001968 // fibronectin binding // inferred from direct assay /// 0005178 // integrin binding // inferred from mutant phenotype /// 0005509 // calcium ion binding // non-traceable author statement /// 0005515 // protein binding // inferred from physical interaction /// 0008201 // heparin binding // inferred from direct assay /// 0017134 // fibroblast growth factor binding // inferred from direct assay /// 0030169 // low-density lipoprotein particle binding // inferred from direct assay /// 0042802 // identical protein binding // non-traceable author |
| 216045_at | AB011137 | CCDC144A | Homo sapiens | 6-Oct-14 | Consensus sequence | GenBank | Consensus includes<br>gb:AB011137.2<br>/DEF=Homo sapiens mRNA for KIAA0565 protein, partial cds.<br>/FEA=mRNA<br>/GEN=KIAA0565<br>/PROD=KIAA0565 protein<br>/DB_XREF=gi:6683716<br>/UG=Hs.300938<br>KIAA0565 gene product | AB011137 | coiled-coil domain containing 144A | CCDC144A | 9720 | NM_014695 ///<br>XM_005256877<br>///<br>XM_006721607<br>///<br>XM_006721608 |                                                                                                                                                                                                                                                                                                                                                                                                                                                                                                                                                                                                                                                    |                                                                                                                                                                                                                                                                                                                                                                                                        |                                                                                                                                                                                                                                                                                                                                                                                                                                                                                                                                                                                                                                                                                                                          |

|             |          |      |              |          |                    |         |                                                                                                                                                                                                                                                                                                                   |          |               |      |       |                                                                                                                             |                                                                                                                                                                                                                                                                                                                                                                                                                                                                                                                                                                                                                                                                                              |                                                                                                                                                                                                                                                                                                                                               |                                                                                                                                                                                                                                                                                                                           |
|-------------|----------|------|--------------|----------|--------------------|---------|-------------------------------------------------------------------------------------------------------------------------------------------------------------------------------------------------------------------------------------------------------------------------------------------------------------------|----------|---------------|------|-------|-----------------------------------------------------------------------------------------------------------------------------|----------------------------------------------------------------------------------------------------------------------------------------------------------------------------------------------------------------------------------------------------------------------------------------------------------------------------------------------------------------------------------------------------------------------------------------------------------------------------------------------------------------------------------------------------------------------------------------------------------------------------------------------------------------------------------------------|-----------------------------------------------------------------------------------------------------------------------------------------------------------------------------------------------------------------------------------------------------------------------------------------------------------------------------------------------|---------------------------------------------------------------------------------------------------------------------------------------------------------------------------------------------------------------------------------------------------------------------------------------------------------------------------|
| 216379_x_at | AK000168 | CD24 | Homo sapiens | 6-Oct-14 | Consensus sequence | GenBank | Consensus includes gb:AK000168.1 /DEF=Homo sapiens cDNA FLJ20161 fis, clone COL09252, highly similar to L33930 Homo sapiens CD24 signal transducer mRNA. /FEA=mRNA /DB_XREF=gi:7020079 /UG=Hs.332045 Homo sapiens cDNA FLJ20161 fis, clone COL09252, highly similar to L33930 Homo sapiens CD24 signal transducer | AK000168 | CD24 molecule | CD24 | 1E+08 | NM_001291737 ///<br>NM_001291738 ///<br>NM_001291739 ///<br>NM_013230 ///<br>NR_117089 ///<br>NR_117090 ///<br>XM_005278329 | 0001666 // response to hypoxia // inferred from expression pattern ///<br>0001775 // cell activation // inferred from direct assay ///<br>0001959 // regulation of cytokine-mediated signaling pathway // inferred from sequence or structural similarity ///<br>0002237 // response to molecule of bacterial origin // inferred from sequence or structural similarity ///<br>0002768 // immune response-regulating cell surface receptor signaling pathway // inferred by curator ///<br>0007155 // cell adhesion // inferred from electronic annotation ///<br>0007204 // positive regulation of cytosolic calcium ion concentration // inferred from direct assay ///<br>0007411 // axon | 0005886 // plasma membrane // inferred from electronic annotation ///<br>0009986 // cell surface // inferred from direct assay ///<br>0016020 // membrane // inferred from direct assay ///<br>0031225 // anchored component of membrane // inferred from electronic annotation ///<br>0045121 // membrane raft // inferred from direct assay | 0004871 // signal transducer activity // non-traceable author statement ///<br>0005515 // protein binding // inferred from physical interaction ///<br>0019901 // protein kinase binding // inferred from physical interaction ///<br>0030296 // protein tyrosine kinase activator activity // inferred from direct assay |
|-------------|----------|------|--------------|----------|--------------------|---------|-------------------------------------------------------------------------------------------------------------------------------------------------------------------------------------------------------------------------------------------------------------------------------------------------------------------|----------|---------------|------|-------|-----------------------------------------------------------------------------------------------------------------------------|----------------------------------------------------------------------------------------------------------------------------------------------------------------------------------------------------------------------------------------------------------------------------------------------------------------------------------------------------------------------------------------------------------------------------------------------------------------------------------------------------------------------------------------------------------------------------------------------------------------------------------------------------------------------------------------------|-----------------------------------------------------------------------------------------------------------------------------------------------------------------------------------------------------------------------------------------------------------------------------------------------------------------------------------------------|---------------------------------------------------------------------------------------------------------------------------------------------------------------------------------------------------------------------------------------------------------------------------------------------------------------------------|

|             |          |          |              |          |                    |         |                                                                                                                                                                                                 |          |                                                 |           |      |                                                                                                                                                                                                                                            |                                                                                                                                                                                                                                                                                                                                                                                                                                                                                                                                                                                                                                                                    |                                                                                                              |                                                                                                                                                                                                                                                                                                                                    |
|-------------|----------|----------|--------------|----------|--------------------|---------|-------------------------------------------------------------------------------------------------------------------------------------------------------------------------------------------------|----------|-------------------------------------------------|-----------|------|--------------------------------------------------------------------------------------------------------------------------------------------------------------------------------------------------------------------------------------------|--------------------------------------------------------------------------------------------------------------------------------------------------------------------------------------------------------------------------------------------------------------------------------------------------------------------------------------------------------------------------------------------------------------------------------------------------------------------------------------------------------------------------------------------------------------------------------------------------------------------------------------------------------------------|--------------------------------------------------------------------------------------------------------------|------------------------------------------------------------------------------------------------------------------------------------------------------------------------------------------------------------------------------------------------------------------------------------------------------------------------------------|
| 216620_s_at | AF009205 | ARHGEF10 | Homo sapiens | 6-Oct-14 | Consensus sequence | GenBank | Consensus includes gb:AF009205.1 /DEF=Homo sapiens clone L5 unknown mRNA, partial cds. /FEA=mRNA /PROD=unknown /DB_XREF=gi:2454511 /UG=Hs.20695 Rho guanine nucleotide exchange factor (GEF) 10 | AF009205 | Rho guanine nucleotide exchange factor (GEF) 10 | ARHGEF 10 | 9639 | NM_014629 /// XM_005266039 /// XM_005266040 /// XM_005266041 /// XM_005266042 /// XM_006716238 /// XM_006716239 /// XM_006716240 /// XM_006716241 /// XM_006725104 /// XM_006725105 /// XM_006725106 /// XM_006725107 /// XM_006725108 /// | 0022011 // myelination in peripheral nervous system // inferred from mutant phenotype /// 0032319 // regulation of Rho GTPase activity // inferred from direct assay /// 0032319 // regulation of Rho GTPase activity // inferred from electronic annotation /// 0032321 // positive regulation of Rho GTPase activity // inferred from direct assay /// 0032321 // positive regulation of Rho GTPase activity // inferred from electronic annotation /// 0033126 // positive regulation of GTP catabolic process // inferred from direct assay /// 0035023 // regulation of Rho protein signal transduction // inferred from electronic annotation /// 0043547 // | 0005813 // centrosome // inferred from direct assay /// 0005829 // cytosol // non-traceable author statement | 0005085 // guanyl-nucleotide exchange factor activity // inferred from electronic annotation /// 0005089 // Rho guanyl-nucleotide exchange factor activity // inferred from direct assay /// 0005515 // protein binding // inferred from physical interaction /// 0019894 // kinesin binding // inferred from physical interaction |
|-------------|----------|----------|--------------|----------|--------------------|---------|-------------------------------------------------------------------------------------------------------------------------------------------------------------------------------------------------|----------|-------------------------------------------------|-----------|------|--------------------------------------------------------------------------------------------------------------------------------------------------------------------------------------------------------------------------------------------|--------------------------------------------------------------------------------------------------------------------------------------------------------------------------------------------------------------------------------------------------------------------------------------------------------------------------------------------------------------------------------------------------------------------------------------------------------------------------------------------------------------------------------------------------------------------------------------------------------------------------------------------------------------------|--------------------------------------------------------------------------------------------------------------|------------------------------------------------------------------------------------------------------------------------------------------------------------------------------------------------------------------------------------------------------------------------------------------------------------------------------------|



|           |          |                |                 |          |                       |         |                                                                                                                                                                                                                                                                               |          |                                                    |                |        |           |  |  |  |
|-----------|----------|----------------|-----------------|----------|-----------------------|---------|-------------------------------------------------------------------------------------------------------------------------------------------------------------------------------------------------------------------------------------------------------------------------------|----------|----------------------------------------------------|----------------|--------|-----------|--|--|--|
| 216686_at | AL137717 | ANKRD36<br>BP2 | Homo<br>sapiens | 6-Oct-14 | Consensus<br>sequence | GenBank | Consensus<br>includes<br>gb:AL137717.1<br>/DEF=Homo<br>sapiens mRNA;<br>cDNA<br>DKFZp434J1630<br>(from clone<br>DKFZp434J1630<br>). /FEA=mRNA<br>/DB_XREF=gi:6<br>808134<br>/UG=Hs.306469<br>Homo sapiens<br>mRNA; cDNA<br>DKFZp434J1630<br>(from clone<br>DKFZp434J1630<br>) | AL137717 | ankyrin<br>repeat<br>domain 36B<br>pseudogene<br>2 | ANKRD3<br>6BP2 | 645784 | NR_015424 |  |  |  |
|-----------|----------|----------------|-----------------|----------|-----------------------|---------|-------------------------------------------------------------------------------------------------------------------------------------------------------------------------------------------------------------------------------------------------------------------------------|----------|----------------------------------------------------|----------------|--------|-----------|--|--|--|

|             |        |         |              |          |                    |         |                                                                                                                                                                                                                         |        |                                                       |         |      |           |                                                                                                                                                                                                                                                                                            |                                                                                                                                                                                                                                                                                                                                           |                                                                                                                                                                                                                                                                                                                                                                                                                                          |
|-------------|--------|---------|--------------|----------|--------------------|---------|-------------------------------------------------------------------------------------------------------------------------------------------------------------------------------------------------------------------------|--------|-------------------------------------------------------|---------|------|-----------|--------------------------------------------------------------------------------------------------------------------------------------------------------------------------------------------------------------------------------------------------------------------------------------------|-------------------------------------------------------------------------------------------------------------------------------------------------------------------------------------------------------------------------------------------------------------------------------------------------------------------------------------------|------------------------------------------------------------------------------------------------------------------------------------------------------------------------------------------------------------------------------------------------------------------------------------------------------------------------------------------------------------------------------------------------------------------------------------------|
| 216687_x_at | U06641 | UGT2B15 | Homo sapiens | 6-Oct-14 | Consensus sequence | GenBank | Consensus includes gb:U06641.1 /DEF=Human UDP glucuronosyltransferase mRNA, partial cds. /FEA=mRNA /PROD=UDP glucuronosyltransferase /DB_XREF=gi:458398 /UG=Hs.150207 UDP glycosyltransferase 2 family, polypeptide B15 | U06641 | UDP glucuronosyltransferase 2 family, polypeptide B15 | UGT2B15 | 7366 | NM_001076 | 0006805 // xenobiotic metabolic process // traceable author statement /// 0008152 // metabolic process // inferred from electronic annotation /// 0008202 // steroid metabolic process // traceable author statement /// 0052695 // cellular glucuronidation // inferred from direct assay | 0005783 // endoplasmic reticulum // inferred from electronic annotation /// 0005789 // endoplasmic reticulum membrane // inferred from electronic annotation /// 0016020 // membrane // inferred from electronic annotation /// 0016021 // integral component of membrane // inferred from electronic annotation /// 0031090 // organelle | 0001972 // retinoic acid binding // inferred from direct assay /// 0015020 // glucuronosyltransferase activity // inferred from direct assay /// 0016740 // transferase activity // inferred from electronic annotation /// 0016757 // transferase activity, transferring glycosyl groups // inferred from electronic annotation /// 0016758 // transferase activity, transferring hexosyl groups // inferred from electronic annotation |
|-------------|--------|---------|--------------|----------|--------------------|---------|-------------------------------------------------------------------------------------------------------------------------------------------------------------------------------------------------------------------------|--------|-------------------------------------------------------|---------|------|-----------|--------------------------------------------------------------------------------------------------------------------------------------------------------------------------------------------------------------------------------------------------------------------------------------------|-------------------------------------------------------------------------------------------------------------------------------------------------------------------------------------------------------------------------------------------------------------------------------------------------------------------------------------------|------------------------------------------------------------------------------------------------------------------------------------------------------------------------------------------------------------------------------------------------------------------------------------------------------------------------------------------------------------------------------------------------------------------------------------------|

|           |        |      |              |          |                    |         |                                                                                                                                                                               |        |                                    |      |      |           |                                                                                                                                                                                                                                                                                                                                                                                                                                                                                                                                                                                                                  |                                                                                     |                                                                                                                      |
|-----------|--------|------|--------------|----------|--------------------|---------|-------------------------------------------------------------------------------------------------------------------------------------------------------------------------------|--------|------------------------------------|------|------|-----------|------------------------------------------------------------------------------------------------------------------------------------------------------------------------------------------------------------------------------------------------------------------------------------------------------------------------------------------------------------------------------------------------------------------------------------------------------------------------------------------------------------------------------------------------------------------------------------------------------------------|-------------------------------------------------------------------------------------|----------------------------------------------------------------------------------------------------------------------|
| 216834_at | S59049 | RGS1 | Homo sapiens | 6-Oct-14 | Consensus sequence | GenBank | Consensus includes gb:S59049.1 /DEF=BL34=B cell activation gene human, mRNA, 1398 nt. /FEA=mRNA /GEN=BL34 /DB_XREF=gi:299704 /UG=Hs.75256 regulator of G-protein signalling 1 | S59049 | regulator of G-protein signaling 1 | RGS1 | 5996 | NM_002922 | 0006955 // immune response // traceable author statement /// 0007165 // signal transduction // non-traceable author statement /// 0007193 // adenylate cyclase-inhibiting G-protein coupled receptor signaling pathway // traceable author statement /// 0009968 // negative regulation of signal transduction // inferred from electronic annotation /// 0038032 // termination of G-protein coupled receptor signaling pathway // inferred from electronic annotation /// 0043547 // positive regulation of GTPase activity // not recorded /// 0043547 // positive regulation of GTPase activity // traceable | 0005737 // cytoplasm // not recorded /// 0005886 // plasma membrane // not recorded | 0005096 // GTPase activator activity // not recorded /// 0005516 // calmodulin binding // traceable author statement |
|-----------|--------|------|--------------|----------|--------------------|---------|-------------------------------------------------------------------------------------------------------------------------------------------------------------------------------|--------|------------------------------------|------|------|-----------|------------------------------------------------------------------------------------------------------------------------------------------------------------------------------------------------------------------------------------------------------------------------------------------------------------------------------------------------------------------------------------------------------------------------------------------------------------------------------------------------------------------------------------------------------------------------------------------------------------------|-------------------------------------------------------------------------------------|----------------------------------------------------------------------------------------------------------------------|

|             |          |        |              |          |                    |         |                                                                                                                                                                                                                                    |          |                         |        |      |                            |                                                                                                                                                                                                                                                                                  |                                                                                                                                                                                                                                                                   |                                                                                                                                                                                                                                                                                                                                                                                  |
|-------------|----------|--------|--------------|----------|--------------------|---------|------------------------------------------------------------------------------------------------------------------------------------------------------------------------------------------------------------------------------------|----------|-------------------------|--------|------|----------------------------|----------------------------------------------------------------------------------------------------------------------------------------------------------------------------------------------------------------------------------------------------------------------------------|-------------------------------------------------------------------------------------------------------------------------------------------------------------------------------------------------------------------------------------------------------------------|----------------------------------------------------------------------------------------------------------------------------------------------------------------------------------------------------------------------------------------------------------------------------------------------------------------------------------------------------------------------------------|
| 216983_s_at | BC002889 | ZNF224 | Homo sapiens | 6-Oct-14 | Consensus sequence | GenBank | Consensus includes gb:BC002889.1 /DEF=Homo sapiens, clone IMAGE:3941350, mRNA, partial cds. /FEA=mRNA /PROD=Unknown (protein for IMAGE:3941350) /DB_XREF=gi:12804072 /UG=Hs.122605 Homo sapiens cDNA: FLJ22124 fis, clone HEP19352 | BC002889 | zinc finger protein 224 | ZNF224 | 7767 | NM_013398 /// XM_005259221 | 0006351 // transcription, DNA-templated // inferred from electronic annotation /// 0006355 // regulation of transcription, DNA-templated // inferred from electronic annotation /// 0045892 // negative regulation of transcription, DNA-templated // inferred from direct assay | 0005622 // intracellular // inferred from electronic annotation /// 0005634 // nucleus // inferred from direct assay /// 0017053 // transcriptional repressor complex // inferred from direct assay /// 0031965 // nuclear membrane // inferred from direct assay | 0003676 // nucleic acid binding // inferred from electronic annotation /// 0003677 // DNA binding // inferred from electronic annotation /// 0003700 // sequence-specific DNA binding transcription factor activity // not recorded /// 0005515 // protein binding // inferred from physical interaction /// 0046872 // metal ion binding // inferred from electronic annotation |
|-------------|----------|--------|--------------|----------|--------------------|---------|------------------------------------------------------------------------------------------------------------------------------------------------------------------------------------------------------------------------------------|----------|-------------------------|--------|------|----------------------------|----------------------------------------------------------------------------------------------------------------------------------------------------------------------------------------------------------------------------------------------------------------------------------|-------------------------------------------------------------------------------------------------------------------------------------------------------------------------------------------------------------------------------------------------------------------|----------------------------------------------------------------------------------------------------------------------------------------------------------------------------------------------------------------------------------------------------------------------------------------------------------------------------------------------------------------------------------|

|             |          |       |              |          |                    |         |                                                                                                                                                                            |          |                                             |       |       |                                                                                                                                                                         |                                                                                                                                                                                                                                                                                                                                                                                                                                                                                                                                                                                                                                                      |                                                                                                                                                                                                                                                                                                                                                                                               |                                                                                                                                                                                                                                                                                                                                                                                                                                                                                                                                                                                                                                                                                                                                             |
|-------------|----------|-------|--------------|----------|--------------------|---------|----------------------------------------------------------------------------------------------------------------------------------------------------------------------------|----------|---------------------------------------------|-------|-------|-------------------------------------------------------------------------------------------------------------------------------------------------------------------------|------------------------------------------------------------------------------------------------------------------------------------------------------------------------------------------------------------------------------------------------------------------------------------------------------------------------------------------------------------------------------------------------------------------------------------------------------------------------------------------------------------------------------------------------------------------------------------------------------------------------------------------------------|-----------------------------------------------------------------------------------------------------------------------------------------------------------------------------------------------------------------------------------------------------------------------------------------------------------------------------------------------------------------------------------------------|---------------------------------------------------------------------------------------------------------------------------------------------------------------------------------------------------------------------------------------------------------------------------------------------------------------------------------------------------------------------------------------------------------------------------------------------------------------------------------------------------------------------------------------------------------------------------------------------------------------------------------------------------------------------------------------------------------------------------------------------|
| 217028_at   | AJ224869 | CXCR4 | Homo sapiens | 6-Oct-14 | Consensus sequence | GenBank | Consensus includes gb:AJ224869 /DEF=Homo sapiens CXCR4 gene encoding receptor CXCR4 /FEA=mRNA /DB_XREF=gi:3059119 /UG=Hs.89414 chemokine (C-X-C motif), receptor 4 (fusin) | AJ224869 | chemokine (C-X-C motif) receptor 4          | CXCR4 | 7852  | NM_001008540<br>/// NM_003467                                                                                                                                           | 0000187 // activation of MAPK activity // traceable author statement /// 0001569 // patterning of blood vessels // inferred from electronic annotation /// 0001666 // response to hypoxia // inferred from expression pattern /// 0001667 // ameoboidal cell migration // inferred from electronic annotation /// 0001764 // neuron migration // inferred from electronic annotation /// 0002407 // dendritic cell chemotaxis // traceable author statement /// 0006915 // apoptotic process // traceable author statement /// 0006935 // chemotaxis // inferred from electronic annotation /// 0006954 // inflammatory response // traceable author | 0005737 // cytoplasm // traceable author statement /// 0005764 // lysosome // inferred from direct assay /// 0005768 // endosome // inferred from electronic annotation /// 0005769 // early endosome // inferred from direct assay /// 0005770 // late endosome // inferred from direct assay /// 0005886 // plasma membrane // inferred from direct assay /// 0005886 // plasma membrane // | 0001618 // virus receptor activity // inferred from electronic annotation /// 0003779 // actin binding // inferred from direct assay /// 0004871 // signal transducer activity // inferred from electronic annotation /// 0004930 // G-protein coupled receptor activity // traceable author statement /// 0004950 // chemokine receptor activity // inferred from electronic annotation /// 0005515 // protein binding // inferred from physical interaction /// 0015026 // coreceptor activity // traceable author statement /// 0016494 // C-X-C chemokine receptor activity // non-traceable author statement /// 0019955 // cytokine binding // inferred from electronic annotation /// 0031625 // ubiquitin protein ligase binding // |
| 217097_s_at | AC004990 | PHTF2 | Homo sapiens | 6-Oct-14 | Consensus sequence | GenBank | Consensus includes gb:AC004990 /DEF=Homo sapiens PAC clone RP5-118517 from 7q11.23-q21 /FEA=CDS_1 /DB_XREF=gi:3924668 /UG=Hs.128653 hypothetical protein DKFZp564F013      | AC004990 | putative homeodomain transcription factor 2 | PHTF2 | 57157 | NM_001127357<br>///<br>NM_001127358<br>///<br>NM_001127359<br>///<br>NM_001127360<br>/// NM_020432<br>///<br>XM_005250508<br>///<br>XM_005250509<br>///<br>XM_006716063 | 0006351 // transcription, DNA-templated // inferred from electronic annotation /// 0006355 // regulation of transcription, DNA-templated // inferred from electronic annotation                                                                                                                                                                                                                                                                                                                                                                                                                                                                      | 0005634 // nucleus // inferred from electronic annotation /// 0005783 // endoplasmic reticulum // inferred from direct assay                                                                                                                                                                                                                                                                  | 0003677 // DNA binding // inferred from electronic annotation                                                                                                                                                                                                                                                                                                                                                                                                                                                                                                                                                                                                                                                                               |

|             |          |       |              |          |                    |         |                                                                                                                                                            |          |                                                 |                  |               |                                                                         |                                                                                                                                                                                                                                                                                                                                                                                                                                                                                                                                                                                                                                      |                                                                                                                                                                                                                                                                        |                                                                                                                                                                                                                                                                                                                                                                                                                                                                                                                                                                                                                               |
|-------------|----------|-------|--------------|----------|--------------------|---------|------------------------------------------------------------------------------------------------------------------------------------------------------------|----------|-------------------------------------------------|------------------|---------------|-------------------------------------------------------------------------|--------------------------------------------------------------------------------------------------------------------------------------------------------------------------------------------------------------------------------------------------------------------------------------------------------------------------------------------------------------------------------------------------------------------------------------------------------------------------------------------------------------------------------------------------------------------------------------------------------------------------------------|------------------------------------------------------------------------------------------------------------------------------------------------------------------------------------------------------------------------------------------------------------------------|-------------------------------------------------------------------------------------------------------------------------------------------------------------------------------------------------------------------------------------------------------------------------------------------------------------------------------------------------------------------------------------------------------------------------------------------------------------------------------------------------------------------------------------------------------------------------------------------------------------------------------|
| 217165_x_at | M10943   | MT1F  | Homo sapiens | 6-Oct-14 | Consensus sequence | GenBank | Consensus includes gb:M10943 /DEF=Human metallothionein-1f gene (hMT-1f) /FEA=CDS /DB_XREF=gi:187540 /UG=Hs.203936 metallothionein 1F (functional)         | M10943   | metallothionein 1F                              | MT1F             | 4494          | NM_005949                                                               | 0045926 // negative regulation of growth // inferred from sequence or structural similarity /// 0071276 // cellular response to cadmium ion // inferred from expression pattern /// 0071294 // cellular response to zinc ion // inferred from sequence or structural similarity                                                                                                                                                                                                                                                                                                                                                      | 0005634 // nucleus // inferred from direct assay /// 0005737 // cytoplasm // inferred from direct assay /// 0048471 // perinuclear region of cytoplasm // inferred from sequence or structural similarity                                                              | 0005507 // copper ion binding // non-traceable author statement /// 0008270 // zinc ion binding // inferred from sequence or structural similarity /// 0046870 // cadmium ion binding // non-traceable author statement /// 0046872 // metal ion binding // inferred from electronic annotation                                                                                                                                                                                                                                                                                                                               |
| 217399_s_at | AF032887 | FOXO3 | Homo sapiens | 6-Oct-14 | Consensus sequence | GenBank | Consensus includes gb:AF032887 /DEF=Homo sapiens forkhead (FKHRL1P1) pseudogene, chromosome 17 /FEA=CDS /DB_XREF=gi:2895505 /UG=Hs.274468 forkhead box O3B | AF032887 | forkhead box O3 /// forkhead box O3B pseudogene | FOXO3 /// FOXO3B | 2309 /// 2310 | NM_001455 /// NM_201559 /// NR_026718 /// XM_005266867 /// XM_005266868 | 0000122 // negative regulation of transcription from RNA polymerase II promoter // inferred from mutant phenotype /// 0001542 // ovulation from ovarian follicle // inferred from electronic annotation /// 0001544 // initiation of primordial ovarian follicle growth // inferred from electronic annotation /// 0001547 // antral ovarian follicle growth // inferred from electronic annotation /// 0001556 // oocyte maturation // inferred from electronic annotation /// 0006351 // transcription, DNA-templated // inferred from electronic annotation /// 0006355 // regulation of transcription, DNA-templated // inferred | 0005634 // nucleus // inferred from direct assay /// 0005654 // nucleoplasm // traceable author statement /// 0005737 // cytoplasm // inferred from direct assay /// 0005829 // cytosol // not recorded /// 0016020 // membrane // inferred from electronic annotation | 0001047 // core promoter binding // inferred from sequence or structural similarity /// 0003677 // DNA binding // inferred from direct assay /// 0003700 // sequence-specific DNA binding transcription factor activity // inferred from direct assay /// 0005515 // protein binding // inferred from physical interaction /// 0008301 // DNA binding, bending // not recorded /// 0019901 // protein kinase binding // inferred from physical interaction /// 0031490 // chromatin DNA binding // inferred from sequence or structural similarity /// 0043565 // sequence-specific DNA binding // inferred from direct assay |

|           |          |        |              |          |                    |         |                                                                                                                            |          |                             |        |      |           |                                                                                                                                                                                                                                                                                                                                                                                                                                                                                                                                                                              |                                                                                                                                                                                                                                                                                                                                                                           |                                                                                                                                                                                                                                                                                                                                                                                                                                                                                                                                                                                                                                                                                                                             |
|-----------|----------|--------|--------------|----------|--------------------|---------|----------------------------------------------------------------------------------------------------------------------------|----------|-----------------------------|--------|------|-----------|------------------------------------------------------------------------------------------------------------------------------------------------------------------------------------------------------------------------------------------------------------------------------------------------------------------------------------------------------------------------------------------------------------------------------------------------------------------------------------------------------------------------------------------------------------------------------|---------------------------------------------------------------------------------------------------------------------------------------------------------------------------------------------------------------------------------------------------------------------------------------------------------------------------------------------------------------------------|-----------------------------------------------------------------------------------------------------------------------------------------------------------------------------------------------------------------------------------------------------------------------------------------------------------------------------------------------------------------------------------------------------------------------------------------------------------------------------------------------------------------------------------------------------------------------------------------------------------------------------------------------------------------------------------------------------------------------------|
| 217503_at | AA203487 | STK17B | Homo sapiens | 6-Oct-14 | Consensus sequence | GenBank | Consensus includes gb:AA203487 /FEA=EST /DB_XREF=gi:1799460 /DB_XREF=est:zx53d03.r1 /CLONE=IMAGE:446213 /UG=Hs.314363 ESTs | AA203487 | serine/threonine kinase 17b | STK17B | 9262 | NM_004226 | 0006468 // protein phosphorylation // inferred from direct assay /// 0006915 // apoptotic process // inferred from electronic annotation /// 0012501 // programmed cell death // inferred from electronic annotation /// 0016310 // phosphorylation // inferred from electronic annotation /// 0035556 // intracellular signal transduction // inferred from direct assay /// 0046777 // protein autophosphorylation // inferred from sequence or structural similarity /// 2000271 // positive regulation of fibroblast apoptotic process // inferred from mutant phenotype | 0005634 // nucleus // inferred from direct assay /// 0005793 // endoplasmic reticulum-Golgi intermediate compartment // inferred from electronic annotation /// 0005886 // plasma membrane // inferred from electronic annotation /// 0015629 // actin cytoskeleton // inferred from electronic annotation /// 0016020 // membrane // inferred from electronic annotation | 0000166 // nucleotide binding // inferred from electronic annotation /// 0004672 // protein kinase activity // inferred from sequence or structural similarity /// 0004674 // protein serine/threonine kinase activity // inferred from direct assay /// 0004713 // protein tyrosine kinase activity // inferred from electronic annotation /// 0005515 // protein binding // inferred from electronic annotation /// 0005524 // ATP binding // inferred from direct assay /// 0016301 // kinase activity // inferred from electronic annotation /// 0016740 // transferase activity // inferred from electronic annotation /// 0016772 // transferase activity, transferring phosphorus-containing groups // inferred from |
|-----------|----------|--------|--------------|----------|--------------------|---------|----------------------------------------------------------------------------------------------------------------------------|----------|-----------------------------|--------|------|-----------|------------------------------------------------------------------------------------------------------------------------------------------------------------------------------------------------------------------------------------------------------------------------------------------------------------------------------------------------------------------------------------------------------------------------------------------------------------------------------------------------------------------------------------------------------------------------------|---------------------------------------------------------------------------------------------------------------------------------------------------------------------------------------------------------------------------------------------------------------------------------------------------------------------------------------------------------------------------|-----------------------------------------------------------------------------------------------------------------------------------------------------------------------------------------------------------------------------------------------------------------------------------------------------------------------------------------------------------------------------------------------------------------------------------------------------------------------------------------------------------------------------------------------------------------------------------------------------------------------------------------------------------------------------------------------------------------------------|

|           |          |        |              |          |                    |         |                                                                                                                                               |          |                            |        |       |                                                                                                    |                                                                                                                                                                                                                                                                                                                                                                                                                                                                                                                                                              |                                                                                                                      |                                                                                                                                                                                                                                                                                                                                                                                                                                |
|-----------|----------|--------|--------------|----------|--------------------|---------|-----------------------------------------------------------------------------------------------------------------------------------------------|----------|----------------------------|--------|-------|----------------------------------------------------------------------------------------------------|--------------------------------------------------------------------------------------------------------------------------------------------------------------------------------------------------------------------------------------------------------------------------------------------------------------------------------------------------------------------------------------------------------------------------------------------------------------------------------------------------------------------------------------------------------------|----------------------------------------------------------------------------------------------------------------------|--------------------------------------------------------------------------------------------------------------------------------------------------------------------------------------------------------------------------------------------------------------------------------------------------------------------------------------------------------------------------------------------------------------------------------|
| 217595_at | AV701723 | GSPT1  | Homo sapiens | 6-Oct-14 | Consensus sequence | GenBank | Consensus includes<br>gb:AV701723<br>/FEA=EST<br>/DB_XREF=gi:10718053<br>/DB_XREF=est:AV701723<br>/CLONE=ADBCTC02<br>/UG=Hs.237849 ESTs       | AV701723 | G1 to S phase transition 1 | GSPT1  | 2935  | NM_001130006<br>///<br>NM_001130007<br>/// NM_002094<br>///<br>XM_005255274<br>///<br>XM_005255275 | 0000082 // G1/S transition of mitotic cell cycle // traceable author statement /// 0000184 // nuclear-transcribed mRNA catabolic process, nonsense-mediated decay // traceable author statement /// 0006184 // GTP catabolic process // inferred from electronic annotation /// 0006184 // GTP catabolic process // traceable author statement /// 0006412 // translation // inferred from electronic annotation /// 0006415 // translational termination // inferred from mutant phenotype /// 0006479 // protein methylation // inferred from direct assay | 0005622 // intracellular // non-traceable author statement                                                           | 0000166 // nucleotide binding // inferred from electronic annotation /// 0003747 // translation release factor activity // inferred from mutant phenotype /// 0003924 // GTPase activity // traceable author statement /// 0005515 // protein binding // inferred from physical interaction /// 0005525 // GTP binding // inferred from electronic annotation /// 0044822 // poly(A) RNA binding // inferred from direct assay |
| 217663_at | AW264320 | ZNF234 | Homo sapiens | 6-Oct-14 | Consensus sequence | GenBank | Consensus includes<br>gb:AW264320<br>/FEA=EST<br>/DB_XREF=gi:6641062<br>/DB_XREF=est:xq98c06.x1<br>/CLONE=IMAGE:2758666<br>/UG=Hs.235992 ESTs | AW264320 | zinc finger protein 234    | ZNF234 | 10780 | NM_001144824<br>/// NM_006630<br>///<br>XM_006722973<br>///<br>XM_006722974<br>///<br>XM_006722975 | 0006351 // transcription, DNA-templated // inferred from electronic annotation /// 0006355 // regulation of transcription, DNA-templated // not recorded                                                                                                                                                                                                                                                                                                                                                                                                     | 0005622 // intracellular // inferred from electronic annotation /// 0005634 // nucleus // inferred from direct assay | 0003676 // nucleic acid binding // inferred from electronic annotation /// 0003677 // DNA binding // inferred from electronic annotation /// 0003700 // sequence-specific DNA binding transcription factor activity // not recorded /// 0046872 // metal ion binding // inferred from electronic annotation                                                                                                                    |



|           |          |       |              |          |                    |         |                                                                                                                                                                                                                      |          |                                        |       |       |                                                |                                                                                                                                                                                                                                                                                                                                                                                                                                                                                                                                                                                                       |                                                                                                                                                                                                                                                                                                                                                                                                                  |                                                                                                                                                                                                                                                                                                                                                                                                                                                                                                                                                                                                                                                             |
|-----------|----------|-------|--------------|----------|--------------------|---------|----------------------------------------------------------------------------------------------------------------------------------------------------------------------------------------------------------------------|----------|----------------------------------------|-------|-------|------------------------------------------------|-------------------------------------------------------------------------------------------------------------------------------------------------------------------------------------------------------------------------------------------------------------------------------------------------------------------------------------------------------------------------------------------------------------------------------------------------------------------------------------------------------------------------------------------------------------------------------------------------------|------------------------------------------------------------------------------------------------------------------------------------------------------------------------------------------------------------------------------------------------------------------------------------------------------------------------------------------------------------------------------------------------------------------|-------------------------------------------------------------------------------------------------------------------------------------------------------------------------------------------------------------------------------------------------------------------------------------------------------------------------------------------------------------------------------------------------------------------------------------------------------------------------------------------------------------------------------------------------------------------------------------------------------------------------------------------------------------|
| 217738_at | BF575514 | NAMPT | Homo sapiens | 6-Oct-14 | Consensus sequence | GenBank | Consensus includes<br>gb:BF575514<br>/FEA=EST<br>/DB_XREF=gi:1649318<br>/DB_XREF=est:602133090F1<br>/CLONE=IMAGE:4288079<br>/UG=Hs.239138<br>pre-B-cell colony-enhancing factor<br>/FL=gb:U02020.1<br>gb:NM_005746.1 | BF575514 | nicotinamide phosphoribosyltransferase | NAMPT | 10135 | NM_005746 ///<br>NM_182790 ///<br>XM_005250100 | 0006766 // vitamin metabolic process // traceable author statement /// 0006767 // water-soluble vitamin metabolic process // traceable author statement /// 0006769 // nicotinamide metabolic process // traceable author statement /// 0007165 // signal transduction // traceable author statement /// 0007267 // cell-cell signaling // traceable author statement /// 0008284 // positive regulation of cell proliferation // traceable author statement /// 0008286 // insulin receptor signaling pathway // inferred from direct assay /// 0009435 // NAD biosynthetic process // inferred from | 0005576 // extracellular region // inferred from electronic annotation /// 0005615 // extracellular space // inferred from electronic annotation /// 0005634 // nucleus // inferred from electronic annotation /// 0005737 // cytoplasm // inferred from electronic annotation /// 0005829 // cytosol // traceable author statement /// 0070062 // extracellular vesicular exosome // inferred from direct assay | 0004514 // nicotinate-nucleotide diphosphorylase (carboxylating) activity // inferred from electronic annotation /// 0004516 // nicotinate phosphoribosyltransferase activity // inferred from electronic annotation /// 0005125 // cytokine activity // inferred from electronic annotation /// 0005515 // protein binding // inferred from physical interaction /// 0016740 // transferase activity // inferred from electronic annotation /// 0016757 // transferase activity, transferring glycosyl groups // inferred from electronic annotation /// 0047280 // nicotinamide phosphoribosyltransferase activity // inferred from electronic annotation |
|-----------|----------|-------|--------------|----------|--------------------|---------|----------------------------------------------------------------------------------------------------------------------------------------------------------------------------------------------------------------------|----------|----------------------------------------|-------|-------|------------------------------------------------|-------------------------------------------------------------------------------------------------------------------------------------------------------------------------------------------------------------------------------------------------------------------------------------------------------------------------------------------------------------------------------------------------------------------------------------------------------------------------------------------------------------------------------------------------------------------------------------------------------|------------------------------------------------------------------------------------------------------------------------------------------------------------------------------------------------------------------------------------------------------------------------------------------------------------------------------------------------------------------------------------------------------------------|-------------------------------------------------------------------------------------------------------------------------------------------------------------------------------------------------------------------------------------------------------------------------------------------------------------------------------------------------------------------------------------------------------------------------------------------------------------------------------------------------------------------------------------------------------------------------------------------------------------------------------------------------------------|

|             |           |       |              |          |                   |         |                                                                                                                                                                                                                                                    |           |                                        |       |       |                                          |                                                                                                                                                                                                                                                                                                                                                                                                                                                                                                                                                                                                       |                                                                                                                                                                                                                                                                                                                                                                                                                  |                                                                                                                                                                                                                                                                                                                                                                                                                                                                                                                                                                                                                                                             |
|-------------|-----------|-------|--------------|----------|-------------------|---------|----------------------------------------------------------------------------------------------------------------------------------------------------------------------------------------------------------------------------------------------------|-----------|----------------------------------------|-------|-------|------------------------------------------|-------------------------------------------------------------------------------------------------------------------------------------------------------------------------------------------------------------------------------------------------------------------------------------------------------------------------------------------------------------------------------------------------------------------------------------------------------------------------------------------------------------------------------------------------------------------------------------------------------|------------------------------------------------------------------------------------------------------------------------------------------------------------------------------------------------------------------------------------------------------------------------------------------------------------------------------------------------------------------------------------------------------------------|-------------------------------------------------------------------------------------------------------------------------------------------------------------------------------------------------------------------------------------------------------------------------------------------------------------------------------------------------------------------------------------------------------------------------------------------------------------------------------------------------------------------------------------------------------------------------------------------------------------------------------------------------------------|
| 217739_s_at | NM_005746 | NAMPT | Homo sapiens | 6-Oct-14 | Exemplar sequence | GenBank | gb:NM_005746.1 /DEF=Homo sapiens pre-B-cell colony-enhancing factor (PBEF), mRNA. /FEA=mRNA /GEN=PBEF /PROD=pre-B-cell colony-enhancing factor /DB_XREF=gi:5031976 /UG=Hs.239138 pre-B-cell colony-enhancing factor /FL=gb:U02020.1 gb:NM_005746.1 | NM_005746 | nicotinamide phosphoribosyltransferase | NAMPT | 10135 | NM_005746 /// NM_182790 /// XM_005250100 | 0006766 // vitamin metabolic process // traceable author statement /// 0006767 // water-soluble vitamin metabolic process // traceable author statement /// 0006769 // nicotinamide metabolic process // traceable author statement /// 0007165 // signal transduction // traceable author statement /// 0007267 // cell-cell signaling // traceable author statement /// 0008284 // positive regulation of cell proliferation // traceable author statement /// 0008286 // insulin receptor signaling pathway // inferred from direct assay /// 0009435 // NAD biosynthetic process // inferred from | 0005576 // extracellular region // inferred from electronic annotation /// 0005615 // extracellular space // inferred from electronic annotation /// 0005634 // nucleus // inferred from electronic annotation /// 0005737 // cytoplasm // inferred from electronic annotation /// 0005829 // cytosol // traceable author statement /// 0070062 // extracellular vesicular exosome // inferred from direct assay | 0004514 // nicotinate-nucleotide diphosphorylase (carboxylating) activity // inferred from electronic annotation /// 0004516 // nicotinate phosphoribosyltransferase activity // inferred from electronic annotation /// 0005125 // cytokine activity // inferred from electronic annotation /// 0005515 // protein binding // inferred from physical interaction /// 0016740 // transferase activity // inferred from electronic annotation /// 0016757 // transferase activity, transferring glycosyl groups // inferred from electronic annotation /// 0047280 // nicotinamide phosphoribosyltransferase activity // inferred from electronic annotation |
|-------------|-----------|-------|--------------|----------|-------------------|---------|----------------------------------------------------------------------------------------------------------------------------------------------------------------------------------------------------------------------------------------------------|-----------|----------------------------------------|-------|-------|------------------------------------------|-------------------------------------------------------------------------------------------------------------------------------------------------------------------------------------------------------------------------------------------------------------------------------------------------------------------------------------------------------------------------------------------------------------------------------------------------------------------------------------------------------------------------------------------------------------------------------------------------------|------------------------------------------------------------------------------------------------------------------------------------------------------------------------------------------------------------------------------------------------------------------------------------------------------------------------------------------------------------------------------------------------------------------|-------------------------------------------------------------------------------------------------------------------------------------------------------------------------------------------------------------------------------------------------------------------------------------------------------------------------------------------------------------------------------------------------------------------------------------------------------------------------------------------------------------------------------------------------------------------------------------------------------------------------------------------------------------|

|             |           |       |              |          |                   |         |                                                                                                                                                                                                                                 |           |                                                                    |                        |                    |                                                                            |                                                                                                                                                                                                                                                                                                                                                                                                                                                                                                                                                                                                                                                                           |                                                                                                                                                                                                                                                                                                                                                                            |                                                                  |
|-------------|-----------|-------|--------------|----------|-------------------|---------|---------------------------------------------------------------------------------------------------------------------------------------------------------------------------------------------------------------------------------|-----------|--------------------------------------------------------------------|------------------------|--------------------|----------------------------------------------------------------------------|---------------------------------------------------------------------------------------------------------------------------------------------------------------------------------------------------------------------------------------------------------------------------------------------------------------------------------------------------------------------------------------------------------------------------------------------------------------------------------------------------------------------------------------------------------------------------------------------------------------------------------------------------------------------------|----------------------------------------------------------------------------------------------------------------------------------------------------------------------------------------------------------------------------------------------------------------------------------------------------------------------------------------------------------------------------|------------------------------------------------------------------|
| 217837_s_at | NM_016079 | CHMP3 | Homo sapiens | 6-Oct-14 | Exemplar sequence | GenBank | gb:NM_016079.1 /DEF=Homo sapiens CGI-149 protein (LOC51652), mRNA. /FEA=mRNA /GEN=LOC51652 /PROD=CGI-149 protein /DB_XREF=gi:7706352 /UG=Hs.189658 CGI-149 protein /FL=gb:BC004419.1 gb:AF151907.1 gb:AF219226.1 gb:NM_016079.1 | NM_016079 | charged multivesicular body protein 3 /// RNF103-CHMP3 readthrough | CHMP3 /// RNF103-CHMP3 | 51652 /// 10052676 | NM_001005753 /// NM_001193517 /// NM_001198954 /// NM_016079 /// NR_036454 | 0006810 // transport // inferred from electronic annotation /// 0006915 // apoptotic process // inferred from electronic annotation /// 0007049 // cell cycle // inferred from electronic annotation /// 0015031 // protein transport // inferred from electronic annotation /// 0016032 // viral process // traceable author statement /// 0016197 // endosomal transport // traceable author statement /// 0019058 // viral life cycle // traceable author statement /// 0050792 // regulation of viral process // inferred from mutant phenotype /// 0051301 // cell division // inferred from electronic annotation /// 0061024 // membrane organization // traceable | 0005737 // cytoplasm // inferred from electronic annotation /// 0005768 // endosome // inferred from electronic annotation /// 0005829 // cytosol // traceable author statement /// 0016020 // membrane // inferred from electronic annotation /// 0031902 // late endosome membrane // inferred from electronic annotation /// 0070062 // extracellular vesicular exosome | 0005515 // protein binding // inferred from physical interaction |
|-------------|-----------|-------|--------------|----------|-------------------|---------|---------------------------------------------------------------------------------------------------------------------------------------------------------------------------------------------------------------------------------|-----------|--------------------------------------------------------------------|------------------------|--------------------|----------------------------------------------------------------------------|---------------------------------------------------------------------------------------------------------------------------------------------------------------------------------------------------------------------------------------------------------------------------------------------------------------------------------------------------------------------------------------------------------------------------------------------------------------------------------------------------------------------------------------------------------------------------------------------------------------------------------------------------------------------------|----------------------------------------------------------------------------------------------------------------------------------------------------------------------------------------------------------------------------------------------------------------------------------------------------------------------------------------------------------------------------|------------------------------------------------------------------|

|             |           |       |              |          |                   |         |                                                                                                                                                                                                                                                                                                      |           |                                 |       |       |                                       |                                                                                                                                                                                                                                                                                                                                                  |                                                                                                                                                                                                                                                                                                                                                                            |                                                                                                                                                                                                                                 |
|-------------|-----------|-------|--------------|----------|-------------------|---------|------------------------------------------------------------------------------------------------------------------------------------------------------------------------------------------------------------------------------------------------------------------------------------------------------|-----------|---------------------------------|-------|-------|---------------------------------------|--------------------------------------------------------------------------------------------------------------------------------------------------------------------------------------------------------------------------------------------------------------------------------------------------------------------------------------------------|----------------------------------------------------------------------------------------------------------------------------------------------------------------------------------------------------------------------------------------------------------------------------------------------------------------------------------------------------------------------------|---------------------------------------------------------------------------------------------------------------------------------------------------------------------------------------------------------------------------------|
| 217867_x_at | NM_012105 | BACE2 | Homo sapiens | 6-Oct-14 | Exemplar sequence | GenBank | gb:NM_012105.1 /DEF=Homo sapiens beta-site APP-cleaving enzyme 2 (BACE2), mRNA. /FEA=mRNA /GEN=BACE2 /PROD=beta-site APP-cleaving enzyme 2 /DB_XREF=gi:6912263 /UG=Hs.271411 beta-site APP-cleaving enzyme 2 /FL=gb:AF117892.1 gb:AF050171.1 gb:AF200192.1 gb:AF200342.1 gb:AF204944.1 gb:AF178532.1 | NM_012105 | beta-site APP-cleaving enzyme 2 | BACE2 | 25825 | NM_012105 /// NM_138991 /// NM_138992 | 0006508 // proteolysis // non-traceable author statement /// 0006509 // membrane protein ectodomain proteolysis // inferred from direct assay /// 0016486 // peptide hormone processing // non-traceable author statement /// 0042985 // negative regulation of amyloid precursor protein biosynthetic process // inferred from mutant phenotype | 0005768 // endosome // inferred from electronic annotation /// 0005783 // endoplasmic reticulum // inferred from electronic annotation /// 0005794 // Golgi apparatus // inferred from direct assay /// 0009986 // cell surface // inferred from electronic annotation /// 0016020 // membrane // inferred from electronic annotation /// 0016021 // integral component of | 0004190 // aspartic-type endopeptidase activity // inferred from direct assay /// 0008233 // peptidase activity // inferred from electronic annotation /// 0016787 // hydrolase activity // inferred from electronic annotation |
|-------------|-----------|-------|--------------|----------|-------------------|---------|------------------------------------------------------------------------------------------------------------------------------------------------------------------------------------------------------------------------------------------------------------------------------------------------------|-----------|---------------------------------|-------|-------|---------------------------------------|--------------------------------------------------------------------------------------------------------------------------------------------------------------------------------------------------------------------------------------------------------------------------------------------------------------------------------------------------|----------------------------------------------------------------------------------------------------------------------------------------------------------------------------------------------------------------------------------------------------------------------------------------------------------------------------------------------------------------------------|---------------------------------------------------------------------------------------------------------------------------------------------------------------------------------------------------------------------------------|

|           |           |        |              |          |                   |         |                                                                                                                                                                                                                                                 |           |                           |        |       |                            |  |                                                           |                                                                   |
|-----------|-----------|--------|--------------|----------|-------------------|---------|-------------------------------------------------------------------------------------------------------------------------------------------------------------------------------------------------------------------------------------------------|-----------|---------------------------|--------|-------|----------------------------|--|-----------------------------------------------------------|-------------------------------------------------------------------|
| 217906_at | NM_014315 | KLHDC2 | Homo sapiens | 6-Oct-14 | Exemplar sequence | GenBank | gb:NM_014315.1 /DEF=Homo sapiens host cell factor homolog (LCP), mRNA. /FEA=mRNA /GEN=LCP /PROD=host cell factor homolog /DB_XREF=gi:7657300 /UG=Hs.20597 host cell factor homolog /FL=gb:BC002335.1 gb:AF113131.1 gb:NM_014315.1 gb:AF244137.1 | NM_014315 | kelch domain containing 2 | KLHDC2 | 23588 | NM_014315 /// XM_006720094 |  | 0005634 // nucleus // inferred from electronic annotation | 0005515 // protein binding // inferred from electronic annotation |
|-----------|-----------|--------|--------------|----------|-------------------|---------|-------------------------------------------------------------------------------------------------------------------------------------------------------------------------------------------------------------------------------------------------|-----------|---------------------------|--------|-------|----------------------------|--|-----------------------------------------------------------|-------------------------------------------------------------------|

|           |           |         |              |          |                   |         |                                                                                                                                                                                                                                                             |           |                                       |         |       |                                                                                                                           |                                                                                                                                                                                                                                                                                                                                                                                                                            |                                                                                                                                                                                                      |                                                                                                                                                                                                               |
|-----------|-----------|---------|--------------|----------|-------------------|---------|-------------------------------------------------------------------------------------------------------------------------------------------------------------------------------------------------------------------------------------------------------------|-----------|---------------------------------------|---------|-------|---------------------------------------------------------------------------------------------------------------------------|----------------------------------------------------------------------------------------------------------------------------------------------------------------------------------------------------------------------------------------------------------------------------------------------------------------------------------------------------------------------------------------------------------------------------|------------------------------------------------------------------------------------------------------------------------------------------------------------------------------------------------------|---------------------------------------------------------------------------------------------------------------------------------------------------------------------------------------------------------------|
| 218240_at | NM_017595 | NKIRAS2 | Homo sapiens | 6-Oct-14 | Exemplar sequence | GenBank | gb:NM_017595.1 /DEF=Homo sapiens I-kappa-B-interacting Ras-like protein 2 (KBRAS2), mRNA. /FEA=mRNA /GEN=KBRAS2 /PROD=I-kappa-B-interacting Ras-like protein 2 /DB_XREF=gi:8922150 /UG=Hs.22937 I-kappa-B-interacting Ras-like protein 2 /FL=gb:NM_017595.1 | NM_017595 | NFKB inhibitor interacting Ras-like 2 | NKIRAS2 | 28511 | NM_001001349<br>///<br>NM_001144927<br>///<br>NM_001144928<br>///<br>NM_001144929<br>/// NM_017595<br>///<br>XM_005257251 | 0006184 // GTP catabolic process // inferred from electronic annotation ///<br>0007165 // signal transduction // inferred from electronic annotation ///<br>0007249 // I-kappaB kinase/NF-kappaB signaling // non-traceable author statement ///<br>0007264 // small GTPase mediated signal transduction // inferred from electronic annotation ///<br>0015031 // protein transport // inferred from electronic annotation | 0005622 // intracellular // inferred from electronic annotation ///<br>0005737 // cytoplasm // inferred from electronic annotation ///<br>0016020 // membrane // inferred from electronic annotation | 0000166 // nucleotide binding // inferred from electronic annotation ///<br>0003924 // GTPase activity // non-traceable author statement ///<br>0005525 // GTP binding // inferred from electronic annotation |
|-----------|-----------|---------|--------------|----------|-------------------|---------|-------------------------------------------------------------------------------------------------------------------------------------------------------------------------------------------------------------------------------------------------------------|-----------|---------------------------------------|---------|-------|---------------------------------------------------------------------------------------------------------------------------|----------------------------------------------------------------------------------------------------------------------------------------------------------------------------------------------------------------------------------------------------------------------------------------------------------------------------------------------------------------------------------------------------------------------------|------------------------------------------------------------------------------------------------------------------------------------------------------------------------------------------------------|---------------------------------------------------------------------------------------------------------------------------------------------------------------------------------------------------------------|

|             |           |           |              |          |                   |         |                                                                                                                                                                                                                                                                              |           |                                                        |           |       |           |                                                                                                                                                                                                                                                                                                                                                                                                                                                                                                                                                                                                                                                                         |                                                                                                                                                                                                                                                                                                                                                       |                                                                  |
|-------------|-----------|-----------|--------------|----------|-------------------|---------|------------------------------------------------------------------------------------------------------------------------------------------------------------------------------------------------------------------------------------------------------------------------------|-----------|--------------------------------------------------------|-----------|-------|-----------|-------------------------------------------------------------------------------------------------------------------------------------------------------------------------------------------------------------------------------------------------------------------------------------------------------------------------------------------------------------------------------------------------------------------------------------------------------------------------------------------------------------------------------------------------------------------------------------------------------------------------------------------------------------------------|-------------------------------------------------------------------------------------------------------------------------------------------------------------------------------------------------------------------------------------------------------------------------------------------------------------------------------------------------------|------------------------------------------------------------------|
| 218368_s_at | NM_016639 | TNFRSF12A | Homo sapiens | 6-Oct-14 | Exemplar sequence | GenBank | gb:NM_016639.1 /DEF=Homo sapiens type I transmembrane protein Fn14 (FN14), mRNA. /FEA=mRNA /GEN=FN14 /PROD=type I transmembrane protein Fn14 /DB_XREF=gi:7706185 /UG=Hs.10086 type I transmembrane protein Fn14 /FL=gb:BC002718.1 gb:AB035480.1 gb:NM_016639.1 gb:AF191148.1 | NM_016639 | tumor necrosis factor receptor superfamily, member 12A | TNFRSF12A | 51330 | NM_016639 | 0001525 // angiogenesis // inferred from electronic annotation /// 0006915 // apoptotic process // inferred from electronic annotation /// 0006928 // cellular component movement // traceable author statement /// 0006931 // substrate-dependent cell migration, cell attachment to substrate // inferred from electronic annotation /// 0007155 // cell adhesion // inferred from electronic annotation /// 0007275 // multicellular organismal development // inferred from electronic annotation /// 0007275 // multicellular organismal development // traceable author statement /// 0008219 // cell death // inferred from electronic annotation /// 0030154 // | 0001726 // ruffle // inferred from electronic annotation /// 0005886 // plasma membrane // inferred from electronic annotation /// 0009986 // cell surface // inferred from electronic annotation /// 0016020 // membrane // inferred from electronic annotation /// 0016021 // integral component of membrane // inferred from electronic annotation | 0005515 // protein binding // inferred from physical interaction |
|-------------|-----------|-----------|--------------|----------|-------------------|---------|------------------------------------------------------------------------------------------------------------------------------------------------------------------------------------------------------------------------------------------------------------------------------|-----------|--------------------------------------------------------|-----------|-------|-----------|-------------------------------------------------------------------------------------------------------------------------------------------------------------------------------------------------------------------------------------------------------------------------------------------------------------------------------------------------------------------------------------------------------------------------------------------------------------------------------------------------------------------------------------------------------------------------------------------------------------------------------------------------------------------------|-------------------------------------------------------------------------------------------------------------------------------------------------------------------------------------------------------------------------------------------------------------------------------------------------------------------------------------------------------|------------------------------------------------------------------|

|           |           |       |              |          |                   |         |                                                                                                                                                                                                                                                                                                  |           |                         |       |       |                                                                                                                                                  |                                                                                                                                                                                                                                                                                                                                                                                                                                                                                                                                                                                                                                                                                                             |                                                                                                                                                                                                                                                                                                                                                                                                                                              |                                                                                                                                                                                                                                                               |
|-----------|-----------|-------|--------------|----------|-------------------|---------|--------------------------------------------------------------------------------------------------------------------------------------------------------------------------------------------------------------------------------------------------------------------------------------------------|-----------|-------------------------|-------|-------|--------------------------------------------------------------------------------------------------------------------------------------------------|-------------------------------------------------------------------------------------------------------------------------------------------------------------------------------------------------------------------------------------------------------------------------------------------------------------------------------------------------------------------------------------------------------------------------------------------------------------------------------------------------------------------------------------------------------------------------------------------------------------------------------------------------------------------------------------------------------------|----------------------------------------------------------------------------------------------------------------------------------------------------------------------------------------------------------------------------------------------------------------------------------------------------------------------------------------------------------------------------------------------------------------------------------------------|---------------------------------------------------------------------------------------------------------------------------------------------------------------------------------------------------------------------------------------------------------------|
| 218373_at | NM_022476 | AKTIP | Homo sapiens | 6-Oct-14 | Exemplar sequence | GenBank | gb:NM_022476.1 /DEF=Homo sapiens hypothetical protein FLJ13258 similar to fused toes (FLJ13258), mRNA. /FEA=mRNA /GEN=FLJ13258 /PROD=hypothetical protein FLJ13258 similar to fusedtoes /DB_XREF=gi:1968026 /UG=Hs.288929 hypothetical protein FLJ13258 similar to fused toes /FL=gb:NM_022476.1 | NM_022476 | AKT interacting protein | AKTIP | 64400 | NM_001012398<br>/// NM_022476<br>///<br>XM_005256094<br>///<br>XM_005256095<br>///<br>XM_005256096<br>///<br>XM_005256097<br>///<br>XM_005256098 | 0001934 // positive regulation of protein phosphorylation //<br>inferred from direct assay<br>/// 0006810 // transport<br>// inferred from electronic annotation<br>/// 0006915 // apoptotic process //<br>inferred from electronic annotation<br>/// 0007032 // endosome organization //<br>inferred from mutant phenotype<br>/// 0007040 // lysosome organization //<br>inferred from mutant phenotype<br>/// 0008152 // metabolic process //<br>inferred from electronic annotation<br>/// 0008333 // endosome to lysosome transport //<br>inferred from mutant phenotype<br>/// 0015031 // protein transport //<br>inferred from electronic annotation<br>/// 0032092 // positive regulation of protein | 0005730 // nucleolus //<br>inferred from direct assay<br>///<br>0005737 // cytoplasm //<br>inferred from electronic annotation<br>///<br>0005737 // cytoplasm //<br>inferred from direct assay<br>///<br>0005794 // Golgi apparatus //<br>inferred from direct assay<br>///<br>0005886 // plasma membrane //<br>inferred from direct assay<br>///<br>0016020 // membrane //<br>inferred from electronic annotation<br>///<br>0030897 // HOPS | 0005515 // protein binding //<br>inferred from physical interaction<br>/// 0016881 // acid-amino acid ligase activity<br>// inferred from electronic annotation<br>/// 0019787 // small conjugating protein ligase activity // non-traceable author statement |
|-----------|-----------|-------|--------------|----------|-------------------|---------|--------------------------------------------------------------------------------------------------------------------------------------------------------------------------------------------------------------------------------------------------------------------------------------------------|-----------|-------------------------|-------|-------|--------------------------------------------------------------------------------------------------------------------------------------------------|-------------------------------------------------------------------------------------------------------------------------------------------------------------------------------------------------------------------------------------------------------------------------------------------------------------------------------------------------------------------------------------------------------------------------------------------------------------------------------------------------------------------------------------------------------------------------------------------------------------------------------------------------------------------------------------------------------------|----------------------------------------------------------------------------------------------------------------------------------------------------------------------------------------------------------------------------------------------------------------------------------------------------------------------------------------------------------------------------------------------------------------------------------------------|---------------------------------------------------------------------------------------------------------------------------------------------------------------------------------------------------------------------------------------------------------------|



|           |           |        |              |          |                   |         |                                                                                                                                                                                                                                              |           |                                            |        |       |                               |                                                                                                                                                                                                                                                                                                                                                                                                   |                                                                                                                                                                                                                                                                                                                                                                                                                       |                                                                                                                                        |
|-----------|-----------|--------|--------------|----------|-------------------|---------|----------------------------------------------------------------------------------------------------------------------------------------------------------------------------------------------------------------------------------------------|-----------|--------------------------------------------|--------|-------|-------------------------------|---------------------------------------------------------------------------------------------------------------------------------------------------------------------------------------------------------------------------------------------------------------------------------------------------------------------------------------------------------------------------------------------------|-----------------------------------------------------------------------------------------------------------------------------------------------------------------------------------------------------------------------------------------------------------------------------------------------------------------------------------------------------------------------------------------------------------------------|----------------------------------------------------------------------------------------------------------------------------------------|
| 218507_at | NM_013332 | HILPDA | Homo sapiens | 6-Oct-14 | Exemplar sequence | GenBank | gb:NM_013332.1 /DEF=Homo sapiens hypoxia-inducible protein 2 (HIG2), mRNA. /FEA=mRNA /GEN=HIG2 /PROD=hypoxia-inducible protein 2 /DB_XREF=gi:7019408 /UG=Hs.61762 hypoxia-inducible protein 2 /FL=gb:BC001863.1 gb:AF144755.1 gb:NM_013332.1 | NM_013332 | hypoxia inducible lipid droplet-associated | HILPDA | 29923 | NM_001098786<br>/// NM_013332 | 0001819 // positive regulation of cytokine production // inferred from direct assay /// 0006950 // response to stress // non-traceable author statement /// 0008284 // positive regulation of cell proliferation // inferred from direct assay /// 0010884 // positive regulation of lipid storage // inferred from direct assay /// 0035425 // autocrine signaling // inferred from direct assay | 0005576 // extracellular region // inferred from electronic annotation /// 0005615 // extracellular space // inferred from direct assay /// 0005811 // lipid particle // inferred from direct assay /// 0009986 // cell surface // inferred from direct assay /// 0016020 // membrane // inferred from electronic annotation /// 0016021 // integral component of membrane // inferred from electronic annotation /// | 0005102 // receptor binding // inferred from physical interaction /// 0005515 // protein binding // inferred from physical interaction |
|-----------|-----------|--------|--------------|----------|-------------------|---------|----------------------------------------------------------------------------------------------------------------------------------------------------------------------------------------------------------------------------------------------|-----------|--------------------------------------------|--------|-------|-------------------------------|---------------------------------------------------------------------------------------------------------------------------------------------------------------------------------------------------------------------------------------------------------------------------------------------------------------------------------------------------------------------------------------------------|-----------------------------------------------------------------------------------------------------------------------------------------------------------------------------------------------------------------------------------------------------------------------------------------------------------------------------------------------------------------------------------------------------------------------|----------------------------------------------------------------------------------------------------------------------------------------|

|             |           |       |              |          |                   |         |                                                                                                                                                                                                                                |           |                                  |       |       |                                                                                                                                                                                                                                                                                                                                                                     |                                                                                                                                                                                                                                                                                                                                                                                                                                                                             |                                                                                                                                                                                                    |                                                                                                                                                                                                                                                                                                                                                                                                                                                                                                                                                                           |
|-------------|-----------|-------|--------------|----------|-------------------|---------|--------------------------------------------------------------------------------------------------------------------------------------------------------------------------------------------------------------------------------|-----------|----------------------------------|-------|-------|---------------------------------------------------------------------------------------------------------------------------------------------------------------------------------------------------------------------------------------------------------------------------------------------------------------------------------------------------------------------|-----------------------------------------------------------------------------------------------------------------------------------------------------------------------------------------------------------------------------------------------------------------------------------------------------------------------------------------------------------------------------------------------------------------------------------------------------------------------------|----------------------------------------------------------------------------------------------------------------------------------------------------------------------------------------------------|---------------------------------------------------------------------------------------------------------------------------------------------------------------------------------------------------------------------------------------------------------------------------------------------------------------------------------------------------------------------------------------------------------------------------------------------------------------------------------------------------------------------------------------------------------------------------|
| 218533_s_at | NM_017859 | UCKL1 | Homo sapiens | 6-Oct-14 | Exemplar sequence | GenBank | gb:NM_017859.1 /DEF=Homo sapiens hypothetical protein FLJ20517 (FLJ20517), mRNA. /FEA=mRNA /GEN=FLJ20517 /PROD=hypothetical protein FLJ20517 /DB_XREF=gi:8923486 /UG=Hs.39850 hypothetical protein FLJ20517 /FL=gb:NM_017859.1 | NM_017859 | uridine-cytidine kinase 1-like 1 | UCKL1 | 54963 | NM_001193379<br>/// NM_017859<br>///<br>XM_005260216<br>///<br>XM_006723806<br>///<br>XM_006723807<br>///<br>XM_006723808<br>///<br>XM_006723809<br>///<br>XM_006723810<br>///<br>XM_006723811<br>///<br>XM_006723812<br>///<br>XM_006723813<br>/// XR_244120 ///<br>XR_244121 ///<br>XR_430299 ///<br>XR_430300 ///<br>XR_430301 ///<br>XR_430302 ///<br>XR_430303 | 0008152 // metabolic process // inferred from electronic annotation ///<br>0016032 // viral process // inferred from electronic annotation ///<br>0016310 // phosphorylation // inferred from electronic annotation ///<br>0019048 // modulation by virus of host morphology or physiology // inferred from electronic annotation ///<br>0044206 // UMP salvage // inferred from electronic annotation ///<br>0044211 // CTP salvage // inferred from electronic annotation | 0005634 // nucleus // inferred from electronic annotation ///<br>0005737 // cytoplasm // inferred from electronic annotation ///<br>0005783 // endoplasmic reticulum // inferred from direct assay | 0000166 // nucleotide binding // inferred from electronic annotation ///<br>0004849 // uridine kinase activity // inferred from electronic annotation ///<br>0005515 // protein binding // inferred from physical interaction ///<br>0005524 // ATP binding // inferred from electronic annotation ///<br>0016301 // kinase activity // inferred from electronic annotation ///<br>0016740 // transferase activity // inferred from electronic annotation ///<br>0016773 // phosphotransferase activity, alcohol group as acceptor // inferred from electronic annotation |
|-------------|-----------|-------|--------------|----------|-------------------|---------|--------------------------------------------------------------------------------------------------------------------------------------------------------------------------------------------------------------------------------|-----------|----------------------------------|-------|-------|---------------------------------------------------------------------------------------------------------------------------------------------------------------------------------------------------------------------------------------------------------------------------------------------------------------------------------------------------------------------|-----------------------------------------------------------------------------------------------------------------------------------------------------------------------------------------------------------------------------------------------------------------------------------------------------------------------------------------------------------------------------------------------------------------------------------------------------------------------------|----------------------------------------------------------------------------------------------------------------------------------------------------------------------------------------------------|---------------------------------------------------------------------------------------------------------------------------------------------------------------------------------------------------------------------------------------------------------------------------------------------------------------------------------------------------------------------------------------------------------------------------------------------------------------------------------------------------------------------------------------------------------------------------|

|           |           |       |              |          |                   |         |                                                                                                                                                                                                                                            |           |                    |       |       |                            |                                                                                                                                                                                                                                                                                                                                                                 |                                                                                                                                                                                                                                                                                                                                           |                                                                  |
|-----------|-----------|-------|--------------|----------|-------------------|---------|--------------------------------------------------------------------------------------------------------------------------------------------------------------------------------------------------------------------------------------------|-----------|--------------------|-------|-------|----------------------------|-----------------------------------------------------------------------------------------------------------------------------------------------------------------------------------------------------------------------------------------------------------------------------------------------------------------------------------------------------------------|-------------------------------------------------------------------------------------------------------------------------------------------------------------------------------------------------------------------------------------------------------------------------------------------------------------------------------------------|------------------------------------------------------------------|
| 218598_at | NM_021930 | RINT1 | Homo sapiens | 6-Oct-14 | Exemplar sequence | GenBank | gb:NM_021930.1 /DEF=Homo sapiens hypothetical protein FLJ11785 (FLJ11785), mRNA. /FEA=mRNA /GEN=FLJ11785 /PROD=hypothetical protein FLJ11785 /DB_XREF=gi:1345465 /UG=Hs.44625 Rad50-interacting protein 1 /FL=gb:NM_021930.1 gb:AF317622.1 | NM_021930 | RAD50 interactor 1 | RINT1 | 60561 | NM_021930 /// XM_005250524 | 0006810 // transport // inferred from electronic annotation /// 0007049 // cell cycle // inferred from electronic annotation /// 0015031 // protein transport // inferred from electronic annotation /// 0016192 // vesicle-mediated transport // inferred from electronic annotation /// 0031572 // G2 DNA damage checkpoint // inferred from mutant phenotype | 0005737 // cytoplasm // inferred from electronic annotation /// 0005737 // cytoplasm // inferred from direct assay /// 0005783 // endoplasmic reticulum // inferred from direct assay /// 0005789 // endoplasmic reticulum membrane // inferred from electronic annotation /// 0016020 // membrane // inferred from electronic annotation | 0005515 // protein binding // inferred from physical interaction |
|-----------|-----------|-------|--------------|----------|-------------------|---------|--------------------------------------------------------------------------------------------------------------------------------------------------------------------------------------------------------------------------------------------|-----------|--------------------|-------|-------|----------------------------|-----------------------------------------------------------------------------------------------------------------------------------------------------------------------------------------------------------------------------------------------------------------------------------------------------------------------------------------------------------------|-------------------------------------------------------------------------------------------------------------------------------------------------------------------------------------------------------------------------------------------------------------------------------------------------------------------------------------------|------------------------------------------------------------------|

|           |           |      |              |          |                   |         |                                                                                                                                                                                                                                               |           |                                         |      |       |                                                                       |                                                                                                                                                                                                                                                                                                                                                                                                                                                                                                                               |                                                                                                                                                                                                                                                                                                                                                                                                                           |                                                                                                                                                                                                                   |
|-----------|-----------|------|--------------|----------|-------------------|---------|-----------------------------------------------------------------------------------------------------------------------------------------------------------------------------------------------------------------------------------------------|-----------|-----------------------------------------|------|-------|-----------------------------------------------------------------------|-------------------------------------------------------------------------------------------------------------------------------------------------------------------------------------------------------------------------------------------------------------------------------------------------------------------------------------------------------------------------------------------------------------------------------------------------------------------------------------------------------------------------------|---------------------------------------------------------------------------------------------------------------------------------------------------------------------------------------------------------------------------------------------------------------------------------------------------------------------------------------------------------------------------------------------------------------------------|-------------------------------------------------------------------------------------------------------------------------------------------------------------------------------------------------------------------|
| 218781_at | NM_024624 | SMC6 | Homo sapiens | 6-Oct-14 | Exemplar sequence | GenBank | gb:NM_024624.1 /DEF=Homo sapiens hypothetical protein FLJ22116 (FLJ22116), mRNA. /FEA=mRNA /GEN=FLJ22116 /PROD=hypothetical protein FLJ22116 /DB_XREF=gi:13375847 /UG=Hs.34497 hypothetical protein FLJ22116 /FL=gb:AL136544.1 gb:NM_024624.1 | NM_024624 | structural maintenance of chromosomes 6 | SMC6 | 79677 | NM_001142286<br>/// NM_024624<br>/// XM_005262628<br>/// XM_006712103 | 0000722 // telomere maintenance via recombination // inferred from mutant phenotype<br>/// 0000724 // double-strand break repair via homologous recombination // inferred from electronic annotation<br>/// 0006281 // DNA repair // inferred from electronic annotation<br>/// 0006310 // DNA recombination // inferred from electronic annotation<br>/// 0006974 // cellular response to DNA damage stimulus // inferred from electronic annotation<br>/// 0090398 // cellular senescence // inferred from mutant phenotype | 0000781 // chromosome, telomeric region // inferred from direct assay<br>/// 0005622 // intracellular // inferred from direct assay<br>/// 0005634 // nucleus // inferred from direct assay<br>/// 0005694 // chromosome // inferred from electronic annotation<br>/// 0005730 // nucleolus // inferred from direct assay<br>/// 0016605 // PML body // inferred from direct assay<br>/// 0030915 // Smc5-Smc6 complex // | 0000166 // nucleotide binding // inferred from electronic annotation<br>/// 0005515 // protein binding // inferred from physical interaction<br>/// 0005524 // ATP binding // inferred from electronic annotation |
|-----------|-----------|------|--------------|----------|-------------------|---------|-----------------------------------------------------------------------------------------------------------------------------------------------------------------------------------------------------------------------------------------------|-----------|-----------------------------------------|------|-------|-----------------------------------------------------------------------|-------------------------------------------------------------------------------------------------------------------------------------------------------------------------------------------------------------------------------------------------------------------------------------------------------------------------------------------------------------------------------------------------------------------------------------------------------------------------------------------------------------------------------|---------------------------------------------------------------------------------------------------------------------------------------------------------------------------------------------------------------------------------------------------------------------------------------------------------------------------------------------------------------------------------------------------------------------------|-------------------------------------------------------------------------------------------------------------------------------------------------------------------------------------------------------------------|

|             |           |         |              |          |                   |         |                                                                                                                                                                                                                                 |           |                                    |         |       |           |  |  |  |
|-------------|-----------|---------|--------------|----------|-------------------|---------|---------------------------------------------------------------------------------------------------------------------------------------------------------------------------------------------------------------------------------|-----------|------------------------------------|---------|-------|-----------|--|--|--|
| 218904_s_at | NM_017998 | C9orf40 | Homo sapiens | 6-Oct-14 | Exemplar sequence | GenBank | gb:NM_017998.1 /DEF=Homo sapiens hypothetical protein FLJ10110 (FLJ10110), mRNA. /FEA=mRNA /GEN=FLJ10110 /PROD=hypothetical protein FLJ10110 /DB_XREF=gi:8922232 /UG=Hs.264363 hypothetical protein FLJ10110 /FL=gb:NM_017998.1 | NM_017998 | chromosome 9 open reading frame 40 | C9orf40 | 55071 | NM_017998 |  |  |  |
|-------------|-----------|---------|--------------|----------|-------------------|---------|---------------------------------------------------------------------------------------------------------------------------------------------------------------------------------------------------------------------------------|-----------|------------------------------------|---------|-------|-----------|--|--|--|

|           |           |       |              |          |                   |         |                                                                                                                                                                                                                    |           |                     |       |       |                                             |                                                                                                                                                                                                                                                                                                                                                                                                                                                                                                                                                                                                                                                       |                                                                     |
|-----------|-----------|-------|--------------|----------|-------------------|---------|--------------------------------------------------------------------------------------------------------------------------------------------------------------------------------------------------------------------|-----------|---------------------|-------|-------|---------------------------------------------|-------------------------------------------------------------------------------------------------------------------------------------------------------------------------------------------------------------------------------------------------------------------------------------------------------------------------------------------------------------------------------------------------------------------------------------------------------------------------------------------------------------------------------------------------------------------------------------------------------------------------------------------------------|---------------------------------------------------------------------|
| 219014_at | NM_016619 | PLAC8 | Homo sapiens | 6-Oct-14 | Exemplar sequence | GenBank | gb:NM_016619.1 /DEF=Homo sapiens hypothetical protein (LOC51316), mRNA. /FEA=mRNA /GEN=LOC51316 /PROD=hypothetical protein /DB_XREF=gi:7706157 /UG=Hs.107139 hypothetical protein /FL=gb:AF208846.1 gb:NM_016619.1 | NM_016619 | placenta-specific 8 | PLAC8 | 51316 | NM_001130715 /// NM_001130716 /// NM_016619 | 0008284 // positive regulation of cell proliferation // inferred from electronic annotation /// 0009409 // response to cold // inferred from electronic annotation /// 0040015 // negative regulation of multicellular organism growth // inferred from electronic annotation /// 0042742 // defense response to bacterium // inferred from electronic annotation /// 0043066 // negative regulation of apoptotic process // inferred from electronic annotation /// 0045944 // positive regulation of transcription from RNA polymerase II promoter // inferred from electronic annotation /// 0050873 // brown fat cell differentiation // inferred | 0003682 // chromatin binding // inferred from electronic annotation |
|-----------|-----------|-------|--------------|----------|-------------------|---------|--------------------------------------------------------------------------------------------------------------------------------------------------------------------------------------------------------------------|-----------|---------------------|-------|-------|---------------------------------------------|-------------------------------------------------------------------------------------------------------------------------------------------------------------------------------------------------------------------------------------------------------------------------------------------------------------------------------------------------------------------------------------------------------------------------------------------------------------------------------------------------------------------------------------------------------------------------------------------------------------------------------------------------------|---------------------------------------------------------------------|

|           |           |       |              |          |                   |         |                                                                                                                                                                                                    |           |                                                     |       |       |           |  |                                                                                                                                                                    |  |
|-----------|-----------|-------|--------------|----------|-------------------|---------|----------------------------------------------------------------------------------------------------------------------------------------------------------------------------------------------------|-----------|-----------------------------------------------------|-------|-------|-----------|--|--------------------------------------------------------------------------------------------------------------------------------------------------------------------|--|
| 219037_at | NM_016052 | RRP15 | Homo sapiens | 6-Oct-14 | Exemplar sequence | GenBank | gb:NM_016052.1 /DEF=Homo sapiens CGI-115 protein (LOC51018), mRNA. /FEA=mRNA /GEN=LOC51018 /PROD=CGI-115 protein /DB_XREF=gi:7705619 /UG=Hs.56043 CGI-115 protein /FL=gb:AF151873.1 gb:NM_016052.1 | NM_016052 | ribosomal RNA processing 15 homolog (S. cerevisiae) | RRP15 | 51018 | NM_016052 |  | 0005634 // nucleus // inferred from direct assay /// 0005730 // nucleolus // inferred from direct assay /// 0005739 // mitochondrion // inferred from direct assay |  |
|-----------|-----------|-------|--------------|----------|-------------------|---------|----------------------------------------------------------------------------------------------------------------------------------------------------------------------------------------------------|-----------|-----------------------------------------------------|-------|-------|-----------|--|--------------------------------------------------------------------------------------------------------------------------------------------------------------------|--|

|             |           |      |              |          |                   |         |                                                                                                                                                                                                                                 |           |                        |      |       |                                                                                                                |                                                                                                                                                                                                                                                                                                                                                                                                                                                                                                                                                                                                                                     |                                                                                                                                                                                 |                                                                                                                                                                                                                                                                                                    |
|-------------|-----------|------|--------------|----------|-------------------|---------|---------------------------------------------------------------------------------------------------------------------------------------------------------------------------------------------------------------------------------|-----------|------------------------|------|-------|----------------------------------------------------------------------------------------------------------------|-------------------------------------------------------------------------------------------------------------------------------------------------------------------------------------------------------------------------------------------------------------------------------------------------------------------------------------------------------------------------------------------------------------------------------------------------------------------------------------------------------------------------------------------------------------------------------------------------------------------------------------|---------------------------------------------------------------------------------------------------------------------------------------------------------------------------------|----------------------------------------------------------------------------------------------------------------------------------------------------------------------------------------------------------------------------------------------------------------------------------------------------|
| 219168_s_at | NM_017701 | PRR5 | Homo sapiens | 6-Oct-14 | Exemplar sequence | GenBank | gb:NM_017701.1 /DEF=Homo sapiens hypothetical protein FLJ20185 (FLJ20185), mRNA. /FEA=mRNA /GEN=FLJ20185 /PROD=hypothetical protein FLJ20185 /DB_XREF=gi:8923174 /UG=Hs.272972 hypothetical protein FLJ20185 /FL=gb:NM_017701.1 | NM_017701 | proline rich 5 (renal) | PRR5 | 55615 | NM_001017528 ///<br>NM_001017529 ///<br>NM_001017530 ///<br>NM_001198721 ///<br>NM_015366 ///<br>NM_181333 /// | 0001934 // positive regulation of protein phosphorylation // inferred from electronic annotation /// 0007049 // cell cycle // inferred from electronic annotation /// 0007165 // signal transduction // inferred from electronic annotation /// 0007264 // small GTPase mediated signal transduction // traceable author statement /// 0014068 // positive regulation of phosphatidylinositol 3-kinase signaling // inferred from electronic annotation /// 0030036 // actin cytoskeleton organization // inferred from direct assay /// 0030335 // positive regulation of cell migration // inferred from direct assay /// 0032321 | 0005622 // intracellular // inferred from electronic annotation /// 0005829 // cytosol // traceable author statement /// 0031932 // TORC2 complex // inferred from direct assay | 0005096 // GTPase activator activity // inferred from electronic annotation /// 0005096 // GTPase activator activity // inferred from direct assay /// 0005100 // Rho GTPase activator activity // inferred from direct assay /// 0005515 // protein binding // inferred from physical interaction |
|-------------|-----------|------|--------------|----------|-------------------|---------|---------------------------------------------------------------------------------------------------------------------------------------------------------------------------------------------------------------------------------|-----------|------------------------|------|-------|----------------------------------------------------------------------------------------------------------------|-------------------------------------------------------------------------------------------------------------------------------------------------------------------------------------------------------------------------------------------------------------------------------------------------------------------------------------------------------------------------------------------------------------------------------------------------------------------------------------------------------------------------------------------------------------------------------------------------------------------------------------|---------------------------------------------------------------------------------------------------------------------------------------------------------------------------------|----------------------------------------------------------------------------------------------------------------------------------------------------------------------------------------------------------------------------------------------------------------------------------------------------|



|             |           |         |              |          |                   |         |                                                                                                                                                                                                                                 |           |                                    |         |       |                                                                                                                                                                                                                                                           |                                                                                                                                               |                                                                                                                                                                                                                    |                                                                                             |
|-------------|-----------|---------|--------------|----------|-------------------|---------|---------------------------------------------------------------------------------------------------------------------------------------------------------------------------------------------------------------------------------|-----------|------------------------------------|---------|-------|-----------------------------------------------------------------------------------------------------------------------------------------------------------------------------------------------------------------------------------------------------------|-----------------------------------------------------------------------------------------------------------------------------------------------|--------------------------------------------------------------------------------------------------------------------------------------------------------------------------------------------------------------------|---------------------------------------------------------------------------------------------|
| 219175_s_at | NM_017836 | SLC41A3 | Homo sapiens | 6-Oct-14 | Exemplar sequence | GenBank | gb:NM_017836.1 /DEF=Homo sapiens hypothetical protein FLJ20473 (FLJ20473), mRNA. /FEA=mRNA /GEN=FLJ20473 /PROD=hypothetical protein FLJ20473 /DB_XREF=gi:8923438 /UG=Hs.330592 hypothetical protein FLJ20473 /FL=gb:NM_017836.1 | NM_017836 | solute carrier family 41, member 3 | SLC41A3 | 54946 | NM_001008485 ///<br>NM_001008486 ///<br>NM_001008487 ///<br>NM_001164475 ///<br>NM_017836 ///<br>XM_005247559 ///<br>XM_005247560 ///<br>XM_005247561 ///<br>XM_005247562 ///<br>XM_005247563 ///<br>XM_005247564 ///<br>XM_005247565 ///<br>XM_006713681 | 0006812 // cation transport // inferred from electronic annotation ///<br>0008152 // metabolic process // inferred from electronic annotation | 0005886 // plasma membrane // inferred from direct assay ///<br>0016020 // membrane // inferred from electronic annotation ///<br>0016021 // integral component of membrane // inferred from electronic annotation | 0008324 // cation transmembrane transporter activity // inferred from electronic annotation |
|-------------|-----------|---------|--------------|----------|-------------------|---------|---------------------------------------------------------------------------------------------------------------------------------------------------------------------------------------------------------------------------------|-----------|------------------------------------|---------|-------|-----------------------------------------------------------------------------------------------------------------------------------------------------------------------------------------------------------------------------------------------------------|-----------------------------------------------------------------------------------------------------------------------------------------------|--------------------------------------------------------------------------------------------------------------------------------------------------------------------------------------------------------------------|---------------------------------------------------------------------------------------------|

|           |           |        |              |          |                   |         |                                                                                                                                                                                                                                                                                                    |           |                                                                                                                  |        |       |                                                                       |                                                                                                                                                                                                                                                                                                                                                                                                                                                                                                                                                                                                                                                  |                                                                                                                                                                                                              |                                                                                                                                          |
|-----------|-----------|--------|--------------|----------|-------------------|---------|----------------------------------------------------------------------------------------------------------------------------------------------------------------------------------------------------------------------------------------------------------------------------------------------------|-----------|------------------------------------------------------------------------------------------------------------------|--------|-------|-----------------------------------------------------------------------|--------------------------------------------------------------------------------------------------------------------------------------------------------------------------------------------------------------------------------------------------------------------------------------------------------------------------------------------------------------------------------------------------------------------------------------------------------------------------------------------------------------------------------------------------------------------------------------------------------------------------------------------------|--------------------------------------------------------------------------------------------------------------------------------------------------------------------------------------------------------------|------------------------------------------------------------------------------------------------------------------------------------------|
| 219259_at | NM_022367 | SEMA4A | Homo sapiens | 6-Oct-14 | Exemplar sequence | GenBank | gb:NM_022367.1 /DEF=Homo sapiens hypothetical protein FLJ12287 similar to semaphorins (FLJ12287), mRNA. /FEA=mRNA /GEN=FLJ12287 /PROD=hypothetical protein FLJ12287 similar to semaphorins /DB_XREF=gi:1641290 /UG=Hs.7634 hypothetical protein FLJ12287 similar to semaphorins /FL=gb:NM_022367.1 | NM_022367 | sema domain, immunoglobulin domain (Ig), transmembrane domain (TM) and short cytoplasmic domain, (semaphorin) 4A | SEMA4A | 64218 | NM_001193300 ///<br>NM_001193301 ///<br>NM_001193302 ///<br>NM_022367 | 0001525 // angiogenesis // inferred from electronic annotation /// 0002292 // T cell differentiation involved in immune response // inferred from electronic annotation /// 0002376 // immune system process // inferred from electronic annotation /// 0007275 // multicellular organismal development // inferred from electronic annotation /// 0007399 // nervous system development // inferred from electronic annotation /// 0007409 // axonogenesis // inferred from electronic annotation /// 0007411 // axon guidance // traceable author statement /// 0008360 // regulation of cell shape // inferred from electronic annotation /// | 0005886 // plasma membrane // traceable author statement /// 0016020 // membrane // inferred from electronic annotation /// 0016021 // integral component of membrane // inferred from electronic annotation | 0004872 // receptor activity // inferred from electronic annotation /// 0005515 // protein binding // inferred from physical interaction |
|-----------|-----------|--------|--------------|----------|-------------------|---------|----------------------------------------------------------------------------------------------------------------------------------------------------------------------------------------------------------------------------------------------------------------------------------------------------|-----------|------------------------------------------------------------------------------------------------------------------|--------|-------|-----------------------------------------------------------------------|--------------------------------------------------------------------------------------------------------------------------------------------------------------------------------------------------------------------------------------------------------------------------------------------------------------------------------------------------------------------------------------------------------------------------------------------------------------------------------------------------------------------------------------------------------------------------------------------------------------------------------------------------|--------------------------------------------------------------------------------------------------------------------------------------------------------------------------------------------------------------|------------------------------------------------------------------------------------------------------------------------------------------|

|           |           |        |              |          |                   |         |                                                                                                                                                                                    |           |                                      |        |       |                                          |                                                                                                                                                                                                             |                                                                                                                                                                                                                                                                                                                                                                    |                                                                      |
|-----------|-----------|--------|--------------|----------|-------------------|---------|------------------------------------------------------------------------------------------------------------------------------------------------------------------------------------|-----------|--------------------------------------|--------|-------|------------------------------------------|-------------------------------------------------------------------------------------------------------------------------------------------------------------------------------------------------------------|--------------------------------------------------------------------------------------------------------------------------------------------------------------------------------------------------------------------------------------------------------------------------------------------------------------------------------------------------------------------|----------------------------------------------------------------------|
| 219416_at | NM_016240 | SCARA3 | Homo sapiens | 6-Oct-14 | Exemplar sequence | GenBank | gb:NM_016240.1 /DEF=Homo sapiens CSR1 protein (CSR1), mRNA. /FEA=mRNA /GEN=CSR1 /PROD=CSR1 protein /DB_XREF=gi:7705335 /UG=Hs.128856 CSR1 protein /FL=gb:AB007829.1 gb:NM_016240.1 | NM_016240 | scavenger receptor class A, member 3 | SCARA3 | 51435 | NM_016240 /// NM_182826 /// XM_005273527 | 0006898 // receptor-mediated endocytosis // traceable author statement /// 0006979 // response to oxidative stress // traceable author statement /// 0009650 // UV protection // traceable author statement | 0000139 // Golgi membrane // inferred from electronic annotation /// 0005581 // collagen trimer // inferred from electronic annotation /// 0005783 // endoplasmic reticulum // inferred from electronic annotation /// 0005789 // endoplasmic reticulum membrane // inferred from electronic annotation /// 0005794 // Golgi apparatus // inferred from electronic | 0005044 // scavenger receptor activity // traceable author statement |
|-----------|-----------|--------|--------------|----------|-------------------|---------|------------------------------------------------------------------------------------------------------------------------------------------------------------------------------------|-----------|--------------------------------------|--------|-------|------------------------------------------|-------------------------------------------------------------------------------------------------------------------------------------------------------------------------------------------------------------|--------------------------------------------------------------------------------------------------------------------------------------------------------------------------------------------------------------------------------------------------------------------------------------------------------------------------------------------------------------------|----------------------------------------------------------------------|

|           |           |       |              |          |                   |         |                                                                                                                                                                                                                                  |           |                                                                           |                   |                  |                                                           |                                                                                                                                                                                                                                                                                                                                                                                                                                                                                                                                                                                                                                                   |                                                                                                                                                                                                                                                                                     |                                                                                                                                                                                                               |
|-----------|-----------|-------|--------------|----------|-------------------|---------|----------------------------------------------------------------------------------------------------------------------------------------------------------------------------------------------------------------------------------|-----------|---------------------------------------------------------------------------|-------------------|------------------|-----------------------------------------------------------|---------------------------------------------------------------------------------------------------------------------------------------------------------------------------------------------------------------------------------------------------------------------------------------------------------------------------------------------------------------------------------------------------------------------------------------------------------------------------------------------------------------------------------------------------------------------------------------------------------------------------------------------------|-------------------------------------------------------------------------------------------------------------------------------------------------------------------------------------------------------------------------------------------------------------------------------------|---------------------------------------------------------------------------------------------------------------------------------------------------------------------------------------------------------------|
| 219418_at | NM_024782 | NHEJ1 | Homo sapiens | 6-Oct-14 | Exemplar sequence | GenBank | gb:NM_024782.1 /DEF=Homo sapiens hypothetical protein FLJ12610 (FLJ12610), mRNA. /FEA=mRNA /GEN=FLJ12610 /PROD=hypothetical protein FLJ12610 /DB_XREF=gi:13376141 /UG=Hs.146139 hypothetical protein FLJ12610 /FL=gb:NM_024782.1 | NM_024782 | nonhomologous end-joining factor 1 /// solute carrier family 23, member 3 | NHEJ1 /// SLC23A3 | 79840 /// 151295 | NM_001144889 /// NM_001144890 /// NM_024782 /// NM_144712 | 0006281 // DNA repair // inferred from electronic annotation /// 0006302 // double-strand break repair // inferred from electronic annotation /// 0006303 // double-strand break repair via nonhomologous end joining // inferred from mutant phenotype /// 0006310 // DNA recombination // inferred from electronic annotation /// 0006810 // transport // inferred from electronic annotation /// 0006974 // cellular response to DNA damage stimulus // inferred from electronic annotation /// 0007417 // central nervous system development // non-traceable author statement /// 0010212 // response to ionizing radiation // inferred from | 0005634 // nucleus // inferred from direct assay /// 0016020 // membrane // inferred from electronic annotation /// 0016021 // integral component of membrane // inferred from electronic annotation /// 0070419 // nonhomologous end joining complex // inferred from direct assay | 0003677 // DNA binding // inferred from electronic annotation /// 0005215 // transporter activity // inferred from electronic annotation /// 0005515 // protein binding // inferred from physical interaction |
|-----------|-----------|-------|--------------|----------|-------------------|---------|----------------------------------------------------------------------------------------------------------------------------------------------------------------------------------------------------------------------------------|-----------|---------------------------------------------------------------------------|-------------------|------------------|-----------------------------------------------------------|---------------------------------------------------------------------------------------------------------------------------------------------------------------------------------------------------------------------------------------------------------------------------------------------------------------------------------------------------------------------------------------------------------------------------------------------------------------------------------------------------------------------------------------------------------------------------------------------------------------------------------------------------|-------------------------------------------------------------------------------------------------------------------------------------------------------------------------------------------------------------------------------------------------------------------------------------|---------------------------------------------------------------------------------------------------------------------------------------------------------------------------------------------------------------|

|           |        |      |              |          |                    |         |                                                                                                                                                                                                                                                                                                                                                               |        |       |      |       |                               |                                                                                                                                                                                                                                                                                                                                                                                                                                                                                                                                                    |                                                                                                                                                                                                                                                                                                                                                                                           |                                                                                                                                                                                                                                               |
|-----------|--------|------|--------------|----------|--------------------|---------|---------------------------------------------------------------------------------------------------------------------------------------------------------------------------------------------------------------------------------------------------------------------------------------------------------------------------------------------------------------|--------|-------|------|-------|-------------------------------|----------------------------------------------------------------------------------------------------------------------------------------------------------------------------------------------------------------------------------------------------------------------------------------------------------------------------------------------------------------------------------------------------------------------------------------------------------------------------------------------------------------------------------------------------|-------------------------------------------------------------------------------------------------------------------------------------------------------------------------------------------------------------------------------------------------------------------------------------------------------------------------------------------------------------------------------------------|-----------------------------------------------------------------------------------------------------------------------------------------------------------------------------------------------------------------------------------------------|
| 219422_at | U72763 | ESPN | Homo sapiens | 6-Oct-14 | Consensus sequence | GenBank | Consensus includes<br>gb:U72763.1<br>/DEF=Human death receptor 3 (DR3) mRNA, complete cds.<br>/FEA=CDS<br>/GEN=DR3<br>/PROD=death receptor 3<br>/DB_XREF=gi:1669511<br>/UG=Hs.180338 tumor necrosis factor receptor superfamily, member 12 (translocating chain-association membrane protein)<br>/FL=gb:U72763.1<br>gb:U74611.1<br>gb:U78029.1<br>gb:U94501.1 | U72763 | espin | ESPN | 83715 | NM_031475 ///<br>XM_005263501 | 0007605 // sensory perception of sound // inferred from electronic annotation /// 0007626 // locomotory behavior // inferred from electronic annotation /// 0030046 // parallel actin filament bundle assembly // inferred from electronic annotation /// 0051017 // actin filament bundle assembly // inferred from electronic annotation /// 0051491 // positive regulation of filopodium assembly // inferred from electronic annotation /// 0051494 // negative regulation of cytoskeleton organization // inferred from electronic annotation | 0005737 // cytoplasm // inferred from electronic annotation /// 0005856 // cytoskeleton // inferred from electronic annotation /// 0005902 // microvillus // inferred from electronic annotation /// 0005903 // brush border // inferred from sequence or structural similarity /// 0015629 // actin cytoskeleton // inferred from electronic annotation /// 0031941 // filamentous actin | 0003779 // actin binding // inferred from electronic annotation /// 0017124 // SH3 domain binding // inferred from sequence or structural similarity /// 0051015 // actin filament binding // inferred from sequence or structural similarity |
|-----------|--------|------|--------------|----------|--------------------|---------|---------------------------------------------------------------------------------------------------------------------------------------------------------------------------------------------------------------------------------------------------------------------------------------------------------------------------------------------------------------|--------|-------|------|-------|-------------------------------|----------------------------------------------------------------------------------------------------------------------------------------------------------------------------------------------------------------------------------------------------------------------------------------------------------------------------------------------------------------------------------------------------------------------------------------------------------------------------------------------------------------------------------------------------|-------------------------------------------------------------------------------------------------------------------------------------------------------------------------------------------------------------------------------------------------------------------------------------------------------------------------------------------------------------------------------------------|-----------------------------------------------------------------------------------------------------------------------------------------------------------------------------------------------------------------------------------------------|

|           |           |       |              |          |                   |         |                                                                                                                                                                                                                                |           |                                    |       |       |                                                                                                                                                                         |  |  |                                                                   |
|-----------|-----------|-------|--------------|----------|-------------------|---------|--------------------------------------------------------------------------------------------------------------------------------------------------------------------------------------------------------------------------------|-----------|------------------------------------|-------|-------|-------------------------------------------------------------------------------------------------------------------------------------------------------------------------|--|--|-------------------------------------------------------------------|
| 219481_at | NM_024525 | TTC13 | Homo sapiens | 6-Oct-14 | Exemplar sequence | GenBank | gb:NM_024525.1 /DEF=Homo sapiens hypothetical protein FLJ22584 (FLJ22584), mRNA. /FEA=mRNA /GEN=FLJ22584 /PROD=hypothetical protein FLJ22584 /DB_XREF=gi:13375669 /UG=Hs.4947 hypothetical protein FLJ22584 /FL=gb:NM_024525.1 | NM_024525 | tetratricopeptide repeat domain 13 | TTC13 | 79573 | NM_001122835<br>/// NM_024525<br>///<br>XM_005273260<br>///<br>XM_005273261<br>///<br>XM_005273262<br>///<br>XM_005273264<br>///<br>XM_006711814<br>///<br>XM_006711815 |  |  | 0005515 // protein binding // inferred from electronic annotation |
|-----------|-----------|-------|--------------|----------|-------------------|---------|--------------------------------------------------------------------------------------------------------------------------------------------------------------------------------------------------------------------------------|-----------|------------------------------------|-------|-------|-------------------------------------------------------------------------------------------------------------------------------------------------------------------------|--|--|-------------------------------------------------------------------|

|           |           |          |              |          |                   |         |                                                                                                                                                                                                                                                                                                                    |           |                             |          |       |           |  |                                                                                                                                                                                                                              |  |
|-----------|-----------|----------|--------------|----------|-------------------|---------|--------------------------------------------------------------------------------------------------------------------------------------------------------------------------------------------------------------------------------------------------------------------------------------------------------------------|-----------|-----------------------------|----------|-------|-----------|--|------------------------------------------------------------------------------------------------------------------------------------------------------------------------------------------------------------------------------|--|
| 219630_at | NM_005764 | PDZK1IP1 | Homo sapiens | 6-Oct-14 | Exemplar sequence | GenBank | gb:NM_005764.1 /DEF=Homo sapiens epithelial protein up-regulated in carcinoma, membrane associated protein 17 (DD96), mRNA. /FEA=mRNA /GEN=DD96 /PROD=epithelial protein up-regulated in carcinoma, membrane associated protein 17 /DB_XREF=gi:5031656 /UG=Hs.271473 epithelial protein up-regulated in carcinoma, | NM_005764 | PDZK1 interacting protein 1 | PDZK1IP1 | 10158 | NM_005764 |  | 0016020 // membrane // inferred from electronic annotation /// 0016021 // integral component of membrane // inferred from electronic annotation /// 0070062 // extracellular vesicular exosome // inferred from direct assay |  |
|-----------|-----------|----------|--------------|----------|-------------------|---------|--------------------------------------------------------------------------------------------------------------------------------------------------------------------------------------------------------------------------------------------------------------------------------------------------------------------|-----------|-----------------------------|----------|-------|-----------|--|------------------------------------------------------------------------------------------------------------------------------------------------------------------------------------------------------------------------------|--|

|           |           |      |              |          |                   |         |                                                                                                                                                                                                                                |           |                                                    |      |       |                                                                                                                                                                                                                                                                                                                                          |                                                                                     |  |                                                                                                                                           |
|-----------|-----------|------|--------------|----------|-------------------|---------|--------------------------------------------------------------------------------------------------------------------------------------------------------------------------------------------------------------------------------|-----------|----------------------------------------------------|------|-------|------------------------------------------------------------------------------------------------------------------------------------------------------------------------------------------------------------------------------------------------------------------------------------------------------------------------------------------|-------------------------------------------------------------------------------------|--|-------------------------------------------------------------------------------------------------------------------------------------------|
| 219646_at | NM_017702 | DEF8 | Homo sapiens | 6-Oct-14 | Exemplar sequence | GenBank | gb:NM_017702.1 /DEF=Homo sapiens hypothetical protein FLJ20186 (FLJ20186), mRNA. /FEA=mRNA /GEN=FLJ20186 /PROD=hypothetical protein FLJ20186 /DB_XREF=gi:8923176 /UG=Hs.65021 hypothetical protein FLJ20186 /FL=gb:NM_017702.1 | NM_017702 | differentially expressed in FDCP 8 homolog (mouse) | DEF8 | 54849 | NM_001242816<br>///<br>NM_001242817<br>///<br>NM_001242818<br>///<br>NM_001242819<br>///<br>NM_001242820<br>///<br>NM_001242821<br>///<br>NM_001242822<br>///<br>NM_017702<br>///<br>NM_207514<br>///<br>XM_005256316<br>///<br>XM_005256318<br>///<br>XM_006721207<br>///<br>XM_006721208<br>///<br>XM_006721209<br>///<br>XM_006721210 | 0035556 // intracellular signal transduction // inferred from electronic annotation |  | 0008270 // zinc ion binding // inferred from electronic annotation // 0046872 // metal ion binding // inferred from electronic annotation |
|-----------|-----------|------|--------------|----------|-------------------|---------|--------------------------------------------------------------------------------------------------------------------------------------------------------------------------------------------------------------------------------|-----------|----------------------------------------------------|------|-------|------------------------------------------------------------------------------------------------------------------------------------------------------------------------------------------------------------------------------------------------------------------------------------------------------------------------------------------|-------------------------------------------------------------------------------------|--|-------------------------------------------------------------------------------------------------------------------------------------------|



|           |           |      |              |          |                   |         |                                                                                                                                                                                                                                                                                                                     |           |                                  |      |       |                                                                                                |                                                                                                                                                                                                                                                                                                                                                                                                                                                                                                                                                                                                          |                                                                                                                          |                                                                                                                                                                                                                                                                                                                                                                                                                             |
|-----------|-----------|------|--------------|----------|-------------------|---------|---------------------------------------------------------------------------------------------------------------------------------------------------------------------------------------------------------------------------------------------------------------------------------------------------------------------|-----------|----------------------------------|------|-------|------------------------------------------------------------------------------------------------|----------------------------------------------------------------------------------------------------------------------------------------------------------------------------------------------------------------------------------------------------------------------------------------------------------------------------------------------------------------------------------------------------------------------------------------------------------------------------------------------------------------------------------------------------------------------------------------------------------|--------------------------------------------------------------------------------------------------------------------------|-----------------------------------------------------------------------------------------------------------------------------------------------------------------------------------------------------------------------------------------------------------------------------------------------------------------------------------------------------------------------------------------------------------------------------|
| 219708_at | NM_020201 | NT5M | Homo sapiens | 6-Oct-14 | Exemplar sequence | GenBank | gb:NM_020201.1 /DEF=Homo sapiens 5(3)-deoxyribonucleotidase (dNT-2); nuclear gene for mitochondrial product (LOC56953), mRNA. /FEA=mRNA /GEN=LOC56953 /PROD=5(3)-deoxyribonucleotidase (dNT-2); nuclear gene for mitochondrial product /DB_XREF=gi:9910371 /UG=Hs.16614 5(3)-deoxyribonucleotidase (dNT-2); nuclear | NM_020201 | 5',3'-nucleotidase, mitochondria | NT5M | 56953 | NM_020201 /// XM_005256731 /// XM_005256732 /// XM_005256733 /// XM_005256734 /// XM_005256737 | 0006206 // pyrimidine nucleobase metabolic process // traceable author statement /// 0006260 // DNA replication // traceable author statement /// 0009117 // nucleotide metabolic process // inferred from electronic annotation /// 0009223 // pyrimidine deoxyribonucleotide catabolic process // traceable author statement /// 0016311 // dephosphorylation // not recorded /// 0016311 // dephosphorylation // inferred from electronic annotation /// 0016311 // dephosphorylation // traceable author statement /// 0044281 // small molecule metabolic process // traceable author statement /// | 0005739 // mitochondrion // traceable author statement /// 0005759 // mitochondrial matrix // traceable author statement | 0000166 // nucleotide binding // inferred from electronic annotation /// 0008252 // nucleotidase activity // traceable author statement /// 0008253 // 5'-nucleotidase activity // not recorded /// 0016787 // hydrolase activity // inferred from electronic annotation /// 0016791 // phosphatase activity // inferred from electronic annotation /// 0046872 // metal ion binding // inferred from electronic annotation |
|-----------|-----------|------|--------------|----------|-------------------|---------|---------------------------------------------------------------------------------------------------------------------------------------------------------------------------------------------------------------------------------------------------------------------------------------------------------------------|-----------|----------------------------------|------|-------|------------------------------------------------------------------------------------------------|----------------------------------------------------------------------------------------------------------------------------------------------------------------------------------------------------------------------------------------------------------------------------------------------------------------------------------------------------------------------------------------------------------------------------------------------------------------------------------------------------------------------------------------------------------------------------------------------------------|--------------------------------------------------------------------------------------------------------------------------|-----------------------------------------------------------------------------------------------------------------------------------------------------------------------------------------------------------------------------------------------------------------------------------------------------------------------------------------------------------------------------------------------------------------------------|

|           |           |       |              |          |                   |         |                                                                                                                                                                                                                                     |           |                                                              |       |       |           |                                                                                                                                                                                                                                                                                                                                                                                                                                                                                                                                                                                                                                   |                                                                                                                                                                                                                        |                                                                                                                                                                                                                                                                                                                                                  |
|-----------|-----------|-------|--------------|----------|-------------------|---------|-------------------------------------------------------------------------------------------------------------------------------------------------------------------------------------------------------------------------------------|-----------|--------------------------------------------------------------|-------|-------|-----------|-----------------------------------------------------------------------------------------------------------------------------------------------------------------------------------------------------------------------------------------------------------------------------------------------------------------------------------------------------------------------------------------------------------------------------------------------------------------------------------------------------------------------------------------------------------------------------------------------------------------------------------|------------------------------------------------------------------------------------------------------------------------------------------------------------------------------------------------------------------------|--------------------------------------------------------------------------------------------------------------------------------------------------------------------------------------------------------------------------------------------------------------------------------------------------------------------------------------------------|
| 219863_at | NM_016323 | HERC5 | Homo sapiens | 6-Oct-14 | Exemplar sequence | GenBank | gb:NM_016323.1 /DEF=Homo sapiens cyclin-E binding protein 1 (LOC51191), mRNA. /FEA=mRNA /GEN=LOC51191 /PROD=cyclin-E binding protein 1 /DB_XREF=gi:7705930 /UG=Hs.26663 cyclin-E binding protein 1 /FL=gb:AB027289.1 gb:NM_016323.1 | NM_016323 | HECT and RLD domain containing E3 ubiquitin protein ligase 5 | HERC5 | 51191 | NM_016323 | 0000079 // regulation of cyclin-dependent protein serine/threonine kinase activity // traceable author statement /// 0002376 // immune system process // inferred from electronic annotation /// 0008152 // metabolic process // inferred from electronic annotation /// 0016567 // protein ubiquitination // inferred from electronic annotation /// 0019221 // cytokine-mediated signaling pathway // traceable author statement /// 0032020 // ISG15-protein conjugation // inferred from direct assay /// 0032480 // negative regulation of type I interferon production // traceable author statement /// 0042787 // protein | 0005634 // nucleus // not recorded /// 0005737 // cytoplasm // not recorded /// 0005829 // cytosol // traceable author statement /// 0048471 // perinuclear region of cytoplasm // inferred from electronic annotation | 0004842 // ubiquitin-protein transferase activity // not recorded /// 0005515 // protein binding // inferred from physical interaction /// 0016874 // ligase activity // inferred from electronic annotation /// 0042296 // ISG15 ligase activity // inferred from direct assay /// 0044822 // poly(A) RNA binding // inferred from direct assay |
|-----------|-----------|-------|--------------|----------|-------------------|---------|-------------------------------------------------------------------------------------------------------------------------------------------------------------------------------------------------------------------------------------|-----------|--------------------------------------------------------------|-------|-------|-----------|-----------------------------------------------------------------------------------------------------------------------------------------------------------------------------------------------------------------------------------------------------------------------------------------------------------------------------------------------------------------------------------------------------------------------------------------------------------------------------------------------------------------------------------------------------------------------------------------------------------------------------------|------------------------------------------------------------------------------------------------------------------------------------------------------------------------------------------------------------------------|--------------------------------------------------------------------------------------------------------------------------------------------------------------------------------------------------------------------------------------------------------------------------------------------------------------------------------------------------|

|             |           |        |              |          |                   |         |                                                                                                                                                                                                                         |           |                         |        |      |                            |                                                                                                                                                                                                                                                                                  |                                                                                                                                                                                                                                                                   |                                                                                                                                                                                                                                                                                                                                                                                  |
|-------------|-----------|--------|--------------|----------|-------------------|---------|-------------------------------------------------------------------------------------------------------------------------------------------------------------------------------------------------------------------------|-----------|-------------------------|--------|------|----------------------------|----------------------------------------------------------------------------------------------------------------------------------------------------------------------------------------------------------------------------------------------------------------------------------|-------------------------------------------------------------------------------------------------------------------------------------------------------------------------------------------------------------------------------------------------------------------|----------------------------------------------------------------------------------------------------------------------------------------------------------------------------------------------------------------------------------------------------------------------------------------------------------------------------------------------------------------------------------|
| 220019_s_at | NM_005774 | ZNF224 | Homo sapiens | 6-Oct-14 | Exemplar sequence | GenBank | gb:NM_005774.1 /DEF=Homo sapiens zinc finger protein 255 (ZNF255), mRNA. /FEA=mRNA /GEN=ZNF255 /PROD=zinc finger protein 255 /DB_XREF=gi:5031614 /UG=Hs.181696 zinc finger protein 255 /FL=gb:AF067164.1 gb:NM_005774.1 | NM_005774 | zinc finger protein 224 | ZNF224 | 7767 | NM_013398 /// XM_005259221 | 0006351 // transcription, DNA-templated // inferred from electronic annotation /// 0006355 // regulation of transcription, DNA-templated // inferred from electronic annotation /// 0045892 // negative regulation of transcription, DNA-templated // inferred from direct assay | 0005622 // intracellular // inferred from electronic annotation /// 0005634 // nucleus // inferred from direct assay /// 0017053 // transcriptional repressor complex // inferred from direct assay /// 0031965 // nuclear membrane // inferred from direct assay | 0003676 // nucleic acid binding // inferred from electronic annotation /// 0003677 // DNA binding // inferred from electronic annotation /// 0003700 // sequence-specific DNA binding transcription factor activity // not recorded /// 0005515 // protein binding // inferred from physical interaction /// 0046872 // metal ion binding // inferred from electronic annotation |
|-------------|-----------|--------|--------------|----------|-------------------|---------|-------------------------------------------------------------------------------------------------------------------------------------------------------------------------------------------------------------------------|-----------|-------------------------|--------|------|----------------------------|----------------------------------------------------------------------------------------------------------------------------------------------------------------------------------------------------------------------------------------------------------------------------------|-------------------------------------------------------------------------------------------------------------------------------------------------------------------------------------------------------------------------------------------------------------------|----------------------------------------------------------------------------------------------------------------------------------------------------------------------------------------------------------------------------------------------------------------------------------------------------------------------------------------------------------------------------------|

|           |           |       |              |          |                   |         |                                                                                                                                                                                                                                                                                      |           |                                    |       |     |                            |                                                                                                                                                                                                                                                                                                                                                                                                                                                                                                                                                                                                                             |                                                                                                                                                                                                                                                                                                                                                                                   |                                                                                                                                                                                                                                                                                                                                                                                                                                                                                                                                                                                                                       |
|-----------|-----------|-------|--------------|----------|-------------------|---------|--------------------------------------------------------------------------------------------------------------------------------------------------------------------------------------------------------------------------------------------------------------------------------------|-----------|------------------------------------|-------|-----|----------------------------|-----------------------------------------------------------------------------------------------------------------------------------------------------------------------------------------------------------------------------------------------------------------------------------------------------------------------------------------------------------------------------------------------------------------------------------------------------------------------------------------------------------------------------------------------------------------------------------------------------------------------------|-----------------------------------------------------------------------------------------------------------------------------------------------------------------------------------------------------------------------------------------------------------------------------------------------------------------------------------------------------------------------------------|-----------------------------------------------------------------------------------------------------------------------------------------------------------------------------------------------------------------------------------------------------------------------------------------------------------------------------------------------------------------------------------------------------------------------------------------------------------------------------------------------------------------------------------------------------------------------------------------------------------------------|
| 220088_at | NM_001736 | C5AR1 | Homo sapiens | 6-Oct-14 | Exemplar sequence | GenBank | gb:NM_001736.1 /DEF=Homo sapiens complement component 5 receptor 1 (C5a ligand) (C5R1), mRNA. /FEA=mRNA /GEN=C5R1 /PROD=complement component 5 receptor 1 (C5a ligand) /DB_XREF=gi:4502508 /UG=Hs.2161 complement component 5 receptor 1 (C5a ligand) /FL=gb:M62505.1 gb:NM_001736.1 | NM_001736 | complement component 5a receptor 1 | C5AR1 | 728 | NM_001736 /// XM_005259190 | 0000187 // activation of MAPK activity // traceable author statement /// 0002430 // complement receptor mediated signaling pathway // inferred from electronic annotation /// 0006915 // apoptotic process // inferred from electronic annotation /// 0006935 // chemotaxis // traceable author statement /// 0006954 // inflammatory response // inferred from electronic annotation /// 0006955 // immune response // traceable author statement /// 0006968 // cellular defense response // traceable author statement /// 0007165 // signal transduction // traceable author statement /// 0007186 // G-protein coupled | 0005886 // plasma membrane // traceable author statement /// 0005887 // integral component of plasma membrane // traceable author statement /// 0009986 // cell surface // inferred from electronic annotation /// 0016020 // membrane // inferred from electronic annotation /// 0016021 // integral component of membrane // inferred from electronic annotation /// 0016323 // | 0001856 // complement component C5a binding // inferred from electronic annotation /// 0004871 // signal transducer activity // inferred from electronic annotation /// 0004878 // complement component C5a receptor activity // inferred from direct assay /// 0004930 // G-protein coupled receptor activity // inferred from electronic annotation /// 0004942 // anaphylatoxin receptor activity // inferred from electronic annotation /// 0004944 // C5a anaphylatoxin receptor activity // inferred from direct assay /// 0004982 // N-formyl peptide receptor activity // inferred from electronic annotation |
|-----------|-----------|-------|--------------|----------|-------------------|---------|--------------------------------------------------------------------------------------------------------------------------------------------------------------------------------------------------------------------------------------------------------------------------------------|-----------|------------------------------------|-------|-----|----------------------------|-----------------------------------------------------------------------------------------------------------------------------------------------------------------------------------------------------------------------------------------------------------------------------------------------------------------------------------------------------------------------------------------------------------------------------------------------------------------------------------------------------------------------------------------------------------------------------------------------------------------------------|-----------------------------------------------------------------------------------------------------------------------------------------------------------------------------------------------------------------------------------------------------------------------------------------------------------------------------------------------------------------------------------|-----------------------------------------------------------------------------------------------------------------------------------------------------------------------------------------------------------------------------------------------------------------------------------------------------------------------------------------------------------------------------------------------------------------------------------------------------------------------------------------------------------------------------------------------------------------------------------------------------------------------|

|           |           |      |              |          |                   |         |                                                                                                                                                                                                                                  |           |                                                       |      |       |                                                                                                                                                    |                                                                                                                                                                                                                                                                                                                                                                                                                                                                                                                                                                        |                                                                                                                                                                                          |                                                                                                                                                                 |
|-----------|-----------|------|--------------|----------|-------------------|---------|----------------------------------------------------------------------------------------------------------------------------------------------------------------------------------------------------------------------------------|-----------|-------------------------------------------------------|------|-------|----------------------------------------------------------------------------------------------------------------------------------------------------|------------------------------------------------------------------------------------------------------------------------------------------------------------------------------------------------------------------------------------------------------------------------------------------------------------------------------------------------------------------------------------------------------------------------------------------------------------------------------------------------------------------------------------------------------------------------|------------------------------------------------------------------------------------------------------------------------------------------------------------------------------------------|-----------------------------------------------------------------------------------------------------------------------------------------------------------------|
| 220236_at | NM_017990 | PDPR | Homo sapiens | 6-Oct-14 | Exemplar sequence | GenBank | gb:NM_017990.2 /DEF=Homo sapiens hypothetical protein FLJ10079 (FLJ10079), mRNA. /FEA=mRNA /GEN=FLJ10079 /PROD=hypothetical protein FLJ10079 /DB_XREF=gi:13775157 /UG=Hs.261215 hypothetical protein FLJ10079 /FL=gb:NM_017990.2 | NM_017990 | pyruvate dehydrogenase phosphatase regulatory subunit | PDPR | 55066 | NM_017990 ///<br>XM_005256015 ///<br>XM_005256016 ///<br>XM_005256019 ///<br>XM_006721224 ///<br>XM_006721225 ///<br>XM_006721226 ///<br>XR_429721 | 0006090 // pyruvate metabolic process // traceable author statement /// 0006546 // glycine catabolic process // inferred from electronic annotation /// 0010510 // regulation of acetyl-CoA biosynthetic process from pyruvate // traceable author statement /// 0032259 // methylation // inferred from electronic annotation /// 0044237 // cellular metabolic process // traceable author statement /// 0044281 // small molecule metabolic process // traceable author statement /// 0055114 // oxidation-reduction process // inferred from electronic annotation | 0005737 // cytoplasm // inferred from direct assay /// 0005739 // mitochondrion // inferred from electronic annotation /// 0005759 // mitochondrial matrix // traceable author statement | 0004047 // aminomethyltransferase activity // inferred from electronic annotation /// 0016491 // oxidoreductase activity // inferred from electronic annotation |
|-----------|-----------|------|--------------|----------|-------------------|---------|----------------------------------------------------------------------------------------------------------------------------------------------------------------------------------------------------------------------------------|-----------|-------------------------------------------------------|------|-------|----------------------------------------------------------------------------------------------------------------------------------------------------|------------------------------------------------------------------------------------------------------------------------------------------------------------------------------------------------------------------------------------------------------------------------------------------------------------------------------------------------------------------------------------------------------------------------------------------------------------------------------------------------------------------------------------------------------------------------|------------------------------------------------------------------------------------------------------------------------------------------------------------------------------------------|-----------------------------------------------------------------------------------------------------------------------------------------------------------------|

|           |           |       |              |          |                   |         |                                                                                                                                                                                                                                         |           |                               |       |       |           |                                                                                                                                                                                                                                                                                                                                                                                                                               |                                                                                                                                                                                                                       |                                                                                                                                                                        |
|-----------|-----------|-------|--------------|----------|-------------------|---------|-----------------------------------------------------------------------------------------------------------------------------------------------------------------------------------------------------------------------------------------|-----------|-------------------------------|-------|-------|-----------|-------------------------------------------------------------------------------------------------------------------------------------------------------------------------------------------------------------------------------------------------------------------------------------------------------------------------------------------------------------------------------------------------------------------------------|-----------------------------------------------------------------------------------------------------------------------------------------------------------------------------------------------------------------------|------------------------------------------------------------------------------------------------------------------------------------------------------------------------|
| 220313_at | NM_022049 | GPR88 | Homo sapiens | 6-Oct-14 | Exemplar sequence | GenBank | gb:NM_022049.1 /DEF=Homo sapiens G-protein coupled receptor 88 (GPR88), mRNA. /FEA=mRNA /GEN=GPR88 /PROD=G-protein coupled receptor 88 /DB_XREF=gi:1545752 /UG=Hs.170053 G-protein coupled receptor 88 /FL=gb:AB042410.1 gb:NM_022049.1 | NM_022049 | G protein-coupled receptor 88 | GPR88 | 54112 | NM_022049 | 0007165 // signal transduction // inferred from electronic annotation /// 0007186 // G-protein coupled receptor signaling pathway // non-traceable author statement /// 0007626 // locomotory behavior // inferred from electronic annotation /// 0019228 // neuronal action potential // inferred from electronic annotation /// 0050885 // neuromuscular process controlling balance // inferred from electronic annotation | 0005886 // plasma membrane // inferred from electronic annotation /// 0016020 // membrane // inferred from electronic annotation /// 0016021 // integral component of membrane // inferred from electronic annotation | 0004871 // signal transducer activity // inferred from electronic annotation /// 0004930 // G-protein coupled receptor activity // inferred from electronic annotation |
|-----------|-----------|-------|--------------|----------|-------------------|---------|-----------------------------------------------------------------------------------------------------------------------------------------------------------------------------------------------------------------------------------------|-----------|-------------------------------|-------|-------|-----------|-------------------------------------------------------------------------------------------------------------------------------------------------------------------------------------------------------------------------------------------------------------------------------------------------------------------------------------------------------------------------------------------------------------------------------|-----------------------------------------------------------------------------------------------------------------------------------------------------------------------------------------------------------------------|------------------------------------------------------------------------------------------------------------------------------------------------------------------------|

|           |           |      |              |          |                   |         |                                                                                                                                                                                                                                  |           |                   |      |       |                                                                                                                                   |                                                                                   |                                                                                                                                                                                                        |                                                                                                                                                                                                                                  |
|-----------|-----------|------|--------------|----------|-------------------|---------|----------------------------------------------------------------------------------------------------------------------------------------------------------------------------------------------------------------------------------|-----------|-------------------|------|-------|-----------------------------------------------------------------------------------------------------------------------------------|-----------------------------------------------------------------------------------|--------------------------------------------------------------------------------------------------------------------------------------------------------------------------------------------------------|----------------------------------------------------------------------------------------------------------------------------------------------------------------------------------------------------------------------------------|
| 220320_at | NM_024872 | DOK3 | Homo sapiens | 6-Oct-14 | Exemplar sequence | GenBank | gb:NM_024872.1 /DEF=Homo sapiens hypothetical protein FLJ22570 (FLJ22570), mRNA. /FEA=mRNA /GEN=FLJ22570 /PROD=hypothetical protein FLJ22570 /DB_XREF=gi:13376307 /UG=Hs.205450 hypothetical protein FLJ22570 /FL=gb:NM_024872.1 | NM_024872 | docking protein 3 | DOK3 | 79930 | NM_001144875 ///<br>NM_001144876 ///<br>NM_024872 ///<br>XM_005265984 ///<br>XM_005265985 ///<br>XM_005265987 ///<br>XM_006714920 | 0007265 // Ras protein signal transduction // inferred from electronic annotation | 0005737 // cytoplasm // inferred from electronic annotation ///<br>0005886 // plasma membrane // inferred from electronic annotation ///<br>0016020 // membrane // inferred from electronic annotation | 0005158 // insulin receptor binding // inferred from electronic annotation ///<br>0005515 // protein binding // inferred from physical interaction ///<br>0005543 // phospholipid binding // inferred from electronic annotation |
|-----------|-----------|------|--------------|----------|-------------------|---------|----------------------------------------------------------------------------------------------------------------------------------------------------------------------------------------------------------------------------------|-----------|-------------------|------|-------|-----------------------------------------------------------------------------------------------------------------------------------|-----------------------------------------------------------------------------------|--------------------------------------------------------------------------------------------------------------------------------------------------------------------------------------------------------|----------------------------------------------------------------------------------------------------------------------------------------------------------------------------------------------------------------------------------|

|             |           |       |              |          |                   |         |                                                                                                                                                                                                                                |           |                                |       |       |                                                                                                                                                                                                                                 |                                                                                                                                                                                                                                                                                                                                                                                       |                                                                                                                                                                                                                                                                                                |                                                                                                                                                                                                                                                                                                                                                                          |
|-------------|-----------|-------|--------------|----------|-------------------|---------|--------------------------------------------------------------------------------------------------------------------------------------------------------------------------------------------------------------------------------|-----------|--------------------------------|-------|-------|---------------------------------------------------------------------------------------------------------------------------------------------------------------------------------------------------------------------------------|---------------------------------------------------------------------------------------------------------------------------------------------------------------------------------------------------------------------------------------------------------------------------------------------------------------------------------------------------------------------------------------|------------------------------------------------------------------------------------------------------------------------------------------------------------------------------------------------------------------------------------------------------------------------------------------------|--------------------------------------------------------------------------------------------------------------------------------------------------------------------------------------------------------------------------------------------------------------------------------------------------------------------------------------------------------------------------|
| 220363_s_at | NM_022086 | ELMO2 | Homo sapiens | 6-Oct-14 | Exemplar sequence | GenBank | gb:NM_022086.1 /DEF=Homo sapiens hypothetical protein FLJ11656 (FLJ11656), mRNA. /FEA=mRNA /GEN=FLJ11656 /PROD=hypothetical protein FLJ11656 /DB_XREF=gi:1545798 /UG=Hs.96560 hypothetical protein FLJ11656 /FL=gb:NM_022086.1 | NM_022086 | engulfment and cell motility 2 | ELMO2 | 63916 | NM_022086 ///<br>NM_133171 ///<br>NM_182764 ///<br>XM_005260496 ///<br>XM_005260497 ///<br>XM_005260498 ///<br>XM_005260499 ///<br>XM_005260500 ///<br>XM_005260501 ///<br>XM_005260502 ///<br>XM_006723854 ///<br>XM_006723855 | 0006909 // phagocytosis // inferred from electronic annotation /// 0006915 // apoptotic process // inferred from electronic annotation /// 0038096 // Fc-gamma receptor signaling pathway involved in phagocytosis // traceable author statement /// 0045087 // innate immune response // traceable author statement /// 0060326 // cell chemotaxis // inferred from mutant phenotype | 0005737 // cytoplasm // inferred from electronic annotation /// 0005829 // cytosol // inferred from direct assay /// 0005829 // cytosol // traceable author statement /// 0005856 // cytoskeleton // inferred from electronic annotation /// 0016020 // membrane // inferred from direct assay | 0005488 // binding // inferred from electronic annotation /// 0005515 // protein binding // inferred from physical interaction /// 0005543 // phospholipid binding // inferred from electronic annotation /// 0017124 // SH3 domain binding // inferred from electronic annotation /// 0030971 // receptor tyrosine kinase binding // inferred from physical interaction |
|-------------|-----------|-------|--------------|----------|-------------------|---------|--------------------------------------------------------------------------------------------------------------------------------------------------------------------------------------------------------------------------------|-----------|--------------------------------|-------|-------|---------------------------------------------------------------------------------------------------------------------------------------------------------------------------------------------------------------------------------|---------------------------------------------------------------------------------------------------------------------------------------------------------------------------------------------------------------------------------------------------------------------------------------------------------------------------------------------------------------------------------------|------------------------------------------------------------------------------------------------------------------------------------------------------------------------------------------------------------------------------------------------------------------------------------------------|--------------------------------------------------------------------------------------------------------------------------------------------------------------------------------------------------------------------------------------------------------------------------------------------------------------------------------------------------------------------------|



|           |           |        |              |          |                   |         |                                                                                                                                                                                                                                                         |           |                                             |        |       |                                                                               |                                                                                                                                                                                                                                                                                                     |                                                                                                        |                                                                                                                                                                                                                                                                                                                                                                     |
|-----------|-----------|--------|--------------|----------|-------------------|---------|---------------------------------------------------------------------------------------------------------------------------------------------------------------------------------------------------------------------------------------------------------|-----------|---------------------------------------------|--------|-------|-------------------------------------------------------------------------------|-----------------------------------------------------------------------------------------------------------------------------------------------------------------------------------------------------------------------------------------------------------------------------------------------------|--------------------------------------------------------------------------------------------------------|---------------------------------------------------------------------------------------------------------------------------------------------------------------------------------------------------------------------------------------------------------------------------------------------------------------------------------------------------------------------|
| 220395_at | NM_018602 | DNAJA4 | Homo sapiens | 6-Oct-14 | Exemplar sequence | GenBank | gb:NM_018602.1 /DEF=Homo sapiens hypothetical protein PRO1472 (PRO1472), mRNA. /FEA=mRNA /GEN=PRO1472 /PROD=hypothetical protein PRO1472 /DB_XREF=gi:8924043 /UG=Hs.154662 DnaJ (Hsp40) homolog, subfamily A, member 4 /FL=gb:AF116663.1 gb:NM_018602.1 | NM_018602 | DnaJ (Hsp40) homolog, subfamily A, member 4 | DNAJA4 | 55466 | NM_001130182 /// NM_001130183 /// NM_018602 /// XM_005254535 /// XM_006720601 | 0006457 // protein folding // inferred from electronic annotation /// 0009408 // response to heat // inferred from electronic annotation /// 0042026 // protein refolding // inferred from direct assay /// 0090084 // negative regulation of inclusion body assembly // inferred from direct assay | 0005829 // cytosol // inferred from direct assay /// 0016020 // membrane // inferred from direct assay | 0005524 // ATP binding // inferred from electronic annotation /// 0031072 // heat shock protein binding // inferred from electronic annotation /// 0046872 // metal ion binding // inferred from electronic annotation /// 0051082 // unfolded protein binding // inferred from direct assay /// 0051087 // chaperone binding // inferred from physical interaction |
|-----------|-----------|--------|--------------|----------|-------------------|---------|---------------------------------------------------------------------------------------------------------------------------------------------------------------------------------------------------------------------------------------------------------|-----------|---------------------------------------------|--------|-------|-------------------------------------------------------------------------------|-----------------------------------------------------------------------------------------------------------------------------------------------------------------------------------------------------------------------------------------------------------------------------------------------------|--------------------------------------------------------------------------------------------------------|---------------------------------------------------------------------------------------------------------------------------------------------------------------------------------------------------------------------------------------------------------------------------------------------------------------------------------------------------------------------|

|           |           |       |              |          |                   |         |                                                                                                                                                                                                                                  |           |                                                    |       |       |                                                                                                                                                                                                                                                                                                                                    |                                                                                                                                                                                                                                                                                                                                                                                                                                                                                                                                                                                                                                                          |                                                                                                                                                                                                                                                                                                                                                                                                           |                                                                                                                                                                                                                                                                                        |
|-----------|-----------|-------|--------------|----------|-------------------|---------|----------------------------------------------------------------------------------------------------------------------------------------------------------------------------------------------------------------------------------|-----------|----------------------------------------------------|-------|-------|------------------------------------------------------------------------------------------------------------------------------------------------------------------------------------------------------------------------------------------------------------------------------------------------------------------------------------|----------------------------------------------------------------------------------------------------------------------------------------------------------------------------------------------------------------------------------------------------------------------------------------------------------------------------------------------------------------------------------------------------------------------------------------------------------------------------------------------------------------------------------------------------------------------------------------------------------------------------------------------------------|-----------------------------------------------------------------------------------------------------------------------------------------------------------------------------------------------------------------------------------------------------------------------------------------------------------------------------------------------------------------------------------------------------------|----------------------------------------------------------------------------------------------------------------------------------------------------------------------------------------------------------------------------------------------------------------------------------------|
| 220464_at | NM_024979 | MCF2L | Homo sapiens | 6-Oct-14 | Exemplar sequence | GenBank | gb:NM_024979.1 /DEF=Homo sapiens hypothetical protein FLJ12122 (FLJ12122), mRNA. /FEA=mRNA /GEN=FLJ12122 /PROD=hypothetical protein FLJ12122 /DB_XREF=gi:13376481 /UG=Hs.287488 hypothetical protein FLJ12122 /FL=gb:NM_024979.1 | NM_024979 | MCF.2 cell line derived transforming sequence-like | MCF2L | 23263 | NM_001112732<br>/// NM_024979<br>///<br>XM_005268307<br>///<br>XM_005268308<br>///<br>XM_005268309<br>///<br>XM_005268310<br>///<br>XM_005268312<br>///<br>XM_005268313<br>///<br>XM_005268314<br>///<br>XM_005268315<br>///<br>XM_005268316<br>///<br>XM_006719966<br>///<br>XM_006719967<br>///<br>XM_006719968<br>/// XR_429282 | 0007264 // small GTPase mediated signal transduction // traceable author statement ///<br>0007266 // Rho protein signal transduction // inferred from electronic annotation /// 0032319 // regulation of Rho GTPase activity // inferred from electronic annotation ///<br>0032321 // positive regulation of Rho GTPase activity // inferred from electronic annotation ///<br>0035023 // regulation of Rho protein signal transduction // inferred from electronic annotation ///<br>0035556 // intracellular signal transduction // inferred from electronic annotation ///<br>0043065 // positive regulation of apoptotic process // traceable author | 0005615 // extracellular space // inferred from direct assay ///<br>0005737 // cytoplasm // inferred from electronic annotation ///<br>0005829 // cytosol // traceable author statement ///<br>0005886 // plasma membrane // inferred from electronic annotation ///<br>0016020 // membrane // inferred from electronic annotation ///<br>0030027 // lamellipodium // inferred from electronic annotation | 0005085 // guanyl-nucleotide exchange factor activity // inferred from electronic annotation /// 0005089 // Rho guanyl-nucleotide exchange factor activity // inferred from electronic annotation /// 0005545 // 1-phosphatidylinositol binding // inferred from electronic annotation |
|-----------|-----------|-------|--------------|----------|-------------------|---------|----------------------------------------------------------------------------------------------------------------------------------------------------------------------------------------------------------------------------------|-----------|----------------------------------------------------|-------|-------|------------------------------------------------------------------------------------------------------------------------------------------------------------------------------------------------------------------------------------------------------------------------------------------------------------------------------------|----------------------------------------------------------------------------------------------------------------------------------------------------------------------------------------------------------------------------------------------------------------------------------------------------------------------------------------------------------------------------------------------------------------------------------------------------------------------------------------------------------------------------------------------------------------------------------------------------------------------------------------------------------|-----------------------------------------------------------------------------------------------------------------------------------------------------------------------------------------------------------------------------------------------------------------------------------------------------------------------------------------------------------------------------------------------------------|----------------------------------------------------------------------------------------------------------------------------------------------------------------------------------------------------------------------------------------------------------------------------------------|

|           |           |       |              |          |                   |         |                                                                                                                                                                                                                    |           |                        |       |       |                                                                               |                                                                                                                                                                                                                                                                                                                                                                                                                                                                                                                                                                                                                                 |                                                  |                                                                                                                                                                                                                                                                                                                                                                                                                                                                                                                                                                                                                                                                                                                                           |
|-----------|-----------|-------|--------------|----------|-------------------|---------|--------------------------------------------------------------------------------------------------------------------------------------------------------------------------------------------------------------------|-----------|------------------------|-------|-------|-------------------------------------------------------------------------------|---------------------------------------------------------------------------------------------------------------------------------------------------------------------------------------------------------------------------------------------------------------------------------------------------------------------------------------------------------------------------------------------------------------------------------------------------------------------------------------------------------------------------------------------------------------------------------------------------------------------------------|--------------------------------------------------|-------------------------------------------------------------------------------------------------------------------------------------------------------------------------------------------------------------------------------------------------------------------------------------------------------------------------------------------------------------------------------------------------------------------------------------------------------------------------------------------------------------------------------------------------------------------------------------------------------------------------------------------------------------------------------------------------------------------------------------------|
| 220792_at | NM_018699 | PRDM5 | Homo sapiens | 6-Oct-14 | Exemplar sequence | GenBank | gb:NM_018699.1 /DEF=Homo sapiens PR domain containing 5 (PRDM5), mRNA. /FEA=mRNA /GEN=PRDM5 /PROD=PR domain containing 5 /DB_XREF=gi:8923963 /UG=Hs.192867 PR domain containing 5 /FL=gb:AF272897.1 gb:NM_018699.1 | NM_018699 | PR domain containing 5 | PRDM5 | 11107 | NM_018699 /// XM_005262706 /// XM_005262707 /// XM_005262708 /// XM_006714072 | 0000278 // mitotic cell cycle // inferred from mutant phenotype /// 0006351 // transcription, DNA-templated // inferred from electronic annotation /// 0006355 // regulation of transcription, DNA-templated // inferred from electronic annotation /// 0016568 // chromatin modification // inferred from electronic annotation /// 0016575 // histone deacetylation // inferred from mutant phenotype /// 0032259 // methylation // inferred from electronic annotation /// 0045892 // negative regulation of transcription, DNA-templated // inferred from direct assay /// 0051567 // histone H3-K9 methylation // inferred | 0005634 // nucleus // inferred from direct assay | 0000976 // transcription regulatory region sequence-specific DNA binding // inferred from electronic annotation /// 0003676 // nucleic acid binding // inferred from electronic annotation /// 0003677 // DNA binding // inferred from electronic annotation /// 0005515 // protein binding // inferred from physical interaction /// 0008168 // methyltransferase activity // inferred from electronic annotation /// 0016740 // transferase activity // inferred from electronic annotation /// 0043565 // sequence-specific DNA binding // inferred from direct assay /// 0044212 // transcription regulatory region DNA binding // inferred from direct assay /// 0046872 // metal ion binding // inferred from electronic annotation |
|-----------|-----------|-------|--------------|----------|-------------------|---------|--------------------------------------------------------------------------------------------------------------------------------------------------------------------------------------------------------------------|-----------|------------------------|-------|-------|-------------------------------------------------------------------------------|---------------------------------------------------------------------------------------------------------------------------------------------------------------------------------------------------------------------------------------------------------------------------------------------------------------------------------------------------------------------------------------------------------------------------------------------------------------------------------------------------------------------------------------------------------------------------------------------------------------------------------|--------------------------------------------------|-------------------------------------------------------------------------------------------------------------------------------------------------------------------------------------------------------------------------------------------------------------------------------------------------------------------------------------------------------------------------------------------------------------------------------------------------------------------------------------------------------------------------------------------------------------------------------------------------------------------------------------------------------------------------------------------------------------------------------------------|

|             |           |       |              |          |                   |         |                                                                                                                                                                                                                                      |           |                        |       |       |                                                     |  |                                                                 |  |
|-------------|-----------|-------|--------------|----------|-------------------|---------|--------------------------------------------------------------------------------------------------------------------------------------------------------------------------------------------------------------------------------------|-----------|------------------------|-------|-------|-----------------------------------------------------|--|-----------------------------------------------------------------|--|
| 221311_x_at | NM_020466 | LYRM2 | Homo sapiens | 6-Oct-14 | Exemplar sequence | GenBank | gb:NM_020466.1 /DEF=Homo sapiens hypothetical protein dJ12208.2 (DJ12208.2), mRNA. /FEA=CDS /GEN=DJ12208.2 /PROD=hypothetical protein dJ12208.2 /DB_XREF=gj:10092688 /UG=Hs.132094 hypothetical protein dJ12208.2 /FL=gb:NM_020466.1 | NM_020466 | LYR motif containing 2 | LYRM2 | 57226 | NM_020466 /// NR_028493 /// NR_028494 /// NR_028495 |  | 0005739 // mitochondrion // inferred from electronic annotation |  |
|-------------|-----------|-------|--------------|----------|-------------------|---------|--------------------------------------------------------------------------------------------------------------------------------------------------------------------------------------------------------------------------------------|-----------|------------------------|-------|-------|-----------------------------------------------------|--|-----------------------------------------------------------------|--|

|           |           |         |              |          |                   |         |                                                                                                                                                                                                                                       |           |                                   |         |       |           |                                                                                                                                                                                                                                                                                                                                                                                                                                                  |                                                                                                                                                                                              |                                                                                                                                                                                                                                                                                                                                                                                              |
|-----------|-----------|---------|--------------|----------|-------------------|---------|---------------------------------------------------------------------------------------------------------------------------------------------------------------------------------------------------------------------------------------|-----------|-----------------------------------|---------|-------|-----------|--------------------------------------------------------------------------------------------------------------------------------------------------------------------------------------------------------------------------------------------------------------------------------------------------------------------------------------------------------------------------------------------------------------------------------------------------|----------------------------------------------------------------------------------------------------------------------------------------------------------------------------------------------|----------------------------------------------------------------------------------------------------------------------------------------------------------------------------------------------------------------------------------------------------------------------------------------------------------------------------------------------------------------------------------------------|
| 221391_at | NM_023922 | TAS2R14 | Homo sapiens | 6-Oct-14 | Exemplar sequence | GenBank | gb:NM_023922.1 /DEF=Homo sapiens taste receptor, family B, member 1 (TRB1), mRNA. /FEA=CDS /GEN=TRB1 /PROD=taste receptor, family B, member 1 /DB_XREF=gi:12965181 /UG=Hs.272394 taste receptor, type 2, member 14 /FL=gb:NM_023922.1 | NM_023922 | taste receptor, type 2, member 14 | TAS2R14 | 50840 | NM_023922 | 0001580 // detection of chemical stimulus involved in sensory perception of bitter taste // inferred from direct assay /// 0007165 // signal transduction // inferred from electronic annotation /// 0007186 // G-protein coupled receptor signaling pathway // inferred by curator /// 0050896 // response to stimulus // inferred from electronic annotation /// 0050909 // sensory perception of taste // inferred from electronic annotation | 0005886 // plasma membrane // traceable author statement /// 0016020 // membrane // inferred from electronic annotation /// 0016021 // integral component of membrane // inferred by curator | 0004871 // signal transducer activity // inferred from electronic annotation /// 0004930 // G-protein coupled receptor activity // inferred from electronic annotation /// 0008527 // taste receptor activity // inferred from direct assay /// 0008527 // taste receptor activity // traceable author statement /// 0033038 // bitter taste receptor activity // inferred from direct assay |
|-----------|-----------|---------|--------------|----------|-------------------|---------|---------------------------------------------------------------------------------------------------------------------------------------------------------------------------------------------------------------------------------------|-----------|-----------------------------------|---------|-------|-----------|--------------------------------------------------------------------------------------------------------------------------------------------------------------------------------------------------------------------------------------------------------------------------------------------------------------------------------------------------------------------------------------------------------------------------------------------------|----------------------------------------------------------------------------------------------------------------------------------------------------------------------------------------------|----------------------------------------------------------------------------------------------------------------------------------------------------------------------------------------------------------------------------------------------------------------------------------------------------------------------------------------------------------------------------------------------|

|             |           |         |              |          |                   |         |                                                                                                                                                                                                                    |           |                       |         |       |           |                                                                                                                                                                                                                                                                                                                                                                       |                                                                                                                                                                                                                  |                                                                       |
|-------------|-----------|---------|--------------|----------|-------------------|---------|--------------------------------------------------------------------------------------------------------------------------------------------------------------------------------------------------------------------|-----------|-----------------------|---------|-------|-----------|-----------------------------------------------------------------------------------------------------------------------------------------------------------------------------------------------------------------------------------------------------------------------------------------------------------------------------------------------------------------------|------------------------------------------------------------------------------------------------------------------------------------------------------------------------------------------------------------------|-----------------------------------------------------------------------|
| 221450_x_at | NM_018933 | PCDHB13 | Homo sapiens | 6-Oct-14 | Exemplar sequence | GenBank | gb:NM_018933.1 /DEF=Homo sapiens protocadherin beta 13 (PCDHB13), mRNA. /FEA=CDS /GEN=PCDHB13 /PROD=protocadherin beta 13 /DB_XREF=gi:1036653 /UG=Hs.283803 protocadherin beta 13 /FL=gb:NM_018933.1 gb:AF152492.1 | NM_018933 | protocadherin beta 13 | PCDHB13 | 56123 | NM_018933 | 0007155 // cell adhesion // inferred from electronic annotation /// 0007156 // homophilic cell adhesion // inferred from electronic annotation /// 0007268 // synaptic transmission // traceable author statement /// 0007416 // synapse assembly // traceable author statement /// 0016339 // calcium-dependent cell-cell adhesion // non-traceable author statement | 0005886 // plasma membrane // inferred from electronic annotation /// 0016020 // membrane // inferred from electronic annotation /// 0016021 // integral component of membrane // non-traceable author statement | 0005509 // calcium ion binding // inferred from electronic annotation |
|-------------|-----------|---------|--------------|----------|-------------------|---------|--------------------------------------------------------------------------------------------------------------------------------------------------------------------------------------------------------------------|-----------|-----------------------|---------|-------|-----------|-----------------------------------------------------------------------------------------------------------------------------------------------------------------------------------------------------------------------------------------------------------------------------------------------------------------------------------------------------------------------|------------------------------------------------------------------------------------------------------------------------------------------------------------------------------------------------------------------|-----------------------------------------------------------------------|

|           |          |        |              |          |                    |         |                                                                                                                                                                                                                                                                                                |          |                                                      |        |     |                            |                                                                                                                                                                                                                                                                                                                                                                                                                                                                                                                                                                                                                                            |                                                                                                                                                                                                                                                                                                                                                                                                     |                                                                                                                                                                                                                                                                                                                                                                                                                                               |
|-----------|----------|--------|--------------|----------|--------------------|---------|------------------------------------------------------------------------------------------------------------------------------------------------------------------------------------------------------------------------------------------------------------------------------------------------|----------|------------------------------------------------------|--------|-----|----------------------------|--------------------------------------------------------------------------------------------------------------------------------------------------------------------------------------------------------------------------------------------------------------------------------------------------------------------------------------------------------------------------------------------------------------------------------------------------------------------------------------------------------------------------------------------------------------------------------------------------------------------------------------------|-----------------------------------------------------------------------------------------------------------------------------------------------------------------------------------------------------------------------------------------------------------------------------------------------------------------------------------------------------------------------------------------------------|-----------------------------------------------------------------------------------------------------------------------------------------------------------------------------------------------------------------------------------------------------------------------------------------------------------------------------------------------------------------------------------------------------------------------------------------------|
| 221478_at | AL132665 | BNIP3L | Homo sapiens | 6-Oct-14 | Consensus sequence | GenBank | Consensus includes gb:AL132665.1 /DEF=Homo sapiens mRNA; cDNA DKFZp566E034 (from clone DKFZp566E034) ; complete cds. /FEA=mRNA /DB_XREF=gi:6137021 /UG=Hs.132955 BCL2adenovirus E1B 19kD-interacting protein 3-like /FL=gb:AF060922.1 gb:AB004788.1 gb:AF067396.1 gb:NM_004331.1 gb:AL132665.1 | AL132665 | BCL2/adenovirus E1B 19kDa interacting protein 3-like | BNIP3L | 665 | NM_004331 /// XM_005273617 | 0006915 // apoptotic process // inferred from electronic annotation /// 0016032 // viral process // inferred from electronic annotation /// 0019048 // modulation by virus of host morphology or physiology // inferred from electronic annotation /// 0035694 // mitochondrial protein catabolic process // inferred from mutant phenotype /// 0043065 // positive regulation of apoptotic process // inferred from direct assay /// 0043066 // negative regulation of apoptotic process // inferred from direct assay /// 0051607 // defense response to virus // inferred from direct assay /// 0097345 // mitochondrial outer membrane | 0005634 // nucleus // inferred from electronic annotation /// 0005635 // nuclear envelope // inferred from direct assay /// 0005739 // mitochondrion // inferred from direct assay /// 0005740 // mitochondrial envelope // inferred from electronic annotation /// 0005741 // mitochondrial outer membrane // inferred from mutant phenotype /// 0005783 // endoplasmic reticulum // inferred from | 0005515 // protein binding // inferred from physical interaction /// 0005521 // lamin binding // inferred from direct assay /// 0005521 // lamin binding // inferred from physical interaction /// 0042802 // identical protein binding // inferred from physical interaction /// 0042803 // protein homodimerization activity // inferred from direct assay /// 0046982 // protein heterodimerization activity // inferred from direct assay |
|-----------|----------|--------|--------------|----------|--------------------|---------|------------------------------------------------------------------------------------------------------------------------------------------------------------------------------------------------------------------------------------------------------------------------------------------------|----------|------------------------------------------------------|--------|-----|----------------------------|--------------------------------------------------------------------------------------------------------------------------------------------------------------------------------------------------------------------------------------------------------------------------------------------------------------------------------------------------------------------------------------------------------------------------------------------------------------------------------------------------------------------------------------------------------------------------------------------------------------------------------------------|-----------------------------------------------------------------------------------------------------------------------------------------------------------------------------------------------------------------------------------------------------------------------------------------------------------------------------------------------------------------------------------------------------|-----------------------------------------------------------------------------------------------------------------------------------------------------------------------------------------------------------------------------------------------------------------------------------------------------------------------------------------------------------------------------------------------------------------------------------------------|

|             |          |        |              |          |                   |         |                                                                                                                                                                                                                                                                                |          |                                                      |        |     |                            |                                                                                                                                                                                                                                                                                                                                                                                                                                                                                                                                                                                                                                            |                                                                                                                                                                                                                                                                                                                                                                                                     |                                                                                                                                                                                                                                                                                                                                                                                                                                               |
|-------------|----------|--------|--------------|----------|-------------------|---------|--------------------------------------------------------------------------------------------------------------------------------------------------------------------------------------------------------------------------------------------------------------------------------|----------|------------------------------------------------------|--------|-----|----------------------------|--------------------------------------------------------------------------------------------------------------------------------------------------------------------------------------------------------------------------------------------------------------------------------------------------------------------------------------------------------------------------------------------------------------------------------------------------------------------------------------------------------------------------------------------------------------------------------------------------------------------------------------------|-----------------------------------------------------------------------------------------------------------------------------------------------------------------------------------------------------------------------------------------------------------------------------------------------------------------------------------------------------------------------------------------------------|-----------------------------------------------------------------------------------------------------------------------------------------------------------------------------------------------------------------------------------------------------------------------------------------------------------------------------------------------------------------------------------------------------------------------------------------------|
| 221479_s_at | AF060922 | BNIP3L | Homo sapiens | 6-Oct-14 | Exemplar sequence | GenBank | gb:AF060922.1 /DEF=Homo sapiens clone 016a05 My020 protein mRNA, complete cds. /FEA=mRNA /PROD=My020 protein /DB_XREF=gi:1 2001981 /UG=Hs.132955 BCL2adenovirus E1B 19kD-interacting protein 3-like /FL=gb:AF060922.1 gb:AB004788.1 gb:AF067396.1 gb:NM_004331.1 gb:AL132665.1 | AF060922 | BCL2/adenovirus E1B 19kDa interacting protein 3-like | BNIP3L | 665 | NM_004331 /// XM_005273617 | 0006915 // apoptotic process // inferred from electronic annotation /// 0016032 // viral process // inferred from electronic annotation /// 0019048 // modulation by virus of host morphology or physiology // inferred from electronic annotation /// 0035694 // mitochondrial protein catabolic process // inferred from mutant phenotype /// 0043065 // positive regulation of apoptotic process // inferred from direct assay /// 0043066 // negative regulation of apoptotic process // inferred from direct assay /// 0051607 // defense response to virus // inferred from direct assay /// 0097345 // mitochondrial outer membrane | 0005634 // nucleus // inferred from electronic annotation /// 0005635 // nuclear envelope // inferred from direct assay /// 0005739 // mitochondrion // inferred from direct assay /// 0005740 // mitochondrial envelope // inferred from electronic annotation /// 0005741 // mitochondrial outer membrane // inferred from mutant phenotype /// 0005783 // endoplasmic reticulum // inferred from | 0005515 // protein binding // inferred from physical interaction /// 0005521 // lamin binding // inferred from direct assay /// 0005521 // lamin binding // inferred from physical interaction /// 0042802 // identical protein binding // inferred from physical interaction /// 0042803 // protein homodimerization activity // inferred from direct assay /// 0046982 // protein heterodimerization activity // inferred from direct assay |
|-------------|----------|--------|--------------|----------|-------------------|---------|--------------------------------------------------------------------------------------------------------------------------------------------------------------------------------------------------------------------------------------------------------------------------------|----------|------------------------------------------------------|--------|-----|----------------------------|--------------------------------------------------------------------------------------------------------------------------------------------------------------------------------------------------------------------------------------------------------------------------------------------------------------------------------------------------------------------------------------------------------------------------------------------------------------------------------------------------------------------------------------------------------------------------------------------------------------------------------------------|-----------------------------------------------------------------------------------------------------------------------------------------------------------------------------------------------------------------------------------------------------------------------------------------------------------------------------------------------------------------------------------------------------|-----------------------------------------------------------------------------------------------------------------------------------------------------------------------------------------------------------------------------------------------------------------------------------------------------------------------------------------------------------------------------------------------------------------------------------------------|



|             |          |       |              |          |                   |         |                                                                                                                                                                                                                                                           |          |                                |       |       |                                                                                                                                                                                                                                 |                                                                                                                                                                                                                                                                                                                                                                                       |                                                                                                                                                                                                                                                                                                |                                                                                                                                                                                                                                                                                                                                                                          |
|-------------|----------|-------|--------------|----------|-------------------|---------|-----------------------------------------------------------------------------------------------------------------------------------------------------------------------------------------------------------------------------------------------------------|----------|--------------------------------|-------|-------|---------------------------------------------------------------------------------------------------------------------------------------------------------------------------------------------------------------------------------|---------------------------------------------------------------------------------------------------------------------------------------------------------------------------------------------------------------------------------------------------------------------------------------------------------------------------------------------------------------------------------------|------------------------------------------------------------------------------------------------------------------------------------------------------------------------------------------------------------------------------------------------------------------------------------------------|--------------------------------------------------------------------------------------------------------------------------------------------------------------------------------------------------------------------------------------------------------------------------------------------------------------------------------------------------------------------------|
| 221528_s_at | BC000143 | ELMO2 | Homo sapiens | 6-Oct-14 | Exemplar sequence | GenBank | gb:BC000143.1 /DEF=Homo sapiens, Similar to hypothetical protein FLJ11656, clone MGC:5247, mRNA, complete cds. /FEA=mRNA /PROD=Similar to hypothetical protein FLJ11656 /DB_XREF=gj:12652782 /UG=Hs.96560 hypothetical protein FLJ11656 /FL=gb:BC000143.1 | BC000143 | engulfment and cell motility 2 | ELMO2 | 63916 | NM_022086 ///<br>NM_133171 ///<br>NM_182764 ///<br>XM_005260496 ///<br>XM_005260497 ///<br>XM_005260498 ///<br>XM_005260499 ///<br>XM_005260500 ///<br>XM_005260501 ///<br>XM_005260502 ///<br>XM_006723854 ///<br>XM_006723855 | 0006909 // phagocytosis // inferred from electronic annotation /// 0006915 // apoptotic process // inferred from electronic annotation /// 0038096 // Fc-gamma receptor signaling pathway involved in phagocytosis // traceable author statement /// 0045087 // innate immune response // traceable author statement /// 0060326 // cell chemotaxis // inferred from mutant phenotype | 0005737 // cytoplasm // inferred from electronic annotation /// 0005829 // cytosol // inferred from direct assay /// 0005829 // cytosol // traceable author statement /// 0005856 // cytoskeleton // inferred from electronic annotation /// 0016020 // membrane // inferred from direct assay | 0005488 // binding // inferred from electronic annotation /// 0005515 // protein binding // inferred from physical interaction /// 0005543 // phospholipid binding // inferred from electronic annotation /// 0017124 // SH3 domain binding // inferred from electronic annotation /// 0030971 // receptor tyrosine kinase binding // inferred from physical interaction |
|-------------|----------|-------|--------------|----------|-------------------|---------|-----------------------------------------------------------------------------------------------------------------------------------------------------------------------------------------------------------------------------------------------------------|----------|--------------------------------|-------|-------|---------------------------------------------------------------------------------------------------------------------------------------------------------------------------------------------------------------------------------|---------------------------------------------------------------------------------------------------------------------------------------------------------------------------------------------------------------------------------------------------------------------------------------------------------------------------------------------------------------------------------------|------------------------------------------------------------------------------------------------------------------------------------------------------------------------------------------------------------------------------------------------------------------------------------------------|--------------------------------------------------------------------------------------------------------------------------------------------------------------------------------------------------------------------------------------------------------------------------------------------------------------------------------------------------------------------------|

|             |          |       |              |          |                   |         |                                                                                                                                                                                                                                             |          |                       |       |      |                                             |                                                                                                                                                                                                                                                                                                                                                                                                                                                                                                                                                                                                            |                                                                                                                                                                                                                                                                                                                                                                                               |                                                                                                                                                                                                           |
|-------------|----------|-------|--------------|----------|-------------------|---------|---------------------------------------------------------------------------------------------------------------------------------------------------------------------------------------------------------------------------------------------|----------|-----------------------|-------|------|---------------------------------------------|------------------------------------------------------------------------------------------------------------------------------------------------------------------------------------------------------------------------------------------------------------------------------------------------------------------------------------------------------------------------------------------------------------------------------------------------------------------------------------------------------------------------------------------------------------------------------------------------------------|-----------------------------------------------------------------------------------------------------------------------------------------------------------------------------------------------------------------------------------------------------------------------------------------------------------------------------------------------------------------------------------------------|-----------------------------------------------------------------------------------------------------------------------------------------------------------------------------------------------------------|
| 221593_s_at | BC001663 | RPL31 | Homo sapiens | 6-Oct-14 | Exemplar sequence | GenBank | gb:BC001663.1 /DEF=Homo sapiens, Similar to ribosomal protein L31, clone MGC:1641, mRNA, complete cds. /FEA=mRNA /PROD=Similar to ribosomal protein L31 /DB_XREF=gi:12804504 /UG=Hs.164170 vascular Rab-GAPTBC-containing /FL=gb:BC001663.1 | BC001663 | ribosomal protein L31 | RPL31 | 6160 | NM_000993 /// NM_001098577 /// NM_001099693 | 0000184 // nuclear-transcribed mRNA catabolic process, nonsense-mediated decay // traceable author statement /// 0006412 // translation // non-traceable author statement /// 0006412 // translation // traceable author statement /// 0006413 // translational initiation // traceable author statement /// 0006414 // translational elongation // traceable author statement /// 0006415 // translational termination // traceable author statement /// 0006614 // SRP-dependent cotranslational protein targeting to membrane // traceable author statement /// 0010467 // gene expression // traceable | 0005622 // intracellular // inferred from electronic annotation /// 0005829 // cytosol // traceable author statement /// 0005840 // ribosome // inferred from electronic annotation /// 0016020 // membrane // inferred from direct assay /// 0022625 // cytosolic large ribosomal subunit // inferred from direct assay /// 0030529 // ribonucleoprotein complex // inferred from electronic | 0003723 // RNA binding // traceable author statement /// 0003735 // structural constituent of ribosome // non-traceable author statement /// 0044822 // poly(A) RNA binding // inferred from direct assay |
|-------------|----------|-------|--------------|----------|-------------------|---------|---------------------------------------------------------------------------------------------------------------------------------------------------------------------------------------------------------------------------------------------|----------|-----------------------|-------|------|---------------------------------------------|------------------------------------------------------------------------------------------------------------------------------------------------------------------------------------------------------------------------------------------------------------------------------------------------------------------------------------------------------------------------------------------------------------------------------------------------------------------------------------------------------------------------------------------------------------------------------------------------------------|-----------------------------------------------------------------------------------------------------------------------------------------------------------------------------------------------------------------------------------------------------------------------------------------------------------------------------------------------------------------------------------------------|-----------------------------------------------------------------------------------------------------------------------------------------------------------------------------------------------------------|

|             |          |      |              |          |                   |         |                                                                                                                                                                                                                                                             |          |                                               |      |     |                                                                                                                                                       |                                                                                                                                                                                                                                                                                                                                                                                                                                          |                                                                                                                                                                                                         |                                                                                                                                                                                                                                                                                                                                                                                                                                                                                                                                                                                                                                                                |
|-------------|----------|------|--------------|----------|-------------------|---------|-------------------------------------------------------------------------------------------------------------------------------------------------------------------------------------------------------------------------------------------------------------|----------|-----------------------------------------------|------|-----|-------------------------------------------------------------------------------------------------------------------------------------------------------|------------------------------------------------------------------------------------------------------------------------------------------------------------------------------------------------------------------------------------------------------------------------------------------------------------------------------------------------------------------------------------------------------------------------------------------|---------------------------------------------------------------------------------------------------------------------------------------------------------------------------------------------------------|----------------------------------------------------------------------------------------------------------------------------------------------------------------------------------------------------------------------------------------------------------------------------------------------------------------------------------------------------------------------------------------------------------------------------------------------------------------------------------------------------------------------------------------------------------------------------------------------------------------------------------------------------------------|
| 221643_s_at | AF016005 | RERE | Homo sapiens | 6-Oct-14 | Exemplar sequence | GenBank | gb:AF016005.1 /DEF=Homo sapiens chromosome 1 atrophin-1 related protein (DRPLA) mRNA, complete cds. /FEA=mRNA /GEN=DRPLA /PROD=atrophin-1 related protein /DB_XREF=gi:3411014 /UG=Hs.194369 arginine-glutamic acid dipeptide (RE) repeats /FL=gb:AF016005.1 | AF016005 | arginine-glutamic acid dipeptide (RE) repeats | RERE | 473 | NM_001042681 ///<br>NM_001042682 ///<br>NM_012102 ///<br>XM_005263464 ///<br>XM_005263465 ///<br>XM_005263466 ///<br>XM_006710653 ///<br>XM_006710654 | 0006338 // chromatin remodeling // inferred from electronic annotation ///<br>0006351 // transcription, DNA-templated // inferred from electronic annotation ///<br>0006355 // transcription, DNA-templated // inferred from electronic annotation ///<br>0006607 // NLS-bearing protein import into nucleus // traceable author statement ///<br>0007275 // multicellular organismal development // inferred from electronic annotation | 0000118 // histone deacetylase complex // inferred from electronic annotation ///<br>0005634 // nucleus // non-traceable author statement ///<br>0005739 // mitochondrion // inferred from direct assay | 0003677 // DNA binding // inferred from electronic annotation ///<br>0003682 // chromatin binding // inferred from electronic annotation ///<br>0003700 // sequence-specific DNA binding transcription factor activity // inferred from electronic annotation ///<br>0005515 // protein binding // inferred from physical interaction ///<br>0008267 // poly-glutamine tract binding // traceable author statement ///<br>0008270 // zinc ion binding // inferred from electronic annotation ///<br>0043565 // sequence-specific DNA binding // inferred from electronic annotation ///<br>0046872 // metal ion binding // inferred from electronic annotation |
|-------------|----------|------|--------------|----------|-------------------|---------|-------------------------------------------------------------------------------------------------------------------------------------------------------------------------------------------------------------------------------------------------------------|----------|-----------------------------------------------|------|-----|-------------------------------------------------------------------------------------------------------------------------------------------------------|------------------------------------------------------------------------------------------------------------------------------------------------------------------------------------------------------------------------------------------------------------------------------------------------------------------------------------------------------------------------------------------------------------------------------------------|---------------------------------------------------------------------------------------------------------------------------------------------------------------------------------------------------------|----------------------------------------------------------------------------------------------------------------------------------------------------------------------------------------------------------------------------------------------------------------------------------------------------------------------------------------------------------------------------------------------------------------------------------------------------------------------------------------------------------------------------------------------------------------------------------------------------------------------------------------------------------------|

|             |          |      |              |          |                   |         |                                                                                                                                                                                                        |          |                                                            |                      |                  |                                             |                                                                                                                                                                                                                                                                                                                                                                                                                                                                                                                                                                                                                                   |                                                                                                                                                                                                                                                                                                                                                                                            |                                                                                                                                                                                                                                                                                                                                                                                                                                                                                                                                                                                                |
|-------------|----------|------|--------------|----------|-------------------|---------|--------------------------------------------------------------------------------------------------------------------------------------------------------------------------------------------------------|----------|------------------------------------------------------------|----------------------|------------------|---------------------------------------------|-----------------------------------------------------------------------------------------------------------------------------------------------------------------------------------------------------------------------------------------------------------------------------------------------------------------------------------------------------------------------------------------------------------------------------------------------------------------------------------------------------------------------------------------------------------------------------------------------------------------------------------|--------------------------------------------------------------------------------------------------------------------------------------------------------------------------------------------------------------------------------------------------------------------------------------------------------------------------------------------------------------------------------------------|------------------------------------------------------------------------------------------------------------------------------------------------------------------------------------------------------------------------------------------------------------------------------------------------------------------------------------------------------------------------------------------------------------------------------------------------------------------------------------------------------------------------------------------------------------------------------------------------|
| 221649_s_at | BC000535 | PPAN | Homo sapiens | 6-Oct-14 | Exemplar sequence | GenBank | gb:BC000535.1 /DEF=Homo sapiens, clone MGC:3007, mRNA, complete cds. /FEA=mRNA /PROD=Unknown (protein for MGC:3007) /DB_XREF=gi:12653526 /UG=Hs.65302 peter pan (Drosophila) homolog /FL=gb:BC000535.1 | BC000535 | peter pan homolog (Drosophila) /// PPAN-P2RY11 readthrough | PPAN /// PPAN-P2RY11 | 56342 /// 692312 | NM_001040664 /// NM_001198690 /// NM_020230 | 0001973 // adenosine receptor signaling pathway // inferred from direct assay /// 0006952 // defense response // traceable author statement /// 0007165 // signal transduction // inferred from electronic annotation /// 0007186 // G-protein coupled receptor signaling pathway // inferred from direct assay /// 0007186 // G-protein coupled receptor signaling pathway // inferred from electronic annotation /// 0007190 // activation of adenylate cyclase activity // traceable author statement /// 0007200 // phospholipase C-activating G-protein coupled receptor signaling pathway // traceable author statement /// | 0005634 // nucleus // inferred from direct assay /// 0005730 // nucleolus // inferred from electronic annotation /// 0005737 // cytoplasm // inferred from direct assay /// 0005886 // plasma membrane // inferred from electronic annotation /// 0005886 // plasma membrane // traceable author statement /// 0005887 // integral component of plasma membrane // inferred by curator /// | 0004871 // signal transducer activity // inferred from electronic annotation /// 0004872 // receptor activity // traceable author statement /// 0004930 // G-protein coupled receptor activity // inferred from electronic annotation /// 0030594 // neurotransmitter receptor activity // inferred from direct assay /// 0044822 // poly(A) RNA binding // inferred from direct assay /// 0045028 // G-protein coupled purinergic nucleotide receptor activity // inferred from electronic annotation /// 0045031 // ATP-activated nucleotide receptor activity // inferred from direct assay |
|-------------|----------|------|--------------|----------|-------------------|---------|--------------------------------------------------------------------------------------------------------------------------------------------------------------------------------------------------------|----------|------------------------------------------------------------|----------------------|------------------|---------------------------------------------|-----------------------------------------------------------------------------------------------------------------------------------------------------------------------------------------------------------------------------------------------------------------------------------------------------------------------------------------------------------------------------------------------------------------------------------------------------------------------------------------------------------------------------------------------------------------------------------------------------------------------------------|--------------------------------------------------------------------------------------------------------------------------------------------------------------------------------------------------------------------------------------------------------------------------------------------------------------------------------------------------------------------------------------------|------------------------------------------------------------------------------------------------------------------------------------------------------------------------------------------------------------------------------------------------------------------------------------------------------------------------------------------------------------------------------------------------------------------------------------------------------------------------------------------------------------------------------------------------------------------------------------------------|

|             |          |           |              |          |                    |         |                                                                                                                                                                                                                      |          |                                       |           |        |                                                                                                                              |                                                                                                                                                                                                                                                                                                                                                                                                                            |                                                                                                                                                                                                      |                                                                                                                                                                                                               |
|-------------|----------|-----------|--------------|----------|--------------------|---------|----------------------------------------------------------------------------------------------------------------------------------------------------------------------------------------------------------------------|----------|---------------------------------------|-----------|--------|------------------------------------------------------------------------------------------------------------------------------|----------------------------------------------------------------------------------------------------------------------------------------------------------------------------------------------------------------------------------------------------------------------------------------------------------------------------------------------------------------------------------------------------------------------------|------------------------------------------------------------------------------------------------------------------------------------------------------------------------------------------------------|---------------------------------------------------------------------------------------------------------------------------------------------------------------------------------------------------------------|
| 222105_s_at | AA452565 | NKIRAS2   | Homo sapiens | 6-Oct-14 | Consensus sequence | GenBank | Consensus includes<br>gb:AA452565<br>/FEA=EST<br>/DB_XREF=gi:2166234<br>/DB_XREF=est:zx35g11.s1<br>/CLONE=IMAGE:788516<br>/UG=Hs.22937 I-kappa-B-interacting Ras-like protein 2<br>/FL=gb:AF229840.1                 | AA452565 | NFKB inhibitor interacting Ras-like 2 | NKIRAS2   | 28511  | NM_001001349<br>///<br>NM_001144927<br>///<br>NM_001144928<br>///<br>NM_001144929<br>///<br>NM_017595<br>///<br>XM_005257251 | 0006184 // GTP catabolic process // inferred from electronic annotation ///<br>0007165 // signal transduction // inferred from electronic annotation ///<br>0007249 // I-kappaB kinase/NF-kappaB signaling // non-traceable author statement ///<br>0007264 // small GTPase mediated signal transduction // inferred from electronic annotation ///<br>0015031 // protein transport // inferred from electronic annotation | 0005622 // intracellular // inferred from electronic annotation ///<br>0005737 // cytoplasm // inferred from electronic annotation ///<br>0016020 // membrane // inferred from electronic annotation | 0000166 // nucleotide binding // inferred from electronic annotation ///<br>0003924 // GTPase activity // non-traceable author statement ///<br>0005525 // GTP binding // inferred from electronic annotation |
| 222279_at   | AI669379 | HLA-F-AS1 | Homo sapiens | 6-Oct-14 | Consensus sequence | GenBank | Consensus includes<br>gb:AI669379<br>/FEA=EST<br>/DB_XREF=gi:4834153<br>/DB_XREF=est:ty31g04.x1<br>/CLONE=IMAGE:2280726<br>/UG=Hs.178036 ESTs, Moderately similar to RL2B_HUMAN 60S RIBOSOMAL PROTEIN L23A H.sapiens | AI669379 | HLA-F antisense RNA 1                 | HLA-F-AS1 | 285830 | NM_001003807<br>///<br>NR_026972<br>///<br>NR_026973                                                                         | 0006955 // immune response // inferred from electronic annotation ///<br>0019882 // antigen processing and presentation // inferred from electronic annotation                                                                                                                                                                                                                                                             | 0016020 // membrane // inferred from electronic annotation                                                                                                                                           |                                                                                                                                                                                                               |

|          |        |      |              |          |                   |         |                                                                                                                                        |        |                  |      |       |                                                                                                                                   |                                                                                                                                                                                                                                                                                                                                                                                                                                                                                                                                                                                                                                                                                              |                                                                                                                                                                                                                                                                                                                                               |                                                                                                                                                                                                                                                                                                                           |
|----------|--------|------|--------------|----------|-------------------|---------|----------------------------------------------------------------------------------------------------------------------------------------|--------|------------------|------|-------|-----------------------------------------------------------------------------------------------------------------------------------|----------------------------------------------------------------------------------------------------------------------------------------------------------------------------------------------------------------------------------------------------------------------------------------------------------------------------------------------------------------------------------------------------------------------------------------------------------------------------------------------------------------------------------------------------------------------------------------------------------------------------------------------------------------------------------------------|-----------------------------------------------------------------------------------------------------------------------------------------------------------------------------------------------------------------------------------------------------------------------------------------------------------------------------------------------|---------------------------------------------------------------------------------------------------------------------------------------------------------------------------------------------------------------------------------------------------------------------------------------------------------------------------|
| 266_s_at | L33930 | CD24 | Homo sapiens | 6-Oct-14 | Exemplar sequence | GenBank | L33930<br>/FEATURE=<br>/DEFINITION=H<br>UMCD24B<br>Homo sapiens<br>CD24 signal<br>transducer<br>mRNA,<br>complete cds<br>and 3' region | L33930 | CD24<br>molecule | CD24 | 1E+08 | NM_001291737<br>///<br>NM_001291738<br>///<br>NM_001291739<br>/// NM_013230<br>/// NR_117089 ///<br>NR_117090 ///<br>XM_005278329 | 0001666 // response to hypoxia // inferred from expression pattern ///<br>0001775 // cell activation // inferred from direct assay ///<br>0001959 // regulation of cytokine-mediated signaling pathway // inferred from sequence or structural similarity ///<br>0002237 // response to molecule of bacterial origin // inferred from sequence or structural similarity ///<br>0002768 // immune response-regulating cell surface receptor signaling pathway // inferred by curator ///<br>0007155 // cell adhesion // inferred from electronic annotation ///<br>0007204 // positive regulation of cytosolic calcium ion concentration // inferred from direct assay ///<br>0007411 // axon | 0005886 // plasma membrane // inferred from electronic annotation ///<br>0009986 // cell surface // inferred from direct assay ///<br>0016020 // membrane // inferred from direct assay ///<br>0031225 // anchored component of membrane // inferred from electronic annotation ///<br>0045121 // membrane raft // inferred from direct assay | 0004871 // signal transducer activity // non-traceable author statement ///<br>0005515 // protein binding // inferred from physical interaction ///<br>0019901 // protein kinase binding // inferred from physical interaction ///<br>0030296 // protein tyrosine kinase activator activity // inferred from direct assay |
|----------|--------|------|--------------|----------|-------------------|---------|----------------------------------------------------------------------------------------------------------------------------------------|--------|------------------|------|-------|-----------------------------------------------------------------------------------------------------------------------------------|----------------------------------------------------------------------------------------------------------------------------------------------------------------------------------------------------------------------------------------------------------------------------------------------------------------------------------------------------------------------------------------------------------------------------------------------------------------------------------------------------------------------------------------------------------------------------------------------------------------------------------------------------------------------------------------------|-----------------------------------------------------------------------------------------------------------------------------------------------------------------------------------------------------------------------------------------------------------------------------------------------------------------------------------------------|---------------------------------------------------------------------------------------------------------------------------------------------------------------------------------------------------------------------------------------------------------------------------------------------------------------------------|

|          |        |       |              |          |                    |         |                                                                                                                                                            |        |                                                                                                             |                                          |                                                    |                                                                                                        |                                                                                                                                                                                                                                                                                                                                                                                                                                                                                                                                                                                                                  |                                                                                                                                                                                                                              |                                                                                                                                                                                                                                                                                |
|----------|--------|-------|--------------|----------|--------------------|---------|------------------------------------------------------------------------------------------------------------------------------------------------------------|--------|-------------------------------------------------------------------------------------------------------------|------------------------------------------|----------------------------------------------------|--------------------------------------------------------------------------------------------------------|------------------------------------------------------------------------------------------------------------------------------------------------------------------------------------------------------------------------------------------------------------------------------------------------------------------------------------------------------------------------------------------------------------------------------------------------------------------------------------------------------------------------------------------------------------------------------------------------------------------|------------------------------------------------------------------------------------------------------------------------------------------------------------------------------------------------------------------------------|--------------------------------------------------------------------------------------------------------------------------------------------------------------------------------------------------------------------------------------------------------------------------------|
| 33132_at | U37012 | CPSF1 | Homo sapiens | 6-Oct-14 | Consensus sequence | GenBank | Cluster Incl. U37012:Human cleavage and polyadenylation specificity factor mRNA, complete cds /cds=(51,4379) /gb=U37012 /gi=1045573 /ug=Hs.83727 /len=4463 | U37012 | cleavage and polyadenylation specific factor 1, 160kDa /// microRNA 1234 /// microRNA 6849 /// microRNA 939 | CPSF1 /// MIR1234 /// MIR6849 /// MIR939 | 29894 /// 10012635 1 /// 10030219 6 /// 10246674 9 | NM_013291 /// NR_030635 /// NR_031600 /// NR_106908 /// XM_006716548 /// XM_006716549 /// XM_006716550 | 0000398 // mRNA splicing, via spliceosome // traceable author statement /// 0006366 // transcription from RNA polymerase II promoter // traceable author statement /// 0006369 // termination of RNA polymerase II transcription // traceable author statement /// 0006378 // mRNA polyadenylation // inferred from direct assay /// 0006379 // mRNA cleavage // inferred from direct assay /// 0006397 // mRNA processing // inferred from electronic annotation /// 0006406 // mRNA export from nucleus // traceable author statement /// 0008380 // RNA splicing // traceable author statement /// 0010467 // | 0005634 // nucleus // inferred from electronic annotation /// 0005654 // nucleoplasm // traceable author statement /// 0005847 // mRNA cleavage and polyadenylation specificity factor complex // inferred from direct assay | 0003676 // nucleic acid binding // inferred from electronic annotation /// 0003723 // RNA binding // inferred from electronic annotation /// 0003730 // mRNA 3'-UTR binding // inferred from direct assay /// 0005515 // protein binding // inferred from physical interaction |
|----------|--------|-------|--------------|----------|--------------------|---------|------------------------------------------------------------------------------------------------------------------------------------------------------------|--------|-------------------------------------------------------------------------------------------------------------|------------------------------------------|----------------------------------------------------|--------------------------------------------------------------------------------------------------------|------------------------------------------------------------------------------------------------------------------------------------------------------------------------------------------------------------------------------------------------------------------------------------------------------------------------------------------------------------------------------------------------------------------------------------------------------------------------------------------------------------------------------------------------------------------------------------------------------------------|------------------------------------------------------------------------------------------------------------------------------------------------------------------------------------------------------------------------------|--------------------------------------------------------------------------------------------------------------------------------------------------------------------------------------------------------------------------------------------------------------------------------|

|          |          |       |              |          |                    |         |                                                                                                                                |          |                                                    |       |       |                                                                                                                                                                                                                                                                                                                                       |                                                                                                                                                                                                                                                                                                                                                                                                                                                                                                                                                                                                                                                    |                                                                                                                                                                                                                                                                                                                                                                                                           |                                                                                                                                                                                                                                                                                                                                                                                                                                            |
|----------|----------|-------|--------------|----------|--------------------|---------|--------------------------------------------------------------------------------------------------------------------------------|----------|----------------------------------------------------|-------|-------|---------------------------------------------------------------------------------------------------------------------------------------------------------------------------------------------------------------------------------------------------------------------------------------------------------------------------------------|----------------------------------------------------------------------------------------------------------------------------------------------------------------------------------------------------------------------------------------------------------------------------------------------------------------------------------------------------------------------------------------------------------------------------------------------------------------------------------------------------------------------------------------------------------------------------------------------------------------------------------------------------|-----------------------------------------------------------------------------------------------------------------------------------------------------------------------------------------------------------------------------------------------------------------------------------------------------------------------------------------------------------------------------------------------------------|--------------------------------------------------------------------------------------------------------------------------------------------------------------------------------------------------------------------------------------------------------------------------------------------------------------------------------------------------------------------------------------------------------------------------------------------|
| 35147_at | AB002360 | MCF2L | Homo sapiens | 6-Oct-14 | Consensus sequence | GenBank | Cluster Incl. AB002360:Human mRNA for KIAA0362 gene, partial cds /cds=(0,3327) /gb=AB002360 /gi=2224664 /ug=Hs.25515 /len=5391 | AB002360 | MCF.2 cell line derived transforming sequence-like | MCF2L | 23263 | NM_001112732<br>/// NM_024979<br>///<br>XM_005268307<br>///<br>XM_005268308<br>///<br>XM_005268309<br>///<br>XM_005268310<br>///<br>XM_005268312<br>///<br>XM_005268313<br>///<br>XM_005268314<br>///<br>XM_005268315<br>///<br>XM_005268316<br>///<br>XM_006719966<br>///<br>XM_006719967<br>///<br>XM_006719968<br>///<br>XR_429282 | 0007264 // small GTPase mediated signal transduction // traceable author statement ///<br>0007266 // Rho protein signal transduction // inferred from electronic annotation /// 0032319 // regulation of Rho GTPase activity // inferred from electronic annotation ///<br>0032321 // positive regulation of Rho GTPase activity // inferred from electronic annotation ///<br>0035023 // regulation of Rho protein signal transduction // inferred from electronic annotation /// 0035556 // intracellular signal transduction // inferred from electronic annotation /// 0043065 // positive regulation of apoptotic process // traceable author | 0005615 // extracellular space // inferred from direct assay ///<br>0005737 // cytoplasm // inferred from electronic annotation ///<br>0005829 // cytosol // traceable author statement ///<br>0005886 // plasma membrane // inferred from electronic annotation ///<br>0016020 // membrane // inferred from electronic annotation ///<br>0030027 // lamellipodium // inferred from electronic annotation | 0005085 // guanyl-nucleotide exchange factor activity // inferred from electronic annotation /// 0005089 // Rho guanyl-nucleotide exchange factor activity // inferred from electronic annotation /// 0005515 // protein binding // inferred from electronic annotation /// 0005543 // phospholipid binding // inferred from electronic annotation ///<br>0005545 // 1-phosphatidylinositol binding // inferred from electronic annotation |
|----------|----------|-------|--------------|----------|--------------------|---------|--------------------------------------------------------------------------------------------------------------------------------|----------|----------------------------------------------------|-------|-------|---------------------------------------------------------------------------------------------------------------------------------------------------------------------------------------------------------------------------------------------------------------------------------------------------------------------------------------|----------------------------------------------------------------------------------------------------------------------------------------------------------------------------------------------------------------------------------------------------------------------------------------------------------------------------------------------------------------------------------------------------------------------------------------------------------------------------------------------------------------------------------------------------------------------------------------------------------------------------------------------------|-----------------------------------------------------------------------------------------------------------------------------------------------------------------------------------------------------------------------------------------------------------------------------------------------------------------------------------------------------------------------------------------------------------|--------------------------------------------------------------------------------------------------------------------------------------------------------------------------------------------------------------------------------------------------------------------------------------------------------------------------------------------------------------------------------------------------------------------------------------------|



|          |          |      |              |          |                    |         |                                                                                                                         |          |                        |      |       |                                                                                                                     |                                                                                                                                                                                                                                                                                                                                                                                                                                                                                                                                                                                                                                     |                                                                                                                                                                                 |                                                                                                                                                                                                                                                                                                    |
|----------|----------|------|--------------|----------|--------------------|---------|-------------------------------------------------------------------------------------------------------------------------|----------|------------------------|------|-------|---------------------------------------------------------------------------------------------------------------------|-------------------------------------------------------------------------------------------------------------------------------------------------------------------------------------------------------------------------------------------------------------------------------------------------------------------------------------------------------------------------------------------------------------------------------------------------------------------------------------------------------------------------------------------------------------------------------------------------------------------------------------|---------------------------------------------------------------------------------------------------------------------------------------------------------------------------------|----------------------------------------------------------------------------------------------------------------------------------------------------------------------------------------------------------------------------------------------------------------------------------------------------|
| 47069_at | AA533284 | PRR5 | Homo sapiens | 6-Oct-14 | Consensus sequence | GenBank | Cluster Incl. AA533284:nj66 e12.s1 Homo sapiens cDNA /clone=IMAGE-997486 /gb=AA533284 /gi=2277380 /ug=Hs.79601 /len=613 | AA533284 | proline rich 5 (renal) | PRR5 | 55615 | NM_001017528<br>///<br>NM_001017529<br>///<br>NM_001017530<br>///<br>NM_001198721<br>/// NM_015366<br>/// NM_181333 | 0001934 // positive regulation of protein phosphorylation // inferred from electronic annotation /// 0007049 // cell cycle // inferred from electronic annotation /// 0007165 // signal transduction // inferred from electronic annotation /// 0007264 // small GTPase mediated signal transduction // traceable author statement /// 0014068 // positive regulation of phosphatidylinositol 3-kinase signaling // inferred from electronic annotation /// 0030036 // actin cytoskeleton organization // inferred from direct assay /// 0030335 // positive regulation of cell migration // inferred from direct assay /// 0032321 | 0005622 // intracellular // inferred from electronic annotation /// 0005829 // cytosol // traceable author statement /// 0031932 // TORC2 complex // inferred from direct assay | 0005096 // GTPase activator activity // inferred from electronic annotation /// 0005096 // GTPase activator activity // inferred from direct assay /// 0005100 // Rho GTPase activator activity // inferred from direct assay /// 0005515 // protein binding // inferred from physical interaction |
|----------|----------|------|--------------|----------|--------------------|---------|-------------------------------------------------------------------------------------------------------------------------|----------|------------------------|------|-------|---------------------------------------------------------------------------------------------------------------------|-------------------------------------------------------------------------------------------------------------------------------------------------------------------------------------------------------------------------------------------------------------------------------------------------------------------------------------------------------------------------------------------------------------------------------------------------------------------------------------------------------------------------------------------------------------------------------------------------------------------------------------|---------------------------------------------------------------------------------------------------------------------------------------------------------------------------------|----------------------------------------------------------------------------------------------------------------------------------------------------------------------------------------------------------------------------------------------------------------------------------------------------|

|          |        |       |              |          |                    |         |                                                                                                                                           |        |                                |       |       |                                                                                                                                                                                                                                 |                                                                                                                                                                                                                                                                                                                                                                                                                                    |                                                                                                                                                                                                                                                                                                                                    |                                                                                                                                                                                                                                                                                                                                                                                                                 |
|----------|--------|-------|--------------|----------|--------------------|---------|-------------------------------------------------------------------------------------------------------------------------------------------|--------|--------------------------------|-------|-------|---------------------------------------------------------------------------------------------------------------------------------------------------------------------------------------------------------------------------------|------------------------------------------------------------------------------------------------------------------------------------------------------------------------------------------------------------------------------------------------------------------------------------------------------------------------------------------------------------------------------------------------------------------------------------|------------------------------------------------------------------------------------------------------------------------------------------------------------------------------------------------------------------------------------------------------------------------------------------------------------------------------------|-----------------------------------------------------------------------------------------------------------------------------------------------------------------------------------------------------------------------------------------------------------------------------------------------------------------------------------------------------------------------------------------------------------------|
| 55692_at | W22924 | ELMO2 | Homo sapiens | 6-Oct-14 | Consensus sequence | GenBank | Cluster Incl.<br>W22924:75H3<br>Homo sapiens<br>cDNA<br>/clone=(not-directional)<br>/gb=W22924<br>/gi=1299757<br>/ug=Hs.96560<br>/len=792 | W22924 | engulfment and cell motility 2 | ELMO2 | 63916 | NM_022086 ///<br>NM_133171 ///<br>NM_182764 ///<br>XM_005260496 ///<br>XM_005260497 ///<br>XM_005260498 ///<br>XM_005260499 ///<br>XM_005260500 ///<br>XM_005260501 ///<br>XM_005260502 ///<br>XM_006723854 ///<br>XM_006723855 | 0006909 // phagocytosis<br>// inferred from electronic<br>annotation /// 0006915 //<br>apoptotic process //<br>inferred from electronic<br>annotation /// 0038096 //<br>Fc-gamma receptor<br>signaling pathway<br>involved in phagocytosis<br>// traceable author<br>statement /// 0045087 //<br>innate immune response<br>// traceable author<br>statement /// 0060326 //<br>cell chemotaxis // inferred<br>from mutant phenotype | 0005737 // cytoplasm //<br>inferred from electronic<br>annotation ///<br>0005829 // cytosol<br>// inferred from direct assay ///<br>0005829 // cytosol<br>// traceable author<br>statement ///<br>0005856 // cytoskeleton //<br>inferred from electronic<br>annotation ///<br>0016020 // membrane //<br>inferred from direct assay | 0005488 // binding //<br>inferred from electronic<br>annotation /// 0005515 //<br>protein binding // inferred<br>from physical interaction ///<br>0005543 // phospholipid<br>binding // inferred from<br>electronic annotation ///<br>0017124 // SH3 domain<br>binding // inferred from<br>electronic annotation ///<br>0030971 // receptor tyrosine<br>kinase binding // inferred<br>from physical interaction |
|----------|--------|-------|--------------|----------|--------------------|---------|-------------------------------------------------------------------------------------------------------------------------------------------|--------|--------------------------------|-------|-------|---------------------------------------------------------------------------------------------------------------------------------------------------------------------------------------------------------------------------------|------------------------------------------------------------------------------------------------------------------------------------------------------------------------------------------------------------------------------------------------------------------------------------------------------------------------------------------------------------------------------------------------------------------------------------|------------------------------------------------------------------------------------------------------------------------------------------------------------------------------------------------------------------------------------------------------------------------------------------------------------------------------------|-----------------------------------------------------------------------------------------------------------------------------------------------------------------------------------------------------------------------------------------------------------------------------------------------------------------------------------------------------------------------------------------------------------------|
