# Supplementary material for: Association between Arsenic Level, Gene Expression in Asian Population, and In Vitro Carcinogenic Bladder Tumor
Source: Hindawi journal article supplement (doi:10.1155/2022/3459855), 2022-01-01
Supplement: f12 [file 3459855.f12.pdf]

**Table S11. Survival information of 18 genes differentially expressed between sex and common between ATO and aersin exposed human**

| Genes     | Survival                                                                                                                |
|-----------|-------------------------------------------------------------------------------------------------------------------------|
| BTG2      | Prognostic marker in breast cancer (favorable)                                                                          |
| CD24      | Prognostic marker in breast cancer (unfavorable), colorectal cancer (favorable) and liver cancer (unfavorable)          |
| OLFM4     | Prognostic marker in breast cancer (favorable)                                                                          |
| BACE2     | Prognostic marker in cervical cancer (unfavorable)                                                                      |
| CXCR4     | Prognostic marker in renal cancer (unfavorable), ovarian cancer (favorable) and stomach cancer (unfavorable)            |
| PHACTR1   | Prognostic marker in renal cancer (unfavorable)                                                                         |
| CRIM1     | Prognostic marker in renal cancer (favorable)                                                                           |
| TNFRSF12A | Prognostic marker in renal cancer (unfavorable), head and neck cancer (unfavorable)                                     |
| TSPAN5    | Prognostic marker in renal cancer (unfavorable) and stomach cancer (unfavorable)                                        |
| RGS       | Prognostic marker in renal cancer (unfavorable) and stomach cancer (unfavorable)                                        |
| PMAIP1    | Prognostic marker in renal cancer (unfavorable)                                                                         |
| SLC29A1   | Prognostic marker in renal cancer (unfavorable)                                                                         |
| DDIT4     | Prognostic marker in renal cancer (unfavorable), pancreatic cancer (unfavorable) and head and neck cancer (unfavorable) |
| DDX3Y     | Prognostic marker in head and neck cancer (favorable)                                                                   |
| MYB       | Prognostic marker in prostate cancer (favorable) and stomach cancer (favorable)                                         |
| EGR1      | Gene product is not prognostic                                                                                          |
| TRIB1     | Gene product is not prognostic                                                                                          |
| SMAD5     | Gene product is not prognostic                                                                                          |
