# Supplementary material for: Association between Arsenic Level, Gene Expression in Asian Population, and In Vitro Carcinogenic Bladder Tumor
Source: Oxid Med Cell Longev. 2022 Jan 7;2022:3459855. doi: 10.1155/2022/3459855 (PMC8760535; doi:10.1155/2022/3459855)
Supplement: Supplementary 10 — Table S9: significant pathways in Data1 and Data2 (low, medium, and high concentrations) and the overlap between various combinations. [file 3459855.f10.pdf]

Table S9. Significant pathways in Data-1 and Data-2 (low, medium, and high concentrations) and the overlap between various combinations.

| Population                                        | Total | Pathways                                                  |
|---------------------------------------------------|-------|-----------------------------------------------------------|
| Data-1, Data-2 (low, high) & Data-2 (low, medium) | 2     | ILK Signaling                                             |
|                                                   |       | Neuroinflammation Signaling Pathway                       |
| Data-2 (low, high) & Data-2 (low, medium)         | 10    | TREM1 Signaling                                           |
|                                                   |       | IL-8 Signaling                                            |
|                                                   |       | Communication between Innate and Adaptive Immune Cells    |
|                                                   |       | MIF Regulation of Innate Immunity                         |
|                                                   |       | Osteoarthritis Pathway                                    |
|                                                   |       | Airway Pathology in Chronic Obstructive Pulmonary Disease |
|                                                   |       | CDK5 Signaling                                            |
|                                                   |       | Gai Signaling                                             |
|                                                   |       | Inhibition of Matrix Metalloproteases                     |
|                                                   |       | Atherosclerosis Signaling                                 |
| Data-2 (low, high) & Data-2 (medium, high)        | 1     | Methylglyoxal Degradation I                               |
| Data-1 & Data-2 (low, high)                       | 6     | GDNF Family Ligand-Receptor Interactions                  |
|                                                   |       | HOTAIR Regulatory Pathway                                 |
|                                                   |       | Fc Epsilon RI Signaling                                   |
|                                                   |       | PDGF Signaling                                            |
|                                                   |       | VEGF Family Ligand-Receptor Interactions                  |
|                                                   |       | Phagosome Formation                                       |
| Data-1 & Data-2 (low, medium)                     | 3     | Thyroid Cancer Signaling                                  |
|                                                   |       | Caveolar-mediated Endocytosis Signaling                   |
|                                                   |       | Macropinocytosis Signaling                                |
| Data-1 & Data-2 (medium, high)                    | 4     | Serine Biosynthesis                                       |
|                                                   |       | Phagosome Maturation                                      |
|                                                   |       | EIF2 Signaling                                            |
|                                                   |       | Iron homeostasis signaling pathway                        |
| Data-2 (low, high)                                | 12    | Neuroprotective Role of THOP1 in Alzheimer's Disease      |
|                                                   |       | Hematopoiesis from Pluripotent Stem Cells                 |
|                                                   |       | Cell Cycle: G2/M DNA Damage Checkpoint Regulation         |
|                                                   |       | LXR/RXR Activation                                        |
|                                                   |       | Phospholipase C Signaling                                 |
|                                                   |       | Eicosanoid Signaling                                      |
|                                                   |       | Anandamide Degradation                                    |
|                                                   |       | White Adipose Tissue Browning Pathway                     |

|                       |    |                                                                                                       |
|-----------------------|----|-------------------------------------------------------------------------------------------------------|
|                       |    | Sirtuin Signaling Pathway                                                                             |
|                       |    | Acute Phase Response Signaling                                                                        |
|                       |    | p38 MAPK Signaling                                                                                    |
|                       |    | MIF-mediated Glucocorticoid Regulation                                                                |
| Data-2 (low, medium)  | 20 | ERK5 Signaling                                                                                        |
|                       |    | Pathogenesis of Multiple Sclerosis                                                                    |
|                       |    | G-Protein Coupled Receptor Signaling                                                                  |
|                       |    | Differential Regulation of Cytokine Production in Intestinal Epithelial Cells by IL-17A and IL-17F    |
|                       |    | Role of IL-17A in Psoriasis                                                                           |
|                       |    | Differential Regulation of Cytokine Production in Macrophages and T Helper Cells by IL-17A and IL-17F |
|                       |    | IL-17A Signaling in Gastric Cells                                                                     |
|                       |    | Granulocyte Adhesion and Diapedesis                                                                   |
|                       |    | Relaxin Signaling                                                                                     |
|                       |    | Role of IL-17F in Allergic Inflammatory Airway Diseases                                               |
|                       |    | Bladder Cancer Signaling                                                                              |
|                       |    | Breast Cancer Regulation by Stathmin1                                                                 |
|                       |    | Role of Hypercytokinemia/hyperchemokinema in the Pathogenesis of Influenza                            |
|                       |    | Aryl Hydrocarbon Receptor Signaling                                                                   |
|                       |    | p53 Signaling                                                                                         |
|                       |    | Agranulocyte Adhesion and Diapedesis                                                                  |
|                       |    | PI3K/AKT Signaling                                                                                    |
|                       |    | Role of IL-17A in Arthritis                                                                           |
|                       |    | IGF-1 Signaling                                                                                       |
|                       |    | Glucocorticoid Receptor Signaling                                                                     |
| Data-2 (medium, high) | 11 | Superpathway of Serine and Glycine Biosynthesis I                                                     |
|                       |    | Coronavirus Pathogenesis Pathway                                                                      |
|                       |    | Remodeling of Epithelial Adherens Junctions                                                           |
|                       |    | mTOR Signaling                                                                                        |
|                       |    | Role of Pattern Recognition Receptors in Recognition of Bacteria and Viruses                          |
|                       |    | Sertoli Cell-Sertoli Cell Junction Signaling                                                          |
|                       |    | Germ Cell-Sertoli Cell Junction Signaling                                                             |
|                       |    | Phenylalanine Degradation I (Aerobic)                                                                 |

|                                                   |
|---------------------------------------------------|
| γ-glutamyl Cycle                                  |
| Epithelial Adherens Junction Signaling            |
| Regulation of eIF4 and p70S6K Signaling           |
| Reelin Signaling in Neurons                       |
| Molecular Mechanisms of Cancer                    |
| fMLP Signaling in Neutrophils                     |
| NF-κB Activation by Viruses                       |
| Synaptic Long Term Depression                     |
| Gap Junction Signaling                            |
| PKCθ Signaling in T Lymphocytes                   |
| Role of NFAT in Regulation of the Immune Response |
| LPS-stimulated MAPK Signaling                     |
| Glioblastoma Multiforme Signaling                 |
| Glycogen Degradation III                          |
| Insulin Secretion Signaling Pathway               |
| Renin-Angiotensin Signaling                       |
| IL-3 Signaling                                    |
| Leptin Signaling in Obesity                       |
| Neurotrophin/TRK Signaling                        |
| Role of Tissue Factor in Cancer                   |
| Glioma Signaling                                  |
| ErbB Signaling                                    |
| Semaphorin Neuronal Repulsive Signaling Pathway   |
| Thrombopoietin Signaling                          |
| PI3K Signaling in B Lymphocytes                   |
| IL-9 Signaling                                    |
| Adrenomedullin signaling pathway                  |
| Angiopoietin Signaling                            |
| Role of JAK1 and JAK3 in γc Cytokine Signaling    |
| iCOS-iCOSL Signaling in T Helper Cells            |
| Myo-inositol Biosynthesis                         |
| Neuropathic Pain Signaling In Dorsal Horn Neurons |
| Leukocyte Extravasation Signaling                 |
| Apelin Cardiomyocyte Signaling Pathway            |
| T Cell Exhaustion Signaling Pathway               |
| CD40 Signaling                                    |

Data-1

97

|                                                |
|------------------------------------------------|
| CTLA4 Signaling in Cytotoxic T Lymphocytes     |
| Factors Promoting Cardiogenesis in Vertebrates |
| 2-ketoglutarate Dehydrogenase Complex          |
| Neuregulin Signaling                           |
| Lymphotoxin β Receptor Signaling               |
| Adipogenesis pathway                           |
| Heparan Sulfate Biosynthesis                   |
| Non-Small Cell Lung Cancer Signaling           |
| GP6 Signaling Pathway                          |
| NF-κB Signaling                                |
| Role of p14/p19ARF in Tumor Suppression        |
| Synaptic Long Term Potentiation                |
| Gαq Signaling                                  |
| Th2 Pathway                                    |
| 14-3-3-mediated Signaling                      |
| CD28 Signaling in T Helper Cells               |
| UVB-Induced MAPK Signaling                     |
| Hepatic Fibrosis Signaling Pathway             |
| ErbB4 Signaling                                |
| G Protein Signaling Mediated by Tubby          |
| Heparan Sulfate Biosynthesis (Late Stages)     |
| Amyloid Processing                             |
| Th1 and Th2 Activation Pathway                 |
| Coenzyme A Biosynthesis                        |
| Synaptogenesis Signaling Pathway               |
| Huntington's Disease Signaling                 |
| CCR3 Signaling in Eosinophils                  |
| eNOS Signaling                                 |
| P2Y Purigenic Receptor Signaling Pathway       |
| Prolactin Signaling                            |
| Tec Kinase Signaling                           |
| RAR Activation                                 |
| VEGF Signaling                                 |
| Virus Entry via Endocytic Pathways             |
| Endocannabinoid Neuronal Synapse Pathway       |
| p70S6K Signaling                               |

|                                                             |
|-------------------------------------------------------------|
| IL-4 Signaling                                              |
| Nitric Oxide Signaling in the Cardiovascular System         |
| HIPPO signaling                                             |
| Aldosterone Signaling in Epithelial Cells                   |
| Small Cell Lung Cancer Signaling                            |
| Human Embryonic Stem Cell Pluripotency                      |
| Erythropoietin Signaling                                    |
| Sulfate Activation for Sulfonation                          |
| CREB Signaling in Neurons                                   |
| Thrombin Signaling                                          |
| Type II Diabetes Mellitus Signaling                         |
| Dopamine-DARPP32 Feedback in cAMP Signaling                 |
| Growth Hormone Signaling                                    |
| FGF Signaling                                               |
| HGF Signaling                                               |
| HER-2 Signaling in Breast Cancer                            |
| Glioma Invasiveness Signaling                               |
| Gustation Pathway                                           |
| EGF Signaling                                               |
| IL-17 Signaling                                             |
| Axonal Guidance Signaling                                   |
| Endothelin-1 Signaling                                      |
| Calcium-induced T Lymphocyte Apoptosis                      |
| SPINK1 General Cancer Pathway                               |
| T Cell Receptor Signaling                                   |
| Role of NANOG in Mammalian Embryonic Stem Cell Pluripotency |
| NRF2-mediated Oxidative Stress Response                     |
| AMPK Signaling                                              |
